# Supplementary material
Source: PubMed Central journal article supplement (PMC2650175)
Supplement: 0813002106_0813002106SI.pdf [file 0813002106_0813002106SI.pdf]

# Supporting Information

Yu et al. 10.1073/pnas.0813002106

```
LOCUS      GXP_551436      1101 bp      DNA
DEFINITION loc=GXL_338887|sym=AQP2|geneid=486552|acc=GXP_551436|
            taxid=9615|spec=Canis familiaris|chr=27|ctg=NC_006609|
            str=(-)|start=7759584|end=7760684|len=1101|tss=1001|
            descr=aquaporin 2 (collecting duct)|
            ccomm=GXT_21955060/XM_543678/501/bronze
ACCESSION  GXP_551436
BASE COUNT      281 a   253 c   377 g   190 t
ORIGIN
1 TGGTGGCTTA CTGTGGGCCA GGTGTGGCTC TGAGCACTTT ACATCATTTT ATTTTCATTCA
61 AACCCCGATC CCTTGTAAAT TGATTATTCC CTATTTACAG AGATGGACAA GAAAGGGTAA
121 ATCTCAGAGA CAGAGCAGGG TGATGCTGCA ATGGAAGCCC GAAGCTTCCT CAGTCAACCA
181 CAGGTTGATC CCATCACGGG GGGCCAGGGT CCCCCGCCA CTGAAGCCAC CCCCTCCCTC
241 CAGGCTATGG AAGCTGCCTT TTGGCTGGGG TTCCAGGGAG GAGGTGAAGC TTAGTAACTT
301 ATGGGTAATT GGCTGCAAGA AAGGGAGCAC AGAAGAGACC TTACGCCTTG GAAAGTTCAT
361 GTCCCAAGCC AACCAGTTGT TTTCCATCCC TTTCAAGGGG GGATAATGGA AGGTTAACAA
421 CAGGAAGAGC TCCCCCATCA CCAGAAGGGG TAGCATTGAC ATCCTGTCTC ATGGTCAGTG
481 TCGAGTGAAG TGCTGTCCCT GCCTTGACCA ATACTTTGAG CTGGAGGGAG AGGGGTTTGG
541 CATCATCCCC TTGGAGAATC CCCATTCAAG GGACCACTGG GGGTAGGGGA GGCCCTGGGG
601 CAGCAGCCCT GGGGGAGCCA GGGAACAAAC ACGGAAAACC AGGGGACGTC AGTCCTTATC
661 TGGAGCTCAT TAATGGGGAA CATTAGTCAG CTGTGAAGGC CAAGATGGGG TGATAGGCAT
721 GCGGGTGGGC AGGGGAGGGG GGGGAGGAG GCAGCCAGAG GAGAGACAAG GTAAGGGCCC
781 AGACTCCACC TGCGCCTCAT CGTGTCAAA TACAGAGAGA AGCGCCCTAT AAATGCCCGT
841 AGCCAGCCCT CCCCAGAGAC CTTGAGAGAG AGAGAGAGAG AGAGAGAGAG GGAGGGAGGT
901 AGAGAGGGAG GGAGAGAGGG AAGAAGGGAG AGAGGGGAAG AGAGAGAGAG GGAGGGAGAG
961 AGGGAGGGAG GGAGGGAGGG AGGGAGGGAG GGAGGGAGCA CCCACGAGCT TCCATCGCCG
1021 GCCTGGGCCA GCCCACAGAG GGCCCCACAG CATGTGGGAA CTGCGCTCCG TAGCCTTCTC
1081 CAGGGCGGTG TTCGCCGAGT T

//
LOCUS      GXP_593991      1101 bp      DNA
DEFINITION loc=GXL_358532|sym=aqp2|geneid=539870|acc=GXP_593991|
            taxid=9913|spec=Bos taurus|chr=5|ctg=NC_007303|str=(-)|
            start=30623056|end=30624156|len=1101|tss=1001|
            descr=aquaporin 2|comm=GXT_21986527/XM_589978/1373/bronze
ACCESSION  GXP_593991
BASE COUNT      278 a   290 c   305 g   228 t
ORIGIN
1 CGGGACCCTA ACATGTGAGT TTGGGGAGTC ATGGTCCCTC CTGATGGTAC AAATAATGCT
61 ATTAATAACA GATGATATCA ACTGACAGCT TGCTGTGGGC CAGGAGCAGC TCTGAGCACT
121 TTCCATACAT TAGTTCATTT AATCTAAACC CCAAGCCCAC AGAGGTTTAT TATCCCCTTT
181 TGAATCACA GAGATGCACT ATGGAATGGA AAACCATGGC TTCCTCAGTC GACCTGAGCT
241 TGACTCCATC ACCCAAGGCC AGGATCCCAG CGCCTCTTAA ATTGCCCCCT GCTTCCAGGC
301 TATGAAAGCT GCTATTTGGC AGGGGTTCCA GGGAGCAAGT GAAGCTTAAT GATTTATGGA
361 TGACTGAGTG CAAGAAAGCA AACACAGGAG AGACACGAAA CCTCTATGCC TTGGAAGGTT
421 CGTGTACAC CAACCGGTTG TTTTCCATCC CCTGCGAGAT GGAGCTCAGT CAGCAGGAAG
481 GATGTCCCCG TCTCCAGAAG GGGTAGCACT GACACCCTGT TTCATGGTCA GTTCTGTAAG
541 GTGTTGCCCC TGACTTGGA AACAGTTTGA ATCAGAGAGA GGGGTTTGGC AGCATAAGCC
601 GTACAGAATC CCCATAGGAC CGGTGGGGAC AGGGGAGGCC CTGGGGCAGC TGCCCTAGGA
661 TAACCTAGGG AACAAACACG GAAAACCAGG GGACGTC AAT CCTATCTGG AGCTCATTAA
721 TGGGGAATC CATTCACTG TGAAGTCCTA GATGGGGTGA TAGGCATGCT GCGCCCAGGG
781 GTAGGGGGTA GGGGCAGGAG CCGGCCATAG GGGAGAAAGG GTATCGGCCA GACTCCACTT
841 ACATCTCACG TGTCCAAATT CAGGATGGAG GGGCCCTATA AATGCCCAGG GCCAGCCTCC
901 CCGGAGACCC TGAGAGAGAG ACAGACAGAC AGAGGGAGAG CAAGAGCTGC AAGCTCCCCA
961 CCCGAGACC CCTGGGCCAG CCCACGGAAG GCTCCGAGC ATGTGGGAAC TCCGTTCCAT
1021 AGCCTTCTCC AGGGCAGTGC TTGCAGAGTT CCTGGCCACA CTCTCTTTG TCTTCTTTGG
1081 CCTCGGCTCA GCCCTCAACT G

//
```

Fig. S1. Sequences of AQP2 5'-flanking regions from 5 species.

LOCUS GXP\_89332 1117 bp DNA  
DEFINITION loc=GXL\_74454|sym=Aqp2|geneid=11827|acc=GXP\_89332|  
taxid=10090|spec=Mus musculus|chr=15|ctg=NC\_000081|str=(+)|  
start=99406090|end=99407206|len=1117|tss=1001,1017|  
descr=aquaporin 2|  
comm=GXT\_12978455/AK002689/1251/gold;  
GXT\_13074328/NM\_009699/1267/bronze;  
GXT\_21805231/AK142567/1251/gold

ACCESSION GXP\_89332  
BASE COUNT 286 a 278 c 320 g 233 t  
ORIGIN

```

1 CACCAAGACT AGAGGTTACT AGCAGGCACC ATGGCCTCCT TGAGCCTGGA GAGCTAGCTG
61 CAACTCCAGA AACATCTTCC TCCTGTGGTA AGGGTGGCTC TGAGCTCGAG ATGGTATCTA
121 GAGCCTGTTG TAGCCTTGGA GACTCTGAGT TTGGGGGAGA CCTGTTTGCC TCAAATGCA
181 AATAGCACTG AGCAATAGCT GACAAAACCT GAGTTCTTCC TGAGAACCAG GAGCCATATT
241 AATGCAAATC TCTGTCCTAT GAGATAGTTT TATTATCTCA TGTACACAGG CAGAGCAGAA
301 CTGTCACATC TCAACGACAT GAGTGTGTGC TGCAGAACAG AAACCCTCAT GTTCCTAAGT
361 TGACCTTGGT GACTCTATCA CGCAGGGCTA GGTCCCAGG GCCACTGAAG CCACCTTTGG
421 CTCCAGGCAA TGGGAGTTCC TCTCTGGCTG AGATTCCCTGG GTGAAGGTGG AACATAATGA
481 CTTATGGGTG ATTAAGTGC AAGAAAGCAAG CCAAGACCT TTTGCCTTGG AAATTTGTCC
541 CAGGCCAGCC AGTTGTTTTT CATCCTCTTC CAGAAGAAAG ACCATCCAGT CCGCGGAAAG
601 GCAGCGCCCA CATTTCCTCA CAGTTTGGGG TAAGGCATTG CCCCTTCCTT GCCCAGCCTT
661 TTAGTCAAAG AGAAGGTCAC TGGACACAGC CTCCTCTGCA GGAAGTGGTG CTGGTGGTCA
721 TTGTGGGGGC TGGGGCAGCC CTGAGGCAGC TCCATGGGGT AACTGAGGAA AAAACGAGGA
781 AAACAGAGAC GTCAATCCTT ATCTGGAGTC CATTAAATGAG GAGAACATTA GTCAGCTGTG
841 AAAGCTAAGA TGGGGTGATA GGCCTTCGGG TGGGCAGGAG CAGGGATGGG GGCAAGTCCG
901 CCATGGGGGA GCACAGGGTT GGCAGGAACG CCTCCTCCAC CCCACGTGCC CAGGTCTACG
961 ATAGGAAGGC CCTATAAGTG CCCACAGTCT AGCCTCTCCG GAGGCCCAGA GGAAGAGAGA
1021 AGAGAAAGAG AGAGGGAGGG AGGAAGAGCC ACCCCCGTGG CCCAGACCAC TGGCCAGCGC
1081 TCAGAAGGCC GAGCAGCATG TGGGAACTCC GGTCCAT

```

//

LOCUS GXP\_241970 1101 bp DNA  
DEFINITION loc=GXL\_201711|sym=Aqp2|geneid=25386|acc=GXP\_241970|  
taxid=10116|spec=Rattus norvegicus|chr=7|ctg=NC\_005106|  
str=(+)|start=138324855|end=138325955|len=1101|tss=1001|  
descr=aquaporin 2|comm=GXT\_21770862/NM\_012909/1261/bronze

ACCESSION GXP\_241970  
BASE COUNT 284 a 269 c 323 g 225 t  
ORIGIN

```

1 AGGTAGGTCA GTCTTCTGAG GCTCCACAGC CACAGGAGCT GTGAGGGCAG GTGACCTTGT
61 AGAACACTGA CCAAGCTGAG TGGTCCCGCC ACCAGAAACA TCTTCCTCCT CTGAGCTCAA
121 AGATGGTACC TAGAGTCTGT TGTAGCCTCA GAGACTCTGA GTTTGGGGGA CAGGACCTAT
181 TTACCTCAAA ATGCAAATAG CACTGAGCAA TGACTGACAT AGTAACGCAG ATCTCTATCC
241 TACGAGATAG TTTTATTACC TCATCTATAG AGACAGAGCG GGGATGTCAC ATCTGGAGTG
301 CGTGCTGCAG AACAGAAGCC CTTGTGTTTC TTGTTGGCTC TGGATGACTC TACCACACAG
361 GGCTAGGGTC CCCGGGGGCC ACTGAAGCCA CCCTTGCTC CGGGCAATGG GAGTTACTCT
421 CTGGCTGGGG TTCTTGGGTG AAGGTGAAAC ATAATAACTT CTGGGTGATT AACTGCAAGA
481 AAGCAAGCAC AAGACCTTTG CCTTGGAAAT CTGTCCCAGG CCAATCAGTT GTTTTCCATC
541 CTCTTCCAGA AGAAAGACCG ACCATCCAGT CAGCGGAAAG GTAGTTCCCA CATTTCCTCA
601 CAGTTTGGGC TGAGGTGGTG CCCCTTCCTT GGCCAGCCTT TTAGTCGAAG AGAAGTCCAC
661 TGGACACGGT CTCCAATGCA GGAAGTGGAA CTGGTGGTCA CTCTGGGGGC TGGGGAAGCC
721 CTGGGGCAGC TCCCTGGAGT AACTGAGGAG AAAAAAATG AGGAAAACAG AGGACGTCAA
781 TCCTTATCTG GAGTTCATTA ACGAGGAGAA CATTTAGTCA GCTGTGGAAG CTAAGATGGG
841 ACGATAGGGC CTTCAGGTGG GCAGGAGCAT GGGTTGGGGC AAGGCCACCA CGGGAGAGCA
901 TGGTGTGGGC AGGAACGCCT CCTCCATACC ACGTGCCCAA GCCTACGATA GGAAGGTCTT
961 ATAAGTGCCC ACGGTCTAGC CTCCCAGAG GCCCAGAGGA AGAGAGAAGA GAAAGAGAGA
1021 GGGAGGGAGG AAGAGCCACC CCCGTGGCCC AGACCCCTGG CCAGCGCGCA GAAGTCCGGG

```

Fig. S1. (continued)

```

1081 CAGCATGTGG GAACTCAGAT C
//
LOCUS      GXP_71921      1106 bp      DNA
DEFINITION loc=GXL_59683|sym=AQP2|geneid=359|acc=GXP_71921|taxid=9606|
            spec=Homo sapiens|chr=12|ctg=NC_000012|str=(+)|
            start=48629791|end=48630896|len=1106|tss=1001,1006|
            descr=aquaporin 2 (collecting duct)|
            comm=GXT_2814311/NM_000486/1281/gold;
            GXT_22215291/AK225940/1276/gold
ACCESSION  GXP_71921
BASE COUNT 279 a 290 c 308 g 229 t
ORIGIN
    1 CAGAAATGTC TTTCTCCTGT GGCCAGAGCG GCCCTGAGCT CCTCAGGGTT TCTAGGACCT
    61 GTCACAGCTT CTGGGACCCC AACAAATGAG TGTGCAAAGA CCTGTTCTCC TCAAAAGTGCA
   121 AATAATACTG TAAGTAAGGG CTGATATTCA TTGACCACCT ACTGTGGACG AGGCGCTGCT
   181 CTGAGCACTT GACATACATT GTTTCATTCA ATCCAAACCC CAATCCACTA GGTCAGTTTT
   241 ATTCTCCCCA TTTTACAGAG AAAGACAAGA AAGGTTAAGT CACATAGATG GAACAGGCTG
   301 ATGCCAGAAT GGACACCCTC AGCTTCCTCA GCCGCCCCAG GTTGACTCCA TCACCAAGGG
   361 CCAGGGTCCC AGTGCCCCCA GGCTCTAGGA GCTGCTGTTT GGCTGGGGCT CCCAGGAGAA
   421 GGTGAAGCTT AATGATTTAT GGGTGATTAG CTGCAAGAAT GCAAGCACAG AAGACACAAA
   481 CCTTTATGCC TTGGAAATTT GTCACAAGCC AACCAGTTGT TTTCCATCCC TGTGAAGCAG
   541 GAATAAATTGG AGGTCTGACA GAAGAACTTC CCAGTTACCA GAAGGAGCAG CACTCATGTT
   601 CTCTCTTAGT TTTGTGTGAG GTGTTGCCCC TGCCTTGGTC AACAGTTTGA GTCAGAGAGA
   661 TGGGGGCCCG GCACAATCCC CACCAGACGT TCCCATTAC AAGACCCTGT GGGGGCTGGG
   721 AGACGCCCTG GGGCAGCAGC CCTGGGGTAA CCAAGGGAAC AAACACGGAA AACCAGGGAC
   781 GTCAGTCCTT ATCTGGAGCT CATTAAATGG GGAACATTAG TCAGCTGTGA AGGCCAAGAT
   841 AGGGTGATAG GCCTGTGGGT GGGCTGGGAT GGGGCATGGG GGCAGAGGCC GCCATGGAGG
   901 AGAAGAGGTA TTGGCCTCAA CGACTCCACC TCCCCGCCAC GTGCCAGAT CCGGGATGGA
   961 AGGACCCTAT AAATGCCCAC AACCCAGCCT CCCCAGAGGC CTTGAGAAAG AGAGCGATAG
  1021 AGTGCGAGAG CGAGTGCCCG GAGCATCCTG GCCCTGAGAC AGCTGGGCCA GCCCCGAGG
  1081 GCTCTGCAGC ATGTGGGAGC TCCGCT
//

```

Fig. S1. (continued)



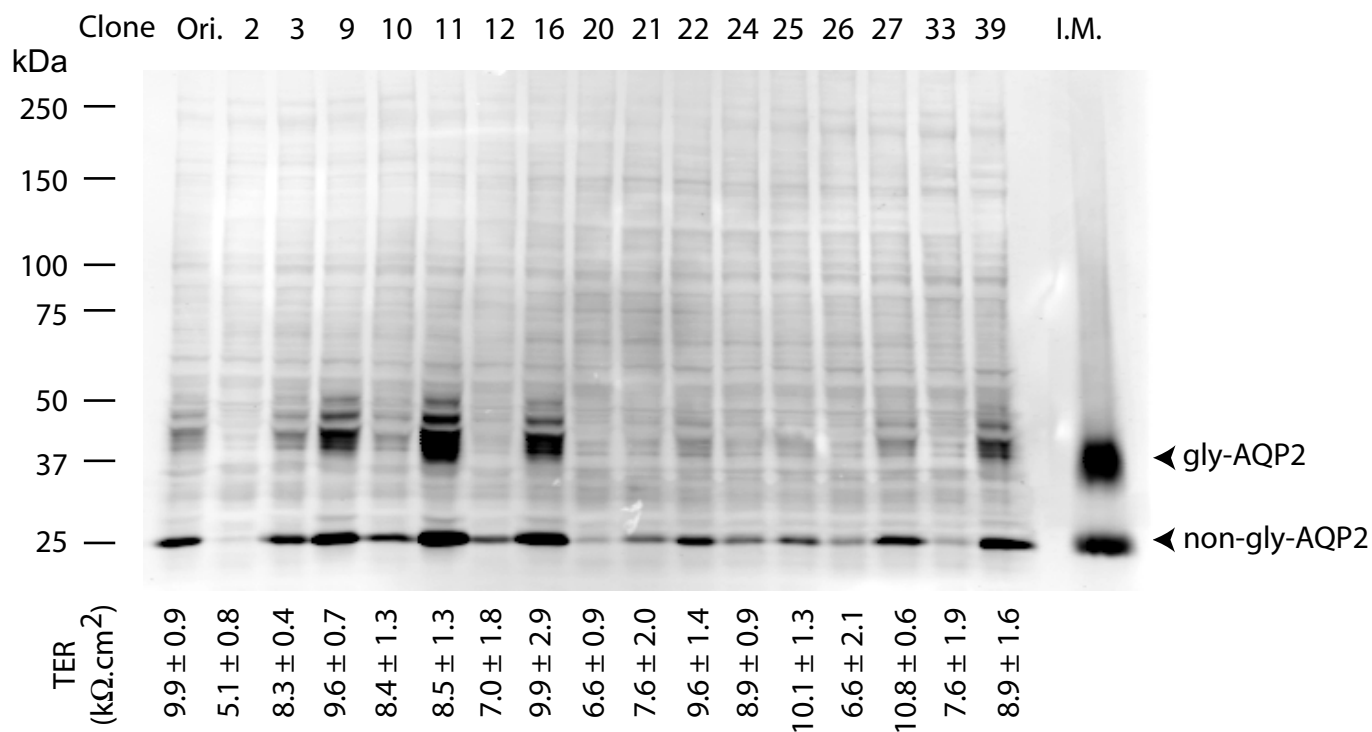

**Fig. S3.** AQP2 immunoblot illustrating *mpkCCD* cells with various AQP2 expression levels. The *mpkCCD<sub>cl4</sub>* cell clones (numbered plus the original cell [Ori.]) were grown on membrane support until confluence (transepithelial resistance [TER] > 5 kΩ.cm<sup>2</sup>). Cells were then exposed to 0.1 nM vasopressin analogy dDAVP added to the basolateral serum-free medium for 5 days. 10 μg of protein was tested for AQP2 expression using immunoblotting (N20 antibody from Santa Cruz Biotechnology). The average TER during the dDAVP exposure was shown as mean ± SE. Gly-AQP2 and non-gly-AQP2 indicate glycosylated and non-glycosylated AQP2 protein bands. I.M. is 10 μg protein sample from rat kidney inner medulla.

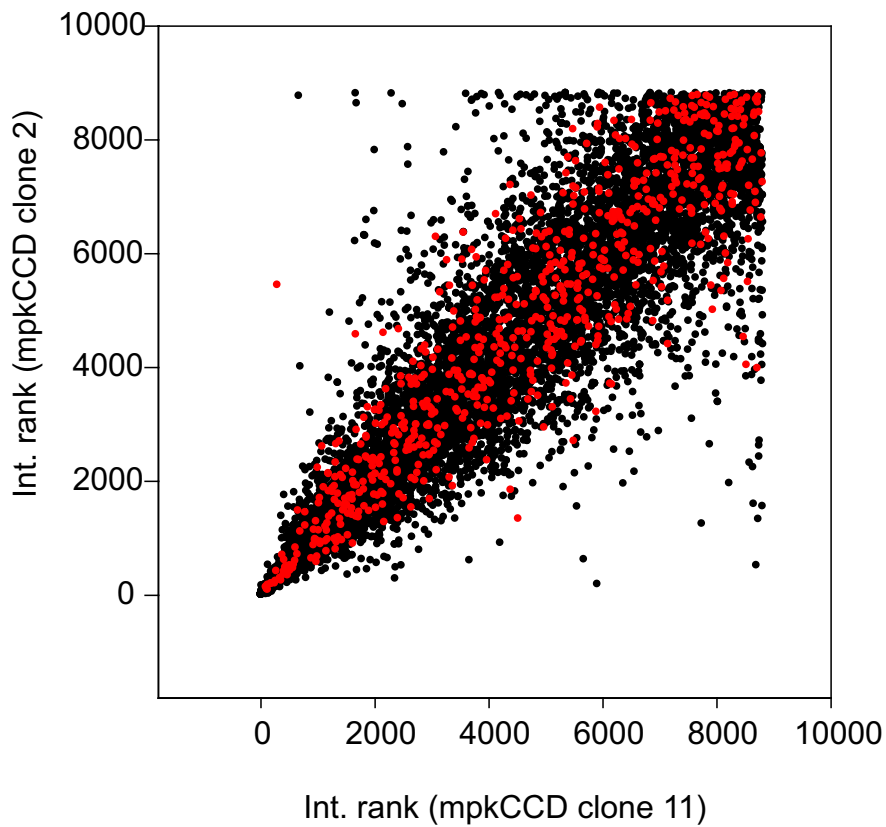

**Fig. S4.** A Scattergram comparing transcripts of *mpkCCD* clone 11 cells vs. clone 2 cells. Comparison was based on the rank of transcript intensity. Red dots indicate transcription factors and cofactors.

## Other Supporting Information Files

[Table S1 \(PDF\)](#)

[Table S2 \(PDF\)](#)

[Table S3 \(PDF\)](#)

[Table S4 \(PDF\)](#)

[Table S5 \(PDF\)](#)

[Table S6 \(XLS\)](#)
