# Supplementary material
Source: PubMed Central journal article supplement (PMC2650175)
Supplement: 0813002106_ST1_PDF.pdf [file 0813002106_ST1_PDF.pdf]

**Table S1. mpkCCD Cell Transcriptomes.**

| Gene Symbol   | Gene Title                                                                           | Ori.   |          |       |         | Ratio<br>(11/2) | Correlation<br>Coefficient |
|---------------|--------------------------------------------------------------------------------------|--------|----------|-------|---------|-----------------|----------------------------|
|               |                                                                                      | GeneID | Clone 11 | Clone | Clone 2 |                 |                            |
| Copg          | coatamer protein complex, subunit gamma                                              | 54161  | 1.99     | 1.81  | 2.48    | 0.80            | -0.49 ns                   |
| Atp6v0d1      | ATPase, H+ transporting, lysosomal V0 subunit D1                                     | 11972  | 3.37     | 2.87  | 3.00    | 1.12            | 0.74 ns                    |
| Golga7        | golgi autoantigen, golgin subfamily a, 7                                             | 57437  | 3.03     | 3.40  | 3.58    | 0.84            | -0.34 ns                   |
| Psph          | phosphoserine phosphatase                                                            | 100678 | 0.38     | 0.66  | 0.64    | 0.59            | -0.61 ns                   |
| Trappc4       | trafficking protein particle complex 4                                               | 60409  | 1.17     | 1.12  | 1.08    | 1.08            | 0.64 ns                    |
| Dpm2          | dolichol-phosphate (beta-D) mannosyltransferase 2                                    | 13481  | 0.74     | 0.87  | 0.81    | 0.91            | -0.31 ns                   |
| Psmb5         | proteasome (prosome, macropain) subunit, beta type 5                                 | 19173  | 2.92     | 3.00  | 2.92    | 0.99            | 0.32 ns                    |
| Dhrs1         | dehydrogenase/reductase (SDR family) member 1                                        | 52585  | 0.74     | 0.68  | 0.88    | 0.83            | -0.18 ns                   |
| Ppm1a         | protein phosphatase 1A, magnesium dependent, alpha isoform                           | 19042  | 2.43     | 2.60  | 2.96    | 0.82            | -0.53 ns                   |
| Psnen         | presenilin enhancer 2 homolog (C. elegans)                                           | 66340  | 2.52     | 2.88  | 3.80    | 0.66            | -0.77 ns                   |
| Anapc1        | anaphase promoting complex subunit 1                                                 | 17222  | 1.16     | 1.33  | 1.61    | 0.72            | -0.33 ns                   |
| Mrp143        | mitochondrial ribosomal protein L43                                                  | 94067  | 2.15     | 2.15  | 1.84    | 1.16            | 0.91 *                     |
| Nmt1          | N-myrystoyltransferase 1                                                             | 18107  | 3.21     | 2.71  | 3.36    | 0.95            | -0.31 ns                   |
| Atg5          | autophagy-related 5 (yeast)                                                          | 11793  | 0.70     | 0.73  | 0.66    | 1.05            | -0.23 ns                   |
| Mtif2         | mitochondrial translational initiation factor 2                                      | 76784  | 1.16     | 1.29  | 1.19    | 0.97            | -0.36 ns                   |
| Psap          | prosaposin                                                                           | 19156  | 8.07     | 7.25  | 8.37    | 0.96            | 0.02 ns                    |
| Ube2g1        | ubiquitin-conjugating enzyme E2G 1 (UBC7 homolog, C. elegans)                        | 67128  | 4.02     | 3.60  | 3.88    | 1.03            | -0.22 ns                   |
| Zkscan3       | zinc finger with KRAB and SCAN domains 3                                             | 72739  | 0.88     | 0.86  | 0.92    | 0.96            | 0.22 ns                    |
| Mrp127        | mitochondrial ribosomal protein L27                                                  | 94064  | 1.88     | 1.59  | 2.05    | 0.91            | -0.22 ns                   |
| Dlg1          | discs, large homolog 1 (Drosophila)                                                  | 13383  | 4.74     | 4.06  | 3.63    | 1.30            | 0.52 ns                    |
| Canx          | calnexin                                                                             | 12330  | 8.75     | 8.46  | 8.92    | 0.98            | -0.63 ns                   |
| Psma1         | proteasome (prosome, macropain) subunit, alpha type 1                                | 26440  | 3.18     | 3.02  | 4.04    | 0.78            | -0.67 ns                   |
| Sar1a         | SAR1 gene homolog A (S. cerevisiae)                                                  | 20224  | 2.69     | 2.17  | 1.88    | 1.43            | 0.88 *                     |
| Gps1          | G protein pathway suppressor 1                                                       | 209318 | 3.26     | 2.83  | 3.10    | 1.05            | 0.47 ns                    |
| Ctbp1         | C-terminal binding protein 1                                                         | 13016  | 3.99     | 4.83  | 5.02    | 0.79            | -0.69 ns                   |
| Huwe1         | HECT, UBA and WWE domain containing 1                                                | 59026  | 2.05     | 2.28  | 3.13    | 0.65            | -0.18 ns                   |
| Cdv3          | carnitine deficiency-associated gene expressed in ventricle 3                        | 321022 | 4.01     | 3.89  | 3.12    | 1.28            | 0.84 *                     |
| Copa          | coatamer protein complex subunit alpha                                               | 12847  | 3.95     | 3.57  | 3.27    | 1.20            | 0.80 ns                    |
| Anapc2        | anaphase promoting complex subunit 2                                                 | 99152  | 2.20     | 2.00  | 1.61    | 1.36            | 0.77 ns                    |
| Cox18         | COX18 cytochrome c oxidase assembly homolog (S. cerevisiae)                          | 231430 | 0.76     | 0.82  | 1.07    | 0.71            | -0.82 *                    |
| Arfgef1       | ADP-ribosylation factor guanine nucleotide-exchange factor 1 (brefeldin A-inhibited) | 211673 | 6.19     | 5.53  | 4.52    | 1.36            | 0.15 ns                    |
| Zranb1        | zinc finger, RAN-binding domain containing 1                                         | 360216 | 0.62     | 0.59  | 0.66    | 0.94            | -0.28 ns                   |
| Ddx24         | DEAD (Asp-Glu-Ala-Asp) box polypeptide 24                                            | 27225  | 1.06     | 0.89  | 0.98    | 1.07            | 0.48 ns                    |
| Tmem129       | transmembrane protein 129                                                            | 68366  | 0.38     | 0.53  | 0.61    | 0.61            | -0.94 **                   |
| Rps27         | ribosomal protein S27                                                                | 57294  | 21.87    | 20.97 | 15.03   | 1.45            | 0.71 ns                    |
| Sap30l        | SAP30-like                                                                           | 50724  | 1.13     | 1.20  | 1.77    | 0.64            | -0.54 ns                   |
| Mad2l1bp      | MAD2L1 binding protein                                                               | 66591  | 0.76     | 0.75  | 0.52    | 1.46            | 0.92 **                    |
| Vta1          | Vps20-associated 1 homolog (S. cerevisiae)                                           | 66201  | 1.72     | 1.50  | 1.69    | 1.01            | -0.30 ns                   |
| Eif5          | eukaryotic translation initiation factor 5                                           | 217869 | 7.61     | 7.15  | 7.25    | 1.04            | 0.19 ns                    |
| Rrm3          | RRN3 RNA polymerase I transcription factor homolog (yeast)                           | 106298 | 0.69     | 0.72  | 0.94    | 0.73            | -0.92 *                    |
| Apoa1bp       | apolipoprotein A-1 binding protein                                                   | 246703 | 3.97     | 4.27  | 3.45    | 1.14            | 0.40 ns                    |
| Pdpk1         | 3-phosphoinositide dependent protein kinase-1                                        | 18607  | 2.48     | 2.14  | 1.53    | 1.62            | 0.92 **                    |
| 573045316Rik  | RIKEN cDNA 573045316 gene                                                            | 269061 | 2.48     | 2.62  | 2.08    | 1.19            | 0.78 ns                    |
| Bat5          | HLA-B associated transcript 5                                                        | 193742 | 1.01     | 0.75  | 0.54    | 1.86            | 0.92 **                    |
| Rab7          | RAB7, member RAS oncogene family                                                     | 19349  | 4.25     | 4.78  | 4.91    | 0.86            | -0.46 ns                   |
| Ddb1          | damage specific DNA binding protein 1                                                | 13194  | 5.39     | 5.93  | 4.75    | 1.13            | 0.72 ns                    |
| Txndc12       | thioredoxin domain containing 12 (endoplasmic reticulum)                             | 66073  | 1.53     | 1.59  | 1.93    | 0.79            | -0.41 ns                   |
| Psmc5         | protease (prosome, macropain) 26S subunit, ATPase 5                                  | 19184  | 2.80     | 2.42  | 2.30    | 1.21            | 0.70 ns                    |
| Tmem165       | transmembrane protein 165                                                            | 21982  | 3.13     | 3.10  | 3.66    | 0.85            | -0.84 *                    |
| Aup1          | ancient ubiquitous protein                                                           | 11993  | 1.06     | 1.07  | 1.00    | 1.05            | -0.08 ns                   |
| Hdac5         | histone deacetylase 5                                                                | 15184  | 0.62     | 0.56  | 0.95    | 0.65            | -0.24 ns                   |
| H2-Ke2        | H2-K region expressed gene 2                                                         | 14976  | 2.51     | 2.55  | 1.94    | 1.28            | 0.87 *                     |
| Dscr3         | Down syndrome critical region gene 3                                                 | 13185  | 1.27     | 1.12  | 1.46    | 0.87            | -0.37 ns                   |
| Cic           | capicua homolog (Drosophila)                                                         | 71722  | 0.70     | 0.82  | 1.00    | 0.69            | -0.71 ns                   |
| RioK3         | RIO kinase 3 (yeast)                                                                 | 66878  | 1.35     | 1.33  | 1.45    | 0.93            | 0.29 ns                    |
| Dctn5         | dynactin 5                                                                           | 59288  | 0.91     | 0.86  | 1.13    | 0.80            | -0.71 ns                   |
| Rragc         | Ras-related GTP binding C                                                            | 54170  | 1.56     | 1.52  | 1.48    | 1.05            | -0.22 ns                   |
| Tbl3          | transducin (beta)-like 3                                                             | 213773 | 0.62     | 0.70  | 0.51    | 1.21            | 0.72 ns                    |
| Hp1bp3        | heterochromatin protein 1, binding protein 3                                         | 15441  | 2.20     | 2.25  | 2.56    | 0.86            | -0.29 ns                   |
| BC031181      | cDNA sequence BC031181                                                               | 407819 | 1.49     | 1.70  | 1.66    | 0.89            | -0.02 ns                   |
| Polr2f        | polymerase (RNA) II (DNA directed) polypeptide F                                     | 69833  | 2.21     | 2.45  | 2.86    | 0.77            | -0.48 ns                   |
| Gbf1          | golgi-specific brefeldin A-resistance factor 1                                       | 107338 | 0.89     | 0.90  | 0.76    | 1.17            | 0.18 ns                    |
| Fryl          | furry homolog-like (Drosophila)                                                      | 72313  | 1.28     | 1.07  | 1.19    | 1.07            | -0.04 ns                   |
| Atox1         | ATX1 (antioxidant protein 1) homolog 1 (yeast)                                       | 11927  | 1.44     | 1.66  | 2.33    | 0.61            | -0.62 ns                   |
| 2510006D16Rik | RIKEN cDNA 2510006D16 gene                                                           | 76799  | 1.55     | 1.57  | 1.58    | 0.97            | 0.25 ns                    |
| Zc3h11a       | zinc finger CCH type containing 11A                                                  | 70579  | 6.72     | 6.04  | 6.02    | 1.11            | 0.83 *                     |
| Ube2r2        | ubiquitin-conjugating enzyme E2R 2                                                   | 67615  | 1.62     | 1.50  | 1.57    | 1.03            | 0.02 ns                    |
| Itch          | itchy, E3 ubiquitin protein ligase                                                   | 16396  | 1.93     | 1.89  | 2.32    | 0.83            | -0.39 ns                   |
| Ncl           | nucleolin                                                                            | 17975  | 9.80     | 11.07 | 7.21    | 1.35            | 0.63 ns                    |
| Aldh3a2       | aldehyde dehydrogenase family 3, subfamily A2                                        | 11671  | 0.41     | 0.36  | 0.47    | 0.87            | -0.26 ns                   |
| Actg1         | actin, gamma, cytoplasmic 1                                                          | 11465  | 25.73    | 24.15 | 21.65   | 1.18            | 0.72 ns                    |
| LOC672381     |                                                                                      | 672381 | 21.93    | 20.28 | 18.54   | 1.18            | 0.96 **                    |
| LOC675440     |                                                                                      | 675440 | 21.93    | 20.28 | 18.54   | 1.18            | 0.96 **                    |
| Sumo2         |                                                                                      | 170930 | 21.93    | 20.28 | 18.54   | 1.18            | 0.96 **                    |
| Vps35         | vacuolar protein sorting 35                                                          | 65114  | 6.87     | 6.05  | 6.64    | 1.03            | 0.45 ns                    |
| Cct8          | chaperonin subunit 8 (theta)                                                         | 12469  | 4.12     | 3.97  | 4.91    | 0.84            | -0.77 ns                   |
| Ganab         | alpha glucosidase 2 alpha neutral subunit                                            | 14376  | 1.97     | 2.24  | 2.10    | 0.93            | -0.67 ns                   |
| Ublcp1        | ubiquitin-like domain containing CTD phosphatase 1                                   | 79560  | 1.00     | 1.11  | 1.19    | 0.84            | -0.40 ns                   |
| Rnf34         | ring finger protein 34                                                               | 80751  | 0.79     | 0.87  | 0.72    | 1.10            | 0.01 ns                    |
| Rbck1         | RanBP-type and C3HC4-type zinc finger containing 1                                   | 24105  | 1.11     | 1.10  | 1.24    | 0.90            | -0.50 ns                   |

|           |                                                                                                                                      |        |       |       |       |      |          |
|-----------|--------------------------------------------------------------------------------------------------------------------------------------|--------|-------|-------|-------|------|----------|
| Pnpo      | pyridoxine 5'-phosphate oxidase                                                                                                      | 103711 | 0.39  | 0.40  | 0.41  | 0.93 | -0.44 ns |
| Dazap2    | DAZ associated protein 2                                                                                                             | 23994  | 7.50  | 7.47  | 8.84  | 0.84 | -0.76 ns |
| Wbp11     | WW domain binding protein 11                                                                                                         | 60321  | 1.67  | 1.73  | 2.04  | 0.81 | -0.85 *  |
| Slc16a1   | solute carrier family 16 (monocarboxylic acid transporters), member 1                                                                | 20501  | 6.17  | 6.01  | 4.84  | 1.27 | 0.26 ns  |
| Cx3cl1    | chemokine (C-X3-C motif) ligand 1                                                                                                    | 20312  | 0.57  | 0.52  | 0.63  | 0.91 | -0.58 ns |
| Plat      | plasminogen activator, tissue                                                                                                        | 18791  | 0.08  | 0.15  | 0.52  | 0.16 | -0.89 *  |
| Uhrf1     | ubiquitin-like, containing PHD and RING finger domains, 1                                                                            | 18140  | 5.40  | 5.35  | 4.14  | 1.30 | 0.88 *   |
| Atp6v1b2  | ATPase, H+ transporting, lysosomal V1 subunit B2                                                                                     | 11966  | 1.52  | 1.47  | 1.43  | 1.06 | 0.39 ns  |
| Cct7      | chaperonin subunit 7 (eta)                                                                                                           | 12468  | 5.26  | 6.19  | 6.55  | 0.80 | -0.15 ns |
| Anxa6     | annexin A6                                                                                                                           | 11749  | 1.37  | 1.29  | 1.51  | 0.91 | 0.30 ns  |
| Nptn      | neuroplastin                                                                                                                         | 20320  | 4.51  | 3.53  | 3.51  | 1.28 | 0.83 *   |
| Scd2      | stearoyl-Coenzyme A desaturase 2                                                                                                     | 20250  | 20.29 | 18.95 | 15.63 | 1.29 | 0.39 ns  |
| Atp6v1h   | ATPase, H+ transporting, lysosomal V1 subunit H                                                                                      | 108664 | 1.30  | 1.41  | 1.28  | 1.01 | -0.42 ns |
| Lbr       | lamin B receptor                                                                                                                     | 98386  | 3.08  | 3.89  | 3.39  | 0.91 | 0.30 ns  |
| Orc5l     | origin recognition complex, subunit 5-like (S. cerevisiae)                                                                           | 26429  | 0.73  | 0.72  | 0.96  | 0.75 | -0.90 *  |
| Psmc2     | proteasome (prosome, macropain) 26S subunit, non-ATPase, 2                                                                           | 21762  | 6.17  | 5.86  | 6.79  | 0.90 | -0.02 ns |
| Dusp6     | dual specificity phosphatase 6                                                                                                       | 67603  | 0.94  | 1.27  | 2.32  | 0.40 | -0.88 *  |
| Npm1      | nucleophosmin 1                                                                                                                      | 18148  | 14.18 | 14.21 | 13.99 | 1.01 | -0.01 ns |
| Elov15    | ELOVL family member 5, elongation of long chain fatty acids (yeast)                                                                  | 68801  | 2.11  | 2.34  | 2.02  | 1.04 | 0.59 ns  |
| Dync1i2   | dynein cytoplasmic 1 intermediate chain 2                                                                                            | 13427  | 2.79  | 2.50  | 2.48  | 1.12 | -0.03 ns |
| Gbl       | G protein beta subunit-like                                                                                                          | 56716  | 0.40  | 0.35  | 0.29  | 1.37 | 0.65 ns  |
| Strn1     | stathmin 1                                                                                                                           | 16765  | 15.57 | 15.96 | 15.02 | 1.03 | 0.68 ns  |
| Impdh2    | inosine 5'-phosphate dehydrogenase 2                                                                                                 | 23918  | 4.34  | 4.78  | 3.65  | 1.19 | 0.72 ns  |
| Kpna2     |                                                                                                                                      | 16647  | 6.88  | 7.59  | 8.26  | 0.83 | 0.08 ns  |
| Bpgm      | 2,3-bisphosphoglycerate mutase                                                                                                       | 12183  | 0.22  | 0.30  | 0.43  | 0.51 | -0.60 ns |
| Calu      | calumenin                                                                                                                            | 12321  | 3.84  | 3.68  | 4.11  | 0.93 | 0.10 ns  |
| Actr1a    | ARP1 actin-related protein 1 homolog A (yeast)                                                                                       | 54130  | 2.18  | 2.49  | 2.18  | 0.99 | 0.45 ns  |
| Spry1     | sprouty homolog 1 (Drosophila)                                                                                                       | 24063  | 1.54  | 1.62  | 1.05  | 1.46 | 0.01 ns  |
| Rps26     | ribosomal protein S26                                                                                                                | 27370  | 18.02 | 17.21 | 13.20 | 1.36 | 0.74 ns  |
| Rrm1      | ribonucleotide reductase M1                                                                                                          | 20133  | 2.78  | 3.20  | 3.64  | 0.76 | -0.80 ns |
| Rplp2     | ribosomal protein, large P2                                                                                                          | 67186  | 26.72 | 22.69 | 21.33 | 1.25 | 0.68 ns  |
| Lamp1     | lysosomal-associated membrane protein 1                                                                                              | 16783  | 7.95  | 8.58  | 8.59  | 0.92 | 0.27 ns  |
| Ghitm     | growth hormone inducible transmembrane protein                                                                                       | 66092  | 4.30  | 3.98  | 4.22  | 1.01 | -0.44 ns |
| Tfg       | Trk-fused gene                                                                                                                       | 21787  | 4.27  | 3.62  | 4.32  | 0.98 | -0.13 ns |
| Hdgf      | hepatoma-derived growth factor                                                                                                       | 15191  | 5.85  | 6.19  | 5.01  | 1.16 | 0.50 ns  |
| Hsp90b1   | heat shock protein 90kDa beta (Grp94), member 1                                                                                      | 22027  | 6.62  | 7.73  | 6.75  | 0.98 | -0.31 ns |
| Papss1    | 3'-phosphoadenosine 5'-phosphosulfate synthase 1                                                                                     | 23971  | 3.92  | 3.81  | 3.18  | 1.23 | 0.15 ns  |
| Suclg1    | succinate-CoA ligase, GDP-forming, alpha subunit                                                                                     | 56451  | 1.76  | 1.75  | 2.16  | 0.81 | -0.73 ns |
| Sgpl1     | sphingosine phosphate lyase 1                                                                                                        | 20397  | 1.02  | 1.05  | 0.69  | 1.46 | 0.33 ns  |
| Mgst1     | microsomal glutathione S-transferase 1                                                                                               | 56615  | 0.39  | 1.64  | 3.15  | 0.12 | -0.95 ** |
| Junb      | Jun-B oncogene                                                                                                                       | 16477  | 1.22  | 1.25  | 0.86  | 1.42 | 0.90 *   |
| Plod3     | procollagen-lysine, 2-oxoglutarate 5-dioxygenase 3                                                                                   | 26433  | 0.92  | 0.89  | 0.99  | 0.93 | -0.13 ns |
| Tmsb4x    | thymosin, beta 4, X chromosome                                                                                                       | 19241  | 9.58  | 11.12 | 14.10 | 0.68 | -0.22 ns |
| Ccnd3     | cyclin D3                                                                                                                            | 12445  | 1.01  | 0.88  | 0.72  | 1.39 | 0.86 *   |
| Tspyl1    | testis-specific protein, Y-encoded-like 1                                                                                            | 22110  | 1.47  | 1.33  | 1.42  | 1.03 | -0.31 ns |
| Stip1     | stress-induced phosphoprotein 1                                                                                                      | 20867  | 2.91  | 2.65  | 2.64  | 1.10 | 0.69 ns  |
| Ciapin1   | cytokine induced apoptosis inhibitor 1                                                                                               | 109006 | 0.96  | 0.80  | 1.06  | 0.90 | 0.12 ns  |
| Ddx1      | DEAD (Asp-Glu-Ala-Asp) box polypeptide 1                                                                                             | 104721 | 4.83  | 4.94  | 5.57  | 0.86 | -0.07 ns |
| Mthfd1    | methylenetetrahydrofolate dehydrogenase (NADP+ dependent), methylenetetrahydrofolate cyclohydrolase, formyltetrahydrofolate synthase | 108156 | 2.51  | 2.22  | 2.11  | 1.18 | 0.24 ns  |
| Tpi1      | triosephosphate isomerase 1                                                                                                          | 21991  | 19.52 | 18.83 | 21.93 | 0.89 | -0.10 ns |
| Npdc1     | neural proliferation, differentiation and control gene 1                                                                             | 18146  | 1.01  | 1.07  | 0.85  | 1.18 | -0.09 ns |
| Cstf2t    | cleavage stimulation factor, 3' pre-RNA subunit 2, tau                                                                               | 83410  | 5.52  | 5.92  | 3.30  | 1.66 | 0.51 ns  |
| Map1lc3b  | microtubule-associated protein 1 light chain 3 beta                                                                                  | 67443  | 4.56  | 4.31  | 2.88  | 1.58 | 0.75 ns  |
| Cox5a     | cytochrome c oxidase, subunit Va                                                                                                     | 12858  | 7.91  | 6.81  | 7.45  | 1.06 | 0.38 ns  |
| Cops8     | COP9 (constitutive photomorphogenic) homolog, subunit 8 (Arabidopsis thaliana)                                                       | 108679 | 1.06  | 1.14  | 0.78  | 1.35 | 0.80 ns  |
| Bcar3     | breast cancer anti-estrogen resistance 3                                                                                             | 29815  | 0.94  | 1.22  | 0.98  | 0.95 | -0.36 ns |
| Zfand2a   | zinc finger, AN1-type domain 2A                                                                                                      | 100494 | 0.82  | 0.92  | 1.44  | 0.57 | -0.57 ns |
| EG234703  |                                                                                                                                      | 234703 | 16.62 | 14.95 | 15.24 | 1.08 | 0.66 ns  |
| LOC638133 |                                                                                                                                      | 638133 | 16.62 | 14.95 | 15.24 | 1.08 | 0.66 ns  |
| Cpe       | carboxypeptidase E                                                                                                                   | 12876  | 4.65  | 4.69  | 1.91  | 2.42 | -0.02 ns |
| Mark2     | MAP/microtubule affinity-regulating kinase 2                                                                                         | 13728  | 2.84  | 2.56  | 1.75  | 1.61 | 0.88 *   |
| Itm2c     | integral membrane protein 2C                                                                                                         | 64294  | 2.19  | 2.12  | 1.63  | 1.34 | 0.03 ns  |
| Scd1      | stearoyl-Coenzyme A desaturase 1                                                                                                     | 20249  | 3.17  | 1.90  | 0.82  | 3.84 | 0.93 **  |
| Ndufv1    | NADH dehydrogenase (ubiquinone) flavoprotein 1                                                                                       | 17995  | 5.72  | 4.89  | 3.89  | 1.46 | 0.97 **  |
| Cox6c     | cytochrome c oxidase, subunit VIc                                                                                                    | 12864  | 9.88  | 8.92  | 10.65 | 0.92 | -0.19 ns |
| Marcks    | myristoylated alanine rich protein kinase C substrate                                                                                | 17118  | 1.69  | 1.50  | 0.80  | 2.08 | 0.15 ns  |
| Map2k2    | mitogen activated protein kinase kinase 2                                                                                            | 26396  | 1.35  | 1.45  | 1.39  | 0.97 | -0.53 ns |
| Carhsp1   | calcium regulated heat stable protein 1                                                                                              | 52502  | 1.84  | 1.70  | 1.97  | 0.93 | -0.65 ns |
| Isyna1    | myo-inositol 1-phosphate synthase A1                                                                                                 | 71780  | 1.45  | 1.27  | 1.01  | 1.43 | 0.28 ns  |
| Rpl7      | ribosomal protein L7                                                                                                                 | 19989  | 21.71 | 20.59 | 15.57 | 1.39 | 0.73 ns  |
| Atp5g2    | ATP synthase, H+ transporting, mitochondrial F0 complex, subunit c (subunit 9), isoform 2                                            | 67942  | 9.92  | 9.02  | 9.01  | 1.10 | 0.03 ns  |
| Herpud2   | HERPUD family member 2                                                                                                               | 80517  | 1.00  | 0.79  | 0.75  | 1.34 | 0.83 *   |
| Acadm     | acyl-Coenzyme A dehydrogenase, medium chain                                                                                          | 11364  | 2.78  | 2.51  | 1.48  | 1.87 | 0.29 ns  |
| Sf3b3     | splicing factor 3b, subunit 3                                                                                                        | 101943 | 3.02  | 3.21  | 2.61  | 1.15 | 0.50 ns  |
| Clcn4-2   | chloride channel 4-2                                                                                                                 | 12727  | 0.72  | 0.80  | 0.89  | 0.81 | -0.70 ns |
| Vdac2     | voltage-dependent anion channel 2                                                                                                    | 22334  | 7.38  | 6.67  | 5.61  | 1.31 | 0.49 ns  |
| Klhd3     | kelch domain containing 3                                                                                                            | 71765  | 3.58  | 3.03  | 2.96  | 1.20 | 0.82 *   |
| Sqle      | squalene epoxidase                                                                                                                   | 20775  | 2.82  | 2.11  | 2.78  | 1.01 | 0.05 ns  |
| Casp6     | caspase 6                                                                                                                            | 12368  | 0.65  | 0.56  | 0.64  | 1.02 | -0.47 ns |
| Txnip     | thioredoxin interacting protein                                                                                                      | 56338  | 10.34 | 8.11  | 9.45  | 1.09 | 0.11 ns  |
| Ywhah     | tyrosine 3-monooxygenase/tryptophan 5-monooxygenase activation protein, eta polypeptide                                              | 22629  | 5.48  | 5.48  | 6.15  | 0.89 | 0.13 ns  |
| Psmc1     | protease (prosome, macropain) 26S subunit, ATPase 1                                                                                  | 19179  | 2.37  | 2.87  | 3.28  | 0.72 | -0.80 ns |
| Tspan3    | tetraspanin 3                                                                                                                        | 56434  | 2.03  | 1.71  | 1.72  | 1.18 | 0.77 ns  |

|               |                                                                                                   |        |       |       |       |      |          |
|---------------|---------------------------------------------------------------------------------------------------|--------|-------|-------|-------|------|----------|
| Ehd1          | EH-domain containing 1                                                                            | 13660  | 1.05  | 1.12  | 1.00  | 1.04 | 0.58 ns  |
| Pld3          | phospholipase D family, member 3                                                                  | 18807  | 0.73  | 0.78  | 0.72  | 1.00 | 0.18 ns  |
| Abce1         | ATP-binding cassette, sub-family E (OABP), member 1                                               | 24015  | 1.84  | 1.90  | 1.94  | 0.94 | 0.34 ns  |
| Dr1           | down-regulator of transcription 1                                                                 | 13486  | 0.87  | 0.91  | 1.20  | 0.72 | -0.88 *  |
| Atp5g1        | ATP synthase, H+ transporting, mitochondrial F0 complex, subunit c (subunit 9), isoform 1         | 11951  | 2.58  | 2.18  | 2.11  | 1.22 | 0.02 ns  |
| Cct3          | chaperonin subunit 3 (gamma)                                                                      | 12462  | 7.96  | 8.65  | 6.77  | 1.17 | 0.13 ns  |
| Pdcd6         | programmed cell death 6                                                                           | 18570  | 2.08  | 2.93  | 3.69  | 0.56 | -0.89 *  |
| Klf10         | Kruppel-like factor 10                                                                            | 21847  | 0.97  | 1.08  | 1.38  | 0.70 | -0.29 ns |
| Snd1          | staphylococcal nuclease and tudor domain containing 1                                             | 56463  | 1.83  | 1.51  | 1.49  | 1.22 | 0.71 ns  |
| Cyr61         | cysteine rich protein 61                                                                          | 16007  | 3.76  | 5.37  | 4.08  | 0.92 | -0.38 ns |
| Nasp          | nuclear autoantigenic sperm protein (histone-binding)                                             | 50927  | 1.71  | 1.70  | 1.99  | 0.86 | -0.63 ns |
| Flii          | flightless I homolog (Drosophila)                                                                 | 14248  | 1.83  | 1.89  | 2.27  | 0.80 | -0.46 ns |
| Smrbc1        | SWI/SNF related, matrix associated, actin dependent regulator of chromatin, subfamily b, member 1 | 20587  | 1.64  | 1.56  | 1.22  | 1.33 | 0.51 ns  |
| Fuca2         | fucosidase, alpha-L-2, plasma                                                                     | 66848  | 1.34  | 1.38  | 1.25  | 1.07 | -0.48 ns |
| Scarb1        | scavenger receptor class B, member 1                                                              | 20778  | 0.73  | 0.78  | 1.00  | 0.73 | -0.83 *  |
| Rps5          | ribosomal protein S5                                                                              | 20103  | 17.38 | 15.13 | 13.56 | 1.28 | 0.38 ns  |
| Ndufb11       | NADH dehydrogenase (ubiquinone) 1 beta subcomplex, 11                                             | 104130 | 4.13  | 4.22  | 6.08  | 0.68 | -0.50 ns |
| Atp5c1        | ATP synthase, H+ transporting, mitochondrial F1 complex, gamma polypeptide 1                      | 11949  | 9.88  | 7.95  | 6.28  | 1.57 | 0.94 **  |
| Sec23b        | SEC23B (S. cerevisiae)                                                                            | 27054  | 2.48  | 2.61  | 2.31  | 1.07 | 0.00 ns  |
| Tbc1d15       | TBC1 domain family, member 15                                                                     | 66687  | 3.10  | 2.74  | 2.47  | 1.25 | 0.42 ns  |
| Hspa5         | heat shock 70kD protein 5 (glucose-regulated protein)                                             | 14828  | 10.31 | 9.99  | 6.80  | 1.51 | 0.91 *   |
| Ankrd10       | ankyrin repeat domain 10                                                                          | 102334 | 1.76  | 2.01  | 2.26  | 0.77 | -0.59 ns |
| Cd9           | CD9 antigen                                                                                       | 12527  | 5.43  | 5.03  | 8.01  | 0.68 | -0.48 ns |
| Ifrd1         | interferon-related developmental regulator 1                                                      | 15982  | 2.07  | 2.79  | 3.63  | 0.57 | -0.52 ns |
| Kars          |                                                                                                   | 85305  | 2.44  | 2.32  | 1.83  | 1.33 | 0.68 ns  |
| LOC631033     |                                                                                                   | 631033 | 2.44  | 2.32  | 1.83  | 1.33 | 0.68 ns  |
| Pfkf          | phosphofructokinase, platelet                                                                     | 56421  | 4.46  | 4.43  | 7.08  | 0.63 | -0.22 ns |
| Ddx18         | DEAD (Asp-Glu-Ala-Asp) box polypeptide 18                                                         | 66942  | 1.11  | 1.05  | 0.79  | 1.41 | 0.28 ns  |
| Nup85         | nucleoporin 85                                                                                    | 445007 | 1.83  | 1.86  | 1.85  | 0.98 | 0.52 ns  |
| Rpl28         | ribosomal protein L28                                                                             | 19943  | 22.90 | 21.40 | 18.34 | 1.24 | 0.20 ns  |
| EG434175      |                                                                                                   | 434175 | 1.18  | 1.54  | 2.09  | 0.56 | -0.61 ns |
| Arpc1a        | actin related protein 2/3 complex, subunit 1A                                                     | 56443  | 1.45  | 1.11  | 1.61  | 0.89 | -0.34 ns |
| Rab1          | RAB1, member RAS oncogene family                                                                  | 19324  | 7.83  | 7.22  | 10.20 | 0.76 | -0.82 *  |
| Zfand5        | zinc finger, AN1-type domain 5                                                                    | 22682  | 5.47  | 6.10  | 4.56  | 1.19 | 0.53 ns  |
| Tpst2         | protein-tyrosine sulfotransferase 2                                                               | 22022  | 0.57  | 0.65  | 0.58  | 0.98 | -0.34 ns |
| Ap1s1         | adaptor protein complex AP-1, sigma 1                                                             | 11769  | 1.24  | 1.31  | 1.45  | 0.85 | -0.39 ns |
| Rps15         | ribosomal protein S15                                                                             | 20054  | 21.98 | 19.42 | 15.03 | 1.46 | 0.84 *   |
| Pdhb          | pyruvate dehydrogenase (lipoamide) beta                                                           | 68263  | 3.00  | 2.65  | 2.48  | 1.20 | 0.49 ns  |
| Mtap4         | microtubule-associated protein 4                                                                  | 17758  | 0.51  | 0.58  | 0.76  | 0.66 | 0.00 ns  |
| Mrp120        | mitochondrial ribosomal protein L20                                                               | 66448  | 0.72  | 0.78  | 1.00  | 0.72 | -0.37 ns |
| Adam9         | a disintegrin and metalloproteinase domain 9 (meltrin gamma)                                      | 11502  | 2.28  | 2.42  | 2.39  | 0.95 | -0.16 ns |
| 1110005A23Rik | RIKEN cDNA 1110005A23 gene                                                                        | 66118  | 3.10  | 3.10  | 2.84  | 1.09 | 0.47 ns  |
| EG621100      |                                                                                                   | 621100 | 17.59 | 16.09 | 14.78 | 1.18 | 0.89 *   |
| Rpl27         |                                                                                                   | 19942  | 17.59 | 16.09 | 14.78 | 1.18 | 0.89 *   |
| Hist1h1c      | histone cluster 1, H1c                                                                            | 50708  | 2.88  | 1.75  | 1.53  | 1.87 | 0.73 ns  |
| Mpdu1         | mannose-P-dolichol utilization defect 1                                                           | 24070  | 0.46  | 0.59  | 0.91  | 0.50 | -0.83 *  |
| Nnt           | nicotinamide nucleotide transhydrogenase                                                          | 18115  | 0.94  | 1.03  | 1.07  | 0.87 | -0.87 *  |
| Kti12         | KTI12 homolog, chromatin associated (S. cerevisiae)                                               | 100087 | 0.51  | 0.46  | 0.49  | 1.04 | 0.21 ns  |
| Tmed3         | transmembrane emp24 domain containing 3                                                           | 66111  | 0.83  | 0.95  | 1.21  | 0.68 | -0.44 ns |
| Fuca1         | fucosidase, alpha-L-1, tissue                                                                     | 71665  | 0.93  | 1.17  | 1.56  | 0.60 | -0.79 ns |
| Slc35a4       | solute carrier family 35, member A4                                                               | 67843  | 0.68  | 0.80  | 0.81  | 0.84 | -0.08 ns |
| Cox8a         | cytochrome c oxidase, subunit VIIIa                                                               | 12868  | 6.15  | 5.13  | 4.09  | 1.50 | 0.57 ns  |
| Fkbp8         | FK506 binding protein 8                                                                           | 14232  | 1.64  | 1.34  | 2.06  | 0.79 | 0.12 ns  |
| Orc3l         | origin recognition complex, subunit 3-like (S. cerevisiae)                                        | 50793  | 0.32  | 0.28  | 0.50  | 0.64 | -0.51 ns |
| LOC630539     | similar to mouse RING finger 1                                                                    | 630539 | 4.05  | 3.92  | 3.72  | 1.08 | -0.17 ns |
| Txn1          | thioredoxin 1                                                                                     | 22166  | 9.80  | 9.36  | 10.56 | 0.92 | -0.30 ns |
| Fkbp5         | FK506 binding protein 5                                                                           | 14229  | 1.15  | 1.32  | 1.03  | 1.11 | 0.54 ns  |
| Dnpep         | aspartyl aminopeptidase                                                                           | 13437  | 2.31  | 2.24  | 1.61  | 1.43 | 0.23 ns  |
| Errfi1        | ERBB receptor feedback inhibitor 1                                                                | 74155  | 1.88  | 1.72  | 2.09  | 0.90 | -0.58 ns |
| Anxa7         | annexin A7                                                                                        | 11750  | 2.98  | 2.86  | 2.95  | 1.00 | 0.54 ns  |
| Dhx30         | DEAH (Asp-Glu-Ala-His) box polypeptide 30                                                         | 72831  | 1.35  | 1.26  | 1.28  | 1.05 | 0.62 ns  |
| EG666577      |                                                                                                   | 666577 | 25.77 | 23.82 | 20.47 | 1.25 | 0.95 **  |
| LOC667739     |                                                                                                   | 667739 | 25.77 | 23.82 | 20.47 | 1.25 | 0.95 **  |
| Rps6          |                                                                                                   | 20104  | 25.77 | 23.82 | 20.47 | 1.25 | 0.95 **  |
| Atp5j         | ATP synthase, H+ transporting, mitochondrial F0 complex, subunit F                                | 11957  | 5.80  | 5.53  | 6.81  | 0.85 | -0.51 ns |
| Dhx15         | DEAH (Asp-Glu-Ala-His) box polypeptide 15                                                         | 13204  | 5.91  | 5.58  | 6.62  | 0.89 | -0.52 ns |
| Hspa4         | heat shock protein 4                                                                              | 15525  | 2.78  | 3.05  | 3.43  | 0.81 | -0.61 ns |
| Sfrs3         | splicing factor, arginine/serine-rich 3 (SRp20)                                                   | 20383  | 7.57  | 8.18  | 6.65  | 1.13 | 0.46 ns  |
| Hmgb3         | high mobility group box 3                                                                         | 15354  | 2.69  | 2.92  | 5.06  | 0.53 | -0.75 ns |
| Vcl           | vinculin                                                                                          | 22330  | 7.85  | 7.63  | 6.07  | 1.29 | 0.70 ns  |
| Nr2f2         | nuclear receptor subfamily 2, group F, member 2                                                   | 11819  | 0.44  | 0.53  | 0.38  | 1.16 | -0.08 ns |
| Rad21         | RAD21 homolog (S. pombe)                                                                          | 19357  | 8.69  | 8.49  | 12.01 | 0.72 | -0.83 *  |
| Cops4         | COP9 (constitutive photomorphogenic) homolog, subunit 4 (Arabidopsis thaliana)                    | 26891  | 1.37  | 1.43  | 1.59  | 0.85 | -0.70 ns |
| Rab31         | RAB31, member RAS oncogene family                                                                 | 106572 | 0.74  | 0.66  | 0.56  | 1.32 | 0.80 ns  |
| Prdx4         | peroxiredoxin 4                                                                                   | 53381  | 2.78  | 3.11  | 3.89  | 0.71 | 0.20 ns  |
| Trap1         | TNF receptor-associated protein 1                                                                 | 68015  | 1.68  | 1.42  | 1.88  | 0.89 | -0.08 ns |
| 2310037I24Rik | RIKEN cDNA 2310037I24 gene                                                                        | 69612  | 1.85  | 1.61  | 1.94  | 0.95 | -0.16 ns |
| Pes1          | pescadillo homolog 1, containing BRCT domain (zebrafish)                                          | 64934  | 0.99  | 1.21  | 1.22  | 0.80 | -0.18 ns |
| Rbbp9         | retinoblastoma binding protein 9                                                                  | 26450  | 0.75  | 0.63  | 0.99  | 0.75 | -0.72 ns |
| Vdac3         | voltage-dependent anion channel 3                                                                 | 22335  | 5.71  | 6.08  | 5.95  | 0.95 | 0.38 ns  |
| Rbmxrt        | RNA binding motif protein, X chromosome retogene                                                  | 19656  | 3.18  | 3.43  | 3.92  | 0.81 | -0.31 ns |
| Mesdc2        | mesoderm development candidate 2                                                                  | 67943  | 1.57  | 1.64  | 1.77  | 0.88 | -0.49 ns |
| Apba3         | amyloid beta (A4) precursor protein-binding, family A, member 3                                   | 57267  | 0.74  | 0.74  | 0.75  | 0.98 | 0.26 ns  |

|           |                                                                                 |        |       |       |       |      |          |
|-----------|---------------------------------------------------------------------------------|--------|-------|-------|-------|------|----------|
| Hmga1     | high mobility group AT-hook 1                                                   | 15361  | 2.71  | 2.72  | 2.55  | 1.06 | 0.63 ns  |
| Adh5      | alcohol dehydrogenase 5 (class III), chi polypeptide                            | 11532  | 4.65  | 4.89  | 3.70  | 1.25 | -0.01 ns |
| Pnrc2     | proline-rich nuclear receptor coactivator 2                                     | 52830  | 1.48  | 1.70  | 2.11  | 0.70 | -0.84 *  |
| Sec61a1   | Sec61 alpha 1 subunit (S. cerevisiae)                                           | 53421  | 3.14  | 3.57  | 3.89  | 0.80 | -0.68 ns |
| Snrpc     | U1 small nuclear ribonucleoprotein C                                            | 20630  | 3.47  | 3.05  | 2.41  | 1.43 | 0.94 **  |
| Th1       | TH1-like homolog (Drosophila)                                                   | 57314  | 1.11  | 1.22  | 1.40  | 0.79 | -0.64 ns |
| Kifc3     | kinesin family member C3                                                        | 16582  | 1.07  | 1.05  | 0.93  | 1.14 | 0.45 ns  |
| Glb1      | galactosidase, beta 1                                                           | 12091  | 0.41  | 0.41  | 0.36  | 1.13 | 0.72 ns  |
| Sipa1     | signal-induced proliferation associated gene 1                                  | 20469  | 0.48  | 0.46  | 0.39  | 1.23 | 0.72 ns  |
| Taz       | tafazzin                                                                        | 66826  | 0.73  | 0.78  | 1.09  | 0.67 | -0.67 ns |
| Usp14     | ubiquitin specific peptidase 14                                                 | 59025  | 1.07  | 1.29  | 1.72  | 0.62 | -0.26 ns |
| Imp3      | IMP3, U3 small nucleolar ribonucleoprotein, homolog (yeast)                     | 102462 | 1.82  | 1.34  | 1.30  | 1.40 | 0.86 *   |
| Magoh     | mago-nashi homolog, proliferation-associated (Drosophila)                       | 17149  | 3.89  | 3.82  | 4.04  | 0.96 | 0.01 ns  |
| Mcm4      | minichromosome maintenance deficient 4 homolog (S. cerevisiae)                  | 17217  | 8.40  | 7.69  | 7.88  | 1.06 | -0.15 ns |
| Gosr1     | golgi SNAP receptor complex member 1                                            | 53334  | 0.84  | 0.66  | 0.58  | 1.45 | 0.37 ns  |
| LOC629949 |                                                                                 | 629949 | 0.63  | 0.72  | 0.36  | 1.74 | 0.32 ns  |
| LOC640991 |                                                                                 | 640991 | 0.63  | 0.72  | 0.36  | 1.74 | 0.32 ns  |
| Rpl19     | ribosomal protein L19                                                           | 19921  | 20.92 | 19.03 | 17.98 | 1.16 | 0.74 ns  |
| Nsdhl     | NAD(P) dependent steroid dehydrogenase-like                                     | 18194  | 1.22  | 1.00  | 1.99  | 0.61 | -0.61 ns |
| Sh3bp5l   | SH3 binding domain protein 5 like                                               | 79566  | 0.47  | 0.44  | 0.38  | 1.23 | 0.94 **  |
| Arpc1b    | actin related protein 2/3 complex, subunit 1B                                   | 11867  | 3.77  | 3.79  | 4.17  | 0.90 | -0.12 ns |
| Pin1      | protein (peptidyl-prolyl cis/trans isomerase) NIMA-interacting 1                | 23988  | 1.68  | 1.25  | 1.35  | 1.24 | 0.66 ns  |
| Rfk       | riboflavin kinase                                                               | 54391  | 1.97  | 1.86  | 1.80  | 1.09 | 0.48 ns  |
| Vac14     | Vac14 homolog (S. cerevisiae)                                                   | 234729 | 0.36  | 0.40  | 0.28  | 1.28 | 0.68 ns  |
| Lrrc59    | leucine rich repeat containing 59                                               | 98238  | 2.22  | 1.98  | 3.15  | 0.70 | -0.76 ns |
| Ass1      | argininosuccinate synthetase 1                                                  | 11898  | 0.34  | 0.55  | 0.47  | 0.73 | -0.33 ns |
| Psmb7     | proteasome (prosome, macropain) subunit, beta type 7                            | 19177  | 8.89  | 7.91  | 6.86  | 1.29 | 0.93 **  |
| Sec13     | SEC13 homolog (S. cerevisiae)                                                   | 110379 | 1.20  | 1.15  | 1.53  | 0.78 | -0.38 ns |
| Cnbp      | cellular nucleic acid binding protein                                           | 12785  | 9.04  | 8.89  | 7.70  | 1.17 | 0.58 ns  |
| Aurkaip1  | aurora kinase A interacting protein 1                                           | 66077  | 1.82  | 1.84  | 2.12  | 0.85 | -0.25 ns |
| Dctn3     | dynactin 3                                                                      | 53598  | 1.15  | 1.09  | 1.25  | 0.92 | -0.03 ns |
| Nadk      | NAD kinase                                                                      | 192185 | 0.62  | 0.56  | 0.71  | 0.87 | -0.56 ns |
| Btg2      | B-cell translocation gene 2, anti-proliferative                                 | 12227  | 1.34  | 1.51  | 1.46  | 0.91 | -0.59 ns |
| Mcm6      | minichromosome maintenance deficient 6 (MIS5 homolog, S. pombe) (S. cerevisiae) | 17219  | 9.33  | 8.40  | 7.09  | 1.31 | 0.81 ns  |
| Stk38     | serine/threonine kinase 38                                                      | 106504 | 2.85  | 2.62  | 2.16  | 1.31 | 0.64 ns  |
| Cdkn2d    | cyclin-dependent kinase inhibitor 2D (p19, inhibits CDK4)                       | 12581  | 0.83  | 0.86  | 1.00  | 0.83 | 0.31 ns  |
| Vps16     | vacuolar protein sorting 16 (yeast)                                             | 80743  | 0.70  | 0.58  | 0.84  | 0.83 | -0.21 ns |
| Tubb5     | tubulin, beta 5                                                                 | 22154  | 14.74 | 13.55 | 12.19 | 1.20 | 0.73 ns  |
| Capn2     | calpain 2                                                                       | 12334  | 2.59  | 2.50  | 1.90  | 1.36 | 0.26 ns  |
| Tk1       | thymidine kinase 1                                                              | 21877  | 1.51  | 1.35  | 1.46  | 1.03 | 0.46 ns  |
| Pex12     | peroxisomal biogenesis factor 12                                                | 103737 | 0.33  | 0.33  | 0.44  | 0.76 | -0.51 ns |
| Snx1      | sorting nexin 1                                                                 | 56440  | 1.10  | 0.94  | 0.93  | 1.17 | 0.75 ns  |
| Tmem19    | transmembrane protein 19                                                        | 67226  | 0.66  | 0.57  | 0.49  | 1.34 | 0.27 ns  |
| Scoc      | short coiled-coil protein                                                       | 56367  | 0.38  | 0.44  | 0.47  | 0.79 | -0.31 ns |
| Ets2      | E26 avian leukemia oncogene 2, 3' domain                                        | 23872  | 2.30  | 2.77  | 2.27  | 1.01 | -0.12 ns |
| Polr2g    | polymerase (RNA) II (DNA directed) polypeptide G                                | 67710  | 3.70  | 4.05  | 3.75  | 0.98 | -0.02 ns |
| Perp      | PERP, TP53 apoptosis effector                                                   | 64058  | 1.72  | 1.79  | 2.20  | 0.78 | -0.70 ns |
| Rps4x     | ribosomal protein S4, X-linked                                                  | 20102  | 22.35 | 21.95 | 20.67 | 1.08 | 0.70 ns  |
| Rplp1     | ribosomal protein, large, P1                                                    | 56040  | 24.19 | 20.69 | 16.55 | 1.45 | 0.96 **  |
| Atp5o     | ATP synthase, H+ transporting, mitochondrial F1 complex, O subunit              | 28080  | 9.69  | 8.79  | 8.64  | 1.12 | 0.76 ns  |
| Ap1b1     | adaptor protein complex AP-1, beta 1 subunit                                    | 11764  | 0.68  | 0.60  | 0.71  | 0.95 | -0.40 ns |
| Wdr45l    | Wdr45 like                                                                      | 66840  | 2.57  | 2.16  | 2.13  | 1.20 | 0.84 *   |
| Psmc3     | proteasome (prosome, macropain) 26S subunit, ATPase 3                           | 19182  | 4.31  | 4.52  | 3.10  | 1.38 | 0.69 ns  |
| Gart      | phosphoribosylglycinamide formyltransferase                                     | 14450  | 1.09  | 1.09  | 1.05  | 1.03 | 0.03 ns  |
| Mrpl28    | mitochondrial ribosomal protein L28                                             | 68611  | 1.67  | 1.79  | 1.37  | 1.21 | 0.78 ns  |
| Dnaja1    | DnaJ (Hsp40) homolog, subfamily A, member 1                                     | 15502  | 3.76  | 3.85  | 4.16  | 0.90 | -0.86 *  |
| Psmc4     | proteasome (prosome, macropain) 26S subunit, ATPase, 4                          | 23996  | 1.78  | 3.35  | 3.80  | 0.47 | -0.65 ns |
| Prdx3     | peroxiredoxin 3                                                                 | 11757  | 1.91  | 2.32  | 1.57  | 1.21 | 0.05 ns  |
| Scamp3    | secretory carrier membrane protein 3                                            | 24045  | 1.00  | 0.99  | 0.92  | 1.08 | -0.07 ns |
| Shcbp1    | Shc SH2-domain binding protein 1                                                | 20419  | 1.95  | 1.90  | 2.94  | 0.66 | -0.12 ns |
| Slc25a3   | solute carrier family 25 (mitochondrial carrier, phosphate carrier), member 3   | 18674  | 15.18 | 13.02 | 10.31 | 1.46 | 0.64 ns  |
| Litaf     | LPS-induced TN factor                                                           | 56722  | 6.01  | 4.86  | 6.53  | 0.92 | -0.21 ns |
| Sh3bp4    | SH3-domain binding protein 4                                                    | 98402  | 0.47  | 0.52  | 0.28  | 1.66 | 0.53 ns  |
| Ugdh      | UDP-glucose dehydrogenase                                                       | 22235  | 2.13  | 2.57  | 2.85  | 0.74 | -0.94 ** |
| Nusap1    | nucleolar and spindle associated protein 1                                      | 108907 | 3.02  | 2.33  | 2.16  | 1.39 | 0.79 ns  |
| Tuba3a    |                                                                                 | 22144  | 0.47  | 0.53  | 0.54  | 0.87 | -0.27 ns |
| Tuba3b    |                                                                                 | 22147  | 0.47  | 0.53  | 0.54  | 0.87 | -0.27 ns |
| Rars      | arginyl-tRNA synthetase                                                         | 104458 | 2.63  | 2.68  | 2.54  | 1.03 | 0.32 ns  |
| Sec22a    | SEC22 vesicle trafficking protein-like A (S. cerevisiae)                        | 317717 | 0.84  | 0.77  | 0.78  | 1.07 | 0.74 ns  |
| Crip1     | cysteine-rich protein 1 (intestinal)                                            | 12925  | 3.30  | 5.39  | 4.05  | 0.81 | 0.07 ns  |
| Ufc1      | ubiquitin-fold modifier conjugating enzyme 1                                    | 66155  | 1.62  | 1.58  | 1.22  | 1.32 | 0.67 ns  |
| Atp6v0e   | ATPase, H+ transporting, lysosomal V0 subunit E                                 | 11974  | 3.93  | 3.41  | 3.13  | 1.25 | 0.65 ns  |
| Cyfp1     | cytoplasmic FMR1 interacting protein 1                                          | 20430  | 2.70  | 2.45  | 3.05  | 0.88 | -0.64 ns |
| Cd81      | CD 81 antigen                                                                   | 12520  | 5.01  | 4.71  | 5.36  | 0.93 | 0.29 ns  |
| Nfe2l1    | nuclear factor, erythroid derived 2,-like 1                                     | 18023  | 1.54  | 1.36  | 1.28  | 1.19 | 0.42 ns  |
| Cirbp     | cold inducible RNA binding protein                                              | 12696  | 1.11  | 0.85  | 0.76  | 1.45 | 0.37 ns  |
| Mif       | macrophage migration inhibitory factor                                          | 17319  | 17.64 | 16.69 | 16.01 | 1.10 | 0.57 ns  |
| Snrpd1    | small nuclear ribonucleoprotein D1                                              | 20641  | 1.19  | 1.60  | 1.79  | 0.66 | -0.31 ns |
| Sh3gl1    | SH3-domain GRB2-like 1                                                          | 20405  | 1.21  | 1.15  | 0.76  | 1.59 | 0.89 *   |
| PrkcsH    | protein kinase C substrate 80K-H                                                | 19089  | 1.57  | 1.82  | 1.70  | 0.92 | 0.17 ns  |
| Man2b1    | mannosidase 2, alpha B1                                                         | 17159  | 0.84  | 0.89  | 0.82  | 1.02 | 0.56 ns  |
| Polr2c    | polymerase (RNA) II (DNA directed) polypeptide C                                | 20021  | 1.77  | 1.86  | 2.14  | 0.82 | 0.14 ns  |
| Timm8a1   | translocase of inner mitochondrial membrane 8 homolog a1 (yeast)                | 30058  | 1.13  | 1.64  | 1.71  | 0.66 | 0.10 ns  |
| Men1      | multiple endocrine neoplasia 1                                                  | 17283  | 1.51  | 1.51  | 1.32  | 1.14 | 0.81 *   |
| Mrpl34    | mitochondrial ribosomal protein L34                                             | 94065  | 0.90  | 0.96  | 1.05  | 0.85 | -0.08 ns |

|               |                                                                                       |        |       |       |       |      |          |
|---------------|---------------------------------------------------------------------------------------|--------|-------|-------|-------|------|----------|
| Klf16         | Kruppel-like factor 16                                                                | 118445 | 0.63  | 0.65  | 0.67  | 0.94 | -0.71 ns |
| Map2k1        | mitogen activated protein kinase kinase 1                                             | 26395  | 1.50  | 1.35  | 1.92  | 0.78 | 0.10 ns  |
| Nr1h2         | nuclear receptor subfamily 1, group H, member 2                                       | 22260  | 0.72  | 0.73  | 1.10  | 0.65 | -0.83 *  |
| Rbmx          | RNA binding motif protein, X chromosome                                               | 19655  | 0.51  | 0.41  | 0.23  | 2.23 | 0.01 ns  |
| Gmpr2         | guanosine monophosphate reductase 2                                                   | 105446 | 0.65  | 0.73  | 0.83  | 0.78 | -0.63 ns |
| Fkbp4         | FK506 binding protein 4                                                               | 14228  | 2.34  | 2.72  | 3.22  | 0.72 | -0.92 ** |
| Hsp90ab1      | heat shock protein 90kDa alpha (cytosolic), class B member 1                          | 15516  | 14.41 | 14.33 | 10.43 | 1.38 | 0.68 ns  |
| Gsta4         | glutathione S-transferase, alpha 4                                                    | 14860  | 0.34  | 0.49  | 0.43  | 0.79 | -0.68 ns |
| Hiat1         | hippocampus abundant transcript-like 1                                                | 66631  | 1.40  | 1.87  | 2.57  | 0.54 | -0.91 *  |
| Ptdss1        | phosphatidylserine synthase 1                                                         | 19210  | 1.03  | 1.47  | 1.51  | 0.68 | -0.51 ns |
| Nfs1          | nitrogen fixation gene 1 (S. cerevisiae)                                              | 18041  | 1.16  | 1.00  | 1.29  | 0.90 | -0.36 ns |
| Tmem97        | transmembrane protein 97                                                              | 69071  | 0.35  | 0.35  | 0.37  | 0.95 | -0.33 ns |
| Pnkp          | polynucleotide kinase 3'-phosphatase                                                  | 59047  | 0.26  | 0.32  | 0.38  | 0.69 | -0.95 ** |
| Prdx5         | peroxiredoxin 5                                                                       | 54683  | 6.21  | 4.84  | 3.37  | 1.83 | 0.80 ns  |
| Ctsc          | cathepsin C                                                                           | 13032  | 1.51  | 1.62  | 3.34  | 0.45 | -0.61 ns |
| Pcx           | pyruvate carboxylase                                                                  | 18563  | 0.45  | 0.43  | 0.29  | 1.57 | 0.92 **  |
| Cope          | coatamer protein complex, subunit epsilon                                             | 59042  | 2.68  | 2.88  | 3.68  | 0.73 | -0.38 ns |
| M6pr          | mannose-6-phosphate receptor, cation dependent                                        | 17113  | 3.88  | 3.90  | 4.51  | 0.85 | -0.26 ns |
| Rcvtb2        | regulator of chromosome condensation (RCC1) and BTB (POZ) domain containing protein 2 | 105670 | 0.44  | 0.51  | 0.50  | 0.87 | -0.45 ns |
| Emg1          | EMG1 nucleolar protein homolog (S. cerevisiae)                                        | 14791  | 3.43  | 3.21  | 3.73  | 0.92 | 0.00 ns  |
| Bag1          | Bcl2-associated athanogene 1                                                          | 12017  | 2.05  | 2.23  | 2.46  | 0.83 | -0.68 ns |
| Guk1          | guanylate kinase 1                                                                    | 14923  | 0.48  | 0.71  | 0.81  | 0.60 | -0.70 ns |
| Hmox2         | heme oxygenase (decycling) 2                                                          | 15369  | 2.04  | 2.01  | 2.39  | 0.85 | -0.71 ns |
| Pycr1         | pyrroline-5-carboxylate reductase-like                                                | 66194  | 0.53  | 0.58  | 0.52  | 1.01 | 0.53 ns  |
| Cd82          | CD82 antigen                                                                          | 12521  | 2.85  | 2.51  | 2.90  | 0.98 | -0.47 ns |
| Abcb10        | ATP-binding cassette, sub-family B (MDR/TAP), member 10                               | 56199  | 0.56  | 0.43  | 0.35  | 1.58 | 0.82 *   |
| Pea15a        | phosphoprotein enriched in astrocytes 15A                                             | 18611  | 3.11  | 3.06  | 3.75  | 0.83 | -0.82 *  |
| Acox1         | acyl-Coenzyme A oxidase 1, palmitoyl                                                  | 11430  | 1.43  | 1.30  | 1.32  | 1.08 | 0.20 ns  |
| Pafah1b3      | platelet-activating factor acetylhydrolase, isoform 1b, alpha1 subunit                | 18476  | 1.64  | 1.64  | 2.04  | 0.80 | -0.70 ns |
| Gstm2         | glutathione S-transferase, mu 2                                                       | 14863  | 3.57  | 6.38  | 3.65  | 0.97 | 0.21 ns  |
| EG666634      |                                                                                       | 666634 | 22.58 | 22.46 | 18.48 | 1.22 | 0.70 ns  |
| H2afz         |                                                                                       | 51788  | 22.58 | 22.46 | 18.48 | 1.22 | 0.70 ns  |
| Gstm1         | glutathione S-transferase, mu 1                                                       | 14862  | 6.71  | 8.18  | 3.63  | 1.84 | 0.25 ns  |
| Ndufb7        | NADH dehydrogenase (ubiquinone) 1 beta subcomplex, 7                                  | 66916  | 4.47  | 4.58  | 4.38  | 1.02 | 0.48 ns  |
| Gabarap1      | gamma-aminobutyric acid (GABA(A)) receptor-associated protein-like 1                  | 57436  | 3.27  | 2.06  | 2.43  | 1.34 | 0.27 ns  |
| EG637379      |                                                                                       | 637379 | 22.02 | 20.62 | 18.04 | 1.21 | 0.87 *   |
| Rpl9          |                                                                                       | 20005  | 22.02 | 20.62 | 18.04 | 1.21 | 0.87 *   |
| M6prbp1       | mannose-6-phosphate receptor binding protein 1                                        | 66905  | 2.17  | 2.05  | 1.56  | 1.38 | 0.95 **  |
| Pex19         | peroxisome biogenesis factor 19                                                       | 19298  | 0.68  | 0.51  | 0.50  | 1.36 | 0.31 ns  |
| Rab5a         | RAB5A, member RAS oncogene family                                                     | 271457 | 3.37  | 3.63  | 3.06  | 1.10 | 0.44 ns  |
| Ccni          | cyclin I                                                                              | 12453  | 13.48 | 11.34 | 12.55 | 1.07 | 0.35 ns  |
| Thap11        | THAP domain containing 11                                                             | 59016  | 0.86  | 0.92  | 0.80  | 1.06 | 0.64 ns  |
| Cat           | catalase                                                                              | 12359  | 0.91  | 0.68  | 0.42  | 2.13 | 0.24 ns  |
| Tubb6         | tubulin, beta 6                                                                       | 67951  | 0.89  | 1.28  | 1.52  | 0.58 | 0.08 ns  |
| Pfkfb3        | 6-phosphofructo-2-kinase/fructose-2,6-biphosphatase 3                                 | 170768 | 0.36  | 0.40  | 0.35  | 1.01 | 0.09 ns  |
| Rpa2          | replication protein A2                                                                | 19891  | 1.06  | 1.15  | 1.17  | 0.90 | 0.17 ns  |
| Ltbr          | lymphotoxin B receptor                                                                | 17000  | 0.83  | 0.79  | 0.81  | 1.02 | -0.43 ns |
| 2410015N17Rik | RIKEN cDNA 2410015N17 gene                                                            | 66422  | 1.24  | 1.47  | 1.41  | 0.88 | 0.12 ns  |
| Cd164         | CD164 antigen                                                                         | 53599  | 7.59  | 6.88  | 7.37  | 1.03 | -0.49 ns |
| Ier2          | immediate early response 2                                                            | 15936  | 2.83  | 3.57  | 2.66  | 1.06 | 0.45 ns  |
| Sae1          | SUMO1 activating enzyme subunit 1                                                     | 56459  | 2.52  | 2.42  | 2.86  | 0.87 | -0.16 ns |
| 2810405J04Rik | RIKEN cDNA 2810405J04 gene                                                            | 72722  | 1.22  | 1.20  | 0.93  | 1.32 | 0.83 *   |
| Itpa          | inosine triphosphatase (nucleoside triphosphate pyrophosphatase)                      | 16434  | 0.76  | 0.85  | 0.84  | 0.90 | -0.13 ns |
| EG432865      |                                                                                       | 432865 | 22.35 | 20.22 | 15.20 | 1.46 | 0.74 ns  |
| LOC670832     |                                                                                       | 670832 | 22.35 | 20.22 | 15.20 | 1.46 | 0.74 ns  |
| LOC671641     |                                                                                       | 671641 | 22.35 | 20.22 | 15.20 | 1.46 | 0.74 ns  |
| Ddah2         | dimethylarginine dimethylaminohydrolase 2                                             | 51793  | 2.36  | 1.99  | 1.06  | 2.22 | 0.91 *   |
| Arf2          | ADP-ribosylation factor 2                                                             | 11841  | 0.59  | 0.57  | 0.53  | 1.12 | 0.50 ns  |
| Vapa          | vesicle-associated membrane protein, associated protein A                             | 30960  | 7.06  | 5.93  | 4.95  | 1.42 | 0.98 *** |
| Luzp1         | leucine zipper protein 1                                                              | 269593 | 1.14  | 0.80  | 1.17  | 0.97 | -0.37 ns |
| Cept1         | choline/ethanolaminephosphotransferase 1                                              | 99712  | 1.78  | 1.82  | 1.16  | 1.52 | 0.79 ns  |
| Syap1         | synapse associated protein 1                                                          | 67043  | 1.40  | 1.51  | 2.57  | 0.54 | -0.42 ns |
| Ube2d2        | ubiquitin-conjugating enzyme E2D 2                                                    | 56550  | 2.17  | 3.25  | 3.65  | 0.59 | -0.75 ns |
| Tmem14c       | transmembrane protein 14C                                                             | 66154  | 1.30  | 1.28  | 1.81  | 0.71 | -0.56 ns |
| Higd1a        | HIG1 domain family, member 1A                                                         | 56295  | 2.69  | 3.30  | 4.36  | 0.61 | -0.32 ns |
| Timm23        | translocase of inner mitochondrial membrane 23 homolog (yeast)                        | 53600  | 3.31  | 3.15  | 3.21  | 1.03 | 0.35 ns  |
| Scye1         | small inducible cytokine subfamily E, member 1                                        | 13722  | 3.09  | 3.28  | 2.40  | 1.28 | 0.52 ns  |
| Ccng2         | cyclin G2                                                                             | 12452  | 2.70  | 2.30  | 4.10  | 0.66 | -0.60 ns |
| Pi4k2b        | phosphatidylinositol 4-kinase type 2 beta                                             | 67073  | 1.31  | 1.31  | 1.42  | 0.92 | -0.55 ns |
| Ddost         | dolichyl-di-phosphooligosaccharide-protein glycotransferase                           | 13200  | 2.69  | 2.59  | 2.90  | 0.92 | 0.17 ns  |
| Ndufs5        | NADH dehydrogenase (ubiquinone) Fe-S protein 5                                        | 595136 | 1.66  | 1.79  | 2.36  | 0.70 | -0.65 ns |
| Mrfap1        | Morf4 family associated protein 1                                                     | 67568  | 7.47  | 7.99  | 8.64  | 0.86 | -0.33 ns |
| Pdia4         | protein disulfide isomerase associated 4                                              | 12304  | 0.80  | 0.87  | 1.02  | 0.79 | -0.52 ns |
| Ppic          | peptidylprolyl isomerase C                                                            | 19038  | 0.16  | 0.57  | 0.19  | 0.81 | 0.15 ns  |
| Dctn6         | dynactin 6                                                                            | 22428  | 1.44  | 1.51  | 2.28  | 0.63 | -0.59 ns |
| Sacm11        | SAC1 (suppressor of actin mutations 1, homolog)-like (S. cerevisiae)                  | 83493  | 1.42  | 1.48  | 1.72  | 0.82 | -0.02 ns |
| Lxn           | latexin                                                                               | 17035  | 3.12  | 2.76  | 1.62  | 1.92 | 0.74 ns  |
| Nr4a1         | nuclear receptor subfamily 4, group A, member 1                                       | 15370  | 0.98  | 1.12  | 0.96  | 1.02 | -0.18 ns |
| Med28         | mediator of RNA polymerase II transcription, subunit 28 homolog (yeast)               | 66999  | 3.16  | 3.48  | 3.67  | 0.86 | -0.20 ns |
| Mrp14         | mitochondrial ribosomal protein L4                                                    | 66163  | 1.03  | 1.04  | 1.00  | 1.03 | 0.51 ns  |
| Nubp2         | nucleotide binding protein 2                                                          | 26426  | 0.69  | 0.67  | 0.65  | 1.07 | 0.63 ns  |
| Lamb2         | laminin, beta 2                                                                       | 16779  | 0.39  | 0.35  | 0.41  | 0.97 | 0.40 ns  |
| Pnpla6        | patatin-like phospholipase domain containing 6                                        | 50767  | 0.86  | 1.00  | 0.90  | 0.95 | -0.23 ns |
| LOC622534     | similar to ribosomal protein L36                                                      | 622534 | 19.51 | 16.99 | 12.54 | 1.55 | 0.75 ns  |
| Grc10         | gene rich cluster, C10 gene                                                           | 14790  | 2.06  | 1.77  | 2.32  | 0.88 | -0.43 ns |
| Spop          | speckle-type POZ protein                                                              | 20747  | 1.84  | 1.60  | 1.62  | 1.13 | 0.64 ns  |

|               |                                                                                               |        |       |       |       |      |          |
|---------------|-----------------------------------------------------------------------------------------------|--------|-------|-------|-------|------|----------|
| Park7         | Parkinson disease (autosomal recessive, early onset) 7                                        | 57320  | 2.14  | 2.25  | 2.23  | 0.95 | -0.02 ns |
| Rab32         | RAB32, member RAS oncogene family                                                             | 67844  | 0.31  | 0.22  | 0.53  | 0.59 | -0.56 ns |
| Sh3bgrl3      | SH3 domain binding glutamic acid-rich protein-like 3                                          | 73723  | 1.15  | 1.42  | 1.87  | 0.61 | -0.88 *  |
| Emp1          | epithelial membrane protein 1                                                                 | 13730  | 5.86  | 5.58  | 5.73  | 1.02 | 0.07 ns  |
| Gsto1         | glutathione S-transferase omega 1                                                             | 14873  | 5.16  | 5.68  | 5.83  | 0.88 | -0.58 ns |
| Trrap         | transformation/transcription domain-associated protein                                        | 100683 | 1.73  | 1.69  | 1.81  | 0.95 | -0.44 ns |
| Egln2         | EGL nine homolog 2 (C. elegans)                                                               | 112406 | 0.86  | 0.95  | 0.90  | 0.95 | -0.12 ns |
| Dpf2          | D4, zinc and double PHD fingers family 2                                                      | 19708  | 2.29  | 1.97  | 1.39  | 1.64 | 0.98 *** |
| LOC666215     |                                                                                               | 666215 | 1.26  | 1.29  | 1.29  | 0.97 | 0.05 ns  |
| Mcrs1         |                                                                                               | 51812  | 1.26  | 1.29  | 1.29  | 0.97 | 0.05 ns  |
| Mum1          | melanoma associated antigen (mutated) 1                                                       | 68114  | 1.20  | 1.17  | 0.95  | 1.25 | 0.21 ns  |
| Creld1        | cysteine-rich with EGF-like domains 1                                                         | 171508 | 0.67  | 0.71  | 0.50  | 1.33 | 0.54 ns  |
| Hgs           | HGF-regulated tyrosine kinase substrate                                                       | 15239  | 1.38  | 1.23  | 1.14  | 1.20 | 0.84 *   |
| Clpb          | ClpB caseinolytic peptidase B homolog (E. coli)                                               | 20480  | 0.40  | 0.49  | 0.75  | 0.53 | -0.78 ns |
| Nfe2l2        | nuclear factor, erythroid derived 2, like 2                                                   | 18024  | 2.87  | 2.90  | 2.57  | 1.11 | 0.09 ns  |
| Ezh2          | enhancer of zeste homolog 2 (Drosophila)                                                      | 14056  | 3.20  | 3.49  | 4.17  | 0.76 | -0.61 ns |
| Zdhhc7        | zinc finger, DHHC domain containing 7                                                         | 102193 | 0.58  | 0.58  | 0.38  | 1.54 | 0.89 *   |
| Rpl6          | ribosomal protein L6                                                                          | 19988  | 19.26 | 18.11 | 16.38 | 1.17 | 0.66 ns  |
| Ndubf3        | NADH dehydrogenase (ubiquinone) 1 beta subcomplex 3                                           | 66495  | 2.19  | 2.27  | 1.88  | 1.16 | 0.30 ns  |
| Stra13        | stimulated by retinoic acid 13                                                                | 20892  | 0.56  | 0.55  | 0.65  | 0.87 | 0.05 ns  |
| Pdlim1        | PDZ and LIM domain 1 (elfin)                                                                  | 54132  | 1.30  | 1.34  | 0.48  | 2.67 | -0.29 ns |
| Ei24          | etoposide induced 2.4 mRNA                                                                    | 13663  | 2.61  | 2.33  | 2.28  | 1.14 | 0.80 ns  |
| Tspan31       | tetraspanin 31                                                                                | 67125  | 4.37  | 4.33  | 4.57  | 0.95 | -0.76 ns |
| Melk          | maternal embryonic leucine zipper kinase                                                      | 17279  | 1.18  | 1.23  | 1.75  | 0.67 | -0.29 ns |
| 1500003O22Rik | RIKEN cDNA 1500003O22 gene                                                                    | 101867 | 0.40  | 0.44  | 0.43  | 0.92 | -0.25 ns |
| Ctps          | cytidine 5'-triphosphate synthase                                                             | 51797  | 0.94  | 1.05  | 1.50  | 0.62 | -0.61 ns |
| Strap         | serine/threonine kinase receptor associated protein                                           | 20901  | 2.33  | 2.31  | 2.73  | 0.85 | -0.64 ns |
| Atp5e         | ATP synthase, H+ transporting, mitochondrial F1 complex, epsilon subunit                      | 67126  | 4.90  | 4.85  | 4.81  | 1.01 | -0.31 ns |
| Actl6a        | actin-like 6A                                                                                 | 56456  | 2.31  | 2.83  | 2.30  | 1.00 | -0.10 ns |
| Gfm1          | G elongation factor, mitochondrial 1                                                          | 28030  | 0.96  | 0.83  | 0.83  | 1.15 | 0.09 ns  |
| Tox4          | TOX high mobility group box family member 4                                                   | 268741 | 0.93  | 1.00  | 0.92  | 1.01 | 0.36 ns  |
| Cdc45l        | cell division cycle 45 homolog (S. cerevisiae)-like                                           | 12544  | 0.91  | 1.01  | 1.31  | 0.70 | -0.32 ns |
| Tacstd1       | tumor-associated calcium signal transducer 1                                                  | 17075  | 11.62 | 10.57 | 8.48  | 1.36 | 0.96 **  |
| Stub1         | STIP1 homology and U-Box containing protein 1                                                 | 56424  | 4.53  | 3.88  | 3.19  | 1.41 | 0.99 *** |
| Wdr5          | WD repeat domain 5                                                                            | 140858 | 1.36  | 1.39  | 1.13  | 1.21 | 0.80 ns  |
| Bad           | Bcl-associated death promoter                                                                 | 12015  | 1.49  | 1.36  | 0.95  | 1.56 | 0.35 ns  |
| Ruvbl1        | RuvB-like protein 1                                                                           | 56505  | 0.69  | 0.77  | 0.81  | 0.85 | -0.50 ns |
| Xrcc1         | X-ray repair complementing defective repair in Chinese hamster cells 1                        | 22594  | 0.47  | 0.55  | 0.62  | 0.75 | -0.78 ns |
| Rab34         | RAB34, member of RAS oncogene family                                                          | 19376  | 1.19  | 1.07  | 0.99  | 1.20 | 0.07 ns  |
| Glrx          | glutaredoxin                                                                                  | 93692  | 0.18  | 0.18  | 0.49  | 0.36 | -0.62 ns |
| Mrps22        | mitochondrial ribosomal protein S22                                                           | 64655  | 0.78  | 0.78  | 0.85  | 0.91 | 0.18 ns  |
| Slc44a4       | solute carrier family 44, member 4                                                            | 70129  | 0.49  | 0.45  | 0.45  | 1.09 | -0.29 ns |
| Hdgfrp2       | hepatoma-derived growth factor, related protein 2                                             | 15193  | 0.37  | 0.40  | 0.24  | 1.53 | 0.86 *   |
| Glis2         | GLIS family zinc finger 2                                                                     | 83396  | 2.54  | 2.71  | 1.90  | 1.33 | -0.25 ns |
| EG627737      |                                                                                               | 627737 | 8.40  | 8.34  | 8.99  | 0.93 | -0.74 ns |
| LOC623483     |                                                                                               | 623483 | 8.40  | 8.34  | 8.99  | 0.93 | -0.74 ns |
| LOC632026     |                                                                                               | 632026 | 8.40  | 8.34  | 8.99  | 0.93 | -0.74 ns |
| Cyc1          | cytochrome c-1                                                                                | 66445  | 3.85  | 4.65  | 5.39  | 0.71 | -0.85 *  |
| Nola2         | nucleolar protein family A, member 2                                                          | 52530  | 4.08  | 4.02  | 3.75  | 1.08 | 0.34 ns  |
| 4931406C07Rik | RIKEN cDNA 4931406C07 gene                                                                    | 70984  | 1.17  | 1.09  | 0.53  | 2.20 | 0.79 ns  |
| BC004004      | cDNA sequence BC004004                                                                        | 80748  | 2.54  | 2.45  | 1.94  | 1.31 | 0.92 **  |
| Scamp2        | secretory carrier membrane protein 2                                                          | 24044  | 1.10  | 0.83  | 0.90  | 1.21 | 0.76 ns  |
| Cyp11b1       | cytochrome P450, family 1, subfamily b, polypeptide 1                                         | 13078  | 0.54  | 0.61  | 0.96  | 0.56 | -0.72 ns |
| Clpp          | caseinolytic peptidase, ATP-dependent, proteolytic subunit homolog (E. coli)                  | 53895  | 1.17  | 1.17  | 0.85  | 1.38 | 0.79 ns  |
| Ppox          | protoporphyrinogen oxidase                                                                    | 19044  | 0.35  | 0.36  | 0.38  | 0.93 | -0.56 ns |
| Smarcal1      | Swi/SNF related matrix associated, actin dependent regulator of chromatin, subfamily a-like 1 | 54380  | 0.44  | 0.38  | 0.35  | 1.24 | 0.62 ns  |
| Llg1          | lethal giant larvae homolog 1 (Drosophila)                                                    | 16897  | 2.05  | 1.98  | 2.36  | 0.87 | -0.65 ns |
| Wbscr16       | Williams-Beuren syndrome chromosome region 16 homolog (human)                                 | 94254  | 0.30  | 0.41  | 0.36  | 0.83 | 0.00 ns  |
| Uba52         |                                                                                               | 22186  | 29.79 | 26.90 | 21.78 | 1.36 | 0.88 *   |
| Spint1        | serine protease inhibitor, Kunitz type 1                                                      | 20732  | 3.43  | 2.37  | 2.04  | 1.67 | 0.55 ns  |
| 0610006I08Rik | RIKEN cDNA 0610006I08 gene                                                                    | 66836  | 1.57  | 1.58  | 1.24  | 1.26 | 0.11 ns  |
| Slc1a5        | solute carrier family 1 (neutral amino acid transporter), member 5                            | 20514  | 0.40  | 0.40  | 0.42  | 0.96 | -0.45 ns |
| Ap4b1         | adaptor-related protein complex AP-4, beta 1                                                  | 67489  | 0.46  | 0.55  | 0.64  | 0.72 | -0.48 ns |
| 5730536A07Rik | RIKEN cDNA 5730536A07 gene                                                                    | 68250  | 2.13  | 2.28  | 2.47  | 0.86 | -0.41 ns |
| Rheb          | RAS-homolog enriched in brain                                                                 | 19744  | 5.57  | 5.59  | 5.61  | 0.99 | 0.03 ns  |
| Slc4a2        | solute carrier family 4 (anion exchanger), member 2                                           | 20535  | 1.87  | 1.63  | 1.68  | 1.11 | 0.02 ns  |
| Lig1          | ligase I, DNA, ATP-dependent                                                                  | 16881  | 2.84  | 3.19  | 3.29  | 0.86 | -0.56 ns |
| Tpt1          | tumor protein, translationally-controlled 1                                                   | 22070  | 32.97 | 29.03 | 24.67 | 1.33 | 0.93 **  |
| Dync1h1       | dynein cytoplasmic 1 heavy chain 1                                                            | 13424  | 3.63  | 3.81  | 4.04  | 0.89 | 0.26 ns  |
| Znhit2        | zinc finger, HIT domain containing 2                                                          | 29805  | 0.82  | 0.84  | 0.71  | 1.15 | 0.23 ns  |
| Stxbp3a       | syntaxin binding protein 3A                                                                   | 20912  | 1.86  | 1.81  | 1.49  | 1.24 | 0.24 ns  |
| C1galt1c1     | C1GALT1-specific chaperone 1                                                                  | 59048  | 1.15  | 1.17  | 1.74  | 0.66 | -0.57 ns |
| Clc1          | chloride intracellular channel 1                                                              | 114584 | 6.87  | 6.41  | 5.92  | 1.15 | 0.55 ns  |
| Akt1          | thymoma viral proto-oncogene 1                                                                | 11651  | 3.04  | 3.03  | 3.48  | 0.87 | -0.11 ns |
| Ndufa9        | NADH dehydrogenase (ubiquinone) 1 alpha subcomplex, 9                                         | 66108  | 3.47  | 3.41  | 3.85  | 0.90 | -0.63 ns |
| Coq7          | demethyl-Q 7                                                                                  | 12850  | 0.73  | 0.81  | 0.80  | 0.90 | -0.17 ns |
| Ebp           | phenylalkylamine Ca2+ antagonist (emopamil) binding protein                                   | 13595  | 0.97  | 1.12  | 1.99  | 0.49 | -0.17 ns |
| Ttc35         | tetratricopeptide repeat domain 35                                                            | 66736  | 1.76  | 1.90  | 2.05  | 0.85 | -0.20 ns |
| Naca          | nascent polypeptide-associated complex alpha polypeptide                                      | 17938  | 17.23 | 15.72 | 14.39 | 1.19 | 0.26 ns  |
| Mcoln1        | mucolipin 1                                                                                   | 94178  | 0.58  | 0.58  | 0.78  | 0.74 | -0.54 ns |
| Cops3         | COP9 (constitutive photomorphogenic) homolog, subunit 3 (Arabidopsis thaliana)                | 26572  | 3.35  | 3.27  | 3.50  | 0.95 | -0.13 ns |
| Abcd3         | ATP-binding cassette, sub-family D (ALD), member 3                                            | 19299  | 3.46  | 3.50  | 3.24  | 1.06 | -0.01 ns |
| Ube3a         | ubiquitin protein ligase E3A                                                                  | 22215  | 3.32  | 3.32  | 3.18  | 1.04 | 0.26 ns  |
| Plxn2         | plexin B2                                                                                     | 140570 | 4.76  | 4.62  | 4.89  | 0.97 | -0.74 ns |

|               |                                                                                                                  |        |       |       |       |       |          |
|---------------|------------------------------------------------------------------------------------------------------------------|--------|-------|-------|-------|-------|----------|
| Fbl           | fibrillarin                                                                                                      | 14113  | 2.18  | 2.87  | 2.29  | 0.95  | 0.30 ns  |
| Plod2         | procollagen lysine, 2-oxoglutarate 5-dioxygenase 2                                                               | 26432  | 1.95  | 1.95  | 1.48  | 1.31  | 0.78 ns  |
| Tuft1         | tuftelin 1                                                                                                       | 22156  | 1.27  | 1.30  | 1.16  | 1.09  | -0.34 ns |
| Gtpbp2        | GTP binding protein 2                                                                                            | 56055  | 0.88  | 0.89  | 0.80  | 1.10  | 0.80 ns  |
| Coil          | coilin                                                                                                           | 12812  | 0.58  | 0.47  | 0.47  | 1.22  | 0.66 ns  |
| Tspo          | translocator protein                                                                                             | 12257  | 3.13  | 3.21  | 3.97  | 0.78  | -0.19 ns |
| D17Wsu104e    | DNA segment, Chr 17, Wayne State University 104, expressed                                                       | 28106  | 0.95  | 1.03  | 0.79  | 1.19  | 0.76 ns  |
| Cks1b         | CDC28 protein kinase 1b                                                                                          | 54124  | 11.52 | 11.70 | 11.84 | 0.97  | -0.07 ns |
| 1110008F13Rik | RIKEN cDNA 1110008F13 gene                                                                                       | 67388  | 3.67  | 3.66  | 4.29  | 0.85  | -0.46 ns |
| Rnd3          | Rho family GTPase 3                                                                                              | 74194  | 1.42  | 1.06  | 1.30  | 1.08  | -0.11 ns |
| Mapk14        | mitogen activated protein kinase 14                                                                              | 26416  | 2.27  | 1.96  | 0.96  | 2.36  | 0.86 *   |
| Rpe           | ribose-5-phosphate-3-epimerase                                                                                   | 66646  | 0.78  | 0.75  | 0.66  | 1.18  | 0.42 ns  |
| Pmf1          | polyamine-modulated factor 1                                                                                     | 67037  | 0.51  | 0.64  | 0.57  | 0.88  | -0.08 ns |
| Ngrn          | neugrin, neurite outgrowth associated                                                                            | 83485  | 0.83  | 0.83  | 0.98  | 0.84  | -0.34 ns |
| Pepd          | peptidase D                                                                                                      | 18624  | 0.45  | 0.52  | 0.42  | 1.06  | -0.07 ns |
| Gjb3          | gap junction membrane channel protein beta 3                                                                     | 14620  | 0.66  | 0.72  | 0.56  | 1.17  | 0.21 ns  |
| EG668457      |                                                                                                                  | 668457 | 21.18 | 18.54 | 12.32 | 1.71  | 0.87 *   |
| Sfrs6         | splicing factor, arginine/serine-rich 6                                                                          | 67996  | 7.39  | 6.63  | 6.36  | 1.16  | 0.50 ns  |
| Hmg20a        | high mobility group 20A                                                                                          | 66867  | 1.27  | 0.93  | 0.91  | 1.38  | 0.87 *   |
| Tcf4          | transcription factor 4                                                                                           | 21413  | 0.45  | 0.49  | 0.36  | 1.24  | -0.26 ns |
| Ube2s         | ubiquitin-conjugating enzyme E2S                                                                                 | 77891  | 5.05  | 5.62  | 6.13  | 0.82  | -0.42 ns |
| Cyb5          | cytochrome b-5                                                                                                   | 109672 | 1.42  | 1.24  | 0.84  | 1.69  | 0.57 ns  |
| Csnk2b        | casein kinase 2, beta polypeptide                                                                                | 13001  | 5.13  | 4.55  | 3.40  | 1.50  | 0.87 *   |
| Rcl1          | RNA terminal phosphate cyclase-like 1                                                                            | 59028  | 0.59  | 0.69  | 0.39  | 1.51  | 0.58 ns  |
| Top2b         | topoisomerase (DNA) II beta                                                                                      | 21974  | 1.38  | 1.43  | 1.74  | 0.79  | -0.73 ns |
| Mkl1          | muskelin 1, intracellular mediator containing kelch motifs                                                       | 27418  | 0.59  | 0.71  | 1.08  | 0.55  | -0.83 *  |
| Asah1         | N-acylsphingosine amidohydrolase 1                                                                               | 11886  | 4.16  | 4.26  | 3.57  | 1.16  | 0.72 ns  |
| Casc3         | cancer susceptibility candidate 3                                                                                | 192160 | 0.98  | 0.90  | 0.82  | 1.19  | -0.11 ns |
| Gys1          | glycogen synthase 1, muscle                                                                                      | 14936  | 0.68  | 0.74  | 0.98  | 0.69  | -0.34 ns |
| Brap          | BRCA1 associated protein                                                                                         | 72399  | 0.63  | 0.54  | 0.55  | 1.14  | 0.72 ns  |
| Cfdp1         | craniofacial development protein 1                                                                               | 23837  | 2.72  | 3.24  | 2.22  | 1.22  | 0.56 ns  |
| LOC640502     |                                                                                                                  | 640502 | 1.50  | 1.61  | 1.54  | 0.97  | -0.16 ns |
| Uap1          |                                                                                                                  | 107652 | 1.50  | 1.61  | 1.54  | 0.97  | -0.16 ns |
| H2afx         | H2A histone family, member X                                                                                     | 15270  | 3.60  | 3.03  | 2.79  | 1.28  | 0.80 ns  |
| D15Mgi27      | DNA Segment, Chr 15, Mouse Genome Informatics 27                                                                 | 106073 | 1.07  | 1.18  | 1.08  | 0.98  | 0.41 ns  |
| Mre11a        | meiotic recombination 11 homolog A (S. cerevisiae)                                                               | 17535  | 0.81  | 0.77  | 0.34  | 2.39  | 0.89 *   |
| Htra1         | HtrA serine peptidase 1                                                                                          | 56213  | 0.56  | 0.52  | 0.56  | 1.00  | 0.21 ns  |
| Opr1          | opioid receptor, sigma 1                                                                                         | 18391  | 0.47  | 0.47  | 0.48  | 0.98  | 0.08 ns  |
| Ddx20         | DEAD (Asp-Glu-Ala-Asp) box polypeptide 20                                                                        | 53975  | 1.06  | 1.03  | 0.74  | 1.42  | 0.59 ns  |
| Dnajb1        | DnaJ (Hsp40) homolog, subfamily B, member 1                                                                      | 81489  | 2.28  | 2.61  | 2.49  | 0.91  | 0.22 ns  |
| Zwilch        | Zwilch, kinetochore associated, homolog (Drosophila)                                                             | 68014  | 1.51  | 1.60  | 1.79  | 0.84  | 0.12 ns  |
| Arhgap27      | Rho GTPase activating protein 27                                                                                 | 544817 | 0.33  | 0.20  | 0.27  | 1.22  | 0.23 ns  |
| Hsd11b2       | hydroxysteroid 11-beta dehydrogenase 2                                                                           | 15484  | 4.44  | 2.54  | 1.96  | 2.25  | 0.79 ns  |
| S100a10       | S100 calcium binding protein A10 (calpactin)                                                                     | 20194  | 4.44  | 4.45  | 4.16  | 1.06  | 0.63 ns  |
| Cdc123        | cell division cycle 123 homolog (S. cerevisiae)                                                                  | 98828  | 2.98  | 2.24  | 2.34  | 1.27  | 0.65 ns  |
| Fis1          | fission 1 (mitochondrial outer membrane) homolog (yeast)                                                         | 66437  | 2.66  | 2.74  | 3.18  | 0.83  | -0.51 ns |
| Magmas        | mitochondria-associated protein involved in granulocyte-macrophage colony-stimulating factor signal transduction | 66449  | 1.46  | 1.93  | 2.88  | 0.51  | -0.88 *  |
| Mosc2         | MOCO sulphurase C-terminal domain containing 2                                                                   | 67247  | 1.13  | 1.25  | 1.00  | 1.12  | 0.69 ns  |
| 1110003E01Rik | RIKEN cDNA 1110003E01 gene                                                                                       | 68552  | 1.12  | 1.21  | 1.86  | 0.60  | -0.62 ns |
| Atp6v0b       | ATPase, H+ transporting, lysosomal V0 subunit B                                                                  | 114143 | 1.97  | 1.99  | 2.65  | 0.74  | -0.61 ns |
| Stk25         | serine/threonine kinase 25 (yeast)                                                                               | 59041  | 2.53  | 2.10  | 1.43  | 1.75  | 0.75 ns  |
| Trappc3       | trafficking protein particle complex 3                                                                           | 27096  | 0.94  | 1.07  | 1.31  | 0.72  | -0.30 ns |
| Wee1          | wee 1 homolog (S. pombe)                                                                                         | 22390  | 1.00  | 0.91  | 1.13  | 0.88  | -0.48 ns |
| Pfkf          | phosphofructokinase, muscle                                                                                      | 18642  | 0.81  | 0.86  | 0.98  | 0.83  | -0.63 ns |
| Praf2         | PRA1 domain family 2                                                                                             | 54637  | 0.54  | 0.65  | 0.98  | 0.55  | -0.12 ns |
| ldh3g         | isocitrate dehydrogenase 3 (NAD+), gamma                                                                         | 15929  | 1.45  | 1.39  | 1.98  | 0.73  | -0.42 ns |
| Nxf1          | nuclear RNA export factor 1 homolog (S. cerevisiae)                                                              | 53319  | 2.28  | 1.85  | 1.46  | 1.55  | 0.86 *   |
| Ppm1g         | protein phosphatase 1G (formerly 2C), magnesium-dependent, gamma isoform                                         | 14208  | 2.41  | 2.79  | 3.21  | 0.75  | -0.64 ns |
| Nck2          | non-catalytic region of tyrosine kinase adaptor protein 2                                                        | 17974  | 0.73  | 0.73  | 0.59  | 1.24  | -0.20 ns |
| Trpm7         | transient receptor potential cation channel, subfamily M, member 7                                               | 58800  | 1.56  | 1.55  | 1.40  | 1.11  | -0.12 ns |
| Cdca5         | cell division cycle associated 5                                                                                 | 67849  | 2.97  | 3.04  | 2.66  | 1.11  | 0.69 ns  |
| 1110032E23Rik | RIKEN cDNA 1110032E23 gene                                                                                       | 68659  | 0.33  | 0.31  | 0.22  | 1.49  | 0.25 ns  |
| Rpl36a        | ribosomal protein L36a                                                                                           | 19982  | 13.43 | 14.13 | 13.68 | 0.98  | 0.39 ns  |
| Mea1          | male enhanced antigen 1                                                                                          | 17256  | 1.72  | 1.69  | 1.22  | 1.40  | 0.79 ns  |
| Tia1          | cytotoxic granule-associated RNA binding protein 1                                                               | 21841  | 1.53  | 1.51  | 1.57  | 0.97  | -0.41 ns |
| Bub3          | budding uninhibited by benzimidazoles 3 homolog (S. cerevisiae)                                                  | 12237  | 3.42  | 3.63  | 3.95  | 0.86  | 0.00 ns  |
| Nek7          | NIMA (never in mitosis gene a)-related expressed kinase 7                                                        | 59125  | 3.64  | 3.05  | 2.15  | 1.68  | 0.45 ns  |
| Cdc37         | cell division cycle 37 homolog (S. cerevisiae)                                                                   | 12539  | 3.70  | 3.32  | 3.09  | 1.19  | 0.78 ns  |
| B230118H07Rik | RIKEN cDNA B230118H07 gene                                                                                       | 68170  | 0.84  | 0.61  | 0.50  | 1.68  | 0.69 ns  |
| Snta1         | syntrophin, acidic 1                                                                                             | 20648  | 0.20  | 0.15  | 0.41  | 0.48  | -0.61 ns |
| Atp5b         | ATP synthase, H+ transporting mitochondrial F1 complex, beta subunit                                             | 11947  | 13.65 | 12.31 | 11.47 | 1.18  | 0.39 ns  |
| 0610031J06Rik | RIKEN cDNA 0610031J06 gene                                                                                       | 56700  | 3.05  | 2.86  | 2.76  | 1.10  | -0.17 ns |
| Neu1          | neuraminidase 1                                                                                                  | 18010  | 0.63  | 0.57  | 0.44  | 1.42  | 0.30 ns  |
| Amd2          |                                                                                                                  | #####  | 1.65  | 1.26  | 1.03  | 1.59  | 0.48 ns  |
| Lrp10         | low-density lipoprotein receptor-related protein 10                                                              | 65107  | 1.93  | 1.92  | 2.16  | 0.89  | -0.08 ns |
| Bax           | Bcl2-associated X protein                                                                                        | 12028  | 1.09  | 1.23  | 1.49  | 0.72  | -0.75 ns |
| Mut           | methylmalonyl-Coenzyme A mutase                                                                                  | 17850  | 1.07  | 0.86  | 0.66  | 1.61  | 0.59 ns  |
| Mid1ip1       | Mid1 interacting protein 1 (gastrulation specific G12-like (zebrafish))                                          | 68041  | 2.78  | 3.64  | 4.43  | 0.62  | -0.45 ns |
| 1110059E24Rik | RIKEN cDNA 1110059E24 gene                                                                                       | 66206  | 1.49  | 1.72  | 1.25  | 1.18  | 0.69 ns  |
| Gstm5         | glutathione S-transferase, mu 5                                                                                  | 14866  | 1.08  | 1.40  | 1.16  | 0.92  | -0.49 ns |
| Pde6d         | phosphodiesterase 6D, cGMP-specific, rod, delta                                                                  | 18582  | 0.88  | 0.96  | 0.89  | 0.99  | 0.03 ns  |
| Tmem132a      | transmembrane protein 132A                                                                                       | 98170  | 2.07  | 2.41  | 1.81  | 1.14  | 0.27 ns  |
| Ubl5          | ubiquitin-like 5                                                                                                 | 66177  | 0.50  | 0.43  | 0.51  | 0.98  | 0.38 ns  |
| Ncdn          | neurochondrin                                                                                                    | 26562  | 0.49  | 0.49  | 0.46  | 1.07  | 0.62 ns  |
| Gas1          | growth arrest specific 1                                                                                         | 14451  | 0.60  | 0.36  | 0.04  | 16.85 | -0.23 ns |

|               |                                                                                        |        |       |       |       |      |          |
|---------------|----------------------------------------------------------------------------------------|--------|-------|-------|-------|------|----------|
| 3230401D17Rik | RIKEN cDNA 3230401D17 gene                                                             | 66680  | 3.05  | 2.89  | 3.20  | 0.95 | -0.07 ns |
| Sdf2          | stromal cell derived factor 2                                                          | 20316  | 2.38  | 2.21  | 2.14  | 1.11 | -0.14 ns |
| Fkbp3         | FK506 binding protein 3                                                                | 30795  | 3.92  | 4.34  | 5.57  | 0.70 | -0.66 ns |
| Stam          | signal transducing adaptor molecule (SH3 domain and ITAM motif) 1                      | 20844  | 0.85  | 0.76  | 0.64  | 1.33 | 0.95 **  |
| Abhd8         | abhydrolase domain containing 8                                                        | 64296  | 0.38  | 0.39  | 0.43  | 0.87 | 0.36 ns  |
| Surf6         | surfeit gene 6                                                                         | 20935  | 0.29  | 0.39  | 0.30  | 0.95 | -0.21 ns |
| Fgd1          | FYVE, RhoGEF and PH domain containing 1                                                | 14163  | 0.19  | 0.32  | 0.42  | 0.47 | -0.20 ns |
| Bet1          | blocked early in transport 1 homolog (S. cerevisiae)                                   | 12068  | 0.35  | 0.46  | 0.52  | 0.67 | -0.30 ns |
| Cdkn2c        | cyclin-dependent kinase inhibitor 2C (p18, inhibits CDK4)                              | 12580  | 2.35  | 2.06  | 2.53  | 0.92 | 0.18 ns  |
| Dnalc4        | dynein, axonemal, light chain 4                                                        | 54152  | 0.55  | 0.52  | 0.66  | 0.82 | -0.70 ns |
| Adam8         | a disintegrin and metallopeptidase domain 8                                            | 11501  | 0.22  | 0.20  | 0.37  | 0.59 | -0.71 ns |
| Cdk2          | cyclin-dependent kinase 2                                                              | 12566  | 1.81  | 1.95  | 2.03  | 0.89 | -0.55 ns |
| Mrpl51        | mitochondrial ribosomal protein L51                                                    | 66493  | 2.74  | 3.02  | 4.11  | 0.66 | -0.74 ns |
| Ciptm1        | cleft lip and palate associated transmembrane protein 1                                | 56457  | 1.38  | 1.19  | 1.35  | 1.02 | 0.38 ns  |
| Cbx3          |                                                                                        | 12417  | 8.80  | 9.10  | 9.50  | 0.92 | -0.65 ns |
| 1110038F14Rik | RIKEN cDNA 1110038F14 gene                                                             | 117171 | 0.73  | 0.74  | 0.84  | 0.87 | -0.31 ns |
| Wdr74         | WD repeat domain 74                                                                    | 107071 | 1.43  | 1.09  | 0.80  | 1.78 | 0.98 *** |
| Numb          | numb gene homolog (Drosophila)                                                         | 18222  | 1.73  | 1.53  | 1.69  | 1.02 | 0.16 ns  |
| 1500019G21Rik | RIKEN cDNA 1500019G21 gene                                                             | 66245  | 0.60  | 0.58  | 0.57  | 1.04 | -0.32 ns |
| Efna1         | efhrin A1                                                                              | 13636  | 1.17  | 1.21  | 1.07  | 1.09 | -0.32 ns |
| Rps6ka1       | ribosomal protein S6 kinase polypeptide 1                                              | 20111  | 1.58  | 1.53  | 2.21  | 0.71 | -0.79 ns |
| Parp9         | poly (ADP-ribose) polymerase family, member 9                                          | 80285  | 0.58  | 0.63  | 1.38  | 0.42 | -0.63 ns |
| Nucb1         | nucleobindin 1                                                                         | 18220  | 1.06  | 1.13  | 1.79  | 0.59 | -0.82 *  |
| Mbnl1         | muscleblind-like 1 (Drosophila)                                                        | 56758  | 5.64  | 5.02  | 4.02  | 1.40 | 0.92 **  |
| Pigyl         | phosphatidylinositol glycan anchor biosynthesis, class Y-like                          | 66268  | 0.88  | 0.75  | 0.69  | 1.27 | 0.70 ns  |
| Dnajc15       | DnaJ (Hsp40) homolog, subfamily C, member 15                                           | 66148  | 1.04  | 1.02  | 1.37  | 0.76 | -0.48 ns |
| Mtvr2         | mammary tumor virus receptor 2                                                         | 17826  | 1.32  | 1.19  | 0.86  | 1.52 | 0.84 *   |
| Msh6          | mutS homolog 6 (E. coli)                                                               | 17688  | 3.43  | 2.84  | 2.39  | 1.43 | 0.83 *   |
| Elf3          | E74-like factor 3                                                                      | 13710  | 1.67  | 1.81  | 1.11  | 1.49 | 0.19 ns  |
| 1700123O20Rik | RIKEN cDNA 1700123O20 gene                                                             | 58248  | 1.25  | 1.25  | 1.13  | 1.10 | 0.22 ns  |
| Dlg3          | discs, large homolog 3 (Drosophila)                                                    | 53310  | 0.45  | 0.35  | 0.50  | 0.90 | -0.31 ns |
| Rbm4          | RNA binding motif protein 4                                                            | 19653  | 0.48  | 0.50  | 0.33  | 1.44 | 0.16 ns  |
| Aldoa         | aldolase 1, A isoform                                                                  | 11674  | 17.55 | 15.45 | 17.43 | 1.00 | -0.02 ns |
| Bnip3l        | BCL2/adenovirus E1B interacting protein 3-like                                         | 12177  | 7.43  | 6.91  | 8.09  | 0.91 | 0.17 ns  |
| Bri3          | brain protein I3                                                                       | 55950  | 2.11  | 1.84  | 1.91  | 1.10 | 0.04 ns  |
| Trp53inp1     | transformation related protein 53 inducible nuclear protein 1                          | 60599  | 0.51  | 0.50  | 1.56  | 0.32 | -0.86 *  |
| Rbm12         | RNA binding motif protein 12                                                           | 75710  | 1.60  | 1.58  | 1.54  | 1.03 | 0.42 ns  |
| Nif3l1        | Ngg1 interacting factor 3-like 1 (S. pombe)                                            | 65102  | 0.50  | 0.54  | 0.39  | 1.29 | -0.11 ns |
| Cog2          | component of oligomeric golgi complex 2                                                | 76332  | 0.46  | 0.45  | 0.38  | 1.21 | 0.56 ns  |
| Por           | P450 (cytochrome) oxidoreductase                                                       | 18984  | 1.24  | 1.28  | 1.75  | 0.70 | -0.78 ns |
| Gabarap       | gamma-aminobutyric acid receptor associated protein                                    | 56486  | 5.85  | 5.70  | 6.54  | 0.89 | -0.76 ns |
| Chchd1        | coiled-coil-helix-coiled-coil-helix domain containing 1                                | 66121  | 2.73  | 2.89  | 2.86  | 0.95 | -0.29 ns |
| Ppa1          | pyrophosphatase (inorganic) 1                                                          | 67895  | 0.75  | 0.91  | 0.66  | 1.13 | 0.01 ns  |
| Ppif          | peptidylprolyl isomerase F (cyclophilin F)                                             | 105675 | 0.62  | 0.63  | 0.48  | 1.30 | 0.81 ns  |
| Ube2e1        |                                                                                        | 22194  | 2.46  | 2.51  | 2.77  | 0.88 | -0.31 ns |
| Acaa1a        |                                                                                        | 113868 | 0.95  | 0.95  | 0.81  | 1.17 | 0.85 *   |
| Acaa1b        |                                                                                        | 235674 | 0.95  | 0.95  | 0.81  | 1.17 | 0.85 *   |
| Mrpl23        | mitochondrial ribosomal protein L23                                                    | 19935  | 1.16  | 1.21  | 1.12  | 1.03 | 0.63 ns  |
| Slc39a7       | solute carrier family 39 (zinc transporter), member 7                                  | 14977  | 1.47  | 1.60  | 1.16  | 1.26 | 0.78 ns  |
| Tnfrsf8       | tumor necrosis factor, alpha-induced protein 8                                         | 106869 | 2.84  | 2.90  | 2.19  | 1.29 | 0.64 ns  |
| Atp6v1d       | ATPase, H+ transporting, lysosomal V1 subunit D                                        | 73834  | 2.37  | 2.56  | 3.24  | 0.73 | -0.85 *  |
| Ctgf          | connective tissue growth factor                                                        | 14219  | 2.89  | 3.00  | 3.46  | 0.83 | -0.36 ns |
| Slc25a10      | solute carrier family 25 (mitochondrial carrier, dicarboxylate transporter), member 10 | 27376  | 1.60  | 1.33  | 1.94  | 0.82 | -0.41 ns |
| Nr1d2         | nuclear receptor subfamily 1, group D, member 2                                        | 353187 | 2.71  | 2.51  | 2.59  | 1.04 | 0.35 ns  |
| B3gat3        | beta-1,3-glucuronyltransferase 3 (glucuronosyltransferase I)                           | 72727  | 0.51  | 0.67  | 0.42  | 1.20 | 0.58 ns  |
| Rcc1          | regulator of chromosome condensation 1                                                 | 100088 | 0.25  | 0.27  | 0.39  | 0.63 | -0.90 *  |
| Eefsec        | eukaryotic elongation factor, selenocysteine-tRNA-specific                             | 65967  | 0.55  | 0.67  | 0.73  | 0.75 | -0.27 ns |
| Hsd3b7        | hydroxy-delta-5-steroid dehydrogenase, 3 beta- and steroid delta-isomerase 7           | 101502 | 0.36  | 0.35  | 0.44  | 0.83 | -0.42 ns |
| Gtse1         | G two S phase expressed protein 1                                                      | 29870  | 0.54  | 0.52  | 0.70  | 0.77 | -0.16 ns |
| Cox7a2        | cytochrome c oxidase, subunit VIIa 2                                                   | 12866  | 14.61 | 12.25 | 11.48 | 1.27 | 0.82 *   |
| EG434401      |                                                                                        | 434401 | 4.12  | 4.13  | 4.10  | 1.00 | 0.33 ns  |
| LOC637555     |                                                                                        | 637555 | 4.12  | 4.13  | 4.10  | 1.00 | 0.33 ns  |
| Nhp2l1        | NHP2 non-histone chromosome protein 2-like 1 (S. cerevisiae)                           | 20826  | 4.45  | 4.11  | 5.39  | 0.82 | -0.51 ns |
| Stam2         | signal transducing adaptor molecule (SH3 domain and ITAM motif) 2                      | 56324  | 1.19  | 1.01  | 0.94  | 1.25 | 0.67 ns  |
| Pomp          | proteasome maturation protein                                                          | 66537  | 3.12  | 3.16  | 3.88  | 0.80 | -0.46 ns |
| Foxo1         | forkhead box O1                                                                        | 56458  | 1.40  | 1.42  | 0.98  | 1.42 | 0.61 ns  |
| Mrps18a       | mitochondrial ribosomal protein S18A                                                   | 68565  | 1.73  | 1.90  | 1.12  | 1.53 | 0.83 *   |
| Msh2          | mutS homolog 2 (E. coli)                                                               | 17685  | 2.83  | 2.69  | 1.22  | 2.32 | 0.90 *   |
| Vps53         | vacuolar protein sorting 53 (yeast)                                                    | 68299  | 0.96  | 0.95  | 0.69  | 1.38 | 0.28 ns  |
| Rxrb          | retinoid X receptor beta                                                               | 20182  | 1.92  | 1.51  | 1.38  | 1.38 | 0.87 *   |
| Mto1          | mitochondrial translation optimization 1 homolog (S. cerevisiae)                       | 68291  | 0.38  | 0.29  | 0.33  | 1.15 | 0.64 ns  |
| Cog4          | component of oligomeric golgi complex 4                                                | 102339 | 0.81  | 0.85  | 0.64  | 1.27 | 0.67 ns  |
| Hap1          | huntingtin-associated protein 1                                                        | 15114  | 0.55  | 0.57  | 0.70  | 0.78 | -0.20 ns |
| Rrs1          | RRS1 ribosome biogenesis regulator homolog (S. cerevisiae)                             | 59014  | 1.46  | 1.63  | 1.12  | 1.30 | 0.31 ns  |
| Smpd2         | sphingomyelin phosphodiesterase 2, neutral                                             | 20598  | 0.44  | 0.46  | 0.35  | 1.24 | 0.31 ns  |
| D4Wsu53e      | DNA segment, Chr 4, Wayne State University 53, expressed                               | 27981  | 1.86  | 1.52  | 1.92  | 0.96 | -0.33 ns |
| Tsg101        | tumor susceptibility gene 101                                                          | 22088  | 1.24  | 1.13  | 1.36  | 0.90 | -0.45 ns |
| Comm4         | COMM domain containing 4                                                               | 66199  | 0.78  | 0.70  | 0.82  | 0.94 | 0.26 ns  |
| Vps4b         | vacuolar protein sorting 4b (yeast)                                                    | 20479  | 3.83  | 4.40  | 3.55  | 1.08 | 0.42 ns  |
| Zfp238        | zinc finger protein 238                                                                | 30928  | 3.52  | 4.18  | 3.96  | 0.88 | -0.56 ns |
| Mapkapk5      | MAP kinase-activated protein kinase 5                                                  | 17165  | 0.70  | 0.59  | 0.64  | 1.09 | 0.31 ns  |
| Efemp2        | epidermal growth factor-containing fibulin-like extracellular matrix protein 2         | 58859  | 2.11  | 2.08  | 1.28  | 1.65 | 0.88 *   |
| Cdc6          | cell division cycle 6 homolog (S. cerevisiae)                                          | 23834  | 1.39  | 1.39  | 1.79  | 0.77 | -0.24 ns |
| Pfdn1         | prefoldin 1                                                                            | 67199  | 1.61  | 1.77  | 2.11  | 0.76 | -0.07 ns |



|               |                                                                                                 |        |       |       |       |       |          |
|---------------|-------------------------------------------------------------------------------------------------|--------|-------|-------|-------|-------|----------|
| Trim2         | tripartite motif protein 2                                                                      | 80890  | 0.08  | 0.16  | 0.39  | 0.21  | -0.91 *  |
| Ube2g2        | ubiquitin-conjugating enzyme E2G 2                                                              | 22213  | 0.69  | 0.68  | 0.59  | 1.16  | -0.16 ns |
| Trappc6a      | trafficking protein particle complex 6A                                                         | 67091  | 0.61  | 0.79  | 1.31  | 0.46  | -0.58 ns |
| Sac3d1        | SAC3 domain containing 1                                                                        | 66406  | 0.67  | 0.68  | 0.63  | 1.07  | 0.69 ns  |
| Orc6l         | origin recognition complex, subunit 6-like (S. cerevisiae)                                      | 56452  | 1.12  | 1.33  | 1.54  | 0.73  | -0.35 ns |
| Sept9         | septin 9                                                                                        | 53860  | 1.31  | 1.32  | 0.99  | 1.32  | 0.36 ns  |
| Cul7          | cullin 7                                                                                        | 66515  | 1.82  | 1.63  | 0.84  | 2.15  | 0.73 ns  |
| Bok           | Bcl-2-related ovarian killer protein                                                            | 51800  | 4.20  | 3.93  | 2.52  | 1.66  | 0.59 ns  |
| Slc37a4       | solute carrier family 37 (glucose-6-phosphate transporter), member 4                            | 14385  | 0.39  | 0.37  | 0.40  | 0.96  | 0.42 ns  |
| Lcmt1         | leucine carboxyl methyltransferase 1                                                            | 30949  | 1.06  | 1.34  | 0.95  | 1.11  | 0.07 ns  |
| Bid           | BH3 interacting domain death agonist                                                            | 12122  | 0.85  | 0.85  | 0.66  | 1.28  | -0.20 ns |
| Tusc4         | tumor suppressor candidate 4                                                                    | 56032  | 0.49  | 0.51  | 0.50  | 0.98  | 0.48 ns  |
| Prom2         | prominin 2                                                                                      | 192212 | 0.78  | 0.82  | 0.79  | 0.98  | -0.44 ns |
| Phb           |                                                                                                 | 18673  | 2.00  | 1.76  | 1.87  | 1.07  | 0.34 ns  |
| 0610009D07Rik | RIKEN cDNA 0610009D07 gene                                                                      | 66055  | 3.56  | 4.78  | 4.49  | 0.79  | -0.57 ns |
| Psmc1         | proteasome (prosome, macropain) 28 subunit, alpha                                               | 19186  | 3.62  | 3.77  | 4.31  | 0.84  | -0.77 ns |
| Lamp3         |                                                                                                 | 239739 | 2.29  | 2.38  | 2.10  | 1.09  | 0.70 ns  |
| Ppid          |                                                                                                 | 67738  | 2.29  | 2.38  | 2.10  | 1.09  | 0.70 ns  |
| Krtcap2       | keratinocyte associated protein 2                                                               | 66059  | 2.44  | 2.66  | 2.47  | 0.98  | -0.24 ns |
| Slc40a1       | solute carrier family 40 (iron-regulated transporter), member 1                                 | 53945  | 1.50  | 1.28  | 0.88  | 1.70  | -0.29 ns |
| Armc10        | armadillo repeat containing 10                                                                  | 67211  | 1.33  | 1.40  | 1.10  | 1.20  | 0.17 ns  |
| Jagn1         | jagunal homolog 1 (Drosophila)                                                                  | 67767  | 1.42  | 1.12  | 1.47  | 0.96  | -0.27 ns |
| Egr1          | early growth response 1                                                                         | 13653  | 9.55  | 9.36  | 6.80  | 1.40  | 0.83 *   |
| Ptpn1         | protein tyrosine phosphatase, non-receptor type 1                                               | 19246  | 1.59  | 1.79  | 2.00  | 0.79  | -0.71 ns |
| 2010309E21Rik | RIKEN cDNA 2010309E21 gene                                                                      | 66488  | 1.28  | 1.27  | 1.53  | 0.83  | -0.46 ns |
| Bcap29        | B-cell receptor-associated protein 29                                                           | 12033  | 0.89  | 1.13  | 1.12  | 0.79  | -0.29 ns |
| Ecsit         | ECSIT homolog (Drosophila)                                                                      | 26940  | 0.46  | 0.42  | 0.38  | 1.21  | 0.77 ns  |
| Syng1         | synaptogyrin 2                                                                                  | 20973  | 1.90  | 2.38  | 2.69  | 0.70  | -0.54 ns |
| Anp32b        | acidic nuclear phosphoprotein 32 family, member B                                               | 67628  | 5.51  | 5.86  | 6.77  | 0.81  | -0.57 ns |
| Sec61b        | Sec61 beta subunit                                                                              | 66212  | 2.11  | 2.05  | 1.83  | 1.15  | 0.57 ns  |
| Zfp346        | zinc finger protein 346                                                                         | 26919  | 0.55  | 0.47  | 0.52  | 1.06  | 0.58 ns  |
| Ckmt1         | creatine kinase, mitochondrial 1, ubiquitous                                                    | 12716  | 0.56  | 0.44  | 0.63  | 0.87  | -0.57 ns |
| Rcn1          | reticulocalbin 1                                                                                | 19672  | 0.40  | 0.13  | 0.02  | 25.47 | 0.77 ns  |
| Chuk          | conserved helix-loop-helix ubiquitous kinase                                                    | 12675  | 1.40  | 1.46  | 1.21  | 1.15  | 0.39 ns  |
| Acot7         | acyl-CoA thioesterase 7                                                                         | 70025  | 1.15  | 1.34  | 1.60  | 0.72  | -0.10 ns |
| Rrp15         | ribosomal RNA processing 15 homolog (S. cerevisiae)                                             | 67223  | 0.43  | 0.48  | 0.37  | 1.16  | 0.36 ns  |
| Ftsj1         | FtsJ homolog 1 (E. coli)                                                                        | 54632  | 0.40  | 0.47  | 0.59  | 0.66  | -0.25 ns |
| Cd320         | CD320 antigen                                                                                   | 54219  | 0.55  | 0.48  | 0.41  | 1.32  | 0.92 **  |
| Hspa2         | heat shock protein 2                                                                            | 15512  | 0.37  | 0.47  | 0.50  | 0.72  | -0.73 ns |
| Ddt           | D-dopachrome tautomerase                                                                        | 13202  | 0.95  | 0.93  | 0.78  | 1.21  | 0.74 ns  |
| Trappc2l      | trafficking protein particle complex 2-like                                                     | 59005  | 1.39  | 1.37  | 1.04  | 1.33  | 0.48 ns  |
| Tpd52l2       | tumor protein D52-like 2                                                                        | 66314  | 0.78  | 0.69  | 0.69  | 1.12  | -0.06 ns |
| Klc4          | kinesin light chain 4                                                                           | 74764  | 0.66  | 0.55  | 0.35  | 1.89  | 0.74 ns  |
| Man1a         | mannosidase 1, alpha                                                                            | 17155  | 0.99  | 0.54  | 0.22  | 4.40  | 0.31 ns  |
| Arl2bp        | ADP-ribosylation factor-like 2 binding protein                                                  | 107566 | 2.38  | 2.41  | 2.58  | 0.92  | 0.13 ns  |
| Gmcl1         | germ cell-less homolog 1 (Drosophila)                                                           | 23885  | 2.11  | 2.61  | 2.26  | 0.93  | -0.32 ns |
| Slc6a8        | solute carrier family 6 (neurotransmitter transporter, creatine), member 8                      | 102857 | 0.66  | 0.69  | 0.59  | 1.11  | 0.49 ns  |
| Zfp1          | zinc finger like protein 1                                                                      | 81909  | 0.61  | 0.65  | 0.52  | 1.16  | 0.18 ns  |
| Vav3          | vav 3 oncogene                                                                                  | 57257  | 0.05  | 0.06  | 0.74  | 0.06  | -0.60 ns |
| Dstn          | destrin                                                                                         | 56431  | 14.60 | 13.61 | 11.73 | 1.24  | 0.90 *   |
| Ahcy          | S-adenosylhomocysteine hydrolase                                                                | 269378 | 3.30  | 3.49  | 4.38  | 0.75  | -0.47 ns |
| Rpl22l1       | ribosomal protein L22 like 1                                                                    | 68028  | 12.48 | 12.36 | 7.24  | 1.72  | 0.56 ns  |
| Cdc25a        | cell division cycle 25 homolog A (S. pombe)                                                     | 12530  | 0.43  | 0.48  | 0.58  | 0.74  | -0.18 ns |
| Srpk2         | serine/arginine-rich protein specific kinase 2                                                  | 20817  | 0.56  | 0.74  | 0.45  | 1.25  | 0.03 ns  |
| Polr2e        | polymerase (RNA) II (DNA directed) polypeptide E                                                | 66420  | 2.42  | 2.49  | 2.44  | 0.99  | -0.60 ns |
| Dsn1          | DSN1, MIND kinetochore complex component, homolog (S. cerevisiae)                               | 66934  | 0.64  | 0.75  | 0.91  | 0.70  | -0.70 ns |
| Igtp          | interferon gamma induced GTPase                                                                 | 16145  | 0.23  | 0.38  | 0.74  | 0.32  | -0.69 ns |
| Tubg1         | tubulin, gamma 1                                                                                | 103733 | 1.83  | 1.85  | 2.46  | 0.74  | -0.31 ns |
| Nfxl1         | nuclear transcription factor, X-box binding-like 1                                              | 100978 | 1.21  | 1.17  | 0.99  | 1.22  | 0.13 ns  |
| 2410018C20Rik | RIKEN cDNA 2410018C20 gene                                                                      | 67873  | 0.33  | 0.33  | 0.44  | 0.76  | -0.63 ns |
| B230317C12Rik | RIKEN cDNA B230317C12 gene                                                                      | 56279  | 0.37  | 0.42  | 0.34  | 1.08  | 0.18 ns  |
| P4ha2         | procollagen-proline, 2-oxoglutarate 4-dioxygenase (proline 4-hydroxylase), alpha II polypeptide | 18452  | 0.57  | 0.54  | 2.18  | 0.26  | -0.60 ns |
| Mycn          | v-myc myelocytomatosis viral related oncogene, neuroblastoma derived (avian)                    | 18109  | 0.33  | 0.39  | 0.66  | 0.50  | -0.90 *  |
| Krt19         | keratin 19                                                                                      | 16669  | 7.31  | 6.33  | 9.06  | 0.80  | -0.40 ns |
| Actr10        | ARP10 actin-related protein 10 homolog (S. cerevisiae)                                          | 56444  | 3.28  | 3.28  | 4.02  | 0.81  | -0.32 ns |
| Cdk2ap2       | CDK2-associated protein 2                                                                       | 52004  | 2.07  | 2.14  | 2.09  | 0.98  | 0.39 ns  |
| Tmbim1        | transmembrane BAX inhibitor motif containing 1                                                  | 69660  | 0.53  | 0.66  | 0.84  | 0.63  | -0.73 ns |
| Dusp10        | dual specificity phosphatase 10                                                                 | 63953  | 0.25  | 0.25  | 0.29  | 0.84  | -0.63 ns |
| Mbd2          | methyl-CpG binding domain protein 2                                                             | 17191  | 0.98  | 1.03  | 1.30  | 0.76  | -0.40 ns |
| Exosc5        | exosome component 5                                                                             | 27998  | 0.54  | 0.43  | 0.35  | 1.52  | 0.91 *   |
| Usp2          | ubiquitin specific peptidase 2                                                                  | 53376  | 0.43  | 0.35  | 0.21  | 2.02  | 0.93 **  |
| Lztf11        | leucine zipper transcription factor-like 1                                                      | 93730  | 0.60  | 0.60  | 0.44  | 1.37  | 0.72 ns  |
| Crebl1        | cAMP responsive element binding protein-like 1                                                  | 12915  | 0.45  | 0.44  | 0.38  | 1.20  | 0.58 ns  |
| Csnk1e        | casein kinase 1, epsilon                                                                        | 27373  | 1.92  | 1.97  | 2.14  | 0.89  | -0.41 ns |
| Galk1         | galactokinase 1                                                                                 | 14635  | 1.44  | 1.83  | 2.43  | 0.59  | -0.56 ns |
| Gipc2         | GIPC PDZ domain containing family, member 2                                                     | 54120  | 1.96  | 2.27  | 1.46  | 1.33  | 0.37 ns  |
| Tspan5        | tetraspanin 5                                                                                   | 56224  | 1.19  | 1.56  | 1.41  | 0.84  | -0.56 ns |
| Pcsk7         | proprotein convertase subtilisin/kexin type 7                                                   | 18554  | 0.37  | 0.28  | 0.39  | 0.96  | 0.15 ns  |
| Ly6a          | lymphocyte antigen 6 complex, locus A                                                           | 110454 | 0.21  | 0.79  | 5.91  | 0.04  | -0.66 ns |
| Psmc2         | proteasome (prosome, macropain) 28 subunit, beta                                                | 19188  | 1.37  | 1.99  | 2.40  | 0.57  | -0.90 *  |
| Dnajb9        | DnaJ (Hsp40) homolog, subfamily B, member 9                                                     | 27362  | 1.27  | 1.52  | 1.90  | 0.67  | -0.90 *  |
| Tmem183a      | transmembrane protein 183A                                                                      | 57439  | 1.10  | 1.09  | 0.93  | 1.18  | -0.12 ns |
| Ethe1         | ethylmalonic encephalopathy 1                                                                   | 66071  | 0.41  | 0.43  | 0.75  | 0.54  | -0.75 ns |
| Kdelr2        | KDEL (Lys-Asp-Glu-Leu) endoplasmic reticulum protein retention receptor 2                       | 66913  | 4.42  | 4.44  | 4.77  | 0.92  | -0.38 ns |

|               |                                                                                              |        |       |       |       |      |          |
|---------------|----------------------------------------------------------------------------------------------|--------|-------|-------|-------|------|----------|
| Dvl2          | dishevelled 2, dsh homolog (Drosophila)                                                      | 13543  | 0.45  | 0.42  | 0.43  | 1.04 | -0.22 ns |
| 1110032A03Rik | RIKEN cDNA 1110032A03 gene                                                                   | 68721  | 0.43  | 0.36  | 0.34  | 1.27 | 0.82 *   |
| Rab27b        | RAB27b, member RAS oncogene family                                                           | 80718  | 0.27  | 0.20  | 0.26  | 1.05 | 0.33 ns  |
| Cd2bp2        | CD2 antigen (cytoplasmic tail) binding protein 2                                             | 70233  | 0.92  | 0.96  | 1.01  | 0.91 | 0.04 ns  |
| Arl6ip5       | ADP-ribosylation factor-like 6 interacting protein 5                                         | 65106  | 1.22  | 0.79  | 1.04  | 1.17 | 0.38 ns  |
| Fbxw4         | F-box and WD-40 domain protein 4                                                             | 30838  | 0.82  | 0.90  | 0.89  | 0.91 | -0.45 ns |
| Mccc1         | methylcrotonoyl-Coenzyme A carboxylase 1 (alpha)                                             | 72039  | 0.76  | 0.68  | 0.40  | 1.87 | 0.72 ns  |
| Capn1         | calpain 1                                                                                    | 12333  | 1.27  | 1.38  | 0.99  | 1.28 | 0.55 ns  |
| Chchd4        | coiled-coil-helix-coiled-coil-helix domain containing 4                                      | 72170  | 0.93  | 1.00  | 1.06  | 0.88 | -0.45 ns |
| Mmp11         | matrix metalloproteinase 11                                                                  | 17385  | 0.40  | 0.48  | 0.18  | 2.19 | 0.41 ns  |
| Cetn3         | centrin 3                                                                                    | 12626  | 1.88  | 2.76  | 3.06  | 0.61 | -0.90 *  |
| Zyx           | zyxin                                                                                        | 22793  | 1.31  | 1.26  | 1.50  | 0.87 | -0.77 ns |
| Eif4a3        | eukaryotic translation initiation factor 4A, isoform 3                                       | 192170 | 4.81  | 4.14  | 4.97  | 0.96 | 0.32 ns  |
| 2310065K24Rik | RIKEN cDNA 2310065K24 gene                                                                   | 102122 | 1.25  | 1.24  | 1.55  | 0.80 | 0.00 ns  |
| Gpr180        | G protein-coupled receptor 180                                                               | 58245  | 0.68  | 0.59  | 0.72  | 0.95 | 0.03 ns  |
| Al597479      | expressed sequence Al597479                                                                  | 98404  | 0.45  | 0.48  | 0.42  | 1.07 | 0.54 ns  |
| Rnf12         | ring finger protein 12                                                                       | 19820  | 1.31  | 1.38  | 2.08  | 0.63 | -0.63 ns |
| Nt5c          | 5',3'-nucleotidase, cytosolic                                                                | 50773  | 0.94  | 1.00  | 1.09  | 0.86 | -0.01 ns |
| Frg1          | FSHD region gene 1                                                                           | 14300  | 1.63  | 1.67  | 1.71  | 0.95 | 0.06 ns  |
| Ift140        | intraflagellar transport 140 homolog (Chlamydomonas)                                         | 106633 | 1.07  | 0.97  | 0.63  | 1.67 | 0.94 **  |
| Cct5          | chaperonin subunit 5 (epsilon)                                                               | 12465  | 9.00  | 8.89  | 9.39  | 0.95 | -0.22 ns |
| U2af2         | U2 small nuclear ribonucleoprotein auxiliary factor (U2AF) 2                                 | 22185  | 1.15  | 1.26  | 1.30  | 0.88 | -0.70 ns |
| Ptgs2         | prostaglandin-endoperoxide synthase 2                                                        | 19225  | 0.93  | 1.15  | 1.15  | 0.80 | -0.68 ns |
| Coq5          | coenzyme Q5 homolog, methyltransferase (yeast)                                               | 52064  | 0.58  | 0.61  | 0.58  | 0.99 | 0.24 ns  |
| Cd14          | CD14 antigen                                                                                 | 12475  | 1.17  | 1.45  | 1.44  | 0.81 | -0.43 ns |
| Cdk9          | cyclin-dependent kinase 9 (CDC2-related kinase)                                              | 107951 | 2.53  | 2.27  | 1.87  | 1.35 | 0.48 ns  |
| Snrpa         | small nuclear ribonucleoprotein polypeptide A                                                | 53607  | 1.55  | 1.73  | 1.51  | 1.02 | 0.42 ns  |
| Mal           | myelin and lymphocyte protein, T-cell differentiation protein                                | 17153  | 17.20 | 14.25 | 15.12 | 1.13 | -0.13 ns |
| Mapkap1       | mitogen-activated protein kinase associated protein 1                                        | 227743 | 0.60  | 0.69  | 0.60  | 0.99 | -0.47 ns |
| Ndufa5        | NADH dehydrogenase (ubiquinone) 1 alpha subcomplex, 5                                        | 68202  | 2.25  | 2.52  | 2.46  | 0.91 | -0.06 ns |
| H13           | histocompatibility 13                                                                        | 14950  | 1.43  | 1.67  | 2.02  | 0.70 | -0.78 ns |
| Plekha2       | pleckstrin homology domain-containing, family A (phosphoinositide binding specific) member 2 | 83436  | 3.57  | 3.69  | 4.42  | 0.80 | 0.12 ns  |
| Tnfrsf1a      | tumor necrosis factor receptor superfamily, member 1a                                        | 21937  | 0.90  | 0.95  | 1.25  | 0.72 | -0.93 ** |
| Ilf147        | interferon gamma inducible protein 47                                                        | 15953  | 0.10  | 0.10  | 0.42  | 0.23 | -0.55 ns |
| Hs6st1        | heparan sulfate 6-O-sulfotransferase 1                                                       | 50785  | 0.91  | 0.90  | 0.68  | 1.33 | -0.08 ns |
| Mta1          | metastasis associated 1                                                                      | 116870 | 0.97  | 0.92  | 1.03  | 0.93 | -0.56 ns |
| Atf1          | activating transcription factor 1                                                            | 11908  | 2.62  | 2.65  | 2.85  | 0.92 | 0.05 ns  |
| Itp3          | inositol 1,4,5-triphosphate receptor 3                                                       | 16440  | 1.91  | 1.69  | 1.24  | 1.53 | 0.94 **  |
| Ebpl          | emopamil binding protein-like                                                                | 68177  | 0.52  | 0.39  | 0.22  | 2.31 | 0.82 *   |
| Smpdl3b       | sphingomyelin phosphodiesterase, acid-like 3B                                                | 100340 | 0.67  | 0.82  | 1.01  | 0.66 | -0.62 ns |
| Fzd6          | frizzled homolog 6 (Drosophila)                                                              | 14368  | 1.41  | 1.30  | 1.06  | 1.33 | 0.62 ns  |
| Tyk2          | tyrosine kinase 2                                                                            | 54721  | 0.32  | 0.33  | 0.36  | 0.88 | 0.23 ns  |
| Pkm2          | pyruvate kinase, muscle                                                                      | 18746  | 12.34 | 10.92 | 9.95  | 1.23 | 0.80 ns  |
| Crip2         | cysteine rich protein 2                                                                      | 68337  | 7.52  | 6.54  | 6.07  | 1.23 | 0.63 ns  |
| Lsm7          | LSM7 homolog, U6 small nuclear RNA associated (S. cerevisiae)                                | 66094  | 0.86  | 1.05  | 0.59  | 1.45 | 0.69 ns  |
| Gripap1       | GRIP1 associated protein 1                                                                   | 54645  | 0.47  | 0.47  | 0.64  | 0.73 | 0.01 ns  |
| Them2         | thioesterase superfamily member 2                                                            | 66834  | 1.41  | 1.22  | 1.18  | 1.19 | 0.27 ns  |
| Rpl35a        | ribosomal protein L35a                                                                       | 57808  | 23.93 | 23.06 | 20.07 | 1.19 | 0.90 *   |
| Grpel1        | GrpE-like 1, mitochondrial                                                                   | 17713  | 1.62  | 1.78  | 1.99  | 0.81 | -0.31 ns |
| Dohh          | deoxyhypusine hydroxylase/monooxygenase                                                      | 102115 | 0.86  | 0.73  | 0.79  | 1.09 | 0.45 ns  |
| Psrc1         | proline/serine-rich coiled-coil 1                                                            | 56742  | 0.60  | 0.74  | 0.61  | 0.98 | -0.35 ns |
| Mast2         | microtubule associated serine/threonine kinase 2                                             | 17776  | 1.10  | 1.07  | 1.23  | 0.89 | -0.21 ns |
| Anapc11       | anaphase promoting complex subunit 11 homolog (yeast)                                        | 66156  | 3.25  | 3.03  | 3.72  | 0.87 | 0.22 ns  |
| Cav2          | caveolin 2                                                                                   | 12390  | 5.88  | 4.78  | 7.48  | 0.78 | -0.48 ns |
| Slc23a2       | solute carrier family 23 (nucleobase transporters), member 2                                 | 54338  | 0.27  | 0.38  | 0.43  | 0.63 | -0.32 ns |
| Arl6          | ADP-ribosylation factor-like 6                                                               | 56297  | 1.75  | 1.55  | 1.69  | 1.03 | 0.14 ns  |
| Stk19         | serine/threonine kinase 19                                                                   | 54402  | 0.35  | 0.36  | 0.25  | 1.43 | 0.64 ns  |
| Sulf2b1       | sulfotransferase family, cytosolic, 2B, member 1                                             | 54200  | 0.25  | 0.31  | 0.49  | 0.50 | -0.67 ns |
| Dynl1         |                                                                                              | 56455  | 16.34 | 16.50 | 12.50 | 1.30 | 0.70 ns  |
| EG627788      |                                                                                              | 627788 | 16.34 | 16.50 | 12.50 | 1.30 | 0.70 ns  |
| 2900064A13Rik | RIKEN cDNA 2900064A13 gene                                                                   | 73024  | 1.96  | 1.65  | 1.98  | 0.98 | 0.37 ns  |
| 2310039H08Rik | RIKEN cDNA 2310039H08 gene                                                                   | 67101  | 1.54  | 1.43  | 1.04  | 1.46 | 0.88 *   |
| Pldn          | pallidin                                                                                     | 18457  | 1.28  | 1.08  | 0.95  | 1.35 | 0.52 ns  |
| Snrpa1        | small nuclear ribonucleoprotein polypeptide A'                                               | 68981  | 1.36  | 1.82  | 2.17  | 0.62 | -0.60 ns |
| Sil1          | endoplasmic reticulum chaperone SIL1 homolog (S. cerevisiae)                                 | 81500  | 0.43  | 0.44  | 0.69  | 0.62 | -0.32 ns |
| Emd           | emerin                                                                                       | 13726  | 0.62  | 0.75  | 1.33  | 0.46 | -0.68 ns |
| Mlh1          | mutL homolog 1 (E. coli)                                                                     | 17350  | 0.29  | 0.32  | 0.32  | 0.90 | -0.32 ns |
| Asb3          | ankyrin repeat and SOCS box-containing protein 3                                             | 65257  | 0.41  | 0.40  | 0.46  | 0.88 | 0.14 ns  |
| Rhcg          | Rhesus blood group-associated C glycoprotein                                                 | 56315  | 1.17  | 0.21  | 0.20  | 5.92 | 0.65 ns  |
| Eef1g         | eukaryotic translation elongation factor 1 gamma                                             | 67160  | 16.93 | 15.94 | 11.57 | 1.46 | 0.76 ns  |
| Ppp2ca        | protein phosphatase 2 (formerly 2A), catalytic subunit, alpha isoform                        | 19052  | 6.97  | 6.82  | 7.33  | 0.95 | -0.31 ns |
| Ndufa2        | NADH dehydrogenase (ubiquinone) 1 alpha subcomplex, 2                                        | 17991  | 3.62  | 3.95  | 3.91  | 0.92 | 0.28 ns  |
| Hsd17b4       | hydroxysteroid (17-beta) dehydrogenase 4                                                     | 15488  | 1.25  | 1.38  | 1.26  | 0.99 | 0.15 ns  |
| Peli1         | pellino 1                                                                                    | 67245  | 1.52  | 1.33  | 1.79  | 0.84 | -0.59 ns |
| Tuba4a        | tubulin, alpha 4A                                                                            | 22145  | 10.58 | 9.62  | 7.65  | 1.38 | 0.87 *   |
| Cadm1         | cell adhesion molecule 1                                                                     | 54725  | 2.85  | 2.18  | 2.36  | 1.20 | 0.35 ns  |
| Iqgap1        | IQ motif containing GTPase activating protein 1                                              | 29875  | 6.90  | 6.62  | 6.24  | 1.10 | 0.09 ns  |
| Entpd5        | ectonucleoside triphosphate diphosphohydrolase 5                                             | 12499  | 0.95  | 0.98  | 2.44  | 0.39 | -0.67 ns |
| Npepps        | aminopeptidase puromycin sensitive                                                           | 19155  | 2.20  | 1.81  | 2.34  | 0.93 | -0.30 ns |
| Med31         | mediator of RNA polymerase II transcription, subunit 31 homolog (yeast)                      | 67279  | 1.08  | 0.99  | 1.07  | 1.00 | 0.05 ns  |
| Gpc1          | glypican 1                                                                                   | 14733  | 1.01  | 0.67  | 0.38  | 2.67 | 0.96 **  |
| Klf4          | Kruppel-like factor 4 (gut)                                                                  | 16600  | 0.28  | 0.36  | 0.92  | 0.30 | -0.85 *  |
| Slc9a1        | solute carrier family 9 (sodium/hydrogen exchanger), member 1                                | 20544  | 0.28  | 0.28  | 0.30  | 0.93 | -0.52 ns |
| Rras2         | related RAS viral (r-ras) oncogene homolog 2                                                 | 66922  | 1.76  | 1.72  | 2.18  | 0.81 | -0.63 ns |
| Rai14         | retinoic acid induced 14                                                                     | 75646  | 1.08  | 1.11  | 1.20  | 0.90 | -0.77 ns |
| 1190017O12Rik | RIKEN cDNA 1190017O12 gene                                                                   | 68936  | 0.85  | 0.87  | 1.09  | 0.78 | -0.84 *  |

|               |                                                                                               |        |       |       |       |      |          |
|---------------|-----------------------------------------------------------------------------------------------|--------|-------|-------|-------|------|----------|
| Elov6         | ELOVL family member 6, elongation of long chain fatty acids (yeast)                           | 170439 | 4.87  | 3.32  | 1.06  | 4.59 | 0.53 ns  |
| Stard3        | START domain containing 3                                                                     | 59045  | 0.86  | 0.66  | 0.93  | 0.92 | -0.39 ns |
| Sertad1       | SERTA domain containing 1                                                                     | 55942  | 0.71  | 0.82  | 0.96  | 0.73 | -0.32 ns |
| Fbx14         | F-box and leucine-rich repeat protein 14                                                      | 101358 | 0.74  | 0.76  | 0.70  | 1.05 | 0.28 ns  |
| F3            | coagulation factor III                                                                        | 14066  | 8.59  | 7.68  | 5.32  | 1.61 | 0.06 ns  |
| Jun           | Jun oncogene                                                                                  | 16476  | 2.53  | 2.07  | 2.49  | 1.01 | -0.41 ns |
| Prkci         | protein kinase C, iota                                                                        | 18759  | 7.37  | 7.31  | 5.40  | 1.36 | 0.46 ns  |
| Cox6a1        | cytochrome c oxidase, subunit VI a, polypeptide 1                                             | 12861  | 17.68 | 15.50 | 14.60 | 1.21 | 0.72 ns  |
| Ccnd1         | cyclin D1                                                                                     | 12443  | 1.23  | 1.44  | 1.58  | 0.78 | -0.43 ns |
| Grina         | glutamate receptor, ionotropic, N-methyl D-aspartate-associated protein 1 (glutamate binding) | 66168  | 2.18  | 2.08  | 2.28  | 0.95 | 0.18 ns  |
| Prkrip1       | Prkr interacting protein 1 (IL11 inducible)                                                   | 66801  | 0.40  | 0.49  | 0.54  | 0.74 | -0.49 ns |
| Gnb1          | guanine nucleotide binding protein, beta 1                                                    | 14688  | 4.03  | 3.83  | 5.18  | 0.77 | -0.39 ns |
| Lypla2        | lysophospholipase 2                                                                           | 26394  | 1.07  | 0.93  | 1.24  | 0.86 | -0.11 ns |
| Gpd2          | glycerol phosphate dehydrogenase 2, mitochondrial                                             | 14571  | 2.18  | 2.19  | 1.61  | 1.35 | 0.07 ns  |
| Large         | like-glycosyltransferase                                                                      | 16795  | 0.48  | 0.44  | 0.10  | 4.61 | 0.70 ns  |
| Xrcc6         | X-ray repair complementing defective repair in Chinese hamster cells 6                        | 14375  | 0.82  | 1.06  | 1.07  | 0.77 | -0.29 ns |
| Rdh14         | retinol dehydrogenase 14 (all-trans and 9-cis)                                                | 105014 | 0.79  | 0.95  | 1.23  | 0.64 | -0.67 ns |
| Dnajc12       | DnaJ (Hsp40) homolog, subfamily C, member 12                                                  | 30045  | 0.34  | 0.24  | 0.37  | 0.91 | -0.33 ns |
| E2f5          | E2F transcription factor 5                                                                    | 13559  | 0.67  | 0.77  | 0.69  | 0.97 | -0.53 ns |
| Ndc80         | NDC80 homolog, kinetochore complex component (S. cerevisiae)                                  | 67052  | 0.58  | 0.62  | 0.48  | 1.20 | 0.72 ns  |
| Slc12a4       | solute carrier family 12, member 4                                                            | 20498  | 0.32  | 0.42  | 0.29  | 1.07 | 0.50 ns  |
| 1810008A18Rik | RIKEN cDNA 1810008A18 gene                                                                    | 108707 | 0.67  | 0.52  | 0.40  | 1.68 | 0.87 *   |
| Acot8         | acyl-CoA thioesterase 8                                                                       | 170789 | 0.63  | 0.59  | 0.69  | 0.91 | -0.33 ns |
| Tacc3         | transforming, acidic coiled-coil containing protein 3                                         | 21335  | 1.08  | 1.27  | 1.39  | 0.77 | -0.19 ns |
| Ppia          | peptidylprolyl isomerase A                                                                    | 268373 | 26.49 | 24.60 | 22.39 | 1.18 | 0.91 *   |
| Fau           | Finkel-Biskis-Reilly murine sarcoma virus (FBR-MuSV) ubiquitously expressed (fox derived)     | 14109  | 25.48 | 21.73 | 17.10 | 1.48 | 0.98 *** |
| Cul4b         | cullin 4B                                                                                     | 72584  | 1.36  | 1.26  | 1.63  | 0.83 | -0.31 ns |
| Gnpat         | glyceronephosphate O-acyltransferase                                                          | 14712  | 0.68  | 0.72  | 0.59  | 1.14 | 0.51 ns  |
| Cks2          | CDC28 protein kinase regulatory subunit 2                                                     | 66197  | 5.74  | 6.10  | 5.36  | 1.07 | 0.59 ns  |
| Ifitm2        | interferon induced transmembrane protein 2                                                    | 80876  | 3.70  | 3.47  | 3.77  | 0.98 | -0.57 ns |
| Cap1          | CAP, adenylate cyclase-associated protein 1 (yeast)                                           | 12331  | 2.53  | 2.65  | 3.22  | 0.78 | -0.58 ns |
| 2400001E08Rik |                                                                                               | 66508  | 4.82  | 4.53  | 5.96  | 0.80 | -0.77 ns |
| EG433216      |                                                                                               | 433216 | 4.82  | 4.53  | 5.96  | 0.80 | -0.77 ns |
| Tnnc2         | troponin C2, fast                                                                             | 21925  | 0.13  | 0.21  | 0.37  | 0.36 | -0.76 ns |
| Tada3l        | transcriptional adaptor 3 (NGG1 homolog, yeast)-like                                          | 101206 | 0.39  | 0.45  | 0.60  | 0.64 | -0.43 ns |
| Nit1          | nitrilase 1                                                                                   | 27045  | 0.86  | 0.83  | 0.84  | 1.02 | -0.29 ns |
| Apobec3       | apolipoprotein B editing complex 3                                                            | 80287  | 0.45  | 0.44  | 0.40  | 1.13 | -0.10 ns |
| D1Erd622e     | DNA segment, Chr 1, ERATO Doi 622, expressed                                                  | 52392  | 0.97  | 0.94  | 0.56  | 1.72 | 0.44 ns  |
| 1500035H01Rik | RIKEN cDNA 1500035H01 gene                                                                    | 76568  | 1.39  | 1.06  | 0.80  | 1.73 | 0.88 *   |
| Atp13a1       | ATPase type 13A1                                                                              | 170759 | 1.37  | 1.22  | 1.34  | 1.02 | 0.53 ns  |
| Fbxw5         | F-box and WD-40 domain protein 5                                                              | 30839  | 0.38  | 0.49  | 0.35  | 1.10 | 0.03 ns  |
| Gtlf3b        | gene trap locus F3b                                                                           | 24083  | 0.87  | 0.81  | 0.92  | 0.94 | -0.04 ns |
| Ppp2r3c       | protein phosphatase 2, regulatory subunit B', gamma                                           | 59032  | 0.89  | 0.92  | 1.09  | 0.81 | -0.52 ns |
| Fbxo9         | f-box protein 9                                                                               | 71538  | 0.76  | 0.64  | 0.52  | 1.45 | 0.95 **  |
| Nfkbiz        | nuclear factor of kappa light polypeptide gene enhancer in B-cells inhibitor, zeta            | 80859  | 1.31  | 1.51  | 2.41  | 0.54 | -0.89 *  |
| Fosl1         | fos-like antigen 1                                                                            | 14283  | 0.42  | 0.58  | 0.45  | 0.93 | 0.37 ns  |
| Ctsb          | cathepsin B                                                                                   | 13030  | 3.89  | 4.45  | 4.89  | 0.79 | -0.70 ns |
| Bmi1          | Bmi1 polycomb ring finger oncogene                                                            | 12151  | 2.00  | 2.07  | 1.44  | 1.38 | 0.51 ns  |
| Timm10        | translocase of inner mitochondrial membrane 10 homolog (yeast)                                | 30059  | 1.03  | 0.93  | 0.75  | 1.37 | 0.54 ns  |
| Fbxo6         | F-box protein 6                                                                               | 50762  | 0.33  | 0.35  | 0.57  | 0.57 | -0.76 ns |
| Rfc2          | replication factor C (activator 1) 2                                                          | 19718  | 2.11  | 2.22  | 2.20  | 0.95 | 0.20 ns  |
| Gmnn          | geminin                                                                                       | 57441  | 2.94  | 3.09  | 3.37  | 0.87 | 0.11 ns  |
| Cyb561        | cytochrome b-561                                                                              | 13056  | 0.98  | 1.23  | 1.49  | 0.65 | -0.68 ns |
| Vps4a         | vacuolar protein sorting 4a (yeast)                                                           | 116733 | 0.78  | 0.80  | 0.63  | 1.23 | 0.83 *   |
| Lyar          | Ly1 antibody reactive clone                                                                   | 17089  | 0.99  | 1.25  | 0.98  | 1.00 | 0.35 ns  |
| Evi5          | ecotropic viral integration site 5                                                            | 14020  | 0.64  | 0.60  | 0.77  | 0.83 | -0.81 *  |
| Lsm10         | U7 snRNP-specific Sm-like protein LSM10                                                       | 116748 | 0.63  | 0.58  | 0.72  | 0.87 | -0.38 ns |
| Ddit3         | DNA-damage inducible transcript 3                                                             | 13198  | 0.45  | 0.73  | 0.51  | 0.88 | -0.39 ns |
| Plagl2        | pleiomorphic adenoma gene-like 2                                                              | 54711  | 0.31  | 0.35  | 0.36  | 0.85 | -0.47 ns |
| Srp9          | signal recognition particle 9                                                                 | 27058  | 1.94  | 2.19  | 2.10  | 0.92 | -0.55 ns |
| Itgb5         | integrin beta 5                                                                               | 16419  | 4.32  | 3.70  | 3.47  | 1.24 | 0.91 *   |
| Fbxo25        | F-box protein 25                                                                              | 66822  | 0.60  | 0.64  | 0.62  | 0.96 | 0.39 ns  |
| Zmat2         | zinc finger, matrin type 2                                                                    | 66492  | 1.04  | 1.28  | 1.30  | 0.79 | 0.01 ns  |
| Slc35a1       | solute carrier family 35 (CMP-sialic acid transporter), member 1                              | 24060  | 0.82  | 0.74  | 0.80  | 1.02 | -0.17 ns |
| Elf1          | E74-like factor 1                                                                             | 13709  | 1.41  | 1.64  | 1.95  | 0.72 | -0.90 *  |
| Hells         | helicase, lymphoid specific                                                                   | 15201  | 3.94  | 4.73  | 3.76  | 1.04 | 0.24 ns  |
| Trpv4         | transient receptor potential cation channel, subfamily V, member 4                            | 63873  | 1.40  | 1.00  | 0.81  | 1.73 | 0.68 ns  |
| Sart3         | squamous cell carcinoma antigen recognized by T-cells 3                                       | 53890  | 0.94  | 1.00  | 0.99  | 0.95 | -0.11 ns |
| Sfxn1         | sideroflexin 1                                                                                | 14057  | 1.83  | 1.59  | 1.07  | 1.70 | 0.98 *** |
| Mpg           | N-methylpurine-DNA glycosylase                                                                | 268395 | 0.34  | 0.36  | 0.52  | 0.65 | -0.38 ns |
| 2010311D03Rik | RIKEN cDNA 2010311D03 gene                                                                    | 109129 | 2.34  | 1.94  | 1.83  | 1.27 | 0.54 ns  |
| Nup210        | nucleoporin 210                                                                               | 54563  | 1.18  | 1.42  | 1.12  | 1.05 | -0.34 ns |
| Timeless      | timeless homolog (Drosophila)                                                                 | 21853  | 2.55  | 2.33  | 1.83  | 1.38 | 0.31 ns  |
| Galnt3        | UDP-N-acetyl-alpha-D-galactosamine:polypeptide N-acetylgalactosaminyltransferase 3            | 14425  | 1.45  | 1.60  | 1.17  | 1.23 | 0.12 ns  |
| Ptges2        | prostaglandin E synthase 2                                                                    | 96979  | 0.38  | 0.35  | 0.29  | 1.32 | -0.01 ns |
| Frap1         | FK506 binding protein 12-rapamycin associated protein 1                                       | 56717  | 0.72  | 0.72  | 0.79  | 0.91 | -0.75 ns |
| Tusc2         | tumor suppressor candidate 2                                                                  | 80385  | 0.27  | 0.32  | 0.26  | 1.05 | 0.52 ns  |
| Cd276         | CD276 antigen                                                                                 | 102657 | 0.61  | 0.69  | 0.47  | 1.28 | 0.66 ns  |
| Per2          | period homolog 2 (Drosophila)                                                                 | 18627  | 0.45  | 0.38  | 0.26  | 1.74 | 0.27 ns  |
| Camk1         |                                                                                               | 52163  | 0.54  | 0.59  | 0.75  | 0.72 | -0.45 ns |
| Calr          | calreticulin                                                                                  | 12317  | 7.92  | 8.40  | 5.87  | 1.34 | 0.76 ns  |
| Ier5          | immediate early response 5                                                                    | 15939  | 1.15  | 1.34  | 0.93  | 1.22 | -0.10 ns |
| Rpl11         | ribosomal protein L11                                                                         | 67025  | 11.46 | 10.34 | 10.89 | 1.05 | -0.14 ns |

|               |                                                                                                               |        |       |       |       |      |          |
|---------------|---------------------------------------------------------------------------------------------------------------|--------|-------|-------|-------|------|----------|
| St6galnac2    | ST6 (alpha-N-acetyl-neuraminy1-2,3-beta-galactosyl-1,3)-N-acetylgalactosaminide alpha-2,6-sialyltransferase 2 | 20446  | 1.03  | 1.15  | 0.90  | 1.14 | 0.33 ns  |
| Gadd45gip1    | growth arrest and DNA-damage-inducible, gamma interacting protein 1                                           | 102060 | 0.60  | 0.58  | 0.63  | 0.94 | -0.29 ns |
| Slc12a2       | solute carrier family 12, member 2                                                                            | 20496  | 2.30  | 3.06  | 3.32  | 0.69 | -0.71 ns |
| Nab1          | Ngfi-A binding protein 1                                                                                      | 17936  | 2.69  | 2.83  | 2.47  | 1.08 | 0.02 ns  |
| Cxcr7         | chemokine (C-X-C motif) receptor 7                                                                            | 12778  | 0.68  | 0.85  | 0.07  | 9.19 | 0.51 ns  |
| Supt6h        | suppressor of Ty 6 homolog (S. cerevisiae)                                                                    | 20926  | 0.63  | 0.72  | 0.46  | 1.36 | 0.32 ns  |
| Atp6v0a1      | ATPase, H+ transporting, lysosomal V0 subunit A1                                                              | 11975  | 0.62  | 0.51  | 0.53  | 1.16 | 0.58 ns  |
| Slc6a9        | solute carrier family 6 (neurotransmitter transporter, glycine), member 9                                     | 14664  | 0.41  | 0.53  | 0.54  | 0.76 | -0.87 *  |
| Hmg20b        | high mobility group 20 B                                                                                      | 15353  | 0.86  | 0.89  | 0.82  | 1.05 | -0.20 ns |
| Tbca          | tubulin cofactor a                                                                                            | 21371  | 4.56  | 5.73  | 6.62  | 0.69 | -0.70 ns |
| Sdc4          | syndecan 4                                                                                                    | 20971  | 4.86  | 4.92  | 4.05  | 1.19 | 0.58 ns  |
| Ars2          | arsenate resistance protein 2                                                                                 | 83701  | 1.74  | 1.48  | 1.35  | 1.29 | 0.68 ns  |
| Mybl2         | myeloblastosis oncogene-like 2                                                                                | 17865  | 0.56  | 0.69  | 0.82  | 0.67 | -0.34 ns |
| Dnajc2        | DnaJ (Hsp40) homolog, subfamily C, member 2                                                                   | 22791  | 1.22  | 1.57  | 1.45  | 0.84 | -0.05 ns |
| Vps29         | vacuolar protein sorting 29 (S. pombe)                                                                        | 56433  | 4.55  | 4.63  | 4.76  | 0.95 | 0.03 ns  |
| Rdm1          | RAD52 motif 1                                                                                                 | 66599  | 0.66  | 0.78  | 0.96  | 0.69 | 0.00 ns  |
| Ndrg3         | N-myc downstream regulated gene 3                                                                             | 29812  | 0.73  | 0.62  | 0.79  | 0.92 | -0.21 ns |
| Cpsf1         | cleavage and polyadenylation specific factor 1                                                                | 94230  | 2.88  | 2.57  | 3.24  | 0.88 | 0.05 ns  |
| Dntip1        | deoxynucleotidyltransferase, terminal, interacting protein 1                                                  | 76233  | 2.13  | 2.05  | 2.37  | 0.89 | -0.52 ns |
| Abhd12        | abhydrolase domain containing 12                                                                              | 76192  | 0.79  | 0.82  | 0.66  | 1.18 | 0.08 ns  |
| Golga4        | golgi autoantigen, golgin subfamily a, 4                                                                      | 54214  | 1.49  | 1.37  | 1.53  | 0.97 | 0.31 ns  |
| Nudt21        | nudix (nucleoside diphosphate linked moiety X)-type motif 21                                                  | 68219  | 4.92  | 4.74  | 4.95  | 0.99 | 0.47 ns  |
| Diablo        | diablo homolog (Drosophila)                                                                                   | 66593  | 1.07  | 0.98  | 1.04  | 1.02 | -0.33 ns |
| Thumpd3       | THUMP domain containing 3                                                                                     | 14911  | 1.00  | 1.04  | 1.17  | 0.86 | -0.90 *  |
| Ankyf1        | ankyrin repeat and FYVE domain containing 1                                                                   | 11736  | 1.25  | 1.26  | 1.46  | 0.85 | -0.59 ns |
| BC004044      | cDNA sequence BC004044                                                                                        | 80752  | 3.24  | 3.14  | 1.58  | 2.04 | 0.30 ns  |
| Pdzk1ip1      | PDZK1 interacting protein 1                                                                                   | 67182  | 4.23  | 4.21  | 4.43  | 0.95 | -0.28 ns |
| Prkg1         | protein kinase, AMP-activated, gamma 1 non-catalytic subunit                                                  | 19082  | 1.26  | 1.13  | 1.18  | 1.06 | -0.08 ns |
| Bin3          | bridging integrator 3                                                                                         | 57784  | 1.10  | 1.15  | 1.28  | 0.86 | -0.49 ns |
| Drg2          | developmentally regulated GTP binding protein 2                                                               | 13495  | 1.00  | 0.78  | 0.99  | 1.01 | 0.23 ns  |
| Gab1          | growth factor receptor bound protein 2-associated protein 1                                                   | 14388  | 0.81  | 0.95  | 0.63  | 1.28 | 0.21 ns  |
| Soat1         | sterol O-acyltransferase 1                                                                                    | 20652  | 1.35  | 1.30  | 0.76  | 1.77 | -0.22 ns |
| Gtf2f1        | general transcription factor IIF, polypeptide 1                                                               | 98053  | 1.09  | 1.20  | 0.71  | 1.53 | 0.79 ns  |
| Pvrl2         | poliovirus receptor-related 2                                                                                 | 19294  | 1.09  | 1.24  | 1.28  | 0.84 | -0.46 ns |
| Otu1          | OTU domain, ubiquitin aldehyde binding 1                                                                      | 107260 | 1.32  | 1.14  | 0.89  | 1.47 | 0.83 *   |
| Naglu         | alpha-N-acetylglucosaminidase (Sanfilippo disease IIB)                                                        | 27419  | 0.41  | 0.49  | 0.73  | 0.56 | -0.45 ns |
| Mettl9        | methyltransferase like 9                                                                                      | 59052  | 3.38  | 3.06  | 3.77  | 0.89 | -0.40 ns |
| Eif2s2        | eukaryotic translation initiation factor 2, subunit 2 (beta)                                                  | 67204  | 12.01 | 11.94 | 12.44 | 0.96 | 0.04 ns  |
| Got2          | glutamate oxaloacetate transaminase 2, mitochondrial                                                          | 14719  | 5.93  | 5.22  | 4.86  | 1.21 | 0.82 *   |
| Sap30         | sin3 associated polypeptide                                                                                   | 60406  | 1.45  | 1.85  | 2.34  | 0.62 | -0.30 ns |
| Polr2j        | polymerase (RNA) II (DNA directed) polypeptide J                                                              | 20022  | 2.19  | 2.04  | 2.17  | 1.00 | 0.35 ns  |
| Pgls          | 6-phosphogluconolactonase                                                                                     | 66171  | 1.60  | 1.78  | 1.93  | 0.83 | -0.32 ns |
| Ube2j1        | ubiquitin-conjugating enzyme E2, J1                                                                           | 56228  | 0.51  | 0.50  | 0.47  | 1.06 | 0.30 ns  |
| Thoc4         | THO complex 4                                                                                                 | 21681  | 5.55  | 5.33  | 5.58  | 0.99 | 0.50 ns  |
| Ssca1         | Sjogren's syndrome/scleroderma autoantigen 1 homolog (human)                                                  | 56390  | 1.87  | 1.66  | 1.27  | 1.47 | 0.95 **  |
| Sfrs9         | splicing factor, arginine/serine rich 9                                                                       | 108014 | 3.62  | 3.41  | 4.80  | 0.75 | -0.38 ns |
| Mbd3          | methyl-CpG binding domain protein 3                                                                           | 17192  | 0.75  | 0.80  | 0.70  | 1.07 | 0.62 ns  |
| Ext1          | exostoses (multiple) 1                                                                                        | 14042  | 1.53  | 1.18  | 1.88  | 0.81 | -0.44 ns |
| Rnf146        | ring finger protein 146                                                                                       | 68031  | 1.86  | 1.76  | 1.39  | 1.34 | 0.23 ns  |
| Akap8l        | A kinase (PRKA) anchor protein 8-like                                                                         | 54194  | 0.51  | 0.38  | 0.31  | 1.65 | 0.96 **  |
| Mrps31        | mitochondrial ribosomal protein S31                                                                           | 57312  | 0.56  | 0.64  | 0.73  | 0.76 | -0.27 ns |
| Rab25         | RAB25, member RAS oncogene family                                                                             | 53868  | 3.09  | 2.99  | 2.56  | 1.20 | 0.36 ns  |
| Med11         | mediator of RNA polymerase II transcription, subunit 11 homolog (S. cerevisiae)                               | 66172  | 0.41  | 0.51  | 0.58  | 0.71 | -0.83 *  |
| Dmap1         | DNA methyltransferase 1-associated protein 1                                                                  | 66233  | 0.39  | 0.37  | 0.40  | 0.97 | 0.39 ns  |
| Clk2          | CDC-like kinase 2                                                                                             | 12748  | 1.77  | 1.88  | 1.50  | 1.17 | 0.15 ns  |
| Tjp1          | tight junction protein 1                                                                                      | 21872  | 3.04  | 2.99  | 3.51  | 0.86 | -0.80 ns |
| Slc25a37      | solute carrier family 25, member 37                                                                           | 67712  | 0.75  | 0.93  | 1.25  | 0.60 | -0.77 ns |
| Stk10         | serine/threonine kinase 10                                                                                    | 20868  | 0.35  | 0.44  | 0.57  | 0.62 | -0.97 ** |
| Unc13b        | unc-13 homolog B (C. elegans)                                                                                 | 22249  | 0.49  | 0.56  | 0.68  | 0.71 | -0.51 ns |
| Itga2b        | integrin alpha 2b                                                                                             | 16399  | 0.38  | 0.36  | 0.26  | 1.46 | 0.86 *   |
| Rpl8          | ribosomal protein L8                                                                                          | 26961  | 20.33 | 19.00 | 17.43 | 1.16 | 0.75 ns  |
| LOC636537     |                                                                                                               | 636537 | 3.67  | 3.78  | 4.53  | 0.81 | -0.27 ns |
| Ssr1          |                                                                                                               | 107513 | 3.67  | 3.78  | 4.53  | 0.81 | -0.27 ns |
| Cyb5b         | cytochrome b5 type B                                                                                          | 66427  | 3.43  | 3.42  | 2.61  | 1.31 | 0.61 ns  |
| Pnpla8        | patatin-like phospholipase domain containing 8                                                                | 67452  | 1.62  | 1.66  | 2.22  | 0.73 | -0.71 ns |
| Psmc6         | proteasome (prosome, macropain) 26S subunit, ATPase, 6                                                        | 67089  | 1.34  | 1.37  | 0.98  | 1.36 | 0.49 ns  |
| Psmc6         | proteasome (prosome, macropain) 26S subunit, ATPase, 6                                                        | 67089  | 3.28  | 2.92  | 3.48  | 0.94 | -0.38 ns |
| Grhpr         | glyoxylate reductase/hydroxypruvate reductase                                                                 | 76238  | 0.61  | 0.63  | 0.79  | 0.77 | -0.77 ns |
| Nans          | N-acetylneuraminic acid synthase (sialic acid synthase)                                                       | 94181  | 0.90  | 0.90  | 1.53  | 0.59 | -0.61 ns |
| Zfp35         | zinc finger protein 35                                                                                        | 22694  | 0.53  | 0.67  | 0.50  | 1.05 | 0.42 ns  |
| Als2          | amyotrophic lateral sclerosis 2 (juvenile) homolog (human)                                                    | 74018  | 0.40  | 0.38  | 0.33  | 1.20 | 0.90 *   |
| Rgs19         | regulator of G-protein signaling 19                                                                           | 56470  | 0.49  | 0.53  | 0.55  | 0.89 | -0.32 ns |
| Zfml          | zinc finger, matrin-like                                                                                      | 18139  | 1.20  | 1.33  | 1.33  | 0.90 | -0.66 ns |
| Gps2          | G protein pathway suppressor 2                                                                                | 56310  | 0.70  | 0.66  | 0.62  | 1.12 | 0.56 ns  |
| 1810019J16Rik | RIKEN cDNA 1810019J16 gene                                                                                    | 69073  | 0.48  | 0.66  | 0.76  | 0.63 | -0.89 *  |
| Parp2         | poly (ADP-ribose) polymerase family, member 2                                                                 | 11546  | 0.87  | 1.02  | 1.01  | 0.86 | -0.03 ns |
| Kcnn1         |                                                                                                               | 16500  | 5.43  | 5.26  | 4.93  | 1.09 | 0.75 ns  |
| Pacsin2       |                                                                                                               | 23970  | 5.43  | 5.26  | 4.93  | 1.09 | 0.75 ns  |
| Lamb3         | laminin, beta 3                                                                                               | 16780  | 1.59  | 1.86  | 1.25  | 1.27 | 0.67 ns  |
| Wwtr1         | WW domain containing transcription regulator 1                                                                | 97064  | 4.53  | 3.63  | 3.42  | 1.32 | 0.74 ns  |
| Gcat          | glycine C-acetyltransferase (2-amino-3-ketobutyrate-coenzyme A ligase)                                        | 26912  | 0.84  | 0.84  | 0.52  | 1.62 | 0.76 ns  |
| Esd           | esterase D/formylglutathione hydrolase                                                                        | 13885  | 5.92  | 5.34  | 6.21  | 0.95 | -0.26 ns |
| Akr1e1        | aldo-keto reductase family 1, member E1                                                                       | 56043  | 0.62  | 0.54  | 0.51  | 1.21 | 0.67 ns  |
| Ngly1         | N-glycanase 1                                                                                                 | 59007  | 0.74  | 0.68  | 0.73  | 1.01 | -0.09 ns |

|               |                                                                                              |        |       |       |       |      |          |
|---------------|----------------------------------------------------------------------------------------------|--------|-------|-------|-------|------|----------|
| Rab15         | RAB15, member RAS oncogene family                                                            | 104886 | 0.80  | 1.07  | 1.80  | 0.44 | -0.87 *  |
| Smc1a         | structural maintenance of chromosomes 1A                                                     | 24061  | 2.15  | 2.85  | 3.64  | 0.59 | -0.03 ns |
| Zc3h10        | zinc finger CCHC type containing 10                                                          | 103284 | 0.40  | 0.39  | 0.36  | 1.09 | 0.42 ns  |
| 1500031L02Rik | RIKEN cDNA 1500031L02 gene                                                                   | 66994  | 1.21  | 1.36  | 1.18  | 1.03 | -0.33 ns |
| Cam1          | calcium modulating ligand                                                                    | 12328  | 1.00  | 1.09  | 1.12  | 0.89 | -0.18 ns |
| Eps8l2        | EPS8-like 2                                                                                  | 98845  | 1.27  | 1.04  | 0.95  | 1.33 | 0.18 ns  |
| Med4          | mediator of RNA polymerase II transcription, subunit 4 homolog (yeast)                       | 67381  | 0.80  | 0.81  | 0.95  | 0.84 | -0.03 ns |
| Cldn6         | claudin 6                                                                                    | 54419  | 4.38  | 3.49  | 2.18  | 2.00 | 0.85 *   |
| Ulk2          | Unc-51 like kinase 2 (C. elegans)                                                            | 29869  | 0.31  | 0.33  | 0.40  | 0.77 | -0.65 ns |
| Rb1           | retinoblastoma 1                                                                             | 19645  | 1.08  | 1.05  | 1.82  | 0.59 | -0.71 ns |
| Map2k5        | mitogen activated protein kinase kinase 5                                                    | 23938  | 0.61  | 0.55  | 0.44  | 1.35 | 0.94 **  |
| Pgk1          |                                                                                              | 18655  | 15.76 | 15.02 | 20.42 | 0.77 | -0.38 ns |
| Ctsz          | cathepsin Z                                                                                  | 64138  | 1.27  | 2.19  | 2.99  | 0.42 | -0.64 ns |
| Fhl1          | four and a half LIM domains 1                                                                | 14199  | 0.50  | 1.16  | 0.21  | 2.31 | 0.32 ns  |
| Pwp1          | PWP1 homolog (S. cerevisiae)                                                                 | 103136 | 1.53  | 1.64  | 1.27  | 1.19 | 0.29 ns  |
| Ddx50         | DEAD (Asp-Glu-Ala-Asp) box polypeptide 50                                                    | 94213  | 2.40  | 2.30  | 2.06  | 1.16 | 0.67 ns  |
| Nenf          | neuron derived neurotrophic factor                                                           | 66208  | 0.57  | 0.55  | 0.50  | 1.14 | 0.72 ns  |
| 1810009A15Rik | RIKEN cDNA 1810009A15 gene                                                                   | 66276  | 1.20  | 1.55  | 1.41  | 0.85 | -0.26 ns |
| Spsb3         | splA/ryanodine receptor domain and SOCS box containing 3                                     | 79043  | 0.56  | 0.58  | 0.50  | 1.12 | 0.61 ns  |
| Sfxn3         | sideroflexin 3                                                                               | 94280  | 1.16  | 1.09  | 0.90  | 1.29 | 0.83 *   |
| Gpr97         | G protein-coupled receptor 97                                                                | 54672  | 0.38  | 0.43  | 0.26  | 1.44 | 0.76 ns  |
| Tmem54        | transmembrane protein 54                                                                     | 66260  | 0.72  | 0.73  | 1.04  | 0.69 | -0.63 ns |
| Tjp3          | tight junction protein 3                                                                     | 27375  | 1.06  | 1.11  | 1.04  | 1.02 | -0.50 ns |
| Brrs1         | breast cancer metastasis-suppressor 1                                                        | 107392 | 0.66  | 0.66  | 0.44  | 1.50 | 0.83 *   |
| Slc19a2       | solute carrier family 19 (thiamine transporter), member 2                                    | 116914 | 0.33  | 0.31  | 0.43  | 0.76 | -0.79 ns |
| Dclre1a       | DNA cross-link repair 1A, PSO2 homolog (S. cerevisiae)                                       | 55947  | 0.65  | 0.70  | 0.70  | 0.92 | -0.08 ns |
| Ccna2         | cyclin A2                                                                                    | 12428  | 6.44  | 5.97  | 5.72  | 1.12 | 0.71 ns  |
| Gins4         | GINS complex subunit 4 (Sld5 homolog)                                                        | 109145 | 1.76  | 2.07  | 2.23  | 0.79 | -0.24 ns |
| Rap2b         | RAP2B, member of RAS oncogene family                                                         | 74012  | 0.63  | 0.54  | 0.59  | 1.07 | -0.45 ns |
| Fxc1          | fractured callus expressed transcript 1                                                      | 14356  | 1.45  | 1.44  | 1.61  | 0.90 | -0.40 ns |
| Ppp17         | protein phosphatase 1, regulatory (inhibitor) subunit 7                                      | 66385  | 0.68  | 0.70  | 0.73  | 0.93 | -0.33 ns |
| 2610029G23Rik | RIKEN cDNA 2610029G23 gene                                                                   | 67683  | 1.14  | 1.35  | 1.91  | 0.59 | -0.60 ns |
| Kbtbd4        | kelch repeat and BTB (POZ) domain containing 4                                               | 67136  | 0.40  | 0.31  | 0.34  | 1.16 | 0.13 ns  |
| Ncagp2        | non-SMC condensin II complex, subunit G2                                                     | 76044  | 3.68  | 3.80  | 4.03  | 0.91 | 0.21 ns  |
| Ddx19a        | DEAD (Asp-Glu-Ala-Asp) box polypeptide 19a                                                   | 13680  | 1.24  | 1.12  | 0.80  | 1.54 | 0.77 ns  |
| Nab2          | Ngfi-A binding protein 2                                                                     | 17937  | 1.31  | 0.96  | 1.10  | 1.19 | -0.01 ns |
| Ndst2         | N-deacetylase/N-sulfotransferase (heparan glucosaminyl) 2                                    | 17423  | 0.49  | 0.35  | 0.37  | 1.29 | 0.79 ns  |
| Dnajc4        | DnaJ (Hsp40) homolog, subfamily C, member 4                                                  | 57431  | 0.50  | 0.44  | 0.47  | 1.06 | 0.25 ns  |
| Mkrm2         | makorin, ring finger protein, 2                                                              | 67027  | 0.74  | 0.79  | 0.82  | 0.91 | -0.77 ns |
| Rad51ap1      | RAD51 associated protein 1                                                                   | 19362  | 1.25  | 1.42  | 1.72  | 0.72 | -0.21 ns |
| Nanp          | N-acetylneuraminic acid phosphatase                                                          | 67311  | 1.17  | 1.06  | 1.21  | 0.96 | -0.29 ns |
| Lypd3         | Ly6/Plaur domain containing 3                                                                | 72434  | 0.30  | 0.32  | 0.79  | 0.37 | -0.74 ns |
| Pcna          | proliferating cell nuclear antigen                                                           | 18538  | 18.13 | 16.88 | 16.53 | 1.09 | 0.55 ns  |
| Ccdc71        | coiled-coil domain containing 71                                                             | 72454  | 0.62  | 0.48  | 0.56  | 1.10 | 0.58 ns  |
| Tspan1        | tetraspanin 1                                                                                | 66805  | 2.56  | 1.90  | 2.34  | 1.09 | -0.12 ns |
| Ghr           | growth hormone receptor                                                                      | 14600  | 1.26  | 0.40  | 0.32  | 3.92 | 0.37 ns  |
| Ap3d1         | adaptor-related protein complex 3, delta 1 subunit                                           | 11776  | 1.51  | 1.59  | 1.13  | 1.34 | 0.29 ns  |
| Plekha1       | pleckstrin homology domain containing, family A (phosphoinositide binding specific) member 1 | 101476 | 1.08  | 1.09  | 1.32  | 0.82 | -0.72 ns |
| Mbd1          | methyl-CpG binding domain protein 1                                                          | 17190  | 1.61  | 1.78  | 1.66  | 0.97 | 0.30 ns  |
| Atp5s         | ATP synthase, H+ transporting, mitochondrial F0 complex, subunit s                           | 68055  | 0.45  | 0.43  | 0.35  | 1.29 | 0.82 *   |
| Nrm           | nurim (nuclear envelope membrane protein)                                                    | 106582 | 1.87  | 1.58  | 1.45  | 1.28 | 0.83 *   |
| Pop5          | processing of precursor 5, ribonuclease P/MRP family (S. cerevisiae)                         | 117109 | 1.20  | 1.17  | 1.29  | 0.93 | -0.02 ns |
| Kpna4         | karyopherin (importin) alpha 4                                                               | 16649  | 1.72  | 1.79  | 1.60  | 1.07 | -0.21 ns |
| Insig2        | insulin induced gene 2                                                                       | 72999  | 0.86  | 0.81  | 0.83  | 1.03 | 0.54 ns  |
| Ube2v2        | ubiquitin-conjugating enzyme E2 variant 2                                                    | 70620  | 1.70  | 1.57  | 1.85  | 0.92 | -0.23 ns |
| Nrarp         | Notch-regulated ankyrin repeat protein                                                       | 67122  | 0.57  | 0.63  | 0.67  | 0.84 | -0.22 ns |
| Btd           | biotinidase                                                                                  | 26363  | 0.58  | 0.56  | 0.64  | 0.90 | 0.02 ns  |
| Ptges3        | prostaglandin E synthase 3 (cytosolic)                                                       | 56351  | 9.51  | 9.04  | 8.43  | 1.12 | 0.14 ns  |
| Itn2b         | integral membrane protein 2B                                                                 | 16432  | 8.72  | 7.46  | 11.68 | 0.74 | -0.65 ns |
| Higd2a        | HIG1 domain family, member 2A                                                                | 67044  | 4.57  | 4.28  | 5.60  | 0.81 | -0.41 ns |
| Tmem176b      | transmembrane protein 176B                                                                   | 65963  | 0.75  | 1.20  | 2.24  | 0.33 | -0.65 ns |
| Sdhb          | succinate dehydrogenase complex, subunit B, iron sulfur (lp)                                 | 67680  | 2.53  | 2.72  | 2.60  | 0.97 | -0.03 ns |
| 1810007M14Rik | RIKEN cDNA 1810007M14 gene                                                                   | 67367  | 2.53  | 1.72  | 2.38  | 1.06 | -0.24 ns |
| Sh3glb1       | SH3-domain GRB2-like B1 (endophilin)                                                         | 54673  | 3.50  | 3.24  | 3.37  | 1.03 | -0.33 ns |
| B4galt1       | UDP-Gal:betaGlcNAc beta 1,4-galactosyltransferase, polypeptide 1                             | 14595  | 0.61  | 0.71  | 0.83  | 0.73 | -0.70 ns |
| Pum2          | pumilio 2 (Drosophila)                                                                       | 80913  | 4.96  | 4.58  | 4.77  | 1.03 | 0.45 ns  |
| Narg1         | NMDA receptor-regulated gene 1                                                               | 74838  | 2.73  | 2.78  | 2.39  | 1.13 | 0.41 ns  |
| Bhlhb2        | basic helix-loop-helix domain containing, class B2                                           | 20893  | 1.66  | 1.97  | 2.59  | 0.64 | -0.43 ns |
| Exo1          | exonuclease 1                                                                                | 26909  | 0.55  | 0.56  | 0.59  | 0.92 | -0.57 ns |
| Faim          | Fas apoptotic inhibitory molecule                                                            | 23873  | 0.62  | 0.67  | 0.61  | 1.01 | 0.53 ns  |
| Myo9b         | myosin IXb                                                                                   | 17925  | 0.74  | 0.71  | 0.85  | 0.87 | 0.21 ns  |
| Iitg2         | integrin alpha FG-GAP repeat containing 2                                                    | 101142 | 0.38  | 0.33  | 0.27  | 1.44 | 0.78 ns  |
| Prim2         | DNA primase, p58 subunit                                                                     | 19076  | 1.09  | 0.98  | 0.89  | 1.22 | 0.81 ns  |
| Rabl3         | RAB, member of RAS oncogene family-like 3                                                    | 67657  | 0.71  | 0.55  | 0.61  | 1.17 | 0.02 ns  |
| Abcc5         | ATP-binding cassette, sub-family C (CFTR/MRP), member 5                                      | 27416  | 0.44  | 0.40  | 0.34  | 1.31 | 0.74 ns  |
| A630042L21Rik | RIKEN cDNA A630042L21 gene                                                                   | 106894 | 0.43  | 0.42  | 0.43  | 1.01 | 0.50 ns  |
| 1110059G10Rik | RIKEN cDNA 1110059G10 gene                                                                   | 66202  | 1.06  | 0.98  | 1.03  | 1.03 | 0.57 ns  |
| Mvk           | mevalonate kinase                                                                            | 17855  | 0.40  | 0.30  | 0.22  | 1.75 | 0.87 *   |
| Tiam1         | T-cell lymphoma invasion and metastasis 1                                                    | 21844  | 2.63  | 2.60  | 2.39  | 1.10 | 0.60 ns  |
| Mapk7         | mitogen activated protein kinase 7                                                           | 23939  | 0.25  | 0.25  | 0.37  | 0.68 | -0.85 *  |
| Cfl2          | cofilin 2, muscle                                                                            | 12632  | 2.22  | 1.98  | 1.96  | 1.12 | 0.59 ns  |
| Cdyl          | chromodomain protein, Y chromosome-like                                                      | 12593  | 0.58  | 0.60  | 0.76  | 0.76 | -0.58 ns |
| Hist1h2bc     | histone cluster 1, H2bc                                                                      | 68024  | 1.09  | 1.02  | 0.98  | 1.11 | 0.40 ns  |

|               |                                                                               |        |       |       |       |      |           |
|---------------|-------------------------------------------------------------------------------|--------|-------|-------|-------|------|-----------|
| St14          | suppression of tumorigenicity 14 (colon carcinoma)                            | 19143  | 5.26  | 5.17  | 4.08  | 1.28 | 0.78 ns   |
| Psme3         | proteasome (prosome, macropain) 28 subunit, 3                                 | 19192  | 0.86  | 0.84  | 0.81  | 1.06 | 0.28 ns   |
| 0610009B22Rik | RIKEN cDNA 0610009B22 gene                                                    | 66050  | 1.94  | 1.72  | 2.11  | 0.91 | -0.53 ns  |
| Prkc2         | protein kinase C, zeta                                                        | 18762  | 0.55  | 0.51  | 0.51  | 1.07 | -0.17 ns  |
| Ufd1l         | ubiquitin fusion degradation 1 like                                           | 22230  | 1.13  | 1.04  | 1.23  | 0.91 | -0.73 ns  |
| Stx8          | syntaxin 8                                                                    | 55943  | 0.78  | 0.85  | 0.94  | 0.83 | -0.10 ns  |
| Tcfcp2l1      | transcription factor CP2-like 1                                               | 81879  | 4.44  | 4.31  | 3.19  | 1.38 | 0.85 *    |
| Trip10        | thyroid hormone receptor interactor 10                                        | 106628 | 1.92  | 2.17  | 1.78  | 1.08 | 0.60 ns   |
| Rtn3          | reticulon 3                                                                   | 20168  | 7.50  | 7.06  | 5.31  | 1.41 | 0.78 ns   |
| Hes1          | hairy and enhancer of split 1 (Drosophila)                                    | 15205  | 0.83  | 0.80  | 0.58  | 1.42 | 0.74 ns   |
| Slc12a9       | solute carrier family 12 (potassium/chloride transporters), member 9          | 83704  | 0.31  | 0.36  | 0.38  | 0.82 | -0.33 ns  |
| Mrp10         | mitochondrial ribosomal protein L10                                           | 107732 | 1.51  | 1.24  | 1.56  | 0.96 | -0.06 ns  |
| Ifrg15        | interferon alpha responsive gene                                              | 64164  | 3.53  | 2.87  | 2.64  | 1.33 | 0.49 ns   |
| Rbm8a         | RNA binding motif protein 8a                                                  | 60365  | 5.39  | 6.18  | 4.61  | 1.16 | 0.37 ns   |
| Vrk3          | vaccinia related kinase 3                                                     | 101568 | 1.12  | 1.03  | 1.18  | 0.94 | -0.06 ns  |
| Unc119        | unc-119 homolog (C. elegans)                                                  | 22248  | 0.59  | 0.65  | 0.48  | 1.22 | 0.31 ns   |
| Tmem85        | transmembrane protein 85                                                      | 68032  | 1.64  | 1.24  | 1.55  | 1.05 | 0.42 ns   |
| Aifm1         | apoptosis-inducing factor, mitochondrion-associated 1                         | 26926  | 0.97  | 0.85  | 1.26  | 0.77 | -0.45 ns  |
| Adcy6         | adenylate cyclase 6                                                           | 11512  | 2.04  | 1.57  | 1.50  | 1.35 | 0.17 ns   |
| Slc25a46      | solute carrier family 25, member 46                                           | 67453  | 2.09  | 2.25  | 2.32  | 0.90 | 0.19 ns   |
| Aff1          | AF4/FMR2 family, member 1                                                     | 17355  | 1.11  | 1.08  | 0.97  | 1.14 | -0.10 ns  |
| Mrp63         | mitochondrial ribosomal protein 63                                            | 67840  | 1.45  | 1.50  | 1.84  | 0.78 | -0.74 ns  |
| Vps45         | vacuolar protein sorting 45 (yeast)                                           | 22365  | 0.49  | 0.55  | 0.49  | 1.00 | -0.27 ns  |
| Pip5k1a       | phosphatidylinositol-4-phosphate 5-kinase, type 1 alpha                       | 18720  | 1.41  | 1.62  | 1.15  | 1.22 | 0.28 ns   |
| Nsbp1         | nucleosome binding protein 1                                                  | 50887  | 1.14  | 1.28  | 1.86  | 0.61 | -0.74 ns  |
| BC004022      | cDNA sequence BC004022                                                        | 80750  | 0.57  | 0.51  | 0.71  | 0.80 | -0.19 ns  |
| Tcfcp2        | transcription factor CP2                                                      | 21422  | 0.62  | 0.52  | 0.62  | 0.99 | -0.13 ns  |
| Stx2          | syntaxin 2                                                                    | 13852  | 0.44  | 0.46  | 0.46  | 0.95 | 0.21 ns   |
| Tcfap4        | transcription factor AP4                                                      | 83383  | 0.41  | 0.43  | 0.42  | 0.96 | -0.48 ns  |
| Zcchc14       | zinc finger, CCHC domain containing 14                                        | 142682 | 0.84  | 0.68  | 0.52  | 1.59 | 0.86 *    |
| Sp1           | trans-acting transcription factor 1                                           | 20683  | 5.18  | 5.55  | 4.72  | 1.09 | 0.59 ns   |
| Cenpm         | centromere protein M                                                          | 66570  | 0.68  | 0.75  | 1.02  | 0.66 | -0.29 ns  |
| 4733401H18Rik | RIKEN cDNA 4733401H18 gene                                                    | 66706  | 0.67  | 0.64  | 0.72  | 0.92 | 0.00 ns   |
| Gstt1         | glutathione S-transferase, theta 1                                            | 14871  | 0.40  | 0.63  | 0.62  | 0.64 | -0.16 ns  |
| Mnt           | max binding protein                                                           | 17428  | 0.82  | 1.01  | 0.94  | 0.87 | -0.31 ns  |
| Tep1          | telomerase associated protein 1                                               | 21745  | 0.32  | 0.26  | 0.30  | 1.06 | -0.18 ns  |
| Tm9sf1        | transmembrane 9 superfamily member 1                                          | 74140  | 2.10  | 1.95  | 2.51  | 0.83 | -0.65 ns  |
| Plekhg2       | pleckstrin homology domain containing, family G (with RhoGef domain) member 2 | 101497 | 0.66  | 0.69  | 0.71  | 0.93 | -0.47 ns  |
| Pmaip1        | phorbol-12-myristate-13-acetate-induced protein 1                             | 58801  | 1.12  | 1.34  | 2.18  | 0.51 | -0.52 ns  |
| Sdf2l1        | stromal cell-derived factor 2-like 1                                          | 64136  | 0.68  | 0.69  | 0.72  | 0.95 | 0.31 ns   |
| Fxyd4         | FXD domain-containing ion transport regulator 4                               | 108017 | 2.48  | 3.22  | 0.59  | 4.16 | 0.27 ns   |
| Pax8          | paired box gene 8                                                             | 18510  | 2.39  | 2.24  | 1.82  | 1.31 | 0.73 ns   |
| Pfn2          | profilin 2                                                                    | 18645  | 1.21  | 1.28  | 0.98  | 1.23 | -0.14 ns  |
| Krt23         | keratin 23                                                                    | 94179  | 0.22  | 0.25  | 0.14  | 1.57 | -0.28 ns  |
| Nme7          | non-metastatic cells 7, protein expressed in                                  | 171567 | 1.08  | 0.97  | 0.69  | 1.57 | 0.54 ns   |
| 2610024G14Rik | RIKEN cDNA 2610024G14 gene                                                    | 56412  | 0.37  | 0.41  | 0.43  | 0.87 | -0.87 *   |
| Sec11a        | SEC11 homolog A (S. cerevisiae)                                               | 56529  | 2.74  | 2.70  | 3.03  | 0.90 | -0.27 ns  |
| Orc2l         | origin recognition complex, subunit 2-like (S. cerevisiae)                    | 18393  | 0.63  | 0.86  | 0.64  | 0.99 | -0.11 ns  |
| Nfu1          | NFU1 iron-sulfur cluster scaffold homolog (S. cerevisiae)                     | 56748  | 1.48  | 1.46  | 1.65  | 0.89 | -0.41 ns  |
| Lims1         | LIM and senescent cell antigen-like domains 1                                 | 110829 | 1.70  | 1.36  | 1.18  | 1.44 | 0.49 ns   |
| Trappc5       | trafficking protein particle complex 5                                        | 66682  | 0.61  | 0.63  | 0.80  | 0.76 | -0.10 ns  |
| Bcas2         | breast carcinoma amplified sequence 2                                         | 68183  | 1.69  | 2.01  | 1.81  | 0.93 | -0.32 ns  |
| Gbp2          | guanylate nucleotide binding protein 2                                        | 14469  | 0.02  | 0.06  | 0.54  | 0.04 | -0.62 ns  |
| Usf2          | upstream transcription factor 2                                               | 22282  | 0.54  | 0.49  | 0.62  | 0.86 | -0.57 ns  |
| Faf1          | Fas-associated factor 1                                                       | 14084  | 1.70  | 1.65  | 1.82  | 0.93 | -0.02 ns  |
| Nat5          | N-acetyltransferase 5 (ARD1 homolog, S. cerevisiae)                           | 67877  | 2.38  | 2.21  | 2.96  | 0.80 | -0.63 ns  |
| Rbm9          | RNA binding motif protein 9                                                   | 93686  | 0.68  | 0.63  | 0.77  | 0.88 | -0.53 ns  |
| Crcp          | calcitonin gene-related peptide-receptor component protein                    | 12909  | 0.37  | 0.47  | 0.46  | 0.82 | -0.62 ns  |
| Arl4d         | ADP-ribosylation factor-like 4D                                               | 80981  | 0.39  | 0.36  | 0.33  | 1.20 | 0.44 ns   |
| LOC638935     |                                                                               | 638935 | 0.38  | 0.52  | 0.38  | 0.98 | 0.14 ns   |
| Padi2         |                                                                               | 18600  | 0.38  | 0.52  | 0.38  | 0.98 | 0.14 ns   |
| Hspa4l        | heat shock protein 4 like                                                     | 18415  | 0.89  | 1.00  | 1.10  | 0.80 | -0.22 ns  |
| Apip          | APAF1 interacting protein                                                     | 56369  | 0.65  | 0.55  | 0.42  | 1.56 | 0.11 ns   |
| Srf           | serum response factor                                                         | 20807  | 0.63  | 0.73  | 0.46  | 1.38 | 0.45 ns   |
| Slc12a7       | solute carrier family 12, member 7                                            | 20499  | 0.71  | 0.94  | 1.12  | 0.63 | -0.98 *** |
| Dynll2        | dynein light chain LC8-type 2                                                 | 68097  | 2.20  | 2.12  | 2.05  | 1.07 | 0.51 ns   |
| Entpd2        | ectonucleoside triphosphate diphosphohydrolase 2                              | 12496  | 0.32  | 0.35  | 0.62  | 0.51 | -0.89 *   |
| Cenpk         | centromere protein K                                                          | 60411  | 1.30  | 1.71  | 2.46  | 0.53 | -0.57 ns  |
| Irf2          | interferon regulatory factor 2                                                | 16363  | 0.32  | 0.28  | 0.50  | 0.64 | -0.57 ns  |
| LOC666899     |                                                                               | 666899 | 18.67 | 18.01 | 17.99 | 1.03 | -0.15 ns  |
| Rpl30         |                                                                               | 19946  | 18.67 | 18.01 | 17.99 | 1.03 | -0.15 ns  |
| Eif2          | E74-like factor 2                                                             | 69257  | 1.30  | 1.12  | 1.20  | 1.08 | -0.18 ns  |
| rp9           | retinitis pigmentosa 9 (human)                                                | 55934  | 2.24  | 2.11  | 1.87  | 1.19 | 0.78 ns   |
| Rad51         | RAD51 homolog (S. cerevisiae)                                                 | 19361  | 1.89  | 1.60  | 1.80  | 1.04 | 0.48 ns   |
| Cldn4         | claudin 4                                                                     | 12740  | 6.76  | 4.57  | 3.19  | 2.11 | 0.81 ns   |
| Vps72         | vacuolar protein sorting 72 (yeast)                                           | 21427  | 2.00  | 2.14  | 1.64  | 1.21 | 0.60 ns   |
| Asna1         | arsA (bacterial) arsenite transporter, ATP-binding, homolog 1                 | 56495  | 2.62  | 2.35  | 2.65  | 0.98 | 0.41 ns   |
| Ifft2         | interferon-induced protein with tetratricopeptide repeats 2                   | 15958  | 1.36  | 1.03  | 1.14  | 1.19 | 0.47 ns   |
| Epb4.114b     | erythrocyte protein band 4.1-like 4b                                          | 54357  | 1.06  | 0.90  | 1.29  | 0.81 | -0.35 ns  |
| Dgat1         | diacylglycerol O-acyltransferase 1                                            | 13350  | 0.84  | 0.72  | 1.05  | 0.80 | -0.41 ns  |
| Fxyd5         | FXD domain-containing ion transport regulator 5                               | 18301  | 0.13  | 0.19  | 0.74  | 0.18 | -0.50 ns  |
| Mknk2         | MAP kinase-interacting serine/threonine kinase 2                              | 17347  | 5.26  | 4.39  | 4.14  | 1.26 | 0.58 ns   |
| Irf6          | interferon regulatory factor 6                                                | 54139  | 3.09  | 3.11  | 2.32  | 1.33 | 0.02 ns   |
| Ppt2          | palmitoyl-protein thioesterase 2                                              | 54397  | 0.59  | 0.82  | 0.67  | 0.88 | -0.40 ns  |
| Nola1         | nucleolar protein family A, member 1 (H/ACA small nucleolar RNPs)             | 68147  | 1.75  | 2.22  | 1.69  | 1.03 | 0.00 ns   |
| Hus1          | Hus1 homolog (S. pombe)                                                       | 15574  | 0.50  | 0.45  | 0.52  | 0.96 | -0.03 ns  |

|               |                                                                                |        |      |      |      |       |          |
|---------------|--------------------------------------------------------------------------------|--------|------|------|------|-------|----------|
| Mark3         | MAP/microtubule affinity-regulating kinase 3                                   | 17169  | 2.44 | 2.72 | 2.73 | 0.89  | -0.33 ns |
| Rnf128        | ring finger protein 128                                                        | 66889  | 2.41 | 2.65 | 3.02 | 0.79  | -0.85 *  |
| Prss8         | protease, serine, 8 (prostasin)                                                | 76560  | 1.00 | 0.89 | 0.76 | 1.32  | 0.57 ns  |
| Dci           | dodecenoyl-Coenzyme A delta isomerase (3,2 trans-enoyl-Coenzyme A isomerase)   | 13177  | 1.91 | 1.64 | 0.88 | 2.15  | 0.78 ns  |
| Fem1b         | feminization 1 homolog b (C. elegans)                                          | 14155  | 3.94 | 3.62 | 3.64 | 1.08  | 0.60 ns  |
| Slc7a5        | solute carrier family 7 (cationic amino acid transporter, y+ system), member 5 | 20539  | 1.15 | 1.57 | 0.82 | 1.40  | 0.47 ns  |
| 1110058L19Rik | RIKEN cDNA 1110058L19 gene                                                     | 68002  | 0.84 | 0.90 | 0.57 | 1.48  | 0.37 ns  |
| Ctcf          | CCCTC-binding factor                                                           | 13018  | 2.40 | 2.88 | 2.94 | 0.81  | -0.33 ns |
| 111003102Rik  | RIKEN cDNA 111003102 gene                                                      | 66179  | 0.54 | 0.58 | 0.77 | 0.69  | -0.17 ns |
| Agtbp1        |                                                                                | 67269  | 0.73 | 0.66 | 0.54 | 1.35  | 0.73 ns  |
| Dbf4          | DBF4 homolog (S. cerevisiae)                                                   | 27214  | 2.48 | 2.55 | 3.26 | 0.76  | -0.69 ns |
| Dph1          |                                                                                | 116905 | 0.48 | 0.56 | 0.37 | 1.30  | -0.06 ns |
| Rpia          | ribose 5-phosphate isomerase A                                                 | 19895  | 0.78 | 1.18 | 1.07 | 0.73  | -0.13 ns |
| Wdr33         | WD repeat domain 33                                                            | 74320  | 0.85 | 0.87 | 0.86 | 0.98  | 0.16 ns  |
| Recql         | RecQ protein-like                                                              | 19691  | 0.34 | 0.45 | 0.62 | 0.56  | -0.91 *  |
| Rfc1          | replication factor C (activator 1) 1                                           | 19687  | 2.02 | 2.19 | 1.91 | 1.05  | 0.50 ns  |
| Gtf2ird2      | GTF2I repeat domain containing 2                                               | 114674 | 0.43 | 0.40 | 0.48 | 0.88  | -0.27 ns |
| Ccdc22        | coiled-coil domain containing 22                                               | 54638  | 0.57 | 0.59 | 0.92 | 0.61  | -0.25 ns |
| Hbegf         | heparin-binding EGF-like growth factor                                         | 15200  | 1.48 | 1.37 | 1.05 | 1.41  | 0.75 ns  |
| Nucb2         | nucleobindin 2                                                                 | 53322  | 0.39 | 0.45 | 0.83 | 0.47  | -0.64 ns |
| Wbscr27       | Williams Beuren syndrome chromosome region 27 (human)                          | 79565  | 0.41 | 0.36 | 0.31 | 1.34  | 0.69 ns  |
| Ftl1          | ferritin light chain 1                                                         | 14325  | 8.88 | 7.34 | 8.21 | 1.08  | -0.01 ns |
| Ctsh          | cathepsin H                                                                    | 13036  | 2.33 | 2.52 | 3.10 | 0.75  | -0.28 ns |
| Adsl          | adenylosuccinate lyase 1                                                       | 11564  | 0.82 | 0.72 | 0.71 | 1.15  | -0.05 ns |
| Fxyd3         | FXYD domain-containing ion transport regulator 3                               | 17178  | 0.16 | 0.26 | 1.60 | 0.10  | -0.58 ns |
| Mbd6          | methyl-CpG binding domain protein 6                                            | 110962 | 0.57 | 0.54 | 0.45 | 1.26  | 0.05 ns  |
| Terr1         | telomeric repeat binding factor 1                                              | 21749  | 0.61 | 0.65 | 0.75 | 0.80  | -0.26 ns |
| Apool         | apolipoprotein O-like                                                          | 68117  | 0.32 | 0.26 | 0.39 | 0.81  | -0.44 ns |
| Phf21a        | PHD finger protein 21A                                                         | 192285 | 0.52 | 0.48 | 0.50 | 1.05  | -0.08 ns |
| Cd97          | CD97 antigen                                                                   | 26364  | 0.56 | 0.63 | 1.11 | 0.51  | -0.54 ns |
| Zfp275        | zinc finger protein 275                                                        | 27081  | 0.60 | 0.58 | 1.15 | 0.52  | -0.69 ns |
| Kctd9         | potassium channel tetramerization domain containing 9                          | 105440 | 0.54 | 0.57 | 0.68 | 0.78  | -0.30 ns |
| Dusp16        | dual specificity phosphatase 16                                                | 70686  | 1.37 | 1.66 | 2.16 | 0.63  | -0.52 ns |
| Rad9          | RAD9 homolog (S. pombe)                                                        | 19367  | 0.85 | 0.79 | 0.58 | 1.44  | 0.97 **  |
| Hgfac         | hepatocyte growth factor activator                                             | 54426  | 0.61 | 0.60 | 1.14 | 0.53  | -0.78 ns |
| Zfand1        | zinc finger, AN1-type domain 1                                                 | 66361  | 0.56 | 0.56 | 0.49 | 1.14  | -0.39 ns |
| Jrk           | jerky                                                                          | 16469  | 0.42 | 0.35 | 0.39 | 1.07  | 0.46 ns  |
| Tpd52l1       | tumor protein D52-like 1                                                       | 21987  | 0.86 | 0.32 | 0.08 | 10.62 | 0.43 ns  |
| Hoxb5         | homeo box B5                                                                   | 15413  | 1.32 | 0.78 | 0.65 | 2.04  | 0.31 ns  |
| Kif5b         | kinesin family member 5B                                                       | 16573  | 1.62 | 1.90 | 2.07 | 0.78  | -0.50 ns |
| Cab39         | calcium binding protein 39                                                     | 12283  | 1.74 | 1.66 | 1.54 | 1.12  | 0.11 ns  |
| Stx7          | syntaxin 7                                                                     | 53331  | 2.66 | 2.29 | 2.08 | 1.27  | 0.38 ns  |
| Mlx           | MAX-like protein X                                                             | 21428  | 0.45 | 0.39 | 0.47 | 0.95  | 0.26 ns  |
| D10Ert322e    | DNA segment, Chr 10, ERATO Doi 322, expressed                                  | 67270  | 2.50 | 2.36 | 2.45 | 1.02  | -0.30 ns |
| Xpo1          | exportin 1, CRM1 homolog (yeast)                                               | 103573 | 4.02 | 3.88 | 4.62 | 0.87  | -0.45 ns |
| Golga5        | golgi autoantigen, golgin subfamily a, 5                                       | 27277  | 1.63 | 1.59 | 1.77 | 0.92  | -0.37 ns |
| Rras          | Harvey rat sarcoma oncogene, subgroup R                                        | 20130  | 0.72 | 0.71 | 1.01 | 0.70  | -0.22 ns |
| Lad1          | ladinin                                                                        | 16763  | 6.25 | 5.34 | 4.90 | 1.27  | 0.89 *   |
| Anapc7        | anaphase promoting complex subunit 7                                           | 56317  | 1.36 | 1.46 | 1.48 | 0.92  | -0.18 ns |
| Exosc9        | exosome component 9                                                            | 50911  | 1.42 | 1.68 | 1.39 | 1.02  | -0.16 ns |
| Pik3r2        | phosphatidylinositol 3-kinase, regulatory subunit, polypeptide 2 (p85 beta)    | 18709  | 0.80 | 0.88 | 0.80 | 0.99  | 0.26 ns  |
| Anxa11        | annexin A11                                                                    | 11744  | 1.32 | 1.18 | 0.73 | 1.82  | 0.26 ns  |
| Scnn1b        | sodium channel, nonvoltage-gated 1 beta                                        | 20277  | 0.09 | 0.14 | 0.15 | 0.58  | -0.66 ns |
| Crlf1         | cytokine receptor-like factor 1                                                | 12931  | 1.04 | 0.79 | 1.00 | 1.03  | 0.38 ns  |
| Pkmyt1        | protein kinase, membrane associated tyrosine/threonine 1                       | 268930 | 1.31 | 1.23 | 0.98 | 1.32  | 0.75 ns  |
| Ggta1         | glycoprotein galactosyltransferase alpha 1, 3                                  | 14594  | 0.49 | 0.63 | 0.40 | 1.23  | -0.03 ns |
| Vnn1          | vanin 1                                                                        | 22361  | 0.45 | 0.28 | 0.47 | 0.95  | -0.43 ns |
| Ripk4         | receptor-interacting serine-threonine kinase 4                                 | 72388  | 3.23 | 3.66 | 3.59 | 0.89  | -0.71 ns |
| Pus3          | pseudouridine synthase 3                                                       | 67049  | 0.42 | 0.27 | 0.21 | 1.95  | 0.90 *   |
| Foxa1         | forkhead box A1                                                                | 15375  | 1.17 | 1.18 | 1.09 | 1.07  | -0.49 ns |
| Oxr1          | oxidation resistance 1                                                         | 170719 | 2.80 | 2.85 | 4.88 | 0.57  | -0.89 *  |
| Hspa9         | heat shock protein 9                                                           | 15526  | 3.00 | 3.68 | 3.70 | 0.81  | -0.35 ns |
| Nudt4         | nudix (nucleoside diphosphate linked moiety X)-type motif 4                    | 71207  | 1.67 | 1.37 | 1.01 | 1.64  | 0.28 ns  |
| Prdx2         | peroxiredoxin 2                                                                | 21672  | 5.38 | 5.29 | 5.38 | 0.99  | 0.14 ns  |
| Cbr2          | carbonyl reductase 2                                                           | 12409  | 0.32 | 0.40 | 0.38 | 0.82  | -0.64 ns |
| Fbxo8         | F-box protein 8                                                                | 50753  | 0.75 | 0.72 | 0.92 | 0.81  | -0.04 ns |
| Stk3          | serine/threonine kinase 3 (Ste20, yeast homolog)                               | 56274  | 1.26 | 1.11 | 1.70 | 0.74  | -0.63 ns |
| Mtf2          | metal response element binding transcription factor 2                          | 17765  | 1.48 | 1.41 | 1.44 | 1.02  | 0.14 ns  |
| Furin         | furin (paired basic amino acid cleaving enzyme)                                | 18550  | 0.59 | 0.49 | 0.53 | 1.10  | 0.48 ns  |
| Mtx1          | metaxin 1                                                                      | 17827  | 2.72 | 2.72 | 2.18 | 1.25  | 0.61 ns  |
| Pcm1          | pericentriolar material 1                                                      | 18536  | 0.95 | 1.17 | 1.00 | 0.94  | 0.29 ns  |
| Dad1          | defender against cell death 1                                                  | 13135  | 3.20 | 2.65 | 3.12 | 1.02  | 0.22 ns  |
| Osgp          | O-sialoglycoprotein endopeptidase                                              | 66246  | 0.90 | 0.77 | 0.68 | 1.32  | 0.07 ns  |
| Nup160        | nucleoporin 160                                                                | 59015  | 1.46 | 1.19 | 1.26 | 1.15  | 0.23 ns  |
| Fzd2          | frizzled homolog 2 (Drosophila)                                                | 57265  | 1.04 | 0.70 | 0.35 | 2.93  | 0.90 *   |
| Kdelr3        | KDEL (Lys-Asp-Glu-Leu) endoplasmic reticulum protein retention receptor 3      | 105785 | 0.63 | 0.79 | 0.67 | 0.94  | 0.42 ns  |
| Cenpo         | centromere protein O                                                           | 52504  | 0.37 | 0.36 | 0.41 | 0.91  | -0.44 ns |
| Ccdc43        | coiled-coil domain containing 43                                               | 52715  | 1.10 | 1.23 | 1.25 | 0.87  | 0.23 ns  |
| Wasf1         | WASP family 1                                                                  | 83767  | 0.36 | 0.38 | 0.25 | 1.45  | 0.66 ns  |
| Stambpl1      | Stam binding protein like 1                                                    | 76630  | 0.49 | 0.59 | 0.71 | 0.69  | -0.23 ns |
| Arhgef18      | rho/rac guanine nucleotide exchange factor (GEF) 18                            | 102098 | 1.08 | 1.00 | 1.15 | 0.94  | 0.04 ns  |
| Pdha1         | pyruvate dehydrogenase E1 alpha 1                                              | 18597  | 1.49 | 1.74 | 1.91 | 0.77  | 0.23 ns  |
| Nudcd2        | NudC domain containing 2                                                       | 52653  | 2.32 | 2.62 | 3.24 | 0.71  | -0.64 ns |
| Ncstn         | nicastin                                                                       | 59287  | 0.47 | 0.52 | 0.49 | 0.94  | -0.47 ns |

|               |                                                                                                              |        |       |       |       |        |          |
|---------------|--------------------------------------------------------------------------------------------------------------|--------|-------|-------|-------|--------|----------|
| Tnfrsf12a     | tumor necrosis factor receptor superfamily, member 12a                                                       | 27279  | 3.37  | 3.48  | 2.95  | 1.14   | 0.60 ns  |
| Raly          | hnRNP-associated with lethal yellow                                                                          | 19383  | 1.19  | 1.08  | 1.15  | 1.03   | -0.11 ns |
| Shfm1         | split hand/foot malformation (ectrodactyly) type 1                                                           | 20422  | 4.19  | 4.09  | 5.08  | 0.82   | -0.35 ns |
| Yipf5         | Yip1 domain family, member 5                                                                                 | 67180  | 1.07  | 1.14  | 1.06  | 1.00   | 0.45 ns  |
| Trim8         | tripartite motif protein 8                                                                                   | 93679  | 1.59  | 1.55  | 0.92  | 1.73   | 0.79 ns  |
| Dgka          | diacylglycerol kinase, alpha                                                                                 | 13139  | 0.71  | 0.70  | 0.72  | 0.99   | -0.46 ns |
| Rtp4          | receptor transporter protein 4                                                                               | 67775  | 0.06  | 0.16  | 2.64  | 0.02   | -0.69 ns |
| Hint3         | histidine triad nucleotide binding protein 3                                                                 | 66847  | 0.39  | 0.38  | 0.36  | 1.09   | -0.04 ns |
| Traf3         | Tnf receptor-associated factor 3                                                                             | 22031  | 0.85  | 0.84  | 0.88  | 0.96   | 0.06 ns  |
| Taf6          | TAF6 RNA polymerase II, TATA box binding protein (TBP)-associated factor                                     | 21343  | 0.89  | 0.87  | 0.93  | 0.95   | -0.29 ns |
| Ncoa1         | nuclear receptor coactivator 1                                                                               | 17977  | 0.64  | 0.77  | 0.96  | 0.67   | -0.79 ns |
| Hoxd10        | homeo box D10                                                                                                | 15430  | 0.38  | 0.38  | 0.22  | 1.68   | 0.03 ns  |
| Mafk          | v-maf musculoaponeurotic fibrosarcoma oncogene family, protein K (avian)                                     | 17135  | 0.41  | 0.50  | 0.52  | 0.79   | -0.53 ns |
| Ybx1          | Y box protein 1                                                                                              | 22608  | 7.30  | 6.92  | 7.86  | 0.92   | -0.48 ns |
| EG433184      |                                                                                                              | 433184 | 26.06 | 22.71 | 19.29 | 1.34   | 0.95 **  |
| EG666342      |                                                                                                              | 666342 | 26.06 | 22.71 | 19.29 | 1.34   | 0.95 **  |
| Gapdh         |                                                                                                              | 14433  | 26.06 | 22.71 | 19.29 | 1.34   | 0.95 **  |
| Gclm          | glutamate-cysteine ligase, modifier subunit                                                                  | 14630  | 1.14  | 1.32  | 0.84  | 1.36   | 0.51 ns  |
| Notch1        | Notch gene homolog 1 (Drosophila)                                                                            | 18128  | 1.91  | 1.88  | 1.22  | 1.56   | 0.86 *   |
| Etv3          | ets variant gene 3                                                                                           | 27049  | 0.47  | 0.58  | 0.73  | 0.65   | -0.94 ** |
| Sirt1         | sirtuin 1 ((silent mating type information regulation 2, homolog) 1 (S. cerevisiae))                         | 93759  | 0.79  | 0.76  | 0.61  | 1.28   | 0.16 ns  |
| Stk11         | serine/threonine kinase 11                                                                                   | 20869  | 1.34  | 1.08  | 1.04  | 1.28   | 0.66 ns  |
| Egln3         | EGL nine homolog 3 (C. elegans)                                                                              | 112407 | 1.93  | 2.18  | 5.03  | 0.38   | -0.55 ns |
| B4galnt1      | beta-1,4-N-acetyl-galactosaminyl transferase 1                                                               | 14421  | 0.74  | 0.80  | 0.75  | 0.97   | -0.34 ns |
| Lsm5          | LSM5 homolog, U6 small nuclear RNA associated (S. cerevisiae)                                                | 66373  | 1.66  | 1.86  | 2.44  | 0.68   | -0.61 ns |
| Clock         | circadian locomotor output cycles kaput                                                                      | 12753  | 0.47  | 0.60  | 0.62  | 0.75   | -0.34 ns |
| Mpdz          | multiple PDZ domain protein                                                                                  | 17475  | 0.64  | 0.59  | 0.56  | 1.13   | 0.53 ns  |
| Impa2         | inositol (myo)-1(or 4)-monophosphatase 2                                                                     | 114663 | 0.37  | 0.27  | 0.39  | 0.93   | -0.24 ns |
| 2410002O22Rik | RIKEN cDNA 2410002O22 gene                                                                                   | 66975  | 0.31  | 0.48  | 0.60  | 0.52   | -0.87 *  |
| Hspg2         | perlecan (heparan sulfate proteoglycan 2)                                                                    | 15530  | 0.65  | 0.76  | 0.56  | 1.16   | 0.18 ns  |
| Capn5         | calpain 5                                                                                                    | 12337  | 1.07  | 1.14  | 0.92  | 1.16   | 0.56 ns  |
| Rab8a         | RAB8A, member RAS oncogene family                                                                            | 17274  | 1.71  | 1.64  | 2.09  | 0.81   | -0.43 ns |
| Kcmf1         | potassium channel modulatory factor 1                                                                        | 74287  | 2.14  | 2.30  | 3.22  | 0.66   | -0.72 ns |
| Inmt          | indolethylamine N-methyltransferase                                                                          | 21743  | 1.09  | 0.59  | 0.09  | 11.82  | 0.68 ns  |
| Fech          | ferrochelatase                                                                                               | 14151  | 0.50  | 0.48  | 0.65  | 0.77   | -0.55 ns |
| 281042815Rik  | RIKEN cDNA 281042815 gene                                                                                    | 66462  | 0.90  | 0.92  | 0.88  | 1.01   | 0.17 ns  |
| S100a13       | S100 calcium binding protein A13                                                                             | 20196  | 0.62  | 0.80  | 0.51  | 1.21   | 0.48 ns  |
| Cd59a         | CD59a antigen                                                                                                | 12509  | 0.69  | 0.46  | 0.26  | 2.61   | 0.74 ns  |
| Cdc42ep5      | CDC42 effector protein (Rho GTPase binding) 5                                                                | 58804  | 1.05  | 0.92  | 0.77  | 1.36   | -0.05 ns |
| Pcbd1         | pterin 4 alpha carbinolamine dehydratase/dimerization cofactor of hepatocyte nuclear factor 1 alpha (TCF1) 1 | 13180  | 2.84  | 2.70  | 2.25  | 1.26   | 0.37 ns  |
| Pank1         | pantothenate kinase 1                                                                                        | 75735  | 0.36  | 0.61  | 0.44  | 0.83   | -0.39 ns |
| Cxcl16        | chemokine (C-X-C motif) ligand 16                                                                            | 66102  | 0.67  | 1.06  | 1.91  | 0.35   | -0.56 ns |
| 2410004L22Rik | RIKEN cDNA 2410004L22 gene                                                                                   | 76478  | 0.35  | 0.54  | 0.65  | 0.54   | -0.30 ns |
| Cops7b        | COP9 (constitutive photomorphogenic) homolog, subunit 7b (Arabidopsis thaliana)                              | 26895  | 0.63  | 0.60  | 0.44  | 1.43   | 0.72 ns  |
| Tnnt2         | troponin T2, cardiac                                                                                         | 21956  | 0.14  | 0.20  | 0.43  | 0.33   | -0.55 ns |
| Nudt2         | nudix (nucleoside diphosphate linked moiety X)-type motif 2                                                  | 66401  | 0.72  | 0.67  | 0.79  | 0.90   | -0.27 ns |
| Psd3          | pleckstrin and Sec7 domain containing 3                                                                      | 234353 | 0.54  | 0.52  | 0.44  | 1.21   | 0.68 ns  |
| Rdh11         | retinol dehydrogenase 11                                                                                     | 17252  | 0.89  | 0.98  | 1.55  | 0.57   | -0.54 ns |
| Nit2          | nitrilase family, member 2                                                                                   | 52633  | 0.41  | 0.43  | 0.67  | 0.61   | -0.81 *  |
| BC016423      | cDNA sequence BC016423                                                                                       | 105203 | 1.06  | 1.10  | 1.17  | 0.90   | -0.73 ns |
| Fads3         | fatty acid desaturase 3                                                                                      | 60527  | 0.69  | 0.45  | 0.24  | 2.90   | 0.86 *   |
| AI837181      | expressed sequence AI837181                                                                                  | 107242 | 0.81  | 0.66  | 0.39  | 2.04   | 0.86 *   |
| Rce1          | RCE1 homolog, prenyl protein peptidase (S. cerevisiae)                                                       | 19671  | 0.92  | 0.85  | 0.66  | 1.39   | 0.90 *   |
| Cyp39a1       | cytochrome P450, family 39, subfamily a, polypeptide 1                                                       | 56050  | 0.89  | 0.76  | 0.60  | 1.48   | 0.82 *   |
| Grik5         | glutamate receptor, ionotropic, kainate 5 (gamma 2)                                                          | 14809  | 0.36  | 0.31  | 0.34  | 1.06   | 0.34 ns  |
| Sh3gl2        | SH3-domain GRB2-like 2                                                                                       | 20404  | 0.63  | 0.34  | 0.06  | 10.17  | 0.98 *** |
| Zkscan1       | zinc finger with KRAB and SCAN domains 1                                                                     | 74570  | 1.09  | 1.06  | 0.93  | 1.17   | 0.65 ns  |
| Cdh2          | cadherin 2                                                                                                   | 12558  | 0.45  | 0.23  | 0.00  | 163.84 | 0.61 ns  |
| Chmp1b        | chromatin modifying protein 1B                                                                               | 67064  | 0.78  | 0.87  | 1.12  | 0.69   | -0.69 ns |
| Aqp5          | aquaporin 5                                                                                                  | 11830  | 0.15  | 0.19  | 0.17  | 0.89   | -0.50 ns |
| Zcchc10       | zinc finger, CCHC domain containing 10                                                                       | 67966  | 0.32  | 0.36  | 0.45  | 0.70   | -0.91 *  |
| Arf6          | ADP-ribosylation factor 6                                                                                    | 11845  | 8.76  | 9.19  | 9.46  | 0.92   | -0.62 ns |
| Thex1         | three prime histone mRNA exonuclease 1                                                                       | 67276  | 1.00  | 1.21  | 1.59  | 0.63   | -0.39 ns |
| Eno2          | enolase 2, gamma neuronal                                                                                    | 13807  | 0.32  | 0.30  | 0.58  | 0.56   | -0.60 ns |
| Pkp3          | plakophilin 3                                                                                                | 56460  | 0.78  | 0.78  | 0.92  | 0.85   | -0.43 ns |
| Phlda1        | pleckstrin homology-like domain, family A, member 1                                                          | 21664  | 3.06  | 3.37  | 2.81  | 1.09   | -0.12 ns |
| Abcd1         | ATP-binding cassette, sub-family D (ALD), member 1                                                           | 11666  | 0.48  | 0.34  | 0.29  | 1.64   | 0.86 *   |
| Pdcd4         |                                                                                                              | 18569  | 2.90  | 2.66  | 1.15  | 2.52   | 0.67 ns  |
| Cdc211        | cell division cycle 2-like 1                                                                                 | 12537  | 1.29  | 1.28  | 1.41  | 0.91   | -0.07 ns |
| Slc30a4       | solute carrier family 30 (zinc transporter), member 4                                                        | 22785  | 1.45  | 1.26  | 1.71  | 0.84   | -0.12 ns |
| Alg9          | asparagine-linked glycosylation 9 homolog (yeast, alpha 1,2 mannosyltransferase)                             | 102580 | 0.62  | 0.50  | 0.62  | 1.00   | 0.45 ns  |
| Ap4m1         | adaptor-related protein complex AP-4, mu 1                                                                   | 11781  | 0.37  | 0.26  | 0.33  | 1.11   | -0.46 ns |
| Epc1          | enhancer of polycomb homolog 1 (Drosophila)                                                                  | 13831  | 1.09  | 1.29  | 1.41  | 0.77   | -0.29 ns |
| Trim39        | tripartite motif protein 39                                                                                  | 79263  | 0.48  | 0.38  | 0.32  | 1.48   | 0.65 ns  |
| Birc2         | baculoviral IAP repeat-containing 2                                                                          | 11797  | 0.73  | 0.63  | 0.31  | 2.34   | 0.95 **  |
| Fanca         | Fanconi anemia, complementation group A                                                                      | 14087  | 1.11  | 1.04  | 0.70  | 1.57   | 0.53 ns  |
| Rfxap         | regulatory factor X-associated protein                                                                       | 170767 | 0.40  | 0.45  | 0.58  | 0.69   | -0.17 ns |
| Pias4         | protein inhibitor of activated STAT 4                                                                        | 59004  | 0.59  | 0.52  | 0.49  | 1.18   | -0.04 ns |
| Pus1          | pseudouridine synthase 1                                                                                     | 56361  | 0.71  | 0.54  | 0.50  | 1.41   | 0.77 ns  |
| Abcb1b        | ATP-binding cassette, sub-family B (MDR/TAP), member 1B                                                      | 18669  | 0.14  | 0.14  | 0.37  | 0.38   | -0.72 ns |
| Psmc4         | proteasome (prosome, macropain) 26S subunit, non-ATPase, 4                                                   | 19185  | 3.27  | 3.55  | 3.28  | 0.99   | 0.45 ns  |



|               |                                                                                |        |       |       |       |       |          |
|---------------|--------------------------------------------------------------------------------|--------|-------|-------|-------|-------|----------|
| Pabpc1        | poly A binding protein, cytoplasmic 1                                          | 18458  | 18.40 | 18.58 | 18.99 | 0.96  | -0.61 ns |
| Tuba1a        | tubulin, alpha 1A                                                              | 22142  | 9.31  | 10.01 | 11.58 | 0.80  | -0.42 ns |
| ldh3b         | isocitrate dehydrogenase 3 (NAD+) beta                                         | 170718 | 3.38  | 3.11  | 2.83  | 1.19  | 0.25 ns  |
| Sepr1         | selenoprotein X 1                                                              | 27361  | 1.41  | 1.27  | 0.98  | 1.42  | 0.94 **  |
| Rab3d         | RAB3D, member RAS oncogene family                                              | 19340  | 0.71  | 0.66  | 0.63  | 1.12  | 0.67 ns  |
| Pbx2          | pre B-cell leukemia transcription factor 2                                     | 18515  | 0.99  | 0.96  | 0.68  | 1.46  | 0.70 ns  |
| Skap2         | src family associated phosphoprotein 2                                         | 54353  | 1.58  | 1.68  | 1.87  | 0.84  | -0.61 ns |
| Rpn2          | ribophorin II                                                                  | 20014  | 2.91  | 3.11  | 4.02  | 0.72  | -0.52 ns |
| Ufm1          | ubiquitin-fold modifier 1                                                      | 67890  | 1.37  | 1.18  | 1.21  | 1.12  | -0.05 ns |
| Cebpb         | CCAAT/enhancer binding protein (C/EBP), beta                                   | 12608  | 3.28  | 3.33  | 4.43  | 0.74  | -0.91 *  |
| Aqp2          | aquaporin 2                                                                    | 11827  | 5.03  | 2.92  | 0.12  | 41.30 | 1.00     |
| Nubp1         | nucleotide binding protein 1                                                   | 26425  | 1.39  | 1.28  | 1.70  | 0.81  | -0.78 ns |
| Bmp7          | bone morphogenetic protein 7                                                   | 12162  | 0.62  | 0.88  | 0.41  | 1.49  | 0.16 ns  |
| Sgol1         | shugoshin-like 1 (S. pombe)                                                    | 72415  | 1.04  | 1.23  | 0.98  | 1.05  | 0.58 ns  |
| Rassf7        | Ras association (RalGDS/AF-6) domain family 7                                  | 66985  | 1.72  | 1.73  | 1.82  | 0.94  | -0.40 ns |
| Celsr1        | cadherin EGF LAG seven-pass G-type receptor 1                                  | 12614  | 1.39  | 1.23  | 1.25  | 1.10  | 0.06 ns  |
| lft57         | intraflagellar transport 57 homolog (Chlamydomonas)                            | 73916  | 0.78  | 0.86  | 1.03  | 0.76  | -0.74 ns |
| Nfil3         | nuclear factor, interleukin 3, regulated                                       | 18030  | 0.26  | 0.29  | 0.59  | 0.44  | -0.93 ** |
| Maff          | v-maf musculoaponeurotic fibrosarcoma oncogene family, protein F (avian)       | 17133  | 0.46  | 0.53  | 0.95  | 0.48  | -0.64 ns |
| lft74         | intraflagellar transport 74 homolog (Chlamydomonas)                            | 67694  | 0.73  | 0.81  | 0.75  | 0.97  | -0.57 ns |
| B230120H23Rik | RIKEN cDNA B230120H23 gene                                                     | 65964  | 0.44  | 0.45  | 0.41  | 1.07  | -0.19 ns |
| St3gal1       | ST3 beta-galactoside alpha-2,3-sialyltransferase 1                             | 20442  | 0.08  | 0.13  | 0.43  | 0.19  | -0.61 ns |
| Nek3          | NIMA (never in mitosis gene a)-related expressed kinase 3                      | 23954  | 0.41  | 0.31  | 0.34  | 1.18  | 0.63 ns  |
| Gdf15         | growth differentiation factor 15                                               | 23886  | 1.80  | 2.25  | 3.13  | 0.57  | -0.14 ns |
| Necap2        | NECAP endocytosis associated 2                                                 | 66147  | 0.78  | 0.88  | 1.01  | 0.77  | -0.78 ns |
| 2310047O13Rik | RIKEN cDNA 2310047O13 gene                                                     | 66960  | 0.63  | 0.45  | 0.50  | 1.23  | 0.50 ns  |
| Nosip         | nitric oxide synthase interacting protein                                      | 66394  | 0.48  | 0.49  | 0.53  | 0.90  | -0.23 ns |
| St7           | Suppression of tumorigenicity 7                                                | 64213  | 0.38  | 0.43  | 0.36  | 1.07  | 0.26 ns  |
| Rb1cc1        | RB1-inducible coiled-coil 1                                                    | 12421  | 0.75  | 0.73  | 0.47  | 1.59  | 0.61 ns  |
| Skp2          | S-phase kinase-associated protein 2 (p45)                                      | 27401  | 0.77  | 0.82  | 1.26  | 0.61  | -0.63 ns |
| Bcl10         | B-cell leukemia/lymphoma 10                                                    | 12042  | 1.62  | 1.72  | 1.46  | 1.10  | 0.14 ns  |
| Blzf1         | basic leucine zipper nuclear factor 1                                          | 66352  | 0.51  | 0.44  | 0.35  | 1.47  | 0.84 *   |
| Inadl         | InaD-like (Drosophila)                                                         | 12695  | 0.81  | 0.71  | 0.63  | 1.29  | 0.38 ns  |
| Uxt           | ubiquitously expressed transcript                                              | 22294  | 0.37  | 0.38  | 0.74  | 0.50  | -0.56 ns |
| Pex7          | peroxisome biogenesis factor 7                                                 | 18634  | 0.86  | 0.67  | 0.77  | 1.11  | -0.04 ns |
| Bak1          | BCL2-antagonist/killer 1                                                       | 12018  | 0.41  | 0.48  | 0.34  | 1.19  | 0.58 ns  |
| Lym5          | LYR motif containing 5                                                         | 67636  | 0.73  | 0.90  | 0.69  | 1.05  | -0.35 ns |
| 2310033P09Rik | RIKEN cDNA 2310033P09 gene                                                     | 67862  | 0.57  | 0.55  | 0.74  | 0.76  | -0.55 ns |
| Gpatch1       | G patch domain containing 1                                                    | 67471  | 0.28  | 0.33  | 0.43  | 0.65  | -0.94 ** |
| EG433182      |                                                                                | 433182 | 20.57 | 17.58 | 18.50 | 1.11  | 0.70 ns  |
| Eno1          |                                                                                | 13806  | 20.57 | 17.58 | 18.50 | 1.11  | 0.70 ns  |
| Daxx          | Fas death domain-associated protein                                            | 13163  | 0.79  | 0.69  | 0.60  | 1.31  | 0.85 *   |
| Gltp          | glycolipid transfer protein                                                    | 56356  | 4.17  | 3.69  | 5.00  | 0.83  | -0.55 ns |
| Fads2         | fatty acid desaturase 2                                                        | 56473  | 3.66  | 3.11  | 2.55  | 1.43  | 0.56 ns  |
| Csnk2a1       | casein kinase 2, alpha 1 polypeptide                                           | 12995  | 1.12  | 1.28  | 1.10  | 1.01  | 0.30 ns  |
| lftg1         | integrin alpha FG-GAP repeat containing 1                                      | 71927  | 1.48  | 1.35  | 1.65  | 0.89  | -0.23 ns |
| Slc25a23      | solute carrier family 25 (mitochondrial carrier; phosphate carrier), member 23 | 66972  | 0.42  | 0.33  | 0.17  | 2.44  | 0.72 ns  |
| Pcnx          | pecanex homolog (Drosophila)                                                   | 54604  | 0.59  | 0.48  | 0.79  | 0.74  | -0.76 ns |
| Ovol1         | OVO homolog-like 1 (Drosophila)                                                | 18426  | 0.44  | 0.38  | 0.51  | 0.86  | -0.45 ns |
| Pex14         | peroxisomal biogenesis factor 14                                               | 56273  | 0.35  | 0.37  | 0.51  | 0.69  | -0.65 ns |
| Ptpn21        | protein tyrosine phosphatase, non-receptor type 21                             | 24000  | 0.57  | 0.56  | 0.59  | 0.95  | 0.35 ns  |
| Rhod          | ras homolog gene family, member D                                              | 11854  | 0.78  | 0.60  | 0.41  | 1.92  | 0.89 *   |
| Epb4.113      | erythrocyte protein band 4.1-like 3                                            | 13823  | 1.87  | 0.78  | 0.03  | 65.05 | 0.84 *   |
| Ugt8a         | UDP galactosyltransferase 8A                                                   | 22239  | 2.04  | 1.43  | 1.21  | 1.69  | 0.08 ns  |
| Ier5l         | immediate early response 5-like                                                | 72500  | 0.76  | 0.77  | 0.52  | 1.45  | 0.24 ns  |
| Rabgef1       | RAB guanine nucleotide exchange factor (GEF) 1                                 | 56715  | 1.15  | 1.27  | 1.20  | 0.96  | -0.59 ns |
| Chac2         | ChaC, cation transport regulator homolog 2 (E. coli)                           | 68044  | 0.43  | 0.56  | 0.68  | 0.63  | -0.69 ns |
| Brca2         | breast cancer 2                                                                | 12190  | 0.80  | 0.99  | 1.19  | 0.67  | -0.37 ns |
| Scnn1g        | sodium channel, nonvoltage-gated 1 gamma                                       | 20278  | 0.63  | 0.29  | 0.08  | 7.68  | 0.05 ns  |
| Fgfbp1        | fibroblast growth factor binding protein 1                                     | 14181  | 1.29  | 0.83  | 0.93  | 1.39  | 0.75 ns  |
| Anxa2         | annexin A2                                                                     | 12306  | 10.43 | 8.58  | 7.96  | 1.30  | 0.89 *   |
| Abhd6         | abhydrolase domain containing 6                                                | 66082  | 0.47  | 0.62  | 0.78  | 0.60  | -0.51 ns |
| Ing2          | inhibitor of growth family, member 2                                           | 69260  | 0.91  | 1.02  | 1.02  | 0.89  | 0.08 ns  |
| Ap1g2         | adaptor protein complex AP-1, gamma 2 subunit                                  | 11766  | 0.78  | 0.74  | 0.77  | 1.01  | -0.38 ns |
| Alg14         | asparagine-linked glycosylation 14 homolog (yeast)                             | 66789  | 0.57  | 0.72  | 0.54  | 1.04  | 0.39 ns  |
| Pdgfc         | platelet-derived growth factor, C polypeptide                                  | 54635  | 0.39  | 0.28  | 0.23  | 1.70  | 0.07 ns  |
| Hoxd9         | homeo box D9                                                                   | 15438  | 3.44  | 3.06  | 1.65  | 2.07  | 0.64 ns  |
| Evpl          | envoplakin                                                                     | 14027  | 0.49  | 0.46  | 0.51  | 0.96  | 0.05 ns  |
| Serpine1      | serine (or cysteine) peptidase inhibitor, clade E, member 1                    | 18787  | 0.29  | 0.19  | 0.59  | 0.48  | -0.45 ns |
| 2810417H13Rik | RIKEN cDNA 2810417H13 gene                                                     | 68026  | 10.31 | 9.49  | 9.21  | 1.11  | 0.71 ns  |
| Tmprss2       | transmembrane protease, serine 2                                               | 50528  | 3.68  | 3.75  | 2.99  | 1.22  | -0.27 ns |
| Sox4          |                                                                                | 20677  | 1.78  | 1.95  | 1.53  | 1.16  | 0.74 ns  |
| Hars2         | histidyl-tRNA synthetase 2, mitochondrial (putative)                           | 70791  | 0.34  | 0.30  | 0.33  | 1.02  | 0.28 ns  |
| Zfp260        |                                                                                | 26466  | 1.04  | 1.09  | 1.22  | 0.84  | -0.42 ns |
| Mapk6         | mitogen-activated protein kinase 6                                             | 50772  | 2.11  | 1.77  | 1.98  | 1.06  | 0.53 ns  |
| Dhfr          | dihydrofolate reductase                                                        | 13361  | 0.80  | 1.43  | 1.30  | 0.61  | -0.73 ns |
| 2410004B18Rik | RIKEN cDNA 2410004B18 gene                                                     | 66421  | 1.72  | 1.88  | 1.48  | 1.15  | -0.05 ns |
| Vps37a        | vacuolar protein sorting 37A (yeast)                                           | 52348  | 0.65  | 0.75  | 0.81  | 0.81  | -0.18 ns |
| Zfp326        | zinc finger protein 326                                                        | 54367  | 0.80  | 1.22  | 1.05  | 0.76  | -0.55 ns |
| Papd4         | PAP associated domain containing 4                                             | 100715 | 0.76  | 0.99  | 1.25  | 0.61  | -0.79 ns |
| Fhl2          | four and a half LIM domains 2                                                  | 14200  | 0.64  | 0.63  | 0.76  | 0.83  | -0.37 ns |
| Wfdc15b       | WAP four-disulfide core domain 15B                                             | 192201 | 0.24  | 0.36  | 0.07  | 3.51  | -0.28 ns |
| Dll1          | delta-like 1 (Drosophila)                                                      | 13388  | 0.41  | 0.30  | 0.23  | 1.76  | 0.38 ns  |
| 4933424B01Rik | RIKEN cDNA 4933424B01 gene                                                     | 71177  | 0.51  | 0.64  | 0.62  | 0.82  | -0.59 ns |
| Icosl         | icos ligand                                                                    | 50723  | 0.51  | 0.49  | 0.44  | 1.15  | -0.02 ns |

|               |                                                                                                   |        |       |       |       |      |          |
|---------------|---------------------------------------------------------------------------------------------------|--------|-------|-------|-------|------|----------|
| Nat6          | N-acetyltransferase 6                                                                             | 56441  | 0.37  | 0.34  | 0.36  | 1.03 | 0.56 ns  |
| Helb          | helicase (DNA) B                                                                                  | 117599 | 0.50  | 0.46  | 0.36  | 1.39 | 0.59 ns  |
| Abca7         | ATP-binding cassette, sub-family A (ABC1), member 7                                               | 27403  | 0.47  | 0.47  | 0.46  | 1.01 | -0.32 ns |
| Rab14         | RAB14, member RAS oncogene family                                                                 | 68365  | 7.11  | 6.75  | 4.73  | 1.50 | 0.89 *   |
| Pftk1         | PFTAIRE protein kinase 1                                                                          | 18647  | 0.41  | 0.67  | 0.77  | 0.53 | -0.78 ns |
| Eps15         | epidermal growth factor receptor pathway substrate 15                                             | 13858  | 0.29  | 0.31  | 0.37  | 0.79 | -0.64 ns |
| Eps15         | epidermal growth factor receptor pathway substrate 15                                             | 13858  | 2.09  | 1.92  | 2.00  | 1.04 | 0.49 ns  |
| Mthfd2        | methylenetetrahydrofolate dehydrogenase (NAD+ dependent), methenyltetrahydrofolate cyclohydrolase | 17768  | 1.48  | 1.83  | 1.71  | 0.86 | -0.49 ns |
| Tcea1         | transcription elongation factor A (SII) 1                                                         | 21399  | 3.21  | 2.98  | 2.29  | 1.39 | 0.64 ns  |
| Rsu1          | Ras suppressor protein 1                                                                          | 20163  | 1.65  | 1.36  | 0.71  | 2.32 | 0.70 ns  |
| Acad8         | acyl-Coenzyme A dehydrogenase family, member 8                                                    | 66948  | 0.43  | 0.34  | 0.32  | 1.33 | 0.75 ns  |
| Adrm1         | adhesion regulating molecule 1                                                                    | 56436  | 1.15  | 1.37  | 1.25  | 0.92 | -0.50 ns |
| 1200014M14Rik | RIKEN cDNA 1200014M14 gene                                                                        | 67463  | 0.20  | 0.27  | 0.37  | 0.54 | -0.74 ns |
| Nfyb          | nuclear transcription factor-Y beta                                                               | 18045  | 0.70  | 0.71  | 0.78  | 0.90 | -0.51 ns |
| Dut           | deoxyuridine triphosphatase                                                                       | 110074 | 2.37  | 1.74  | 1.95  | 1.21 | 0.66 ns  |
| Myd88         | myeloid differentiation primary response gene 88                                                  | 17874  | 0.30  | 0.39  | 0.40  | 0.75 | -0.20 ns |
| C80913        | expressed sequence C80913                                                                         | 19777  | 1.62  | 1.68  | 1.49  | 1.08 | -0.04 ns |
| Dazap1        | DAZ associated protein 1                                                                          | 70248  | 2.21  | 1.89  | 2.50  | 0.88 | -0.48 ns |
| Usp48         | ubiquitin specific peptidase 48                                                                   | 170707 | 0.65  | 0.60  | 0.82  | 0.79 | -0.26 ns |
| Zfp259        | zinc finger protein 259                                                                           | 22687  | 0.85  | 0.82  | 0.89  | 0.95 | 0.40 ns  |
| Ift81         | intraflagellar transport 81 homolog (Chlamydomonas)                                               | 12589  | 0.92  | 0.80  | 0.83  | 1.10 | -0.14 ns |
| Syngn1        | synaptogyrin 1                                                                                    | 20972  | 0.37  | 0.36  | 0.63  | 0.59 | -0.42 ns |
| Mettl6        | methyltransferase like 6                                                                          | 67011  | 0.26  | 0.40  | 0.31  | 0.82 | -0.37 ns |
| 1700011H14Rik | RIKEN cDNA 1700011H14 gene                                                                        | 67082  | 0.37  | 0.32  | 0.08  | 4.71 | 0.65 ns  |
| 2010012O05Rik | RIKEN cDNA 2010012O05 gene                                                                        | 66439  | 0.45  | 0.41  | 0.25  | 1.79 | 0.86 *   |
| Fzd4          | frizzled homolog 4 (Drosophila)                                                                   | 14366  | 0.31  | 0.40  | 0.17  | 1.77 | 0.15 ns  |
| Fbxo36        | F-box protein 36                                                                                  | 66153  | 0.86  | 0.67  | 0.43  | 1.97 | 0.56 ns  |
| Gnb1l         | guanine nucleotide binding protein (G protein), beta polypeptide 1-like                           | 13972  | 0.55  | 0.50  | 0.46  | 1.19 | 0.05 ns  |
| Pdxdc1        | pyridoxal-dependent decarboxylase domain containing 1                                             | 94184  | 1.86  | 2.08  | 2.09  | 0.88 | -0.16 ns |
| Sorbs3        | sorbin and SH3 domain containing 3                                                                | 20410  | 0.80  | 0.73  | 0.67  | 1.18 | -0.07 ns |
| Hook2         | hook homolog 2 (Drosophila)                                                                       | 170833 | 0.59  | 0.71  | 0.69  | 0.85 | -0.75 ns |
| I7Rn6         | lethal, Chr 7, Rinchik 6                                                                          | 67669  | 0.99  | 1.08  | 1.90  | 0.52 | -0.64 ns |
| Isy1          | ISY1 splicing factor homolog (S. cerevisiae)                                                      | 57905  | 0.37  | 0.35  | 0.32  | 1.16 | 0.83 *   |
| Ss18          | synovial sarcoma translocation, Chromosome 18                                                     | 268996 | 2.18  | 2.31  | 2.19  | 0.99 | 0.41 ns  |
| Mrpl35        | mitochondrial ribosomal protein L35                                                               | 66223  | 2.19  | 2.39  | 1.91  | 1.14 | -0.11 ns |
| EG624124      |                                                                                                   | 624124 | 24.53 | 23.55 | 20.46 | 1.19 | 0.79 ns  |
| LOC634044     |                                                                                                   | 634044 | 24.53 | 23.55 | 20.46 | 1.19 | 0.79 ns  |
| LOC670565     |                                                                                                   | 670565 | 24.53 | 23.55 | 20.46 | 1.19 | 0.79 ns  |
| Gosr2         | golgi SNAP receptor complex member 2                                                              | 56494  | 1.31  | 1.33  | 1.32  | 0.99 | 0.44 ns  |
| Atp6v1b1      | ATPase, H+ transporting, lysosomal V1 subunit B1                                                  | 110935 | 0.50  | 0.53  | 0.72  | 0.69 | -0.20 ns |
| Wbp4          | WW domain binding protein 4                                                                       | 22380  | 0.84  | 0.80  | 1.08  | 0.77 | -0.50 ns |
| Fxyd2         | FXYD domain-containing ion transport regulator 2                                                  | 11936  | 1.46  | 0.85  | 0.85  | 1.71 | -0.20 ns |
| Pick1         | protein interacting with C kinase 1                                                               | 18693  | 0.56  | 0.58  | 0.68  | 0.82 | -0.69 ns |
| Pola1         | polymerase (DNA directed), alpha 1                                                                | 18968  | 1.17  | 1.19  | 1.95  | 0.60 | -0.64 ns |
| Reep5         | receptor accessory protein 5                                                                      | 13476  | 2.22  | 1.81  | 2.27  | 0.97 | 0.33 ns  |
| Siah1b        |                                                                                                   | 20438  | 0.23  | 0.30  | 0.49  | 0.47 | -0.87 *  |
| Rarg          | retinoic acid receptor, gamma                                                                     | 19411  | 0.73  | 0.84  | 0.84  | 0.87 | -0.22 ns |
| Tbc1d1        | TBC1 domain family, member 1                                                                      | 57915  | 0.77  | 0.69  | 0.62  | 1.23 | 0.81 *   |
| Fzr1          | fizzy/cell division cycle 20 related 1 (Drosophila)                                               | 56371  | 0.70  | 0.78  | 0.75  | 0.93 | -0.17 ns |
| Uchl5         | ubiquitin carboxyl-terminal esterase L5                                                           | 56207  | 1.58  | 1.56  | 1.55  | 1.01 | 0.04 ns  |
| Il10rb        | interleukin 10 receptor, beta                                                                     | 16155  | 1.30  | 1.11  | 1.34  | 0.96 | -0.56 ns |
| Dcxr          | dicarbonyl L-xylulose reductase                                                                   | 67880  | 0.33  | 0.35  | 0.45  | 0.73 | -0.53 ns |
| Rgnef         | Rho-guanine nucleotide exchange factor                                                            | 110596 | 0.74  | 0.71  | 0.82  | 0.90 | -0.64 ns |
| Rpp14         | ribonuclease P 14 subunit (human)                                                                 | 67053  | 0.82  | 0.82  | 0.75  | 1.08 | -0.01 ns |
| Gtl3          | gene trap locus 3                                                                                 | 14894  | 1.33  | 1.35  | 1.20  | 1.10 | 0.81 ns  |
| Nudc          |                                                                                                   | 18221  | 2.54  | 2.75  | 3.32  | 0.76 | -0.57 ns |
| Gbas          | glioblastoma amplified sequence                                                                   | 14467  | 1.12  | 0.96  | 0.86  | 1.29 | 0.86 *   |
| Foxc1         | forkhead box C1                                                                                   | 17300  | 0.54  | 0.45  | 0.44  | 1.21 | -0.35 ns |
| Tpd52         | tumor protein D52                                                                                 | 21985  | 4.99  | 5.43  | 5.90  | 0.84 | -0.72 ns |
| Gpam          | glycerol-3-phosphate acyltransferase, mitochondrial                                               | 14732  | 1.02  | 1.26  | 0.89  | 1.14 | 0.35 ns  |
| Ggps1         | geranylgeranyl diphosphate synthase 1                                                             | 14593  | 0.75  | 0.84  | 0.84  | 0.89 | -0.42 ns |
| Nagk          | N-acetylglucosamine kinase                                                                        | 56174  | 0.86  | 1.14  | 1.19  | 0.71 | -0.81 *  |
| Prpf40b       | PRP40 pre-mRNA processing factor 40 homolog B (yeast)                                             | 54614  | 0.39  | 0.36  | 0.38  | 1.02 | 0.03 ns  |
| Ect2          | ect2 oncogene                                                                                     | 13605  | 2.62  | 3.03  | 3.24  | 0.80 | -0.83 *  |
| D0HXS9928E    | DNA segment, human DXS9928E                                                                       | 108160 | 0.75  | 0.83  | 1.40  | 0.53 | -0.59 ns |
| Zmynd19       | zinc finger, MYND domain containing 19                                                            | 67187  | 0.68  | 0.68  | 0.59  | 1.15 | 0.11 ns  |
| Rela          | v-rel reticuloendotheliosis viral oncogene homolog A (avian)                                      | 19697  | 4.44  | 4.11  | 2.79  | 1.58 | 0.97 **  |
| Atp6v1c1      | ATPase, H+ transporting, lysosomal V1 subunit C1                                                  | 66335  | 4.06  | 4.05  | 5.72  | 0.71 | -0.23 ns |
| Echdc1        | enoyl Coenzyme A hydratase domain containing 1                                                    | 52665  | 0.80  | 0.66  | 0.64  | 1.24 | 0.07 ns  |
| Rabggta       | RAB geranylgeranyl transferase, b subunit                                                         | 19352  | 2.40  | 1.80  | 1.37  | 1.75 | 0.77 ns  |
| Tmem9         | transmembrane protein 9                                                                           | 66241  | 0.61  | 0.54  | 0.43  | 1.42 | 0.83 *   |
| Birc6         | baculoviral IAP repeat-containing 6                                                               | 12211  | 2.12  | 2.43  | 1.62  | 1.30 | 0.48 ns  |
| Isg20         | interferon-stimulated protein                                                                     | 57444  | 0.38  | 0.37  | 0.91  | 0.42 | -0.56 ns |
| Cbx4          | chromobox homolog 4 (Drosophila Pc class)                                                         | 12418  | 1.81  | 1.83  | 1.96  | 0.92 | -0.73 ns |
| Spag1         | sperm associated antigen 1                                                                        | 26942  | 0.36  | 0.35  | 0.19  | 1.89 | 0.33 ns  |
| Krt80         | keratin 80                                                                                        | 74127  | 0.40  | 0.49  | 0.56  | 0.71 | -0.88 *  |
| 4833420G17Rik | RIKEN cDNA 4833420G17 gene                                                                        | 67392  | 1.02  | 1.44  | 1.38  | 0.74 | -0.69 ns |
| Efnb2         | ephrin B2                                                                                         | 13642  | 2.50  | 2.98  | 1.82  | 1.36 | 0.03 ns  |
| Cstf2         | cleavage stimulation factor, 3' pre-RNA subunit 2                                                 | 108062 | 1.47  | 1.92  | 2.46  | 0.59 | -0.19 ns |
| Ier3          | immediate early response 3                                                                        | 15937  | 4.74  | 4.26  | 4.82  | 0.98 | 0.45 ns  |
| Myo1c         | myosin IC                                                                                         | 17913  | 4.75  | 4.98  | 4.03  | 1.17 | 0.52 ns  |
| Zfr           | zinc finger RNA binding protein                                                                   | 22763  | 3.30  | 2.97  | 2.54  | 1.29 | 0.98 *** |
| Ddx5          | DEAD (Asp-Glu-Ala-Asp) box polypeptide 5                                                          | 13207  | 9.10  | 8.88  | 9.40  | 0.96 | -0.59 ns |
| Tle3          | transducin-like enhancer of split 3, homolog of Drosophila E(spl)                                 | 21887  | 0.53  | 0.63  | 0.66  | 0.80 | -0.38 ns |
| Slc25a36      | solute carrier family 25, member 36                                                               | 192287 | 1.81  | 1.83  | 1.98  | 0.91 | -0.57 ns |
| Chic2         | cysteine-rich hydrophobic domain 2                                                                | 74277  | 1.93  | 1.91  | 1.99  | 0.96 | 0.20 ns  |

|               |                                                                                        |        |       |       |       |      |          |
|---------------|----------------------------------------------------------------------------------------|--------|-------|-------|-------|------|----------|
| 1600012F09Rik | RIKEN cDNA 1600012F09 gene                                                             | 67008  | 0.60  | 0.59  | 0.55  | 1.07 | 0.13 ns  |
| Nupr1         | nuclear protein 1                                                                      | 56312  | 0.26  | 0.29  | 0.24  | 1.08 | -0.43 ns |
| Il17rc        | interleukin 17 receptor C                                                              | 171095 | 0.80  | 0.85  | 0.87  | 0.92 | -0.45 ns |
| Elac2         | elaC homolog 2 (E. coli)                                                               | 68626  | 0.36  | 0.33  | 0.35  | 1.02 | -0.49 ns |
| 2810408M09Rik |                                                                                        | 381406 | 0.21  | 0.27  | 0.41  | 0.50 | -0.49 ns |
| Trp53rk       |                                                                                        | 76367  | 0.21  | 0.27  | 0.41  | 0.50 | -0.49 ns |
| Upf1          | UPF1 regulator of nonsense transcripts homolog (yeast)                                 | 19704  | 0.27  | 0.33  | 0.39  | 0.69 | -0.61 ns |
| Prom1         | prominin 1                                                                             | 19126  | 2.42  | 1.40  | 1.07  | 2.25 | 0.42 ns  |
| Akap12        | A kinase (PRKA) anchor protein (gravin) 12                                             | 83397  | 3.16  | 3.92  | 3.50  | 0.90 | 0.06 ns  |
| Pou2f1        | POU domain, class 2, transcription factor 1                                            | 18986  | 0.38  | 0.38  | 0.28  | 1.34 | 0.67 ns  |
| Sema3e        | sema domain, immunoglobulin domain (Ig), short basic domain, secreted, (semaphorin) 3E | 20349  | 1.80  | 1.07  | 1.16  | 1.55 | -0.01 ns |
| Actb          | actin, beta, cytoplasmic                                                               | 11461  | 2.39  | 2.57  | 2.04  | 1.17 | -0.33 ns |
| Eif1ay        | eukaryotic translation initiation factor 1A, Y-linked                                  | 66235  | 2.96  | 3.91  | 4.15  | 0.71 | 0.07 ns  |
| Ldha          | lactate dehydrogenase A                                                                | 16828  | 13.60 | 13.41 | 17.54 | 0.77 | -0.29 ns |
| Tpm2          | tropomyosin 2, beta                                                                    | 22004  | 0.37  | 0.60  | 0.64  | 0.58 | -0.03 ns |
| Supt16h       | suppressor of Ty 16 homolog (S. cerevisiae)                                            | 114741 | 2.38  | 2.52  | 2.33  | 1.01 | 0.48 ns  |
| Carm1         | coactivator-associated arginine methyltransferase 1                                    | 59035  | 1.14  | 1.01  | 0.87  | 1.31 | 0.92 **  |
| 4933428G20Rik | RIKEN cDNA 4933428G20 gene                                                             | 58996  | 0.39  | 0.36  | 0.38  | 1.02 | 0.49 ns  |
| Myo5a         | myosin Va                                                                              | 17918  | 0.44  | 0.37  | 0.24  | 1.79 | 0.97 **  |
| Zfp628        | zinc finger protein 628                                                                | 232816 | 0.41  | 0.49  | 0.51  | 0.80 | -0.53 ns |
| Ccdc12        | coiled-coil domain containing 12                                                       | 72654  | 1.47  | 1.56  | 1.40  | 1.04 | 0.60 ns  |
| Ccdc56        | coiled-coil domain containing 56                                                       | 52469  | 4.80  | 5.03  | 6.76  | 0.71 | -0.35 ns |
| S100a1        | S100 calcium binding protein A1                                                        | 20193  | 1.97  | 2.09  | 0.99  | 1.99 | 0.74 ns  |
| Sec63         | SEC63-like (S. cerevisiae)                                                             | 140740 | 0.90  | 0.89  | 0.87  | 1.04 | 0.68 ns  |
| Pkhd1         | polycystic kidney and hepatic disease 1                                                | 241035 | 1.38  | 1.61  | 0.63  | 2.18 | 0.25 ns  |
| Gab2          | Growth factor receptor bound protein 2-associated pkb2                                 | 14389  | 0.37  | 0.38  | 0.35  | 1.05 | 0.48 ns  |
| Plec1         | plectin 1                                                                              | 18810  | 4.46  | 4.42  | 4.05  | 1.10 | 0.88 *   |
| Plk4          | polo-like kinase 4 (Drosophila)                                                        | 20873  | 3.28  | 3.50  | 3.25  | 1.01 | 0.56 ns  |
| Hdlbp         | high density lipoprotein (HDL) binding protein                                         | 110611 | 3.79  | 3.53  | 2.86  | 1.32 | 0.70 ns  |
| Csf1r         | colony stimulating factor 1 receptor                                                   | 12978  | 1.41  | 1.26  | 1.40  | 1.00 | -0.53 ns |
| Trim25        | tripartite motif protein 25                                                            | 217069 | 1.61  | 1.63  | 3.20  | 0.50 | -0.66 ns |
| Zc3h7a        | zinc finger CCH type containing 7 A                                                    | 106205 | 0.35  | 0.38  | 0.40  | 0.87 | -0.54 ns |
| Mphosph9      | M-phase phosphoprotein 9                                                               | 269702 | 0.73  | 0.81  | 0.71  | 1.03 | 0.55 ns  |
| Usp7          | ubiquitin specific peptidase 7                                                         | 252870 | 3.17  | 3.22  | 2.75  | 1.15 | 0.50 ns  |
| Atrnl1        | attractin like 1                                                                       | 226255 | 1.06  | 1.03  | 0.55  | 1.90 | 0.73 ns  |
| Txndc10       | thioredoxin domain containing 10                                                       | 67988  | 0.93  | 1.18  | 1.05  | 0.88 | 0.19 ns  |
| Rabif         | RAB interacting factor                                                                 | 98710  | 0.81  | 0.82  | 0.81  | 1.00 | -0.54 ns |
| Tnpo3         | transportin 3                                                                          | 320938 | 1.16  | 1.46  | 1.48  | 0.78 | -0.77 ns |
| Slc35a5       | solute carrier family 35, member A5                                                    | 74102  | 0.52  | 0.55  | 0.79  | 0.65 | -0.82 *  |
| Scp2          | Sterol carrier protein 2, liver                                                        | 20280  | 0.31  | 0.31  | 0.38  | 0.80 | -0.69 ns |
| Nfatc3        | nuclear factor of activated T-cells, cytoplasmic, calcineurin-dependent 3              | 18021  | 0.76  | 0.68  | 0.85  | 0.88 | -0.08 ns |
| D10Ert610e    | DNA segment, Chr 10, ERATO Doi 610, expressed                                          | 52666  | 0.37  | 0.32  | 0.25  | 1.48 | -0.12 ns |
| Zfp644        | zinc finger protein 644                                                                | 52397  | 1.49  | 1.23  | 1.64  | 0.91 | -0.59 ns |
| Igbbp1        | immunoglobulin (CD79A) binding protein 1                                               | 18518  | 1.89  | 1.68  | 2.84  | 0.66 | -0.54 ns |
| Wwv1          | WW, C2 and coiled-coil domain containing 1                                             | 211652 | 5.95  | 4.92  | 4.01  | 1.48 | 0.87 *   |
| Lss           | lanosterol synthase                                                                    | 16987  | 0.88  | 0.65  | 0.63  | 1.39 | 0.39 ns  |
| Suz12         | suppressor of zeste 12 homolog (Drosophila)                                            | 52615  | 2.73  | 2.70  | 2.24  | 1.21 | 0.78 ns  |
| Mcm3          |                                                                                        | 17215  | 4.51  | 4.82  | 3.52  | 1.28 | 0.74 ns  |
| Ppp2r2d       | protein phosphatase 2, regulatory subunit B, delta isoform                             | 52432  | 1.12  | 1.07  | 1.23  | 0.91 | -0.24 ns |
| Maf1          | MAF1 homolog (S. cerevisiae)                                                           | 68877  | 2.45  | 2.33  | 2.92  | 0.83 | -0.22 ns |
| D2Ert750e     | DNA segment, Chr 2, ERATO Doi 750, expressed                                           | 51944  | 1.20  | 1.07  | 1.13  | 1.06 | 0.56 ns  |
| Nfkbia        | nuclear factor of kappa light chain gene enhancer in B-cells inhibitor, alpha          | 18035  | 5.86  | 6.43  | 8.36  | 0.70 | -0.37 ns |
| Morc3         | microrchidia 3                                                                         | 338467 | 1.30  | 1.40  | 1.85  | 0.70 | -0.95 ** |
| Zscan21       | zinc finger and SCAN domain containing 21                                              | 22697  | 0.93  | 0.87  | 0.79  | 1.17 | -0.33 ns |
| 2410022L05Rik | RIKEN cDNA 2410022L05 gene                                                             | 66423  | 0.22  | 0.35  | 0.31  | 0.73 | -0.03 ns |
| Tcta          | T-cell leukemia translocation altered gene                                             | 102791 | 0.48  | 0.32  | 0.31  | 1.56 | 0.82 *   |
| D10Wsu52e     | DNA segment, Chr 10, Wayne State University 52, expressed                              | 28088  | 2.96  | 3.04  | 2.63  | 1.12 | -0.10 ns |
| Pttg1ip       | pituitary tumor-transforming 1 interacting protein                                     | 108705 | 4.51  | 4.01  | 4.56  | 0.98 | -0.42 ns |
| EG623356      | Predicted gene, EG623356                                                               | 623356 | 1.16  | 1.15  | 0.79  | 1.45 | -0.07 ns |
| Slc19a1       | solute carrier family 19 (sodium/hydrogen exchanger), member 1                         | 20509  | 0.62  | 0.55  | 0.48  | 1.30 | 0.67 ns  |
| Krr1          | KRR1, small subunit (SSU) processome component, homolog (yeast)                        | 52705  | 1.74  | 1.83  | 1.52  | 1.14 | 0.38 ns  |
| Abcf1         | ATP-binding cassette, sub-family F (GCN20), member 1                                   | 224742 | 2.00  | 2.07  | 1.46  | 1.36 | 0.83 *   |
| Myh9          | myosin, heavy polypeptide 9, non-muscle                                                | 17886  | 14.22 | 12.01 | 10.27 | 1.38 | 0.54 ns  |
| Tax1bp1       | Tax1 (human T-cell leukemia virus type I) binding protein 1                            | 52440  | 0.43  | 0.36  | 0.58  | 0.75 | -0.58 ns |
| Tbc1d14       | TBC1 domain family, member 14                                                          | 100855 | 2.06  | 2.18  | 1.77  | 1.16 | -0.08 ns |
| Clcn5         | chloride channel 5                                                                     | 12728  | 1.90  | 2.77  | 1.92  | 0.98 | -0.10 ns |
| 4930455C21Rik | RIKEN cDNA 4930455C21 gene                                                             | 76916  | 0.40  | 0.37  | 0.41  | 0.97 | -0.57 ns |
| Prss22        | protease, serine, 22                                                                   | 70835  | 0.83  | 0.73  | 1.14  | 0.73 | -0.22 ns |
| Denr          | density-regulated protein                                                              | 68184  | 2.24  | 2.30  | 2.22  | 1.00 | 0.03 ns  |
| Foxj2         | forkhead box J2                                                                        | 60611  | 0.59  | 0.63  | 0.80  | 0.74 | -0.55 ns |
| Sftpd         | surfactant associated protein D                                                        | 20390  | 0.23  | 0.21  | 0.45  | 0.52 | -0.66 ns |
| Mpv17         | Mpv17 transgene, kidney disease mutant                                                 | 17527  | 0.80  | 0.89  | 0.63  | 1.27 | 0.52 ns  |
| Spn           | SPEN homolog, transcriptional regulator (Drosophila)                                   | 56381  | 0.43  | 0.43  | 0.39  | 1.09 | 0.36 ns  |
| Sema3a        | sema domain, immunoglobulin domain (Ig), short basic domain, secreted, (semaphorin) 3A | 20346  | 0.48  | 0.27  | 0.08  | 5.74 | 0.49 ns  |
| Dhx32         | DEAH (Asp-Glu-Ala-His) box polypeptide 32                                              | 101437 | 0.40  | 0.60  | 0.91  | 0.44 | -0.90 *  |
| Cenpc1        | centromere protein C1                                                                  | 12617  | 0.45  | 0.62  | 0.82  | 0.55 | -0.76 ns |
| Pex11b        | peroxisomal biogenesis factor 11b                                                      | 18632  | 0.37  | 0.50  | 0.37  | 1.01 | 0.27 ns  |
| Mtpn          | myotrophin                                                                             | 14489  | 5.99  | 5.54  | 6.11  | 0.97 | -0.39 ns |
| Nap1l1        | nucleosome assembly protein 1-like 1                                                   | 53605  | 7.22  | 7.29  | 5.89  | 1.22 | 0.78 ns  |
| Nol7          | nucleolar protein 7                                                                    | 70078  | 3.53  | 3.86  | 4.25  | 0.83 | -0.25 ns |
| Mrps14        | mitochondrial ribosomal protein S14                                                    | 64659  | 2.48  | 2.23  | 2.04  | 1.21 | 0.17 ns  |
| Pcyt2         | phosphate cytidylyltransferase 2, ethanolamine                                         | 68671  | 0.84  | 0.82  | 0.95  | 0.88 | -0.11 ns |
| Vps26a        | vacuolar protein sorting 26 homolog A (yeast)                                          | 30930  | 1.42  | 1.24  | 1.23  | 1.15 | 0.24 ns  |
| Cebpz         | CCAAT/enhancer binding protein zeta                                                    | 12607  | 1.16  | 1.21  | 0.72  | 1.60 | 0.80 *   |

|               |                                                                                                                  |        |       |       |       |      |          |
|---------------|------------------------------------------------------------------------------------------------------------------|--------|-------|-------|-------|------|----------|
| Dnajc1        | DnaJ (Hsp40) homolog, subfamily C, member 1                                                                      | 13418  | 0.41  | 0.39  | 0.27  | 1.51 | 0.35 ns  |
| Sat1          | spermidine/spermine N1-acetyl transferase 1                                                                      | 20229  | 1.75  | 2.15  | 5.92  | 0.29 | -0.68 ns |
| Stxbp1        | syntaxin binding protein 1                                                                                       | 20910  | 0.42  | 0.45  | 0.28  | 1.48 | 0.52 ns  |
| Srfbp1        | serum response factor binding protein 1                                                                          | 67222  | 0.22  | 0.29  | 0.35  | 0.64 | -0.33 ns |
| Igsf9         | immunoglobulin superfamily, member 9                                                                             | 93842  | 0.62  | 0.70  | 0.63  | 0.98 | -0.52 ns |
| Rit1          | Ras-like without CAAX 1                                                                                          | 19769  | 0.49  | 0.50  | 0.49  | 1.01 | -0.38 ns |
| Rac3          | RAS-related C3 botulinum substrate 3                                                                             | 170758 | 0.46  | 0.56  | 0.31  | 1.48 | 0.40 ns  |
| Tcl1b3        | T-cell leukemia/lymphoma 1B, 3                                                                                   | 27378  | 1.39  | 1.35  | 1.12  | 1.24 | 0.66 ns  |
| Tead3         | TEA domain family member 3                                                                                       | 21678  | 0.36  | 0.34  | 0.30  | 1.21 | 0.62 ns  |
| Raet1a        |                                                                                                                  | 19368  | 0.56  | 0.47  | 0.35  | 1.56 | 0.89 ns  |
| Raet1b        |                                                                                                                  | 19369  | 0.56  | 0.47  | 0.35  | 1.56 | 0.89 ns  |
| Raet1c        |                                                                                                                  | 19370  | 0.56  | 0.47  | 0.35  | 1.56 | 0.89 ns  |
| Raet1d        |                                                                                                                  | 56554  | 0.56  | 0.47  | 0.35  | 1.56 | 0.89 ns  |
| Raet1e        |                                                                                                                  | 379043 | 0.56  | 0.47  | 0.35  | 1.56 | 0.89 ns  |
| Rbm18         | RNA binding motif protein 18                                                                                     | 67889  | 0.92  | 0.91  | 0.69  | 1.34 | 0.15 ns  |
| March7        | membrane-associated ring finger (C3HC4) 7                                                                        | 57438  | 5.81  | 4.65  | 3.91  | 1.48 | 0.67 ns  |
| Prkacb        | protein kinase, cAMP dependent, catalytic, beta                                                                  | 18749  | 1.44  | 1.55  | 1.10  | 1.31 | 0.18 ns  |
| Ash2l         | ash2 (absent, small, or homeotic)-like (Drosophila)                                                              | 23808  | 1.83  | 1.96  | 1.83  | 0.99 | 0.52 ns  |
| Cpeb4         | cytoplasmic polyadenylation element binding protein 4                                                            | 67579  | 1.82  | 1.77  | 2.91  | 0.62 | -0.81 ns |
| Aes           | amino-terminal enhancer of split                                                                                 | 14797  | 3.27  | 3.04  | 3.35  | 0.97 | -0.31 ns |
| Vamp8         | vesicle-associated membrane protein 8                                                                            | 22320  | 1.99  | 2.33  | 3.16  | 0.63 | -0.67 ns |
| Pura          | purine rich element binding protein A                                                                            | 19290  | 2.17  | 2.25  | 1.82  | 1.19 | 0.59 ns  |
| 8430419L09Rik | RIKEN cDNA 8430419L09 gene                                                                                       | 74525  | 1.64  | 1.61  | 1.45  | 1.13 | 0.05 ns  |
| Blcap         | bladder cancer associated protein homolog (human)                                                                | 53619  | 1.06  | 1.04  | 0.99  | 1.06 | 0.65 ns  |
| Smad2         | MAD homolog 2 (Drosophila)                                                                                       | 17126  | 1.02  | 0.86  | 1.03  | 0.99 | 0.31 ns  |
| Tcigr1        | T-cell, immune regulator 1, ATPase, H+ transporting, lysosomal V0 protein A3                                     | 27060  | 0.61  | 0.64  | 0.67  | 0.90 | -0.27 ns |
| Jmy           | junction-mediating and regulatory protein                                                                        | 57748  | 0.31  | 0.37  | 0.40  | 0.76 | -0.83 ns |
| Sqrdl         | sulfide quinone reductase-like (yeast)                                                                           | 59010  | 2.86  | 1.66  | 2.28  | 1.25 | 0.38 ns  |
| Krt8          |                                                                                                                  | 16691  | 18.85 | 16.97 | 14.62 | 1.28 | 0.66 ns  |
| Tgfb1         | transforming growth factor, beta 1                                                                               | 21803  | 0.59  | 0.66  | 0.73  | 0.80 | 0.26 ns  |
| Gbe1          | glucan (1,4-alpha-), branching enzyme 1                                                                          | 74185  | 0.44  | 0.36  | 0.52  | 0.84 | -0.50 ns |
| Procr         | protein C receptor, endothelial                                                                                  | 19124  | 0.10  | 0.17  | 1.13  | 0.08 | -0.56 ns |
| Chrm1         | cholinergic receptor, nicotinic, beta polypeptide 1 (muscle)                                                     | 11443  | 0.95  | 0.85  | 0.77  | 1.22 | 0.77 ns  |
| Bnpl          | BCL2/adenovirus E1B 19kD interacting protein like                                                                | 171388 | 0.19  | 0.28  | 0.42  | 0.46 | -0.51 ns |
| Csrp2         | cysteine and glycine-rich protein 2                                                                              | 13008  | 0.54  | 0.43  | 0.19  | 2.86 | 0.82 ns  |
| Ccndbp1       | cyclin D-type binding-protein 1                                                                                  | 17151  | 1.63  | 1.03  | 1.06  | 1.54 | 0.72 ns  |
| Dtx3          | deltex 3 homolog (Drosophila)                                                                                    | 80904  | 0.64  | 0.50  | 0.31  | 2.06 | 0.54 ns  |
| Tsc22d3       | TSC22 domain family 3                                                                                            | 14605  | 0.74  | 0.68  | 0.68  | 1.09 | 0.58 *   |
| Auh           | AU RNA binding protein/enoyl-coenzyme A hydratase                                                                | 11992  | 0.48  | 0.43  | 0.50  | 0.97 | 0.08 ns  |
| Fgf9          | fibroblast growth factor 9                                                                                       | 14180  | 0.25  | 0.30  | 0.10  | 2.58 | -0.05 ns |
| EG627557      |                                                                                                                  | 627557 | 1.60  | 1.52  | 1.44  | 1.11 | 0.00 ns  |
| Ncoo4         |                                                                                                                  | 27057  | 1.60  | 1.52  | 1.44  | 1.11 | 0.00 ns  |
| 1500003O03Rik | RIKEN cDNA 1500003O03 gene                                                                                       | 56398  | 0.79  | 0.69  | 1.39  | 0.56 | -0.87 ns |
| Ctnnb1        | catenin (cadherin associated protein), beta 1                                                                    | 12387  | 13.77 | 12.80 | 11.23 | 1.22 | 0.97 ns  |
| 2900073G15Rik | RIKEN cDNA 2900073G15 gene                                                                                       | 67268  | 9.82  | 9.84  | 8.21  | 1.19 | 0.80 ns  |
| Sgpp1         | sphingosine-1-phosphate phosphatase 1                                                                            | 81535  | 0.45  | 0.52  | 0.98  | 0.46 | -0.63 ns |
| Sema4d        | sema domain, immunoglobulin domain (Ig), transmembrane domain (TM) and short cytoplasmic domain, (semaphorin) 4D | 20354  | 1.87  | 1.98  | 1.32  | 1.41 | 0.38 ns  |
| Letm1         | leucine zipper-EF-hand containing transmembrane protein 1                                                        | 56384  | 0.36  | 0.48  | 0.48  | 0.74 | -0.51 ns |
| Ccng1         | cyclin G1                                                                                                        | 12450  | 2.01  | 2.06  | 3.84  | 0.52 | -0.89 ns |
| Vamp2         | vesicle-associated membrane protein 2                                                                            | 22318  | 0.36  | 0.45  | 0.38  | 0.96 | 0.00 ns  |
| Slc25a30      | solute carrier family 25, member 30                                                                              | 67554  | 1.27  | 1.32  | 1.28  | 0.99 | -0.47 ns |
| Plekha3       | pleckstrin homology domain-containing, family A (phosphoinositide binding specific) member 3                     | 83435  | 0.51  | 0.54  | 0.61  | 0.83 | -0.84 ns |
| Ptprf         | protein tyrosine phosphatase, receptor type, F                                                                   | 19268  | 3.73  | 3.76  | 3.95  | 0.94 | -0.43 *  |
| Mrps2         | mitochondrial ribosomal protein S2                                                                               | 118451 | 1.04  | 1.10  | 0.87  | 1.19 | 0.17 ns  |
| Crnk1         | Crn, crooked neck-like 1 (Drosophila)                                                                            | 66877  | 0.77  | 0.81  | 0.77  | 0.99 | 0.12 ns  |
| Pkia          | protein kinase inhibitor, alpha                                                                                  | 18767  | 0.41  | 0.48  | 0.17  | 2.40 | 0.74 *   |
| Dctn4         | dynactin 4                                                                                                       | 67665  | 0.99  | 1.21  | 1.04  | 0.95 | 0.19 ns  |
| Zfp161        | zinc finger protein 161                                                                                          | 22666  | 1.01  | 1.11  | 0.77  | 1.32 | 0.43 ns  |
| Mllt10        | myeloid/lymphoid or mixed lineage-leukemia translocation to 10 homolog (Drosophila)                              | 17354  | 1.29  | 1.19  | 1.01  | 1.26 | 0.49 ns  |
| Twf1          | twinfilin, actin-binding protein, homolog 1 (Drosophila)                                                         | 19230  | 2.91  | 3.07  | 3.24  | 0.89 | -0.61 ns |
| Acd           |                                                                                                                  | 497652 | 0.93  | 0.94  | 0.96  | 0.96 | 0.32 ns  |
| Nsd1          |                                                                                                                  | 18193  | 0.93  | 0.94  | 0.96  | 0.96 | 0.32 ns  |
| Bcl2l1        | Bcl2-like 1                                                                                                      | 12048  | 1.29  | 1.26  | 1.23  | 1.05 | 0.23 ns  |
| Hccs          | holocytochrome c synthetase                                                                                      | 15159  | 0.55  | 0.72  | 1.00  | 0.54 | -0.12 ns |
| Wnt7b         | wingless-related MMTV integration site 7B                                                                        | 22422  | 3.51  | 3.49  | 3.07  | 1.14 | 0.78 ns  |
| Tgfb1         | transforming growth factor, beta receptor I                                                                      | 21812  | 1.00  | 1.34  | 1.81  | 0.55 | -0.99 ns |
| Snap23        | synaptosomal-associated protein 23                                                                               | 20619  | 0.62  | 0.45  | 0.41  | 1.53 | 0.04 ns  |
| Rab18         | RAB18, member RAS oncogene family                                                                                | 19330  | 1.62  | 1.77  | 2.07  | 0.78 | -0.02 ns |
| Il17ra        | interleukin 17 receptor A                                                                                        | 16172  | 0.32  | 0.32  | 0.38  | 0.86 | -0.58 ns |
| Cd2ap         | CD2-associated protein                                                                                           | 12488  | 5.52  | 5.66  | 3.55  | 1.55 | 0.46 ns  |
| Vegfa         | vascular endothelial growth factor A                                                                             | 22339  | 0.80  | 0.78  | 0.90  | 0.88 | -0.78 ns |
| Mfge8         | milk fat globule-EGF factor 8 protein                                                                            | 17304  | 1.42  | 1.29  | 2.23  | 0.63 | -0.50 ns |
| Sgk3          | serum/glucocorticoid regulated kinase 3                                                                          | 170755 | 1.48  | 1.14  | 0.72  | 2.05 | 0.72 ns  |
| St6gal1       | beta galactoside alpha 2,6 sialyltransferase 1                                                                   | 20440  | 0.27  | 0.37  | 0.19  | 1.44 | -0.42 ns |
| Ctnnl1        | catenin (cadherin associated protein), alpha-like 1                                                              | 54366  | 1.01  | 0.96  | 0.78  | 1.29 | 0.00 ns  |
| Cpsf2         | cleavage and polyadenylation specific factor 2                                                                   | 51786  | 0.94  | 0.92  | 1.02  | 0.91 | -0.60 ns |
| Zfp185        | zinc finger protein 185                                                                                          | 22673  | 0.54  | 0.59  | 1.20  | 0.45 | -0.58 ns |
| Son           | Son cell proliferation protein                                                                                   | 20658  | 6.60  | 6.46  | 6.75  | 0.97 | -0.22 ns |
| Apc           | adenomatosis polyposis coli                                                                                      | 11789  | 1.13  | 1.23  | 0.97  | 1.16 | 0.39 *   |
| Enc1          | ectodermal-neural cortex 1                                                                                       | 13803  | 1.25  | 1.43  | 1.57  | 0.79 | -0.58 ns |
| Slc25a15      | solute carrier family 25 (mitochondrial carrier ornithine transporter), member 15                                | 18408  | 0.43  | 0.50  | 0.52  | 0.83 | -0.47 ns |
| Lmo4          | LIM domain only 4                                                                                                | 16911  | 2.11  | 2.20  | 1.31  | 1.60 | -0.07 ns |

|               |                                                                                  |        |       |       |       |      |           |
|---------------|----------------------------------------------------------------------------------|--------|-------|-------|-------|------|-----------|
| Chd1          | chromodomain helicase DNA binding protein 1                                      | 12648  | 0.42  | 0.34  | 0.35  | 1.18 | 0.33 ns   |
| Ankrd1        | ankyrin repeat domain 1 (cardiac muscle)                                         | 107765 | 1.04  | 1.53  | 1.89  | 0.55 | -0.58 ns  |
| Pole3         | polymerase (DNA directed), epsilon 3 (p17 subunit)                               | 59001  | 0.34  | 0.46  | 0.58  | 0.59 | -0.70 ns  |
| 1700021F05Rik | RIKEN cDNA 1700021F05 gene                                                       | 67851  | 1.01  | 1.03  | 0.86  | 1.16 | 0.31 ns   |
| Acyp1         | acylphosphatase 1, erythrocyte (common) type                                     | 66204  | 0.86  | 0.86  | 1.46  | 0.59 | -0.45 ns  |
| Pik3c2a       | phosphatidylinositol 3-kinase, C2 domain containing, alpha polypeptide           | 18704  | 2.50  | 2.21  | 2.01  | 1.24 | 0.42 ns   |
| Hbs1l         | Hbs1-like (S. cerevisiae)                                                        | 56422  | 1.36  | 1.53  | 1.11  | 1.22 | 0.35 ns   |
| Zfp64         | zinc finger protein 64                                                           | 22722  | 0.73  | 0.77  | 0.72  | 1.01 | -0.48 ns  |
| 2310016C08Rik | RIKEN cDNA 2310016C08 gene                                                       | 69573  | 0.18  | 0.27  | 0.39  | 0.46 | -0.56 ns  |
| Arhgef2       | rho/rac guanine nucleotide exchange factor (GEF) 2                               | 16800  | 0.90  | 1.08  | 0.78  | 1.15 | -0.27 ns  |
| LOC671878     |                                                                                  | 671878 | 0.72  | 0.90  | 1.27  | 0.56 | -0.11 ns  |
| Sms           |                                                                                  | 20603  | 0.72  | 0.90  | 1.27  | 0.56 | -0.11 ns  |
| Xpo4          |                                                                                  | 57258  | 0.38  | 0.40  | 0.33  | 1.15 | 0.79 ns   |
| Alg2          | asparagine-linked glycosylation 2 homolog (yeast, alpha-1,3-mannosyltransferase) | 56737  | 0.91  | 0.69  | 0.55  | 1.65 | 0.93 *    |
| Cita          | clathrin, light polypeptide (Lca)                                                | 12757  | 4.77  | 4.94  | 5.59  | 0.85 | -0.53 ns  |
| Jak2          | Janus kinase 2                                                                   | 16452  | 0.60  | 0.64  | 0.64  | 0.92 | 0.42 ns   |
| Banf1         | barrier to autointegration factor 1                                              | 23825  | 6.52  | 5.93  | 5.58  | 1.16 | 0.74 ns   |
| Zdhhc16       | zinc finger, DHHC domain containing 16                                           | 74168  | 1.14  | 1.24  | 1.13  | 1.00 | 0.04 ns   |
| Cbl1          | Casitas B-lineage lymphoma-like 1                                                | 104836 | 0.89  | 0.88  | 1.01  | 0.88 | -0.41 ns  |
| Rpgrip1       | retinitis pigmentosa GTPase regulator interacting protein 1                      | 77945  | 3.17  | 3.80  | 3.46  | 0.91 | -0.09 ns  |
| Terf2         | telomeric repeat binding factor 2                                                | 21750  | 0.90  | 0.93  | 0.55  | 1.64 | 0.81 *    |
| Atn1          | atrophin 1                                                                       | 13498  | 0.49  | 0.50  | 0.58  | 0.85 | -0.43 ns  |
| Epha2         | Eph receptor A2                                                                  | 13836  | 0.46  | 0.43  | 0.49  | 0.93 | -0.63 ns  |
| Arhgef1       | Rho guanine nucleotide exchange factor (GEF) 1                                   | 16801  | 0.71  | 0.71  | 0.84  | 0.85 | -0.88 *   |
| Adam12        | a disintegrin and metallopeptidase domain 12 (meltrin alpha)                     | 11489  | 0.23  | 0.20  | 0.23  | 0.97 | 0.03 ns   |
| Gopc          | golgi associated PDZ and coiled-coil motif containing                            | 94221  | 0.41  | 0.47  | 0.57  | 0.72 | -0.74 ns  |
| Acin1         | apoptotic chromatin condensation inducer 1                                       | 56215  | 1.31  | 1.46  | 1.35  | 0.96 | 0.31 ns   |
| Atm           | ataxia telangiectasia mutated homolog (human)                                    | 11920  | 0.73  | 0.64  | 0.50  | 1.43 | 0.73 ns   |
| Lgals9        | lectin, galactose binding, soluble 9                                             | 16859  | 0.23  | 0.49  | 1.92  | 0.12 | -0.66 ns  |
| Anxa4         | annexin A4                                                                       | 11746  | 4.83  | 5.27  | 6.38  | 0.75 | -0.98 *** |
| Srm           | spermidine synthase                                                              | 20810  | 0.88  | 0.90  | 0.87  | 1.01 | -0.19 ns  |
| Lipg          | lipase, endothelial                                                              | 16891  | 0.43  | 0.37  | 0.26  | 1.65 | 0.93 **   |
| Rbm38         | RNA binding motif protein 38                                                     | 56190  | 0.59  | 0.52  | 0.81  | 0.72 | -0.72 ns  |
| Lamc2         | laminin, gamma 2                                                                 | 16782  | 1.67  | 2.46  | 2.73  | 0.61 | -0.45 ns  |
| Myb           | myeloblastosis oncogene                                                          | 17863  | 0.41  | 0.33  | 0.11  | 3.61 | 0.63 ns   |
| Net1          | neuroepithelial cell transforming gene 1                                         | 56349  | 0.77  | 0.71  | 1.26  | 0.61 | -0.65 ns  |
| G3bp2         | GTPase activating protein (SH3 domain) binding protein 2                         | 23881  | 3.30  | 3.15  | 2.56  | 1.28 | 0.49 ns   |
| Mynn          | myoneurin                                                                        | 80732  | 0.71  | 0.58  | 0.49  | 1.44 | 0.53 ns   |
| Map3k5        |                                                                                  | 26408  | 0.38  | 0.28  | 0.35  | 1.06 | -0.45 ns  |
| Jub           | ajuba                                                                            | 16475  | 4.14  | 4.57  | 3.74  | 1.10 | 0.31 ns   |
| S100a6        | S100 calcium binding protein A6 (calcyclin)                                      | 20200  | 17.10 | 16.71 | 14.34 | 1.19 | 0.67 ns   |
| Nck1          | non-catalytic region of tyrosine kinase adaptor protein 1                        | 17973  | 0.30  | 0.26  | 0.35  | 0.87 | 0.19 ns   |
| Zfp120        | zinc finger protein 120                                                          | 104348 | 0.27  | 0.28  | 0.37  | 0.71 | -0.45 ns  |
| Txnrd1        | thioredoxin reductase 1                                                          | 50493  | 3.79  | 4.00  | 3.19  | 1.18 | -0.13 ns  |
| Dfna5h        | deafness, autosomal dominant 5 homolog (human)                                   | 54722  | 0.63  | 0.67  | 0.94  | 0.67 | -0.08 ns  |
| Txn2          | thioredoxin 2                                                                    | 56551  | 0.84  | 0.76  | 0.94  | 0.89 | -0.52 ns  |
| Il18r1        | interleukin 18 receptor 1                                                        | 16182  | 0.18  | 0.22  | 0.20  | 0.88 | 0.08 ns   |
| Tank          | TRAF family member-associated Nf-kappa B activator                               | 21353  | 0.58  | 0.37  | 0.29  | 2.01 | 0.57 ns   |
| Lmna          | lamin A                                                                          | 16905  | 3.44  | 3.62  | 3.02  | 1.13 | 0.74 ns   |
| Tusc3         | tumor suppressor candidate 3                                                     | 80286  | 2.61  | 2.84  | 3.36  | 0.77 | -0.12 ns  |
| Styx          | phosphoserine/threonine/tyrosine interaction protein                             | 56291  | 0.82  | 0.88  | 0.65  | 1.25 | 0.59 ns   |
| Fert2         | fer (fms/fps related) protein kinase, testis specific 2                          | 14158  | 0.57  | 0.49  | 0.45  | 1.25 | 0.89 *    |
| Tpst1         | protein-tyrosine sulfotransferase 1                                              | 22021  | 0.68  | 0.59  | 0.44  | 1.52 | 0.91 *    |
| Pcbp2         | poly(rC) binding protein 2                                                       | 18521  | 14.94 | 12.49 | 13.53 | 1.10 | 0.63 ns   |
| Vbp1          | von Hippel-Lindau binding protein 1                                              | 22327  | 2.65  | 2.35  | 3.65  | 0.72 | -0.27 ns  |
| Psm14         | proteasome (prosome, macropain) 26S subunit, non-ATPase, 14                      | 59029  | 4.88  | 3.97  | 3.43  | 1.41 | 0.95 **   |
| Gpr19         | G protein-coupled receptor 19                                                    | 14760  | 0.42  | 0.37  | 0.59  | 0.70 | -0.55 ns  |
| Cox7a2l       | cytochrome c oxidase subunit VIIa polypeptide 2-like                             | 20463  | 5.51  | 4.81  | 3.16  | 1.73 | 0.96 **   |
| Efna4         | ephrin A4                                                                        | 13639  | 0.58  | 0.52  | 0.36  | 1.62 | 0.30 ns   |
| Dgcr2         | DiGeorge syndrome critical region gene 2                                         | 13356  | 1.38  | 1.25  | 1.20  | 1.14 | 0.68 ns   |
| LOC640441     |                                                                                  | 640441 | 4.55  | 2.95  | 2.64  | 1.71 | 0.53 ns   |
| Thbs1         |                                                                                  | 21825  | 4.55  | 2.95  | 2.64  | 1.71 | 0.53 ns   |
| Tapbp         | TAP binding protein                                                              | 21356  | 2.66  | 3.32  | 3.65  | 0.72 | -0.85 *   |
| Msn           | moesin                                                                           | 17698  | 3.18  | 3.03  | 4.46  | 0.71 | -0.28 ns  |
| LOC630729     | similar to Glutathione reductase, mitochondrial precursor (GR) (GRase)           | 630729 | 1.45  | 1.53  | 1.86  | 0.78 | 0.05 ns   |
| Gsr           | glutathione reductase 1                                                          | 14782  | 1.74  | 2.00  | 1.95  | 0.89 | 0.26 ns   |
| Bcl6          | B-cell leukemia/lymphoma 6                                                       | 12053  | 0.31  | 0.36  | 0.37  | 0.85 | -0.65 ns  |
| LOC671392     |                                                                                  | 671392 | 5.71  | 5.38  | 4.08  | 1.39 | 0.67 ns   |
| Nf2           | neurofibromatosis 2                                                              | 18016  | 0.93  | 0.85  | 1.13  | 0.81 | -0.40 ns  |
| Ldlr          | low density lipoprotein receptor                                                 | 16835  | 2.64  | 1.87  | 2.52  | 1.04 | 0.44 ns   |
| Ppp2cb        | protein phosphatase 2 (formerly 2A), catalytic subunit, beta isoform             | 19053  | 2.18  | 2.46  | 2.82  | 0.77 | -0.19 ns  |
| Mtap7         | microtubule-associated protein 7                                                 | 17761  | 0.70  | 0.53  | 0.64  | 1.09 | 0.01 ns   |
| Mtap7         | microtubule-associated protein 7                                                 | 17761  | 1.12  | 1.22  | 1.41  | 0.79 | -0.71 ns  |
| Fgfr3         | fibroblast growth factor receptor 3                                              | 14184  | 0.55  | 0.54  | 1.08  | 0.50 | -0.41 ns  |
| Wsb2          | WD repeat and SOCS box-containing 2                                              | 59043  | 1.59  | 1.44  | 1.50  | 1.06 | 0.58 ns   |
| Stag2         | stromal antigen 2                                                                | 20843  | 2.47  | 2.25  | 3.63  | 0.68 | -0.46 ns  |
| Kcnk5         | potassium channel, subfamily K, member 5                                         | 16529  | 0.25  | 0.40  | 0.49  | 0.50 | -0.85 *   |
| Psen1         | presenilin 1                                                                     | 19164  | 2.98  | 2.83  | 3.24  | 0.91 | -0.31 ns  |
| Adam17        | a disintegrin and metallopeptidase domain 17                                     | 11491  | 1.91  | 2.06  | 2.33  | 0.82 | -0.46 ns  |
| Clstn1        | calsyntenin 1                                                                    | 65945  | 1.56  | 1.68  | 1.52  | 1.02 | 0.28 ns   |
| Nr3c1         | nuclear receptor subfamily 3, group C, member 1                                  | 14815  | 1.61  | 1.81  | 1.12  | 1.43 | 0.50 ns   |
| Trim44        | tripartite motif-containing 44                                                   | 80985  | 3.32  | 2.84  | 2.62  | 1.26 | 0.35 ns   |
| Rab24         | RAB24, member RAS oncogene family                                                | 19336  | 1.24  | 1.26  | 1.76  | 0.70 | -0.52 ns  |
| Mrps23        | mitochondrial ribosomal protein S23                                              | 64656  | 0.75  | 0.74  | 0.94  | 0.79 | -0.59 ns  |
| Mapk9         | mitogen activated protein kinase 9                                               | 26420  | 0.49  | 0.56  | 0.71  | 0.69 | -0.65 ns  |
| Mtmr1         | myotubularin related protein 1                                                   | 53332  | 0.32  | 0.27  | 0.41  | 0.78 | -0.43 ns  |

|           |                                                                |        |       |       |       |      |           |
|-----------|----------------------------------------------------------------|--------|-------|-------|-------|------|-----------|
| Tpp2      | tripeptidyl peptidase II                                       | 22019  | 0.77  | 0.85  | 0.84  | 0.92 | -0.44 ns  |
| Eif2ak1   | eukaryotic translation initiation factor 2 alpha kinase 1      | 15467  | 0.59  | 0.59  | 0.61  | 0.97 | -0.65 ns  |
| Tgs1      | trimethylguanosine synthase homolog (S. cerevisiae)            | 116940 | 0.73  | 0.71  | 0.67  | 1.09 | 0.11 ns   |
| Tcf20     | transcription factor 20                                        | 21411  | 1.21  | 1.06  | 0.65  | 1.87 | 0.82 *    |
| Mrpl19    | mitochondrial ribosomal protein L19                            | 56284  | 0.90  | 0.88  | 1.04  | 0.86 | -0.59 ns  |
| Dapp1     | dual adaptor for phosphotyrosine and 3-phosphoinositides 1     | 26377  | 0.39  | 0.42  | 0.39  | 1.00 | -0.53 ns  |
| Serhl     | serine hydrolase-like                                          | 68607  | 0.45  | 0.52  | 0.45  | 0.99 | -0.42 ns  |
| Tgfa      | transforming growth factor alpha                               | 21802  | 0.88  | 0.89  | 1.25  | 0.70 | -0.46 ns  |
| Ccdc123   | coiled-coil domain containing 123                              | 72140  | 0.54  | 0.66  | 0.45  | 1.19 | 0.34 ns   |
| Pfdn2     | prefoldin 2                                                    | 18637  | 1.75  | 1.56  | 1.39  | 1.25 | 0.85 *    |
| Cdc25b    | cell division cycle 25 homolog B (S. pombe)                    | 12531  | 1.34  | 1.43  | 2.41  | 0.55 | -0.23 ns  |
| Notch3    | Notch gene homolog 3 (Drosophila)                              | 18131  | 1.53  | 1.47  | 1.13  | 1.35 | 0.28 ns   |
| Mrps34    | mitochondrial ribosomal protein S34                            | 79044  | 2.06  | 1.83  | 1.58  | 1.29 | 0.61 ns   |
| Tcfap2a   | transcription factor AP-2, alpha                               | 21418  | 2.48  | 2.01  | 2.19  | 1.13 | 0.31 ns   |
| Tor3a     | torsin family 3, member A                                      | 30935  | 0.84  | 0.76  | 0.72  | 1.16 | 0.23 ns   |
| Abcb8     | ATP-binding cassette, sub-family B (MDR/TAP), member 8         | 74610  | 0.36  | 0.49  | 0.33  | 1.08 | 0.23 ns   |
| Cenph     | centromere protein H                                           | 26886  | 0.42  | 0.56  | 0.98  | 0.42 | -0.60 ns  |
| Hivep2    | human immunodeficiency virus type 1 enhancer binding protein 2 | 15273  | 0.30  | 0.30  | 0.28  | 1.07 | -0.16 ns  |
| Zfand6    | zinc finger, AN1-type domain 6                                 | 65098  | 4.49  | 4.34  | 5.58  | 0.80 | -0.55 ns  |
| Ptpn12    | protein tyrosine phosphatase, non-receptor type 12             | 19248  | 2.80  | 3.38  | 3.78  | 0.74 | -0.98 *** |
| Stat5b    | signal transducer and activator of transcription 5B            | 20851  | 0.47  | 0.59  | 0.67  | 0.70 | -0.40 ns  |
| Plau      | plasminogen activator, urokinase                               | 18792  | 0.39  | 0.36  | 0.31  | 1.25 | 0.50 ns   |
| EG544872  |                                                                | 544872 | 29.43 | 25.00 | 19.73 | 1.48 | 0.93 **   |
| EG546164  |                                                                | 546164 | 29.43 | 25.00 | 19.73 | 1.48 | 0.93 **   |
| EG620248  |                                                                | 620248 | 29.43 | 25.00 | 19.73 | 1.48 | 0.93 **   |
| EG667279  |                                                                | 667279 | 29.43 | 25.00 | 19.73 | 1.48 | 0.93 **   |
| EG667846  |                                                                | 667846 | 29.43 | 25.00 | 19.73 | 1.48 | 0.93 **   |
| EG667847  |                                                                | 667847 | 29.43 | 25.00 | 19.73 | 1.48 | 0.93 **   |
| LOC546298 |                                                                | 546298 | 29.43 | 25.00 | 19.73 | 1.48 | 0.93 **   |
| LOC637606 |                                                                | 637606 | 29.43 | 25.00 | 19.73 | 1.48 | 0.93 **   |
| LOC671929 |                                                                | 671929 | 29.43 | 25.00 | 19.73 | 1.48 | 0.93 **   |
| LOC672594 |                                                                | 672594 | 29.43 | 25.00 | 19.73 | 1.48 | 0.93 **   |
| Rps2      |                                                                | 16898  | 29.43 | 25.00 | 19.73 | 1.48 | 0.93 **   |
| Itgb1bp1  | integrin beta 1 binding protein 1                              | 16413  | 0.67  | 0.71  | 0.80  | 0.83 | -0.31 ns  |
| Rab17     | RAB17, member RAS oncogene family                              | 19329  | 0.40  | 0.33  | 0.20  | 1.99 | 0.09 ns   |
| Cyb5r3    | cytochrome b5 reductase 3                                      | 109754 | 5.67  | 5.79  | 6.12  | 0.92 | -0.28 ns  |
| Gnb5      | guanine nucleotide binding protein, beta 5                     | 14697  | 0.44  | 0.36  | 0.32  | 1.38 | 0.68 ns   |
| B3gnt3    | UDP-GlcNAc:betaGal beta-1,3-N-acetylglucosaminyltransferase 3  | 72297  | 0.24  | 0.25  | 0.40  | 0.61 | -0.76 ns  |
| Ndufa1    | NADH dehydrogenase (ubiquinone) 1 alpha subcomplex, 1          | 54405  | 2.62  | 3.08  | 4.90  | 0.53 | -0.58 ns  |
| Rps6kb2   | ribosomal protein S6 kinase, polypeptide 2                     | 58988  | 0.47  | 0.39  | 0.32  | 1.44 | 0.80 ns   |
| Tgif1     | TG interacting factor 1                                        | 21815  | 1.14  | 0.99  | 0.73  | 1.55 | 0.41 ns   |
| Kctd1     | potassium channel tetramerisation domain containing 1          | 106931 | 0.38  | 0.41  | 0.39  | 0.97 | -0.15 ns  |
| EG665937  |                                                                | 665937 | 7.62  | 7.27  | 7.96  | 0.95 | -0.50 ns  |
| Ftl2      |                                                                | 14337  | 7.62  | 7.27  | 7.96  | 0.95 | -0.50 ns  |
| LOC634386 |                                                                | 634386 | 7.62  | 7.27  | 7.96  | 0.95 | -0.50 ns  |
| G6pd2     |                                                                | 14380  | 0.33  | 0.26  | 0.54  | 0.60 | -0.77 ns  |
| Hras1     | Harvey rat sarcoma virus oncogene 1                            | 15461  | 0.81  | 0.86  | 0.97  | 0.83 | -0.43 ns  |
| Supt4h1   |                                                                | 20922  | 2.11  | 1.72  | 2.01  | 1.05 | 0.05 ns   |
| Rnf14     | ring finger protein 14                                         | 56736  | 1.13  | 1.23  | 1.28  | 0.88 | -0.10 ns  |
| Figl1     | figletin-like 1                                                | 60530  | 1.99  | 1.94  | 2.38  | 0.83 | -0.01 ns  |
| Idh1      | isocitrate dehydrogenase 1 (NADP+), soluble                    | 15926  | 1.59  | 1.98  | 1.66  | 0.95 | -0.51 ns  |
| Ephx1     | epoxide hydrolase 1, microsomal                                | 13849  | 0.78  | 0.79  | 1.12  | 0.69 | -0.82 *   |
| LOC640611 |                                                                | 640611 | 3.00  | 3.08  | 2.63  | 1.14 | -0.33 ns  |
| Cdk4      | cyclin-dependent kinase 4                                      | 12567  | 4.46  | 4.04  | 3.15  | 1.41 | 0.25 ns   |
| Smu1      | smu-1 suppressor of mec-8 and unc-52 homolog (C. elegans)      | 74255  | 2.23  | 2.38  | 2.89  | 0.77 | -0.39 ns  |
| Xpnpep1   | X-prolyl aminopeptidase (aminopeptidase P) 1, soluble          | 170750 | 2.75  | 2.78  | 3.42  | 0.80 | -0.36 ns  |
| Itga6     | integrin alpha 6                                               | 16403  | 1.28  | 1.57  | 1.48  | 0.86 | -0.66 ns  |
| Rcn2      | reticulocalbin 2                                               | 26611  | 2.89  | 2.54  | 2.20  | 1.31 | 0.95 **   |
| Mrps21    | mitochondrial ribosomal protein S21                            | 66292  | 1.93  | 1.98  | 1.89  | 1.01 | -0.23 ns  |
| Bag3      | Bcl2-associated athanogene 3                                   | 29810  | 0.42  | 0.36  | 0.40  | 1.05 | 0.42 ns   |
| Prpf8     | pre-mRNA processing factor 8                                   | 192159 | 4.22  | 4.10  | 3.16  | 1.33 | 0.63 ns   |
| Nsf       | N-ethylmaleimide sensitive fusion protein                      | 18195  | 1.10  | 0.93  | 0.94  | 1.17 | 0.67 ns   |
| Sumo3     | SMT3 suppressor of mif two 3 homolog 3 (yeast)                 | 20610  | 5.31  | 4.89  | 4.85  | 1.09 | 0.11 ns   |
| Psm13     | proteasome (prosome, macropain) 26S subunit, non-ATPase, 13    | 23997  | 1.03  | 1.31  | 1.26  | 0.81 | -0.32 ns  |
| Mad2l1    | MAD2 (mitotic arrest deficient, homolog)-like 1 (yeast)        | 56150  | 3.60  | 3.78  | 5.03  | 0.71 | -0.29 ns  |
| Ube2t     | ubiquitin-conjugating enzyme E2T (putative)                    | 67196  | 0.72  | 0.70  | 0.77  | 0.93 | 0.04 ns   |
| Mrpl3     | mitochondrial ribosomal protein L3                             | 94062  | 0.85  | 0.74  | 0.78  | 1.08 | 0.64 ns   |
| Nxn       | nucleoredoxin                                                  | 18230  | 0.34  | 0.37  | 0.25  | 1.33 | 0.34 ns   |
| Ppt1      | palmitoyl-protein thioesterase 1                               | 19063  | 0.90  | 0.84  | 0.94  | 0.95 | -0.61 ns  |
| Bnip3     | BCL2/adenovirus E1B interacting protein 1, NIP3                | 12176  | 5.31  | 5.66  | 9.69  | 0.55 | -0.69 ns  |
| Pex13     | peroxisomal biogenesis factor 13                               | 72129  | 1.08  | 1.02  | 1.05  | 1.02 | 0.22 ns   |
| Rps3a     | ribosomal protein S3a                                          | 20091  | 31.96 | 30.09 | 23.52 | 1.35 | 0.87 *    |
| Ifi30     | interferon gamma inducible protein 30                          | 65972  | 2.28  | 2.17  | 2.20  | 1.03 | -0.13 ns  |
| Acsc2     | acyl-CoA synthetase short-chain family member 2                | 60525  | 0.17  | 0.17  | 0.46  | 0.37 | -0.65 ns  |
| Snx3      | sorting nexin 3                                                | 54198  | 5.56  | 4.73  | 4.96  | 1.12 | 0.10 ns   |
| Ruvbl2    | RuvB-like protein 2                                            | 20174  | 2.10  | 2.24  | 2.68  | 0.78 | -0.22 ns  |
| Smad4     | MAD homolog 4 (Drosophila)                                     | 17128  | 3.83  | 4.07  | 4.03  | 0.95 | 0.34 ns   |
| Nxt1      | NTF2-related export protein 1                                  | 56488  | 1.37  | 1.37  | 1.67  | 0.82 | -0.31 ns  |
| Gcs1      | glucosidase 1                                                  | 57377  | 1.17  | 1.30  | 1.28  | 0.91 | -0.29 ns  |
| Bnip2     | BCL2/adenovirus E1B interacting protein 1, NIP2                | 12175  | 1.26  | 1.06  | 0.93  | 1.35 | 0.87 *    |
| Cpox      | coproporphyrinogen oxidase                                     | 12892  | 0.52  | 0.74  | 1.51  | 0.34 | -0.85 *   |
| Slc30a5   | solute carrier family 30 (zinc transporter), member 5          | 69048  | 0.78  | 0.95  | 1.07  | 0.72 | -0.93 **  |
| Parp1     | poly (ADP-ribose) polymerase family, member 1                  | 11545  | 1.71  | 1.65  | 1.35  | 1.26 | 0.40 ns   |
| Cstb      | cystatin B                                                     | 13014  | 10.37 | 9.52  | 8.81  | 1.17 | 0.66 ns   |
| Atp6v1a   | ATPase, H+ transporting, lysosomal V1 subunit A                | 11964  | 2.83  | 2.53  | 3.14  | 0.89 | -0.46 ns  |
| U2af1     | U2 small nuclear ribonucleoprotein auxiliary factor (U2AF) 1   | 108121 | 3.63  | 3.68  | 2.69  | 1.34 | 0.86 *    |

|               |                                                                                                                |        |       |       |       |      |           |
|---------------|----------------------------------------------------------------------------------------------------------------|--------|-------|-------|-------|------|-----------|
| Ctdspl        | CTD (carboxy-terminal domain, RNA polymerase II, polypeptide A) small phosphatase-like                         | 69274  | 1.58  | 1.51  | 1.19  | 1.32 | 0.80 ns   |
| Ogfr          | opioid growth factor receptor                                                                                  | 72075  | 0.80  | 1.01  | 0.98  | 0.81 | -0.45 ns  |
| Ccnf          | cyclin F                                                                                                       | 12449  | 0.79  | 0.77  | 0.64  | 1.22 | 0.69 ns   |
| Fibp          | fibroblast growth factor (acidic) intracellular binding protein                                                | 58249  | 1.28  | 1.29  | 1.00  | 1.28 | 0.33 ns   |
| Znrd1         | zinc ribbon domain containing, 1                                                                               | 66136  | 1.34  | 1.36  | 0.90  | 1.48 | 0.91 *    |
| Cask          | calcium/calmodulin-dependent serine protein kinase (MAGUK family)                                              | 12361  | 0.65  | 0.56  | 0.84  | 0.77 | 0.14 ns   |
| Fxr2          | fragile X mental retardation, autosomal homolog 2                                                              | 23879  | 0.52  | 0.53  | 0.67  | 0.78 | -0.49 ns  |
| Abcb6         | ATP-binding cassette, sub-family B (MDR/TAP), member 6                                                         | 74104  | 0.65  | 0.71  | 0.56  | 1.16 | 0.59 ns   |
| Atp5k         | ATP synthase, H+ transporting, mitochondrial F1F0 complex, subunit e                                           | 11958  | 6.01  | 5.53  | 5.66  | 1.06 | 0.13 ns   |
| Xpc           | xeroderma pigmentosum, complementation group C                                                                 | 22591  | 0.50  | 0.49  | 0.55  | 0.90 | -0.43 ns  |
| Ccne2         | cyclin E2                                                                                                      | 12448  | 0.45  | 0.57  | 1.01  | 0.45 | -0.67 ns  |
| Extl2         | exotoses (multiple)-like 2                                                                                     | 58193  | 0.82  | 0.82  | 0.43  | 1.90 | 0.78 ns   |
| Ptprm         | protein tyrosine phosphatase, receptor type, M                                                                 | 19274  | 0.81  | 0.45  | 0.23  | 3.48 | 0.80 ns   |
| Ranbp1        | RAN binding protein 1                                                                                          | 19385  | 10.62 | 9.71  | 10.34 | 1.02 | 0.21 ns   |
| Arl2          | ADP-ribosylation factor-like 2                                                                                 | 56327  | 0.90  | 0.77  | 0.66  | 1.37 | 0.91 *    |
| Ndnl2         | neccdin-like 2                                                                                                 | 66647  | 0.35  | 0.38  | 0.56  | 0.63 | -0.83 *   |
| Mt1           | metallothionein 1                                                                                              | 17748  | 13.00 | 10.67 | 7.22  | 1.79 | 0.17 ns   |
| Ube2n         | ubiquitin-conjugating enzyme E2N                                                                               | 93765  | 3.18  | 2.40  | 2.34  | 1.35 | 0.54 ns   |
| Adamts5       | a disintegrin-like and metalloproteinase (reprolysin type) with thrombospondin type 1 motif, 5 (aggrecanase-2) | 23794  | 2.77  | 1.98  | 2.22  | 1.24 | 0.13 ns   |
| Ndel1         | nuclear distribution gene E-like homolog 1 (A. nidulans)                                                       | 83431  | 1.61  | 1.58  | 2.15  | 0.74 | -0.35 ns  |
| Yy1           | YY1 transcription factor                                                                                       | 22632  | 5.59  | 5.65  | 5.81  | 0.96 | -0.19 ns  |
| Yy1           | YY1 transcription factor                                                                                       | 22632  | 0.50  | 0.42  | 0.42  | 1.20 | -0.07 ns  |
| Rhog          | ras homolog gene family, member G                                                                              | 56212  | 0.71  | 0.62  | 0.68  | 1.04 | 0.52 ns   |
| Ampd3         | AMP deaminase 3                                                                                                | 11717  | 0.57  | 0.64  | 0.42  | 1.33 | -0.03 ns  |
| EG628438      |                                                                                                                | 628438 | 1.19  | 1.16  | 0.79  | 1.50 | 0.83 *    |
| Pias1         | protein inhibitor of activated STAT 1                                                                          | 56469  | 1.23  | 0.99  | 1.10  | 1.12 | 0.59 ns   |
| Skiv2l        | superkiller viralicidal activity 2-like (S. cerevisiae)                                                        | 108077 | 0.63  | 0.55  | 0.34  | 1.86 | 0.95 **   |
| Ap3s1         | adaptor-related protein complex 3, sigma 1 subunit                                                             | 11777  | 1.97  | 1.75  | 2.64  | 0.74 | -0.20 ns  |
| 5730470L24Rik | RIKEN cDNA 5730470L24 gene                                                                                     | 66641  | 0.55  | 0.56  | 0.40  | 1.36 | 0.62 ns   |
| Zfp143        | zinc finger protein 143                                                                                        | 20841  | 0.35  | 0.38  | 0.46  | 0.76 | -0.78 ns  |
| Serpib9       | serine (or cysteine) peptidase inhibitor, clade B, member 9                                                    | 20723  | 0.52  | 0.78  | 1.35  | 0.38 | -0.97 **  |
| Rnase4        | ribonuclease, RNase A family 4                                                                                 | 58809  | 0.41  | 0.87  | 0.53  | 0.77 | 0.14 ns   |
| Hk2           | hexokinase 2                                                                                                   | 15277  | 1.22  | 1.66  | 2.59  | 0.47 | -0.94 **  |
| Rpl7a         | ribosomal protein L7a                                                                                          | 27176  | 26.27 | 23.21 | 17.06 | 1.53 | 0.90 *    |
| Bloc1s1       | biogenesis of lysosome-related organelles complex-1, subunit 1                                                 | 14533  | 1.05  | 1.05  | 1.08  | 0.96 | -0.40 ns  |
| Wdr54         | WD repeat domain 54                                                                                            | 75659  | 0.21  | 0.22  | 0.38  | 0.54 | -0.70 ns  |
| Ppap2a        | phosphatidic acid phosphatase 2a                                                                               | 19012  | 0.43  | 0.54  | 0.65  | 0.66 | -0.98 *** |
| Ranbp2        | RAN binding protein 2                                                                                          | 19386  | 1.61  | 1.51  | 1.46  | 1.10 | 0.13 ns   |
| Rev1          | REV1 homolog (S. cerevisiae)                                                                                   | 56210  | 0.43  | 0.50  | 0.44  | 0.96 | -0.42 ns  |
| Mkks          | McKusick-Kaufman syndrome protein                                                                              | 59030  | 0.56  | 0.36  | 0.53  | 1.05 | 0.00 ns   |
| Shroom3       | shroom family member 3                                                                                         | 27428  | 1.71  | 1.79  | 2.50  | 0.68 | -0.76 ns  |
| Rad50         | RAD50 homolog (S. cerevisiae)                                                                                  | 19360  | 1.01  | 1.01  | 1.33  | 0.75 | -0.46 ns  |
| Ahr           | aryl-hydrocarbon receptor                                                                                      | 11622  | 3.30  | 3.58  | 3.82  | 0.86 | -0.21 ns  |
| Dmtf1         | cyclin D binding myb-like transcription factor 1                                                               | 23857  | 1.52  | 1.48  | 1.76  | 0.86 | -0.41 ns  |
| Rassf5        | Ras association (RalGDS/AF-6) domain family 5                                                                  | 54354  | 0.37  | 0.30  | 0.21  | 1.75 | 0.15 ns   |
| Ring1         | ring finger protein 1                                                                                          | 19763  | 0.71  | 0.50  | 0.40  | 1.78 | 0.64 ns   |
| Camk2d        | calcium/calmodulin-dependent protein kinase II, delta                                                          | 108058 | 0.60  | 0.71  | 0.34  | 1.73 | 0.10 ns   |
| Lgals8        | lectin, galactose binding, soluble 8                                                                           | 56048  | 0.77  | 0.78  | 0.94  | 0.81 | -0.48 ns  |
| Cblc          | Casitas B-lineage lymphoma c                                                                                   | 80794  | 0.27  | 0.36  | 0.37  | 0.73 | -0.66 ns  |
| Ebag9         | estrogen receptor-binding fragment-associated gene 9                                                           | 55960  | 1.40  | 1.23  | 1.62  | 0.86 | -0.28 ns  |
| Smarca1       | SWI/SNF related, matrix associated, actin dependent regulator of chromatin, subfamily e, member 1              | 57376  | 1.44  | 1.29  | 1.61  | 0.89 | 0.03 ns   |
| Dgat2         | diacylglycerol O-acyltransferase 2                                                                             | 67800  | 0.28  | 0.41  | 0.64  | 0.44 | -0.78 ns  |
| Ctr9          | Ctr9, Paf1/RNA polymerase II complex component, homolog (S. cerevisiae)                                        | 22083  | 0.70  | 0.75  | 0.82  | 0.84 | -0.02 ns  |
| Exoc4         | exocyst complex component 4                                                                                    | 20336  | 1.52  | 1.41  | 1.33  | 1.14 | -0.21 ns  |
| Nras          | neuroblastoma ras oncogene                                                                                     | 18176  | 2.21  | 2.32  | 1.89  | 1.16 | 0.16 ns   |
| Sptlc1        | serine palmitoyltransferase, long chain base subunit 1                                                         | 268656 | 1.36  | 0.95  | 1.21  | 1.12 | 0.29 ns   |
| Sub1          | SUB1 homolog (S. cerevisiae)                                                                                   | 20024  | 5.70  | 5.72  | 6.31  | 0.90 | -0.02 ns  |
| Jarid2        | jumonji, AT rich interactive domain 2                                                                          | 16468  | 0.30  | 0.38  | 0.37  | 0.82 | -0.57 ns  |
| Jarid2        | jumonji, AT rich interactive domain 2                                                                          | 16468  | 0.57  | 0.68  | 0.61  | 0.93 | -0.29 ns  |
| Gyk           | glycerol kinase                                                                                                | 14933  | 0.46  | 0.46  | 0.67  | 0.68 | -0.81 *   |
| LOC676013     |                                                                                                                | 676013 | 1.30  | 1.46  | 1.47  | 0.88 | -0.30 ns  |
| Ube2i         | ubiquitin-conjugating enzyme E2I                                                                               | 22196  | 4.53  | 3.81  | 3.68  | 1.22 | 0.80 ns   |
| EG546265      |                                                                                                                | 546265 | 1.89  | 1.78  | 1.23  | 1.54 | 0.85 *    |
| LOC631286     |                                                                                                                | 631286 | 3.22  | 3.57  | 3.97  | 0.81 | -0.63 ns  |
| Ap3s2         | adaptor-related protein complex 3, sigma 2 subunit                                                             | 11778  | 0.32  | 0.38  | 0.41  | 0.77 | -0.66 ns  |
| Tnk1          | tyrosine kinase, non-receptor, 1                                                                               | 83813  | 0.87  | 0.76  | 0.92  | 0.93 | -0.60 ns  |
| Limd1         | LIM domains containing 1                                                                                       | 29806  | 1.40  | 1.48  | 1.24  | 1.12 | 0.81 ns   |
| Foxq1         | forkhead box Q1                                                                                                | 15220  | 0.68  | 0.65  | 0.70  | 0.98 | -0.37 ns  |
| Ncoa3         | nuclear receptor coactivator 3                                                                                 | 17979  | 0.27  | 0.31  | 0.37  | 0.72 | -0.94 **  |
| Hivep1        | human immunodeficiency virus type I enhancer binding protein 1                                                 | 110521 | 0.21  | 0.19  | 0.49  | 0.43 | -0.82 *   |
| Chek2         | CHK2 checkpoint homolog (S. pombe)                                                                             | 50883  | 0.54  | 0.56  | 0.61  | 0.87 | -0.35 ns  |
| Xpo6          | exportin 6                                                                                                     | 74204  | 0.50  | 0.56  | 0.62  | 0.79 | -0.43 ns  |
| Padi4         |                                                                                                                | 18602  | 0.34  | 0.46  | 0.51  | 0.66 | -0.39 ns  |
| Gipc1         | GIPC PDZ domain containing family, member 1                                                                    | 67903  | 1.19  | 1.24  | 1.49  | 0.79 | -0.35 ns  |
| Stau1         | stauferin (RNA binding protein) homolog 1 (Drosophila)                                                         | 20853  | 1.08  | 0.70  | 1.19  | 0.90 | -0.47 ns  |
| Bysl          | bystin-like                                                                                                    | 53414  | 0.46  | 0.50  | 0.36  | 1.27 | 0.37 ns   |
| Taf9          | TAF9 RNA polymerase II, TATA box binding protein (TBP)-associated factor                                       | 108143 | 2.53  | 3.34  | 3.94  | 0.64 | -0.81 ns  |
| Pxmp4         | peroxisomal membrane protein 4                                                                                 | 59038  | 0.38  | 0.34  | 0.42  | 0.89 | -0.19 ns  |
| Tlr3          | toll-like receptor 3                                                                                           | 142980 | 0.30  | 0.31  | 0.50  | 0.60 | -0.66 ns  |
| Rasa2         | RAS p21 protein activator 2                                                                                    | 114713 | 0.57  | 0.69  | 0.66  | 0.85 | -0.03 ns  |
| Pafah1b2      | platelet-activating factor acetylhydrolase, isoform 1b, alpha2 subunit                                         | 18475  | 1.26  | 1.00  | 1.11  | 1.13 | 0.65 ns   |
| Cul3          | cullin 3                                                                                                       | 26554  | 2.70  | 2.62  | 2.18  | 1.24 | 0.81 *    |
| Prep          | prolyl endopeptidase                                                                                           | 19072  | 1.16  | 0.99  | 0.98  | 1.17 | -0.11 ns  |

|           |                                                                                         |        |       |       |      |      |          |
|-----------|-----------------------------------------------------------------------------------------|--------|-------|-------|------|------|----------|
| Bat2      | HLA-B associated transcript 2                                                           | 53761  | 3.21  | 2.93  | 2.01 | 1.59 | 0.87 *   |
| Serpinb6b | serine (or cysteine) peptidase inhibitor, clade B, member 6b                            | 20708  | 0.16  | 0.06  | 0.77 | 0.20 | -0.47 ns |
| Ing3      | inhibitor of growth family, member 3                                                    | 71777  | 0.53  | 0.58  | 0.54 | 0.97 | 0.38 ns  |
| Arf5      | ADP-ribosylation factor 5                                                               | 11844  | 1.19  | 1.37  | 1.83 | 0.65 | -0.53 ns |
| Rims2     | regulating synaptic membrane exocytosis 2                                               | 116838 | 0.29  | 0.38  | 0.32 | 0.91 | -0.40 ns |
| Aspm      | asp (abnormal spindle)-like, microcephaly associated (Drosophila)                       | 12316  | 1.88  | 1.89  | 1.42 | 1.32 | 0.84 *   |
| Mrpl36    | mitochondrial ribosomal protein L36                                                     | 94066  | 0.48  | 0.60  | 0.89 | 0.54 | -0.78 ns |
| Scel      | sciellin                                                                                | 64929  | 6.81  | 4.99  | 3.17 | 2.14 | 0.83 *   |
| Wdr77     | WD repeat domain 77                                                                     | 70465  | 3.35  | 3.72  | 2.29 | 1.45 | 0.23 ns  |
| Prkcd     | protein kinase C, delta                                                                 | 18753  | 1.54  | 1.40  | 1.44 | 1.07 | 0.21 ns  |
| Pabpn1    | poly(A) binding protein, nuclear 1                                                      | 54196  | 7.18  | 7.50  | 6.93 | 1.03 | 0.65 ns  |
| Hmga2     | high mobility group AT-hook 2                                                           | 15364  | 1.54  | 0.78  | 0.66 | 2.30 | 0.60 ns  |
| Shc1      | src homology 2 domain-containing transforming protein C1                                | 20416  | 0.98  | 1.04  | 0.93 | 1.05 | -0.41 ns |
| Trip4     | thyroid hormone receptor interactor 4                                                   | 56404  | 0.67  | 0.48  | 0.36 | 1.84 | 0.98 *** |
| Runx1     | runt related transcription factor 1                                                     | 12394  | 0.27  | 0.19  | 0.15 | 1.82 | 0.05 ns  |
| Sypl      | synaptophysin-like protein                                                              | 19027  | 4.68  | 4.49  | 5.82 | 0.80 | -0.61 ns |
| Usp8      | ubiquitin specific peptidase 8                                                          | 84092  | 1.08  | 1.16  | 0.98 | 1.09 | 0.45 ns  |
| Snrpd3    | small nuclear ribonucleoprotein D3                                                      | 67332  | 4.28  | 3.93  | 3.84 | 1.11 | 0.13 ns  |
| Clk4      | CDC like kinase 4                                                                       | 12750  | 0.62  | 0.53  | 0.70 | 0.88 | -0.23 ns |
| Rnf5      | ring finger protein 5                                                                   | 54197  | 1.62  | 1.30  | 1.26 | 1.28 | 0.43 ns  |
| Vamp4     | vesicle-associated membrane protein 4                                                   | 53330  | 1.11  | 1.14  | 0.81 | 1.35 | 0.69 ns  |
| Hspb1     | heat shock protein 1                                                                    | 15507  | 2.64  | 2.40  | 8.01 | 0.33 | -0.39 ns |
| Diap3     | diaphanous homolog 3 (Drosophila)                                                       | 56419  | 0.61  | 0.57  | 0.71 | 0.86 | 0.25 ns  |
| Dnmt1     | DNA methyltransferase (cytosine-5) 1                                                    | 13433  | 3.84  | 3.54  | 3.49 | 1.10 | 0.69 ns  |
| Hist1h4a  |                                                                                         | 326619 | 0.38  | 0.27  | 0.38 | 0.98 | 0.35 ns  |
| Hist1h4b  |                                                                                         | 326620 | 0.38  | 0.27  | 0.38 | 0.98 | 0.35 ns  |
| Hist1h4c  |                                                                                         | 319155 | 0.38  | 0.27  | 0.38 | 0.98 | 0.35 ns  |
| Hist1h4d  |                                                                                         | 69386  | 0.38  | 0.27  | 0.38 | 0.98 | 0.35 ns  |
| Hist1h4i  |                                                                                         | 319158 | 0.38  | 0.27  | 0.38 | 0.98 | 0.35 ns  |
| Hist1h4j  |                                                                                         | 319159 | 0.38  | 0.27  | 0.38 | 0.98 | 0.35 ns  |
| Hist1h4k  |                                                                                         | 319160 | 0.38  | 0.27  | 0.38 | 0.98 | 0.35 ns  |
| Hist1h4m  |                                                                                         | 319161 | 0.38  | 0.27  | 0.38 | 0.98 | 0.35 ns  |
| Itgb6     | integrin beta 6                                                                         | 16420  | 0.26  | 0.36  | 0.33 | 0.80 | -0.05 ns |
| Met       | met proto-oncogene                                                                      | 17295  | 0.50  | 0.40  | 0.34 | 1.47 | 0.14 ns  |
| Refbp2    |                                                                                         | 56009  | 3.36  | 3.39  | 3.76 | 0.89 | 0.22 ns  |
| Glrx2     | glutaredoxin 2 (thioltransferase)                                                       | 69367  | 0.96  | 0.90  | 0.71 | 1.35 | -0.01 ns |
| Espn      | espin                                                                                   | 56226  | 0.14  | 0.35  | 0.45 | 0.31 | -0.66 ns |
| Ins3      |                                                                                         | 16336  | 0.44  | 0.39  | 0.32 | 1.37 | 0.66 ns  |
| Jak3      |                                                                                         | 16453  | 0.44  | 0.39  | 0.32 | 1.37 | 0.66 ns  |
| Schp1     | schwannomin interacting protein 1                                                       | 30953  | 1.23  | 1.35  | 1.25 | 0.98 | 0.42 ns  |
| LOC675857 |                                                                                         | 675857 | 4.35  | 4.46  | 5.78 | 0.75 | -0.69 ns |
| Vcp       |                                                                                         | 269523 | 4.35  | 4.46  | 5.78 | 0.75 | -0.69 ns |
| Maea      | macrophage erythroblast attacher                                                        | 59003  | 1.43  | 1.50  | 1.41 | 1.01 | 0.15 ns  |
| Bzw1      | basic leucine zipper and W2 domains 1                                                   | 66882  | 1.56  | 1.58  | 1.51 | 1.02 | -0.30 ns |
| Bzw1      | basic leucine zipper and W2 domains 1                                                   | 66882  | 4.14  | 3.79  | 2.88 | 1.43 | 0.40 ns  |
| Ddx3x     | DEAD/H (Asp-Glu-Ala-Asp/His) box polypeptide 3, X-linked                                | 13205  | 5.79  | 6.72  | 7.21 | 0.80 | -0.10 ns |
| Prosc     | proline synthetase co-transcribed                                                       | 114863 | 0.72  | 0.83  | 0.75 | 0.96 | 0.34 ns  |
| Ncbp2     | nuclear cap binding protein subunit 2                                                   | 68092  | 2.84  | 2.74  | 2.56 | 1.11 | 0.34 ns  |
| Tollip    | toll interacting protein                                                                | 54473  | 0.84  | 0.76  | 0.80 | 1.05 | 0.44 ns  |
| Arf4      | ADP-ribosylation factor 4                                                               | 11843  | 4.32  | 3.96  | 3.87 | 1.11 | 0.47 ns  |
| Capza2    | capping protein (actin filament) muscle Z-line, alpha 2                                 | 12343  | 5.09  | 5.12  | 5.20 | 0.97 | 0.17 ns  |
| Ptk2      | PTK2 protein tyrosine kinase 2                                                          | 14083  | 1.89  | 1.84  | 2.17 | 0.87 | -0.83 *  |
| Pa2g4     | proliferation-associated 2G4                                                            | 18813  | 2.67  | 2.46  | 1.93 | 1.37 | 0.38 ns  |
| Dnmt3a    | DNA methyltransferase 3A                                                                | 13435  | 0.84  | 0.92  | 1.46 | 0.57 | -0.78 ns |
| Cdk5rap3  | CDK5 regulatory subunit associated protein 3                                            | 80280  | 0.90  | 0.97  | 1.10 | 0.81 | -0.38 ns |
| Ift172    | intraflagellar transport 172 homolog (Chlamydomonas)                                    | 67661  | 0.52  | 0.56  | 0.91 | 0.56 | -0.76 ns |
| Adnp      | activity-dependent neuroprotective protein                                              | 11538  | 5.62  | 5.24  | 5.36 | 1.04 | -0.31 ns |
| EG270335  |                                                                                         | 270335 | 0.76  | 0.69  | 0.31 | 2.44 | 0.27 ns  |
| EG622782  |                                                                                         | 622782 | 0.76  | 0.69  | 0.31 | 2.44 | 0.27 ns  |
| EG666200  |                                                                                         | 666200 | 0.76  | 0.69  | 0.31 | 2.44 | 0.27 ns  |
| EG666464  |                                                                                         | 666464 | 0.76  | 0.69  | 0.31 | 2.44 | 0.27 ns  |
| LOC544983 |                                                                                         | 544983 | 0.76  | 0.69  | 0.31 | 2.44 | 0.27 ns  |
| LOC545175 |                                                                                         | 545175 | 0.76  | 0.69  | 0.31 | 2.44 | 0.27 ns  |
| LOC619711 |                                                                                         | 619711 | 0.76  | 0.69  | 0.31 | 2.44 | 0.27 ns  |
| LOC624831 |                                                                                         | 624831 | 0.76  | 0.69  | 0.31 | 2.44 | 0.27 ns  |
| Lman2     | lectin, mannose-binding 2                                                               | 66890  | 0.57  | 0.60  | 0.66 | 0.86 | -0.95 ** |
| Snx9      | sorting nexin 9                                                                         | 66616  | 1.21  | 1.14  | 0.79 | 1.53 | 0.52 ns  |
| Sc4mol    | sterol-C4-methyl oxidase-like                                                           | 66234  | 3.32  | 3.28  | 3.86 | 0.85 | -0.71 ns |
| LOC546321 |                                                                                         | 546321 | 12.32 | 11.07 | 8.97 | 1.37 | 0.88 *   |
| Tomm20    |                                                                                         | 67952  | 12.32 | 11.07 | 8.97 | 1.37 | 0.88 *   |
| Rab33b    | RAB33B, member of RAS oncogene family                                                   | 19338  | 1.58  | 1.39  | 0.88 | 1.78 | 0.94 **  |
| Tmod3     | tropomodulin 3                                                                          | 50875  | 1.14  | 0.93  | 1.28 | 0.89 | 0.05 ns  |
| Sec61g    | SEC61, gamma subunit                                                                    | 20335  | 3.71  | 3.50  | 4.19 | 0.88 | -0.10 ns |
| Crbn      | cereblon                                                                                | 58799  | 0.91  | 0.81  | 1.05 | 0.86 | -0.49 ns |
| Capn7     | calpain 7                                                                               | 12339  | 1.61  | 1.64  | 1.62 | 0.99 | -0.30 ns |
| Mettl3    | methyltransferase-like 3                                                                | 56335  | 0.79  | 0.77  | 0.76 | 1.03 | 0.03 ns  |
| Fos       | FBJ osteosarcoma oncogene                                                               | 14281  | 1.21  | 1.49  | 1.39 | 0.87 | -0.59 ns |
| Paqr4     | progesterin and adipoQ receptor family member IV                                        | 76498  | 0.77  | 0.73  | 0.37 | 2.06 | 0.69 ns  |
| Rnf10     | ring finger protein 10                                                                  | 50849  | 1.74  | 1.54  | 2.13 | 0.81 | -0.68 ns |
| Rfx5      | regulatory factor X, 5 (influences HLA class II expression)                             | 53970  | 0.48  | 0.45  | 0.39 | 1.22 | 0.86 *   |
| Irs1      | insulin receptor substrate 1                                                            | 16367  | 1.51  | 1.12  | 0.84 | 1.78 | 0.06 ns  |
| Yeats4    | YEATS domain containing 4                                                               | 64050  | 1.65  | 1.37  | 1.15 | 1.42 | 0.53 ns  |
| Ube2b     | ubiquitin-conjugating enzyme E2B, RAD6 homology (S. cerevisiae)                         | 22210  | 3.15  | 2.99  | 3.62 | 0.87 | -0.57 ns |
| Slc25a20  | solute carrier family 25 (mitochondrial carnitine/acylcarnitine translocase), member 20 | 57279  | 1.11  | 1.12  | 1.32 | 0.84 | -0.16 ns |
| Atp5a1    | ATP synthase, H+ transporting, mitochondrial F1 complex, alpha subunit, isoform 1       | 11946  | 6.37  | 6.20  | 6.34 | 1.00 | 0.45 ns  |



|               |                                                                                    |        |       |      |      |      |          |
|---------------|------------------------------------------------------------------------------------|--------|-------|------|------|------|----------|
| Dom3z         | DOM-3 homolog Z (C. elegans)                                                       | 112403 | 0.60  | 0.56 | 0.44 | 1.35 | 0.86 *   |
| 1200014J11Rik | RIKEN cDNA 1200014J11 gene                                                         | 66874  | 0.69  | 0.64 | 0.80 | 0.86 | -0.16 ns |
| Rshl2a        |                                                                                    | 66832  | 1.91  | 1.82 | 1.42 | 1.34 | 0.96 **  |
| Rshl2b        |                                                                                    | #####  | 1.91  | 1.82 | 1.42 | 1.34 | 0.96 **  |
| Avp1          | arginine vasopressin-induced 1                                                     | 69534  | 1.10  | 1.20 | 1.30 | 0.85 | -0.76 ns |
| Atp1b3        | ATPase, Na <sup>+</sup> /K <sup>+</sup> transporting, beta 3 polypeptide           | 11933  | 2.51  | 2.26 | 2.14 | 1.17 | 0.75 ns  |
| Impa1         | inositol (myo)-1 (or 4)-monophosphatase 1                                          | 55980  | 2.03  | 2.26 | 1.88 | 1.08 | -0.22 ns |
| Aip           | aryl-hydrocarbon receptor-interacting protein                                      | 11632  | 1.40  | 1.43 | 1.18 | 1.18 | 0.84 *   |
| Shoc2         | soc-2 (suppressor of clear) homolog (C. elegans)                                   | 56392  | 2.58  | 2.01 | 1.73 | 1.48 | 0.82 *   |
| Sfrs5         | splicing factor, arginine/serine-rich 5 (SRp40, HRS)                               | 20384  | 10.19 | 8.01 | 8.63 | 1.17 | 0.55 ns  |
| 5730427N09Rik |                                                                                    | 59050  | 2.32  | 3.07 | 3.32 | 0.70 | -0.75 ns |
| EG433230      |                                                                                    | 433230 | 2.32  | 3.07 | 3.32 | 0.70 | -0.75 ns |
| LOC636306     |                                                                                    | 636306 | 2.32  | 3.07 | 3.32 | 0.70 | -0.75 ns |
| Rala          | v-ral simian leukemia viral oncogene homolog A (ras related)                       | 56044  | 1.48  | 1.55 | 2.11 | 0.70 | -0.40 ns |
| Skp1a         | S-phase kinase-associated protein 1A                                               | 21402  | 6.44  | 5.85 | 6.59 | 0.97 | -0.07 ns |
| Dnajb11       | DnaJ (Hsp40) homolog, subfamily B, member 11                                       | 67838  | 1.38  | 1.42 | 1.70 | 0.81 | -0.44 ns |
| Vapb          | vesicle-associated membrane protein, associated protein B and C                    | 56491  | 2.42  | 2.24 | 2.27 | 1.06 | -0.32 ns |
| Gnpnat1       | glucosamine-phosphate N-acetyltransferase 1                                        | 54342  | 0.61  | 0.73 | 0.83 | 0.74 | -0.86 *  |
| Dld           | dihydropyrimidine dehydrogenase                                                    | 13382  | 1.23  | 1.23 | 1.59 | 0.77 | -0.53 ns |
| Spred1        | sprouty protein with EVH-1 domain 1, related sequence                              | 114715 | 0.40  | 0.46 | 0.47 | 0.83 | -0.22 ns |
| Bat4          | HLA-B associated transcript 4                                                      | 81845  | 0.47  | 0.40 | 0.37 | 1.27 | 0.89 *   |
| Mta2          | metastasis-associated gene family, member 2                                        | 23942  | 1.94  | 1.60 | 1.37 | 1.41 | 0.85 *   |
| Pard6b        | par-6 (partitioning defective 6) homolog beta (C. elegans)                         | 58220  | 1.98  | 1.88 | 1.98 | 0.99 | -0.56 ns |
| Tob1          | transducer of ErbB-2.1                                                             | 22057  | 1.43  | 1.30 | 3.03 | 0.47 | -0.67 ns |
| Abi1          | abl-interactor 1                                                                   | 11308  | 2.01  | 1.85 | 1.50 | 1.33 | 0.46 ns  |
| Gabarap2      | gamma-aminobutyric acid (GABA-A) receptor-associated protein-like 2                | 93739  | 2.23  | 1.97 | 1.74 | 1.27 | 0.97 **  |
| 6720456B07Rik | RIKEN cDNA 6720456B07 gene                                                         | 101314 | 3.42  | 3.51 | 4.68 | 0.73 | -0.67 ns |
| Fnbp4         | formin binding protein 4                                                           | 55935  | 1.03  | 0.79 | 0.68 | 1.50 | 0.40 ns  |
| Pspc1         | paraspeckle protein 1                                                              | 66645  | 2.14  | 2.32 | 1.16 | 1.84 | 0.59 ns  |
| Hiat1         | hippocampus abundant gene transcript 1                                             | 15247  | 1.94  | 1.98 | 1.90 | 1.02 | -0.44 ns |
| Ncor1         | nuclear receptor co-repressor 1                                                    | 20185  | 2.71  | 2.64 | 2.68 | 1.01 | -0.06 ns |
| Tm9sf4        | transmembrane 9 superfamily protein member 4                                       | 99237  | 0.67  | 0.58 | 0.73 | 0.91 | -0.27 ns |
| 2310003F16Rik | RIKEN cDNA 2310003F16 gene                                                         | 67693  | 2.18  | 1.80 | 1.81 | 1.19 | 0.53 ns  |
| Tmem167       | transmembrane protein 167                                                          | 66074  | 0.34  | 0.44 | 0.59 | 0.58 | -0.85 *  |
| Nola3         | nucleolar protein family A, member 3                                               | 66181  | 5.38  | 4.36 | 4.34 | 1.23 | 0.71 ns  |
| Phc1          | polyhomeotic-like 1 (Drosophila)                                                   | 13619  | 1.00  | 1.18 | 1.39 | 0.71 | -0.85 *  |
| Spcs2         | signal peptidase complex subunit 2 homolog (S. cerevisiae)                         | 66624  | 2.35  | 2.33 | 2.44 | 0.96 | 0.21 ns  |
| 2510049I19Rik | RIKEN cDNA 2510049I19 gene                                                         | 67922  | 1.62  | 1.75 | 1.58 | 1.02 | 0.58 ns  |
| Mrpl49        | mitochondrial ribosomal protein L49                                                | 18120  | 1.54  | 1.38 | 0.98 | 1.56 | 0.81 *   |
| Prdx6         | peroxiredoxin 6                                                                    | 11758  | 3.11  | 2.60 | 1.84 | 1.68 | 0.33 ns  |
| Inpp5e        | inositol polyphosphate-5-phosphatase E                                             | 64436  | 0.42  | 0.31 | 0.21 | 1.95 | 0.48 ns  |
| Psmd5         | proteasome (prosome, macropain) 26S subunit, non-ATPase, 5                         | 66998  | 1.66  | 1.43 | 1.14 | 1.44 | 0.75 ns  |
| Ap3b1         | adaptor-related protein complex 3, beta 1 subunit                                  | 11774  | 1.64  | 1.91 | 2.24 | 0.73 | -0.75 ns |
| Galnt1        | UDP-N-acetyl-alpha-D-galactosamine:polypeptide N-acetylgalactosaminyltransferase 1 | 14423  | 0.50  | 0.62 | 0.82 | 0.61 | -0.59 ns |
| Tfdp1         |                                                                                    | 21781  | 2.97  | 3.24 | 4.26 | 0.69 | -0.70 ns |
| Mrps36        | mitochondrial ribosomal protein S36                                                | 66128  | 0.56  | 0.70 | 0.96 | 0.58 | -0.88 *  |
| Cops7a        | COP9 (constitutive photomorphogenic) homolog, subunit 7a (Arabidopsis thaliana)    | 26894  | 1.00  | 1.03 | 1.09 | 0.91 | -0.64 ns |
| Txndc4        | thioredoxin domain containing 4 (endoplasmic reticulum)                            | 76299  | 1.07  | 1.06 | 1.40 | 0.76 | -0.54 ns |
| Nktr          | natural killer tumor recognition sequence                                          | 18087  | 1.04  | 0.99 | 0.99 | 1.05 | 0.37 ns  |
| Luc7l2        | LUC7-like 2 (S. cerevisiae)                                                        | 192196 | 3.66  | 4.09 | 3.54 | 1.03 | 0.11 ns  |
| Atp6v1g1      |                                                                                    | 66290  | 4.05  | 4.46 | 5.90 | 0.68 | -0.78 ns |
| EG623365      |                                                                                    | 623365 | 8.78  | 8.75 | 7.56 | 1.16 | 0.03 ns  |
| LOC633468     |                                                                                    | 633468 | 8.78  | 8.75 | 7.56 | 1.16 | 0.03 ns  |
| Bop1          | block of proliferation 1                                                           | 12181  | 0.94  | 0.92 | 1.09 | 0.85 | -0.25 ns |
| Minpp1        | multiple inositol polyphosphate histidine phosphatase 1                            | 17330  | 1.85  | 1.70 | 1.27 | 1.45 | 0.71 ns  |
| Nedd4l        | neural precursor cell expressed, developmentally down-regulated gene 4-like        | 83814  | 1.89  | 1.75 | 1.57 | 1.19 | 0.37 ns  |
| Polg          | polymerase (DNA directed), gamma                                                   | 18975  | 0.65  | 0.51 | 0.71 | 0.91 | -0.23 ns |
| Ints6         | integrator complex subunit 6                                                       | 18130  | 1.39  | 1.51 | 0.94 | 1.47 | 0.19 ns  |
| Ptprk         | protein tyrosine phosphatase, receptor type, K                                     | 19272  | 1.70  | 1.20 | 0.92 | 1.84 | 0.48 ns  |
| Pitpna        | phosphatidylinositol transfer protein, alpha                                       | 18738  | 2.12  | 2.37 | 1.88 | 1.12 | 0.13 ns  |
| 1810029B16Rik | RIKEN cDNA 1810029B16 gene                                                         | 66282  | 0.38  | 0.40 | 0.40 | 0.95 | 0.27 ns  |
| Hyou1         | hypoxia up-regulated 1                                                             | 12282  | 1.18  | 1.27 | 1.08 | 1.09 | 0.66 ns  |
| Psmd8         | proteasome (prosome, macropain) 26S subunit, non-ATPase, 8                         | 57296  | 2.34  | 2.44 | 3.41 | 0.68 | -0.55 ns |
| Add3          | adducin 3 (gamma)                                                                  | 27360  | 0.36  | 0.50 | 0.31 | 1.16 | -0.34 ns |
| Copb1         | coatamer protein complex, subunit beta 1                                           | 70349  | 1.22  | 1.19 | 1.47 | 0.83 | -0.53 ns |
| Paxip1        | PAX interacting (with transcription-activation domain) protein 1                   | 55982  | 1.17  | 1.35 | 1.46 | 0.80 | -0.39 ns |
| Rnf111        | ring finger 111                                                                    | 93836  | 1.32  | 0.85 | 0.97 | 1.35 | 0.73 ns  |
| 2010002N04Rik | RIKEN cDNA 2010002N04 gene                                                         | 106878 | 0.60  | 0.59 | 0.53 | 1.13 | 0.62 ns  |
| Tgolin2       |                                                                                    | 22135  | 0.50  | 0.58 | 0.79 | 0.62 | -0.68 ns |
| Tgolin1       | trans-golgi network protein                                                        | 22134  | 2.48  | 2.68 | 2.57 | 0.96 | -0.09 ns |
| Tpbp          | trophoblast glycoprotein                                                           | 21983  | 0.66  | 0.62 | 0.48 | 1.37 | 0.85 *   |
| Tmem39a       | transmembrane protein 39a                                                          | 67846  | 0.59  | 0.68 | 0.81 | 0.72 | -0.57 ns |
| 3110001D03Rik | RIKEN cDNA 3110001D03 gene                                                         | 66928  | 0.70  | 0.65 | 0.89 | 0.78 | -0.53 ns |
| Tacstd2       | tumor-associated calcium signal transducer 2                                       | 56753  | 2.13  | 2.70 | 3.04 | 0.70 | -0.85 *  |
| Pnn           | pinin                                                                              | 18949  | 1.85  | 2.19 | 3.28 | 0.56 | -0.84 *  |
| Sdcbp         | syndecan binding protein                                                           | 53378  | 5.88  | 5.25 | 5.97 | 0.98 | -0.22 ns |
| 1110004F10Rik | RIKEN cDNA 1110004F10 gene                                                         | 56372  | 1.28  | 1.34 | 1.53 | 0.83 | -0.69 ns |
| Degs1         | degenerative spermatocyte homolog 1 (Drosophila)                                   | 13244  | 1.60  | 1.83 | 1.84 | 0.87 | -0.80 ns |
| Sec23a        | SEC23A (S. cerevisiae)                                                             | 20334  | 1.34  | 1.36 | 1.76 | 0.76 | -0.42 ns |
| Socs5         | suppressor of cytokine signaling 5                                                 | 56468  | 0.88  | 0.79 | 0.67 | 1.31 | 0.88 *   |
| Mrpl1         | mitochondrial ribosomal protein L1                                                 | 94061  | 0.41  | 0.41 | 0.26 | 1.57 | 0.77 ns  |
| Snap29        | synaptosomal-associated protein                                                    | 67474  | 0.33  | 0.36 | 0.43 | 0.76 | -0.73 ns |
| Sort1         | sortilin 1                                                                         | 20661  | 0.76  | 0.85 | 0.11 | 6.68 | 0.00 ns  |
| Aktip         | thymoma viral proto-oncogene 1 interacting protein                                 | 14339  | 1.95  | 2.25 | 2.44 | 0.79 | -0.88 *  |

|               |                                                                                                       |        |       |       |       |      |          |
|---------------|-------------------------------------------------------------------------------------------------------|--------|-------|-------|-------|------|----------|
| Cacna1g       | calcium channel, voltage-dependent, T type, alpha 1G subunit                                          | 12291  | 0.33  | 0.32  | 0.12  | 2.66 | 0.56 ns  |
| Wnt7a         | wingless-related MMTV integration site 7A                                                             | 22421  | 0.71  | 0.73  | 0.70  | 1.01 | 0.32 ns  |
| Laptm4a       | lysosomal-associated protein transmembrane 4A                                                         | 17775  | 8.04  | 6.65  | 8.27  | 0.97 | -0.45 ns |
| Fmr1          | fragile X mental retardation syndrome 1 homolog                                                       | 14265  | 2.52  | 2.14  | 2.75  | 0.91 | 0.06 ns  |
| Csnk1g2       | casein kinase 1, gamma 2                                                                              | 103236 | 1.73  | 1.37  | 1.39  | 1.24 | 0.53 ns  |
| Pole4         | polymerase (DNA-directed), epsilon 4 (p12 subunit)                                                    | 66979  | 0.75  | 0.88  | 1.15  | 0.65 | -0.53 ns |
| Rpp30         | ribonuclease P/MRP 30 subunit (human)                                                                 | 54364  | 1.86  | 1.87  | 1.42  | 1.30 | 0.88 *   |
| Ncoa6         | nuclear receptor coactivator 6                                                                        | 56406  | 1.83  | 1.70  | 2.07  | 0.88 | -0.56 ns |
| Osbpl9        | oxysterol binding protein-like 9                                                                      | 100273 | 1.82  | 1.68  | 1.90  | 0.95 | -0.66 ns |
| Actr8         | ARP8 actin-related protein 8 homolog (S. cerevisiae)                                                  | 56249  | 0.80  | 0.78  | 0.95  | 0.84 | -0.27 ns |
| Psmc9         | proteasome (prosome, macropain) 26S subunit, non-ATPase, 9                                            | 67151  | 0.65  | 0.67  | 0.66  | 0.98 | 0.07 ns  |
| Smad7         | MAD homolog 7 (Drosophila)                                                                            | 17131  | 0.39  | 0.46  | 0.37  | 1.04 | 0.35 ns  |
| Siah1a        | seven in absentia 1A                                                                                  | 20437  | 0.87  | 0.99  | 0.99  | 0.87 | 0.30 ns  |
| Git2          | G protein-coupled receptor kinase-interactor 2                                                        | 26431  | 1.04  | 0.93  | 1.01  | 1.03 | 0.30 ns  |
| Tsnax         | translin-associated factor X                                                                          | 53424  | 1.70  | 1.64  | 1.02  | 1.66 | 0.89 *   |
| Taf12         | TAF12 RNA polymerase II, TATA box binding protein (TBP)-associated factor                             | 66464  | 0.41  | 0.41  | 0.44  | 0.91 | -0.68 ns |
| Fbln2         | fibulin 2                                                                                             | 14115  | 0.70  | 0.58  | 1.57  | 0.45 | -0.15 ns |
| 250003M10Rik  | RIKEN cDNA 250003M10 gene                                                                             | 66511  | 3.34  | 4.12  | 3.18  | 1.04 | 0.20 ns  |
| Fdps          | farnesyl diphosphate synthetase                                                                       | 110196 | 6.29  | 5.95  | 8.18  | 0.76 | -0.63 ns |
| Pdia3         | protein disulfide isomerase associated 3                                                              | 14827  | 4.86  | 3.81  | 3.98  | 1.22 | 0.25 ns  |
| 1300012G16Rik | RIKEN cDNA 1300012G16 gene                                                                            | 71772  | 0.29  | 0.45  | 0.48  | 0.61 | -0.78 ns |
| Mybbp1a       | MYB binding protein (P160) 1a                                                                         | 18432  | 2.81  | 2.85  | 2.75  | 1.02 | 0.48 ns  |
| Gsta3         | glutathione S-transferase, alpha 3                                                                    | 14859  | 1.14  | 0.78  | 0.15  | 7.77 | 0.29 ns  |
| 1110001A07Rik | RIKEN cDNA 1110001A07 gene                                                                            | 66140  | 1.00  | 0.94  | 0.96  | 1.03 | -0.25 ns |
| Tfb2m         | transcription factor B2, mitochondrial                                                                | 15278  | 0.77  | 0.60  | 0.48  | 1.61 | 0.37 ns  |
| Fbxw2         | F-box and WD-40 domain protein 2                                                                      | 30050  | 0.55  | 0.45  | 0.46  | 1.18 | 0.62 ns  |
| Rock1         | Rho-associated coiled-coil containing protein kinase 1                                                | 19877  | 1.90  | 2.16  | 2.17  | 0.88 | -0.14 ns |
| Dapk3         | death-associated kinase 3                                                                             | 13144  | 0.86  | 0.66  | 0.77  | 1.11 | 0.09 ns  |
| Clpx          | caseinolytic peptidase X (E.coli)                                                                     | 270166 | 0.56  | 0.52  | 0.60  | 0.93 | 0.20 ns  |
| Rab11b        |                                                                                                       | 19326  | 2.68  | 2.00  | 1.98  | 1.35 | 0.81 *   |
| Actn4         | actinin alpha 4                                                                                       | 60595  | 3.87  | 4.14  | 4.30  | 0.90 | -0.74 ns |
| Hs3st1        | heparan sulfate (glucosamine) 3-O-sulfotransferase 1                                                  | 15476  | 0.29  | 0.40  | 0.50  | 0.57 | -0.94 ** |
| Pgrmc1        | progesterone receptor membrane component 1                                                            | 53328  | 3.80  | 3.82  | 4.84  | 0.78 | -0.61 ns |
| Stk17b        | serine/threonine kinase 17b (apoptosis-inducing)                                                      | 98267  | 0.74  | 0.66  | 0.44  | 1.65 | 0.97 **  |
| Nol12         | nucleolar protein 12                                                                                  | 97961  | 1.20  | 1.14  | 1.32  | 0.91 | -0.17 ns |
| Ptma          | prothymosin alpha                                                                                     | 19231  | 20.50 | 19.99 | 17.18 | 1.19 | 0.74 ns  |
| Bzw2          | basic leucine zipper and W2 domains 2                                                                 | 66912  | 0.94  | 0.92  | 0.74  | 1.27 | 0.16 ns  |
| Cops2         | COP9 (constitutive photomorphogenic) homolog, subunit 2 (Arabidopsis thaliana)                        | 12848  | 2.38  | 1.72  | 1.79  | 1.32 | 0.63 ns  |
| Ubl3          | ubiquitin-like 3                                                                                      | 24109  | 2.37  | 1.91  | 2.09  | 1.13 | -0.09 ns |
| Map3k7ip2     | mitogen-activated protein kinase kinase kinase 7 interacting protein 2                                | 68652  | 3.81  | 3.10  | 3.06  | 1.24 | 0.23 ns  |
| Frrs1         |                                                                                                       | 20321  | 1.50  | 1.84  | 1.21  | 1.24 | 0.13 ns  |
| Sept2         | septin 2                                                                                              | 18000  | 3.07  | 2.80  | 2.03  | 1.50 | 0.86 *   |
| Top1          | topoisomerase (DNA) I                                                                                 | 21969  | 3.94  | 4.14  | 3.93  | 1.00 | -0.51 ns |
| Nol11         | nucleolar protein 11                                                                                  | 68979  | 1.17  | 1.11  | 1.22  | 0.95 | 0.33 ns  |
| Cript         | cysteine-rich PDZ-binding protein                                                                     | 56724  | 3.05  | 2.42  | 2.07  | 1.47 | 0.96 **  |
| Fbxo3         | F-box protein 3                                                                                       | 57443  | 1.24  | 0.77  | 0.64  | 1.93 | 0.77 ns  |
| Mrp145        | mitochondrial ribosomal protein L45                                                                   | 67036  | 1.48  | 1.17  | 1.37  | 1.08 | -0.05 ns |
| Decr2         | 2-4-dienoyl-Coenzyme A reductase 2, peroxisomal                                                       | 26378  | 0.39  | 0.33  | 0.25  | 1.55 | 0.58 ns  |
| Max           | Max protein                                                                                           | 17187  | 0.30  | 0.29  | 0.41  | 0.73 | -0.73 ns |
| Sirt2         | sirtuin 2 (silent mating type information regulation 2, homolog) 2 (S. cerevisiae)                    | 64383  | 0.66  | 0.58  | 0.69  | 0.95 | -0.28 ns |
| Myst4         | MYST histone acetyltransferase monocytic leukemia 4                                                   | 54169  | 0.49  | 0.49  | 0.39  | 1.24 | 0.20 ns  |
| Asf1a         | ASF1 anti-silencing function 1 homolog A (S. cerevisiae)                                              | 66403  | 2.48  | 2.17  | 1.46  | 1.69 | 0.64 ns  |
| AW209491      | expressed sequence AW209491                                                                           | 105351 | 0.75  | 0.72  | 0.68  | 1.10 | 0.35 ns  |
| Csk           | c-src tyrosine kinase                                                                                 | 12988  | 0.95  | 0.85  | 0.77  | 1.24 | 0.81 *   |
| Lmnb1         | lamin B1                                                                                              | 16906  | 1.45  | 1.57  | 1.73  | 0.83 | 0.15 ns  |
| LOC639633     |                                                                                                       | 639633 | 1.37  | 1.54  | 0.87  | 1.57 | 0.63 ns  |
| Npm3          |                                                                                                       | 18150  | 1.37  | 1.54  | 0.87  | 1.57 | 0.63 ns  |
| Mastl         | microtubule associated serine/threonine kinase-like                                                   | 67121  | 0.51  | 0.46  | 0.49  | 1.03 | -0.21 ns |
| Rnf44         | ring finger protein 44                                                                                | 105239 | 2.36  | 1.88  | 1.98  | 1.19 | 0.55 ns  |
| Rhot1         | ras homolog gene family, member T1                                                                    | 59040  | 1.48  | 1.50  | 1.25  | 1.17 | 0.18 ns  |
| Pdcd2         | programmed cell death 2                                                                               | 18567  | 0.87  | 0.76  | 0.47  | 1.83 | 0.67 ns  |
| Strn3         | striatin, calmodulin binding protein 3                                                                | 94186  | 4.03  | 4.07  | 4.57  | 0.88 | -0.53 ns |
| Pms2          | postmeiotic segregation increased 2 (S. cerevisiae)                                                   | 18861  | 0.77  | 0.69  | 0.64  | 1.20 | 0.87 *   |
| Ergic3        | ERGIC and golgi 3                                                                                     | 66366  | 2.41  | 2.28  | 2.86  | 0.84 | -0.56 ns |
| Leprotl1      | leptin receptor overlapping transcript-like 1                                                         | 68192  | 0.84  | 0.91  | 1.20  | 0.70 | -0.29 ns |
| Ifngr2        | interferon gamma receptor 2                                                                           | 15980  | 0.30  | 0.34  | 0.92  | 0.33 | -0.76 ns |
| Paics         | phosphoribosylaminoimidazole carboxylase, phosphoribosylaminoimidazole, succinocarboxamide synthetase | 67054  | 9.82  | 10.23 | 8.99  | 1.09 | -0.13 ns |
| Psmc7         | proteasome (prosome, macropain) subunit, alpha type 7                                                 | 26444  | 2.38  | 2.51  | 2.86  | 0.83 | -0.72 ns |
| Bcl2l2        | Bcl2-like 2                                                                                           | 12050  | 0.44  | 0.46  | 0.67  | 0.66 | -0.81 ns |
| Wbscr22       | Williams Beuren syndrome chromosome region 22                                                         | 66138  | 0.92  | 0.96  | 0.91  | 1.01 | 0.14 ns  |
| Ankr32        | ankyrin repeat domain 32                                                                              | 105377 | 0.46  | 0.60  | 0.77  | 0.60 | -0.75 ns |
| Igfbp7        | insulin-like growth factor binding protein 7                                                          | 29817  | 6.45  | 6.24  | 6.63  | 0.97 | 0.33 ns  |
| Axl           | AXL receptor tyrosine kinase                                                                          | 26362  | 0.47  | 0.44  | 0.48  | 0.98 | 0.43 ns  |
| Arpc4         | actin related protein 2/3 complex, subunit 4                                                          | 68089  | 2.66  | 2.23  | 2.93  | 0.90 | -0.53 ns |
| Fgfr1op2      | FGFR1 oncogene partner 2                                                                              | 67529  | 3.12  | 2.71  | 2.86  | 1.08 | 0.60 ns  |
| Rock2         | Rho-associated coiled-coil containing protein kinase 2                                                | 19878  | 1.33  | 1.49  | 1.36  | 0.97 | 0.27 ns  |
| Mdm2          | transformed mouse 3T3 cell double minute 2                                                            | 17246  | 0.75  | 0.89  | 1.04  | 0.72 | -0.78 ns |
| Mgat1         | mannoside acetylglucosaminyltransferase 1                                                             | 17308  | 0.47  | 0.56  | 0.64  | 0.72 | -0.77 ns |
| Clp1          | CLP1, cleavage and polyadenylation factor I subunit, homolog (S. cerevisiae)                          | 98985  | 0.41  | 0.30  | 0.39  | 1.05 | -0.24 ns |
| Ssfa2         | sperm specific antigen 2                                                                              | 70599  | 0.46  | 0.44  | 0.42  | 1.10 | -0.34 ns |
| Tarbp2        | TAR (HIV) RNA binding protein 2                                                                       | 21357  | 0.62  | 0.58  | 0.54  | 1.15 | 0.63 ns  |

|               |                                                                                  |        |       |       |       |      |          |
|---------------|----------------------------------------------------------------------------------|--------|-------|-------|-------|------|----------|
| Cenpq         | centromere protein Q                                                             | 83815  | 1.03  | 0.97  | 0.73  | 1.40 | 0.76 ns  |
| Slc33a1       | solute carrier family 33 (acetyl-CoA transporter), member 1                      | 11416  | 0.71  | 0.92  | 0.76  | 0.93 | -0.50 ns |
| Ccnl1         | cyclin L1                                                                        | 56706  | 3.01  | 3.48  | 2.22  | 1.35 | 0.55 ns  |
| Fancl         | Fanconi anemia, complementation group L                                          | 67030  | 0.60  | 0.62  | 0.60  | 0.99 | -0.24 ns |
| Dnajc19       | DnaJ (Hsp40) homolog, subfamily C, member 19                                     | 67713  | 1.43  | 1.43  | 1.13  | 1.26 | 0.31 ns  |
| Dst           | dystonin                                                                         | 13518  | 1.07  | 1.00  | 0.24  | 4.48 | 0.30 ns  |
| Nqo1          | NAD(P)H dehydrogenase, quinone 1                                                 | 18104  | 0.97  | 0.87  | 0.40  | 2.43 | 0.69 ns  |
| Pcdhga1       |                                                                                  | 93709  | 0.30  | 0.38  | 0.19  | 1.54 | 0.35 ns  |
| Pcdhga10      |                                                                                  | 93722  | 0.30  | 0.38  | 0.19  | 1.54 | 0.35 ns  |
| Pcdhga11      |                                                                                  | 93723  | 0.30  | 0.38  | 0.19  | 1.54 | 0.35 ns  |
| Pcdhga12      |                                                                                  | 93724  | 0.30  | 0.38  | 0.19  | 1.54 | 0.35 ns  |
| Pcdhga2       |                                                                                  | 93710  | 0.30  | 0.38  | 0.19  | 1.54 | 0.35 ns  |
| Pcdhga3       |                                                                                  | 93711  | 0.30  | 0.38  | 0.19  | 1.54 | 0.35 ns  |
| Pcdhga4       |                                                                                  | 93712  | 0.30  | 0.38  | 0.19  | 1.54 | 0.35 ns  |
| Pcdhga5       |                                                                                  | 93713  | 0.30  | 0.38  | 0.19  | 1.54 | 0.35 ns  |
| Pcdhga6       |                                                                                  | 93714  | 0.30  | 0.38  | 0.19  | 1.54 | 0.35 ns  |
| Pcdhga7       |                                                                                  | 93715  | 0.30  | 0.38  | 0.19  | 1.54 | 0.35 ns  |
| Pcdhga8       |                                                                                  | 93716  | 0.30  | 0.38  | 0.19  | 1.54 | 0.35 ns  |
| Pcdhga9       |                                                                                  | 93717  | 0.30  | 0.38  | 0.19  | 1.54 | 0.35 ns  |
| Pcdhgb1       |                                                                                  | 93699  | 0.30  | 0.38  | 0.19  | 1.54 | 0.35 ns  |
| Pcdhgb2       |                                                                                  | 93700  | 0.30  | 0.38  | 0.19  | 1.54 | 0.35 ns  |
| Pcdhgb4       |                                                                                  | 93701  | 0.30  | 0.38  | 0.19  | 1.54 | 0.35 ns  |
| Pcdhgb5       |                                                                                  | 93702  | 0.30  | 0.38  | 0.19  | 1.54 | 0.35 ns  |
| Pcdhgb6       |                                                                                  | 93703  | 0.30  | 0.38  | 0.19  | 1.54 | 0.35 ns  |
| Pcdhgb7       |                                                                                  | 93704  | 0.30  | 0.38  | 0.19  | 1.54 | 0.35 ns  |
| Pcdhgb8       |                                                                                  | 93705  | 0.30  | 0.38  | 0.19  | 1.54 | 0.35 ns  |
| Pcdhgc3       |                                                                                  | 93706  | 0.30  | 0.38  | 0.19  | 1.54 | 0.35 ns  |
| Pcdhgc4       |                                                                                  | 93707  | 0.30  | 0.38  | 0.19  | 1.54 | 0.35 ns  |
| Pcdhgc5       |                                                                                  | 93708  | 0.30  | 0.38  | 0.19  | 1.54 | 0.35 ns  |
| Cnot7         | CCR4-NOT transcription complex, subunit 7                                        | 18983  | 3.65  | 3.82  | 4.89  | 0.74 | -0.41 ns |
| Tubb2c        | tubulin, beta 2c                                                                 | 227613 | 6.98  | 7.20  | 7.77  | 0.89 | -0.19 ns |
| Zdhhc3        | zinc finger, DHHC domain containing 3                                            | 69035  | 0.55  | 0.59  | 0.58  | 0.94 | 0.37 ns  |
| Pdia6         | protein disulfide isomerase associated 6                                         | 71853  | 2.54  | 2.64  | 2.74  | 0.92 | -0.31 ns |
| Tmem68        | transmembrane protein 68                                                         | 72098  | 0.42  | 0.36  | 0.48  | 0.87 | -0.25 ns |
| Isca1         | iron-sulfur cluster assembly 1 homolog (S. cerevisiae)                           | 69046  | 2.11  | 1.55  | 1.51  | 1.39 | 0.61 ns  |
| Rnf4          | ring finger protein 4                                                            | 19822  | 1.81  | 1.69  | 1.99  | 0.91 | -0.64 ns |
| 1500010J02Rik | RIKEN cDNA 1500010J02 gene                                                       | 68964  | 1.04  | 0.82  | 1.17  | 0.88 | -0.24 ns |
| Tbc1d17       | TBC1 domain family, member 17                                                    | 233204 | 0.48  | 0.47  | 0.49  | 0.98 | -0.20 ns |
| Rpl5          | ribosomal protein L5                                                             | 19983  | 28.13 | 25.04 | 21.49 | 1.30 | 0.90 *   |
| Mat2a         | methionine adenosyltransferase II, alpha                                         | 232087 | 3.76  | 4.07  | 3.69  | 1.01 | -0.08 ns |
| Srpr          | signal recognition particle receptor ('docking protein')                         | 67398  | 1.95  | 1.66  | 1.53  | 1.27 | 0.86 *   |
| Ttc30b        | tetratricopeptide repeat domain 30B                                              | 72421  | 0.35  | 0.34  | 0.28  | 1.22 | -0.23 ns |
| BC017643      | cDNA sequence BC017643                                                           | 217370 | 0.48  | 0.49  | 0.60  | 0.80 | -0.16 ns |
| Fads1         | fatty acid desaturase 1                                                          | 76267  | 5.23  | 5.04  | 5.21  | 1.00 | 0.00 ns  |
| Cdca4         | cell division cycle associated 4                                                 | 71963  | 2.77  | 3.22  | 3.75  | 0.73 | -0.65 ns |
| Prr13         | proline rich 13                                                                  | 66151  | 3.30  | 3.42  | 3.87  | 0.85 | -0.74 ns |
| Man2c1        | mannosidase, alpha, class 2C, member 1                                           | 73744  | 1.69  | 1.27  | 1.25  | 1.35 | 0.83 *   |
| Ndufa8        | NADH dehydrogenase (ubiquinone) 1 alpha subcomplex, 8                            | 68375  | 3.03  | 2.72  | 2.45  | 1.23 | 0.25 ns  |
| Kctd10        | potassium channel tetramerisation domain containing 10                           | 330171 | 1.33  | 1.34  | 1.61  | 0.82 | -0.58 ns |
| Edem2         | ER degradation enhancer, mannosidase alpha-like 2                                | 108687 | 1.10  | 1.03  | 1.54  | 0.71 | -0.57 ns |
| Psm6          | proteasome (prosome, macropain) 26S subunit, non-ATPase, 6                       | 66413  | 3.84  | 3.45  | 3.14  | 1.21 | 0.96 **  |
| Ncaph2        | non-SMC condensin II complex, subunit H2                                         | 52683  | 3.50  | 3.21  | 3.75  | 0.93 | 0.21 ns  |
| Coasy         | Coenzyme A synthase                                                              | 71743  | 0.69  | 0.71  | 0.86  | 0.80 | -0.16 ns |
| H1f0          | H1 histone family, member 0                                                      | 14958  | 13.24 | 11.87 | 8.60  | 1.53 | 0.95 **  |
| Ppan          | peter pan homolog (Drosophila)                                                   | 235036 | 0.42  | 0.37  | 0.43  | 0.97 | 0.43 ns  |
| Tmem50b       | transmembrane protein 50B                                                        | 77975  | 1.09  | 0.70  | 0.91  | 1.20 | 0.01 ns  |
| Dlst          | dihydrolipoamide S-succinyltransferase (E2 component of 2-oxo-glutarate complex) | 78920  | 2.26  | 2.35  | 2.58  | 0.87 | -0.05 ns |
| Ndufaf1       | NADH dehydrogenase (ubiquinone) 1 alpha subcomplex, assembly factor 1            | 69702  | 0.79  | 0.56  | 0.45  | 1.72 | 0.64 ns  |
| Asf1b         | ASF1 anti-silencing function 1 homolog B (S. cerevisiae)                         | 66929  | 1.44  | 1.48  | 1.95  | 0.73 | -0.07 ns |
| Nedd8         | neural precursor cell expressed, developmentally down-regulated gene 8           | 18002  | 3.55  | 3.18  | 3.97  | 0.89 | -0.24 ns |
| Ak3           | adenylate kinase 3                                                               | 56248  | 2.75  | 2.88  | 1.64  | 1.66 | 0.66 ns  |
| Tpm1          | tropomyosin 1, alpha                                                             | 22003  | 5.47  | 4.58  | 3.78  | 1.44 | 0.84 *   |
| Tmem49        | transmembrane protein 49                                                         | 75909  | 2.41  | 2.58  | 3.46  | 0.69 | -0.93 ** |
| Zwint         | ZW10 interactor                                                                  | 52696  | 2.63  | 2.28  | 2.53  | 1.03 | -0.40 ns |
| Pls3          | plastin 3 (T-isoform)                                                            | 102866 | 2.22  | 2.99  | 2.83  | 0.78 | -0.73 ns |
| Cnih          | cornichon homolog (Drosophila)                                                   | 12793  | 2.95  | 2.99  | 3.20  | 0.92 | -0.76 ns |
| Cip1tm1       | CLPTM1-like                                                                      | 218335 | 2.70  | 3.79  | 4.49  | 0.60 | -0.76 ns |
| Tram1         | translocating chain-associating membrane protein 1                               | 72265  | 2.72  | 2.36  | 2.45  | 1.10 | 0.24 ns  |
| Fiz1          | Flt3 interacting zinc finger protein 1                                           | 23877  | 0.87  | 0.93  | 0.86  | 1.01 | -0.42 ns |
| Wdr36         | WD repeat domain 36                                                              | 225348 | 0.59  | 0.69  | 0.81  | 0.72 | -0.16 ns |
| Dym           | dymeclin                                                                         | 69190  | 0.37  | 0.53  | 0.60  | 0.60 | -0.08 ns |
| Ndufs3        | NADH dehydrogenase (ubiquinone) Fe-S protein 3                                   | 68349  | 2.73  | 1.93  | 1.91  | 1.42 | 0.47 ns  |
| Aplp2         | amyloid beta (A4) precursor-like protein 2                                       | 11804  | 8.39  | 7.14  | 7.60  | 1.10 | 0.62 ns  |
| Rbm10         | RNA binding motif protein 10                                                     | 236732 | 2.35  | 2.30  | 3.00  | 0.78 | -0.47 ns |
| Eif2s3x       | eukaryotic translation initiation factor 2, subunit 3, structural gene X-linked  | 26905  | 2.64  | 3.19  | 3.63  | 0.72 | -0.76 ns |
| Txndc5        | thioredoxin domain containing 5                                                  | 105245 | 1.55  | 1.40  | 1.57  | 0.99 | 0.27 ns  |
| Pdk1          | pyruvate dehydrogenase kinase, isoenzyme 1                                       | 228026 | 3.16  | 3.57  | 4.29  | 0.73 | -0.72 ns |
| Rangap1       | RAN GTPase activating protein 1                                                  | 19387  | 1.26  | 1.46  | 1.64  | 0.77 | -0.14 ns |
| Ddx47         | DEAD (Asp-Glu-Ala-Asp) box polypeptide 47                                        | 67755  | 1.22  | 1.27  | 1.40  | 0.87 | 0.15 ns  |
| Ilfim3        | interferon induced transmembrane protein 3                                       | 66141  | 0.68  | 1.16  | 5.20  | 0.13 | -0.67 ns |
| Zcchc8        | zinc finger, CCHC domain containing 8                                            | 70650  | 1.70  | 1.73  | 1.55  | 1.09 | 0.19 ns  |
| Tmco1         | transmembrane and coiled-coil domains 1                                          | 68944  | 5.34  | 5.03  | 4.08  | 1.30 | 0.43 ns  |
| Mrpl37        | mitochondrial ribosomal protein L37                                              | 56280  | 0.44  | 0.43  | 0.57  | 0.76 | -0.16 ns |
| Pak1ip1       | PAK1 interacting protein 1                                                       | 68083  | 2.03  | 2.16  | 2.08  | 0.97 | -0.01 ns |
| Ptcd2         | pentatricopeptide repeat domain 2                                                | 68927  | 0.41  | 0.50  | 0.66  | 0.61 | -0.67 ns |

|               |                                                                                          |        |       |       |       |      |           |
|---------------|------------------------------------------------------------------------------------------|--------|-------|-------|-------|------|-----------|
| Gbp1          | GC-rich promoter binding protein 1                                                       | 73274  | 2.86  | 3.96  | 3.90  | 0.73 | -0.53 ns  |
| Prc1          | protein regulator of cytokinesis 1                                                       | 233406 | 1.84  | 1.98  | 2.38  | 0.77 | 0.09 ns   |
| Tbc1d22a      | TBC1 domain family, member 22a                                                           | 223754 | 0.68  | 0.62  | 0.65  | 1.03 | -0.14 ns  |
| Gars          | glycyl-tRNA synthetase                                                                   | 353172 | 2.81  | 3.06  | 3.27  | 0.86 | -0.63 ns  |
| Egln1         | EGL nine homolog 1 (C. elegans)                                                          | 112405 | 2.55  | 2.39  | 2.27  | 1.11 | 0.48 ns   |
| 8430410A17Rik | RIKEN cDNA 8430410A17 gene                                                               | 232210 | 0.84  | 0.81  | 0.78  | 1.07 | 0.71 ns   |
| Nup133        | nucleoporin 133                                                                          | 234865 | 1.40  | 1.49  | 1.07  | 1.30 | 0.71 ns   |
| BC005624      | cDNA sequence BC005624                                                                   | 227707 | 0.96  | 1.13  | 0.70  | 1.36 | 0.49 ns   |
| D2Erd391e     | DNA segment, Chr 2, ERATO Doi 391, expressed                                             | 51897  | 0.32  | 0.28  | 0.29  | 1.11 | 0.05 ns   |
| Sfpq          | splicing factor proline/glutamine rich (polypyrimidine tract binding protein associated) | 71514  | 2.76  | 3.07  | 2.93  | 0.94 | -0.67 ns  |
| Eif1          | eukaryotic translation initiation factor 1                                               | 20918  | 14.95 | 14.88 | 15.60 | 0.95 | -0.77 ns  |
| Dars          | aspartyl-tRNA synthetase                                                                 | 226414 | 2.37  | 2.23  | 1.87  | 1.26 | 0.38 ns   |
| Gltscr2       | glioma tumor suppressor candidate region gene 2                                          | 68077  | 2.59  | 2.65  | 2.75  | 0.93 | -0.51 ns  |
| Ints4         | integrator complex subunit 4                                                             | 101861 | 0.45  | 0.52  | 0.49  | 0.91 | -0.52 ns  |
| Calm2         | calmodulin 2                                                                             | 12314  | 16.41 | 14.95 | 12.88 | 1.27 | 0.98 ***  |
| Tcf19         | transcription factor 19                                                                  | 106795 | 4.55  | 4.07  | 3.11  | 1.46 | 0.93 **   |
| Ppme1         | protein phosphatase methylesterase 1                                                     | 72590  | 0.80  | 0.60  | 0.92  | 0.86 | -0.26 ns  |
| Sf3a3         | splicing factor 3a, subunit 3                                                            | 75062  | 1.18  | 1.27  | 1.37  | 0.85 | -0.28 ns  |
| AW146242      | expressed sequence AW146242                                                              | 232023 | 1.23  | 1.72  | 2.08  | 0.59 | -0.99 *** |
| Ddx41         | DEAD (Asp-Glu-Ala-Asp) box polypeptide 41                                                | 72935  | 0.66  | 0.69  | 0.81  | 0.81 | -0.27 ns  |
| Ddx56         | DEAD (Asp-Glu-Ala-Asp) box polypeptide 56                                                | 52513  | 0.53  | 0.54  | 0.57  | 0.94 | -0.03 ns  |
| Arl6ip1       | ADP-ribosylation factor-like 6 interacting protein 1                                     | 54208  | 4.87  | 4.71  | 4.69  | 1.03 | 0.40 ns   |
| Elof1         | elongation factor 1 homolog (ELF1, S. cerevisiae)                                        | 66126  | 1.93  | 1.62  | 1.48  | 1.30 | 0.82 *    |
| Tmem168       | transmembrane protein 168                                                                | 101118 | 0.49  | 0.54  | 0.62  | 0.79 | -0.63 ns  |
| Mrto4         | MRT4, mRNA turnover 4, homolog (S. cerevisiae)                                           | 69902  | 0.66  | 0.94  | 0.75  | 0.89 | 0.20 ns   |
| Gpr177        | G protein-coupled receptor 177                                                           | 68151  | 4.97  | 4.94  | 3.60  | 1.37 | -0.02 ns  |
| Noc4l         | nucleolar complex associated 4 homolog (S. cerevisiae)                                   | 100608 | 0.98  | 0.93  | 0.99  | 0.99 | -0.12 ns  |
| Fasn          | fatty acid synthase                                                                      | 14104  | 3.17  | 3.03  | 2.94  | 1.07 | 0.78 ns   |
| 0910001A06Rik | RIKEN cDNA 0910001A06 gene                                                               | 223601 | 4.10  | 3.86  | 2.21  | 1.85 | 0.16 ns   |
| Brp44         | brain protein 44                                                                         | 70456  | 1.96  | 2.12  | 1.31  | 1.48 | 0.28 ns   |
| Gga1          | golgi associated, gamma adaptin ear containing, ARF binding protein 1                    | 106039 | 0.80  | 0.64  | 0.85  | 0.94 | 0.16 ns   |
| 2400003C14Rik | RIKEN cDNA 2400003C14 gene                                                               | 71955  | 3.09  | 3.22  | 2.31  | 1.33 | 0.76 ns   |
| Tuba1b        | tubulin, alpha 1B                                                                        | 22143  | 27.09 | 24.38 | 20.66 | 1.30 | 0.98 ***  |
| Ncapd2        | non-SMC condensin I complex, subunit D2                                                  | 68298  | 2.06  | 2.25  | 3.12  | 0.66 | -0.43 ns  |
| Mphosph6      | M phase phosphoprotein 6                                                                 | 68533  | 0.90  | 0.92  | 0.67  | 1.34 | 0.77 ns   |
| Clk3          | CDC-like kinase 3                                                                        | 102414 | 0.40  | 0.38  | 0.58  | 0.69 | -0.35 ns  |
| Nsun2         | NOL1/NOP2/Sun domain family 2                                                            | 28114  | 1.18  | 1.84  | 2.38  | 0.49 | -0.83 *   |
| Ras11b        | RAS-like, family 11, member B                                                            | 68939  | 3.80  | 2.99  | 2.04  | 1.85 | 0.87 *    |
| Mrpl30        | mitochondrial ribosomal protein L30                                                      | 107734 | 3.50  | 3.43  | 3.12  | 1.12 | 0.96 **   |
| Abcf2         | ATP-binding cassette, sub-family F (GCN20), member 2                                     | 27407  | 0.45  | 0.53  | 0.61  | 0.73 | -0.67 ns  |
| Nrbp1         | nuclear receptor binding protein 1                                                       | 192292 | 0.61  | 0.49  | 0.83  | 0.74 | -0.57 ns  |
| Tmem63a       | transmembrane protein 63a                                                                | 208795 | 0.34  | 0.40  | 0.43  | 0.79 | -0.61 ns  |
| Lsm1          | LSM1 homolog, U6 small nuclear RNA associated (S. cerevisiae)                            | 67207  | 0.68  | 0.74  | 0.79  | 0.85 | -0.13 ns  |
| Chaf1b        | chromatin assembly factor 1, subunit B (p60)                                             | 110749 | 2.23  | 2.06  | 2.53  | 0.88 | -0.66 ns  |
| D030056L22Rik | RIKEN cDNA D030056L22 gene                                                               | 225995 | 1.99  | 1.75  | 1.50  | 1.32 | 0.84 *    |
| Saps3         | SAPS domain family, member 3                                                             | 52036  | 2.63  | 2.11  | 1.60  | 1.63 | 0.97 **   |
| Rfwd3         | ring finger and WD repeat domain 3                                                       | 234736 | 1.97  | 2.17  | 1.78  | 1.10 | 0.65 ns   |
| Acs11         | acyl-CoA synthetase long-chain family member 1                                           | 14081  | 0.31  | 0.38  | 0.33  | 0.93 | -0.57 ns  |
| Cirh1a        | cirrhhosis, autosomal recessive 1A (human)                                               | 21771  | 1.21  | 1.58  | 0.91  | 1.33 | 0.47 ns   |
| Lamc1         | laminin, gamma 1                                                                         | 226519 | 0.91  | 0.89  | 0.71  | 1.28 | 0.07 ns   |
| Gstt3         | glutathione S-transferase, theta 3                                                       | 103140 | 0.69  | 0.66  | 0.47  | 1.45 | 0.58 ns   |
| Dalrd3        | DALR anticodon binding domain containing 3                                               | 67789  | 0.45  | 0.43  | 0.44  | 1.02 | -0.11 ns  |
| Cugbp2        | CUG triplet repeat, RNA binding protein 2                                                | 14007  | 1.60  | 1.42  | 0.81  | 1.95 | 0.81 ns   |
| Rnf187        | ring finger protein 187                                                                  | 108660 | 3.97  | 4.07  | 4.01  | 0.98 | -0.57 ns  |
| Trip12        | thyroid hormone receptor interactor 12                                                   | 14897  | 4.47  | 4.26  | 3.21  | 1.38 | 0.50 ns   |
| Arhgef12      | Rho guanine nucleotide exchange factor (GEF) 12                                          | 69632  | 3.92  | 3.02  | 2.80  | 1.39 | 0.88 *    |
| Ndufs8        | NADH dehydrogenase (ubiquinone) Fe-S protein 8                                           | 225887 | 6.33  | 8.38  | 5.97  | 1.06 | -0.35 ns  |
| Tmem176a      | transmembrane protein 176A                                                               | 66058  | 0.31  | 0.55  | 0.89  | 0.34 | -0.67 ns  |
| Ppp2r5a       | protein phosphatase 2, regulatory subunit B (B56), alpha isoform                         | 226849 | 1.66  | 1.58  | 1.19  | 1.39 | 0.55 ns   |
| Aspscr1       | alveolar soft part sarcoma chromosome region, candidate 1 (human)                        | 68938  | 0.69  | 0.72  | 0.91  | 0.75 | -0.61 ns  |
| C630004H02Rik | RIKEN cDNA C630004H02 gene                                                               | 217310 | 0.46  | 0.59  | 0.26  | 1.77 | 0.63 ns   |
| Mlf2          | myeloid leukemia factor 2                                                                | 30853  | 3.09  | 3.02  | 3.31  | 0.93 | -0.45 ns  |
| Rhbdd1        | rhomboid domain containing 1                                                             | 76867  | 1.30  | 1.27  | 0.80  | 1.62 | 0.42 ns   |
| BC023882      | cDNA sequence BC023882                                                                   | 231123 | 1.31  | 1.33  | 1.64  | 0.79 | -0.15 ns  |
| Ints3         | integrator complex subunit 3                                                             | 229543 | 0.95  | 1.32  | 0.90  | 1.06 | 0.15 ns   |
| Tspan14       | tetraspanin 14                                                                           | 52588  | 1.34  | 1.46  | 1.61  | 0.83 | -0.53 ns  |
| Dhx16         | DEAH (Asp-Glu-Ala-His) box polypeptide 16                                                | 69192  | 1.22  | 1.15  | 0.88  | 1.38 | 0.78 ns   |
| Slc35b2       | solute carrier family 35, member B2                                                      | 73836  | 0.95  | 0.83  | 0.60  | 1.58 | 0.99 ***  |
| Anapc4        | anaphase promoting complex subunit 4                                                     | 52206  | 1.56  | 1.64  | 1.83  | 0.84 | -0.55 ns  |
| 1600029D21Rik | RIKEN cDNA 1600029D21 gene                                                               | 76509  | 6.30  | 6.88  | 5.83  | 1.08 | 0.58 ns   |
| Kctd5         | potassium channel tetramerisation domain containing 5                                    | 69259  | 0.84  | 0.72  | 0.67  | 1.24 | 0.68 ns   |
| Ligl2         | lethal giant larvae homolog 2 (Drosophila)                                               | 217325 | 1.36  | 1.16  | 1.33  | 1.02 | 0.29 ns   |
| Yif1a         | Yip1 interacting factor homolog A (S. cerevisiae)                                        | 68090  | 3.07  | 2.68  | 1.99  | 1.53 | 0.99 ***  |
| Camk2g        | calcium/calmodulin-dependent protein kinase II gamma                                     | 12325  | 0.69  | 0.73  | 0.65  | 1.05 | 0.15 ns   |
| Pdlim2        | PDZ and LIM domain 2                                                                     | 213019 | 0.58  | 0.54  | 0.70  | 0.82 | -0.33 ns  |
| 1110008P14Rik | RIKEN cDNA 1110008P14 gene                                                               | 73737  | 0.94  | 1.05  | 0.66  | 1.41 | 0.08 ns   |
| Bag2          | Bcl2-associated athanogene 2                                                             | 213539 | 1.68  | 1.62  | 1.38  | 1.22 | -0.16 ns  |
| Ube2z         | ubiquitin-conjugating enzyme E2Z (putative)                                              | 268470 | 2.10  | 1.90  | 2.45  | 0.85 | -0.65 ns  |
| Tm2d3         | TM2 domain containing 3                                                                  | 68634  | 0.37  | 0.35  | 0.51  | 0.71 | -0.43 ns  |
| Krt7          | keratin 7                                                                                | 110310 | 7.40  | 7.72  | 7.26  | 1.01 | 0.58 ns   |
| Cdkal1        | CDK5 regulatory subunit associated protein 1-like 1                                      | 68916  | 0.51  | 0.43  | 0.38  | 1.32 | 0.95 **   |
| C3            | complement component 3                                                                   | 12266  | 1.01  | 2.22  | 3.93  | 0.26 | -0.33 ns  |
| Lass2         | longevity assurance homolog 2 (S. cerevisiae)                                            | 76893  | 2.25  | 2.24  | 1.98  | 1.13 | 0.04 ns   |
| Smap1         | stromal membrane-associated protein 1                                                    | 98366  | 1.23  | 1.31  | 1.10  | 1.11 | 0.29 ns   |
| Ttc33         | tetratricopeptide repeat domain 33                                                       | 67515  | 0.97  | 0.99  | 0.93  | 1.03 | 0.04 ns   |
| Cpsf3l        | cleavage and polyadenylation specific factor 3-like                                      | 71957  | 0.79  | 0.88  | 1.03  | 0.76 | -0.44 ns  |

|               |                                                                     |        |       |       |       |      |          |
|---------------|---------------------------------------------------------------------|--------|-------|-------|-------|------|----------|
| Cd99l2        | Cd99 antigen-like 2                                                 | 171486 | 0.53  | 0.55  | 0.79  | 0.66 | -0.45 ns |
| Nup37         | nucleoporin 37                                                      | 69736  | 1.46  | 1.47  | 1.06  | 1.37 | 0.70 ns  |
| Thoc3         | THO complex 3                                                       | 73666  | 1.20  | 1.07  | 1.11  | 1.08 | 0.70 ns  |
| EtfA          | electron transferring flavoprotein, alpha polypeptide               | 110842 | 3.76  | 2.87  | 3.02  | 1.24 | 0.75 ns  |
| Numa1         | nuclear mitotic apparatus protein 1                                 | 101706 | 1.73  | 1.78  | 2.11  | 0.82 | -0.59 ns |
| 4930453N24Rik | RIKEN cDNA 4930453N24 gene                                          | 67609  | 1.37  | 1.21  | 1.05  | 1.29 | 0.58 ns  |
| Fusip1        | FUS interacting protein (serine-arginine rich) 1                    | 14105  | 2.11  | 2.50  | 2.70  | 0.78 | -0.69 ns |
| Cdc26         | cell division cycle 26                                              | 66440  | 0.68  | 0.82  | 0.88  | 0.77 | -0.43 ns |
| Rab28         | RAB28, member RAS oncogene family                                   | 100972 | 1.48  | 1.63  | 1.37  | 1.07 | 0.21 ns  |
| Nol14         | nucleolar protein 14                                                | 75416  | 0.56  | 0.67  | 0.62  | 0.91 | -0.14 ns |
| Gatad2a       | GATA zinc finger domain containing 2A                               | 234366 | 2.59  | 2.13  | 2.27  | 1.14 | 0.55 ns  |
| Atp6v1f       | ATPase, H+ transporting, lysosomal V1 subunit F                     | 66144  | 4.16  | 4.41  | 5.58  | 0.74 | -0.61 ns |
| Kif1b         | kinesin family member 1B                                            | 16561  | 0.41  | 0.44  | 0.61  | 0.67 | -0.13 ns |
| Gtf3c5        | general transcription factor IIIC, polypeptide 5                    | 70239  | 0.67  | 0.65  | 0.41  | 1.64 | 0.60 ns  |
| Abl1          | v-abl Abelson murine leukemia oncogene 1                            | 11350  | 0.93  | 0.89  | 0.70  | 1.34 | 0.04 ns  |
| Rps11         | ribosomal protein S11                                               | 27207  | 16.62 | 16.08 | 14.94 | 1.11 | 0.31 ns  |
| Mki67ip       | Mki67 (FHA domain) interacting nucleolar phosphoprotein             | 67949  | 0.83  | 0.80  | 0.57  | 1.45 | 0.58 ns  |
| Pdcl3         | phosducin-like 3                                                    | 68833  | 1.91  | 2.04  | 1.74  | 1.09 | 0.56 ns  |
| 4930444A02Rik | RIKEN cDNA 4930444A02 gene                                          | 74653  | 0.68  | 0.53  | 0.35  | 1.96 | 0.97 **  |
| B230219D22Rik | RIKEN cDNA B230219D22 gene                                          | 78521  | 6.20  | 5.21  | 5.33  | 1.16 | 0.81 ns  |
| Aarsd1        | alanyl-tRNA synthetase domain containing 1                          | 69684  | 0.71  | 0.78  | 0.82  | 0.86 | 0.22 ns  |
| Etf1          | eukaryotic translation termination factor 1                         | 225363 | 1.55  | 1.70  | 1.70  | 0.91 | 0.19 ns  |
| 2310007F21Rik | RIKEN cDNA 2310007F21 gene                                          | 66939  | 0.50  | 0.34  | 0.35  | 1.42 | 0.84 *   |
| Hint1         | histidine triad nucleotide binding protein 1                        | 15254  | 11.78 | 11.89 | 12.98 | 0.90 | -0.33 ns |
| Nol1          | nucleolar protein 1                                                 | 110109 | 0.52  | 0.71  | 0.65  | 0.80 | -0.49 ns |
| Arl6ip6       |                                                                     | 65103  | 1.50  | 1.37  | 1.70  | 0.88 | -0.11 ns |
| LOC674449     |                                                                     | 674449 | 1.50  | 1.37  | 1.70  | 0.88 | -0.11 ns |
| Osgin1        | oxidative stress induced growth inhibitor 1                         | 71839  | 0.75  | 0.65  | 0.47  | 1.61 | -0.03 ns |
| Atpbd3        | ATP binding domain 3                                                | 233189 | 0.32  | 0.40  | 0.35  | 0.90 | -0.31 ns |
| Mcf2          | multiple coagulation factor deficiency 2                            | 193813 | 1.53  | 1.31  | 1.18  | 1.29 | 0.94 **  |
| BC013529      | cDNA sequence BC013529                                              | 215751 | 0.87  | 0.68  | 0.66  | 1.32 | 0.46 ns  |
| 5830457O10Rik | RIKEN cDNA 5830457O10 gene                                          | 214987 | 1.70  | 1.78  | 1.22  | 1.39 | 0.65 ns  |
| Tspyl4        | TSPY-like 4                                                         | 72480  | 0.47  | 0.41  | 0.21  | 2.20 | 0.54 ns  |
| Prpf6         | PRP6 pre-mRNA splicing factor 6 homolog (yeast)                     | 68879  | 1.12  | 1.15  | 1.13  | 0.98 | -0.29 ns |
| 2310044H10Rik | RIKEN cDNA 2310044H10 gene                                          | 69683  | 0.85  | 0.98  | 1.20  | 0.70 | -0.22 ns |
| Tmem66        | transmembrane protein 66                                            | 67887  | 2.40  | 2.57  | 3.10  | 0.77 | -0.41 ns |
| Mtap7d1       | microtubule-associated protein 7 domain containing 1                | 245877 | 0.68  | 0.62  | 0.74  | 0.92 | 0.14 ns  |
| Tmem5         | transmembrane protein 5                                             | 216395 | 0.72  | 0.74  | 0.64  | 1.13 | 0.04 ns  |
| Ppil4         | peptidylprolyl isomerase (cyclophilin)-like 4                       | 67418  | 0.80  | 0.84  | 0.67  | 1.18 | 0.27 ns  |
| Jmjd2b        | jumonji domain containing 2B                                        | 193796 | 0.45  | 0.36  | 0.30  | 1.49 | 0.90 *   |
| 5730437N04Rik | RIKEN cDNA 5730437N04 gene                                          | 70544  | 1.17  | 0.92  | 0.53  | 2.20 | 0.86 *   |
| Bub1          | budding uninhibited by benzimidazoles 1 homolog (S. cerevisiae)     | 12235  | 1.83  | 2.10  | 2.79  | 0.65 | -0.24 ns |
| Dera          | 2-deoxyribose-5-phosphate aldolase homolog (C. elegans)             | 232449 | 0.60  | 0.60  | 0.62  | 0.96 | 0.27 ns  |
| Cyb5r1        | cytochrome b5 reductase 1                                           | 72017  | 1.98  | 1.91  | 1.77  | 1.11 | -0.32 ns |
| Lrrc42        | leucine rich repeat containing 42                                   | 77809  | 0.56  | 0.47  | 0.64  | 0.86 | -0.28 ns |
| Col4a2        | procollagen, type IV, alpha 2                                       | 12827  | 1.04  | 0.80  | 0.81  | 1.27 | 0.48 ns  |
| Thap4         | THAP domain containing 4                                            | 67026  | 1.23  | 1.11  | 0.89  | 1.38 | 0.74 ns  |
| Tcf25         | transcription factor 25 (basic helix-loop-helix)                    | 66855  | 2.58  | 2.96  | 1.92  | 1.34 | 0.49 ns  |
| Btbd2         | BTB (POZ) domain containing 2                                       | 208198 | 1.16  | 0.96  | 0.95  | 1.21 | 0.13 ns  |
| Ncoa5         | nuclear receptor coactivator 5                                      | 228869 | 0.43  | 0.46  | 0.42  | 1.04 | -0.06 ns |
| Gdap2         | ganglioside-induced differentiation-associated-protein 2            | 14547  | 0.65  | 0.73  | 0.60  | 1.09 | 0.05 ns  |
| Suv420h2      | suppressor of variegation 4-20 homolog 2 (Drosophila)               | 232811 | 0.46  | 0.43  | 0.54  | 0.83 | -0.49 ns |
| Neil3         | nei like 3 (E. coli)                                                | 234258 | 0.22  | 0.16  | 0.38  | 0.58 | -0.09 ns |
| Manbal        | mannosidase, beta A, lysosomal-like                                 | 69161  | 0.55  | 0.50  | 0.56  | 0.99 | 0.48 ns  |
| Ube2d1        | ubiquitin-conjugating enzyme E2D 1, UBC4/5 homolog (yeast)          | 216080 | 0.74  | 1.04  | 1.09  | 0.67 | -0.85 *  |
| Rab1b         | RAB1B, member RAS oncogene family                                   | 76308  | 2.54  | 2.29  | 1.73  | 1.46 | 0.82 *   |
| Napg          | N-ethylmaleimide sensitive fusion protein attachment protein gamma  | 108123 | 0.61  | 0.59  | 0.87  | 0.70 | -0.26 ns |
| BC018507      | cDNA sequence BC018507                                              | 218333 | 0.73  | 0.96  | 1.22  | 0.59 | -0.61 ns |
| 2010107G23Rik | RIKEN cDNA 2010107G23 gene                                          | 69894  | 0.36  | 0.36  | 0.41  | 0.86 | 0.05 ns  |
| 5430437P03Rik | RIKEN cDNA 5430437P03 gene                                          | 68251  | 1.79  | 1.80  | 2.28  | 0.78 | -0.14 ns |
| 9430016H08Rik | RIKEN cDNA 9430016H08 gene                                          | 68115  | 0.96  | 0.95  | 0.67  | 1.42 | 0.32 ns  |
| Gdpd1         | glycerophosphodiester phosphodiesterase domain containing 1         | 66569  | 0.47  | 0.54  | 0.53  | 0.90 | -0.56 ns |
| Urm1          | ubiquitin related modifier 1 homolog (S. cerevisiae)                | 68205  | 0.57  | 0.48  | 0.41  | 1.38 | 0.73 ns  |
| Dcps          | decapping enzyme, scavenger                                         | 69305  | 0.77  | 0.75  | 0.50  | 1.52 | 0.86 *   |
| Pcgf6         | polycomb group ring finger 6                                        | 71041  | 1.85  | 1.95  | 1.47  | 1.25 | 0.17 ns  |
| Ndufa4        | NADH dehydrogenase (ubiquinone) 1 alpha subcomplex, 4               | 17992  | 6.05  | 5.44  | 5.74  | 1.05 | -0.05 ns |
| Oaf           | OAF homolog (Drosophila)                                            | 102644 | 1.08  | 0.80  | 0.69  | 1.56 | 0.94 **  |
| Myg1          | melanocyte proliferating gene 1                                     | 60315  | 1.79  | 1.70  | 1.43  | 1.25 | 0.83 *   |
| Al449175      | expressed sequence Al449175                                         | 234362 | 0.38  | 0.35  | 0.46  | 0.83 | -0.39 ns |
| Epb4.1        | erythrocyte protein band 4.1                                        | 269587 | 1.09  | 1.11  | 0.80  | 1.36 | 0.54 ns  |
| Nek9          | NIMA (never in mitosis gene a)-related expressed kinase 9           | 217718 | 2.68  | 2.66  | 2.83  | 0.94 | 0.08 ns  |
| Rtcd1         | RNA terminal phosphate cyclase domain 1                             | 66368  | 1.51  | 1.49  | 1.28  | 1.17 | 0.92 **  |
| Atg4b         | autophagy-related 4B (yeast)                                        | 66615  | 0.53  | 0.47  | 0.49  | 1.07 | -0.25 ns |
| Syf2          | SYF2 homolog, RNA splicing factor (S. cerevisiae)                   | 68592  | 1.02  | 0.92  | 1.00  | 1.02 | 0.21 ns  |
| Kif18a        | kinesin family member 18A                                           | 228421 | 0.27  | 0.31  | 0.33  | 0.79 | -0.02 ns |
| Glo1          | glyoxalase 1                                                        | 109801 | 1.94  | 1.98  | 1.27  | 1.53 | 0.64 ns  |
| Nme1          | expressed in non-metastatic cells 1, protein                        | 18102  | 2.28  | 2.14  | 1.97  | 1.15 | 0.22 ns  |
| Igf2r         | insulin-like growth factor 2 receptor                               | 16004  | 0.90  | 0.83  | 0.71  | 1.27 | -0.31 ns |
| Lamb1-1       | laminin B1 subunit 1                                                | 16777  | 3.85  | 3.83  | 4.04  | 0.95 | -0.74 ns |
| Ppp5c         | protein phosphatase 5, catalytic subunit                            | 19060  | 0.78  | 0.63  | 0.76  | 1.03 | -0.26 ns |
| BC056474      | cDNA sequence BC056474                                              | 414077 | 1.47  | 1.31  | 1.38  | 1.06 | 0.57 ns  |
| Spc25         | SPC25, NDC80 kinetochore complex component, homolog (S. cerevisiae) | 66442  | 2.59  | 2.48  | 2.03  | 1.27 | 0.73 ns  |
| Prkab1        | protein kinase, AMP-activated, beta 1 non-catalytic subunit         | 19079  | 2.35  | 2.41  | 3.50  | 0.67 | -0.85 *  |
| Rnf8          | ring finger protein 8                                               | 58230  | 0.69  | 0.67  | 0.50  | 1.37 | 0.76 ns  |
| Commd1        | COMM domain containing 1                                            | 17846  | 0.90  | 1.00  | 1.44  | 0.63 | -0.28 ns |
| Mospd2        | motile sperm domain containing 2                                    | 76763  | 1.60  | 1.77  | 2.08  | 0.77 | -0.13 ns |
| Alas1         | aminolevulinic acid synthase 1                                      | 11655  | 0.58  | 0.47  | 0.72  | 0.81 | -0.41 ns |

|               |                                                                                                |        |      |      |      |      |          |
|---------------|------------------------------------------------------------------------------------------------|--------|------|------|------|------|----------|
| Aurkb         | aurora kinase B                                                                                | 20877  | 1.00 | 1.18 | 1.73 | 0.58 | -0.33 ns |
| Ptrf          | polymerase I and transcript release factor                                                     | 19285  | 2.84 | 3.38 | 2.99 | 0.94 | 0.36 ns  |
| Tmem98        | transmembrane protein 98                                                                       | 103743 | 3.78 | 3.58 | 3.55 | 1.06 | -0.43 ns |
| Rspry1        | ring finger and SPRY domain containing 1                                                       | 67610  | 0.69 | 0.69 | 0.74 | 0.93 | 0.39 ns  |
| EG667598      |                                                                                                | 667598 | 0.86 | 0.93 | 0.83 | 1.04 | 0.49 ns  |
| LOC624822     |                                                                                                | 624822 | 0.86 | 0.93 | 0.83 | 1.04 | 0.49 ns  |
| Rhbd1         | rhomboid family 1 (Drosophila)                                                                 | 13650  | 2.48 | 2.43 | 2.56 | 0.97 | 0.09 ns  |
| Rap1a         | RAS-related protein-1a                                                                         | 109905 | 3.93 | 4.36 | 3.45 | 1.13 | 0.09 ns  |
| Hectd1        | HECT domain containing 1                                                                       | 207304 | 4.88 | 4.19 | 5.14 | 0.94 | -0.43 ns |
| Cdt1          | chromatin licensing and DNA replication factor 1                                               | 67177  | 6.72 | 6.68 | 4.75 | 1.41 | 0.73 ns  |
| Ahsa1         | AHA1, activator of heat shock protein ATPase homolog 1 (yeast)                                 | 217737 | 2.71 | 2.83 | 3.38 | 0.80 | -0.53 ns |
| Nsmce2        | non-SMC element 2 homolog (MMS21, S. cerevisiae)                                               | 68501  | 1.05 | 1.12 | 1.24 | 0.84 | -0.27 ns |
| Jtv1          | JTV1 gene                                                                                      | 231872 | 1.41 | 1.58 | 1.66 | 0.84 | -0.43 ns |
| Isca2         | iron-sulfur cluster assembly 2 homolog (S. cerevisiae)                                         | 74316  | 1.31 | 1.23 | 1.45 | 0.90 | -0.17 ns |
| Rbl1          | retinoblastoma-like 1 (p107)                                                                   | 19650  | 2.81 | 2.67 | 3.17 | 0.88 | 0.11 ns  |
| Alg5          | asparagine-linked glycosylation 5 homolog (yeast, dolichyl-phosphate beta-glucosyltransferase) | 66248  | 1.02 | 1.03 | 1.05 | 0.96 | -0.46 ns |
| Ddx27         | DEAD (Asp-Glu-Ala-Asp) box polypeptide 27                                                      | 228889 | 0.71 | 0.83 | 1.07 | 0.66 | -0.64 ns |
| Rmnd5b        | required for meiotic nuclear division 5 homolog B (S. cerevisiae)                              | 66089  | 0.64 | 0.63 | 0.98 | 0.65 | -0.84 *  |
| Mrp150        | mitochondrial ribosomal protein L50                                                            | 28028  | 0.39 | 0.38 | 0.41 | 0.94 | -0.56 ns |
| Sharnin       | SHANK-associated RH domain interacting protein                                                 | 106025 | 0.77 | 0.78 | 1.13 | 0.68 | -0.71 ns |
| Msh3          | mutS homolog 3 (E. coli)                                                                       | 17686  | 0.42 | 0.50 | 0.67 | 0.63 | -0.96 ** |
| Pmm1          | phosphomannomutase 1                                                                           | 29858  | 1.04 | 1.07 | 1.72 | 0.60 | -0.83 *  |
| Capzb         | capping protein (actin filament) muscle Z-line, beta                                           | 12345  | 3.57 | 3.48 | 3.59 | 0.99 | 0.08 ns  |
| Phf5a         | PHD finger protein 5A                                                                          | 68479  | 2.05 | 1.78 | 2.33 | 0.88 | -0.02 ns |
| Hagh          | hydroxyacyl glutathione hydrolase                                                              | 14651  | 1.20 | 1.27 | 1.23 | 0.97 | -0.12 ns |
| Sh3kbp1       | Sh3kbp1 binding protein 1                                                                      | 192192 | 1.10 | 1.03 | 1.09 | 1.00 | 0.22 ns  |
| Tef           | thyrotroph embryonic factor                                                                    | 21685  | 1.00 | 0.96 | 0.95 | 1.05 | 0.45 ns  |
| Plekhh1       | pleckstrin homology domain containing, family J member 1                                       | 78670  | 0.60 | 0.50 | 0.55 | 1.09 | -0.35 ns |
| Acat1         | acetyl-Coenzyme A acetyltransferase 1                                                          | 110446 | 1.91 | 1.67 | 1.53 | 1.24 | 0.88 *   |
| Acadv1        | acyl-Coenzyme A dehydrogenase, very long chain                                                 | 11370  | 1.52 | 1.45 | 2.24 | 0.67 | -0.48 ns |
| Rabgap1       | RAB GTPase activating protein 1                                                                | 227800 | 1.69 | 1.38 | 1.12 | 1.51 | 0.47 ns  |
| Pigc          | phosphatidylinositol glycan anchor biosynthesis, class C                                       | 67292  | 0.84 | 0.62 | 0.51 | 1.62 | 0.51 ns  |
| Tmem41a       | transmembrane protein 41a                                                                      | 66664  | 0.71 | 0.57 | 0.67 | 1.06 | -0.35 ns |
| 1500011H22Rik | RIKEN cDNA 1500011H22 gene                                                                     | 68948  | 0.96 | 0.99 | 1.04 | 0.92 | -0.20 ns |
| Pwp2          | PWP2 periodic tryptophan protein homolog (yeast)                                               | 110816 | 0.36 | 0.38 | 0.41 | 0.88 | -0.32 ns |
| Yip1          | Yip1 domain family, member 1                                                                   | 230584 | 0.59 | 0.60 | 0.63 | 0.93 | -0.49 ns |
| Dlg5          | discs, large homolog 5 (Drosophila)                                                            | 71228  | 1.16 | 1.19 | 0.88 | 1.31 | 0.13 ns  |
| Seh1l         | SEH1-like (S. cerevisiae)                                                                      | 72124  | 2.31 | 2.50 | 2.85 | 0.81 | -0.19 ns |
| Ncln          | nicalin homolog (zebrafish)                                                                    | 103425 | 0.87 | 0.82 | 0.70 | 1.24 | 0.61 ns  |
| Mrp13         | mitochondrial ribosomal protein L13                                                            | 68537  | 3.49 | 3.00 | 3.36 | 1.03 | 0.03 ns  |
| Smarca5       |                                                                                                | 93762  | 4.36 | 4.78 | 4.85 | 0.89 | -0.09 ns |
| Ptger4        | prostaglandin E receptor 4 (subtype EP4)                                                       | 19219  | 0.49 | 0.72 | 0.95 | 0.51 | -0.71 ns |
| Rars2         | arginyl-tRNA synthetase 2, mitochondrial (putative)                                            | 109093 | 0.66 | 0.75 | 0.62 | 1.06 | 0.35 ns  |
| Erlin1        | ER lipid raft associated 1                                                                     | 226144 | 1.66 | 1.80 | 1.19 | 1.38 | 0.78 ns  |
| 9430023L20Rik | RIKEN cDNA 9430023L20 gene                                                                     | 68118  | 0.79 | 0.78 | 0.83 | 0.94 | 0.30 ns  |
| Ubiad1        | UbiA prenyltransferase domain containing 1                                                     | 71707  | 0.40 | 0.37 | 0.42 | 0.96 | 0.30 ns  |
| 9130213B05Rik | RIKEN cDNA 9130213B05 gene                                                                     | 231440 | 0.20 | 0.33 | 0.35 | 0.56 | -0.71 ns |
| Fundc1        | FUN14 domain containing 1                                                                      | 72018  | 0.73 | 0.66 | 0.88 | 0.82 | -0.50 ns |
| Papola        | poly (A) polymerase alpha                                                                      | 18789  | 1.10 | 1.21 | 1.84 | 0.60 | -0.60 ns |
| Porcn         | porcupine homolog (Drosophila)                                                                 | 53627  | 0.22 | 0.20 | 0.46 | 0.47 | -0.31 ns |
| Rad23b        | RAD23b homolog (S. cerevisiae)                                                                 | 19359  | 1.71 | 1.70 | 2.04 | 0.83 | -0.79 ns |
| Asb8          | ankyrin repeat and SOCS box-containing protein 8                                               | 78541  | 0.81 | 0.75 | 0.95 | 0.84 | -0.50 ns |
| Polr3h        | polymerase (RNA) III (DNA directed) polypeptide H                                              | 78929  | 0.66 | 0.69 | 0.73 | 0.90 | -0.20 ns |
| Ormdl2        | ORM1-like 2 (S. cerevisiae)                                                                    | 66844  | 2.06 | 1.82 | 1.75 | 1.18 | -0.05 ns |
| Tbc1d10b      | TBC1 domain family, member 10b                                                                 | 68449  | 1.05 | 1.15 | 1.33 | 0.79 | -0.48 ns |
| Zfp639        | zinc finger protein 639                                                                        | 67778  | 0.95 | 0.86 | 0.70 | 1.34 | 0.93 **  |
| Sirt7         | sirtuin 7 (silent mating type information regulation 2, homolog) 7 (S. cerevisiae)             | 209011 | 1.20 | 0.89 | 1.25 | 0.96 | 0.24 ns  |
| 2310066E14Rik | RIKEN cDNA 2310066E14 gene                                                                     | 75687  | 0.76 | 0.84 | 0.69 | 1.10 | 0.47 ns  |
| Arfp2         | ADP-ribosylation factor interacting protein 2                                                  | 76932  | 0.57 | 0.62 | 0.76 | 0.75 | -0.85 *  |
| Slc30a6       | solute carrier family 30 (zinc transporter), member 6                                          | 210148 | 1.21 | 0.90 | 0.64 | 1.89 | 0.94 **  |
| Bphl          | biphenyl hydrolase-like (serine hydrolase, breast epithelial mucin-associated antigen)         | 68021  | 0.71 | 0.51 | 0.62 | 1.14 | -0.27 ns |
| Tes           | testis derived transcript                                                                      | 21753  | 1.99 | 2.42 | 2.49 | 0.80 | 0.13 ns  |
| Erc1          | ELKS/RAB6-interacting/CAST family member 1                                                     | 111173 | 0.52 | 0.53 | 0.59 | 0.88 | -0.21 ns |
| Arhgef3       | Rho guanine nucleotide exchange factor (GEF) 3                                                 | 71704  | 0.19 | 0.28 | 0.29 | 0.63 | -0.30 ns |
| Hnrpd1        | heterogeneous nuclear ribonucleoprotein D-like                                                 | 50926  | 7.74 | 6.94 | 5.36 | 1.44 | 0.88 *   |
| Supt5h        | suppressor of Ty 5 homolog (S. cerevisiae)                                                     | 20924  | 1.83 | 1.80 | 1.63 | 1.12 | 0.80 ns  |
| Polr2d        | polymerase (RNA) II (DNA directed) polypeptide D                                               | 69241  | 0.81 | 0.78 | 0.91 | 0.88 | 0.26 ns  |
| Zfp672        | zinc finger protein 672                                                                        | 319475 | 0.48 | 0.36 | 0.39 | 1.22 | 0.23 ns  |
| 2810003C17Rik | RIKEN cDNA 2810003C17 gene                                                                     | 108897 | 1.64 | 1.45 | 1.08 | 1.51 | 0.59 ns  |
| Med6          | mediator of RNA polymerase II transcription, subunit 6 homolog (yeast)                         | 69792  | 0.54 | 0.70 | 0.65 | 0.83 | -0.26 ns |
| Smox          | spermine oxidase                                                                               | 228608 | 0.60 | 0.77 | 1.71 | 0.35 | -0.58 ns |
| Trim41        | tripartite motif-containing 41                                                                 | 211007 | 0.81 | 0.91 | 1.03 | 0.78 | -0.73 ns |
| Uchl5ip       | UCHL5 interacting protein                                                                      | 73738  | 0.31 | 0.34 | 0.41 | 0.74 | -0.62 ns |
| Birc5         | baculoviral IAP repeat-containing 5                                                            | 11799  | 3.24 | 3.51 | 4.03 | 0.80 | 0.26 ns  |
| Mospd1        | motile sperm domain containing 1                                                               | 70380  | 0.37 | 0.34 | 0.45 | 0.82 | -0.08 ns |
| Ubap2         | ubiquitin-associated protein 2                                                                 | 68926  | 1.33 | 1.10 | 1.38 | 0.96 | -0.41 ns |
| Jtb           | jumping translocation breakpoint                                                               | 23922  | 2.74 | 3.02 | 2.49 | 1.10 | 0.50 ns  |
| Arl6ip4       | ADP-ribosylation factor-like 6 interacting protein 4                                           | 65105  | 1.66 | 1.62 | 1.78 | 0.93 | -0.01 ns |
| Prkx          | protein kinase, X-linked                                                                       | 19108  | 0.70 | 0.62 | 0.84 | 0.83 | 0.03 ns  |
| Nup93         | nucleoporin 93                                                                                 | 71805  | 1.59 | 1.62 | 2.03 | 0.78 | 0.01 ns  |
| Depdc1a       | DEP domain containing 1a                                                                       | 76131  | 0.68 | 0.82 | 0.96 | 0.70 | -0.59 ns |
| Tmem55a       | transmembrane protein 55A                                                                      | 72519  | 1.02 | 1.21 | 1.06 | 0.96 | -0.16 ns |
| Ppp4r1        | protein phosphatase 4, regulatory subunit 1                                                    | 70351  | 2.11 | 2.00 | 1.44 | 1.46 | 0.88 *   |
| Gclc          | glutamate-cysteine ligase, catalytic subunit                                                   | 14629  | 1.03 | 1.10 | 0.84 | 1.22 | 0.38 ns  |

|               |                                                                                    |        |       |       |       |      |          |
|---------------|------------------------------------------------------------------------------------|--------|-------|-------|-------|------|----------|
| Zfp282        | zinc finger protein 282                                                            | 101095 | 0.32  | 0.24  | 0.28  | 1.14 | 0.26 ns  |
| Gemin6        | gem (nuclear organelle) associated protein 6                                       | 67242  | 0.72  | 0.72  | 0.60  | 1.19 | 0.86 *   |
| Zfp219        | zinc finger protein 219                                                            | 69890  | 0.44  | 0.32  | 0.41  | 1.09 | -0.24 ns |
| Depdc7        | DEP domain containing 7                                                            | 211896 | 1.68  | 0.95  | 0.64  | 2.62 | 0.63 ns  |
| Mocs2         | molybdenum cofactor synthesis 2                                                    | 17434  | 0.80  | 0.96  | 1.25  | 0.64 | -0.76 ns |
| Ndufs7        | NADH dehydrogenase (ubiquinone) Fe-S protein 7                                     | 75406  | 2.68  | 2.31  | 2.28  | 1.17 | 0.28 ns  |
| Pprf3         | PRP3 pre-mRNA processing factor 3 homolog (yeast)                                  | 70767  | 1.38  | 1.39  | 0.99  | 1.39 | 0.84 *   |
| 1110004E09Rik | RIKEN cDNA 1110004E09 gene                                                         | 68001  | 0.41  | 0.44  | 0.60  | 0.68 | -0.90 *  |
| Slc25a19      | solute carrier family 25 (mitochondrial thiamine pyrophosphate carrier), member 19 | 67283  | 0.35  | 0.30  | 0.39  | 0.91 | -0.56 ns |
| 1110067D22Rik | RIKEN cDNA 1110067D22 gene                                                         | 216551 | 1.29  | 1.06  | 1.11  | 1.16 | 0.20 ns  |
| Traf7         | Tnf receptor-associated factor 7                                                   | 224619 | 1.15  | 0.96  | 0.73  | 1.57 | 0.99 *** |
| Rfc4          | replication factor C (activator 1) 4                                               | 106344 | 2.61  | 2.74  | 3.45  | 0.75 | -0.49 ns |
| Noc2l         | nucleolar complex associated 2 homolog (S. cerevisiae)                             | 57741  | 0.48  | 0.42  | 0.44  | 1.09 | -0.05 ns |
| Esco1         | establishment of cohesion 1 homolog 1 (S. cerevisiae)                              | 77805  | 1.01  | 1.27  | 1.04  | 0.96 | 0.41 ns  |
| Lemd2         | LEM domain containing 2                                                            | 224640 | 0.40  | 0.41  | 0.36  | 1.09 | 0.54 ns  |
| 3200002M19Rik | RIKEN cDNA 3200002M19 gene                                                         | 75430  | 0.25  | 0.33  | 0.52  | 0.48 | -0.88 *  |
| Prrg2         | proline-rich Gla (G-carboxylglutamic acid) polypeptide 2                           | 65116  | 0.29  | 0.43  | 0.44  | 0.66 | -0.37 ns |
| Rab40c        | Rab40c, member RAS oncogene family                                                 | 224624 | 1.11  | 1.01  | 0.72  | 1.52 | 0.69 ns  |
| Rg9mtd1       | RNA (guanine-9-) methyltransferase domain containing 1                             | 52575  | 0.39  | 0.44  | 0.54  | 0.71 | -0.77 ns |
| Ppdc          | phosphopantothienoylcysteine decarboxylase                                         | 66812  | 0.51  | 0.34  | 0.35  | 1.47 | 0.61 ns  |
| Snx15         | sorting nexin 15                                                                   | 69024  | 0.60  | 0.51  | 0.62  | 0.96 | -0.10 ns |
| Fytd1         | forty-two-three domain containing 1                                                | 69823  | 1.49  | 1.44  | 2.25  | 0.66 | -0.85 *  |
| Eif1a         | eukaryotic translation initiation factor 1A                                        | 13664  | 1.67  | 2.03  | 1.76  | 0.94 | -0.29 ns |
| Ube2m         | ubiquitin-conjugating enzyme E2M (UBC12 homolog, yeast)                            | 22192  | 0.96  | 1.20  | 1.44  | 0.66 | -0.69 ns |
| Ppp6c         | protein phosphatase 6, catalytic subunit                                           | 67857  | 1.16  | 1.16  | 0.95  | 1.21 | 0.84 *   |
| 1110007A13Rik | RIKEN cDNA 1110007A13 gene                                                         | 210711 | 0.88  | 0.80  | 1.01  | 0.86 | -0.29 ns |
| Lpgat1        | lysophosphatidylglycerol acyltransferase 1                                         | 226856 | 1.21  | 1.00  | 0.84  | 1.42 | 0.51 ns  |
| Wfdc2         | WAP four-disulfide core domain 2                                                   | 67701  | 11.49 | 13.02 | 16.24 | 0.70 | -0.84 *  |
| Lrpprc        | leucine-rich PPR-motif containing                                                  | 72416  | 1.18  | 1.09  | 0.78  | 1.51 | 0.76 ns  |
| Metrn1        | meteorin, glial cell differentiation regulator-like                                | 210029 | 0.30  | 0.32  | 0.43  | 0.70 | -0.15 ns |
| Tmem45b       | transmembrane protein 45b                                                          | 235135 | 1.54  | 1.48  | 0.89  | 1.73 | 0.67 ns  |
| Ube2e2        | ubiquitin-conjugating enzyme E2E 2 (UBC4/5 homolog, yeast)                         | 218793 | 0.53  | 0.57  | 0.53  | 0.98 | 0.30 ns  |
| BC019943      | cDNA sequence BC019943                                                             | 234138 | 0.32  | 0.36  | 0.36  | 0.89 | -0.26 ns |
| 1110020P15Rik | RIKEN cDNA 1110020P15 gene                                                         | 66152  | 2.28  | 2.21  | 2.86  | 0.79 | -0.36 ns |
| 1810037117Rik | RIKEN cDNA 1810037117 gene                                                         | 67704  | 5.08  | 5.06  | 4.69  | 1.08 | 0.18 ns  |
| Dolk          | dolichol kinase                                                                    | 227697 | 0.76  | 0.75  | 0.50  | 1.51 | 0.89 *   |
| Ubqln1        | ubiquilin 1                                                                        | 56085  | 4.44  | 3.60  | 4.52  | 0.98 | 0.05 ns  |
| Mrpl32        | mitochondrial ribosomal protein L32                                                | 75398  | 1.21  | 1.13  | 1.54  | 0.78 | -0.53 ns |
| Cdc42ep1      | CDC42 effector protein (Rho GTPase binding) 1                                      | 104445 | 1.04  | 0.87  | 0.84  | 1.23 | -0.04 ns |
| BC003885      | cDNA sequence BC003885                                                             | 225215 | 1.09  | 1.04  | 0.92  | 1.18 | 0.78 ns  |
| Ldlrap1       | low density lipoprotein receptor adaptor protein 1                                 | 100017 | 0.60  | 0.61  | 0.72  | 0.83 | -0.58 ns |
| Vps37b        | vacuolar protein sorting 37B (yeast)                                               | 330192 | 0.44  | 0.52  | 0.47  | 0.92 | -0.49 ns |
| Sf4           | splicing factor 4                                                                  | 70616  | 1.00  | 1.27  | 0.98  | 1.01 | 0.50 ns  |
| Tmem51        | transmembrane protein 51                                                           | 214359 | 1.10  | 1.29  | 1.14  | 0.95 | 0.44 ns  |
| 5830417110Rik | RIKEN cDNA 5830417110 gene                                                         | 76022  | 0.79  | 0.81  | 0.51  | 1.53 | 0.72 ns  |
| Cluap1        | clusterin associated protein 1                                                     | 76779  | 0.59  | 0.71  | 0.67  | 0.88 | -0.52 ns |
| Nrd1          | nardilysin, N-arginine dibasic convertase, NRD convertase 1                        | 230598 | 1.09  | 0.95  | 1.10  | 0.99 | 0.06 ns  |
| Selm          | selenoprotein M                                                                    | 114679 | 0.32  | 0.41  | 0.26  | 1.24 | 0.49 ns  |
| Dhx36         | DEAH (Asp-Glu-Ala-His) box polypeptide 36                                          | 72162  | 1.49  | 1.32  | 0.88  | 1.68 | 0.46 ns  |
| Uck1          | uridine-cytidine kinase 1                                                          | 22245  | 0.51  | 0.54  | 0.56  | 0.92 | -0.62 ns |
| Mbip          | MAP3K12 binding inhibitory protein 1                                               | 217588 | 0.63  | 0.65  | 0.84  | 0.75 | -0.57 ns |
| Cbx6          | chromobox homolog 6                                                                | 494448 | 4.22  | 4.22  | 4.26  | 0.99 | -0.41 ns |
| Cldn23        | claudin 23                                                                         | 71908  | 0.50  | 0.51  | 0.30  | 1.63 | 0.29 ns  |
| Ttc8          | tetratricopeptide repeat domain 8                                                  | 76260  | 0.65  | 0.68  | 0.49  | 1.32 | 0.43 ns  |
| Nkiras2       | NFKB inhibitor interacting Ras-like protein 2                                      | 71966  | 1.02  | 0.79  | 0.99  | 1.02 | 0.16 ns  |
| Lrrc14        | leucine rich repeat containing 14                                                  | 223664 | 0.52  | 0.57  | 0.91  | 0.57 | -0.69 ns |
| Ccpg1         | cell cycle progression 1                                                           | 72278  | 0.56  | 0.55  | 0.59  | 0.94 | 0.39 ns  |
| Flad1         | RFad1, flavin adenine dinucleotide synthetase, homolog (yeast)                     | 319945 | 0.52  | 0.41  | 0.45  | 1.15 | -0.13 ns |
| Slc39a1       | solute carrier family 39 (zinc transporter), member 1                              | 30791  | 1.29  | 1.73  | 1.25  | 1.03 | 0.32 ns  |
| Mtap          | methylthioadenosine phosphorylase                                                  | 66902  | 1.40  | 1.20  | 1.47  | 0.95 | -0.23 ns |
| Tada1l        | transcriptional adaptor 1 (HFI1 homolog, yeast) like                               | 27878  | 0.33  | 0.38  | 0.24  | 1.36 | 0.31 ns  |
| Mterfd2       | MTERF domain containing 2                                                          | 69821  | 0.63  | 0.57  | 0.42  | 1.49 | 0.42 ns  |
| Ubt1          | ubiquitin domain containing 1                                                      | 226122 | 0.18  | 0.21  | 0.13  | 1.32 | 0.23 ns  |
| BC024814      | cDNA sequence BC024814                                                             | 239706 | 0.29  | 0.44  | 0.38  | 0.76 | -0.39 ns |
| Slc27a4       | solute carrier family 27 (fatty acid transporter), member 4                        | 26569  | 0.72  | 0.87  | 0.83  | 0.86 | -0.68 ns |
| 1700030K09Rik | RIKEN cDNA 1700030K09 gene                                                         | 72254  | 0.43  | 0.45  | 0.47  | 0.89 | 0.01 ns  |
| Gprc5c        | G protein-coupled receptor, family C, group 5, member C                            | 70355  | 1.19  | 1.22  | 0.81  | 1.45 | 0.53 ns  |
| Sltm          | SAFB-like, transcription modulator                                                 | 66660  | 1.23  | 1.21  | 1.15  | 1.07 | 0.68 ns  |
| Tmem87a       | transmembrane protein 87A                                                          | 211499 | 0.43  | 0.31  | 0.09  | 4.59 | 0.38 ns  |
| Gprasp1       | G protein-coupled receptor associated sorting protein 1                            | 67298  | 0.30  | 0.28  | 0.28  | 1.06 | 0.54 ns  |
| Dctn2         | dynactin 2                                                                         | 69654  | 3.66  | 3.26  | 2.72  | 1.34 | 0.68 ns  |
| Ergic2        | ERGIC and golgi 2                                                                  | 67456  | 1.39  | 1.03  | 1.03  | 1.34 | 0.47 ns  |
| 2210010L05Rik | RIKEN cDNA 2210010L05 gene                                                         | 98682  | 2.28  | 2.18  | 1.28  | 1.78 | 0.81 ns  |
| Ccdc58        | coiled-coil domain containing 58                                                   | 381045 | 1.27  | 1.25  | 1.61  | 0.78 | -0.72 ns |
| Phldb1        | pleckstrin homology-like domain, family B, member 1                                | 102693 | 0.52  | 0.57  | 0.42  | 1.22 | 0.54 ns  |
| Cpsf4         | cleavage and polyadenylation specific factor 4                                     | 54188  | 0.82  | 0.66  | 0.61  | 1.35 | 0.80 ns  |
| Rapgfe3       | Rap guanine nucleotide exchange factor (GEF) 3                                     | 223864 | 0.31  | 0.41  | 0.35  | 0.86 | -0.57 ns |
| Polr2h        | polymerase (RNA) II (DNA directed) polypeptide H                                   | 245841 | 1.11  | 1.24  | 1.08  | 1.03 | -0.13 ns |
| Camkk2        | calcium/calmodulin-dependent protein kinase kinase 2, beta                         | 207565 | 1.84  | 1.99  | 1.01  | 1.81 | 0.82 *   |
| Akt2          | thymoma viral proto-oncogene 2                                                     | 11652  | 0.62  | 0.66  | 0.75  | 0.83 | -0.38 ns |
| Mobkl1b       | MOB1, Mps One Binder kinase activator-like 1B (yeast)                              | 232157 | 0.92  | 1.07  | 1.18  | 0.78 | -0.50 ns |
| Ppa2          | pyrophosphatase (inorganic) 2                                                      | 74776  | 1.79  | 1.69  | 1.57  | 1.14 | -0.31 ns |
| Trit1         | tRNA isopentenyltransferase 1                                                      | 66966  | 0.36  | 0.37  | 0.49  | 0.73 | -0.49 ns |
| Utp6          | UTP6, small subunit (SSU) processome component, homolog (yeast)                    | 216987 | 0.76  | 0.76  | 0.66  | 1.13 | 0.34 ns  |
| Oit1          | oncprotein induced transcript 1                                                    | 18300  | 1.03  | 1.57  | 1.54  | 0.67 | -0.74 ns |
| Rin1          | Ras and Rab interactor 1                                                           | 225870 | 0.57  | 0.61  | 0.80  | 0.71 | -0.91 *  |

|               |                                                                                |        |       |       |       |      |          |
|---------------|--------------------------------------------------------------------------------|--------|-------|-------|-------|------|----------|
| Ttc5          | tetratricopeptide repeat domain 5                                              | 219022 | 1.22  | 0.98  | 1.10  | 1.10 | -0.07 ns |
| Aurka         | aurora kinase A                                                                | 20878  | 1.53  | 1.49  | 2.16  | 0.71 | -0.55 ns |
| Rnf126        | ring finger protein 126                                                        | 70294  | 1.60  | 1.20  | 1.45  | 1.10 | 0.28 ns  |
| Mtg1          | mitochondrial GTPase 1 homolog (S. cerevisiae)                                 | 212508 | 0.32  | 0.33  | 0.38  | 0.83 | -0.44 ns |
| 2010305A19Rik | RIKEN cDNA 2010305A19 gene                                                     | 69893  | 0.27  | 0.29  | 0.39  | 0.69 | -0.58 ns |
| Heatr1        | HEAT repeat containing 1                                                       | 217995 | 0.82  | 0.88  | 0.86  | 0.95 | -0.29 ns |
| Tgds          | TDP-glucose 4,6-dehydratase                                                    | 76355  | 0.41  | 0.35  | 0.42  | 0.97 | 0.15 ns  |
| Ylpm1         | YLP motif containing 1                                                         | 56531  | 1.15  | 1.14  | 1.07  | 1.07 | 0.85 *   |
| Ubi4          | ubiquitin-like 4                                                               | 27643  | 0.62  | 0.63  | 0.99  | 0.63 | -0.58 ns |
| Hipk1         | homeodomain interacting protein kinase 1                                       | 15257  | 2.84  | 2.06  | 1.81  | 1.56 | 0.38 ns  |
| Tmem70        | transmembrane protein 70                                                       | 70397  | 0.89  | 0.92  | 1.08  | 0.81 | -0.73 ns |
| S100a4        | S100 calcium binding protein A4                                                | 20198  | 0.59  | 0.80  | 0.70  | 0.84 | -0.43 ns |
| Nrbp2         | nuclear receptor binding protein 2                                             | 223649 | 0.69  | 0.52  | 0.36  | 1.91 | -0.04 ns |
| BC003965      | cDNA sequence BC003965                                                         | 214489 | 1.91  | 1.56  | 1.09  | 1.74 | 0.96 **  |
| Degs2         | degenerative spermatocyte homolog 2 (Drosophila), lipid desaturase             | 70059  | 0.25  | 0.27  | 0.64  | 0.40 | -0.61 ns |
| Casp8         | caspase 8                                                                      | 12370  | 1.69  | 1.57  | 1.51  | 1.12 | 0.08 ns  |
| Ppp1r8        | protein phosphatase 1, regulatory (inhibitor) subunit 8                        | 100336 | 0.80  | 0.77  | 0.82  | 0.98 | -0.35 ns |
| 9430015G10Rik | RIKEN cDNA 9430015G10 gene                                                     | 230996 | 0.33  | 0.32  | 0.44  | 0.76 | -0.54 ns |
| Zcchc9        | zinc finger, CCHC domain containing 9                                          | 69085  | 0.45  | 0.53  | 0.70  | 0.65 | -0.76 ns |
| H2afy         | H2A histone family, member Y                                                   | 26914  | 3.06  | 2.98  | 3.32  | 0.92 | 0.07 ns  |
| Tmed5         | transmembrane emp24 protein transport domain containing 5                      | 73130  | 2.51  | 2.82  | 2.85  | 0.88 | -0.87 *  |
| Rabl5         | RAB, member of RAS oncogene family-like 5                                      | 67286  | 0.73  | 0.85  | 0.75  | 0.97 | -0.05 ns |
| Msto1         | misato homolog 1 (Drosophila)                                                  | 229524 | 0.90  | 1.00  | 0.63  | 1.41 | 0.31 ns  |
| Arndc1        | arrestin domain containing 1                                                   | 215705 | 1.38  | 1.29  | 0.90  | 1.52 | 0.71 ns  |
| Ranbp10       | RAN binding protein 10                                                         | 74334  | 0.92  | 0.70  | 0.87  | 1.05 | 0.41 ns  |
| Ehbp1         | EH domain binding protein 1                                                    | 216565 | 0.38  | 0.34  | 0.41  | 0.92 | -0.49 ns |
| Ddx19b        | DEAD (Asp-Glu-Ala-Asp) box polypeptide 19b                                     | 234733 | 0.33  | 0.35  | 0.31  | 1.06 | 0.51 ns  |
| 5830433M19Rik | RIKEN cDNA 5830433M19 gene                                                     | 67770  | 0.40  | 0.45  | 0.55  | 0.72 | -0.78 ns |
| Lgals7        | lectin, galactose binding, soluble 7                                           | 16858  | 1.00  | 0.92  | 0.70  | 1.43 | 0.82 *   |
| F11r          | F11 receptor                                                                   | 16456  | 3.41  | 3.60  | 2.85  | 1.19 | 0.02 ns  |
| ORF19         | open reading frame 19                                                          | 68767  | 0.66  | 0.60  | 0.45  | 1.47 | 0.92 *   |
| Ddx6          | DEAD (Asp-Glu-Ala-Asp) box polypeptide 6                                       | 13209  | 0.43  | 0.43  | 0.30  | 1.44 | 0.60 ns  |
| Xrcc4         | X-ray repair complementing defective repair in Chinese hamster cells 4         | 108138 | 0.22  | 0.38  | 0.51  | 0.44 | -0.91 *  |
| Sumf1         | sulfatase modifying factor 1                                                   | 58911  | 0.68  | 1.15  | 1.20  | 0.56 | -0.86 *  |
| BC003993      |                                                                                | 80744  | 2.97  | 3.93  | 3.05  | 0.97 | -0.05 ns |
| LOC544818     |                                                                                | 544818 | 2.97  | 3.93  | 3.05  | 0.97 | -0.05 ns |
| Trub2         | TruB pseudouridine (psi) synthase homolog 2 (E. coli)                          | 227682 | 0.61  | 0.72  | 0.56  | 1.10 | -0.12 ns |
| Npal2         | NIPA-like domain containing 2                                                  | 223473 | 0.09  | 0.11  | 0.47  | 0.18 | -0.72 ns |
| Frag1         | FGF receptor activating protein 1                                              | 233575 | 1.06  | 0.89  | 0.76  | 1.38 | 0.19 ns  |
| EG666113      |                                                                                | 666113 | 4.18  | 3.78  | 3.23  | 1.29 | 0.46 ns  |
| Sf3b4         |                                                                                | 107701 | 4.18  | 3.78  | 3.23  | 1.29 | 0.46 ns  |
| D13Wsu177e    | DNA segment, Chr 13, Wayne State University 177, expressed                     | 28126  | 0.83  | 0.86  | 1.02  | 0.80 | -0.48 ns |
| Krcc1         | lysine-rich coiled-coil 1                                                      | 57896  | 0.94  | 1.08  | 1.23  | 0.76 | -0.48 ns |
| Hsf1          | heat shock factor 1                                                            | 15499  | 0.62  | 0.56  | 0.67  | 0.92 | -0.02 ns |
| Dennd1a       | DENN/MADD domain containing 1A                                                 | 227801 | 0.46  | 0.36  | 0.24  | 1.89 | 0.87 *   |
| 1500032D16Rik | RIKEN cDNA 1500032D16 gene                                                     | 78330  | 3.61  | 3.59  | 3.15  | 1.14 | 0.79 ns  |
| Brc1          | breast cancer 1                                                                | 12189  | 1.87  | 1.64  | 2.19  | 0.85 | 0.21 ns  |
| Rev3l         | REV3-like, catalytic subunit of DNA polymerase zeta RAD54 like (S. cerevisiae) | 19714  | 4.19  | 3.22  | 2.36  | 1.77 | 0.52 ns  |
| Eef1a1        | eukaryotic translation elongation factor 1 alpha 1                             | 13627  | 33.05 | 29.14 | 23.87 | 1.38 | 0.91 *   |
| Cdkn1a        | cyclin-dependent kinase inhibitor 1A (P21)                                     | 12575  | 3.61  | 3.49  | 3.91  | 0.92 | -0.58 ns |
| Hmgcl         | 3-hydroxy-3-methylglutaryl-Coenzyme A lyase                                    | 15356  | 0.33  | 0.31  | 0.50  | 0.66 | -0.57 ns |
| Arl8a         | ADP-ribosylation factor-like 8A                                                | 68724  | 0.35  | 0.39  | 0.28  | 1.25 | 0.26 ns  |
| Thoc1         | THO complex 1                                                                  | 225160 | 0.67  | 1.00  | 0.79  | 0.85 | 0.03 ns  |
| Tcof1         | Treacher Collins Franceschetti syndrome 1, homolog                             | 21453  | 0.48  | 0.60  | 0.65  | 0.73 | 0.06 ns  |
| Tbcc          | tubulin-specific chaperone c                                                   | 72726  | 0.51  | 0.47  | 0.39  | 1.29 | 0.94 **  |
| Tnrc6c        | trinucleotide repeat containing 6C                                             | 217351 | 0.96  | 1.04  | 0.74  | 1.29 | 0.70 ns  |
| Uck1          | uridine-cytidine kinase 1-like 1                                               | 68556  | 0.39  | 0.41  | 0.60  | 0.65 | -0.91 *  |
| Tspan8        | tetraspanin 8                                                                  | 216350 | 6.26  | 7.17  | 7.15  | 0.87 | -0.74 ns |
| Pdia5         | protein disulfide isomerase associated 5                                       | 72599  | 0.40  | 0.41  | 0.41  | 0.96 | 0.37 ns  |
| Acp2          | acid phosphatase 2, lysosomal                                                  | 11432  | 0.50  | 0.49  | 0.41  | 1.22 | 0.88 *   |
| Slit2         | slit homolog 2 (Drosophila)                                                    | 20563  | 1.07  | 0.92  | 1.00  | 1.06 | -0.36 ns |
| Pmpca         | peptidase (mitochondrial processing) alpha                                     | 66865  | 1.43  | 1.47  | 1.24  | 1.15 | 0.39 ns  |
| Zfyve21       | zinc finger, FYVE domain containing 21                                         | 68520  | 1.22  | 1.33  | 1.46  | 0.84 | -0.07 ns |
| Plekhf1       | pleckstrin homology domain containing, family F (with FYVE domain) member 1    | 72287  | 0.76  | 0.75  | 0.73  | 1.04 | 0.41 ns  |
| Dmx1          | Dmx-like 1                                                                     | 240283 | 0.27  | 0.44  | 0.44  | 0.62 | -0.80 ns |
| Slc39a6       | solute carrier family 39 (metal ion transporter), member 6                     | 106957 | 1.19  | 1.54  | 1.48  | 0.80 | -0.06 ns |
| Rab5c         | RAB5C, member RAS oncogene family                                              | 19345  | 2.27  | 2.17  | 2.50  | 0.90 | -0.26 ns |
| Exosc4        | exosome component 4                                                            | 109075 | 0.91  | 0.88  | 0.99  | 0.91 | -0.16 ns |
| Gpr89         | G protein-coupled receptor 89                                                  | 67549  | 0.88  | 0.90  | 0.70  | 1.24 | -0.05 ns |
| Dtw1          | DTW domain containing 1                                                        | 69185  | 0.66  | 0.53  | 0.51  | 1.30 | 0.50 ns  |
| Gca           | grancalcin                                                                     | 227960 | 0.37  | 0.45  | 0.31  | 1.18 | 0.36 ns  |
| 4921511K06Rik | RIKEN cDNA 4921511K06 gene                                                     | 232664 | 0.41  | 0.50  | 0.28  | 1.47 | 0.67 ns  |
| Rbmx2         | RNA binding motif protein, X-linked 2                                          | 209003 | 0.27  | 0.33  | 0.54  | 0.49 | -0.41 ns |
| Zfp51         | zinc finger protein 51                                                         | 22709  | 0.29  | 0.36  | 0.25  | 1.15 | 0.35 ns  |
| Tmed10        | transmembrane emp24-like trafficking protein 10 (yeast)                        | 68581  | 3.64  | 3.47  | 4.56  | 0.79 | -0.38 ns |
| Gorasp2       | golgi reassembly stacking protein 2                                            | 70231  | 2.03  | 1.99  | 1.52  | 1.33 | 0.87 *   |
| Tmem2         | transmembrane protein 2                                                        | 83921  | 0.79  | 0.89  | 0.90  | 0.88 | -0.67 ns |
| Ahctf1        | AT hook containing transcription factor 1                                      | 226747 | 1.62  | 1.57  | 1.29  | 1.25 | 0.69 ns  |
| Calml4        | calmodulin-like 4                                                              | 75600  | 0.81  | 0.26  | 0.13  | 6.36 | 0.74 ns  |
| Retsat        | retinol saturase (all trans retinol 13,14 reductase)                           | 67442  | 0.39  | 0.33  | 0.36  | 1.07 | 0.28 ns  |
| Mis12         | MIS12 homolog (yeast)                                                          | 67139  | 0.57  | 0.62  | 0.86  | 0.65 | -0.78 ns |
| Mapt          | microtubule-associated protein tau                                             | 17762  | 0.15  | 0.34  | 0.47  | 0.33 | -0.24 ns |
| Mgat4b        | mannoside acetylglucosaminyltransferase 4, isoenzyme B                         | 103534 | 2.20  | 2.32  | 2.85  | 0.77 | -0.86 *  |
| Mfap3         | microfibrillar-associated protein 3                                            | 216760 | 1.72  | 1.70  | 1.71  | 1.00 | 0.07 ns  |
| Cstf3         | cleavage stimulation factor, 3' pre-RNA, subunit 3                             | 228410 | 1.25  | 0.97  | 0.95  | 1.31 | 0.66 ns  |



|               |                                                                                                                |        |       |       |       |      |          |
|---------------|----------------------------------------------------------------------------------------------------------------|--------|-------|-------|-------|------|----------|
| BC011248      | cDNA sequence BC011248                                                                                         | 224823 | 0.78  | 0.79  | 0.57  | 1.35 | 0.87 *   |
| Eef2          | eukaryotic translation elongation factor 2                                                                     | 13629  | 19.59 | 17.31 | 14.25 | 1.37 | 0.57 ns  |
| Creb3         | cAMP responsive element binding protein 3                                                                      | 12913  | 0.81  | 0.77  | 0.78  | 1.04 | 0.17 ns  |
| Kif1c         | kinesin family member 1C                                                                                       | 16562  | 1.73  | 1.88  | 2.19  | 0.78 | -0.66 ns |
| Zbtb1         | zinc finger and BTB domain containing 1                                                                        | 268564 | 0.66  | 0.63  | 0.88  | 0.75 | -0.87 *  |
| Abt1          | activator of basal transcription                                                                               | 30946  | 0.71  | 0.82  | 0.78  | 0.91 | -0.22 ns |
| Zfp71-rs1     | zinc finger protein 71, related sequence 1                                                                     | 235907 | 0.53  | 0.81  | 0.72  | 0.73 | -0.62 ns |
| Nudt14        | nudix (nucleoside diphosphate linked moiety X)-type motif 14                                                   | 66174  | 1.25  | 1.27  | 1.55  | 0.80 | -0.27 ns |
| Smyd2         | SET and MYND domain containing 2                                                                               | 226830 | 0.58  | 0.88  | 0.51  | 1.13 | 0.07 ns  |
| 1700027N10Rik | RIKEN cDNA 1700027N10 gene                                                                                     | 75564  | 0.31  | 0.38  | 0.22  | 1.40 | 0.07 ns  |
| Ercc6l        | excision repair cross-complementing rodent repair deficiency complementation group 6 - like caldesmon 1        | 236930 | 0.90  | 0.82  | 1.30  | 0.69 | -0.09 ns |
| Cald1         | caldesmon 1                                                                                                    | 109624 | 6.32  | 5.66  | 4.56  | 1.38 | 0.25 ns  |
| H2afj         |                                                                                                                | 232440 | 1.11  | 1.02  | 1.26  | 0.87 | -0.59 ns |
| Slc25a28      | solute carrier family 25, member 28                                                                            | 246696 | 0.75  | 0.82  | 0.66  | 1.12 | 0.32 ns  |
| Wdr21         | WD repeat domain 21                                                                                            | 73828  | 0.55  | 0.39  | 0.85  | 0.64 | -0.63 ns |
| Reep3         | receptor accessory protein 3                                                                                   | 28193  | 4.10  | 5.23  | 3.44  | 1.18 | -0.04 ns |
| Wdr45         | WD repeat domain 45                                                                                            | 54636  | 0.61  | 0.62  | 0.84  | 0.72 | -0.33 ns |
| Bcam          | basal cell adhesion molecule                                                                                   | 57278  | 1.76  | 2.08  | 2.16  | 0.81 | -0.66 ns |
| Rnf186        | ring finger protein 186                                                                                        | 66825  | 0.33  | 0.29  | 0.64  | 0.51 | -0.82 *  |
| Enah          | enabled homolog (Drosophila)                                                                                   | 13800  | 3.32  | 3.58  | 2.63  | 1.25 | -0.31 ns |
| 3300001P08Rik | RIKEN cDNA 3300001P08 gene                                                                                     | 67684  | 3.32  | 3.31  | 3.00  | 1.10 | 0.49 ns  |
| Ndfip1        | Nedd4 family interacting protein 1                                                                             | 65113  | 2.44  | 2.84  | 3.19  | 0.76 | -0.18 ns |
| Slain1        | SLAIN motif family, member 1                                                                                   | 105439 | 0.47  | 0.53  | 0.48  | 0.97 | -0.41 ns |
| Csnk1a1       | casein kinase 1, alpha 1                                                                                       | 93687  | 4.49  | 4.74  | 4.37  | 1.02 | 0.29 ns  |
| Fh1           | fumarate hydratase 1                                                                                           | 14194  | 2.83  | 2.43  | 1.93  | 1.46 | 0.73 ns  |
| A830007P12Rik | RIKEN cDNA A830007P12 gene                                                                                     | 227612 | 0.58  | 0.43  | 0.41  | 1.43 | 0.74 ns  |
| Ccnk          | cyclin K                                                                                                       | 12454  | 0.35  | 0.28  | 0.40  | 0.86 | 0.00 ns  |
| Cpne2         | copine II                                                                                                      | 234577 | 0.23  | 0.15  | 0.40  | 0.59 | -0.66 ns |
| Itp2          | inositol 1,4,5-triphosphate receptor 2                                                                         | 16439  | 0.58  | 0.70  | 0.79  | 0.74 | -0.86 *  |
| Clasp2        | CLIP associating protein 2                                                                                     | 76499  | 0.66  | 0.80  | 0.84  | 0.78 | -0.07 ns |
| Arhgap24      | Rho GTPase activating protein 24                                                                               | 231532 | 1.36  | 0.97  | 0.38  | 3.55 | 0.35 ns  |
| Angel1        | angel homolog 1 (Drosophila)                                                                                   | 68737  | 1.03  | 1.13  | 1.91  | 0.53 | -0.61 ns |
| Map3k1        |                                                                                                                | 26401  | 0.52  | 0.79  | 1.05  | 0.50 | -0.93 ** |
| L2hgdh        | L-2-hydroxyglutarate dehydrogenase                                                                             | 217666 | 0.55  | 0.56  | 0.62  | 0.88 | -0.46 ns |
| D930016D06Rik | RIKEN cDNA D930016D06 gene                                                                                     | 100662 | 0.33  | 0.39  | 0.34  | 0.98 | 0.25 ns  |
| Mib2          | mindbomb homolog 2 (Drosophila)                                                                                | 76580  | 0.35  | 0.29  | 0.41  | 0.85 | -0.16 ns |
| Dhrs7b        | dehydrogenase/reductase (SDR family) member 7B                                                                 | 216820 | 0.58  | 0.59  | 0.71  | 0.81 | -0.30 ns |
| 1500031H01Rik | RIKEN cDNA 1500031H01 gene                                                                                     | 207740 | 0.47  | 0.35  | 0.52  | 0.91 | -0.48 ns |
| LOC666849     |                                                                                                                | 666849 | 0.63  | 0.62  | 0.52  | 1.22 | 0.53 ns  |
| Rnf2          | ring finger protein 2                                                                                          | 19821  | 1.67  | 1.81  | 1.65  | 1.01 | -0.47 ns |
| Ptbp1         | polypyrimidine tract binding protein 1                                                                         | 19205  | 7.28  | 6.70  | 6.15  | 1.18 | 0.40 ns  |
| Spg20         | spastic paraplegia 20, spartin (Troyer syndrome) homolog (human)                                               | 229285 | 0.82  | 0.76  | 0.61  | 1.33 | 0.82 *   |
| Alad          | aminolevulinatase, delta-, dehydratase                                                                         | 17025  | 2.56  | 2.83  | 2.69  | 0.95 | -0.13 ns |
| Sap25         | mSin3A-binding protein                                                                                         | 751865 | 0.39  | 0.30  | 0.30  | 1.29 | -0.06 ns |
| Trib1         | tribbles homolog 1 (Drosophila)                                                                                | 211770 | 0.42  | 0.43  | 0.47  | 0.89 | -0.27 ns |
| Nt5dc2        | 5'-nucleotidase domain containing 2                                                                            | 70021  | 0.49  | 0.58  | 0.41  | 1.21 | 0.64 ns  |
| Sfrs7         | splicing factor, arginine/serine-rich 7                                                                        | 225027 | 5.24  | 5.55  | 5.23  | 1.00 | 0.25 ns  |
| Klhdca8a      | kelch domain containing 8A                                                                                     | 213417 | 0.98  | 0.90  | 0.55  | 1.77 | 0.72 ns  |
| Klhdca4       | kelch domain containing 4                                                                                      | 234825 | 0.27  | 0.34  | 0.28  | 0.95 | 0.34 ns  |
| March2        | membrane-associated ring finger (C3HC4) 2                                                                      | 224703 | 0.67  | 0.58  | 0.39  | 1.71 | 0.97 *** |
| Zw10          | ZW10 homolog (Drosophila), centromere/kinetochore protein                                                      | 26951  | 1.17  | 1.21  | 1.01  | 1.15 | 0.72 ns  |
| Rab13         | RAB13, member RAS oncogene family                                                                              | 68328  | 0.69  | 0.86  | 0.60  | 1.15 | 0.57 ns  |
| Gpsm2         | G-protein signalling modulator 2 (AGS3-like, C. elegans)                                                       | 76123  | 0.93  | 1.18  | 1.17  | 0.80 | -0.10 ns |
| Slc39a11      | solute carrier family 39 (metal ion transporter), member 11                                                    | 69806  | 0.40  | 0.42  | 0.35  | 1.11 | 0.70 ns  |
| Farsa         | phenylalanyl-tRNA synthetase, alpha subunit                                                                    | 66590  | 0.77  | 0.69  | 0.65  | 1.18 | 0.74 ns  |
| Slc25a17      | solute carrier family 25 (mitochondrial carrier, peroxisomal membrane protein), member 17                      | 20524  | 0.74  | 0.52  | 0.71  | 1.03 | 0.00 ns  |
| 2310044G17Rik | RIKEN cDNA 2310044G17 gene                                                                                     | 217732 | 0.81  | 0.65  | 1.18  | 0.68 | -0.78 ns |
| 2310044G17Rik | RIKEN cDNA 2310044G17 gene                                                                                     | 217732 | 2.60  | 2.05  | 3.55  | 0.73 | -0.64 ns |
| 2310044G17Rik | RIKEN cDNA 2310044G17 gene                                                                                     | 217732 | 6.96  | 5.75  | 8.83  | 0.78 | -0.66 ns |
| Zfp764        | zinc finger protein 764                                                                                        | 233893 | 0.23  | 0.33  | 0.39  | 0.58 | -0.88 *  |
| Tbc1d19       | TBC1 domain family, member 19                                                                                  | 67249  | 0.87  | 0.75  | 0.75  | 1.15 | 0.39 ns  |
| ErbB2         | v-erb-b2 erythroblastic leukemia viral oncogene homolog 2, neuro/glioblastoma derived oncogene homolog (avian) | 13866  | 1.70  | 1.32  | 1.51  | 1.12 | 0.04 ns  |
| Bst2          |                                                                                                                | 69550  | 0.17  | 0.27  | 1.65  | 0.10 | -0.63 ns |
| 2210018M11Rik | RIKEN cDNA 2210018M11 gene                                                                                     | 233545 | 0.49  | 0.53  | 0.61  | 0.79 | -0.68 ns |
| Trim26        | tripartite motif protein 26                                                                                    | 22670  | 0.40  | 0.42  | 0.29  | 1.36 | 0.63 ns  |
| Egfr          | epidermal growth factor receptor                                                                               | 13649  | 0.90  | 1.00  | 0.75  | 1.19 | 0.40 ns  |
| Myo5c         | myosin VC                                                                                                      | 208943 | 0.70  | 0.68  | 0.68  | 1.03 | -0.47 ns |
| BC022687      | cDNA sequence BC022687                                                                                         | 217887 | 0.43  | 0.35  | 0.28  | 1.54 | 0.43 ns  |
| Myc           | myelocytomatosis oncogene                                                                                      | 17869  | 1.86  | 1.68  | 1.51  | 1.22 | -0.03 ns |
| Dync1li1      | dynein cytoplasmic 1 light intermediate chain 1                                                                | 235661 | 0.58  | 0.54  | 0.69  | 0.84 | -0.36 ns |
| Baiap211      | BAI1-associated protein 2-like 1                                                                               | 66898  | 0.70  | 0.67  | 0.80  | 0.88 | -0.79 ns |
| Ccdc5         | coiled-coil domain containing 5                                                                                | 225745 | 1.24  | 1.30  | 1.40  | 0.88 | 0.29 ns  |
| Epn3          | epsin 3                                                                                                        | 71889  | 1.12  | 0.99  | 0.80  | 1.38 | 0.53 ns  |
| Purg          | purine-rich element binding protein G                                                                          | 75029  | 0.29  | 0.32  | 0.40  | 0.72 | -0.27 ns |
| Ccdc99        | coiled-coil domain containing 99                                                                               | 70385  | 0.52  | 0.56  | 0.68  | 0.77 | 0.08 ns  |
| Aph1a         | anterior pharynx defective 1a homolog (C. elegans)                                                             | 226548 | 1.95  | 1.64  | 1.70  | 1.14 | 0.44 ns  |
| Myliip        | myosin regulatory light chain interacting protein                                                              | 218203 | 0.96  | 1.03  | 0.72  | 1.32 | -0.09 ns |
| Tyms          |                                                                                                                | 22171  | 1.19  | 1.20  | 1.54  | 0.77 | -0.48 ns |
| 8430410K20Rik | RIKEN cDNA 8430410K20 gene                                                                                     | 78100  | 1.70  | 1.24  | 0.57  | 2.98 | 0.95 **  |
| Cflar         | CASP8 and FADD-like apoptosis regulator                                                                        | 12633  | 0.33  | 0.36  | 0.32  | 1.05 | -0.41 ns |
| Vrk1          | vaccinia related kinase 1                                                                                      | 22367  | 1.40  | 1.33  | 1.61  | 0.86 | -0.09 ns |
| Stx18         | syntaxin 18                                                                                                    | 71116  | 0.55  | 0.66  | 0.78  | 0.71 | -0.75 ns |
| Ephb2         | Eph receptor B2                                                                                                | 13844  | 0.49  | 0.42  | 0.56  | 0.88 | -0.57 ns |
| Mcts1         | malignant T cell amplified sequence 1                                                                          | 68995  | 0.56  | 0.63  | 0.98  | 0.57 | -0.60 ns |

|               |                                                                                            |        |       |       |       |      |           |
|---------------|--------------------------------------------------------------------------------------------|--------|-------|-------|-------|------|-----------|
| EG621629      |                                                                                            | 621629 | 3.32  | 3.42  | 4.03  | 0.82 | -0.54 ns  |
| Pex16         | peroxisome biogenesis factor 16                                                            | 18633  | 0.43  | 0.27  | 0.33  | 1.28 | 0.16 ns   |
| Usp3          | ubiquitin specific peptidase 3                                                             | 235441 | 0.75  | 0.60  | 0.84  | 0.89 | 0.05 ns   |
| Mboat2        | membrane bound O-acyltransferase domain containing 2                                       | 67216  | 1.70  | 1.50  | 1.33  | 1.27 | 0.22 ns   |
| Pelp1         | proline, glutamic acid and leucine rich protein 1                                          | 75273  | 1.01  | 0.92  | 0.97  | 1.04 | 0.08 ns   |
| Pla2g4b       | phospholipase A2, group IVB (cytosolic)                                                    | 211429 | 0.49  | 0.36  | 0.32  | 1.51 | 0.55 ns   |
| Isoc1         | Isochorismatase domain containing 1                                                        | 66307  | 0.58  | 0.85  | 0.47  | 1.23 | 0.41 ns   |
| 251006D16Rik  | RIKEN cDNA 251006D16 gene                                                                  | 76799  | 1.18  | 1.07  | 1.18  | 1.00 | 0.31 ns   |
| Zfp472        | zinc finger protein 472                                                                    | 224691 | 0.58  | 0.46  | 0.35  | 1.65 | 0.74 ns   |
| Mtmr14        | myotubularin related protein 14                                                            | 97287  | 0.73  | 0.70  | 0.77  | 0.95 | -0.40 ns  |
| Tex264        | testis expressed gene 264                                                                  | 21767  | 1.08  | 0.81  | 0.81  | 1.32 | 0.86 *    |
| Scnn1a        | sodium channel, nonvoltage-gated, type I, alpha                                            | 20276  | 0.39  | 0.45  | 0.28  | 1.41 | 0.13 ns   |
| BC004728      | cDNA sequence BC004728                                                                     | 207818 | 2.31  | 1.96  | 2.11  | 1.09 | -0.10 ns  |
| Slc44a3       | solute carrier family 44, member 3                                                         | 213603 | 1.02  | 1.04  | 1.04  | 0.98 | 0.47 ns   |
| Spire2        | spire homolog 2 (Drosophila)                                                               | 234857 | 0.46  | 0.62  | 0.33  | 1.39 | 0.42 ns   |
| Taldo1        | transaldolase 1                                                                            | 21351  | 1.67  | 1.99  | 2.85  | 0.59 | -0.85 *   |
| Pigx          | phosphatidylinositol glycan anchor biosynthesis, class X                                   | 72084  | 1.42  | 1.37  | 1.59  | 0.89 | -0.50 ns  |
| Lactb2        | lactamase, beta 2                                                                          | 212442 | 0.37  | 0.40  | 0.38  | 0.96 | -0.29 ns  |
| Ndufs1        | NADH dehydrogenase (ubiquinone) Fe-S protein 1                                             | 227197 | 1.49  | 1.37  | 1.20  | 1.23 | -0.05 ns  |
| Pdcl          | phosducin-like                                                                             | 67466  | 1.08  | 1.23  | 1.04  | 1.03 | -0.27 ns  |
| Trabd         | TraB domain containing                                                                     | 67976  | 0.54  | 0.49  | 0.61  | 0.87 | -0.26 ns  |
| AI661453      | expressed sequence AI661453                                                                | 224833 | 1.41  | 1.32  | 1.01  | 1.39 | 0.84 *    |
| Golph3l       | golgi phosphoprotein 3-like                                                                | 229593 | 0.49  | 0.49  | 0.46  | 1.06 | -0.16 ns  |
| Shmt1         | serine hydroxymethyltransferase 1 (soluble)                                                | 20425  | 0.81  | 0.77  | 0.86  | 0.94 | -0.32 ns  |
| Rpl4          | ribosomal protein L4                                                                       | 67891  | 26.16 | 22.93 | 19.23 | 1.35 | 0.93 **   |
| Mrp15         | mitochondrial ribosomal protein L15                                                        | 27395  | 1.40  | 1.29  | 1.01  | 1.38 | 0.69 ns   |
| Phospho2      | phosphatase, orphan 2                                                                      | 73373  | 0.32  | 0.34  | 0.30  | 1.04 | -0.10 ns  |
| 6330577E15Rik | RIKEN cDNA 6330577E15 gene                                                                 | 67788  | 3.65  | 3.69  | 2.96  | 1.23 | 0.54 ns   |
| Acat3         |                                                                                            | 224530 | 1.64  | 1.18  | 1.19  | 1.37 | 0.71 ns   |
| Hint2         | histidine triad nucleotide binding protein 2                                               | 68917  | 0.48  | 0.51  | 0.47  | 1.01 | 0.44 ns   |
| Epb4.115      | erythrocyte protein band 4.1-like 5                                                        | 226352 | 2.17  | 1.90  | 1.06  | 2.04 | 0.53 ns   |
| 6430514L14Rik | RIKEN cDNA 6430514L14 gene                                                                 | 76886  | 0.50  | 0.35  | 0.27  | 1.88 | 0.87 *    |
| Dguok         | deoxyguanosine kinase                                                                      | 27369  | 0.53  | 0.63  | 0.68  | 0.78 | -0.25 ns  |
| Zfp46         | zinc finger protein 46                                                                     | 22704  | 0.44  | 0.35  | 0.44  | 1.00 | 0.19 ns   |
| Wsb1          | WD repeat and SOCS box-containing 1                                                        | 78889  | 2.14  | 2.70  | 2.15  | 0.99 | -0.42 ns  |
| Rgs11         | regulator of G-protein signaling 11                                                        | 50782  | 0.78  | 0.58  | 0.36  | 2.15 | 0.94 **   |
| Mad11         | mitotic arrest deficient 1-like 1                                                          | 17120  | 0.31  | 0.39  | 0.25  | 1.23 | 0.26 ns   |
| Hnrpl         | heterogeneous nuclear ribonucleoprotein L-like                                             | 72692  | 3.13  | 2.86  | 2.55  | 1.22 | 0.96 **   |
| Cebpg         | CCAAT/enhancer binding protein (C/EBP), gamma                                              | 12611  | 0.82  | 1.17  | 1.46  | 0.56 | -0.77 ns  |
| Mbp           | myelin basic protein                                                                       | 17196  | 0.92  | 0.92  | 0.81  | 1.13 | 0.31 ns   |
| Pmpip1        | prion protein interacting protein 1                                                        | 140546 | 0.72  | 0.80  | 0.73  | 0.99 | -0.40 ns  |
| Rap1gds1      | RAP1, GTP-GDP dissociation stimulator 1                                                    | 229877 | 1.12  | 1.21  | 1.19  | 0.94 | -0.25 ns  |
| Rgs3          |                                                                                            | 50780  | 0.34  | 0.38  | 0.28  | 1.20 | 0.44 ns   |
| 0610038D11Rik |                                                                                            | 67674  | 10.03 | 8.04  | 6.54  | 1.53 | 0.94 **   |
| EG665860      |                                                                                            | 665860 | 10.03 | 8.04  | 6.54  | 1.53 | 0.94 **   |
| LOC623390     |                                                                                            | 623390 | 10.03 | 8.04  | 6.54  | 1.53 | 0.94 **   |
| LOC627985     |                                                                                            | 627985 | 10.03 | 8.04  | 6.54  | 1.53 | 0.94 **   |
| BC008163      | cDNA sequence BC008163                                                                     | 230789 | 0.49  | 0.58  | 0.77  | 0.64 | -0.74 ns  |
| Zfp106        | zinc finger protein 106                                                                    | 20402  | 2.18  | 1.51  | 1.47  | 1.47 | 0.48 ns   |
| H2-K1         | histocompatibility 2, K1, K region                                                         | 14972  | 3.30  | 3.34  | 4.30  | 0.76 | 0.14 ns   |
| Ptptra        | protein tyrosine phosphatase, receptor type, A                                             | 19262  | 1.37  | 1.41  | 1.71  | 0.80 | -0.27 ns  |
| Srprb         | signal recognition particle receptor, B subunit                                            | 20818  | 0.58  | 0.51  | 0.57  | 1.01 | 0.53 ns   |
| Myef2         | myelin basic protein expression factor 2, repressor                                        | 17876  | 1.36  | 1.04  | 1.17  | 1.15 | 0.20 ns   |
| Aggf1         | angiogenic factor with G patch and FHA domains 1                                           | 66549  | 0.90  | 1.29  | 1.60  | 0.56 | -0.38 ns  |
| Slc3a2        | solute carrier family 3 (activators of dibasic and neutral amino acid transport), member 2 | 17254  | 5.05  | 4.59  | 3.79  | 1.33 | 0.74 ns   |
| Tpk1          | thiamine pyrophosphokinase                                                                 | 29807  | 0.51  | 0.40  | 0.31  | 1.65 | 0.66 ns   |
| Raf1          | v-raf-leukemia viral oncogene 1                                                            | 110157 | 1.76  | 1.66  | 2.03  | 0.87 | -0.43 ns  |
| Churc1        | churchill domain containing 1                                                              | 211151 | 1.94  | 2.08  | 2.66  | 0.73 | -0.68 ns  |
| Mtmr2         | myotubularin related protein 2                                                             | 77116  | 1.19  | 0.92  | 0.48  | 2.48 | 0.90 *    |
| Senp2         | SUMO/sentrin specific peptidase 2                                                          | 75826  | 1.40  | 1.25  | 1.55  | 0.90 | -0.67 ns  |
| Col4a5        | procollagen, type IV, alpha 5                                                              | 12830  | 2.32  | 2.18  | 2.70  | 0.85 | -0.67 ns  |
| Cnot6l        | CCR4-NOT transcription complex, subunit 6-like                                             | 231464 | 2.49  | 2.55  | 2.86  | 0.87 | -0.46 ns  |
| Ankmy2        | ankyrin repeat and MYND domain containing 2                                                | 217473 | 1.31  | 1.23  | 1.03  | 1.27 | 0.25 ns   |
| Mtmr6         | myotubularin related protein 6                                                             | 219135 | 1.24  | 1.24  | 1.24  | 0.99 | -0.07 ns  |
| Bmpr1a        | bone morphogenetic protein receptor, type 1A                                               | 12166  | 2.22  | 2.00  | 1.79  | 1.24 | 0.75 ns   |
| Gcnt2         | glucosaminyl (N-acetyl) transferase 2, I-branching enzyme                                  | 14538  | 0.43  | 0.57  | 1.02  | 0.42 | -0.68 ns  |
| Mylk          | myosin, light polypeptide kinase                                                           | 107589 | 3.20  | 2.07  | 1.47  | 2.16 | 0.10 ns   |
| Arfrp1        | ADP-ribosylation factor related protein 1                                                  | 76688  | 0.62  | 0.58  | 0.72  | 0.86 | -0.41 ns  |
| P2rx4         | purinergic receptor P2X, ligand-gated ion channel 4                                        | 18438  | 0.40  | 0.43  | 0.49  | 0.80 | -0.98 *** |
| Bin1          | bridging integrator 1                                                                      | 30948  | 0.18  | 0.34  | 0.33  | 0.55 | -0.15 ns  |
| Stx3          | syntaxin 3                                                                                 | 20908  | 2.55  | 2.75  | 2.28  | 1.11 | 0.65 ns   |
| Ppp2r5c       | protein phosphatase 2, regulatory subunit B (B56), gamma isoform                           | 26931  | 2.03  | 2.16  | 3.57  | 0.57 | -0.69 ns  |
| H2-D1         | histocompatibility 2, D region locus 1                                                     | 14964  | 3.40  | 3.12  | 4.31  | 0.79 | 0.08 ns   |
| Hip1r         | huntingtin interacting protein 1 related                                                   | 29816  | 0.85  | 0.96  | 1.10  | 0.77 | -0.76 ns  |
| Cdc16         | CDC16 cell division cycle 16 homolog (S. cerevisiae)                                       | 69957  | 1.45  | 1.39  | 1.66  | 0.87 | 0.12 ns   |
| Klc3          | kinesin light chain 3                                                                      | 232943 | 0.90  | 0.91  | 1.03  | 0.88 | -0.50 ns  |
| S100a16       | S100 calcium binding protein A16                                                           | 67860  | 2.84  | 3.38  | 2.48  | 1.14 | 0.08 ns   |
| Trnt1         | tRNA nucleotidyl transferase, CCA-adding, 1                                                | 70047  | 0.87  | 0.98  | 1.27  | 0.68 | -0.75 ns  |
| Anxa5         | annexin A5                                                                                 | 11747  | 10.63 | 10.09 | 8.46  | 1.25 | 0.59 ns   |
| Tmem33        | transmembrane protein 33                                                                   | 67878  | 1.53  | 1.39  | 1.84  | 0.83 | -0.65 ns  |
| Pik3c3        | phosphoinositide-3-kinase, class 3                                                         | 225326 | 0.43  | 0.57  | 0.66  | 0.65 | -0.56 ns  |
| Med12         | mediator of RNA polymerase II transcription, subunit 12 homolog (yeast)                    | 59024  | 0.55  | 0.57  | 0.80  | 0.68 | -0.83 *   |
| Chmp2a        | chromatin modifying protein 2A                                                             | 68953  | 2.23  | 2.14  | 2.68  | 0.83 | -0.72 ns  |
| Rtkn          | rhotekin                                                                                   | 20166  | 0.58  | 0.59  | 0.93  | 0.62 | -0.59 ns  |
| Pck2          | phosphoenolpyruvate carboxykinase 2 (mitochondrial)                                        | 74551  | 1.28  | 1.43  | 1.40  | 0.91 | -0.75 ns  |
| Ccdc23        | coiled-coil domain containing 23                                                           | 69216  | 0.49  | 0.50  | 0.53  | 0.92 | -0.80 ns  |

|               |                                                                                         |        |       |       |      |       |          |
|---------------|-----------------------------------------------------------------------------------------|--------|-------|-------|------|-------|----------|
| Gtf2i         |                                                                                         | 14886  | 3.71  | 3.37  | 3.06 | 1.21  | 0.46 ns  |
| Nol6          | nucleolar protein family 6 (RNA-associated)                                             | 230082 | 0.40  | 0.28  | 0.36 | 1.09  | -0.22 ns |
| Cep290        | centrosomal protein 290                                                                 | 216274 | 0.49  | 0.63  | 0.47 | 1.05  | -0.33 ns |
| BC016495      | cDNA sequence BC016495                                                                  | 225994 | 0.49  | 0.63  | 0.76 | 0.64  | -0.80 ns |
| Baiap2        | brain-specific angiogenesis inhibitor 1-associated protein 2                            | 108100 | 0.54  | 0.52  | 0.50 | 1.07  | -0.09 ns |
| Ssu72         | Ssu72 RNA polymerase II CTD phosphatase homolog (yeast)                                 | 68991  | 1.60  | 1.48  | 1.86 | 0.86  | -0.41 ns |
| Mapk8ip1      | mitogen activated protein kinase 8 interacting protein 1                                | 19099  | 0.47  | 0.36  | 0.38 | 1.21  | -0.11 ns |
| Btrc          | beta-transducin repeat containing protein                                               | 12234  | 0.41  | 0.39  | 0.28 | 1.46  | 0.75 ns  |
| Tprkb         | Tp53rk binding protein                                                                  | 69786  | 0.47  | 0.63  | 0.60 | 0.79  | -0.50 ns |
| Enpp5         | ectonucleotide pyrophosphatase/phosphodiesterase 5                                      | 83965  | 1.28  | 1.28  | 0.89 | 1.43  | 0.52 ns  |
| Ddb2          | damage specific DNA binding protein 2                                                   | 107986 | 0.70  | 0.59  | 0.59 | 1.17  | 0.21 ns  |
| Ivns1abp      | influenza virus NS1A binding protein                                                    | 117198 | 4.80  | 5.13  | 4.80 | 0.99  | -0.55 ns |
| Nmi           | N-myc (and STAT) interactor                                                             | 64685  | 0.35  | 0.49  | 0.74 | 0.47  | -0.66 ns |
| Tacc2         | transforming, acidic coiled-coil containing protein 2                                   | 57752  | 1.87  | 1.53  | 1.35 | 1.37  | 0.50 ns  |
| Ung           | uracil DNA glycosylase                                                                  | 22256  | 1.05  | 1.08  | 1.24 | 0.84  | -0.78 ns |
| Six4          | sine oculis-related homeobox 4 homolog (Drosophila)                                     | 20474  | 0.70  | 0.63  | 0.67 | 1.03  | -0.47 ns |
| Tmem167       | transmembrane protein 167                                                               | 66074  | 0.96  | 1.25  | 2.05 | 0.47  | -0.64 ns |
| Map3k7        | mitogen activated protein kinase kinase kinase 7                                        | 26409  | 0.43  | 0.34  | 0.39 | 1.09  | 0.49 ns  |
| Csrp1         | cysteine and glycine-rich protein 1                                                     | 13007  | 3.09  | 3.44  | 3.34 | 0.92  | 0.24 ns  |
| Hmmr          | hyaluronan mediated motility receptor (RHAMM)                                           | 15366  | 1.52  | 1.52  | 2.01 | 0.75  | -0.32 ns |
| 2810452K22Rik |                                                                                         | 67236  | 0.89  | 1.23  | 1.60 | 0.55  | -0.68 ns |
| LOC640972     |                                                                                         | 640972 | 0.89  | 1.23  | 1.60 | 0.55  | -0.68 ns |
| Sema3f        | sema domain, immunoglobulin domain (Ig), short basic domain, secreted, (semaphorin) 3 F | 20350  | 0.73  | 0.53  | 0.63 | 1.16  | 0.50 ns  |
| Cklf          | chemokine-like factor                                                                   | 75458  | 0.60  | 0.78  | 0.86 | 0.70  | 0.00 ns  |
| Nfkb2         | nuclear factor of kappa light polypeptide gene enhancer in B-cells 2, p49/p100          | 18034  | 0.74  | 0.90  | 0.86 | 0.86  | 0.33 ns  |
| 1810055G02Rik | RIKEN cDNA 1810055G02 gene                                                              | 72056  | 0.67  | 0.71  | 0.52 | 1.29  | 0.77 ns  |
| Atf5          | activating transcription factor 5                                                       | 107503 | 0.36  | 0.63  | 0.39 | 0.91  | 0.06 ns  |
| Nt5c2         | 5'-nucleotidase, cytosolic II                                                           | 76952  | 1.61  | 1.57  | 1.45 | 1.10  | 0.73 ns  |
| B4gal4        | UDP-Gal:betaGlcNAc beta 1,4-galactosyltransferase, polypeptide 4                        | 56375  | 0.44  | 0.50  | 0.34 | 1.29  | 0.01 ns  |
| Hexim1        | hexamethylene bis-acetamide inducible 1                                                 | 192231 | 0.77  | 0.89  | 0.85 | 0.90  | 0.30 ns  |
| Cdadc1        | cytidine and dCMP deaminase domain containing 1                                         | 71891  | 0.54  | 0.45  | 0.36 | 1.51  | 0.39 ns  |
| Zfx           | zinc finger protein X-linked                                                            | 22764  | 0.63  | 0.70  | 0.88 | 0.72  | -0.69 ns |
| Mapk8ip3      | mitogen-activated protein kinase 8 interacting protein 3                                | 30957  | 0.38  | 0.29  | 0.20 | 1.88  | 0.93 **  |
| Fbf1          | Fas (TNFRSF6) binding factor 1                                                          | 217335 | 0.67  | 0.72  | 0.82 | 0.82  | -0.16 ns |
| LOC635075     |                                                                                         | 635075 | 0.48  | 0.54  | 0.48 | 0.99  | 0.14 ns  |
| Rbl2          |                                                                                         | 19651  | 0.48  | 0.54  | 0.48 | 0.99  | 0.14 ns  |
| Cdc7          | cell division cycle 7 (S. cerevisiae)                                                   | 12545  | 1.11  | 1.02  | 0.98 | 1.12  | 0.71 ns  |
| Ggnbp2        | gametogenetin binding protein 2                                                         | 217039 | 2.12  | 1.92  | 2.14 | 0.99  | -0.33 ns |
| 2610301G19Rik | RIKEN cDNA 2610301G19 gene                                                              | 219158 | 0.88  | 0.91  | 0.84 | 1.04  | 0.54 ns  |
| Asph          | aspartate-beta-hydroxylase                                                              | 65973  | 0.69  | 0.93  | 1.30 | 0.53  | -0.73 ns |
| 0610011L14Rik | RIKEN cDNA 0610011L14 gene                                                              | 68295  | 0.45  | 0.52  | 0.45 | 0.99  | 0.18 ns  |
| Vill          | villin-like                                                                             | 22351  | 0.54  | 0.66  | 0.67 | 0.80  | -0.39 ns |
| Dbn1          | drebrin 1                                                                               | 56320  | 0.32  | 0.65  | 0.75 | 0.43  | -0.79 ns |
| Apeh          | acylpeptide hydrolase                                                                   | 235606 | 0.87  | 0.88  | 1.14 | 0.76  | -0.18 ns |
| Rabggtg       | Rab geranylgeranyl transferase, a subunit                                               | 56187  | 0.56  | 0.46  | 0.66 | 0.84  | -0.56 ns |
| Hrc           |                                                                                         | 15464  | 1.91  | 1.73  | 2.01 | 0.95  | -0.43 ns |
| Cenpb         | centromere protein B                                                                    | 12616  | 0.87  | 1.06  | 1.34 | 0.65  | -0.55 ns |
| Mlh3          | mutL homolog 3 (E coli)                                                                 | 217716 | 0.50  | 0.50  | 0.48 | 1.02  | -0.12 ns |
| Trib3         | tribbles homolog 3 (Drosophila)                                                         | 228775 | 0.46  | 0.83  | 0.68 | 0.67  | -0.48 ns |
| Slc7a4        | solute carrier family 7 (cationic amino acid transporter, y+ system), member 4          | 224022 | 0.37  | 0.35  | 0.38 | 0.96  | -0.23 ns |
| Gpr108        | G protein-coupled receptor 108                                                          | 78308  | 0.61  | 0.56  | 0.55 | 1.11  | 0.72 ns  |
| Btg1          | B-cell translocation gene 1, anti-proliferative                                         | 12226  | 10.96 | 11.16 | 9.71 | 1.12  | -0.01 ns |
| Tor1aip1      | torsin A interacting protein 1                                                          | 208263 | 0.48  | 0.47  | 0.43 | 1.13  | 0.61 ns  |
| BC003331      | cDNA sequence BC003331                                                                  | 226499 | 0.80  | 0.77  | 0.59 | 1.35  | 0.64 ns  |
| Tnfrsf22      | tumor necrosis factor receptor superfamily, member 22                                   | 79202  | 0.09  | 0.07  | 0.38 | 0.24  | -0.61 ns |
| Irf3          | interferon regulatory factor 3                                                          | 54131  | 0.69  | 0.77  | 0.94 | 0.73  | -0.73 ns |
| Tomm40        | translocase of outer mitochondrial membrane 40 homolog (yeast)                          | 53333  | 0.91  | 1.00  | 1.15 | 0.78  | -0.69 ns |
| Clk1          | CDC-like kinase 1                                                                       | 12747  | 1.62  | 1.51  | 1.15 | 1.40  | 0.47 ns  |
| Mitd1         | MIT, microtubule interacting and transport, domain containing 1                         | 69028  | 0.25  | 0.26  | 0.44 | 0.55  | -0.68 ns |
| Ube2j2        | ubiquitin-conjugating enzyme E2, J2 homolog (yeast)                                     | 140499 | 1.24  | 1.22  | 1.29 | 0.96  | 0.32 ns  |
| Stk16         | serine/threonine kinase 16                                                              | 20872  | 0.51  | 0.47  | 0.29 | 1.74  | 0.61 ns  |
| Casp3         | caspase 3                                                                               | 12367  | 0.23  | 0.20  | 0.21 | 1.10  | 0.17 ns  |
| Cst3          | cystatin C                                                                              | 13010  | 3.55  | 4.07  | 5.38 | 0.66  | -0.49 ns |
| Ppp1cb        | protein phosphatase 1, catalytic subunit, beta isoform                                  | 19046  | 6.79  | 5.93  | 9.12 | 0.74  | -0.84 *  |
| Ikkb          | inhibitor of kappaB kinase beta                                                         | 16150  | 1.49  | 1.70  | 1.91 | 0.78  | -0.20 ns |
| Plagl1        | pleiomorphic adenoma gene-like 1                                                        | 22634  | 9.22  | 5.76  | 0.72 | 12.70 | 0.15 ns  |
| Strn4         | striatin, calmodulin binding protein 4                                                  | 97387  | 1.68  | 1.32  | 1.79 | 0.94  | 0.14 ns  |
| Tmem161a      | transmembrane protein 161A                                                              | 234371 | 0.77  | 0.66  | 0.81 | 0.95  | -0.09 ns |
| Imp4          | IMP4, U3 small nucleolar ribonucleoprotein, homolog (yeast)                             | 27993  | 0.83  | 0.82  | 0.58 | 1.41  | 0.40 ns  |
| 4930471M23Rik | RIKEN cDNA 4930471M23 gene                                                              | 74919  | 0.23  | 0.32  | 0.49 | 0.46  | -0.81 ns |
| BC024479      | cDNA sequence BC024479                                                                  | 235184 | 0.41  | 0.37  | 0.31 | 1.30  | 0.81 ns  |
| BC002199      | cDNA sequence BC002199                                                                  | 211556 | 3.15  | 3.14  | 2.21 | 1.42  | 0.40 ns  |
| Sp2           | Sp2 transcription factor                                                                | 78912  | 0.33  | 0.23  | 0.38 | 0.85  | -0.45 ns |
| Bmp1          | bone morphogenetic protein 1                                                            | 12153  | 0.39  | 0.37  | 0.34 | 1.14  | 0.42 ns  |
| Arrb2         | arrestin, beta 2                                                                        | 216869 | 0.63  | 0.64  | 0.72 | 0.88  | 0.23 ns  |
| Scmh1         | sex comb on midleg homolog 1                                                            | 29871  | 0.53  | 0.47  | 0.44 | 1.19  | -0.03 ns |
| Polr2a        | polymerase (RNA) II (DNA directed) polypeptide A                                        | 20020  | 1.69  | 1.67  | 1.24 | 1.36  | 0.38 ns  |
| Cth           | cystathionase (cystathionine gamma-lyase)                                               | 107869 | 0.24  | 0.52  | 0.23 | 1.04  | -0.15 ns |
| Stk24         | serine/threonine kinase 24 (STE20 homolog, yeast)                                       | 223255 | 2.43  | 2.00  | 2.64 | 0.92  | -0.17 ns |
| Tm2d1         | TM2 domain containing 1                                                                 | 94043  | 0.57  | 0.53  | 0.70 | 0.81  | -0.58 ns |
| Timm17a       | translocase of inner mitochondrial membrane 17a                                         | 21854  | 2.93  | 2.79  | 2.25 | 1.30  | 0.78 ns  |
| Sars          | seryl-aminoacyl-tRNA synthetase                                                         | 20226  | 4.36  | 5.33  | 3.86 | 1.12  | 0.26 ns  |
| Sorl1         | sortilin-related receptor, LDLR class A repeats-containing                              | 20660  | 3.53  | 2.84  | 2.10 | 1.68  | 0.07 ns  |
| Pank3         | pantothenate kinase 3                                                                   | 211347 | 0.33  | 0.34  | 0.42 | 0.79  | -0.18 ns |

|               |                                                                                                            |        |       |       |       |      |          |
|---------------|------------------------------------------------------------------------------------------------------------|--------|-------|-------|-------|------|----------|
| Cadm4         | cell adhesion molecule 4                                                                                   | 260299 | 0.49  | 0.71  | 0.82  | 0.59 | -0.39 ns |
| Dlat          | dihydropolipoamide S-acetyltransferase (E2 component of pyruvate dehydrogenase complex)                    | 235339 | 1.20  | 0.99  | 0.98  | 1.22 | 0.86 *   |
| Zbtb80s       | zinc finger and BTB domain containing 8 opposite strand                                                    | 67106  | 0.47  | 0.57  | 0.55  | 0.85 | -0.42 ns |
| C130090K23Rik | RIKEN cDNA C130090K23 gene                                                                                 | 231293 | 0.11  | 0.23  | 1.00  | 0.11 | -0.53 ns |
| Smc5          | structural maintenance of chromosomes 5                                                                    | 226026 | 1.20  | 1.40  | 1.49  | 0.80 | -0.94 ** |
| Lmbr1         | limb region 1                                                                                              | 56873  | 0.62  | 0.62  | 0.48  | 1.27 | 0.31 ns  |
| Ifih1         | interferon induced with helicase C domain 1                                                                | 71586  | 0.24  | 0.42  | 1.10  | 0.21 | -0.85 *  |
| 5830415L20Rik | RIKEN cDNA 5830415L20 gene                                                                                 | 68152  | 0.71  | 0.68  | 0.86  | 0.82 | -0.65 ns |
| Krt20         | keratin 20                                                                                                 | 66809  | 0.99  | 1.77  | 2.42  | 0.41 | -0.89 *  |
| Noc3l         | nucleolar complex associated 3 homolog (S. cerevisiae)                                                     | 57753  | 0.37  | 0.46  | 0.27  | 1.34 | 0.15 ns  |
| Qrich1        | glutamine-rich 1                                                                                           | 69232  | 1.24  | 1.11  | 1.15  | 1.07 | 0.61 ns  |
| Dimt1         | DIM1 dimethyladenosine transferase 1-like (S. cerevisiae)                                                  | 66254  | 0.20  | 0.40  | 0.45  | 0.45 | -0.93 ** |
| Tcfe2a        | transcription factor E2a                                                                                   | 21423  | 1.31  | 1.28  | 0.97  | 1.35 | 0.42 ns  |
| Upk1a         | uropod 1A                                                                                                  | 109637 | 0.87  | 0.38  | 0.16  | 5.45 | 0.49 ns  |
| Cyb5r4        | cytochrome b5 reductase 4                                                                                  | 266690 | 1.48  | 1.31  | 1.21  | 1.22 | 0.80 ns  |
| Zdhhc5        | zinc finger, DHHC domain containing 5                                                                      | 228136 | 0.64  | 0.43  | 0.59  | 1.08 | 0.02 ns  |
| Bre           | brain and reproductive organ-expressed protein                                                             | 107976 | 0.84  | 1.11  | 1.27  | 0.66 | -0.95 ** |
| Cntf          |                                                                                                            | 12803  | 0.51  | 0.61  | 0.42  | 1.22 | 0.30 ns  |
| Stt3b         | STT3, subunit of the oligosaccharyltransferase complex, homolog B (S. cerevisiae)                          | 68292  | 7.79  | 7.71  | 4.93  | 1.57 | 0.85 *   |
| Prepl         | prolyl endopeptidase-like                                                                                  | 213760 | 0.71  | 0.53  | 0.36  | 1.99 | 0.77 ns  |
| 2010321M09Rik | RIKEN cDNA 2010321M09 gene                                                                                 | 69882  | 0.79  | 0.69  | 0.72  | 1.10 | 0.64 ns  |
| Hspd1         | heat shock protein 1 (chaperonin)                                                                          | 15510  | 6.58  | 6.26  | 4.85  | 1.35 | 0.51 ns  |
| Stat6         | signal transducer and activator of transcription 6                                                         | 20852  | 1.13  | 1.09  | 1.17  | 0.96 | -0.59 ns |
| 6330578E17Rik | RIKEN cDNA 6330578E17 gene                                                                                 | 76178  | 1.96  | 2.26  | 2.00  | 0.98 | -0.48 ns |
| Taok1         | TAO kinase 1                                                                                               | 216965 | 2.40  | 2.24  | 1.67  | 1.43 | 0.71 ns  |
| Tmem144       | transmembrane protein 144                                                                                  | 70652  | 0.33  | 0.50  | 0.34  | 0.95 | 0.15 ns  |
| Mrrf          | mitochondrial ribosome recycling factor                                                                    | 67871  | 0.73  | 0.75  | 0.52  | 1.40 | 0.68 ns  |
| 2810403A07Rik | RIKEN cDNA 2810403A07 gene                                                                                 | 74200  | 1.22  | 1.09  | 1.11  | 1.10 | -0.29 ns |
| Eif2c2        | eukaryotic translation initiation factor 2C, 2                                                             | 239528 | 0.45  | 0.47  | 0.56  | 0.81 | -0.18 ns |
| Cab39l        | calcium binding protein 39-like                                                                            | 69008  | 0.84  | 0.77  | 0.63  | 1.33 | -0.02 ns |
| Rin2          | Ras and Rab interactor 2                                                                                   | 74030  | 0.11  | 0.21  | 0.54  | 0.21 | -0.86 *  |
| Ski           | Sloan-Kettering viral oncogene homolog                                                                     | 20481  | 0.77  | 0.74  | 0.59  | 1.30 | 0.73 ns  |
| 2410166I05Rik | RIKEN cDNA 2410166I05 gene                                                                                 | 76824  | 0.86  | 0.77  | 1.00  | 0.86 | -0.65 ns |
| Eif4b         | eukaryotic translation initiation factor 4B                                                                | 75705  | 6.74  | 6.41  | 5.62  | 1.19 | 0.87 *   |
| Pprc1         | peroxisome proliferative activated receptor, gamma, coactivator-related 1                                  | 226169 | 0.95  | 1.27  | 1.07  | 0.88 | -0.23 ns |
| Cry2          | cryptochrome 2 (photolyase-like)                                                                           | 12953  | 0.36  | 0.25  | 0.27  | 1.32 | -0.01 ns |
| Pisd          |                                                                                                            | 320951 | 2.64  | 3.06  | 3.32  | 0.79 | -0.30 ns |
| Arf1          | ADP-ribosylation factor 1                                                                                  | 11840  | 12.69 | 13.23 | 13.46 | 0.94 | -0.40 ns |
| Sdf4          | stromal cell derived factor 4                                                                              | 20318  | 1.72  | 1.82  | 1.93  | 0.89 | -0.38 ns |
| Tgfb2         | transforming growth factor, beta receptor II                                                               | 21813  | 4.41  | 4.01  | 2.61  | 1.68 | 0.88 *   |
| Ube2w         | ubiquitin-conjugating enzyme E2W (putative)                                                                | 66799  | 0.60  | 0.68  | 0.55  | 1.09 | -0.16 ns |
| Capns1        | calpain, small subunit 1                                                                                   | 12336  | 3.20  | 3.62  | 3.81  | 0.84 | -0.63 ns |
| Ppp3ca        | protein phosphatase 3, catalytic subunit, alpha isoform                                                    | 19055  | 1.58  | 1.46  | 1.15  | 1.37 | 0.11 ns  |
| Syncrip       | synaptotagmin binding, cytoplasmic RNA interacting protein                                                 | 56403  | 1.58  | 1.74  | 1.85  | 0.85 | -0.10 ns |
| Actr1b        | ARP1 actin-related protein 1 homolog B (yeast)                                                             | 226977 | 0.52  | 0.57  | 0.55  | 0.94 | -0.04 ns |
| Setd8         | SET domain containing (lysine methyltransferase) 8                                                         | 67956  | 1.58  | 1.61  | 1.68  | 0.94 | -0.49 ns |
| Cugbp1        | CUG triplet repeat, RNA binding protein 1                                                                  | 13046  | 6.42  | 5.85  | 5.45  | 1.17 | 0.28 ns  |
| Lzts2         | leucine zipper, putative tumor suppressor 2                                                                | 226154 | 1.10  | 1.03  | 0.78  | 1.40 | 0.75 ns  |
| Pdk3          | pyruvate dehydrogenase kinase, isoenzyme 3                                                                 | 236900 | 0.72  | 0.71  | 1.03  | 0.69 | -0.19 ns |
| Yipf4         | Yip1 domain family, member 4                                                                               | 67864  | 2.44  | 2.04  | 1.74  | 1.40 | 0.94 **  |
| Rbm26         | RNA binding motif protein 26                                                                               | 74213  | 0.98  | 1.12  | 1.40  | 0.69 | -0.91 *  |
| Cc2d1a        | coiled-coil and C2 domain containing 1A                                                                    | 212139 | 0.72  | 0.75  | 1.03  | 0.69 | -0.40 ns |
| Sugt1         | SGT1, suppressor of G2 allele of SKP1 (S. cerevisiae)                                                      | 67955  | 2.17  | 2.18  | 2.65  | 0.81 | -0.59 ns |
| Jag2          | jagged 2                                                                                                   | 16450  | 0.09  | 0.24  | 0.38  | 0.23 | -0.71 ns |
| Tmem43        | transmembrane protein 43                                                                                   | 74122  | 0.79  | 0.84  | 1.73  | 0.45 | -0.73 ns |
| Tmem135       | transmembrane protein 135                                                                                  | 72759  | 0.61  | 0.50  | 0.55  | 1.09 | -0.03 ns |
| Hdac3         | histone deacetylase 3                                                                                      | 15183  | 1.09  | 1.33  | 1.30  | 0.83 | 0.11 ns  |
| Dhrs7         | dehydrogenase/reductase (SDR family) member 7                                                              | 66375  | 0.35  | 0.47  | 0.70  | 0.50 | -0.16 ns |
| Nup35         | nucleoporin 35                                                                                             | 69482  | 0.61  | 0.58  | 0.45  | 1.34 | 0.88 *   |
| 6030465E24Rik | RIKEN cDNA 6030465E24 gene                                                                                 | 214585 | 0.65  | 0.56  | 0.52  | 1.23 | 0.47 ns  |
| Pitrm1        | pitrilysin metallopeptidase 1                                                                              | 69617  | 1.43  | 1.36  | 1.31  | 1.08 | 0.66 ns  |
| Arhgdib       | Rho, GDP dissociation inhibitor (GDI) beta                                                                 | 11857  | 1.69  | 1.63  | 0.37  | 4.55 | -0.05 ns |
| Sdccag10      | serologically defined colon cancer antigen 10                                                              | 67285  | 0.30  | 0.35  | 0.39  | 0.78 | -0.46 ns |
| SImap         | sarcolemma associated protein                                                                              | 83997  | 3.11  | 2.70  | 2.95  | 1.05 | -0.19 ns |
| AW549877      | expressed sequence AW549877                                                                                | 106064 | 2.27  | 1.67  | 1.82  | 1.24 | 0.50 ns  |
| Gphn          | gephyrin                                                                                                   | 268566 | 0.92  | 0.88  | 1.01  | 0.90 | 0.02 ns  |
| Dlgap4        | discs, large homolog-associated protein 4 (Drosophila)                                                     | 228836 | 0.67  | 0.68  | 0.93  | 0.72 | -0.73 ns |
| 0610037L13Rik | RIKEN cDNA 0610037L13 gene                                                                                 | 74098  | 0.38  | 0.27  | 0.32  | 1.19 | 0.29 ns  |
| Tbp           | TATA box binding protein                                                                                   | 21374  | 0.83  | 0.64  | 0.55  | 1.51 | 0.73 ns  |
| Zfp52         | zinc finger protein 52                                                                                     | 22710  | 0.90  | 1.12  | 0.79  | 1.13 | 0.31 ns  |
| Dnajc9        | DnaJ (Hsp40) homolog, subfamily C, member 9                                                                | 108671 | 3.26  | 3.16  | 3.38  | 0.96 | 0.17 ns  |
| Atpaf2        | ATP synthase mitochondrial F1 complex assembly factor 2                                                    | 246782 | 0.50  | 0.43  | 0.67  | 0.74 | -0.52 ns |
| Hmbs          | hydroxymethylbilane synthase                                                                               | 15288  | 1.29  | 1.16  | 1.28  | 1.00 | 0.52 ns  |
| Rasa1         | RAS p21 protein activator 1                                                                                | 218397 | 1.42  | 1.76  | 2.15  | 0.66 | -0.74 ns |
| Sbds          | Shwachman-Bodian-Diamond syndrome homolog (human)                                                          | 66711  | 1.07  | 0.92  | 1.25  | 0.86 | -0.53 ns |
| Klhl22        | kelch-like 22 (Drosophila)                                                                                 | 224023 | 2.35  | 2.45  | 3.21  | 0.73 | -0.66 ns |
| Prkrir        | protein-kinase, interferon-inducible double stranded RNA dependent inhibitor, repressor of (P58 repressor) | 72981  | 0.83  | 0.84  | 0.79  | 1.05 | 0.40 ns  |
| Rbbp6         | retinoblastoma binding protein 6                                                                           | 19647  | 0.73  | 0.86  | 1.01  | 0.72 | -0.69 ns |
| Bfar          | bifunctional apoptosis regulator                                                                           | 67118  | 0.81  | 0.81  | 0.71  | 1.13 | 0.50 ns  |
| Herc2         | hect (homologous to the E6-AP (UBE3A) carboxyl terminus) domain and RCC1 (CHC1)-like domain (RLD) 2        | 15204  | 0.48  | 0.46  | 0.58  | 0.83 | -0.61 ns |
| Tdp1          | tyrosyl-DNA phosphodiesterase 1                                                                            | 104884 | 0.44  | 0.36  | 0.49  | 0.89 | 0.12 ns  |
| Rg9mtd3       | RNA (guanine-9-) methyltransferase domain containing 3                                                     | 69934  | 0.31  | 0.41  | 0.34  | 0.90 | 0.17 ns  |
| Wdr55         | WD repeat domain 55                                                                                        | 67936  | 0.47  | 0.48  | 0.65  | 0.73 | -0.26 ns |

|               |                                                                                  |        |       |       |       |      |           |
|---------------|----------------------------------------------------------------------------------|--------|-------|-------|-------|------|-----------|
| Sh3glb2       | SH3-domain GRB2-like endophilin B2                                               | 227700 | 0.67  | 0.74  | 0.56  | 1.20 | 0.44 ns   |
| Icmt          | isoprenylcysteine carboxyl methyltransferase                                     | 57295  | 0.60  | 0.52  | 0.64  | 0.93 | -0.43 ns  |
| Rnf121        | ring finger protein 121                                                          | 75212  | 0.42  | 0.57  | 0.78  | 0.54 | -0.98 *** |
| Sccp5         | saccharopine dehydrogenase (putative)                                            | 109232 | 0.36  | 0.37  | 0.31  | 1.15 | 0.24 ns   |
| Tor1a         | torsin family 1, member A (torsin A)                                             | 30931  | 0.50  | 0.57  | 0.48  | 1.04 | -0.02 ns  |
| Lpin1         | lipin 1                                                                          | 14245  | 0.65  | 0.64  | 1.00  | 0.65 | -0.53 ns  |
| Tubgcp5       | tubulin, gamma complex associated protein 5                                      | 233276 | 0.43  | 0.40  | 0.46  | 0.94 | -0.35 ns  |
| LOC623031     |                                                                                  | 623031 | 1.61  | 1.46  | 1.55  | 1.03 | -0.35 ns  |
| Arid2         | AT rich interactive domain 2 (Arid-rfx like)                                     | 77044  | 3.62  | 3.13  | 3.10  | 1.16 | 0.88 *    |
| Toe1          | target of EGR1, member 1 (nuclear)                                               | 68276  | 0.37  | 0.35  | 0.44  | 0.84 | -0.81 *   |
| Tagln2        | transgelin 2                                                                     | 21346  | 2.05  | 2.00  | 2.19  | 0.93 | -0.08 ns  |
| Klhl5         | kelch-like 5 (Drosophila)                                                        | 71778  | 0.39  | 0.38  | 0.87  | 0.45 | -0.75 ns  |
| Arfgap3       | ADP-ribosylation factor GTPase activating protein 3                              | 66251  | 0.40  | 0.49  | 0.58  | 0.69 | -0.77 ns  |
| Narg2         | NMDA receptor-regulated gene 2                                                   | 93697  | 0.62  | 0.55  | 0.47  | 1.31 | 0.60 ns   |
| Endod1        | endonuclease domain containing 1                                                 | 71946  | 0.49  | 0.60  | 0.21  | 2.35 | 0.59 ns   |
| Atpbd4        | ATP binding domain 4                                                             | 66632  | 0.89  | 0.75  | 0.71  | 1.25 | 0.60 ns   |
| Pgam1         |                                                                                  | 18648  | 9.55  | 9.48  | 10.41 | 0.91 | -0.10 ns  |
| Suhw4         | suppressor of hairy wing homolog 4 (Drosophila)                                  | 235469 | 1.14  | 0.76  | 0.64  | 1.77 | 0.92 **   |
| LOC628147     |                                                                                  | 628147 | 1.10  | 1.16  | 1.12  | 0.98 | -0.35 ns  |
| Sbno1         | sno, strawberry notch homolog 1 (Drosophila)                                     | 243272 | 1.57  | 1.49  | 1.37  | 1.14 | 0.09 ns   |
| Il17re        | interleukin 17 receptor E                                                        | 57890  | 1.84  | 1.76  | 1.55  | 1.18 | -0.15 ns  |
| Frk           | fyn-related kinase                                                               | 14302  | 1.40  | 1.27  | 0.97  | 1.43 | -0.05 ns  |
| Me2           | malic enzyme 2, NAD(+)-dependent, mitochondrial                                  | 107029 | 0.45  | 0.48  | 0.48  | 0.93 | 0.29 ns   |
| Gnl2          | guanine nucleotide binding protein-like 2 (nucleolar)                            | 230737 | 0.49  | 0.58  | 0.67  | 0.73 | -0.35 ns  |
| Ptpmt1        | protein tyrosine phosphatase, mitochondrial 1                                    | 66461  | 1.16  | 0.89  | 1.05  | 1.10 | -0.20 ns  |
| Atf2          | activating transcription factor 2                                                | 11909  | 2.44  | 2.01  | 1.48  | 1.64 | 0.75 ns   |
| Mapk1         | mitogen activated protein kinase 1                                               | 26413  | 4.23  | 3.91  | 4.32  | 0.98 | -0.37 ns  |
| Slc25a11      | solute carrier family 25 (mitochondrial carrier oxoglutarate carrier), member 11 | 67863  | 1.47  | 1.48  | 2.11  | 0.69 | -0.81 *   |
| Stat3         | signal transducer and activator of transcription 3                               | 20848  | 1.07  | 1.08  | 1.13  | 0.94 | -0.17 ns  |
| Fbxo22        | F-box protein 22                                                                 | 71999  | 1.67  | 1.54  | 1.44  | 1.15 | 0.83 *    |
| Smn1          | survival motor neuron 1                                                          | 20595  | 0.39  | 0.59  | 0.69  | 0.56 | -0.80 ns  |
| Araf          | v-raf murine sarcoma 3611 viral oncogene homolog                                 | 11836  | 0.64  | 0.57  | 0.87  | 0.72 | -0.70 ns  |
| EG633640      | predicted gene, EG633640                                                         | 633640 | 0.26  | 0.22  | 0.45  | 0.58 | -0.80 ns  |
| Dis3          | DIS3 mitotic control homolog (S. cerevisiae)                                     | 72662  | 1.24  | 1.38  | 1.45  | 0.85 | -0.32 ns  |
| Tipin         | timeless interacting protein                                                     | 66131  | 4.87  | 3.97  | 3.37  | 1.44 | 0.93 **   |
| Snrpb2        | U2 small nuclear ribonucleoprotein B                                             | 20639  | 2.72  | 2.23  | 2.50  | 1.08 | -0.32 ns  |
| Prkcbp1       | protein kinase C binding protein 1                                               | 228880 | 0.94  | 1.17  | 1.21  | 0.78 | -0.10 ns  |
| Pomgnt1       | protein O-linked mannose beta1,2-N-acetylglucosaminyltransferase                 | 68273  | 0.69  | 0.74  | 0.83  | 0.83 | -0.72 ns  |
| Arhgap17      | Rho GTPase activating protein 17                                                 | 70497  | 0.33  | 0.40  | 0.43  | 0.77 | -0.84 *   |
| Ypel3         | yippepe-like 3 (Drosophila)                                                      | 66090  | 1.58  | 1.21  | 1.32  | 1.19 | 0.12 ns   |
| Zfp623        | zinc finger protein 623                                                          | 78834  | 0.77  | 0.75  | 0.92  | 0.83 | -0.27 ns  |
| Gtf2f2        | general transcription factor IIF, polypeptide 2                                  | 68705  | 0.98  | 0.66  | 0.98  | 1.00 | -0.16 ns  |
| Dhx8          | DEAH (Asp-Glu-Ala-His) box polypeptide 8                                         | 217207 | 0.60  | 0.62  | 0.62  | 0.96 | 0.44 ns   |
| Exosc2        | exosome component 2                                                              | 227715 | 0.72  | 0.81  | 0.56  | 1.28 | 0.55 ns   |
| Pus7          | pseudouridylyl synthase 7 homolog (S. cerevisiae)                                | 78697  | 0.50  | 0.53  | 0.48  | 1.05 | 0.35 ns   |
| Fn1           | fibronectin 1                                                                    | 14268  | 7.23  | 5.15  | 2.39  | 3.01 | 0.77 ns   |
| Elp3          | elongation protein 3 homolog (S. cerevisiae)                                     | 74195  | 0.85  | 0.74  | 0.71  | 1.18 | 0.54 ns   |
| Tbc1d20       | TBC1 domain family, member 20                                                    | 67231  | 1.08  | 1.02  | 1.33  | 0.81 | -0.47 ns  |
| 9130011J15Rik | RIKEN cDNA 9130011J15 gene                                                       | 66818  | 1.08  | 1.03  | 1.28  | 0.83 | -0.17 ns  |
| Mapkapk2      | MAP kinase-activated protein kinase 2                                            | 17164  | 0.92  | 1.03  | 0.93  | 0.99 | -0.33 ns  |
| Zc3hc1        | zinc finger, C3HC type 1                                                         | 232679 | 0.34  | 0.37  | 0.56  | 0.60 | -0.51 ns  |
| EG665189      |                                                                                  | 665189 | 19.66 | 18.72 | 16.64 | 1.18 | 0.84 *    |
| Rpl27a        |                                                                                  | 26451  | 19.66 | 18.72 | 16.64 | 1.18 | 0.84 *    |
| Cmas          | cytidine monophospho-N-acetylneuraminic acid synthetase                          | 12764  | 1.04  | 1.34  | 1.71  | 0.60 | -0.71 ns  |
| Slc45a3       | solute carrier family 45, member 3                                               | 212980 | 0.53  | 0.51  | 0.35  | 1.52 | 0.32 ns   |
| Katnb1        | katanin p80 (WD40-containing) subunit B 1                                        | 74187  | 0.58  | 0.59  | 0.53  | 1.09 | 0.75 ns   |
| Unc84a        | unc-84 homolog A (C. elegans)                                                    | 77053  | 1.71  | 1.47  | 1.58  | 1.08 | 0.45 ns   |
| Slc30a9       | solute carrier family 30 (zinc transporter), member 9                            | 109108 | 1.42  | 1.50  | 1.74  | 0.81 | -0.54 ns  |
| C530044N13Rik | RIKEN cDNA C530044N13 gene                                                       | 223978 | 0.21  | 0.22  | 0.38  | 0.55 | -0.91 *   |
| Agri          | agrifin                                                                          | 11603  | 4.07  | 3.72  | 3.36  | 1.21 | 0.47 ns   |
| Rbm39         | RNA binding motif protein 39                                                     | 170791 | 4.89  | 4.81  | 4.70  | 1.03 | -0.30 ns  |
| Cdh3          | cadherin 3                                                                       | 12560  | 1.70  | 1.49  | 0.62  | 2.73 | 0.68 ns   |
| Tom70a        | translocase of outer mitochondrial membrane 70 homolog A (yeast)                 | 28185  | 2.76  | 2.42  | 2.52  | 1.09 | -0.26 ns  |
| Flna          | filamin, alpha                                                                   | 192176 | 2.32  | 3.04  | 3.79  | 0.61 | -0.87 *   |
| Sepn1         | selenoprotein N, 1                                                               | 74777  | 0.43  | 0.46  | 0.50  | 0.85 | -0.74 ns  |
| Unk           | unkempt homolog (Drosophila)                                                     | 217331 | 0.59  | 0.60  | 0.52  | 1.12 | 0.80 ns   |
| Cnot6         | CCR4-NOT transcription complex, subunit 6                                        | 104625 | 4.74  | 4.54  | 5.21  | 0.91 | -0.20 ns  |
| Sdha          | succinate dehydrogenase complex, subunit A, flavoprotein (Fp)                    | 66945  | 3.05  | 3.66  | 4.22  | 0.72 | -0.86 *   |
| Srebf1        | sterol regulatory element binding factor 1                                       | 20787  | 2.02  | 1.97  | 2.47  | 0.81 | -0.80 ns  |
| Tjap1         | tight junction associated protein 1                                              | 74094  | 1.17  | 1.03  | 0.71  | 1.63 | 0.88 *    |
| 9030624J02Rik | RIKEN cDNA 9030624J02 gene                                                       | 71517  | 0.54  | 0.54  | 0.59  | 0.91 | -0.56 ns  |
| Usp52         | ubiquitin specific peptidase 52                                                  | 103135 | 0.63  | 0.68  | 0.60  | 1.03 | 0.24 ns   |
| Gak           | cyclin G associated kinase                                                       | 231580 | 1.07  | 1.19  | 1.25  | 0.85 | -0.75 ns  |
| Iars          | isoleucine-tRNA synthetase                                                       | 105148 | 2.34  | 2.50  | 2.57  | 0.91 | -0.26 ns  |
| Tubgcp3       | tubulin, gamma complex associated protein 3                                      | 259279 | 0.72  | 0.80  | 0.89  | 0.80 | -0.22 ns  |
| Antxr2        | anthrax toxin receptor 2                                                         | 71914  | 0.81  | 0.56  | 0.57  | 1.43 | 0.66 ns   |
| Usp33         | ubiquitin specific peptidase 33                                                  | 170822 | 0.87  | 1.06  | 1.19  | 0.72 | -0.88 *   |
| Calm3         | calmodulin 3                                                                     | 12315  | 2.43  | 2.45  | 2.76  | 0.88 | -0.16 ns  |
| Tdrd7         | tudor domain containing 7                                                        | 100121 | 0.29  | 0.35  | 0.62  | 0.46 | -0.58 ns  |
| Skiv2l2       | superkiller viralicidic activity 2-like 2 (S. cerevisiae)                        | 72198  | 1.20  | 1.44  | 1.67  | 0.72 | -0.52 ns  |
| Apbb2         | amyloid beta (A4) precursor protein-binding, family B, member 2                  | 11787  | 0.85  | 0.93  | 0.64  | 1.31 | 0.39 ns   |
| Tiparp        | TCDD-inducible poly(ADP-ribose) polymerase                                       | 99929  | 2.20  | 2.23  | 2.08  | 1.05 | 0.44 ns   |
| Slc38a2       | solute carrier family 38, member 2                                               | 67760  | 8.07  | 8.81  | 8.56  | 0.94 | -0.71 ns  |
| Ppp1r10       | protein phosphatase 1, regulatory subunit 10                                     | 52040  | 0.63  | 0.74  | 0.63  | 0.99 | 0.16 ns   |
| Itpk1         | inositol 1,3,4-triphosphate 5/6 kinase                                           | 217837 | 0.62  | 0.71  | 0.76  | 0.80 | -0.55 ns  |
| Iars2         | isoleucine-tRNA synthetase 2, mitochondrial                                      | 381314 | 0.54  | 0.52  | 0.49  | 1.08 | -0.25 ns  |

|               |                                                                                                   |        |      |       |      |      |          |
|---------------|---------------------------------------------------------------------------------------------------|--------|------|-------|------|------|----------|
| Donson        | downstream neighbor of SON                                                                        | 60364  | 0.65 | 0.66  | 0.92 | 0.71 | -0.38 ns |
| Fastkd2       | FAST kinase domains 2                                                                             | 75619  | 0.86 | 0.86  | 0.65 | 1.33 | 0.33 ns  |
| Appl2         | adaptor protein, phosphotyrosine interaction, PH domain and leucine zipper containing 2           | 216190 | 0.98 | 0.87  | 0.70 | 1.39 | 0.34 ns  |
| 1810026J23Rik | RIKEN cDNA 1810026J23 gene                                                                        | 69773  | 1.09 | 0.78  | 0.74 | 1.47 | 0.74 ns  |
| Abcf3         | ATP-binding cassette, sub-family F (GCN20), member 3                                              | 27406  | 0.71 | 0.77  | 0.76 | 0.93 | -0.20 ns |
| Prmt3         | protein arginine N-methyltransferase 3                                                            | 71974  | 0.76 | 0.85  | 0.78 | 0.97 | -0.32 ns |
| Flnb          | filamin, beta                                                                                     | 286940 | 1.87 | 1.86  | 2.64 | 0.70 | -0.72 ns |
| Nup107        | nucleoporin 107                                                                                   | 103468 | 1.06 | 0.94  | 1.00 | 1.06 | 0.56 ns  |
| Phf17         | PHD finger protein 17                                                                             | 269424 | 2.14 | 2.08  | 1.83 | 1.16 | -0.31 ns |
| LOC675560     |                                                                                                   | 675560 | 4.06 | 3.45  | 2.44 | 1.65 | 0.79 ns  |
| Map4k3        |                                                                                                   | 225028 | 4.06 | 3.45  | 2.44 | 1.65 | 0.79 ns  |
| Ipo8          | importin 8                                                                                        | 320727 | 1.29 | 1.35  | 1.48 | 0.87 | -0.26 ns |
| Aof2          | amine oxidase (flavin containing) domain 2                                                        | 99982  | 2.10 | 2.31  | 2.57 | 0.81 | -0.58 ns |
| Oaz2          | ornithine decarboxylase antizyme 2                                                                | 18247  | 1.12 | 0.96  | 1.00 | 1.11 | 0.64 ns  |
| Commd7        |                                                                                                   | 99311  | 0.78 | 0.77  | 1.01 | 0.77 | -0.09 ns |
| LOC631742     |                                                                                                   | 631742 | 0.78 | 0.77  | 1.01 | 0.77 | -0.09 ns |
| LOC674161     |                                                                                                   | 674161 | 0.78 | 0.77  | 1.01 | 0.77 | -0.09 ns |
| Wdr90         | WD repeat domain 90                                                                               | 106618 | 0.86 | 0.73  | 0.62 | 1.38 | 0.94 **  |
| Maml1         | mastermind like 1 (Drosophila)                                                                    | 103806 | 0.79 | 0.84  | 0.89 | 0.88 | -0.86 *  |
| Pex5          | peroxisome biogenesis factor 5                                                                    | 19305  | 0.40 | 0.30  | 0.40 | 0.99 | 0.02 ns  |
| Parp12        | poly (ADP-ribose) polymerase family, member 12                                                    | 243771 | 0.22 | 0.37  | 1.07 | 0.20 | -0.75 ns |
| Scamp1        | secretory carrier membrane protein 1                                                              | 107767 | 0.96 | 1.41  | 2.04 | 0.47 | -0.89 *  |
| Dag1          | dystroglycan 1                                                                                    | 13138  | 4.15 | 3.59  | 3.54 | 1.16 | 0.81 *   |
| D14Ert436e    | DNA segment, Chr 14, ERATO Doi 436, expressed                                                     | 218978 | 0.61 | 0.51  | 0.44 | 1.37 | 0.76 ns  |
| Gpr125        | G protein-coupled receptor 125                                                                    | 70693  | 0.64 | 0.64  | 0.59 | 1.08 | -0.15 ns |
| Trim47        | tripartite motif protein 47                                                                       | 217333 | 1.30 | 1.16  | 1.41 | 0.91 | 0.40 ns  |
| Dhx38         | DEAH (Asp-Glu-Ala-His) box polypeptide 38                                                         | 64340  | 0.29 | 0.28  | 0.22 | 1.29 | 0.63 ns  |
| Ssrp1         | structure specific recognition protein 1                                                          | 20833  | 7.17 | 6.00  | 5.21 | 1.37 | 0.76 ns  |
| Ptprs         | protein tyrosine phosphatase, receptor type, S                                                    | 19280  | 3.41 | 4.01  | 3.20 | 1.06 | 0.48 ns  |
| Kpna6         | karyopherin (importin) alpha 6                                                                    | 16650  | 0.54 | 0.53  | 0.74 | 0.73 | -0.47 ns |
| Ppp1r15b      | protein phosphatase 1, regulatory (inhibitor) subunit 15b                                         | 108954 | 2.71 | 2.60  | 2.03 | 1.33 | 0.72 ns  |
| Rab8b         | RAB8B, member RAS oncogene family                                                                 | 235442 | 1.27 | 1.16  | 0.96 | 1.31 | 0.90 *   |
| Sept8         | septin 8                                                                                          | 20362  | 1.23 | 1.30  | 1.77 | 0.69 | -0.49 ns |
| Smarca4       | SWI/SNF related, matrix associated, actin dependent regulator of chromatin, subfamily a, member 4 | 20586  | 3.36 | 3.01  | 2.17 | 1.54 | 0.99 *** |
| Lgals3        | lectin, galactose binding, soluble 3                                                              | 16854  | 7.43 | 8.68  | 7.78 | 0.95 | 0.03 ns  |
| C430004E15Rik | RIKEN cDNA C430004E15 gene                                                                        | 97031  | 1.07 | 0.97  | 0.54 | 1.96 | 0.77 ns  |
| Jmjd1a        | jumonji domain containing 1A                                                                      | 104263 | 2.54 | 2.19  | 2.86 | 0.88 | -0.48 ns |
| Ppp2r5b       | protein phosphatase 2, regulatory subunit B (B56), beta isoform                                   | 225849 | 0.55 | 0.47  | 0.43 | 1.26 | 0.64 ns  |
| Ltv1          | LTV1 homolog (S. cerevisiae)                                                                      | 353258 | 1.04 | 1.02  | 0.93 | 1.11 | -0.22 ns |
| Mki67         |                                                                                                   | 17345  | 6.36 | 6.89  | 8.12 | 0.78 | 0.10 ns  |
| Hipk3         | homeodomain interacting protein kinase 3                                                          | 15259  | 4.86 | 3.06  | 3.20 | 1.51 | 0.45 ns  |
| 2610507B11Rik | RIKEN cDNA 2610507B11 gene                                                                        | 72503  | 2.38 | 2.30  | 2.04 | 1.16 | 0.07 ns  |
| Rhot2         | ras homolog gene family, member T2                                                                | 214952 | 0.45 | 0.38  | 0.22 | 2.00 | 0.58 ns  |
| Psme4         | proteasome (prosome, macropain) activator subunit 4                                               | 103554 | 2.35 | 2.28  | 3.66 | 0.64 | -0.85 *  |
| Fmn13         | formin-like 3                                                                                     | 22379  | 0.77 | 0.90  | 0.83 | 0.92 | -0.37 ns |
| Rbm16         | RNA binding motif protein 16                                                                      | 106583 | 1.69 | 1.37  | 0.96 | 1.75 | 0.63 ns  |
| 1300018I17Rik | RIKEN cDNA 1300018I17 gene                                                                        | 72325  | 0.38 | 0.40  | 0.26 | 1.45 | 0.74 ns  |
| Uimc1         | ubiquitin interaction motif containing 1                                                          | 20184  | 0.93 | 0.89  | 1.06 | 0.87 | -0.30 ns |
| Ahcy1         | S-adenosylhomocysteine hydrolase-like 1                                                           | 229709 | 5.71 | 5.21  | 5.19 | 1.10 | 0.29 ns  |
| Eif4g3        | eukaryotic translation initiation factor 4 gamma, 3                                               | 230861 | 0.81 | 0.83  | 0.76 | 1.06 | 0.08 ns  |
| D930015E06Rik | RIKEN cDNA D930015E06 gene                                                                        | 229473 | 0.60 | 0.54  | 0.35 | 1.71 | -0.12 ns |
| Metap1        | methionyl aminopeptidase 1                                                                        | 75624  | 4.48 | 4.87  | 3.37 | 1.32 | 0.20 ns  |
| Pold3         | polymerase (DNA-directed), delta 3, accessory subunit                                             | 67967  | 0.67 | 0.86  | 1.23 | 0.54 | -0.79 ns |
| Ythdf3        | YTH domain family 3                                                                               | 229096 | 2.37 | 2.52  | 2.46 | 0.96 | -0.62 ns |
| Pdcd2l        | programmed cell death 2-like                                                                      | 68079  | 0.34 | 0.34  | 0.38 | 0.89 | -0.73 ns |
| Cenpt         | centromere protein T                                                                              | 320394 | 0.71 | 0.67  | 0.75 | 0.94 | 0.33 ns  |
| Sec24b        | SEC24 related gene family, member B (S. cerevisiae)                                               | 99683  | 0.71 | 0.65  | 0.50 | 1.42 | 0.35 ns  |
| Set           | SET translocation                                                                                 | 56086  | 9.43 | 10.07 | 7.51 | 1.25 | 0.71 ns  |
| Hsd12         | hydroxysteroid dehydrogenase like 2                                                               | 72479  | 0.42 | 0.33  | 0.59 | 0.70 | -0.70 ns |
| Aftph         | aftiphilin                                                                                        | 216549 | 1.46 | 1.21  | 1.49 | 0.97 | -0.32 ns |
| Chst14        | carbohydrate (N-acetyl)galactosamine 4-0) sulfotransferase 14                                     | 72136  | 0.38 | 0.30  | 0.30 | 1.23 | 0.49 ns  |
| Fbxo33        | F-box protein 33                                                                                  | 70611  | 0.76 | 0.73  | 0.91 | 0.83 | -0.30 ns |
| Fcgbp         | Fc fragment of IgG binding protein                                                                | 215384 | 1.74 | 2.44  | 0.22 | 7.82 | 0.01 ns  |
| Jup           | junction plakoglobin                                                                              | 16480  | 1.68 | 1.58  | 1.77 | 0.94 | -0.58 ns |
| Edc4          | enhancer of mRNA decapping 4                                                                      | 234699 | 1.29 | 1.39  | 1.35 | 0.95 | 0.46 ns  |
| Srxn1         | sulfiredoxin 1 homolog (S. cerevisiae)                                                            | 76650  | 0.53 | 0.64  | 0.66 | 0.79 | -0.08 ns |
| Pbrm1         | polybromo 1                                                                                       | 66923  | 3.61 | 4.14  | 3.74 | 0.96 | 0.29 ns  |
| Etl4          | enhancer trap locus 4                                                                             | 208618 | 0.78 | 0.73  | 0.52 | 1.50 | -0.09 ns |
| Ube3c         | ubiquitin protein ligase E3C                                                                      | 100763 | 0.72 | 0.61  | 0.73 | 0.97 | -0.05 ns |
| Slc25a45      | solute carrier family 25, member 45                                                               | 107375 | 0.52 | 0.44  | 0.26 | 1.99 | 0.67 ns  |
| Rmnd5a        | required for meiotic nuclear division 5 homolog A (S. cerevisiae)                                 | 68477  | 2.37 | 2.15  | 2.16 | 1.09 | 0.54 ns  |
| Cln5          | ceroid-lipofuscinosis, neuronal 5                                                                 | 211286 | 0.61 | 0.59  | 0.61 | 1.00 | -0.21 ns |
| Rpap1         | RNA polymerase II associated protein 1                                                            | 68925  | 0.53 | 0.37  | 0.34 | 1.56 | 0.33 ns  |
| Zfp191        | zinc finger protein 191                                                                           | 59057  | 1.15 | 1.22  | 1.02 | 1.12 | 0.58 ns  |
| Rcc2          | regulator of chromosome condensation 2                                                            | 108911 | 0.78 | 0.88  | 0.91 | 0.86 | -0.34 ns |
| Map3k7ip1     | mitogen-activated protein kinase kinase kinase 7 interacting protein 1                            | 66513  | 0.37 | 0.44  | 0.43 | 0.87 | -0.02 ns |
| Tbc1d23       | TBC1 domain family, member 23                                                                     | 67581  | 0.60 | 0.70  | 0.62 | 0.96 | -0.41 ns |
| Jmjd1c        | jumonji domain containing 1C                                                                      | 108829 | 2.44 | 2.60  | 2.20 | 1.10 | -0.36 ns |
| Camta2        | calmodulin binding transcription activator 2                                                      | 216874 | 0.45 | 0.43  | 0.39 | 1.13 | 0.36 ns  |
| Coq6          | coenzyme Q6 homolog (yeast)                                                                       | 217707 | 0.48 | 0.54  | 0.72 | 0.66 | -0.66 ns |
| Fndc3a        | fibronectin type III domain containing 3a                                                         | 319448 | 1.48 | 1.42  | 3.55 | 0.42 | -0.88 *  |
| Dnajc10       | DnaJ (Hsp40) homolog, subfamily C, member 10                                                      | 66861  | 2.52 | 2.67  | 1.91 | 1.31 | 0.27 ns  |
| Dhx57         | DEAH (Asp-Glu-Ala-Asp/His) box polypeptide 57                                                     | 106794 | 0.56 | 0.52  | 0.46 | 1.21 | 0.88 *   |
| Pawr          | PRKC, apoptosis, WT1, regulator                                                                   | 114774 | 6.25 | 5.17  | 3.49 | 1.78 | 0.49 ns  |
| Dsc2          | desmocollin 2                                                                                     | 13506  | 0.59 | 0.82  | 0.70 | 0.85 | 0.17 ns  |

|               |                                                                              |        |       |       |       |      |          |
|---------------|------------------------------------------------------------------------------|--------|-------|-------|-------|------|----------|
| EG621205      |                                                                              | 621205 | 2.72  | 2.36  | 1.93  | 1.40 | 0.72 ns  |
| Rfwd2         |                                                                              | 26374  | 2.72  | 2.36  | 1.93  | 1.40 | 0.72 ns  |
| Marveld2      | MARVEL (membrane-associating) domain containing 2                            | 218518 | 0.60  | 0.94  | 0.99  | 0.61 | -0.80 ns |
| Scrn3         | secernin 3                                                                   | 74616  | 0.42  | 0.24  | 0.14  | 2.97 | 0.80 ns  |
| Itgb1         | integrin beta 1 (fibronectin receptor beta)                                  | 16412  | 4.00  | 3.14  | 2.96  | 1.35 | 0.72 ns  |
| Rc3h2         | ring finger and CCH-type zinc finger domains 2                               | 319817 | 2.41  | 2.63  | 2.27  | 1.06 | -0.39 ns |
| Plcg2         | phospholipase C, gamma 2                                                     | 234779 | 0.58  | 0.59  | 0.25  | 2.36 | 0.45 ns  |
| Oxsr1         | oxidative-stress responsive 1                                                | 108737 | 0.72  | 0.67  | 0.63  | 1.14 | 0.70 ns  |
| Nhsr1         | NHS-like 1                                                                   | 215819 | 0.68  | 0.58  | 0.42  | 1.60 | 0.39 ns  |
| LOC629242     |                                                                              | 629242 | 1.04  | 1.47  | 1.99  | 0.52 | -0.39 ns |
| Tsr2          | TSR2, 20S rRNA accumulation, homolog (S. cerevisiae)                         | 69499  | 0.35  | 0.36  | 0.47  | 0.75 | 0.21 ns  |
| Sid2          | SID1 transmembrane family, member 2                                          | 214597 | 1.01  | 0.73  | 0.73  | 1.37 | 0.77 ns  |
| Aim1          | absent in melanoma 1                                                         | 11630  | 0.39  | 0.49  | 0.21  | 1.81 | -0.17 ns |
| Ints1         | integrator complex subunit 1                                                 | 68510  | 0.63  | 0.79  | 0.69  | 0.90 | 0.01 ns  |
| Fbxw8         | F-box and WD-40 domain protein 8                                             | 231672 | 1.18  | 1.02  | 1.18  | 1.00 | 0.30 ns  |
| Tpr           | translocated promoter region                                                 | 108989 | 2.74  | 2.47  | 2.07  | 1.31 | 0.47 ns  |
| Crim1         | cysteine rich transmembrane BMP regulator 1 (chordin like)                   | 50766  | 0.45  | 0.40  | 0.22  | 2.05 | 0.72 ns  |
| Arhgap18      | Rho GTPase activating protein 18                                             | 73910  | 0.37  | 0.40  | 0.48  | 0.77 | -0.86 *  |
| Hmgb2l1       | high mobility group box 2-like 1                                             | 70823  | 0.90  | 0.87  | 0.83  | 1.08 | 0.57 ns  |
| Trim33        | tripartite motif protein 33                                                  | 94093  | 2.23  | 2.55  | 1.79  | 1.24 | 0.54 ns  |
| Col18a1       | procollagen, type XVIII, alpha 1                                             | 12822  | 3.92  | 3.46  | 2.06  | 1.89 | 0.70 ns  |
| Trp53bp1      | transformation related protein 53 binding protein 1                          | 27223  | 2.98  | 2.35  | 2.07  | 1.43 | 0.57 ns  |
| Phf20         | PHD finger protein 20                                                        | 228829 | 2.14  | 2.08  | 1.79  | 1.19 | 0.36 ns  |
| Pacs2         | phosphofurin acidic cluster sorting protein 2                                | 217893 | 1.61  | 1.84  | 1.28  | 1.25 | 0.66 ns  |
| 3110003A17Rik | RIKEN cDNA 3110003A17 gene                                                   | 73112  | 3.16  | 3.21  | 3.23  | 0.97 | -0.52 ns |
| Rap2a         | RAS related protein 2a                                                       | 76108  | 0.34  | 0.39  | 0.52  | 0.65 | -0.33 ns |
| Axin1         | axin 1                                                                       | 12005  | 1.40  | 1.31  | 0.90  | 1.54 | 0.94 **  |
| Rdh10         | retinol dehydrogenase 10 (all-trans)                                         | 98711  | 2.43  | 1.86  | 1.24  | 1.95 | 0.29 ns  |
| Trim23        | tripartite motif protein 23                                                  | 81003  | 0.44  | 0.50  | 0.89  | 0.49 | -0.91 *  |
| Sec24d        | SEC24 related gene family, member D (S. cerevisiae)                          | 69608  | 0.29  | 0.28  | 0.16  | 1.78 | 0.63 ns  |
| Os9           | amplified in osteosarcoma                                                    | 216440 | 0.62  | 0.67  | 0.67  | 0.93 | -0.27 ns |
| Usp47         | ubiquitin specific peptidase 47                                              | 74996  | 1.38  | 1.17  | 1.48  | 0.93 | 0.09 ns  |
| Klhl2         | kelch-like 2, Mayven (Drosophila)                                            | 77113  | 1.16  | 1.30  | 2.05  | 0.56 | -0.63 ns |
| MLXip         | MLX interacting protein                                                      | 208104 | 0.78  | 0.75  | 0.70  | 1.10 | 0.20 ns  |
| Flywch1       | FLYWCH-type zinc finger 1                                                    | 224613 | 0.59  | 0.46  | 0.31  | 1.90 | 0.94 **  |
| 2310067B10Rik | RIKEN cDNA 2310067B10 gene                                                   | 71947  | 0.32  | 0.36  | 0.41  | 0.78 | -0.55 ns |
| 2810485105Rik | RIKEN cDNA 2810485105 gene                                                   | 72826  | 2.54  | 2.05  | 1.04  | 2.43 | 0.95 **  |
| Xpr1          | xenotropic and polytropic retrovirus receptor 1                              | 19775  | 0.72  | 0.82  | 0.47  | 1.51 | 0.75 ns  |
| Phlpp         | PH domain and leucine rich repeat protein phosphatase                        | 98432  | 1.04  | 0.95  | 0.72  | 1.43 | 0.39 ns  |
| Zc3h14        | zinc finger CCH type containing 14                                           | 75553  | 3.35  | 2.99  | 2.92  | 1.14 | 0.90 *   |
| Plk2          | polo-like kinase 2 (Drosophila)                                              | 20620  | 2.89  | 3.93  | 3.22  | 0.89 | 0.00 ns  |
| Rapgef1       | Rap guanine nucleotide exchange factor (GEF) 1                               | 107746 | 0.49  | 0.40  | 0.35  | 1.41 | 0.72 ns  |
| Lama5         |                                                                              | 16776  | 1.80  | 1.95  | 1.74  | 1.03 | -0.42 ns |
| Lancl1        | LanC (bacterial lantibiotic synthetase component C)-like 1                   | 14768  | 1.16  | 1.16  | 0.91  | 1.28 | 0.92 **  |
| 4932438A13Rik |                                                                              | 229227 | 1.19  | 1.21  | 1.17  | 1.01 | -0.52 ns |
| Ddx42         | DEAD (Asp-Glu-Ala-Asp) box polypeptide 42                                    | 72047  | 0.68  | 0.69  | 0.65  | 1.06 | 0.71 ns  |
| Gtf3a         | general transcription factor III A                                           | 66596  | 2.38  | 2.32  | 2.78  | 0.85 | -0.38 ns |
| Ccdc52        | coiled-coil domain containing 52                                             | 212514 | 1.06  | 1.00  | 1.10  | 0.96 | -0.62 ns |
| Herc4         | hect domain and RLD 4                                                        | 67345  | 1.32  | 1.34  | 1.21  | 1.08 | 0.14 ns  |
| Dnmbp         | dynamitin binding protein                                                    | 71972  | 1.72  | 1.81  | 1.37  | 1.25 | 0.81 ns  |
| Slc39a14      | solute carrier family 39 (zinc transporter), member 14                       | 213053 | 1.15  | 1.28  | 1.71  | 0.67 | -0.89 *  |
| Eif4g1        | eukaryotic translation initiation factor 4, gamma 1                          | 208643 | 4.47  | 4.27  | 4.91  | 0.91 | -0.78 ns |
| Epn1          | epsin 1                                                                      | 13854  | 0.48  | 0.50  | 0.50  | 0.96 | -0.51 ns |
| Mdfic         | MyoD family inhibitor domain containing                                      | 16543  | 1.38  | 1.39  | 0.75  | 1.84 | 0.42 ns  |
| Mal2          | mal, T-cell differentiation protein 2                                        | 105853 | 5.93  | 6.39  | 6.95  | 0.85 | -0.68 ns |
| Grhl2         | grainyhead-like 2 (Drosophila)                                               | 252973 | 1.49  | 1.48  | 1.45  | 1.02 | -0.29 ns |
| Nup188        | nucleoporin 188                                                              | 227699 | 0.53  | 0.59  | 0.47  | 1.12 | 0.03 ns  |
| Smo           | smoothened homolog (Drosophila)                                              | 319757 | 1.15  | 1.13  | 1.07  | 1.07 | -0.24 ns |
| Tnks1bp1      | tankyrase 1 binding protein 1                                                | 228140 | 0.52  | 0.29  | 0.27  | 1.88 | 0.35 ns  |
| Eif4a1        | eukaryotic translation initiation factor 4A1                                 | 13681  | 12.47 | 11.32 | 12.51 | 0.99 | -0.45 ns |
| Mapk3         | mitogen activated protein kinase 3                                           | 26417  | 1.83  | 1.52  | 2.11  | 0.86 | -0.21 ns |
| Rbbp8         | retinoblastoma binding protein 8                                             | 225182 | 1.20  | 1.33  | 1.34  | 0.89 | 0.21 ns  |
| Scrib         | scribbled homolog (Drosophila)                                               | 105782 | 1.22  | 1.22  | 1.44  | 0.84 | -0.68 ns |
| Snx21         | sorting nexin family member 21                                               | 101113 | 0.27  | 0.35  | 0.32  | 0.84 | -0.64 ns |
| Lace1         | lactation elevated 1                                                         | 215951 | 0.38  | 0.40  | 0.23  | 1.64 | 0.56 ns  |
| Pcmdt2        | protein-L-isoaspartate (D-aspartate) O-methyltransferase domain containing 2 | 245867 | 0.64  | 0.62  | 0.66  | 0.96 | -0.51 ns |
| Snx19         | sorting nexin 19                                                             | 102607 | 0.40  | 0.46  | 0.29  | 1.37 | 0.74 ns  |
| 2610036D13Rik | RIKEN cDNA 2610036D13 gene                                                   | 75425  | 1.40  | 1.28  | 1.77  | 0.79 | -0.57 ns |
| Map4k5        | mitogen-activated protein kinase kinase kinase 5                             | 399510 | 2.15  | 2.20  | 2.16  | 0.99 | -0.50 ns |
| 2810432D09Rik | RIKEN cDNA 2810432D09 gene                                                   | 69961  | 0.55  | 0.50  | 0.45  | 1.21 | 0.42 ns  |
| Zbed4         | zinc finger, BED domain containing 4                                         | 223773 | 0.97  | 1.05  | 0.66  | 1.46 | 0.36 ns  |
| Pole2         | polymerase (DNA directed), epsilon 2 (p59 subunit)                           | 18974  | 1.17  | 1.48  | 1.59  | 0.73 | -0.47 ns |
| Cdcp1         | CUB domain containing protein 1                                              | 109332 | 1.31  | 1.34  | 1.37  | 0.95 | 0.35 ns  |
| Maz           | MYC-associated zinc finger protein (purine-binding transcription factor)     | 17188  | 0.80  | 0.51  | 0.57  | 1.41 | 0.23 ns  |
| Metrn         | meteorin, glial cell differentiation regulator                               | 70083  | 0.62  | 0.56  | 0.45  | 1.37 | 0.81 *   |
| 9530068E07Rik | RIKEN cDNA 9530068E07 gene                                                   | 213673 | 3.32  | 2.91  | 3.42  | 0.97 | 0.00 ns  |
| ORF61         | open reading frame 61                                                        | 216157 | 1.48  | 1.47  | 1.13  | 1.30 | 0.69 ns  |
| Raver1        | ribonucleoprotein, PTB-binding 1                                             | 71766  | 0.87  | 0.64  | 0.60  | 1.44 | 0.88 *   |
| Ttl           | tubulin tyrosine ligase                                                      | 69737  | 0.28  | 0.42  | 0.32  | 0.88 | 0.19 ns  |
| Setd1a        | SET domain containing 1A                                                     | 233904 | 0.55  | 0.66  | 0.65  | 0.84 | -0.34 ns |
| Zfp26         | zinc finger protein 26                                                       | 22688  | 1.28  | 1.11  | 0.88  | 1.44 | 0.77 ns  |
| Fbxo4         | F-box protein 4                                                              | 106052 | 0.27  | 0.28  | 0.38  | 0.71 | -0.50 ns |
| Lrrc41        | leucine rich repeat containing 41                                            | 230654 | 0.48  | 0.51  | 0.68  | 0.71 | -0.87 *  |
| Ptpn23        | protein tyrosine phosphatase, non-receptor type 23                           | 104831 | 0.62  | 0.64  | 0.65  | 0.95 | 0.44 ns  |
| Lrrc58        | leucine rich repeat containing 58                                            | 320184 | 3.40  | 3.32  | 3.75  | 0.90 | -0.54 ns |
| Lrp2          | low density lipoprotein receptor-related protein 2                           | 14725  | 0.64  | 0.62  | 0.09  | 7.21 | 0.34 ns  |

|               |                                                                              |        |       |       |       |      |          |
|---------------|------------------------------------------------------------------------------|--------|-------|-------|-------|------|----------|
| Sfrs12        | splicing factor, arginine/serine-rich 12                                     | 218543 | 0.91  | 1.16  | 1.20  | 0.75 | -0.75 ns |
| Jarid1b       | jumonji, AT rich interactive domain 1B (Rbp2 like)                           | 75605  | 0.80  | 0.72  | 0.63  | 1.25 | 0.14 ns  |
| F730047E07Rik | RIKEN cDNA F730047E07 gene                                                   | 212377 | 0.48  | 0.56  | 0.59  | 0.81 | -0.13 ns |
| Ascc2         | activating signal cointegrator 1 complex subunit 2                           | 75452  | 0.34  | 0.46  | 0.50  | 0.67 | -0.85 *  |
| Mrps30        | mitochondrial ribosomal protein S30                                          | 59054  | 0.70  | 0.92  | 1.10  | 0.64 | -0.68 ns |
| Pcf11         | cleavage and polyadenylation factor subunit homolog (S. cerevisiae)          | 74737  | 0.59  | 0.80  | 0.71  | 0.82 | -0.57 ns |
| Cenpf         | centromere protein F                                                         | 108000 | 3.49  | 3.65  | 3.03  | 1.15 | 0.73 ns  |
| Elk4          | ELK4, member of ETS oncogene family                                          | 13714  | 1.45  | 1.70  | 1.31  | 1.11 | 0.32 ns  |
| Sp7           | spastic paraplegia 7 homolog (human)                                         | 234847 | 0.52  | 0.50  | 0.45  | 1.15 | 0.72 ns  |
| Rlf           | rearranged L-myc fusion sequence                                             | 109263 | 0.58  | 0.59  | 0.85  | 0.68 | -0.43 ns |
| Odf1          | oral-facial-digital syndrome 1 gene homolog (human)                          | 237222 | 0.20  | 0.32  | 0.42  | 0.47 | -0.52 ns |
| Mrps33        | mitochondrial ribosomal protein S33                                          | 14548  | 1.04  | 1.16  | 1.46  | 0.71 | -0.74 ns |
| OTTMUSG000000 |                                                                              | 665211 | 0.74  | 1.03  | 0.88  | 0.84 | -0.31 ns |
| 16327         |                                                                              |        |       |       |       |      |          |
| AI428936      | expressed sequence AI428936                                                  | 233066 | 0.54  | 0.42  | 0.74  | 0.73 | -0.72 ns |
| Fyco1         | FYVE and coiled-coil domain containing 1                                     | 17281  | 0.48  | 0.52  | 0.56  | 0.86 | 0.26 ns  |
| Tmc4          | transmembrane channel-like gene family 4                                     | 353499 | 1.63  | 1.51  | 1.79  | 0.90 | -0.38 ns |
| Mef2a         | myocyte enhancer factor 2A                                                   | 17258  | 1.75  | 1.40  | 1.15  | 1.51 | 0.66 ns  |
| Brd8          | bromodomain containing 8                                                     | 78656  | 1.04  | 1.00  | 1.20  | 0.86 | -0.36 ns |
| Wnk4          | WNK lysine deficient protein kinase 4                                        | 69847  | 0.97  | 1.04  | 0.90  | 1.07 | -0.30 ns |
| Atr           | ataxia telangiectasia and Rad3 related                                       | 245000 | 0.67  | 0.57  | 0.74  | 0.90 | 0.23 ns  |
| Afg3l2        | AFG3(ATPase family gene 3)-like 2 (yeast)                                    | 69597  | 0.43  | 0.49  | 0.62  | 0.69 | -0.42 ns |
| Zfp451        | zinc finger protein 451                                                      | 98403  | 0.82  | 0.81  | 0.77  | 1.07 | 0.61 ns  |
| Ifnz          | interferon zeta                                                              | 319146 | 0.22  | 0.33  | 0.39  | 0.57 | -0.55 ns |
| Epn2          | epsin 2                                                                      | 13855  | 1.04  | 0.86  | 0.86  | 1.20 | 0.76 ns  |
| Hmgcr         | 3-hydroxy-3-methylglutaryl-Coenzyme A reductase                              | 15357  | 0.74  | 1.05  | 1.61  | 0.46 | -0.87 *  |
| Tshz1         | teashirt zinc finger family member 1                                         | 110796 | 0.86  | 0.93  | 0.76  | 1.12 | 0.48 ns  |
| Vangl1        | vang-like 1 (van gogh, Drosophila)                                           | 229658 | 1.20  | 1.28  | 0.77  | 1.56 | 0.76 ns  |
| Utx           | ubiquitously transcribed tetratricopeptide repeat gene, X chromosome         | 22289  | 0.61  | 0.66  | 0.84  | 0.72 | -0.69 ns |
| Papolg        | poly(A) polymerase gamma                                                     | 216578 | 0.46  | 0.40  | 0.37  | 1.24 | 0.62 ns  |
| Ttc15         | tetratricopeptide repeat domain 15                                           | 217449 | 0.55  | 0.46  | 0.82  | 0.66 | -0.57 ns |
| Arfgap1       | ADP-ribosylation factor GTPase activating protein 1                          | 228998 | 0.86  | 0.79  | 0.80  | 1.06 | 0.00 ns  |
| Whsc2         | Wolf-Hirschhorn syndrome candidate 2 (human)                                 | 24116  | 0.89  | 0.74  | 0.84  | 1.05 | 0.01 ns  |
| Atp2a2        | ATPase, Ca++ transporting, cardiac muscle, slow twitch 2                     | 11938  | 4.59  | 4.48  | 5.22  | 0.88 | -0.77 ns |
| Trim24        | tripartite motif protein 24                                                  | 21848  | 0.76  | 0.71  | 0.73  | 1.03 | -0.37 ns |
| Tpm3          | tropomyosin 3, gamma                                                         | 59069  | 7.52  | 9.23  | 7.78  | 0.96 | -0.28 ns |
| Wwc1          | WW, C2 and coiled-coil domain containing 1                                   | 211652 | 2.66  | 2.09  | 1.91  | 1.38 | 0.75 ns  |
| Bsd1          | BSD domain containing 1                                                      | 100383 | 0.60  | 0.55  | 0.56  | 1.07 | 0.19 ns  |
| Zbtb44        | zinc finger and BTB domain containing 44                                     | 235132 | 0.40  | 0.32  | 0.21  | 1.92 | 0.92 *   |
| Fxn           | frataxin                                                                     | 14297  | 0.63  | 0.65  | 0.57  | 1.09 | 0.63 ns  |
| Mll1          | myeloid/lymphoid or mixed-lineage leukemia 1                                 | 214162 | 1.14  | 0.93  | 0.86  | 1.32 | 0.87 *   |
| Mrpl9         | mitochondrial ribosomal protein L9                                           | 78523  | 2.05  | 2.21  | 1.64  | 1.24 | 0.08 ns  |
| Rps6ka3       | ribosomal protein S6 kinase polypeptide 3                                    | 110651 | 0.21  | 0.31  | 0.41  | 0.51 | -0.20 ns |
| Piga          | phosphatidylinositol glycan anchor biosynthesis, class A                     | 18700  | 0.41  | 0.46  | 0.56  | 0.73 | 0.20 ns  |
| Dysf          |                                                                              | 26903  | 1.34  | 1.36  | 1.22  | 1.10 | 0.30 ns  |
| Fer1l3        |                                                                              | 226101 | 1.34  | 1.36  | 1.22  | 1.10 | 0.30 ns  |
| Sfrs15        |                                                                              | 224432 | 0.46  | 0.49  | 0.53  | 0.87 | -0.40 ns |
| Fastkd1       | FAST kinase domains 1                                                        | 320720 | 0.42  | 0.27  | 0.22  | 1.88 | 0.79 ns  |
| Tubb2a        |                                                                              | 22151  | 1.09  | 1.46  | 1.30  | 0.83 | 0.30 ns  |
| Tubb2b        |                                                                              | 73710  | 1.09  | 1.46  | 1.30  | 0.83 | 0.30 ns  |
| Gtbbp6        | GTP binding protein 6 (putative)                                             | 107999 | 0.36  | 0.43  | 0.50  | 0.71 | -0.68 ns |
| Cda           | cytidine deaminase                                                           | 72269  | 0.23  | 0.28  | 0.42  | 0.54 | -0.72 ns |
| Suv39h1       | suppressor of variegation 3-9 homolog 1 (Drosophila)                         | 20937  | 0.62  | 0.77  | 0.91  | 0.68 | -0.01 ns |
| Chd6          | chromodomain helicase DNA binding protein 6                                  | 71389  | 0.72  | 0.64  | 0.69  | 1.04 | -0.36 ns |
| Arhgef16      | Rho guanine nucleotide exchange factor (GEF) 16                              | 230972 | 1.10  | 0.81  | 1.25  | 0.87 | -0.41 ns |
| Itgb4         | integrin beta 4                                                              | 192897 | 0.81  | 0.85  | 0.74  | 1.09 | 0.39 ns  |
| Csde1         | cold shock domain containing E1, RNA binding                                 | 229663 | 10.52 | 9.59  | 8.55  | 1.22 | 0.50 ns  |
| Trip11        | thyroid hormone receptor interactor 11                                       | 109181 | 2.48  | 2.57  | 2.41  | 1.02 | -0.03 ns |
| Hif1a         | hypoxia inducible factor 1, alpha subunit                                    | 15251  | 6.10  | 6.18  | 6.15  | 0.99 | -0.14 ns |
| Sfrs10        | splicing factor, arginine/serine-rich 10 (transformer 2 homolog, Drosophila) | 20462  | 5.99  | 6.10  | 6.85  | 0.87 | -0.69 ns |
| Prrt5         | protein arginine N-methyltransferase 5                                       | 27374  | 1.02  | 1.08  | 1.21  | 0.84 | -0.60 ns |
| App           | amyloid beta (A4) precursor protein                                          | 11820  | 19.11 | 15.32 | 14.04 | 1.35 | 0.68 ns  |
| Triobp        | TRIO and F-actin binding protein                                             | 110253 | 1.78  | 1.78  | 1.73  | 1.02 | 0.59 ns  |
| Rabep1        | rabaptin, RAB GTPase binding effector protein 1                              | 54189  | 0.46  | 0.28  | 0.30  | 1.53 | 0.55 ns  |
| Myo1b         | myosin IB                                                                    | 17912  | 0.19  | 0.37  | 0.35  | 0.56 | -0.82 *  |
| Pof1b         | premature ovarian failure 1B                                                 | 69693  | 0.07  | 0.38  | 1.05  | 0.06 | -0.94 ** |
| Cep152        | centrosomal protein 152                                                      | 99100  | 0.31  | 0.22  | 0.27  | 1.14 | 0.53 ns  |
| Sfrs2         | splicing factor, arginine/serine-rich 2 (SC-35)                              | 20382  | 9.25  | 8.85  | 7.52  | 1.22 | 0.77 ns  |
| Lama3         |                                                                              | 16774  | 0.35  | 0.39  | 0.41  | 0.85 | 0.01 ns  |
| Eppk1         | epiplakin 1                                                                  | 223650 | 2.48  | 2.51  | 2.75  | 0.90 | -0.17 ns |
| Gstz1         | glutathione transferase zeta 1 (maleylacetoacetate isomerase)                | 14874  | 0.58  | 0.65  | 0.65  | 0.89 | -0.43 ns |
| Ifit80        | intraflagellar transport 80 homolog (Chlamydomonas)                          | 68259  | 1.45  | 1.24  | 0.70  | 2.06 | 0.82 *   |
| Atp9a         | ATPase, class II, type 9A                                                    | 11981  | 0.72  | 0.71  | 0.81  | 0.89 | -0.04 ns |
| Tssc4         | tumor-suppressing subchromosomal transferable fragment 4                     | 56844  | 0.60  | 0.66  | 0.60  | 1.00 | 0.42 ns  |
| Tcf12         | transcription factor 12                                                      | 21406  | 2.89  | 2.62  | 2.35  | 1.22 | 0.91 *   |
| Nfib          | nuclear factor I/B                                                           | 18028  | 2.59  | 2.28  | 2.46  | 1.05 | 0.52 ns  |
| Tnip1         | TNFAIP3 interacting protein 1                                                | 57783  | 1.00  | 0.89  | 1.72  | 0.58 | -0.32 ns |
| Nfkb1         | nuclear factor of kappa light chain gene enhancer in B-cells 1, p105         | 18033  | 1.12  | 1.10  | 0.93  | 1.21 | 0.81 *   |
| Stil          | Scf/Tal1 interrupting locus                                                  | 20460  | 0.56  | 0.58  | 0.87  | 0.64 | -0.60 ns |
| Rrp1          | ribosomal RNA processing 1 homolog (S. cerevisiae)                           | 18114  | 2.42  | 2.82  | 2.27  | 1.06 | 0.36 ns  |
| 1200011M11Rik | RIKEN cDNA 1200011M11 gene                                                   | 74133  | 0.32  | 0.32  | 0.47  | 0.69 | -0.64 ns |
| Trp53         | transformation related protein 53                                            | 22059  | 1.47  | 1.29  | 1.29  | 1.13 | 0.37 ns  |
| Lcn2          | lipocalin 2                                                                  | 16819  | 1.58  | 3.20  | 4.36  | 0.36 | -0.77 ns |
| Rabac1        | Rab acceptor 1 (prenylated)                                                  | 14470  | 1.64  | 1.87  | 2.54  | 0.64 | -0.53 ns |
| Ctse          |                                                                              | 13034  | 0.33  | 0.30  | 0.23  | 1.46 | -0.08 ns |
| Rpl34         | ribosomal protein L34                                                        | 68436  | 25.65 | 23.47 | 17.98 | 1.42 | 0.92 **  |
| Zc3h15        | zinc finger CCCH-type containing 15                                          | 69082  | 2.01  | 1.83  | 1.79  | 1.12 | 0.23 ns  |



|               |                                                                                            |        |       |       |       |      |           |
|---------------|--------------------------------------------------------------------------------------------|--------|-------|-------|-------|------|-----------|
| 0610010O12Rik | RIKEN cDNA 0610010O12 gene                                                                 | 66060  | 3.11  | 3.28  | 3.78  | 0.82 | -0.26 ns  |
| 1810031K17Rik | RIKEN cDNA 1810031K17 gene                                                                 | 69171  | 1.11  | 1.29  | 0.87  | 1.27 | 0.08 ns   |
| Dnttip2       | deoxynucleotidyltransferase, terminal, interacting protein 2                               | 99480  | 1.21  | 1.37  | 1.12  | 1.08 | 0.08 ns   |
| Pold4         | polymerase (DNA-directed), delta 4                                                         | 69745  | 0.98  | 0.86  | 1.09  | 0.90 | -0.17 ns  |
| Pom121        | nuclear pore membrane protein 121                                                          | 107939 | 2.30  | 2.69  | 2.94  | 0.78 | -0.41 ns  |
| Spna2         | spectrin alpha 2                                                                           | 20740  | 7.06  | 6.22  | 4.19  | 1.67 | 0.79 ns   |
| Pmvk          | phosphomevalonate kinase                                                                   | 68603  | 0.66  | 0.82  | 0.77  | 0.85 | -0.53 ns  |
| 2310004N24Rik | RIKEN cDNA 2310004N24 gene                                                                 | 69535  | 0.64  | 0.74  | 0.71  | 0.90 | 0.00 ns   |
| Suds3         | suppressor of defective silencing 3 homolog (S. cerevisiae)                                | 71954  | 1.72  | 1.62  | 1.70  | 1.01 | 0.19 ns   |
| Rnf6          | ring finger protein (C3H2C3 type) 6                                                        | 74132  | 1.36  | 1.24  | 1.61  | 0.84 | -0.57 ns  |
| Mrps18c       | mitochondrial ribosomal protein S18C                                                       | 68735  | 2.19  | 2.12  | 2.22  | 0.98 | 0.31 ns   |
| Phpt1         | phosphohistidine phosphatase 1                                                             | 75454  | 2.94  | 3.15  | 2.01  | 1.46 | 0.60 ns   |
| 2410091C18Rik | RIKEN cDNA 2410091C18 gene                                                                 | 73694  | 0.53  | 0.45  | 0.42  | 1.27 | 0.63 ns   |
| 1810063B07Rik | RIKEN cDNA 1810063B07 gene                                                                 | 67509  | 0.28  | 0.36  | 0.51  | 0.55 | -0.64 ns  |
| 1110037F02Rik | RIKEN cDNA 1110037F02 gene                                                                 | 66185  | 0.61  | 0.60  | 0.71  | 0.86 | -0.11 ns  |
| Bnip1         | BCL2/adenovirus E1B interacting protein 1, NIP1                                            | 224630 | 0.48  | 0.39  | 0.43  | 1.12 | 0.54 ns   |
| 2410015M20Rik | RIKEN cDNA 2410015M20 gene                                                                 | 224904 | 3.81  | 3.91  | 2.51  | 1.51 | 0.66 ns   |
| Cbr3          | carbonyl reductase 3                                                                       | 109857 | 0.40  | 0.71  | 0.55  | 0.72 | -0.61 ns  |
| Rwdd1         | RWD domain containing 1                                                                    | 66521  | 2.35  | 2.47  | 2.67  | 0.87 | -0.81 *   |
| Tceb1         | transcription elongation factor B (SIII), polypeptide 1                                    | 67923  | 4.03  | 3.99  | 3.72  | 1.08 | -0.06 ns  |
| Stl7          | suppression of tumorigenicity 7-like                                                       | 229681 | 0.54  | 0.55  | 0.45  | 1.20 | 0.67 ns   |
| Ssbp3         | single-stranded DNA binding protein 3                                                      | 72475  | 1.00  | 0.94  | 0.67  | 1.47 | 0.56 ns   |
| Rhoq          | ras homolog gene family, member Q                                                          | 104215 | 1.19  | 1.13  | 0.63  | 1.88 | 0.27 ns   |
| Zmpste24      | zinc metalloproteinase, STE24 homolog (S. cerevisiae)                                      | 230709 | 1.62  | 1.41  | 1.38  | 1.17 | 0.66 ns   |
| Hscb          | HscB iron-sulfur cluster co-chaperone homolog (E. coli)                                    | 100900 | 0.59  | 0.52  | 0.52  | 1.13 | -0.05 ns  |
| Pdxk          | pyridoxal (pyridoxine, vitamin B6) kinase                                                  | 216134 | 2.08  | 1.22  | 0.83  | 2.49 | 0.46 ns   |
| Zfp294        | zinc finger protein 294                                                                    | 78913  | 1.00  | 1.04  | 1.25  | 0.80 | -0.86 *   |
| Deb1          | differentially expressed in B16F10 1                                                       | 26901  | 0.63  | 0.68  | 0.73  | 0.87 | -0.03 ns  |
| Abhd10        | abhydrolase domain containing 10                                                           | 213012 | 0.41  | 0.43  | 0.50  | 0.82 | -0.90 *   |
| Ccdc102a      |                                                                                            | 234582 | 0.36  | 0.42  | 0.25  | 1.42 | 0.78 ns   |
| Ssbp1         | single-stranded DNA binding protein 1                                                      | 381760 | 3.40  | 3.76  | 3.30  | 1.03 | 0.28 ns   |
| Zfp654        | zinc finger protein 654                                                                    | 72020  | 0.36  | 0.40  | 0.49  | 0.73 | -0.78 ns  |
| Cdc73         | Vcell division cycle 73, Paf1/RNA polymerase II complex component, homolog (S. cerevisiae) | 214498 | 1.32  | 1.53  | 0.89  | 1.48 | 0.51 ns   |
| 4933407C03Rik | RIKEN cDNA 4933407C03 gene                                                                 | 74440  | 0.34  | 0.37  | 0.37  | 0.90 | 0.01 ns   |
| Csad          | cysteine sulfenic acid decarboxylase                                                       | 246277 | 0.38  | 0.31  | 0.26  | 1.49 | 0.37 ns   |
| Syne2         | synaptic nuclear envelope 2                                                                | 319565 | 16.20 | 14.52 | 15.59 | 1.03 | -0.37 ns  |
| Safb2         | scaffold attachment factor B2                                                              | 224902 | 0.71  | 0.75  | 0.45  | 1.57 | 0.83 *    |
| Usp45         | ubiquitin specific peptidase 45                                                            | 77593  | 0.35  | 0.34  | 0.46  | 0.75 | -0.34 ns  |
| Rab12         | RAB12, member RAS oncogene family                                                          | 19328  | 0.82  | 0.65  | 0.36  | 2.23 | 0.92 *    |
| 1110007M04Rik | RIKEN cDNA 1110007M04 gene                                                                 | 68493  | 0.51  | 0.41  | 0.34  | 1.47 | 0.36 ns   |
| Lsm12         | LSM12 homolog (S. cerevisiae)                                                              | 268490 | 0.39  | 0.34  | 0.45  | 0.86 | 0.15 ns   |
| Tmem60        | transmembrane protein 60                                                                   | 212090 | 1.10  | 1.06  | 1.19  | 0.92 | -0.07 ns  |
| 3300001G02Rik | RIKEN cDNA 3300001G02 gene                                                                 | 78372  | 0.90  | 0.88  | 1.11  | 0.81 | -0.05 ns  |
| Erb2ip        | ErbB2 interacting protein                                                                  | 59079  | 2.58  | 3.43  | 4.03  | 0.64 | -0.93 **  |
| H2afv         | H2A histone family, member V                                                               | 77605  | 6.01  | 5.41  | 6.51  | 0.92 | 0.04 ns   |
| Tmbim4        | transmembrane BAX inhibitor motif containing 4                                             | 68212  | 0.81  | 0.69  | 0.90  | 0.89 | -0.37 ns  |
| Zmym1         | zinc finger, MYM domain containing 1                                                       | 68310  | 0.47  | 0.48  | 0.59  | 0.79 | -0.33 ns  |
| Hat1          | histone aminotransferase 1                                                                 | 107435 | 3.00  | 2.59  | 2.59  | 1.15 | 0.25 ns   |
| Ankrd46       | ankyrin repeat domain 46                                                                   | 68839  | 1.01  | 0.80  | 1.00  | 1.01 | 0.07 ns   |
| Ccdc120       | coiled-coil domain containing 120                                                          | 54648  | 0.32  | 0.53  | 1.01  | 0.31 | -0.62 ns  |
| Cdca7         | cell division cycle associated 7                                                           | 66953  | 0.84  | 0.92  | 0.59  | 1.41 | 0.34 ns   |
| 1110038D17Rik | RIKEN cDNA 1110038D17 gene                                                                 | 68778  | 0.45  | 0.45  | 0.40  | 1.11 | 0.00 ns   |
| Nup88         | nucleoporin 88                                                                             | 19069  | 1.69  | 1.58  | 2.04  | 0.83 | -0.52 ns  |
| Ndufb4        | NADH dehydrogenase (ubiquinone) 1 beta subcomplex 4                                        | 68194  | 3.46  | 3.37  | 3.94  | 0.87 | -0.50 ns  |
| Pgam5         | phosphoglycerate mutase family member 5                                                    | 72542  | 1.45  | 1.51  | 1.55  | 0.93 | -0.55 ns  |
| Klhl21        | kelch-like 21 (Drosophila)                                                                 | 242785 | 0.27  | 0.28  | 0.37  | 0.74 | -0.89 *   |
| Acsf5         | acyl-CoA synthetase long-chain family member 5                                             | 433256 | 4.18  | 4.94  | 4.26  | 0.98 | 0.04 ns   |
| 1110057K04Rik | RIKEN cDNA 1110057K04 gene                                                                 | 68832  | 1.35  | 1.40  | 1.45  | 0.93 | -0.55 ns  |
| Dnm1l         | dynamitin-1-like                                                                           | 74006  | 3.47  | 3.29  | 3.94  | 0.88 | -0.80 ns  |
| Ptcd3         | Pentatricopeptide repeat domain 3                                                          | 69956  | 0.67  | 0.87  | 0.81  | 0.83 | -0.57 ns  |
| Lamp2         | lysosomal-associated membrane protein 2                                                    | 16784  | 2.59  | 3.01  | 3.63  | 0.71 | -0.71 ns  |
| Ipo11         | importin 11                                                                                | 76582  | 0.51  | 0.81  | 0.79  | 0.65 | -0.54 ns  |
| Sfrs1         | splicing factor, arginine/serine-rich 1 (ASF/SF2)                                          | 110809 | 5.71  | 7.25  | 8.13  | 0.70 | -0.95 **  |
| Rnf38         | ring finger protein 38                                                                     | 73469  | 1.35  | 1.22  | 1.48  | 0.91 | -0.03 ns  |
| Adam10        | a disintegrin and metalloproteinase domain 10                                              | 11487  | 3.10  | 2.91  | 2.67  | 1.16 | 0.38 ns   |
| Tpx2          | TPX2, microtubule-associated protein homolog (Xenopus laevis)                              | 72119  | 1.63  | 1.91  | 1.87  | 0.87 | -0.13 ns  |
| 1300001I01Rik | RIKEN cDNA 1300001I01 gene                                                                 | 74148  | 0.43  | 0.49  | 0.56  | 0.76 | -0.99 *** |
| Vps11         | vacuolar protein sorting 11 (yeast)                                                        | 71732  | 0.51  | 0.49  | 0.44  | 1.15 | 0.73 ns   |
| Armet         | arginine-rich, mutated in early stage tumors                                               | 74840  | 2.14  | 2.25  | 2.41  | 0.88 | 0.16 ns   |
| Tmtc4         | transmembrane and tetratricopeptide repeat containing 4                                    | 70551  | 2.46  | 2.00  | 1.89  | 1.30 | 0.73 ns   |
| Dynl1t        | dynein light chain Tctex-type 1                                                            | 21648  | 10.51 | 9.46  | 8.04  | 1.30 | 0.96 **   |
| Fbxw9         | F-box and WD-40 domain protein 9                                                           | 68628  | 0.55  | 0.55  | 0.60  | 0.90 | -0.40 ns  |
| Gtf2e1        | general transcription factor II E, polypeptide 1 (alpha subunit)                           | 74197  | 1.09  | 1.15  | 1.30  | 0.83 | -0.74 ns  |
| Cdc42se1      | CDC42 small effector 1                                                                     | 57912  | 3.25  | 3.17  | 2.90  | 1.11 | 0.50 ns   |
| Coq9          | coenzyme Q9 homolog (yeast)                                                                | 67914  | 0.66  | 0.61  | 0.64  | 1.03 | 0.49 ns   |
| Arl8b         | ADP-ribosylation factor-like 8B                                                            | 67166  | 1.99  | 1.87  | 2.24  | 0.89 | -0.47 ns  |
| Pnpla2        | patatin-like phospholipase domain containing 2                                             | 66853  | 0.52  | 0.61  | 0.80  | 0.65 | -0.61 ns  |
| Acaa2         | acetyl-Coenzyme A acyltransferase 2 (mitochondrial 3-oxoacyl-Coenzyme A thiolase)          | 52538  | 2.21  | 2.49  | 1.77  | 1.24 | 0.53 ns   |
| Rpl18a        | Ribosomal protein L18A                                                                     | 76808  | 23.93 | 22.40 | 18.46 | 1.29 | 0.87 *    |
| Mrps10        | mitochondrial ribosomal protein S10                                                        | 64657  | 1.47  | 1.47  | 1.12  | 1.31 | 0.88 *    |
| Akt1s1        | AKT1 substrate 1 (proline-rich)                                                            | 67605  | 1.10  | 1.02  | 1.22  | 0.90 | -0.61 ns  |
| Ndufab1       | NADH dehydrogenase (ubiquinone) 1, alpha/beta subcomplex, 1                                | 70316  | 2.40  | 2.12  | 2.89  | 0.83 | -0.60 ns  |
| Chchd2        | coiled-coil-helix-coiled-coil-helix domain containing 2                                    | 14004  | 18.29 | 16.61 | 15.52 | 1.17 | 0.50 ns   |
| 4933421E11Rik | RIKEN cDNA 4933421E11 gene                                                                 | 321000 | 0.78  | 0.99  | 0.87  | 0.90 | -0.44 ns  |
| Sar1b         | SAR1 gene homolog B (S. cerevisiae)                                                        | 66397  | 3.09  | 2.78  | 3.61  | 0.85 | -0.37 ns  |

|               |                                                                                 |        |      |      |      |      |          |
|---------------|---------------------------------------------------------------------------------|--------|------|------|------|------|----------|
| Nudt9         | nudix (nucleoside diphosphate linked moiety X)-type motif 9                     | 74167  | 0.73 | 0.82 | 0.82 | 0.89 | -0.30 ns |
| Vps24         | vacuolar protein sorting 24 (yeast)                                             | 66700  | 0.48 | 0.53 | 0.72 | 0.66 | -0.78 ns |
| Mpz1          | myelin protein zero-like 1                                                      | 68481  | 1.23 | 1.25 | 0.72 | 1.69 | 0.37 ns  |
| Atg16l1       | autophagy-related 16-like 1 (yeast)                                             | 77040  | 0.47 | 0.38 | 0.36 | 1.31 | 0.82 *   |
| Zfp180        | zinc finger protein 180                                                         | 210135 | 0.28 | 0.34 | 0.46 | 0.60 | -0.60 ns |
| Prpf39        | PRP39 pre-mRNA processing factor 39 homolog (yeast)                             | 328110 | 1.20 | 1.01 | 1.32 | 0.90 | -0.39 ns |
| Eml2          | echinoderm microtubule associated protein like 2                                | 72205  | 0.58 | 0.53 | 0.67 | 0.86 | -0.23 ns |
| LOC433458     |                                                                                 | 433458 | 1.65 | 1.55 | 1.68 | 0.98 | 0.04 ns  |
| Trappc6b      | trafficking protein particle complex 6B                                         | 78232  | 2.26 | 2.34 | 3.07 | 0.74 | -0.67 ns |
| Ndufv2        | NADH dehydrogenase (ubiquinone) flavoprotein 2                                  | 72900  | 4.65 | 3.93 | 3.09 | 1.50 | 0.98 *** |
| Etfb          | electron transferring flavoprotein, beta polypeptide                            | 110826 | 1.43 | 1.46 | 1.37 | 1.04 | -0.17 ns |
| Prpsap1       | phosphoribosyl pyrophosphate synthetase-associated protein 1                    | 67763  | 2.63 | 2.56 | 2.21 | 1.18 | 0.85 *   |
| Kctd6         | potassium channel tetramerisation domain containing 6                           | 71393  | 0.61 | 0.61 | 0.63 | 0.97 | -0.47 ns |
| Cd47          | CD47 antigen (Rh-related antigen, integrin-associated signal transducer)        | 16423  | 2.78 | 2.84 | 3.49 | 0.79 | -0.82 *  |
| Slc25a1       | solute carrier family 25 (mitochondrial carrier, citrate transporter), member 1 | 13358  | 2.14 | 1.78 | 2.72 | 0.78 | -0.56 ns |
| Usp9x         | ubiquitin specific peptidase 9, X chromosome                                    | 22284  | 0.82 | 0.85 | 1.44 | 0.56 | -0.27 ns |
| 1200015F23Rik | RIKEN cDNA 1200015F23 gene                                                      | 67809  | 0.69 | 0.60 | 0.50 | 1.38 | 0.52 ns  |
| Tspan9        | tetraspanin 9                                                                   | 109246 | 0.98 | 1.05 | 0.78 | 1.25 | 0.84 *   |
| 2310036O22Rik | RIKEN cDNA 2310036O22 gene                                                      | 68544  | 3.65 | 3.80 | 3.39 | 1.07 | 0.46 ns  |
| 1810037C20Rik | RIKEN cDNA 1810037C20 gene                                                      | 66294  | 0.33 | 0.39 | 0.56 | 0.58 | -0.80 ns |
| Bcl7a         | B-cell CLL/lymphoma 7A                                                          | 77045  | 0.74 | 0.80 | 0.71 | 1.04 | -0.11 ns |
| Nsmce4a       | non-SMC element 4 homolog A (S. cerevisiae)                                     | 67872  | 2.26 | 2.16 | 2.46 | 0.91 | -0.06 ns |
| Tomm7         | translocase of outer mitochondrial membrane 7 homolog (yeast)                   | 66169  | 1.89 | 1.92 | 2.54 | 0.74 | -0.76 ns |
| 1600012H06Rik | RIKEN cDNA 1600012H06 gene                                                      | 67912  | 0.92 | 0.81 | 0.64 | 1.44 | 0.93 **  |
| EG628746      |                                                                                 | 628746 | 3.01 | 3.19 | 3.70 | 0.81 | -0.91 *  |
| Rybp          |                                                                                 | 56353  | 3.01 | 3.19 | 3.70 | 0.81 | -0.91 *  |
| 5730419I09Rik | RIKEN cDNA 5730419I09 gene                                                      | 74741  | 0.36 | 0.45 | 0.46 | 0.78 | -0.87 *  |
| Rest          | RE1-silencing transcription factor                                              | 19712  | 0.79 | 0.88 | 1.00 | 0.79 | -0.77 ns |
| Cpsf6         | cleavage and polyadenylation specific factor 6                                  | 432508 | 2.25 | 2.00 | 2.25 | 1.00 | -0.25 ns |
| Sdhd          | succinate dehydrogenase complex, subunit D, integral membrane protein           | 66925  | 2.33 | 1.72 | 1.74 | 1.34 | 0.78 ns  |
| Acbd5         | acyl-Coenzyme A binding domain containing 5                                     | 74159  | 1.66 | 1.74 | 1.42 | 1.16 | -0.13 ns |
| Ankrd16       | ankyrin repeat domain 16                                                        | 320816 | 0.48 | 0.45 | 0.41 | 1.16 | 0.46 ns  |
| 2310035K24Rik | RIKEN cDNA 2310035K24 gene                                                      | 69596  | 0.27 | 0.20 | 0.37 | 0.72 | -0.57 ns |
| 1700021K19Rik | RIKEN cDNA 1700021K19 gene                                                      | 224118 | 0.57 | 0.52 | 0.80 | 0.71 | -0.52 ns |
| Larp1         | La ribonucleoprotein domain family, member 1                                    | 73158  | 1.97 | 1.96 | 2.12 | 0.93 | -0.64 ns |
| Vps26b        | vacuolar protein sorting 26 homolog B (yeast)                                   | 69091  | 0.51 | 0.44 | 0.58 | 0.87 | 0.03 ns  |
| Nfx1          | nuclear transcription factor, X-box binding 1                                   | 74164  | 1.03 | 0.85 | 0.91 | 1.12 | -0.15 ns |
| Pygo2         | pygopus 2                                                                       | 68911  | 2.16 | 2.07 | 1.63 | 1.32 | 0.76 ns  |
| Smchd1        | SMC hinge domain containing 1                                                   | 74355  | 2.60 | 2.74 | 2.51 | 1.03 | 0.60 ns  |
| Chmp2b        | chromatin modifying protein 2B                                                  | 68942  | 2.53 | 2.93 | 3.32 | 0.76 | -0.93 ** |
| Purb          | Purine rich element binding protein B                                           | 19291  | 2.63 | 2.64 | 3.55 | 0.74 | -0.31 ns |
| Luc7l         | Luc7 homolog (S. cerevisiae)-like                                               | 66978  | 1.07 | 0.97 | 0.74 | 1.44 | 0.88 *   |
| Dynlrb1       | dynein light chain roadblock-type 1                                             | 67068  | 3.88 | 3.87 | 4.79 | 0.81 | -0.72 ns |
| 2010107E04Rik | RIKEN cDNA 2010107E04 gene                                                      | 70257  | 5.23 | 4.75 | 5.41 | 0.96 | -0.08 ns |
| Pxdn          | peroxidasin homolog (Drosophila)                                                | 69675  | 1.73 | 1.88 | 1.39 | 1.24 | 0.57 ns  |
| EG668559      |                                                                                 | 668559 | 6.78 | 7.03 | 5.77 | 1.17 | 0.36 ns  |
| LOC545592     |                                                                                 | 545592 | 6.78 | 7.03 | 5.77 | 1.17 | 0.36 ns  |
| LOC630401     |                                                                                 | 630401 | 6.78 | 7.03 | 5.77 | 1.17 | 0.36 ns  |
| Tceb2         | transcription elongation factor B (SIII), polypeptide 2                         | 67673  | 7.51 | 6.46 | 4.77 | 1.57 | 0.99 *** |
| Ppp2r1b       | protein phosphatase 2 (formerly 2A), regulatory subunit A (PR 65), beta isoform | 73699  | 0.93 | 0.85 | 0.91 | 1.01 | 0.47 ns  |
| Dhx40         | DEAH (Asp-Glu-Ala-His) box polypeptide 40                                       | 67487  | 0.97 | 0.88 | 1.02 | 0.95 | -0.28 ns |
| Glt8d1        | glycosyltransferase 8 domain containing 1                                       | 76485  | 1.47 | 1.52 | 1.35 | 1.08 | 0.21 ns  |
| Eif1b         | eukaryotic translation initiation factor 1B                                     | 68969  | 0.93 | 0.89 | 0.94 | 0.98 | 0.49 ns  |
| Abhd13        | abhydrolase domain containing 13                                                | 68904  | 0.55 | 0.68 | 0.78 | 0.70 | -0.54 ns |
| Otd6b         | OTU domain containing 6B                                                        | 72201  | 0.60 | 0.62 | 0.59 | 1.02 | -0.05 ns |
| Fip11l        | FIP1 like 1 (S. cerevisiae)                                                     | 66899  | 1.28 | 1.35 | 1.53 | 0.83 | -0.65 ns |
| Trub1         | TruB pseudouridine (psi) synthase homolog 1 (E. coli)                           | 72133  | 0.44 | 0.61 | 0.49 | 0.89 | -0.01 ns |
| Tbce          | tubulin-specific chaperone e                                                    | 70430  | 0.80 | 0.72 | 0.94 | 0.85 | -0.73 ns |
| Cyp2s1        | cytochrome P450, family 2, subfamily s, polypeptide 1                           | 74134  | 0.84 | 0.67 | 1.00 | 0.83 | -0.36 ns |
| 8430427H17Rik | RIKEN cDNA 8430427H17 gene                                                      | 329540 | 0.21 | 0.27 | 0.42 | 0.50 | -0.54 ns |
| 2900097C17Rik | RIKEN cDNA 2900097C17 gene                                                      | 347740 | 6.05 | 6.46 | 6.17 | 0.98 | -0.22 ns |
| Cul5          | cullin 5                                                                        | 75717  | 0.43 | 0.31 | 0.26 | 1.67 | 0.96 **  |
| Mipep         | mitochondrial intermediate peptidase                                            | 70478  | 0.56 | 0.35 | 0.41 | 1.37 | 0.42 ns  |
| Exosc8        | exosome component 8                                                             | 69639  | 2.95 | 2.73 | 2.42 | 1.21 | 0.89 *   |
| 2310022M17Rik | RIKEN cDNA 2310022M17 gene                                                      | 69556  | 1.81 | 1.78 | 1.94 | 0.93 | -0.22 ns |
| Polr2l        | polymerase (RNA) II (DNA directed) polypeptide L                                | 66491  | 1.43 | 1.41 | 1.60 | 0.89 | -0.20 ns |
| Dyrk1a        | dual-specificity tyrosine-(Y)-phosphorylation regulated kinase 1a               | 13548  | 1.01 | 0.99 | 1.39 | 0.72 | -0.86 *  |
| Specc1l       | SPECC1-like                                                                     | 74392  | 1.19 | 0.84 | 0.82 | 1.45 | 0.66 ns  |
| B930046C15Rik |                                                                                 | 544998 | 0.25 | 0.35 | 0.17 | 1.51 | 0.44 ns  |
| ENSMUSG00000  |                                                                                 | 545007 | 0.25 | 0.35 | 0.17 | 1.51 | 0.44 ns  |
| 068790        |                                                                                 |        |      |      |      |      |          |
| LOC544988     |                                                                                 | 544988 | 0.25 | 0.35 | 0.17 | 1.51 | 0.44 ns  |
| LOC666329     |                                                                                 | 666329 | 0.25 | 0.35 | 0.17 | 1.51 | 0.44 ns  |
| LOC666740     |                                                                                 | 666740 | 0.25 | 0.35 | 0.17 | 1.51 | 0.44 ns  |
| Mrp148        | mitochondrial ribosomal protein L48                                             | 52443  | 0.72 | 0.68 | 0.68 | 1.05 | 0.70 ns  |
| Esco2         | establishment of cohesion 1 homolog 2 (S. cerevisiae)                           | 71988  | 0.80 | 0.99 | 1.38 | 0.57 | -0.47 ns |
| Ddit4         | DNA-damage-inducible transcript 4                                               | 74747  | 2.40 | 1.86 | 2.26 | 1.06 | -0.33 ns |
| Zdhhc13       | zinc finger, DHHC domain containing 13                                          | 243983 | 0.95 | 0.85 | 1.42 | 0.66 | -0.66 ns |
| Pdrg1         | p53 and DNA damage regulated 1                                                  | 68559  | 0.62 | 0.53 | 0.57 | 1.08 | -0.21 ns |
| Ccdc6         | coiled-coil domain containing 6                                                 | 76551  | 1.56 | 1.23 | 1.17 | 1.33 | 0.67 ns  |
| Pcnp          | PEST proteolytic signal containing nuclear protein                              | 76302  | 5.73 | 5.21 | 6.17 | 0.92 | -0.51 ns |
| Ebna1bp2      | EBNA1 binding protein 2                                                         | 69072  | 0.68 | 0.84 | 0.88 | 0.77 | -0.65 ns |
| Fundc2        | FUN14 domain containing 2                                                       | 67391  | 1.99 | 1.35 | 1.88 | 1.05 | -0.31 ns |
| Pdlim7        | PDZ and LIM domain 7                                                            | 67399  | 2.22 | 2.32 | 1.94 | 1.14 | 0.23 ns  |
| Jmjd1b        | jumonji domain containing 1B                                                    | 277250 | 0.75 | 0.77 | 0.90 | 0.83 | -0.28 ns |
| Ndufb10       | NADH dehydrogenase (ubiquinone) 1 beta subcomplex, 10                           | 68342  | 3.11 | 2.76 | 2.28 | 1.36 | 0.70 ns  |

|               |                                                                                                   |        |       |       |       |      |          |
|---------------|---------------------------------------------------------------------------------------------------|--------|-------|-------|-------|------|----------|
| Hrsp12        | heat-responsive protein 12                                                                        | 15473  | 0.85  | 1.08  | 1.04  | 0.81 | -0.65 ns |
| Trak1         | trafficking protein, kinesin binding 1                                                            | 67095  | 0.59  | 0.60  | 0.55  | 1.07 | 0.70 ns  |
| Nup50         | nucleoporin 50                                                                                    | 18141  | 1.05  | 1.06  | 1.27  | 0.82 | -0.24 ns |
| Dopey2        | dopey family member 2                                                                             | 70028  | 0.54  | 0.51  | 0.57  | 0.93 | -0.62 ns |
| Ostm1         | osteopetrosis associated transmembrane protein 1                                                  | 14628  | 0.92  | 0.91  | 0.59  | 1.56 | 0.57 ns  |
| Scfd1         | sec1 family domain containing 1                                                                   | 76983  | 1.15  | 1.14  | 1.22  | 0.94 | -0.49 ns |
| Zfp655        | zinc finger protein 655                                                                           | 72611  | 0.74  | 0.81  | 0.92  | 0.80 | -0.74 ns |
| Rcor3         | REST corepressor 3                                                                                | 214742 | 0.88  | 0.96  | 0.61  | 1.43 | 0.55 ns  |
| Ppapdc2       | phosphatidic acid phosphatase type 2 domain containing 2                                          | 74411  | 0.60  | 0.61  | 0.58  | 1.03 | 0.67 ns  |
| Trafd1        | TRAF type zinc finger domain containing 1                                                         | 231712 | 0.43  | 0.40  | 0.48  | 0.89 | 0.31 ns  |
| Gzf1          | GNDF-inducible zinc finger protein 1                                                              | 74533  | 0.74  | 0.59  | 0.76  | 0.97 | 0.06 ns  |
| Ppm1m         | protein phosphatase 1M                                                                            | 67905  | 0.52  | 0.54  | 0.49  | 1.05 | 0.61 ns  |
| Foxk2         | forkhead box K2                                                                                   | 68837  | 1.07  | 1.15  | 1.44  | 0.74 | -0.29 ns |
| Scnm1         | sodium channel modifier 1                                                                         | 69269  | 1.02  | 1.05  | 0.89  | 1.14 | 0.28 ns  |
| Lonp1         | lon peptidase 1, mitochondrial                                                                    | 74142  | 2.40  | 2.66  | 2.26  | 1.06 | 0.61 ns  |
| 1600027N09Rik | RIKEN cDNA 1600027N09 gene                                                                        | 73247  | 0.34  | 0.41  | 0.42  | 0.80 | -0.74 ns |
| Arhgap21      | Rho GTPase activating protein 21                                                                  | 71435  | 2.53  | 2.24  | 1.79  | 1.41 | 0.31 ns  |
| St5           | suppression of tumorigenicity 5                                                                   | 76954  | 0.39  | 0.37  | 0.49  | 0.79 | -0.81 ns |
| Glce          | glucuronyl C5-epimerase                                                                           | 93683  | 0.89  | 0.76  | 0.49  | 1.81 | 0.88 *   |
| 0610007C21Rik | RIKEN cDNA 0610007C21 gene                                                                        | 381629 | 1.13  | 1.09  | 1.41  | 0.80 | -0.67 ns |
| 2700038C09Rik | RIKEN cDNA 2700038C09 gene                                                                        | 66496  | 1.07  | 0.95  | 1.26  | 0.84 | -0.77 ns |
| Smarcc2       | SWI/SNF related, matrix associated, actin dependent regulator of chromatin, subfamily c, member 2 | 68094  | 0.81  | 0.73  | 0.71  | 1.14 | 0.59 ns  |
| 2310021P13Rik | RIKEN cDNA 2310021P13 gene                                                                        | 268721 | 0.48  | 0.51  | 0.46  | 1.04 | 0.08 ns  |
| March8        | membrane-associated ring finger (C3HC4) 8                                                         | 71779  | 1.35  | 1.25  | 1.65  | 0.82 | -0.81 ns |
| Tnks2         | tankyrase, TRF1-interacting ankyrin-related ADP-ribose polymerase 2                               | 74493  | 8.92  | 9.31  | 7.13  | 1.24 | 0.84 *   |
| Wdr43         | WD repeat domain 43                                                                               | 72515  | 1.10  | 1.11  | 0.72  | 1.51 | 0.76 ns  |
| Smurf1        |                                                                                                   | 75788  | 0.33  | 0.35  | 0.63  | 0.53 | -0.79 ns |
| Zcchc3        | zinc finger, CCHC domain containing 3                                                             | 67917  | 0.95  | 0.96  | 0.93  | 1.02 | -0.14 ns |
| Hcfc1r1       | host cell factor C1 regulator 1 (XPO1-dependent)                                                  | 353502 | 4.31  | 4.68  | 3.38  | 1.27 | 0.60 ns  |
| Hnrpa0        | heterogeneous nuclear ribonucleoprotein A0                                                        | 77134  | 4.10  | 4.01  | 3.52  | 1.16 | 0.88 *   |
| D12Erd551e    | DNA segment, Chr 12, ERATO Doi 551, expressed                                                     | 52635  | 1.19  | 1.37  | 1.58  | 0.75 | -0.81 ns |
| Nat13         | N-acetyltransferase 13                                                                            | 72117  | 4.75  | 4.17  | 5.55  | 0.85 | -0.16 ns |
| 1700020I14Rik | RIKEN cDNA 1700020I14 gene                                                                        | 66602  | 2.78  | 2.18  | 1.92  | 1.44 | 0.60 ns  |
| Rnf113a2      | ring finger protein 113A2                                                                         | 66381  | 0.29  | 0.35  | 0.53  | 0.55 | -0.81 *  |
| 3110050N22Rik | RIKEN cDNA 3110050N22 gene                                                                        | 67306  | 1.14  | 1.14  | 0.81  | 1.40 | 0.33 ns  |
| 1200009I06Rik | RIKEN cDNA 1200009I06 gene                                                                        | 74190  | 0.25  | 0.35  | 0.62  | 0.40 | -0.85 *  |
| Glod4         | glyoxalase domain containing 4                                                                    | 67201  | 2.08  | 2.40  | 1.88  | 1.10 | 0.38 ns  |
| Pcgf3         | polycomb group ring finger 3                                                                      | 69587  | 1.49  | 1.40  | 1.25  | 1.18 | 0.82 *   |
| Tgfbp1        | transforming growth factor, beta receptor associated protein 1                                    | 73122  | 0.60  | 0.62  | 0.47  | 1.29 | 0.56 ns  |
| Abhd11        | abhydrolase domain containing 11                                                                  | 68758  | 0.95  | 0.97  | 1.06  | 0.89 | -0.36 ns |
| Hipk2         | homeodomain interacting protein kinase 2                                                          | 15258  | 0.66  | 0.87  | 0.54  | 1.22 | -0.19 ns |
| Lsm14a        | LSM14 homolog A (SCD6, S. cerevisiae)                                                             | 67070  | 3.57  | 2.61  | 2.75  | 1.29 | 0.71 ns  |
| Slc25a12      | solute carrier family 25 (mitochondrial carrier, Aralar), member 12                               | 78830  | 0.85  | 0.79  | 0.69  | 1.22 | -0.19 ns |
| Rap1gap       | Rap1 GTPase-activating protein                                                                    | 110351 | 0.34  | 0.21  | 0.36  | 0.94 | -0.41 ns |
| Yif1b         | Yip1 interacting factor homolog B (S. cerevisiae)                                                 | 77254  | 0.46  | 0.57  | 0.62  | 0.74 | -0.20 ns |
| Dync2li1      | dynein cytoplasmic 2 light intermediate chain 1                                                   | 213575 | 0.96  | 0.77  | 0.44  | 2.15 | 0.52 ns  |
| 2610034B18Rik | RIKEN cDNA 2610034B18 gene                                                                        | 70420  | 0.46  | 0.54  | 0.56  | 0.82 | -0.81 *  |
| Lrrc47        | leucine rich repeat containing 47                                                                 | 72946  | 0.81  | 1.01  | 1.01  | 0.80 | -0.64 ns |
| Nat12         | N-acetyltransferase 12                                                                            | 70646  | 0.92  | 0.99  | 1.05  | 0.88 | -0.36 ns |
| Ppp2r5e       | protein phosphatase 2, regulatory subunit B (B56), epsilon isoform                                | 26932  | 2.31  | 2.30  | 1.94  | 1.18 | 0.43 ns  |
| Tmem147       | transmembrane protein 147                                                                         | 69804  | 1.75  | 1.80  | 1.97  | 0.88 | -0.17 ns |
| Chd3          | chromodomain helicase DNA binding protein 3                                                       | 216848 | 0.87  | 0.93  | 0.54  | 1.60 | 0.60 ns  |
| Exoc2         | exocyst complex component 2                                                                       | 66482  | 0.60  | 0.61  | 0.63  | 0.95 | 0.27 ns  |
| Sorbs1        | sorbin and SH3 domain containing 1                                                                | 20411  | 0.69  | 0.74  | 0.80  | 0.86 | -0.62 ns |
| Ppp3cb        | protein phosphatase 3, catalytic subunit, beta isoform                                            | 19056  | 2.00  | 1.92  | 1.99  | 1.00 | 0.47 ns  |
| Reep4         | receptor accessory protein 4                                                                      | 72549  | 0.96  | 0.89  | 1.21  | 0.78 | -0.11 ns |
| Ospb3         | oxysterol binding protein-like 3                                                                  | 71720  | 1.86  | 1.86  | 2.31  | 0.80 | -0.52 ns |
| Pigk          | phosphatidylinositol glycan anchor biosynthesis, class K                                          | 329777 | 0.59  | 0.50  | 0.44  | 1.32 | 0.35 ns  |
| Zcrb1         | zinc finger CCHC-type and RNA binding motif 1                                                     | 67197  | 2.08  | 2.37  | 2.34  | 0.88 | -0.11 ns |
| C1galt1       | core 1 synthase, glycoprotein-N-acetylgalactosamine 3-beta-galactosyltransferase, 1               | 94192  | 0.54  | 0.75  | 1.09  | 0.49 | -0.73 ns |
| Commd10       | COMM domain containing 10                                                                         | 69456  | 0.55  | 0.56  | 0.69  | 0.80 | -0.05 ns |
| Sipa1i3       |                                                                                                   | 74206  | 0.80  | 1.22  | 0.86  | 0.92 | 0.04 ns  |
| Polr2i        | polymerase (RNA) II (DNA directed) polypeptide I                                                  | 69920  | 1.37  | 1.51  | 1.44  | 0.95 | -0.64 ns |
| Secisbp2      | SECIS binding protein 2                                                                           | 75420  | 0.48  | 0.32  | 0.51  | 0.93 | -0.18 ns |
| 1110051M20Rik | RIKEN cDNA 1110051M20 gene                                                                        | 228356 | 0.40  | 0.25  | 0.34  | 1.16 | -0.36 ns |
| Actr6         | ARP6 actin-related protein 6 homolog (yeast)                                                      | 67019  | 0.53  | 0.54  | 0.54  | 0.99 | -0.47 ns |
| Ccdc90b       | coiled-coil domain containing 90B                                                                 | 66365  | 1.00  | 1.06  | 1.22  | 0.81 | -0.50 ns |
| Atic          | 5-aminoimidazole-4-carboxamide ribonucleotide formyltransferase/IMP cyclohydrolase                | 108147 | 2.45  | 2.52  | 1.66  | 1.47 | 0.45 ns  |
| Hdh2          | haloacid dehalogenase-like hydrolase domain containing 2                                          | 76987  | 0.42  | 0.47  | 0.44  | 0.94 | 0.34 ns  |
| Tbc1d2b       | TBC1 domain family, member 2B                                                                     | 67016  | 0.39  | 0.43  | 0.29  | 1.36 | 0.76 ns  |
| Myo1e         | myosin IE                                                                                         | 71602  | 0.76  | 0.45  | 0.50  | 1.52 | 0.72 ns  |
| Lphn1         | latrophilin 1                                                                                     | 330814 | 0.28  | 0.34  | 0.55  | 0.51 | -0.09 ns |
| Phkg2         | phosphorylase kinase, gamma 2 (testis)                                                            | 68961  | 0.79  | 0.68  | 0.58  | 1.36 | 0.57 ns  |
| Calcoco1      | calcium binding and coiled coil domain 1                                                          | 67488  | 0.78  | 0.66  | 0.65  | 1.19 | -0.01 ns |
| Alkbh7        | alkB, alkylation repair homolog 7 (E. coli)                                                       | 66400  | 0.90  | 0.71  | 0.34  | 2.65 | 0.91 *   |
| Wdfy3         | WD repeat and FYVE domain containing 3                                                            | 72145  | 1.86  | 1.48  | 1.31  | 1.41 | 0.87 *   |
| Mllf1p        | myeloid leukemia factor 1 interacting protein                                                     | 71876  | 0.46  | 0.55  | 0.74  | 0.62 | -0.28 ns |
| 2610528E23Rik | RIKEN cDNA 2610528E23 gene                                                                        | 66497  | 0.95  | 1.13  | 1.03  | 0.92 | 0.39 ns  |
| 1110032A13Rik | RIKEN cDNA 1110032A13 gene                                                                        | 68731  | 0.53  | 0.57  | 0.56  | 0.95 | 0.31 ns  |
| Ttf2          | transcription termination factor, RNA polymerase II                                               | 74044  | 0.97  | 1.01  | 1.04  | 0.93 | 0.02 ns  |
| Lsmd1         | LSM domain containing 1                                                                           | 78304  | 1.77  | 2.29  | 2.59  | 0.68 | -0.75 ns |
| Snx7          | sorting nexin 7                                                                                   | 76561  | 0.46  | 0.56  | 0.55  | 0.83 | 0.09 ns  |
| 2810026P18Rik | RIKEN cDNA 2810026P18 gene                                                                        | 72655  | 0.89  | 1.45  | 0.70  | 1.27 | 0.31 ns  |
| EG629116      |                                                                                                   | 629116 | 16.98 | 17.78 | 15.30 | 1.10 | 0.27 ns  |

|               |                                                                                          |        |       |       |       |       |          |
|---------------|------------------------------------------------------------------------------------------|--------|-------|-------|-------|-------|----------|
| LOC677113     |                                                                                          | 677113 | 16.98 | 17.78 | 15.30 | 1.10  | 0.27 ns  |
| Ints7         | integrator complex subunit 7                                                             | 77065  | 1.72  | 1.51  | 1.34  | 1.27  | 0.19 ns  |
| D1Bwg0212e    | DNA segment, Chr 1, Brigham & Women's Genetics 0212 expressed                            | 52846  | 0.92  | 0.87  | 0.67  | 1.36  | 0.54 ns  |
| 2610207I05Rik | RIKEN cDNA 2610207I05 gene                                                               | 233789 | 0.93  | 0.86  | 1.14  | 0.81  | -0.36 ns |
| Pak4          | p21 (CDKN1A)-activated kinase 4                                                          | 70584  | 0.91  | 0.97  | 0.96  | 0.94  | -0.58 ns |
| Trmt11        | tRNA methyltransferase 11 homolog (S. cerevisiae)                                        | 73681  | 0.57  | 0.47  | 0.41  | 1.37  | 0.63 ns  |
| Glrx5         | glutaredoxin 5 homolog (S. cerevisiae)                                                   | 73046  | 2.80  | 3.02  | 2.95  | 0.94  | -0.02 ns |
| 1810035L17Rik | RIKEN cDNA 1810035L17 gene                                                               | 380773 | 2.23  | 2.54  | 3.14  | 0.71  | -0.62 ns |
| Setd2         | SET domain containing 2                                                                  | 235626 | 1.04  | 0.96  | 0.91  | 1.14  | 0.47 ns  |
| Pigy          | phosphatidylinositol glycan anchor biosynthesis, class Y                                 | 66459  | 0.61  | 0.75  | 0.65  | 0.93  | -0.40 ns |
| Xpo5          | exportin 5                                                                               | 72322  | 0.71  | 0.70  | 0.54  | 1.31  | 0.74 ns  |
| Zfp579        | zinc finger protein 579                                                                  | 68490  | 0.54  | 0.41  | 0.37  | 1.45  | 0.16 ns  |
| Unkl          | unkempt-like (Drosophila)                                                                | 74154  | 0.59  | 0.44  | 0.45  | 1.31  | 0.48 ns  |
| Basp1         | brain abundant, membrane attached signal protein 1                                       | 70350  | 8.26  | 9.33  | 14.38 | 0.57  | -0.35 ns |
| Chn2          | chimerin (chimaerin) 2                                                                   | 69993  | 0.51  | 0.42  | 0.45  | 1.12  | 0.30 ns  |
| Hif1an        | hypoxia-inducible factor 1, alpha subunit inhibitor                                      | 319594 | 0.89  | 1.01  | 0.78  | 1.13  | 0.60 ns  |
| Fmn12         | formin-like 2                                                                            | 71409  | 2.60  | 1.78  | 0.86  | 3.01  | 0.51 ns  |
| Blvra         | biliverdin reductase A                                                                   | 109778 | 1.09  | 0.99  | 0.91  | 1.19  | 0.16 ns  |
| Haghl         | hydroxyacylglutathione hydrolase-like                                                    | 68977  | 1.51  | 1.07  | 0.63  | 2.39  | 0.89 *   |
| Actn1         | actinin, alpha 1                                                                         | 109711 | 6.58  | 5.61  | 6.03  | 1.09  | 0.61 ns  |
| Tmem41b       | transmembrane protein 41B                                                                | 233724 | 0.66  | 0.65  | 0.75  | 0.88  | -0.51 ns |
| Mrpl41        | mitochondrial ribosomal protein L41                                                      | 107733 | 1.06  | 1.08  | 0.74  | 1.43  | 0.69 ns  |
| Usp38         | ubiquitin specific peptidase 38                                                          | 74841  | 0.39  | 0.38  | 0.38  | 1.01  | 0.37 ns  |
| 1700029F09Rik | RIKEN cDNA 1700029F09 gene                                                               | 75623  | 1.22  | 1.33  | 1.17  | 1.04  | 0.50 ns  |
| Garn1         | GTPase activating RANGAP domain-like 1                                                   | 56784  | 1.18  | 1.07  | 1.16  | 1.01  | 0.11 ns  |
| Tbc1d9b       | TBC1 domain family, member 9B                                                            | 76795  | 0.88  | 0.80  | 0.92  | 0.95  | -0.33 ns |
| Nin           | ninein                                                                                   | 18080  | 0.29  | 0.38  | 0.43  | 0.66  | -0.79 ns |
| LOC100036521  | hypothetical gene LOC100036521                                                           | #####  | 0.53  | 0.71  | 0.81  | 0.64  | -0.40 ns |
| Mylc2b        | myosin light chain, regulatory B                                                         | 67938  | 9.23  | 8.47  | 6.22  | 1.48  | 0.63 ns  |
| P2ry5         | purinergic receptor P2Y, G-protein coupled, 5                                            | 67168  | 0.68  | 0.58  | 0.79  | 0.86  | -0.66 ns |
| Zfp131        | zinc finger protein 131                                                                  | 72465  | 0.79  | 1.27  | 1.30  | 0.61  | -0.58 ns |
| Hcfc2         | host cell factor C2                                                                      | 67933  | 0.90  | 0.74  | 0.73  | 1.22  | 0.56 ns  |
| 2310005N03Rik | RIKEN cDNA 2310005N03 gene                                                               | 66359  | 1.39  | 1.33  | 1.09  | 1.27  | 0.88 *   |
| Ensa          | endosulfine alpha                                                                        | 56205  | 1.91  | 1.86  | 1.61  | 1.18  | 0.80 ns  |
| Vps25         | vacuolar protein sorting 25 (yeast)                                                      | 28084  | 1.86  | 1.51  | 2.16  | 0.86  | -0.27 ns |
| Plxna1        | plexin A1                                                                                | 18844  | 0.56  | 0.50  | 0.64  | 0.86  | -0.63 ns |
| Zfp518        | zinc finger protein 518                                                                  | 72672  | 0.58  | 0.79  | 0.51  | 1.13  | -0.19 ns |
| Uqcr2         | ubiquinol cytochrome c reductase core protein 2                                          | 67003  | 3.25  | 3.00  | 3.20  | 1.01  | 0.04 ns  |
| Steap2        | six transmembrane epithelial antigen of prostate 2                                       | 74051  | 1.49  | 1.55  | 1.81  | 0.82  | -0.86 *  |
| Dyrk2         | dual-specificity tyrosine-(Y)-phosphorylation regulated kinase 2                         | 69181  | 0.49  | 0.55  | 0.34  | 1.42  | 0.37 ns  |
| Lin9          | lin-9 homolog (C. elegans)                                                               | 72568  | 0.43  | 0.39  | 0.48  | 0.89  | -0.73 ns |
| Gnai3         | guanine nucleotide binding protein, alpha inhibiting 3                                   | 14679  | 5.00  | 5.01  | 3.93  | 1.26  | 0.66 ns  |
| LOC676870     | region containing RIKEN cDNA 2310056B04 gene; pre B-cell leukemia transcription factor 1 | 676870 | 1.44  | 1.45  | 1.13  | 1.27  | -0.03 ns |
| Cand1         | cullin associated and neddylation disassociated 1                                        | 71902  | 1.84  | 1.74  | 1.74  | 1.06  | -0.06 ns |
| Tns1          | tensin 1                                                                                 | 21961  | 2.28  | 0.99  | 0.58  | 3.92  | 0.84 *   |
| 0610010F05Rik | RIKEN cDNA 0610010F05 gene                                                               | 71675  | 0.79  | 0.77  | 0.76  | 1.03  | 0.22 ns  |
| 1200016B10Rik | RIKEN cDNA 1200016B10 gene                                                               | 66875  | 0.42  | 0.39  | 0.32  | 1.33  | 0.62 ns  |
| Rreb1         | ras responsive element binding protein 1                                                 | 68750  | 0.47  | 0.45  | 0.68  | 0.69  | -0.82 *  |
| EG628161      |                                                                                          | 628161 | 0.67  | 0.62  | 0.99  | 0.67  | -0.41 ns |
| LOC635999     |                                                                                          | 635999 | 0.67  | 0.62  | 0.99  | 0.67  | -0.41 ns |
| Pin4          |                                                                                          | 69713  | 0.67  | 0.62  | 0.99  | 0.67  | -0.41 ns |
| Nfkbil2       | nuclear factor of kappa light polypeptide gene enhancer in B-cells inhibitor-like 2      | 72749  | 0.80  | 0.87  | 1.01  | 0.79  | -0.32 ns |
| Maoa          | monoamine oxidase A                                                                      | 17161  | 0.59  | 0.61  | 0.03  | 17.44 | 0.71 ns  |
| Acbd3         | acyl-Coenzyme A binding domain containing 3                                              | 170760 | 0.81  | 0.73  | 0.79  | 1.03  | 0.04 ns  |
| 2200002D01Rik | RIKEN cDNA 2200002D01 gene                                                               | 72275  | 0.48  | 0.44  | 0.50  | 0.96  | -0.06 ns |
| Snrpf         | small nuclear ribonucleoprotein polypeptide F                                            | 69878  | 1.70  | 2.01  | 2.69  | 0.63  | -0.93 ** |
| Sympk         | symplekin                                                                                | 68188  | 0.68  | 0.80  | 1.38  | 0.49  | -0.71 ns |
| 1110049F12Rik | RIKEN cDNA 1110049F12 gene                                                               | 66193  | 0.69  | 0.78  | 0.87  | 0.79  | -0.76 ns |
| Wdr73         | WD repeat domain 73                                                                      | 71968  | 0.40  | 0.48  | 0.56  | 0.70  | -0.83 *  |
| 0610010K14Rik | RIKEN cDNA 0610010K14 gene                                                               | 104457 | 0.61  | 0.69  | 1.17  | 0.52  | -0.72 ns |
| Gm608         | gene model 608, (NCBI)                                                                   | 207806 | 1.39  | 1.23  | 1.67  | 0.83  | -0.52 ns |
| Zc3h6         | zinc finger CCCH type containing 6                                                       | 78751  | 0.22  | 0.20  | 0.48  | 0.45  | -0.55 ns |
| 1500001M20Rik | RIKEN cDNA 1500001M20 gene                                                               | 68971  | 0.64  | 0.64  | 0.66  | 0.97  | -0.21 ns |
| Zfp687        | zinc finger protein 687                                                                  | 78266  | 0.86  | 0.84  | 0.61  | 1.40  | 0.83 *   |
| Pdcd11        | programmed cell death protein 11                                                         | 18572  | 0.83  | 1.00  | 0.80  | 1.03  | 0.52 ns  |
| Tysnd1        | trypsin domain containing 1                                                              | 71767  | 0.32  | 0.39  | 0.37  | 0.85  | -0.44 ns |
| Chd2          | chromodomain helicase DNA binding protein 2                                              | 244059 | 1.15  | 0.98  | 1.08  | 1.05  | 0.49 ns  |
| Hddc3         | HD domain containing 3                                                                   | 68695  | 0.25  | 0.26  | 0.39  | 0.62  | -0.73 ns |
| 2310014G06Rik | RIKEN cDNA 2310014G06 gene                                                               | 654795 | 0.66  | 0.56  | 0.48  | 1.37  | 0.89 *   |
| Dpp8          | dipeptidylpeptidase 8                                                                    | 74388  | 0.53  | 0.45  | 0.37  | 1.43  | 0.96 **  |
| Prr6          | proline-rich polypeptide 6                                                               | 73139  | 0.09  | 0.14  | 0.39  | 0.24  | -0.62 ns |
| Ptms          | parathymosin                                                                             | 69202  | 4.96  | 4.13  | 4.61  | 1.07  | 0.48 ns  |
| Mrpl24        | mitochondrial ribosomal protein L24                                                      | 67707  | 3.43  | 3.92  | 3.12  | 1.10  | 0.04 ns  |
| Pgrmc2        | progesterone receptor membrane component 2                                               | 70804  | 1.84  | 1.77  | 1.35  | 1.36  | 0.79 ns  |
| Pex1          | peroxisome biogenesis factor 1                                                           | 71382  | 0.45  | 0.34  | 0.47  | 0.95  | -0.28 ns |
| Klhl28        | kelch-like 28 (Drosophila)                                                               | 66689  | 0.46  | 0.57  | 0.48  | 0.94  | 0.29 ns  |
| Pias2         | protein inhibitor of activated STAT 2                                                    | 17344  | 0.65  | 0.64  | 0.56  | 1.16  | 0.63 ns  |
| Ddx51         | DEAD (Asp-Glu-Ala-Asp) box polypeptide 51                                                | 69663  | 0.47  | 0.35  | 0.35  | 1.34  | 0.32 ns  |
| Usp54         | ubiquitin specific peptidase 54                                                          | 78787  | 0.55  | 0.43  | 0.56  | 0.96  | -0.27 ns |
| Gramd3        | GRAM domain containing 3                                                                 | 107022 | 0.57  | 0.46  | 0.32  | 1.80  | 0.02 ns  |
| D14Ert449e    | DNA segment, Chr 14, ERATO Doi 449, expressed                                            | 66039  | 2.55  | 2.77  | 2.24  | 1.13  | -0.17 ns |
| Bri3bp        | Bri3 binding protein                                                                     | 76809  | 0.84  | 0.72  | 0.80  | 1.05  | 0.17 ns  |
| Trspap1       | tRNA selenocysteine associated protein 1                                                 | 71787  | 0.88  | 0.96  | 1.15  | 0.76  | -0.63 ns |
| Dmx12         | Dmx-like 2                                                                               | 235380 | 0.27  | 0.23  | 0.20  | 1.35  | 0.50 ns  |
| Cdc42ep2      | CDC42 effector protein (Rho GTPase binding) 2                                            | 104252 | 0.71  | 0.61  | 0.46  | 1.54  | 0.62 ns  |

|               |                                                                                              |        |      |      |      |      |          |
|---------------|----------------------------------------------------------------------------------------------|--------|------|------|------|------|----------|
| Aasdhppt      | aminoadipate-semialdehyde dehydrogenase-phosphopantetheinyl transferase                      | 67618  | 0.66 | 0.68 | 0.27 | 2.44 | 0.79 ns  |
| Tmem86a       | transmembrane protein 86A                                                                    | 67893  | 0.35 | 0.28 | 0.23 | 1.52 | -0.04 ns |
| Ccdc49        | coiled-coil domain containing 49                                                             | 67480  | 0.47 | 0.38 | 0.50 | 0.94 | -0.02 ns |
| Map3k7ip3     | mitogen-activated protein kinase kinase kinase 7 interacting protein 3                       | 66724  | 0.76 | 0.71 | 1.03 | 0.73 | -0.78 ns |
| Smug1         | single-strand selective monofunctional uracil DNA glycosylase                                | 71726  | 0.67 | 0.73 | 0.74 | 0.89 | 0.25 ns  |
| Bcor          | Bcl6 interacting corepressor                                                                 | 71458  | 0.30 | 0.25 | 0.38 | 0.79 | -0.46 ns |
| 1110008L16Rik | RIKEN cDNA 1110008L16 gene                                                                   | 66132  | 0.43 | 0.61 | 0.58 | 0.74 | -0.72 ns |
| Zbtb41        | zinc finger and BTB domain containing 41 homolog                                             | 226470 | 1.53 | 1.26 | 1.11 | 1.37 | 0.59 ns  |
| Uqcrc1        | ubiquinol-cytochrome c reductase core protein 1                                              | 22273  | 3.74 | 3.37 | 3.54 | 1.05 | 0.61 ns  |
| Amot1         | angiominin-like 1                                                                            | 75723  | 1.76 | 1.30 | 0.65 | 2.72 | 0.86 *   |
| Ralgs2        | Ral GEF with PH domain and SH3 binding motif 2                                               | 78255  | 0.34 | 0.36 | 0.35 | 0.96 | -0.61 ns |
| Specc1        | sperm antigen with calponin homology and coiled-coil domains 1                               | 432572 | 0.98 | 0.99 | 1.19 | 0.82 | -0.25 ns |
| 1110021L09Rik | RIKEN cDNA 1110021L09 gene                                                                   | 76306  | 0.39 | 0.34 | 0.29 | 1.34 | -0.20 ns |
| Setd6         | SET domain containing 6                                                                      | 66083  | 0.50 | 0.54 | 0.62 | 0.81 | -0.71 ns |
| Pus7l         | pseudouridylylase 7 homolog (S. cerevisiae)-like                                             | 78895  | 0.48 | 0.44 | 0.36 | 1.35 | 0.32 ns  |
| Mfap3l        | microfibrillar-associated protein 3-like                                                     | 71306  | 1.92 | 1.53 | 1.43 | 1.34 | 0.61 ns  |
| Slc35e3       | solute carrier family 35, member E3                                                          | 215436 | 0.43 | 0.52 | 0.39 | 1.11 | 0.04 ns  |
| Csnk1g1       | casein kinase 1, gamma 1                                                                     | 214897 | 0.88 | 0.74 | 0.81 | 1.09 | 0.65 ns  |
| Mon2          | MON2 homolog (yeast)                                                                         | 67074  | 1.14 | 1.08 | 1.05 | 1.09 | -0.09 ns |
| Agpat2        | 1-acylglycerol-3-phosphate O-acyltransferase 2 (lysophosphatidic acid acyltransferase, beta) | 67512  | 1.43 | 1.51 | 1.11 | 1.28 | 0.23 ns  |
| Snx24         | sorting nexin 24                                                                             | 69226  | 1.17 | 1.36 | 1.02 | 1.14 | 0.49 ns  |
| Hddc2         | HD domain containing 2                                                                       | 69692  | 1.04 | 0.83 | 0.74 | 1.39 | 0.25 ns  |
| 2310003C23Rik | RIKEN cDNA 2310003C23 gene                                                                   | 76425  | 0.52 | 0.52 | 0.68 | 0.76 | -0.60 ns |
| Nr6a1         | nuclear receptor subfamily 6, group A, member 1                                              | 14536  | 0.47 | 0.45 | 0.26 | 1.80 | 0.62 ns  |
| Whsc1         | Wolf-Hirschhorn syndrome candidate 1 (human)                                                 | 107823 | 0.90 | 0.99 | 1.33 | 0.68 | -0.21 ns |
| Rpain         | RPA interacting protein                                                                      | 69723  | 0.56 | 0.53 | 0.64 | 0.86 | -0.04 ns |
| 1600002H07Rik | RIKEN cDNA 1600002H07 gene                                                                   | 72016  | 0.42 | 0.38 | 0.33 | 1.27 | 0.85 *   |
| Dusp4         | dual specificity phosphatase 4                                                               | 319520 | 0.54 | 0.77 | 1.37 | 0.40 | -0.91 *  |
| Myh14         |                                                                                              | 71960  | 0.36 | 0.68 | 1.26 | 0.28 | -0.88 *  |
| Klhl14        | kelch-like 14 (Drosophila)                                                                   | 225266 | 0.33 | 0.22 | 0.23 | 1.44 | 0.13 ns  |
| Wdr53         | WD repeat domain 53                                                                          | 68980  | 0.36 | 0.44 | 0.52 | 0.70 | -0.82 *  |
| Ngfrap1       | nerve growth factor receptor (TNFRSF16) associated protein 1                                 | 12070  | 5.60 | 5.73 | 6.98 | 0.80 | 0.24 ns  |
| March5        | membrane-associated ring finger (C3HC4) 5                                                    | 69104  | 3.63 | 3.82 | 3.41 | 1.06 | 0.42 ns  |
| Bclaf1        | BCL2-associated transcription factor 1                                                       | 72567  | 2.35 | 2.29 | 1.63 | 1.43 | 0.15 ns  |
| Macf1         | microtubule-actin crosslinking factor 1                                                      | 11426  | 1.50 | 1.41 | 1.59 | 0.94 | -0.74 ns |
| Cd99          | CD99 antigen                                                                                 | 673094 | 0.75 | 1.07 | 1.61 | 0.46 | -0.17 ns |
| 1300014I06Rik | RIKEN cDNA 1300014I06 gene                                                                   | 66895  | 0.31 | 0.37 | 0.45 | 0.68 | -0.20 ns |
| Ptch1         | patched homolog 1                                                                            | 19206  | 1.22 | 1.15 | 1.46 | 0.83 | -0.57 ns |
| Tmed8         | transmembrane emp24 domain containing 8                                                      | 382620 | 0.87 | 0.83 | 0.80 | 1.07 | 0.37 ns  |
| Sap130        | Sin3A associated protein, 130kDa                                                             | 269003 | 0.43 | 0.46 | 0.54 | 0.80 | -0.47 ns |
| Wdr70         | WD repeat domain 70                                                                          | 545085 | 0.45 | 0.39 | 0.40 | 1.12 | 0.26 ns  |
| Nolc1         | nucleolar and coiled-body phosphoprotein 1                                                   | 70769  | 1.20 | 1.87 | 1.19 | 1.00 | 0.26 ns  |
| 4121402D02Rik | RIKEN cDNA 4121402D02 gene                                                                   | 74026  | 1.56 | 1.30 | 1.55 | 1.01 | 0.00 ns  |
| 1110019N10Rik | RIKEN cDNA 1110019N10 gene                                                                   | 68523  | 2.07 | 2.07 | 2.52 | 0.82 | 0.08 ns  |
| Srp72         | signal recognition particle 72                                                               | 66661  | 2.25 | 2.13 | 2.32 | 0.96 | -0.47 ns |
| 0610038F07Rik | RIKEN cDNA 0610038F07 gene                                                                   | 66072  | 0.92 | 0.95 | 0.70 | 1.30 | 0.70 ns  |
| Klc1          | kinesin light chain 1                                                                        | 16593  | 0.55 | 0.62 | 0.59 | 0.93 | 0.27 ns  |
| Tmem57        | transmembrane protein 57                                                                     | 66146  | 1.39 | 1.34 | 1.46 | 0.94 | -0.27 ns |
| Rbbp5         | retinoblastoma binding protein 5                                                             | 213464 | 0.93 | 0.77 | 0.70 | 1.32 | 0.85 *   |
| Alkbh3        | alkB, alkylation repair homolog 3 (E. coli)                                                  | 69113  | 1.13 | 0.96 | 1.06 | 1.06 | -0.04 ns |
| Fem1c         | fem-1 homolog c (C.elegans)                                                                  | 240263 | 0.90 | 1.09 | 0.95 | 0.95 | 0.30 ns  |
| 9130213B05Rik | RIKEN cDNA 9130213B05 gene                                                                   | 231440 | 0.40 | 0.48 | 0.70 | 0.57 | -0.79 ns |
| Ppil1         | peptidylprolyl isomerase (cyclophilin)-like 1                                                | 68816  | 1.58 | 1.57 | 1.10 | 1.43 | 0.86 *   |
| 1300018J18Rik | RIKEN cDNA 1300018J18 gene                                                                   | 223776 | 0.34 | 0.38 | 0.45 | 0.75 | -0.56 ns |
| Mett5d1       | methyltransferase 5 domain containing 1                                                      | 76894  | 0.52 | 0.53 | 0.46 | 1.12 | 0.68 ns  |
| Rraga         | Ras-related GTP binding A                                                                    | 68441  | 0.98 | 0.81 | 0.97 | 1.00 | -0.08 ns |
| Gtf2h5        | general transcription factor IIH, polypeptide 5                                              | 66467  | 1.58 | 1.53 | 1.20 | 1.31 | 0.95 **  |
| Rbm25         | RNA binding motif protein 25                                                                 | 67039  | 3.01 | 3.38 | 3.31 | 0.90 | -0.40 ns |
| 2310022B05Rik | RIKEN cDNA 2310022B05 gene                                                                   | 69551  | 1.50 | 1.39 | 1.01 | 1.47 | 0.90 *   |
| Ttll4         | tubulin tyrosine ligase-like family, member 4                                                | 67534  | 0.54 | 0.45 | 0.46 | 1.16 | 0.31 ns  |
| Sirt5         | sirtuin 5 (silent mating type information regulation 2 homolog) 5 (S. cerevisiae)            | 68346  | 0.46 | 0.43 | 0.44 | 1.02 | 0.23 ns  |
| Fgfr1op       | Fgfr1 oncogene partner                                                                       | 75296  | 0.96 | 0.88 | 0.64 | 1.50 | 0.89 *   |
| Mocs3         | molybdenum cofactor synthesis 3                                                              | 69372  | 0.41 | 0.36 | 0.39 | 1.05 | -0.41 ns |
| Parp6         | poly (ADP-ribose) polymerase family, member 6                                                | 67287  | 0.41 | 0.24 | 0.26 | 1.57 | 0.72 ns  |
| Atp2b1        | ATPase, Ca++ transporting, plasma membrane 1                                                 | 67972  | 1.36 | 1.35 | 1.17 | 1.16 | -0.31 ns |
| Mt2           | metallothionein 2                                                                            | 17750  | 7.58 | 5.62 | 3.69 | 2.04 | 0.17 ns  |
| Xpot          | exportin, tRNA (nuclear export receptor for tRNAs)                                           | 73192  | 2.27 | 2.54 | 1.86 | 1.22 | 0.01 ns  |
| Otud7b        | OTU domain containing 7B                                                                     | 229603 | 0.58 | 0.87 | 0.69 | 0.84 | -0.08 ns |
| Sfrs16        | splicing factor, arginine/serine-rich 16 (suppressor-of-white-apricot homolog, Drosophila)   | 53609  | 0.30 | 0.31 | 0.45 | 0.67 | -0.63 ns |
| 2610204K14Rik | RIKEN cDNA 2610204K14 gene                                                                   | 67148  | 1.18 | 0.99 | 1.34 | 0.88 | -0.46 ns |
| Cep57         | centrosomal protein 57                                                                       | 74360  | 1.20 | 1.05 | 0.44 | 2.72 | 0.95 **  |
| D030074E01Rik | RIKEN cDNA D030074E01 gene                                                                   | 75964  | 1.46 | 1.37 | 1.75 | 0.83 | -0.05 ns |
| Ccny          | cyclin Y                                                                                     | 67974  | 0.81 | 0.81 | 0.89 | 0.90 | 0.23 ns  |
| Atad2b        | ATPase family, AAA domain containing 2B                                                      | 320817 | 2.55 | 2.61 | 3.02 | 0.84 | -0.44 ns |
| Ints12        | integrator complex subunit 12                                                                | 71793  | 0.75 | 0.72 | 0.48 | 1.55 | 0.61 ns  |
| Abcc3         | ATP-binding cassette, sub-family C (CFTR/MRP), member 3                                      | 76408  | 0.23 | 0.34 | 2.58 | 0.09 | -0.67 ns |
| Unc13d        | unc-13 homolog D (C. elegans)                                                                | 70450  | 0.23 | 0.28 | 0.41 | 0.56 | -0.31 ns |
| Phf23         | PHD finger protein 23                                                                        | 78246  | 1.43 | 1.54 | 1.58 | 0.90 | -0.63 ns |
| Phf3          | PHD finger protein 3                                                                         | 213109 | 2.02 | 1.76 | 1.53 | 1.31 | 0.30 ns  |
| Snw1          | SNW domain containing 1                                                                      | 66354  | 2.54 | 2.59 | 2.69 | 0.94 | -0.72 ns |
| Phip          | pleckstrin homology domain interacting protein                                               | 83946  | 2.08 | 2.11 | 1.62 | 1.28 | 0.82 *   |
| Mfhas1        | malignant fibrous histiocytoma amplified sequence 1                                          | 52065  | 2.22 | 2.24 | 1.63 | 1.35 | 0.88 *   |
| 1810074P20Rik | RIKEN cDNA 1810074P20 gene                                                                   | 67490  | 0.23 | 0.23 | 0.40 | 0.56 | -0.77 *  |

|               |                                                                                        |        |       |       |       |      |          |
|---------------|----------------------------------------------------------------------------------------|--------|-------|-------|-------|------|----------|
| Smcr8         | Smith-Magenis syndrome chromosome region, candidate 8 homolog (human)                  | 237782 | 0.41  | 0.37  | 0.42  | 0.97 | -0.07 ns |
| Pon2          | paraoxonase 2                                                                          | 330260 | 0.95  | 1.06  | 0.87  | 1.08 | -0.10 ns |
| Gcc1          | golgi coiled coil 1                                                                    | 74375  | 0.30  | 0.38  | 0.38  | 0.78 | -0.74 ns |
| Camsap11      | calmodulin regulated spectrin-associated protein 1-like 1                              | 67886  | 1.05  | 1.11  | 1.01  | 1.03 | -0.03 ns |
| Rtf1          | Rtf1, Paf1/RNA polymerase II complex component, homolog (S. cerevisiae)                | 76246  | 0.88  | 0.86  | 0.73  | 1.21 | 0.71 ns  |
| Bloc1s2       | biogenesis of lysosome-related organelles complex-1, subunit 2                         | 73689  | 1.76  | 1.95  | 1.51  | 1.16 | 0.68 ns  |
| Nuak2         | NUAK family, SNF1-like kinase, 2                                                       | 74137  | 2.43  | 2.28  | 1.29  | 1.87 | 0.63 ns  |
| Mrp147        | mitochondrial ribosomal protein L47                                                    | 74600  | 1.69  | 1.46  | 1.14  | 1.48 | 0.65 ns  |
| 4930506M07Rik | RIKEN cDNA 4930506M07 gene                                                             | 71653  | 2.13  | 2.40  | 2.27  | 0.93 | 0.00 ns  |
| Narg1l        | NMDA receptor regulated 1-like                                                         | 66897  | 0.51  | 0.46  | 0.64  | 0.79 | -0.43 ns |
| Tmem107       | transmembrane protein 107                                                              | 66910  | 3.40  | 4.17  | 4.89  | 0.69 | -0.38 ns |
| Kif16b        | kinesin family member 16B                                                              | 16558  | 0.77  | 0.85  | 0.92  | 0.83 | -0.63 ns |
| Dip2c         | DIP2 disco-interacting protein 2 homolog C (Drosophila)                                | 208440 | 0.32  | 0.45  | 0.40  | 0.79 | -0.16 ns |
| EG433125      |                                                                                        | 433125 | 19.00 | 18.76 | 17.27 | 1.09 | 0.52 ns  |
| LOC545423     |                                                                                        | 545423 | 19.00 | 18.76 | 17.27 | 1.09 | 0.52 ns  |
| LOC636855     |                                                                                        | 636855 | 19.00 | 18.76 | 17.27 | 1.09 | 0.52 ns  |
| LOC675278     |                                                                                        | 675278 | 19.00 | 18.76 | 17.27 | 1.09 | 0.52 ns  |
| LOC676253     |                                                                                        | 676253 | 19.00 | 18.76 | 17.27 | 1.09 | 0.52 ns  |
| LOC676590     |                                                                                        | 676590 | 19.00 | 18.76 | 17.27 | 1.09 | 0.52 ns  |
| Rpl21         |                                                                                        | 19933  | 19.00 | 18.76 | 17.27 | 1.09 | 0.52 ns  |
| Mphosph10     | M-phase phosphoprotein 10 (U3 small nucleolar ribonucleoprotein)                       | 67973  | 0.43  | 0.55  | 0.58  | 0.74 | -0.63 ns |
| Gcc2          | GRIP and coiled-coil domain containing 2                                               | 70297  | 1.86  | 1.68  | 1.28  | 1.44 | 0.47 ns  |
| Vezf1         | vascular endothelial zinc finger 1                                                     | 22344  | 3.01  | 2.60  | 2.50  | 1.20 | 0.82 *   |
| 2900026A02Rik | RIKEN cDNA 2900026A02 gene                                                             | 243219 | 2.20  | 2.15  | 1.93  | 1.13 | -0.12 ns |
| Vkorc111      | vitamin K epoxide reductase complex, subunit 1-like 1                                  | 69568  | 0.44  | 0.45  | 0.64  | 0.68 | -0.79 ns |
| Ddi2          | DNA-damage inducible protein 2                                                         | 68817  | 0.65  | 0.62  | 0.74  | 0.88 | -0.52 ns |
| Tomm22        | translocase of outer mitochondrial membrane 22 homolog (yeast)                         | 223696 | 2.69  | 2.43  | 2.91  | 0.92 | 0.10 ns  |
| Msl2l1        | male-specific lethal 2-like 1 (Drosophila)                                             | 77853  | 0.76  | 0.61  | 0.55  | 1.36 | 0.81 ns  |
| Tln2          |                                                                                        | 70549  | 0.26  | 0.37  | 0.13  | 1.99 | 0.40 ns  |
| lah1          | isoamyl acetate-hydrolyzing esterase 1 homolog (S. cerevisiae)                         | 67732  | 0.97  | 0.94  | 1.03  | 0.93 | -0.30 ns |
| 1700040I03Rik | RIKEN cDNA 1700040I03 gene                                                             | 73327  | 0.44  | 0.43  | 0.54  | 0.80 | -0.41 ns |
| Rab27a        | RAB27A, member RAS oncogene family                                                     | 11891  | 0.34  | 0.35  | 0.24  | 1.42 | 0.85 *   |
| Rexo1         | REX1, RNA exonuclease 1 homolog (S. cerevisiae)                                        | 66932  | 0.98  | 0.71  | 0.52  | 1.87 | 0.88 *   |
| Prei4         | preimplantation protein 4                                                              | 74182  | 0.60  | 0.46  | 0.48  | 1.23 | -0.06 ns |
| Nhlrc2        | NHL repeat containing 2                                                                | 66866  | 1.18  | 1.23  | 0.98  | 1.20 | 0.65 ns  |
| Gins3         | GINS complex subunit 3 (Psf3 homolog)                                                  | 78833  | 0.23  | 0.32  | 0.28  | 0.82 | 0.22 ns  |
| Ccdc77        | coiled-coil domain containing 77                                                       | 67200  | 0.29  | 0.37  | 0.46  | 0.64 | -0.14 ns |
| Wdr68         | WD repeat domain 68                                                                    | 71833  | 3.00  | 2.38  | 2.66  | 1.12 | 0.56 ns  |
| Slc35f2       | solute carrier family 35, member F2                                                    | 72022  | 0.38  | 0.30  | 0.16  | 2.30 | 0.74 ns  |
| 4933411K20Rik | RIKEN cDNA 4933411K20 gene                                                             | 66756  | 1.21  | 1.31  | 1.18  | 1.02 | 0.41 ns  |
| 2610036L11Rik | RIKEN cDNA 2610036L11 gene                                                             | 66311  | 0.61  | 0.58  | 0.70  | 0.86 | -0.50 ns |
| Clmn          | calmin                                                                                 | 90400  | 1.41  | 1.24  | 2.30  | 0.61 | -0.41 ns |
| Ccdc112       | coiled-coil domain containing 112                                                      | 240261 | 0.32  | 0.36  | 0.32  | 0.99 | 0.51 ns  |
| Ncapg         | on-SMC condensin I complex, subunit G                                                  | 54392  | 0.81  | 1.20  | 1.40  | 0.57 | -0.25 ns |
| Dnase1l1      | deoxyribonuclease 1-like 1                                                             | 69537  | 0.27  | 0.31  | 0.50  | 0.53 | -0.84 *  |
| Wdr34         | WD repeat domain 34                                                                    | 71820  | 0.57  | 0.52  | 0.38  | 1.47 | 0.28 ns  |
| Cox11         | COX11 homolog, cytochrome c oxidase assembly protein (yeast)                           | 69802  | 0.62  | 0.47  | 0.68  | 0.91 | -0.39 ns |
| Arsb          | arylsulfatase B                                                                        | 11881  | 0.99  | 1.62  | 1.65  | 0.60 | -0.86 *  |
| Dhx33         | DEAH (Asp-Glu-Ala-His) box polypeptide 33                                              | 216877 | 0.44  | 0.48  | 0.50  | 0.87 | -0.92 ** |
| Ankib1        | ankyrin repeat and IBR domain containing 1                                             | 70797  | 1.07  | 1.03  | 1.09  | 0.98 | 0.28 ns  |
| Tigd2         | tigger transposable element derived 2                                                  | 68140  | 0.40  | 0.37  | 0.40  | 1.00 | -0.55 ns |
| Saal1         | serum amyloid A-like 1                                                                 | 78935  | 0.43  | 0.50  | 0.61  | 0.70 | -0.76 ns |
| Camk2n2       | calcium/calmodulin-dependent protein kinase II inhibitor 2                             | 73047  | 1.03  | 0.94  | 0.81  | 1.27 | 0.85 *   |
| Mllt3         | myeloid/lymphoid or mixed lineage-leukemia translocation to 3 homolog (Drosophila)     | 70122  | 0.42  | 0.39  | 0.27  | 1.58 | 0.22 ns  |
| 1200009F10Rik | RIKEN cDNA 1200009F10 gene                                                             | 67454  | 0.38  | 0.42  | 0.29  | 1.29 | 0.44 ns  |
| Sept11        | septin 11                                                                              | 52398  | 3.94  | 3.47  | 2.98  | 1.32 | 0.97 **  |
| Stx16         | syntaxin 16                                                                            | 228960 | 2.21  | 2.07  | 2.57  | 0.86 | -0.67 ns |
| Stard4        | StAR-related lipid transfer (START) domain containing 4                                | 170459 | 1.77  | 1.72  | 1.52  | 1.16 | 0.58 ns  |
| 2610524H06Rik | RIKEN cDNA 2610524H06 gene                                                             | 330173 | 0.55  | 0.64  | 1.00  | 0.34 | -0.65 ns |
| 2810002N01Rik | RIKEN cDNA 2810002N01 gene                                                             | 68020  | 1.00  | 0.94  | 1.09  | 0.91 | 0.01 ns  |
| Dync2h1       | dynein cytoplasmic 2 heavy chain 1                                                     | 110350 | 0.40  | 0.30  | 0.16  | 2.48 | 0.98 *** |
| Prdm2         | PR domain containing 2, with ZNF domain                                                | 110593 | 0.50  | 0.46  | 0.48  | 1.04 | -0.23 ns |
| Zmym4         | zinc finger, MYM-type 4                                                                | 67785  | 0.39  | 0.34  | 0.37  | 1.05 | 0.52 ns  |
| 1190007I07Rik |                                                                                        | 544717 | 0.96  | 0.88  | 0.64  | 1.47 | 0.85 *   |
| 2210411K11Rik |                                                                                        | 664968 | 0.64  | 0.61  | 0.66  | 0.96 | -0.35 ns |
| Rassf6        | Ras association (RalGDS/AF-6) domain family 6                                          | 73246  | 1.75  | 1.95  | 3.01  | 0.58 | -0.79 ns |
| C030044B11Rik | RIKEN cDNA C030044B11 gene                                                             | 68128  | 1.04  | 0.84  | 0.68  | 1.52 | 0.63 ns  |
| Rnf130        | ring finger protein 130                                                                | 59044  | 0.76  | 0.96  | 1.72  | 0.44 | -0.57 ns |
| Syce2         | synaptonemal complex central element protein 2                                         | 71846  | 1.34  | 2.17  | 2.36  | 0.57 | -0.24 ns |
| Nubpl         | nucleotide binding protein-like                                                        | 76826  | 0.70  | 0.84  | 1.00  | 0.70 | -0.57 ns |
| Mobkl2b       | MOB1, Mps One Binder kinase activator-like 2B (yeast)                                  | 214944 | 0.72  | 0.58  | 0.72  | 0.99 | -0.44 ns |
| Psm1          | proteasome (prosome, macropain) 26S subunit, non-ATPase, 1                             | 70247  | 2.86  | 2.64  | 2.32  | 1.23 | 0.46 ns  |
| Trip13        | thyroid hormone receptor interactor 13                                                 | 69716  | 1.04  | 1.49  | 1.81  | 0.57 | -0.53 ns |
| Ddah1         | dimethylarginine dimethylaminohydrolase 1                                              | 69219  | 1.13  | 1.15  | 0.91  | 1.23 | -0.20 ns |
| Ube2q1        | ubiquitin-conjugating enzyme E2Q (putative) 1                                          | 70093  | 1.74  | 1.83  | 1.69  | 1.02 | -0.07 ns |
| Qk            | quaking                                                                                | 19317  | 3.65  | 3.61  | 2.43  | 1.50 | 0.70 ns  |
| Rnf149        | ring finger protein 149                                                                | 67702  | 2.90  | 2.89  | 2.46  | 1.17 | -0.04 ns |
| Cenpl         | centromere protein L                                                                   | 70454  | 0.28  | 0.32  | 0.37  | 0.74 | -0.37 ns |
| Nsfl1c        | NSFL1 (p97) cofactor (p47)                                                             | 386649 | 3.54  | 4.02  | 3.46  | 1.02 | 0.42 ns  |
| Snapc1        | small nuclear RNA activating complex, polypeptide 1                                    | 75627  | 0.20  | 0.22  | 0.25  | 0.79 | -0.59 ns |
| Sema3c        | sema domain, immunoglobulin domain (Ig), short basic domain, secreted, (semaphorin) 3C | 20348  | 10.40 | 10.97 | 11.22 | 0.92 | -0.68 ns |
| Klhl24        | kelch-like 24 (Drosophila)                                                             | 75785  | 1.19  | 0.94  | 0.88  | 1.34 | 0.04 ns  |
| 4930579G24Rik | RIKEN cDNA 4930579G24 gene                                                             | 75939  | 1.04  | 1.44  | 1.11  | 0.93 | 0.11 ns  |
| Wipi2         | WD repeat domain, phosphoinositide interacting 2                                       | 74781  | 1.14  | 0.91  | 0.90  | 1.26 | 0.79 ns  |

|               |                                                                                       |        |       |       |       |      |          |
|---------------|---------------------------------------------------------------------------------------|--------|-------|-------|-------|------|----------|
| Crtc2         | CREB regulated transcription coactivator 2                                            | 74343  | 0.34  | 0.40  | 0.27  | 1.24 | 0.47 ns  |
| Anapc10       | anaphase promoting complex subunit 10                                                 | 68999  | 1.30  | 1.10  | 1.22  | 1.06 | 0.32 ns  |
| Tomm40l       | translocase of outer mitochondrial membrane 40 homolog-like (yeast)                   | 641376 | 0.33  | 0.41  | 0.35  | 0.95 | 0.19 ns  |
| Csnk1g3       | casein kinase 1, gamma 3                                                              | 70425  | 0.83  | 0.97  | 0.91  | 0.91 | 0.27 ns  |
| Gstcd         | glutathione S-transferase, C-terminal domain containing                               | 67553  | 1.07  | 1.20  | 0.86  | 1.24 | 0.44 ns  |
| Eny2          | enhancer of yellow 2 homolog (Drosophila)                                             | 223527 | 1.13  | 0.93  | 0.85  | 1.32 | 0.36 ns  |
| Cpm           | carboxypeptidase M                                                                    | 70574  | 0.20  | 0.29  | 0.26  | 0.77 | -0.65 ns |
| Cdc14b        | CDC14 cell division cycle 14 homolog B (S. cerevisiae)                                | 218294 | 0.52  | 0.66  | 0.71  | 0.73 | -0.76 ns |
| Rnf139        | ring finger protein 139                                                               | 75841  | 2.28  | 1.69  | 1.46  | 1.55 | 0.92 **  |
| Tcf7l2        | transcription factor 7-like 2, T-cell specific, HMG-box                               | 21416  | 1.11  | 1.25  | 0.80  | 1.38 | 0.20 ns  |
| Ikzf5         | IKAROS family zinc finger 5                                                           | 67143  | 0.93  | 0.84  | 0.90  | 1.02 | -0.44 ns |
| Bat2d         | BAT2 domain containing 1                                                              | 226562 | 1.94  | 2.32  | 1.18  | 1.63 | 0.39 ns  |
| Prpf40a       | PRP40 pre-mRNA processing factor 40 homolog A (yeast)                                 | 56194  | 0.94  | 0.89  | 0.73  | 1.28 | 0.21 ns  |
| Rasl11a       | RAS-like, family 11, member A                                                         | 68895  | 0.30  | 0.35  | 0.74  | 0.40 | -0.52 ns |
| Sdccag1       | serologically defined colon cancer antigen 1                                          | 66244  | 2.63  | 2.91  | 3.56  | 0.74 | -0.72 ns |
| Mrpl55        | mitochondrial ribosomal protein L55                                                   | 67212  | 0.75  | 0.79  | 1.04  | 0.72 | -0.62 ns |
| Gapvd1        | GTPase activating protein and VPS9 domains 1                                          | 66691  | 3.02  | 2.89  | 1.95  | 1.54 | 0.74 ns  |
| 2410127L17Rik |                                                                                       | 67383  | 3.34  | 3.56  | 3.56  | 0.93 | -0.61 ns |
| Ints2         | integrator complex subunit 2                                                          | 70422  | 1.08  | 1.02  | 1.18  | 0.91 | -0.60 ns |
| 1200003107Rik | RIKEN cDNA 1200003107 gene                                                            | 66869  | 0.49  | 0.62  | 0.65  | 0.74 | -0.44 ns |
| Dnaj2         | DnaJ (Hsp40) homolog, subfamily A, member 2                                           | 56445  | 7.26  | 6.84  | 7.34  | 0.98 | 0.43 ns  |
| Utp11         | UTP11-like, U3 small nucleolar ribonucleoprotein, (yeast)                             | 67205  | 0.99  | 1.20  | 1.31  | 0.75 | -0.52 ns |
| Zdhhc21       | zinc finger, DHHC domain containing 21                                                | 68268  | 0.61  | 0.72  | 0.67  | 0.90 | 0.04 ns  |
| Rif1          |                                                                                       | 51869  | 1.83  | 1.74  | 1.52  | 1.20 | 0.32 ns  |
| Snx6          | sorting nexin 6                                                                       | 72183  | 2.19  | 2.31  | 2.42  | 0.90 | -0.60 ns |
| Fbxo5         | F-box protein 5                                                                       | 67141  | 1.60  | 1.67  | 1.56  | 1.02 | 0.47 ns  |
| 2900024C23Rik | RIKEN cDNA 2900024C23 gene                                                            | 67266  | 0.65  | 0.61  | 0.39  | 1.68 | 0.19 ns  |
| 2310057M21Rik | RIKEN cDNA 2310057M21 gene                                                            | 68277  | 0.35  | 0.39  | 0.46  | 0.75 | -0.75 ns |
| Ubr2          | ubiquitin protein ligase E3 component n-recognin 2                                    | 224826 | 1.08  | 1.17  | 0.67  | 1.59 | 0.84 *   |
| Fpgt          | fucose-1-phosphate guanylyltransferase                                                | 75540  | 0.52  | 0.61  | 0.72  | 0.73 | -0.92 *  |
| Alkbh8        | alkB, alkylation repair homolog 8 (E. coli)                                           | 67667  | 0.37  | 0.39  | 0.17  | 2.15 | 0.64 ns  |
| Rae1          | RAE1 RNA export 1 homolog (S. pombe)                                                  | 66679  | 2.19  | 2.10  | 2.19  | 1.00 | -0.13 ns |
| Tsen54        | tRNA splicing endonuclease 54 homolog (SEN54, S. cerevisiae)                          | 76265  | 0.38  | 0.36  | 0.37  | 1.00 | 0.34 ns  |
| Morc2a        | microrchidia 2A                                                                       | 74522  | 1.33  | 1.35  | 1.33  | 0.99 | -0.51 ns |
| Armc8         | armadillo repeat containing 8                                                         | 74125  | 0.57  | 0.57  | 0.57  | 1.00 | 0.48 ns  |
| 5730406M06Rik | RIKEN cDNA 5730406M06 gene                                                            | 66625  | 0.67  | 0.65  | 0.84  | 0.79 | -0.28 ns |
| Bcl2l13       | BCL2-like 13 (apoptosis facilitator)                                                  | 94044  | 0.57  | 0.59  | 0.57  | 0.98 | 0.41 ns  |
| Zfp777        | zinc finger protein 777                                                               | 72306  | 0.18  | 0.21  | 0.21  | 0.87 | -0.43 ns |
| Sdccag3       | serologically defined colon cancer antigen 3                                          | 68112  | 1.22  | 1.01  | 1.07  | 1.13 | 0.40 ns  |
| Mcm8          | minichromosome maintenance deficient 8 (S. cerevisiae)                                | 66634  | 0.35  | 0.44  | 0.57  | 0.61 | -0.36 ns |
| Larp7         | La ribonucleoprotein domain family, member 7                                          | 28036  | 1.91  | 2.30  | 1.48  | 1.28 | 0.56 ns  |
| Pcgf5         | polycomb group ring finger 5                                                          | 76073  | 1.65  | 1.57  | 1.58  | 1.04 | 0.63 ns  |
| Mlkl          | mixed lineage kinase domain-like                                                      | 74568  | 0.20  | 0.28  | 0.33  | 0.60 | -0.09 ns |
| Rbm34         | RNA binding motif protein 34                                                          | 52202  | 0.48  | 0.59  | 0.34  | 1.38 | 0.50 ns  |
| 2810474O19Rik | RIKEN cDNA 2810474O19 gene                                                            | 67246  | 1.37  | 1.56  | 1.18  | 1.15 | 0.55 ns  |
| 2700049A03Rik | RIKEN cDNA 2700049A03 gene                                                            | 76967  | 0.54  | 0.55  | 0.70  | 0.77 | -0.53 ns |
| Eml4          | echinoderm microtubule associated protein like 4                                      | 78798  | 1.24  | 1.06  | 0.87  | 1.42 | 0.60 ns  |
| Prpf18        | PRP18 pre-mRNA processing factor 18 homolog (yeast)                                   | 67229  | 0.63  | 0.63  | 0.50  | 1.25 | 0.58 ns  |
| Zfp91         | zinc finger protein 91                                                                | 109910 | 5.14  | 5.01  | 3.47  | 1.47 | 0.64 ns  |
| Cyld          | cylindromatosis (turban tumor syndrome)                                               | 74256  | 0.76  | 0.89  | 1.00  | 0.75 | -0.45 ns |
| 8430406I07Rik | RIKEN cDNA 8430406I07 gene                                                            | 74528  | 0.37  | 0.29  | 0.39  | 0.95 | 0.21 ns  |
| Ppil3         | peptidylprolyl isomerase (cyclophilin)-like 3                                         | 70225  | 1.10  | 1.06  | 0.80  | 1.37 | 0.42 ns  |
| Anub1         | AN1, ubiquitin-like, homolog (Xenopus laevis)                                         | 67492  | 0.50  | 0.49  | 0.50  | 1.00 | 0.40 ns  |
| Slc35a3       | solute carrier family 35 (UDP-N-acetylglucosamine (UDP-GlcNAc) transporter), member 3 | 229782 | 3.12  | 3.13  | 2.98  | 1.04 | -0.33 ns |
| Prrc1         | proline-rich coiled-coil 1                                                            | 73137  | 0.61  | 0.70  | 0.67  | 0.91 | 0.30 ns  |
| Gpsn2         | glycoprotein, synaptic 2                                                              | 106529 | 6.07  | 4.60  | 5.64  | 1.07 | 0.32 ns  |
| 1300003B13Rik | RIKEN cDNA 1300003B13 gene                                                            | 74149  | 0.92  | 0.85  | 0.53  | 1.72 | 0.69 ns  |
| Plaa          | phospholipase A2, activating protein                                                  | 18786  | 0.90  | 0.95  | 1.07  | 0.83 | -0.28 ns |
| Ndufa11       | NADH dehydrogenase (ubiquinone) 1 alpha subcomplex 11                                 | 69875  | 3.19  | 3.04  | 1.84  | 1.73 | 0.77 ns  |
| Pmpcb         | peptidase (mitochondrial processing) beta                                             | 73078  | 2.33  | 2.94  | 2.32  | 1.00 | 0.44 ns  |
| Foxp4         | forkhead box P4                                                                       | 74123  | 0.42  | 0.45  | 0.29  | 1.42 | 0.07 ns  |
| Zbtb4         | zinc finger and BTB domain containing 4                                               | 75580  | 0.91  | 0.86  | 0.90  | 1.00 | 0.31 ns  |
| 6330409N04Rik | RIKEN cDNA 6330409N04 gene                                                            | 66674  | 0.60  | 0.53  | 0.41  | 1.44 | 0.37 ns  |
| Prpf4         | PRP4 pre-mRNA processing factor 4 homolog (yeast)                                     | 70052  | 0.40  | 0.37  | 0.41  | 0.97 | 0.22 ns  |
| 4632434I11Rik | RIKEN cDNA 4632434I11 gene                                                            | 74041  | 0.32  | 0.38  | 0.34  | 0.95 | -0.38 ns |
| Patz1         | POZ (BTB) and AT hook containing zinc finger 1                                        | 56218  | 0.80  | 0.72  | 0.67  | 1.18 | -0.31 ns |
| Bbs5          | Bardet-Biedl syndrome 5 (human)                                                       | 72569  | 0.33  | 0.38  | 0.33  | 0.99 | -0.48 ns |
| Cnih4         | cornichon homolog 4 (Drosophila)                                                      | 98417  | 3.64  | 3.89  | 2.95  | 1.23 | 0.76 ns  |
| Tmtc2         | transmembrane and tetratricopeptide repeat containing 2                               | 278279 | 0.84  | 0.56  | 0.68  | 1.23 | -0.11 ns |
| 2610002D18Rik | RIKEN cDNA 2610002D18 gene                                                            | 69885  | 0.22  | 0.23  | 0.42  | 0.52 | -0.36 ns |
| Yaf2          | YY1 associated factor 2                                                               | 67057  | 1.47  | 1.52  | 1.76  | 0.83 | 0.00 ns  |
| 2310043J07Rik | RIKEN cDNA 2310043J07 gene                                                            | 69665  | 0.61  | 0.61  | 0.79  | 0.78 | -0.51 ns |
| Supt7l        | suppressor of Ty 7 (S. cerevisiae)-like                                               | 72195  | 0.50  | 0.37  | 0.38  | 1.33 | 0.80 ns  |
| 1700094D03Rik | RIKEN cDNA 1700094D03 gene                                                            | 73545  | 0.27  | 0.23  | 0.21  | 1.29 | -0.20 ns |
| Moph1         | microcephaly, primary autosomal recessive 1                                           | 244329 | 0.30  | 0.37  | 0.43  | 0.68 | 0.00 ns  |
| 2210011C24Rik | RIKEN cDNA 2210011C24 gene                                                            | 70134  | 0.61  | 0.69  | 0.45  | 1.35 | 0.75 ns  |
| 5330426P16Rik | RIKEN cDNA 5330426P16 gene                                                            | 68190  | 1.08  | 1.16  | 1.49  | 0.72 | -0.24 ns |
| Ttc19         | tetratricopeptide repeat domain 19                                                    | 72795  | 0.46  | 0.49  | 0.43  | 1.07 | 0.02 ns  |
| Akr1a4        | aldo-keto reductase family 1, member A4 (aldehyde reductase)                          | 58810  | 12.63 | 13.43 | 14.16 | 0.89 | -0.55 ns |
| Pqlc1         | PQ loop repeat containing 1                                                           | 66943  | 0.41  | 0.56  | 0.27  | 1.50 | 0.24 ns  |
| Reep6         | receptor accessory protein 6                                                          | 70335  | 2.65  | 2.19  | 2.06  | 1.28 | 0.06 ns  |
| Commdb        | COMM domain containing 8                                                              | 27784  | 0.85  | 0.80  | 0.85  | 1.00 | -0.41 ns |
| Tbc1d8b       | TBC1 domain family, member 8B                                                         | 245638 | 0.58  | 0.69  | 0.98  | 0.59 | -0.09 ns |
| Yars2         | tyrosyl-tRNA synthetase 2 (mitochondrial)                                             | 70120  | 0.33  | 0.29  | 0.46  | 0.70 | -0.74 ns |
| Dnase2a       | deoxyribonuclease II alpha                                                            | 13423  | 0.40  | 0.35  | 0.44  | 0.91 | -0.41 ns |
| Casc5         |                                                                                       | 76464  | 0.18  | 0.26  | 0.22  | 0.80 | 0.11 ns  |

|               |                                                                                  |        |       |       |       |      |           |
|---------------|----------------------------------------------------------------------------------|--------|-------|-------|-------|------|-----------|
| Stard3nl      | STARD3 N-terminal like                                                           | 76205  | 0.74  | 0.68  | 0.76  | 0.97 | 0.09 ns   |
| Dock5         | dedicator of cytokinesis 5                                                       | 68813  | 0.29  | 0.32  | 0.45  | 0.64 | -0.35 ns  |
| LOC677317     |                                                                                  | 677317 | 0.62  | 0.67  | 1.01  | 0.61 | -0.72 ns  |
| Uqcrq         | ubiquinol-cytochrome c reductase, complex III subunit VII                        | 22272  | 2.15  | 2.06  | 2.78  | 0.77 | -0.39 ns  |
| Glis3         | GLIS family zinc finger 3                                                        | 226075 | 2.25  | 2.63  | 1.77  | 1.26 | 0.24 ns   |
| 0610025P10Rik | RIKEN cDNA 0610025P10 gene                                                       | 216860 | 0.51  | 0.51  | 0.52  | 0.98 | -0.01 ns  |
| Mtch2         | mitochondrial carrier homolog 2 (C. elegans)                                     | 56428  | 2.61  | 2.01  | 2.12  | 1.23 | 0.16 ns   |
| Tmem79        | transmembrane protein 79                                                         | 71913  | 0.51  | 0.53  | 0.35  | 1.46 | 0.74 ns   |
| Mtx2          | metaxin 2                                                                        | 53375  | 1.95  | 1.76  | 1.39  | 1.39 | 0.48 ns   |
| Rnf167        | ring finger protein 167                                                          | 70510  | 2.03  | 1.59  | 2.15  | 0.94 | -0.27 ns  |
| Nmral1        | NmrA-like family domain containing 1                                             | 67824  | 0.37  | 0.39  | 0.25  | 1.47 | 0.56 ns   |
| Tsc22d2       | TSC22 domain family 2                                                            | 72033  | 1.54  | 1.42  | 0.98  | 1.56 | 0.78 ns   |
| Erh           | enhancer of rudimentary homolog (Drosophila)                                     | 13877  | 8.12  | 7.61  | 8.88  | 0.91 | -0.46 ns  |
| 2210013O21Rik | RIKEN cDNA 2210013O21 gene                                                       | 70123  | 0.65  | 0.67  | 0.52  | 1.24 | 0.65 ns   |
| EG433923      |                                                                                  | 433923 | 5.22  | 5.32  | 7.85  | 0.66 | -0.64 ns  |
| Zfp318        | zinc finger protein 318                                                          | 57908  | 0.56  | 0.58  | 0.39  | 1.43 | 0.74 ns   |
| Cdkn3         | cyclin-dependent kinase inhibitor 3                                              | 72391  | 0.50  | 0.64  | 0.74  | 0.67 | -0.19 ns  |
| Vgll3         | vestigial like 3 (Drosophila)                                                    | 73569  | 0.82  | 0.86  | 0.48  | 1.70 | 0.80 ns   |
| 4632415K11Rik | RIKEN cDNA 4632415K11 gene                                                       | 74347  | 0.30  | 0.27  | 0.24  | 1.25 | 0.01 ns   |
| 9030605104Rik |                                                                                  | 74548  | 2.29  | 2.28  | 0.58  | 3.95 | -0.16 ns  |
| Asnsd1        | asparagine synthetase domain containing 1                                        | 70396  | 1.98  | 1.91  | 1.46  | 1.35 | 0.56 ns   |
| Pla2g7        | phospholipase A2, group VII (platelet-activating factor acetylhydrolase, plasma) | 27226  | 2.02  | 1.70  | 0.98  | 2.05 | 0.92 **   |
| 5830427D03Rik | RIKEN cDNA 5830427D03 gene                                                       | 76061  | 1.03  | 1.01  | 1.03  | 0.99 | -0.43 ns  |
| Ndufa13       | NADH dehydrogenase (ubiquinone) 1 alpha subcomplex, 13                           | 67184  | 5.83  | 5.40  | 3.80  | 1.53 | 0.88 *    |
| Ankr24        | ankyrin repeat domain 24                                                         | 70615  | 0.29  | 0.33  | 0.30  | 0.98 | -0.44 ns  |
| Rmi1          | RMI1, RecQ mediated genome instability 1, homolog (S. cerevisiae)                | 74386  | 0.82  | 0.85  | 1.10  | 0.74 | -0.64 ns  |
| Nuf2          | NUF2, NDC80 kinetochore complex component, homolog (S. cerevisiae)               | 66977  | 1.23  | 1.21  | 1.21  | 1.01 | 0.37 ns   |
| Bbx           | bobby sox homolog (Drosophila)                                                   | 70508  | 0.68  | 0.71  | 0.72  | 0.94 | -0.27 ns  |
| Slc9a8        | solute carrier family 9 (sodium/hydrogen exchanger), member 8                    | 77031  | 0.44  | 0.40  | 0.33  | 1.35 | 0.12 ns   |
| 1810027O10Rik | RIKEN cDNA 1810027O10 gene                                                       | 69186  | 1.89  | 1.91  | 2.34  | 0.81 | -0.34 ns  |
| 9030025P20Rik | RIKEN cDNA 9030025P20 gene                                                       | #####  | 0.46  | 0.57  | 0.40  | 1.15 | 0.39 ns   |
| Peci          | peroxisomal delta3, delta2-enoyl-Coenzyme A isomerase                            | 23986  | 1.02  | 1.06  | 1.35  | 0.75 | -0.78 ns  |
| Agl           | amylase-1,6-glycosidase, 4-alpha-glucanotransferase                              | 77559  | 0.56  | 0.57  | 0.75  | 0.75 | -0.69 ns  |
| Lsm6          | LSM6 homolog, U6 small nuclear RNA associated (S. cerevisiae)                    | 78651  | 2.03  | 1.55  | 1.73  | 1.17 | 0.41 ns   |
| Ccdc50        | coiled-coil domain containing 50                                                 | 67501  | 0.28  | 0.32  | 0.42  | 0.66 | -0.79 ns  |
| Eif4enif1     | eukaryotic translation initiation factor 4E nuclear import factor 1              | 74203  | 1.39  | 1.42  | 1.50  | 0.92 | -0.22 ns  |
| Pcm1          | protein-L-isoaspartate (D-aspartate) O-methyltransferase 1                       | 18537  | 1.71  | 1.48  | 1.86  | 0.92 | -0.25 ns  |
| Spc24         | SPC24, NDC80 kinetochore complex component, homolog (S. cerevisiae)              | 67629  | 1.24  | 1.22  | 1.11  | 1.11 | 0.64 ns   |
| Hoxd8         | homeo box D8                                                                     | 15437  | 3.64  | 3.41  | 1.92  | 1.89 | 0.46 ns   |
| Tars2         | threonyl-tRNA synthetase 2, mitochondrial (putative)                             | 71807  | 0.84  | 0.80  | 0.76  | 1.10 | 0.79 ns   |
| 0610011F06Rik | RIKEN cDNA 0610011F06 gene                                                       | 68347  | 1.33  | 1.11  | 1.02  | 1.30 | 0.47 ns   |
| Cuedc2        | CUE domain containing 2                                                          | 67116  | 1.58  | 1.57  | 1.00  | 1.57 | 0.93 **   |
| Cpne8         | copine VIII                                                                      | 66871  | 0.99  | 1.13  | 0.35  | 2.83 | 0.41 ns   |
| Chmp4c        | chromatin modifying protein 4C                                                   | 66371  | 0.73  | 0.71  | 0.48  | 1.50 | 0.71 ns   |
| Rpl10a        | ribosomal protein L10A                                                           | 19896  | 20.43 | 17.99 | 14.61 | 1.39 | 0.74 ns   |
| Sox11         | SRY-box containing gene 11                                                       | 20666  | 0.71  | 0.69  | 1.60  | 0.44 | -0.82 *   |
| Btbd9         | BTB (POZ) domain containing 9                                                    | 224671 | 0.44  | 0.43  | 0.35  | 1.23 | 0.54 ns   |
| Cldnd1        | claudin domain containing 1                                                      | 224250 | 2.19  | 2.43  | 2.56  | 0.85 | -0.71 ns  |
| 2310014H01Rik | RIKEN cDNA 2310014H01 gene                                                       | 76448  | 0.76  | 0.77  | 0.68  | 1.11 | 0.61 ns   |
| 5830417H10Rik | RIKEN cDNA 5830417H10 gene                                                       | 76022  | 0.74  | 0.81  | 0.57  | 1.30 | 0.33 ns   |
| 1810055E12Rik | RIKEN cDNA 1810055E12 gene                                                       | 67894  | 0.58  | 0.69  | 0.51  | 1.13 | 0.41 ns   |
| Efh2          | EF hand domain containing 2                                                      | 27984  | 0.74  | 0.99  | 1.23  | 0.60 | -0.98 *** |
| Fars2         | phenylalanine-tRNA synthetase 2 (mitochondrial)                                  | 69955  | 0.68  | 0.57  | 0.57  | 1.18 | 0.23 ns   |
| 1110007C09Rik | RIKEN cDNA 1110007C09 gene                                                       | 68480  | 0.45  | 0.49  | 0.65  | 0.70 | -0.18 ns  |
| Parva         | parvin, alpha                                                                    | 57342  | 1.52  | 1.28  | 1.37  | 1.10 | -0.02 ns  |
| Grin1a        | glutamate receptor, ionotropic, N-methyl D-aspartate-like 1A                     | 28015  | 3.96  | 3.11  | 2.70  | 1.46 | 0.94 **   |
| Rai12         | retinoic acid induced 12                                                         | 54351  | 1.34  | 1.56  | 1.73  | 0.77 | -0.57 ns  |
| Dusp14        | dual specificity phosphatase 14                                                  | 56405  | 0.61  | 0.57  | 0.53  | 1.15 | 0.61 ns   |
| Med8          | mediator of RNA polymerase II transcription, subunit 8 homolog (yeast)           | 80509  | 0.91  | 1.12  | 1.41  | 0.64 | -0.74 ns  |
| Trim59        |                                                                                  | 66949  | 0.70  | 0.62  | 0.53  | 1.32 | 0.50 ns   |
| Hoxa10        | homeo box A10                                                                    | 15395  | 0.63  | 0.58  | 0.64  | 0.97 | -0.17 ns  |
| EG665989      |                                                                                  | 665989 | 1.03  | 0.90  | 1.13  | 0.91 | -0.01 ns  |
| LOC433064     |                                                                                  | 433064 | 1.03  | 0.90  | 1.13  | 0.91 | -0.01 ns  |
| LOC629952     |                                                                                  | 629952 | 1.03  | 0.90  | 1.13  | 0.91 | -0.01 ns  |
| LOC666411     |                                                                                  | 666411 | 1.03  | 0.90  | 1.13  | 0.91 | -0.01 ns  |
| Pp1h          |                                                                                  | 66101  | 1.03  | 0.90  | 1.13  | 0.91 | -0.01 ns  |
| 1810020G14Rik |                                                                                  | 66272  | 1.20  | 0.89  | 0.99  | 1.21 | 0.49 ns   |
| Anxa9         | annexin A9                                                                       | 71790  | 2.14  | 1.92  | 1.13  | 1.89 | 0.97 **   |
| Tsen34        | tRNA splicing endonuclease 34 homolog (SEN34, S. cerevisiae)                     | 66078  | 2.62  | 2.42  | 3.02  | 0.86 | -0.62 ns  |
| Dtnbp1        | dystrobrevin binding protein 1                                                   | 94245  | 0.93  | 1.01  | 0.96  | 0.96 | 0.00 ns   |
| Timm8b        | translocase of inner mitochondrial membrane 8 homolog b (yeast)                  | 30057  | 1.43  | 1.12  | 1.41  | 1.01 | 0.25 ns   |
| EG243642      |                                                                                  | 243642 | 23.74 | 20.88 | 15.63 | 1.51 | 0.92 **   |
| EG666668      |                                                                                  | 666668 | 23.74 | 20.88 | 15.63 | 1.51 | 0.92 **   |
| LOC639606     |                                                                                  | 639606 | 23.74 | 20.88 | 15.63 | 1.51 | 0.92 **   |
| LOC676958     |                                                                                  | 676958 | 23.74 | 20.88 | 15.63 | 1.51 | 0.92 **   |
| Irak1bp1      | interleukin-1 receptor-associated kinase 1 binding protein 1                     | 65099  | 0.36  | 0.48  | 0.27  | 1.32 | 0.59 ns   |
| Bxdc5         | brix domain containing 5                                                         | 70285  | 1.15  | 1.03  | 0.95  | 1.20 | -0.02 ns  |
| Stk11ip       | serine/threonine kinase 11 interacting protein                                   | 71728  | 0.48  | 0.49  | 0.31  | 1.55 | 0.79 ns   |
| Syde1         | synapse defective 1, Rho GTPase, homolog 1 (C. elegans)                          | 71709  | 0.38  | 0.36  | 0.15  | 2.47 | 0.62 ns   |
| D5Wsu178e     | DNA segment, Chr 5, Wayne State University 178, expressed                        | 28042  | 0.93  | 0.99  | 0.83  | 1.11 | -0.20 ns  |
| Sp3           | trans-acting transcription factor 3                                              | 20687  | 2.42  | 2.33  | 1.81  | 1.33 | 0.51 ns   |
| Fbxo34        | F-box protein 34                                                                 | 78938  | 0.35  | 0.44  | 0.49  | 0.71 | -0.58 ns  |
| Eps8l1        | EPS8-like 1                                                                      | 67425  | 0.38  | 0.44  | 0.32  | 1.20 | -0.40 ns  |
| Azi2          | 5-azacytidine induced gene 2                                                     | 27215  | 1.16  | 1.05  | 0.89  | 1.29 | 0.71 ns   |
| Tlk2          | tousled-like kinase 2 (Arabidopsis)                                              | 24086  | 1.09  | 0.90  | 0.78  | 1.40 | 0.89 *    |
| Rgl3          | ral guanine nucleotide dissociation stimulator-like 3                            | 71746  | 3.20  | 2.58  | 1.73  | 1.84 | 0.79 ns   |



|               |                                                                                           |        |       |       |       |      |          |
|---------------|-------------------------------------------------------------------------------------------|--------|-------|-------|-------|------|----------|
| Odf2l         | outer dense fiber of sperm tails 2-like                                                   | 52184  | 0.28  | 0.38  | 0.37  | 0.75 | -0.52 ns |
| E2f1          | E2F transcription factor 1                                                                | 13555  | 0.85  | 0.85  | 1.03  | 0.82 | 0.03 ns  |
| Mus81         | MUS81 endonuclease homolog (yeast)                                                        | 71711  | 0.33  | 0.29  | 0.35  | 0.95 | -0.62 ns |
| Plcd3         | phospholipase C, delta 3                                                                  | 72469  | 0.28  | 0.29  | 0.41  | 0.69 | -0.27 ns |
| Stag1         | stromal antigen 1                                                                         | 20842  | 0.95  | 0.89  | 0.93  | 1.02 | 0.39 ns  |
| Crls1         | cardiolipin synthase 1                                                                    | 66586  | 1.11  | 1.19  | 1.03  | 1.07 | 0.12 ns  |
| Rabl2a        | RAB, member of RAS oncogene family-like 2A                                                | 68708  | 0.88  | 0.79  | 0.61  | 1.43 | 0.50 ns  |
| Pmm2          | phosphomannomutase 2                                                                      | 54128  | 0.66  | 0.56  | 0.80  | 0.82 | -0.67 ns |
| Pank2         | pantothenate kinase 2 (Hallervorden-Spatz syndrome)                                       | 74450  | 0.90  | 0.74  | 0.95  | 0.94 | 0.24 ns  |
| Usp16         | ubiquitin specific peptidase 16                                                           | 74112  | 0.76  | 0.70  | 0.87  | 0.87 | -0.75 ns |
| Stampb        | Stam binding protein                                                                      | 70527  | 0.62  | 0.61  | 0.76  | 0.81 | -0.74 ns |
| Rnf41         | ring finger protein 41                                                                    | 67588  | 0.43  | 0.35  | 0.38  | 1.11 | 0.12 ns  |
| ldh3a         | isocitrate dehydrogenase 3 (NAD+) alpha                                                   | 67834  | 2.06  | 1.88  | 1.92  | 1.07 | 0.60 ns  |
| Artn          | artemin                                                                                   | 11876  | 0.17  | 0.26  | 0.24  | 0.67 | -0.49 ns |
| Vepf1         | ventricular zone expressed PH domain homolog 1 (zebrafish)                                | 72789  | 0.51  | 0.68  | 0.19  | 2.68 | 0.09 ns  |
| Ccdc132       | coiled-coil domain containing 132                                                         | 73288  | 0.85  | 0.82  | 0.86  | 0.99 | -0.32 ns |
| Zdhhc4        | zinc finger, DHHC domain containing 4                                                     | 72881  | 0.95  | 0.98  | 0.82  | 1.15 | -0.14 ns |
| Rchy1         | ring finger and CHY zinc finger domain containing 1                                       | 68098  | 1.34  | 1.30  | 1.34  | 1.00 | -0.48 ns |
| Trappc2       | trafficking protein particle complex 2                                                    | 66226  | 0.34  | 0.52  | 0.63  | 0.53 | 0.04 ns  |
| Gcsh          |                                                                                           | 68133  | 1.26  | 1.49  | 0.75  | 1.67 | 0.02 ns  |
| LOC674321     |                                                                                           | 674321 | 1.26  | 1.49  | 0.75  | 1.67 | 0.02 ns  |
| Mnat1         | menage a trois 1                                                                          | 17420  | 1.11  | 1.06  | 1.17  | 0.94 | -0.26 ns |
| Nup43         | nucleoporin 43                                                                            | 69912  | 0.77  | 0.74  | 0.66  | 1.16 | 0.54 ns  |
| Ccnl2         | cyclin L2                                                                                 | 56036  | 1.57  | 1.54  | 1.73  | 0.90 | -0.37 ns |
| Chmp5         | chromatin modifying protein 5                                                             | 76959  | 4.64  | 4.27  | 5.68  | 0.81 | -0.47 ns |
| Dcun1d5       | DCN1, defective in cullin neddylation 1, domain containing 5 (S. cerevisiae)              | 76863  | 1.35  | 1.13  | 0.61  | 2.21 | 0.96 **  |
| Cenpp         | centromere protein P                                                                      | 66336  | 0.46  | 0.55  | 0.47  | 0.99 | 0.45 ns  |
| Spr           | sepiapterin reductase                                                                     | 20751  | 0.40  | 0.58  | 0.52  | 0.78 | -0.37 ns |
| Ccdc21        | coiled-coil domain containing 21                                                          | 70012  | 0.32  | 0.51  | 0.16  | 1.94 | 0.55 ns  |
| Eapp          | E2F-associated phosphoprotein                                                             | 66266  | 1.21  | 1.38  | 1.74  | 0.70 | -0.68 ns |
| 2310005N01Rik | RIKEN cDNA 2310005N01 gene                                                                | 70088  | 0.47  | 0.51  | 0.53  | 0.88 | -0.21 ns |
| 2310057J16Rik | RIKEN cDNA 2310057J16 gene                                                                | 69697  | 1.35  | 1.30  | 1.28  | 1.05 | 0.09 ns  |
| Krtcap3       | keratinocyte associated protein 3                                                         | 69815  | 0.61  | 0.60  | 0.86  | 0.70 | -0.69 ns |
| 1700019E19Rik | RIKEN cDNA 1700019E19 gene                                                                | 76411  | 1.87  | 2.00  | 2.20  | 0.85 | -0.87 *  |
| Snf8          | SNF8, ESCRT-II complex subunit, homolog (S. cerevisiae)                                   | 27681  | 1.89  | 1.65  | 2.20  | 0.86 | -0.30 ns |
| Rfc3          | replication factor C (activator 1) 3                                                      | 69263  | 1.45  | 1.55  | 1.68  | 0.86 | -0.29 ns |
| Ubc           | ubiquitin C                                                                               | 22190  | 25.01 | 21.32 | 19.77 | 1.26 | 0.85 *   |
| Ywhaq         | tyrosine 3-monooxygenase/tryptophan 5-monooxygenase activation protein, theta polypeptide | 22630  | 11.73 | 12.19 | 13.71 | 0.85 | -0.92 ** |
| Fgd3          | FYVE, RhoGEF and PH domain containing 3                                                   | 30938  | 0.76  | 0.79  | 0.43  | 1.77 | 0.21 ns  |
| Mcm10         | minichromosome maintenance deficient 10 (S. cerevisiae)                                   | 70024  | 0.71  | 0.71  | 0.76  | 0.93 | 0.42 ns  |
| Tgm2          | transglutaminase 2, C polypeptide                                                         | 21817  | 0.06  | 0.04  | 0.47  | 0.12 | -0.75 ns |
| Pigs          | phosphatidylinositol glycan anchor biosynthesis, class S                                  | 276846 | 0.87  | 0.70  | 0.76  | 1.14 | -0.28 ns |
| Cdc23         | CDC23 (cell division cycle 23, yeast, homolog)                                            | 52563  | 0.31  | 0.45  | 0.45  | 0.69 | -0.35 ns |
| LOC672959     |                                                                                           | 672959 | 24.93 | 22.75 | 19.14 | 1.30 | 0.72 ns  |
| Rps12         |                                                                                           | 20042  | 24.93 | 22.75 | 19.14 | 1.30 | 0.72 ns  |
| Myst2         | MYST histone acetyltransferase 2                                                          | 217127 | 1.61  | 1.40  | 1.54  | 1.04 | 0.31 ns  |
| Thtpa         |                                                                                           | 105663 | 0.61  | 0.68  | 0.45  | 1.35 | 0.56 ns  |
| Cpne1         | copine 1                                                                                  | 266692 | 2.06  | 1.89  | 3.13  | 0.65 | -0.42 ns |
| Fbxl5         | F-box and leucine-rich repeat protein 5                                                   | 242960 | 1.26  | 1.22  | 1.87  | 0.67 | -0.79 ns |
| Klhl9         | kelch-like 9 (Drosophila)                                                                 | 242521 | 2.26  | 2.25  | 2.54  | 0.89 | -0.75 ns |
| Hmgcs1        | 3-hydroxy-3-methylglutaryl-Coenzyme A synthase 1                                          | 208715 | 7.39  | 8.89  | 10.22 | 0.72 | -0.88 *  |
| Cct4          | chaperonin subunit 4 (delta)                                                              | 12464  | 7.89  | 8.90  | 9.29  | 0.85 | -0.71 ns |
| Slc25a44      | solute carrier family 25, member 44                                                       | 229517 | 0.50  | 0.51  | 0.38  | 1.28 | 0.54 ns  |
| Sh2b3         | SH2B adaptor protein 3                                                                    | 16923  | 0.48  | 0.37  | 0.48  | 1.00 | -0.01 ns |
| Ttc7b         | tetratricopeptide repeat domain 7B                                                        | 104718 | 0.33  | 0.37  | 0.52  | 0.62 | -0.67 ns |
| 0610010K06Rik | RIKEN cDNA 0610010K06 gene                                                                | 71678  | 2.05  | 1.90  | 1.66  | 1.23 | 0.93 **  |
| Ipo13         | importin 13                                                                               | 230673 | 0.28  | 0.41  | 0.37  | 0.76 | -0.20 ns |
| Al467606      | expressed sequence Al467606                                                               | 101602 | 0.48  | 0.12  | 0.05  | 9.03 | 0.74 ns  |
| Slc7a6        | solute carrier family 7 (cationic amino acid transporter, y+ system), member 6            | 330836 | 0.73  | 0.90  | 0.65  | 1.11 | 0.50 ns  |
| Immt          | inner membrane protein, mitochondrial                                                     | 76614  | 1.53  | 1.73  | 2.34  | 0.65 | -0.77 ns |
| EG664868      |                                                                                           | 664868 | 30.46 | 27.77 | 22.74 | 1.33 | 0.96 **  |
| LOC625646     |                                                                                           | 625646 | 30.46 | 27.77 | 22.74 | 1.33 | 0.96 **  |
| LOC638514     |                                                                                           | 638514 | 30.46 | 27.77 | 22.74 | 1.33 | 0.96 **  |
| Rpl38         |                                                                                           | 67671  | 30.46 | 27.77 | 22.74 | 1.33 | 0.96 **  |
| C78339        | expressed sequence C78339                                                                 | 97863  | 3.98  | 3.52  | 4.23  | 0.94 | -0.02 ns |
| Par1          | presenilin associated, rhomboid-like                                                      | 381038 | 1.94  | 1.82  | 1.95  | 0.99 | -0.46 ns |
| 2900010J23Rik | RIKEN cDNA 2900010J23 gene                                                                | 72931  | 3.16  | 3.11  | 3.15  | 1.00 | 0.44 ns  |
| Gpr56         | G protein-coupled receptor 56                                                             | 14766  | 2.63  | 2.48  | 2.05  | 1.28 | 0.77 ns  |
| Gns           | glucosamine (N-acetyl)-6-sulfatase                                                        | 75612  | 2.39  | 2.41  | 2.30  | 1.03 | -0.49 ns |
| Fgfr2         | fibroblast growth factor receptor 2                                                       | 14183  | 1.28  | 1.03  | 0.49  | 2.61 | 0.57 ns  |
| Epb4.112      | erythrocyte protein band 4.1-like 2                                                       | 13822  | 2.16  | 1.81  | 1.46  | 1.47 | 0.82 *   |
| GlT25d1       | glycosyltransferase 25 domain containing 1                                                | 234407 | 1.00  | 1.49  | 1.12  | 0.90 | 0.34 ns  |
| Aqr           | aquarius                                                                                  | 11834  | 1.47  | 1.08  | 1.07  | 1.37 | 0.50 ns  |
| 2010005J08Rik | RIKEN cDNA 2010005J08 gene                                                                | 72046  | 0.63  | 0.82  | 0.69  | 0.91 | -0.13 ns |
| Pygb          | brain glycogen phosphorylase                                                              | 110078 | 2.28  | 2.11  | 1.97  | 1.15 | 0.38 ns  |
| Lrrc8d        | leucine rich repeat containing 8D                                                         | 231549 | 1.59  | 1.11  | 0.68  | 2.31 | 0.61 ns  |
| Hmgn2         | high mobility group nucleosomal binding domain 2                                          | 15331  | 10.96 | 10.67 | 11.69 | 0.93 | -0.14 ns |
| Klfl6         | Kruppel-like factor 6                                                                     | 23849  | 3.81  | 3.98  | 3.32  | 1.14 | 0.49 ns  |
| Ndufa12       | NADH dehydrogenase (ubiquinone) 1 alpha subcomplex, 12                                    | 66414  | 5.28  | 4.66  | 4.79  | 1.10 | -0.16 ns |
| Etnk1         | ethanolamine kinase 1                                                                     | 75320  | 1.73  | 1.53  | 1.65  | 1.05 | -0.30 ns |
| Myeov2        | myeloma overexpressed 2                                                                   | 66915  | 4.05  | 3.90  | 3.29  | 1.23 | 0.27 ns  |
| Lcmt2         | leucine carboxyl methyltransferase 2                                                      | 329504 | 0.42  | 0.37  | 0.38  | 1.10 | -0.21 ns |
| Nucks1        | nuclear casein kinase and cyclin-dependent kinase substrate 1                             | 98415  | 13.01 | 12.36 | 9.80  | 1.32 | 0.67 ns  |
| Scap          | SREBF chaperone                                                                           | 235623 | 1.16  | 1.11  | 1.17  | 0.99 | 0.50 ns  |
| Ankrd13c      | ankyrin repeat domain 13c                                                                 | 433667 | 2.62  | 2.45  | 1.61  | 1.62 | 0.51 ns  |

|               |                                                                                    |        |       |       |       |      |          |
|---------------|------------------------------------------------------------------------------------|--------|-------|-------|-------|------|----------|
| Pskh1         | protein serine kinase H1                                                           | 244631 | 0.38  | 0.34  | 0.38  | 0.98 | 0.09 ns  |
| AU042671      | expressed sequence AU042671                                                        | 269700 | 0.42  | 0.35  | 0.37  | 1.14 | 0.15 ns  |
| Ireb2         | iron responsive element binding protein 2                                          | 64602  | 1.41  | 1.07  | 1.17  | 1.20 | 0.75 ns  |
| Gtf2a2        | general transcription factor II A, 2                                               | 235459 | 1.53  | 1.35  | 1.57  | 0.97 | 0.33 ns  |
| Acsl4         | acyl-CoA synthetase long-chain family member 4                                     | 50790  | 0.70  | 1.05  | 2.65  | 0.27 | -0.75 ns |
| Cct2          | chaperonin subunit 2 (beta)                                                        | 12461  | 11.55 | 9.32  | 9.60  | 1.20 | 0.06 ns  |
| Commd3        | COMM domain containing 3                                                           | 12238  | 1.96  | 1.70  | 1.62  | 1.20 | -0.04 ns |
| Ubp2l         | ubiquitin associated protein 2-like                                                | 74383  | 2.19  | 2.16  | 2.11  | 1.03 | -0.38 ns |
| Inpp5f        | inositol polyphosphate-5-phosphatase F                                             | 101490 | 0.76  | 0.72  | 0.73  | 1.04 | 0.65 ns  |
| Anln          | anillin, actin binding protein (scraps homolog, Drosophila)                        | 68743  | 5.66  | 4.95  | 4.92  | 1.15 | 0.69 ns  |
| Nudcd1        | NudC domain containing 1                                                           | 67429  | 1.01  | 1.13  | 1.22  | 0.83 | -0.60 ns |
| Mare          | alpha globin regulatory element containing gene                                    | 17168  | 0.41  | 0.29  | 0.45  | 0.90 | -0.12 ns |
| Chfr          | checkpoint with forkhead and ring finger domains                                   | 231600 | 1.17  | 1.16  | 1.79  | 0.65 | -0.82 *  |
| Polr2b        | polymerase (RNA) II (DNA directed) polypeptide B                                   | 231329 | 4.01  | 3.48  | 3.48  | 1.15 | 0.80 ns  |
| AU022870      | expressed sequence AU022870                                                        | 231874 | 2.29  | 2.27  | 2.60  | 0.88 | -0.41 ns |
| Eaf1          | ELL associated factor 1                                                            | 74427  | 0.77  | 0.67  | 0.95  | 0.80 | -0.43 ns |
| Cbx7          | chromobox homolog 7                                                                | 52609  | 0.45  | 0.40  | 0.41  | 1.09 | 0.41 ns  |
| Dab2ip        | disabled homolog 2 (Drosophila) interacting protein                                | 69601  | 0.93  | 0.89  | 0.57  | 1.62 | 0.75 ns  |
| Slc45a4       | solute carrier family 45, member 4                                                 | 106068 | 1.88  | 1.42  | 1.43  | 1.30 | 0.43 ns  |
| Atp5f1        | ATP synthase, H+ transporting, mitochondrial F0 complex, subunit b, isoform 1      | 11950  | 10.74 | 11.75 | 9.00  | 1.19 | 0.34 ns  |
| Prpf38a       | PRP38 pre-mRNA processing factor 38 (yeast) domain containing A                    | 230596 | 1.13  | 1.28  | 1.25  | 0.90 | 0.16 ns  |
| Gmps          | guanine monphosphate synthetase                                                    | 229363 | 3.05  | 3.26  | 3.48  | 0.87 | -0.89 *  |
| Ran           |                                                                                    | 19384  | 11.43 | 11.92 | 12.19 | 0.93 | -0.62 ns |
| Cdc37l1       | cell division cycle 37 homolog (S. cerevisiae)-like 1                              | 67072  | 1.56  | 1.55  | 0.99  | 1.57 | 0.79 ns  |
| Tmem30b       | transmembrane protein 30B                                                          | 238257 | 1.19  | 2.59  | 1.90  | 0.62 | -0.64 ns |
| 1190002N15Rik | RIKEN cDNA 1190002N15 gene                                                         | 68861  | 0.22  | 0.32  | 0.22  | 1.01 | 0.34 ns  |
| Tnpo1         | transportin 1                                                                      | 238799 | 1.72  | 2.08  | 2.64  | 0.65 | -0.93 ** |
| Ppp3r1        | protein phosphatase 3, regulatory subunit B, alpha isoform (calcineurin B, type I) | 19058  | 1.68  | 1.59  | 1.81  | 0.92 | -0.42 ns |
| Commd2        | COMM domain containing 2                                                           | 52245  | 1.36  | 1.40  | 1.14  | 1.19 | 0.68 ns  |
| Baz1a         | bromodomain adjacent to zinc finger domain 1A                                      | 217578 | 2.04  | 2.18  | 3.47  | 0.59 | -0.75 ns |
| Ndufs6        | NADH dehydrogenase (ubiquinone) Fe-S protein 6                                     | 407785 | 1.83  | 2.78  | 3.19  | 0.57 | -0.79 ns |
| Inpp5a        | inositol polyphosphate-5-phosphatase A                                             | 212111 | 0.35  | 0.29  | 0.62  | 0.56 | -0.38 ns |
| Dcp1a         | decapping enzyme                                                                   | 75901  | 0.58  | 0.63  | 0.57  | 1.01 | 0.26 ns  |
| AA986860      | expressed sequence AA986860                                                        | 212439 | 0.34  | 0.28  | 0.21  | 1.61 | -0.17 ns |
| Ap2s1         | adaptor-related protein complex 2, sigma 1 subunit                                 | 232910 | 1.94  | 1.99  | 2.35  | 0.82 | -0.20 ns |
| Pank3         | pantothenate kinase 3                                                              | 211347 | 2.44  | 2.42  | 3.61  | 0.67 | -0.74 ns |
| Snx27         | sorting nexin family member 27                                                     | 76742  | 0.70  | 0.72  | 0.56  | 1.23 | 0.75 ns  |
| B4galt5       | UDP-Gal:betaGlcNAc beta 1,4-galactosyltransferase, polypeptide 5                   | 56336  | 0.45  | 0.40  | 0.59  | 0.76 | -0.68 ns |
| C330006A16Rik | RIKEN cDNA C330006A16 gene                                                         | 109299 | 0.52  | 0.57  | 0.44  | 1.18 | 0.26 ns  |
| Wdr41         | WD repeat domain 41                                                                | 218460 | 0.17  | 0.31  | 0.37  | 0.45 | -0.86 *  |
| Gemin4        | gem (nuclear organelle) associated protein 4                                       | 276919 | 0.30  | 0.39  | 0.31  | 0.97 | -0.30 ns |
| Zfp367        | zinc finger protein 367                                                            | 238673 | 0.96  | 1.71  | 2.28  | 0.42 | -0.66 ns |
| 5830434P21Rik | RIKEN cDNA 5830434P21 gene                                                         | 227723 | 1.96  | 1.79  | 1.42  | 1.37 | 0.80 ns  |
| Sec23ip       | Sec23 interacting protein                                                          | 207352 | 0.72  | 0.76  | 0.89  | 0.80 | -0.63 ns |
| lrf2bp2       |                                                                                    | 270110 | 1.18  | 1.06  | 0.50  | 2.36 | 0.12 ns  |
| Wdr18         | WD repeat domain 18                                                                | 216156 | 0.56  | 0.53  | 0.41  | 1.36 | 0.57 ns  |
| Smad5         | MAD homolog 5 (Drosophila)                                                         | 17129  | 0.81  | 0.84  | 0.97  | 0.83 | -0.28 ns |
| Pomt2         | protein-O-mannosyltransferase 2                                                    | 217734 | 0.22  | 0.30  | 0.37  | 0.59 | -0.89 *  |
| Slc44a1       | solute carrier family 44, member 1                                                 | 100434 | 4.19  | 4.67  | 4.20  | 0.99 | 0.28 ns  |
| Mrps27        | mitochondrial ribosomal protein S27                                                | 218506 | 0.32  | 0.50  | 0.55  | 0.58 | -0.53 ns |
| Rhobtb3       | Rho-related BTB domain containing 3                                                | 73296  | 1.18  | 1.42  | 1.57  | 0.75 | -0.58 ns |
| Spag9         | sperm associated antigen 9                                                         | 70834  | 3.66  | 2.82  | 3.73  | 0.98 | 0.06 ns  |
| Aof1          | amine oxidase, flavin containing 1                                                 | 218214 | 0.56  | 0.51  | 0.57  | 0.99 | -0.32 ns |
| Wtip          | WT1-interacting protein                                                            | 101543 | 0.37  | 0.46  | 0.81  | 0.45 | -0.74 ns |
| Mgea5         | meningioma expressed antigen 5 (hyaluronidase)                                     | 76055  | 4.50  | 4.25  | 4.32  | 1.04 | 0.36 ns  |
| Rnf141        | ring finger protein 141                                                            | 67150  | 0.45  | 0.54  | 0.66  | 0.69 | -0.25 ns |
| Gnl3          | guanine nucleotide binding protein-like 3 (nucleolar)                              | 30877  | 1.81  | 2.03  | 1.61  | 1.12 | 0.05 ns  |
| Pcbp4         | poly(rC) binding protein 4                                                         | 59092  | 1.05  | 0.95  | 0.80  | 1.30 | 0.89 *   |
| AU014645      | expressed sequence AU014645                                                        | 433702 | 0.86  | 0.83  | 1.03  | 0.83 | -0.61 ns |
| Ube2q2        | ubiquitin-conjugating enzyme E2Q (putative) 2                                      | 109161 | 1.40  | 1.32  | 1.20  | 1.16 | 0.79 ns  |
| Vps41         | vacuolar protein sorting 41 (yeast)                                                | 218035 | 1.14  | 1.32  | 1.17  | 0.97 | 0.14 ns  |
| Pnrc1         | proline-rich nuclear receptor coactivator 1                                        | 108767 | 2.22  | 2.18  | 2.87  | 0.77 | -0.74 ns |
| Emp2          | epithelial membrane protein 2                                                      | 13731  | 6.60  | 6.43  | 11.04 | 0.59 | -0.61 ns |
| Wnk1          | WNK lysine deficient protein kinase 1                                              | 232341 | 6.70  | 6.21  | 5.32  | 1.25 | 0.92 **  |
| Sfrs8         | splicing factor, arginine/serine-rich 8                                            | 231769 | 0.78  | 0.81  | 0.86  | 0.90 | -0.33 ns |
| Fubp3         | far upstream element (FUSE) binding protein 3                                      | 320267 | 1.15  | 1.62  | 1.48  | 0.77 | -0.67 ns |
| Arhgef17      | Rho guanine nucleotide exchange factor (GEF) 17                                    | 207212 | 0.65  | 0.63  | 0.58  | 1.11 | -0.10 ns |
| Rbm35b        | RNA binding motif protein 35b                                                      | 77411  | 1.71  | 1.55  | 1.72  | 0.99 | -0.43 ns |
| Chmp6         | chromatin modifying protein 6                                                      | 208092 | 1.40  | 1.44  | 1.49  | 0.93 | 0.15 ns  |
| 6430706D22Rik |                                                                                    | 381280 | 4.15  | 3.98  | 3.80  | 1.09 | 0.62 ns  |
| Cabin1        | calcineurin binding protein 1                                                      | 104248 | 0.43  | 0.48  | 0.37  | 1.16 | 0.63 ns  |
| Rps9          | ribosomal protein S9                                                               | 76846  | 15.77 | 14.08 | 12.51 | 1.25 | 0.56 ns  |
| 2210016L21Rik | RIKEN cDNA 2210016L21 gene                                                         | 72357  | 0.41  | 0.43  | 0.45  | 0.89 | 0.03 ns  |
| Nat10         | N-acetyltransferase 10                                                             | 98956  | 0.44  | 0.35  | 0.28  | 1.55 | 0.56 ns  |
| Hn1l          | hematological and neurological expressed 1-like                                    | 52009  | 4.23  | 3.19  | 2.22  | 1.90 | 0.88 *   |
| 4933433P14Rik | RIKEN cDNA 4933433P14 gene                                                         | 66787  | 0.91  | 0.79  | 0.99  | 0.91 | 0.02 ns  |
| Bahd1         | bromo adjacent homology domain containing 1                                        | 228536 | 0.69  | 0.58  | 0.77  | 0.88 | -0.23 ns |
| Ptplad1       | protein tyrosine phosphatase-like A domain containing 1                            | 57874  | 2.19  | 1.98  | 1.51  | 1.44 | 0.94 **  |
| Srp68         | signal recognition particle 68                                                     | 217337 | 2.36  | 2.08  | 3.13  | 0.75 | -0.28 ns |
| Cant1         | calcium activated nucleotidase 1                                                   | 76025  | 0.74  | 0.75  | 0.74  | 0.99 | 0.14 ns  |
| Edc3          | enhancer of mRNA decapping 3 homolog (S. cerevisiae)                               | 353190 | 0.51  | 0.50  | 0.49  | 1.04 | 0.61 ns  |
| Sesn1         | sestrin 1                                                                          | 140742 | 0.54  | 0.50  | 0.37  | 1.46 | 0.30 ns  |
| AW555464      | expressed sequence AW555464                                                        | 217882 | 3.23  | 3.27  | 3.92  | 0.82 | -0.62 ns |
| Gcn11l        | GCN1 general control of amino-acid synthesis 1-like 1 (yeast)                      | 231659 | 1.29  | 1.23  | 1.26  | 1.01 | 0.18 ns  |
| D19Wsu162e    | DNA segment, Chr 19, Wayne State University 162, expressed                         | 226178 | 1.20  | 1.31  | 0.80  | 1.49 | 0.72 ns  |

|               |                                                                   |        |       |       |       |      |          |
|---------------|-------------------------------------------------------------------|--------|-------|-------|-------|------|----------|
| Cbx1          | chromobox homolog 1 (Drosophila HP1 beta)                         | 12412  | 2.23  | 2.42  | 3.18  | 0.70 | -0.81 ns |
| Rps21         | ribosomal protein S21                                             | 66481  | 16.70 | 16.03 | 14.01 | 1.19 | 0.14 ns  |
| Akap13        | A kinase (PRKA) anchor protein 13                                 | 75547  | 0.62  | 0.57  | 0.93  | 0.66 | -0.75 ns |
| Acvr1b        | activin A receptor, type 1B                                       | 11479  | 1.57  | 1.34  | 1.79  | 0.87 | -0.16 ns |
| 2310035C23Rik | RIKEN cDNA 2310035C23 gene                                        | 227446 | 1.50  | 1.35  | 1.00  | 1.50 | 0.47 ns  |
| Elmod2        | ELMO domain containing 2                                          | 244548 | 0.87  | 1.11  | 1.11  | 0.78 | -0.39 ns |
| Cry1          | cryptochrome 1 (photolyase-like)                                  | 12952  | 0.35  | 0.60  | 0.53  | 0.66 | -0.56 ns |
| Hcfc1         | host cell factor C1                                               | 15161  | 2.24  | 2.11  | 2.36  | 0.94 | -0.17 ns |
| LOC677213     | similar to U2AF homology motif (UHM) kinase 1                     | 677213 | 1.31  | 1.17  | 1.18  | 1.10 | -0.19 ns |
| Papd5         | PAP associated domain containing 5                                | 214627 | 1.07  | 1.07  | 1.49  | 0.71 | -0.22 ns |
| Tmem87b       | transmembrane protein 87B                                         | 72477  | 0.50  | 0.59  | 0.58  | 0.86 | -0.55 ns |
| Trio          | triple functional domain (PTPRF interacting)                      | 223435 | 2.13  | 2.07  | 2.10  | 1.01 | -0.53 ns |
| Wdr3          | WD repeat domain 3                                                | 269470 | 1.52  | 1.98  | 1.42  | 1.07 | 0.24 ns  |
| Lnpep         | leucyl/cystinyl aminopeptidase                                    | 240028 | 3.67  | 2.88  | 1.98  | 1.84 | 0.79 ns  |
| Zdhhc18       | zinc finger, DHHC domain containing 18                            | 503610 | 0.46  | 0.47  | 0.52  | 0.88 | -0.78 ns |
| Gna13         | guanine nucleotide binding protein, alpha 13                      | 14674  | 2.47  | 2.50  | 2.33  | 1.06 | 0.75 ns  |
| Slc31a1       | solute carrier family 31, member 1                                | 20529  | 0.51  | 0.45  | 0.73  | 0.69 | -0.80 ns |
| Slc39a10      | solute carrier family 39 (zinc transporter), member 10            | 227059 | 1.28  | 1.38  | 1.26  | 1.02 | -0.38 ns |
| D030016E14Rik | RIKEN cDNA D030016E14 gene                                        | 320714 | 1.04  | 1.06  | 1.19  | 0.87 | -0.39 ns |
| Mbnl2         | muscleblind-like 2                                                | 105559 | 2.62  | 2.46  | 2.69  | 0.97 | -0.55 ns |
| Mier1         | mesoderm induction early response 1 homolog (Xenopus laevis)      | 71148  | 0.84  | 0.81  | 0.96  | 0.87 | -0.57 ns |
| S100pbp       | S100P binding protein                                             | 74648  | 0.62  | 0.69  | 0.71  | 0.87 | -0.52 ns |
| Dpy19l1       | dpy-19-like 1 (C. elegans)                                        | 244745 | 0.32  | 0.42  | 0.25  | 1.28 | 0.63 ns  |
| Rhbdd3        | rhomboid domain containing 3                                      | 279766 | 0.35  | 0.37  | 0.32  | 1.10 | 0.07 ns  |
| Pde4dip       | phosphodiesterase 4D interacting protein (myomegalin)             | 83679  | 0.62  | 0.75  | 0.71  | 0.87 | -0.63 ns |
| 1110018G07Rik | RIKEN cDNA 1110018G07 gene                                        | 68497  | 0.96  | 0.87  | 0.96  | 0.99 | 0.24 ns  |
| Palld         | palladin, cytoskeletal associated protein                         | 72333  | 0.59  | 0.41  | 0.34  | 1.75 | -0.02 ns |
| Als2cl        | ALS2 C-terminal like                                              | 235633 | 1.01  | 0.94  | 1.08  | 0.93 | 0.13 ns  |
| Dpysl2        | dihydropyrimidinase-like 2                                        | 12934  | 7.68  | 6.85  | 6.79  | 1.12 | 0.75 ns  |
| Rrm2b         | ribonucleotide reductase M2 B (TP53 inducible)                    | 382985 | 0.58  | 0.53  | 0.68  | 0.85 | -0.61 ns |
| C77080        | expressed sequence C77080                                         | 97130  | 1.19  | 1.28  | 1.05  | 1.13 | 0.73 ns  |
| Lhfp          | lipoma HMGIC fusion partner                                       | 108927 | 1.72  | 1.52  | 1.59  | 1.08 | -0.28 ns |
| L3mbtl2       | l(3)mbt-like 2 (Drosophila)                                       | 214669 | 0.38  | 0.50  | 0.57  | 0.67 | -0.54 ns |
| Tnks          | tankyrase, TRF1-interacting ankyrin-related ADP-ribose polymerase | 21951  | 1.62  | 1.92  | 2.87  | 0.56 | -0.67 ns |
| Casc4         | cancer susceptibility candidate 4                                 | 319996 | 1.48  | 1.27  | 0.93  | 1.59 | 0.49 ns  |
| Cldn12        | claudin 12                                                        | 64945  | 2.68  | 3.13  | 3.40  | 0.78 | -0.60 ns |
| 9030612M13Rik | RIKEN cDNA 9030612M13 gene                                        | 208292 | 2.98  | 2.57  | 1.85  | 1.60 | 0.76 ns  |
| Serf2         | small EDRK-rich factor 2                                          | 378702 | 6.84  | 5.22  | 4.35  | 1.56 | 0.89 *   |
| Setx          | senataxin                                                         | 269254 | 2.95  | 2.90  | 2.61  | 1.12 | 0.66 ns  |
| Tgfb3         | transforming growth factor, beta receptor III                     | 21814  | 1.65  | 1.32  | 0.52  | 3.14 | -0.13 ns |
| E130309D02Rik | RIKEN cDNA E130309D02 gene                                        | 231868 | 0.79  | 0.71  | 0.60  | 1.31 | 0.61 ns  |
| Rdh13         | retinol dehydrogenase 13 (all-trans and 9-cis)                    | 108841 | 0.34  | 0.30  | 0.24  | 1.42 | 0.25 ns  |
| Jak1          | Janus kinase 1                                                    | 16451  | 2.00  | 1.77  | 1.94  | 1.03 | -0.11 ns |
| 6720463M24Rik | RIKEN cDNA 6720463M24 gene                                        | 77744  | 0.47  | 0.45  | 0.58  | 0.81 | -0.42 ns |
| Mlit6         |                                                                   | 246198 | 1.69  | 1.48  | 1.65  | 1.02 | 0.22 ns  |
| Tmem48        | transmembrane protein 48                                          | 72787  | 0.45  | 0.44  | 0.55  | 0.83 | -0.29 ns |
| Mcart1        | mitochondrial carrier triple repeat 1                             | 230125 | 1.30  | 1.25  | 1.44  | 0.90 | -0.64 ns |
| 1110012D08Rik | RIKEN cDNA 1110012D08 gene                                        | 73827  | 0.37  | 0.31  | 0.26  | 1.42 | 0.67 ns  |
| Anapc5        | anaphase-promoting complex subunit 5                              | 59008  | 8.82  | 7.54  | 8.23  | 1.07 | 0.52 ns  |
| 4833418A01Rik | RIKEN cDNA 4833418A01 gene                                        | 75763  | 0.54  | 0.44  | 0.35  | 1.54 | 0.46 ns  |
| Unc84b        | unc-84 homolog B (C. elegans)                                     | 223697 | 2.19  | 2.13  | 2.10  | 1.04 | 0.61 ns  |
| Fndc3b        | fibronectin type III domain containing 3B                         | 72007  | 4.64  | 3.81  | 2.58  | 1.79 | 0.88 *   |
| March6        | membrane-associated ring finger (C3HC4) 6                         | 223455 | 3.19  | 2.97  | 3.19  | 0.99 | 0.12 ns  |
| 8430408G22Rik | RIKEN cDNA 8430408G22 gene                                        | 213393 | 0.36  | 0.29  | 1.05  | 0.34 | -0.62 ns |
| Dars2         | aspartyl-tRNA synthetase 2 (mitochondrial)                        | 226539 | 0.36  | 0.38  | 0.46  | 0.79 | -0.71 ns |
| C330006K01Rik | RIKEN cDNA C330006K01 gene                                        | 231855 | 0.38  | 0.35  | 0.33  | 1.15 | 0.29 ns  |
| Lrrfp1        | leucine rich repeat (in FLLI) interacting protein 1               | 16978  | 3.55  | 4.06  | 2.46  | 1.44 | 0.18 ns  |
| Hs1bp3        | HCLS1 binding protein 3                                           | 58240  | 0.41  | 0.45  | 0.54  | 0.75 | -0.81 ns |
| LOC627908     |                                                                   | 627908 | 5.13  | 5.53  | 5.65  | 0.90 | -0.62 ns |
| Ppp4r2        |                                                                   | 232314 | 5.13  | 5.53  | 5.65  | 0.90 | -0.62 ns |
| C330002119Rik | RIKEN cDNA C330002119 gene                                        | 77480  | 4.45  | 4.18  | 3.57  | 1.24 | 0.19 ns  |
| Hisppd1       | histidine acid phosphatase domain containing 1                    | 227399 | 0.98  | 0.96  | 0.61  | 1.60 | 0.21 ns  |
| Fat1          |                                                                   | 14107  | 5.68  | 4.73  | 3.20  | 1.76 | 0.80 ns  |
| 6030458C11Rik | RIKEN cDNA 6030458C11 gene                                        | 77877  | 0.98  | 0.93  | 1.09  | 0.89 | -0.64 ns |
| Cc2d1b        | coiled-coil and C2 domain containing 1B                           | 319965 | 0.44  | 0.56  | 0.66  | 0.67 | -0.83 *  |
| Esp1l         | extra spindle poles-like 1 (S. cerevisiae)                        | 105988 | 1.04  | 0.99  | 1.07  | 0.97 | 0.46 ns  |
| 1810030O07Rik | RIKEN cDNA 1810030O07 gene                                        | 69155  | 0.27  | 0.39  | 0.48  | 0.57 | -0.18 ns |
| Btbd3         | BTB (POZ) domain containing 3                                     | 228662 | 0.76  | 0.73  | 0.80  | 0.95 | -0.01 ns |
| Zxdc          | ZXD family zinc finger C                                          | 80292  | 0.68  | 0.94  | 0.85  | 0.79 | -0.74 ns |
| Atad4         | ATPase family, AAA domain containing 4                            | 217138 | 0.85  | 0.71  | 0.68  | 1.24 | -0.16 ns |
| R3hdm1        | R3H domain 1 (binds single-stranded nucleic acids)                | 226412 | 2.31  | 1.95  | 1.94  | 1.19 | 0.45 ns  |
| 2410042D21Rik | RIKEN cDNA 2410042D21 gene                                        | 72425  | 0.70  | 0.46  | 0.52  | 1.33 | 0.61 ns  |
| Pcnt          | pericentrin (kendrin)                                             | 18541  | 0.69  | 0.72  | 0.72  | 0.96 | -0.58 ns |
| 4732418C07Rik | RIKEN cDNA 4732418C07 gene                                        | 230648 | 0.86  | 0.81  | 0.98  | 0.87 | 0.04 ns  |
| Mrps26        | mitochondrial ribosomal protein S26                               | 99045  | 1.06  | 1.17  | 1.29  | 0.81 | -0.55 ns |
| Dnajc11       | DnaJ (Hsp40) homolog, subfamily C, member 11                      | 230935 | 0.31  | 0.32  | 0.35  | 0.87 | -0.03 ns |
| Cnot10        | CCR4-NOT transcription complex, subunit 10                        | 78893  | 0.64  | 0.65  | 0.61  | 1.05 | 0.58 ns  |
| Tpm4          | tropomyosin 4                                                     | 326618 | 6.53  | 6.98  | 8.42  | 0.77 | -0.08 ns |
| Eif2b5        | eukaryotic translation initiation factor 2B, subunit 5 epsilon    | 224045 | 1.65  | 1.59  | 1.94  | 0.84 | -0.29 ns |
| Bat3          | HLA-B-associated transcript 3                                     | 224727 | 1.81  | 1.49  | 1.31  | 1.37 | 0.63 ns  |
| Lgr4          | leucine-rich repeat-containing G protein-coupled receptor 4       | 107515 | 4.92  | 3.05  | 2.51  | 1.95 | 0.31 ns  |
| Spag5         | sperm associated antigen 5                                        | 54141  | 0.83  | 0.90  | 0.68  | 1.20 | 0.76 ns  |
| Tmem127       | transmembrane protein 127                                         | 69470  | 0.87  | 0.86  | 0.69  | 1.26 | 0.26 ns  |
| AI597468      | expressed sequence AI597468                                       | 103266 | 1.79  | 1.70  | 1.65  | 1.08 | 0.65 ns  |
| 0610007L01Rik | RIKEN cDNA 0610007L01 gene                                        | 71667  | 1.66  | 1.46  | 1.70  | 0.97 | -0.49 ns |
| AU021838      | expressed sequence AU021838                                       | 328099 | 2.35  | 2.49  | 2.63  | 0.89 | -0.86 *  |
| Cttn          | cortactin                                                         | 13043  | 6.70  | 6.87  | 6.34  | 1.05 | 0.20 ns  |

|               |                                                                                                     |        |      |      |      |      |          |
|---------------|-----------------------------------------------------------------------------------------------------|--------|------|------|------|------|----------|
| Zcchc6        | zinc finger, CCHC domain containing 6                                                               | 214290 | 1.44 | 1.40 | 1.48 | 0.97 | 0.25 ns  |
| Smg6          | Smg-6 homolog, nonsense mediated mRNA decay factor (C. elegans)                                     | 103677 | 0.45 | 0.28 | 0.26 | 1.73 | 0.85 *   |
| Atg4d         | autophagy-related 4D (yeast)                                                                        | 235040 | 0.64 | 0.56 | 0.62 | 1.03 | 0.48 ns  |
| Asb4          | ankyrin repeat and SOCS box-containing protein 4                                                    | 65255  | 0.29 | 0.27 | 0.05 | 5.89 | 0.51 ns  |
| Dph3          | DPH3 homolog (KT111, S. cerevisiae)                                                                 | 105638 | 0.59 | 0.59 | 0.70 | 0.83 | -0.46 ns |
| Rab35         | RAB35, member RAS oncogene family                                                                   | 77407  | 1.03 | 0.99 | 0.98 | 1.05 | 0.31 ns  |
| Dync11i2      | dynein, cytoplasmic 1 light intermediate chain 2                                                    | 234663 | 1.41 | 1.40 | 1.40 | 1.00 | 0.43 ns  |
| Usp1          | ubiquitin specific peptidase like 1                                                                 | 231915 | 0.96 | 1.01 | 1.04 | 0.92 | -0.08 ns |
| C030046I01Rik | RIKEN cDNA C030046I01 gene                                                                          | 109284 | 1.92 | 1.77 | 2.06 | 0.93 | -0.41 ns |
| Sec24a        | SEC24 related gene family, member A (S. cerevisiae)                                                 | 77371  | 0.71 | 0.81 | 1.04 | 0.68 | -0.75 ns |
| 0610010E21Rik | RIKEN cDNA 0610010E21 gene                                                                          | 68332  | 0.36 | 0.48 | 0.74 | 0.48 | -0.63 ns |
| Trp53bp2      | transformation related protein 53 binding protein 2                                                 | 209456 | 0.78 | 0.78 | 0.54 | 1.44 | 0.13 ns  |
| Spag7         | sperm associated antigen 7                                                                          | 216873 | 1.23 | 1.25 | 1.71 | 0.72 | -0.89 *  |
| Myo6          | myosin VI                                                                                           | 17920  | 1.83 | 1.73 | 1.34 | 1.36 | 0.54 ns  |
| Arl5a         | ADP-ribosylation factor-like 5A                                                                     | 75423  | 3.83 | 2.51 | 2.05 | 1.86 | 0.80 ns  |
| Zfp277        | zinc finger protein 277                                                                             | 246196 | 1.43 | 1.37 | 1.71 | 0.83 | -0.56 ns |
| C030048B08Rik | RIKEN cDNA C030048B08 gene                                                                          | 269623 | 0.50 | 0.50 | 0.56 | 0.88 | -0.81 *  |
| Cntrob        | centrobin, centrosomal BRCA2 interacting protein                                                    | 216846 | 0.35 | 0.39 | 0.44 | 0.80 | -0.11 ns |
| Isg20l2       | interferon stimulated exonuclease gene 20-like 2                                                    | 229504 | 1.90 | 2.06 | 1.69 | 1.12 | 0.04 ns  |
| 6720458F09Rik | RIKEN cDNA 6720458F09 gene                                                                          | 328162 | 0.25 | 0.38 | 0.26 | 0.97 | 0.19 ns  |
| Bola3         | bolA-like 3 (E. coli)                                                                               | 78653  | 0.85 | 0.96 | 0.92 | 0.92 | -0.27 ns |
| Cdk10         | cyclin-dependent kinase (CDC2-like) 10                                                              | 234854 | 0.53 | 0.60 | 0.46 | 1.16 | 0.30 ns  |
| Rbms2         | RNA binding motif, single stranded interacting protein 2                                            | 56516  | 1.33 | 1.17 | 0.86 | 1.54 | 0.60 ns  |
| Cnksr3        | Cnksr family member 3                                                                               | 215748 | 1.55 | 1.60 | 1.08 | 1.43 | 0.48 ns  |
| Mdh2          | malate dehydrogenase 2, NAD (mitochondrial)                                                         | 17448  | 9.50 | 8.13 | 8.70 | 1.09 | -0.01 ns |
| BC024659      | cDNA sequence BC024659                                                                              | 108934 | 0.45 | 0.48 | 0.46 | 0.96 | 0.43 ns  |
| Shroom2       |                                                                                                     | 110380 | 0.97 | 0.90 | 1.16 | 0.83 | 0.14 ns  |
| 4931406P16Rik | RIKEN cDNA 4931406P16 gene                                                                          | 233103 | 0.67 | 0.70 | 0.81 | 0.83 | -0.24 ns |
| 4933427D14Rik | RIKEN cDNA 4933427D14 gene                                                                          | 74477  | 0.51 | 0.50 | 0.50 | 1.01 | 0.13 ns  |
| Slk           | STE20-like kinase (yeast)                                                                           | 20874  | 2.51 | 2.81 | 2.09 | 1.19 | 0.64 ns  |
| Ttc9c         | tetratricopeptide repeat domain 9C                                                                  | 70387  | 1.47 | 1.66 | 1.25 | 1.18 | 0.59 ns  |
| Dhps          | deoxyhypusine synthase                                                                              | 330817 | 0.67 | 0.71 | 0.65 | 1.02 | 0.24 ns  |
| Rbms1         | RNA binding motif, single stranded interacting protein 1                                            | 56878  | 5.90 | 5.32 | 4.26 | 1.38 | 0.91 *   |
| BC051227      | cDNA sequence BC051227                                                                              | 234384 | 0.87 | 0.84 | 1.01 | 0.86 | -0.35 ns |
| Gylt1b        | glycosyltransferase-like 1B                                                                         | 228366 | 0.94 | 0.63 | 0.55 | 1.69 | 0.18 ns  |
| Grif1         | glucocorticoid receptor DNA binding factor 1                                                        | 232906 | 0.79 | 0.73 | 0.71 | 1.10 | 0.35 ns  |
| Als2cr13      | amyotrophic lateral sclerosis 2 (juvenile) chromosome region, candidate 13 (human)                  | 72750  | 0.58 | 0.61 | 0.61 | 0.95 | -0.28 ns |
| Ints5         | integrator complex subunit 5                                                                        | 109077 | 7.00 | 8.01 | 6.18 | 1.13 | 0.54 ns  |
| Znrf2         | zinc and ring finger 2                                                                              | 387524 | 0.38 | 0.40 | 0.47 | 0.79 | -0.13 ns |
| BC043098      | cDNA sequence BC043098                                                                              | 214469 | 1.79 | 1.59 | 1.34 | 1.33 | 0.66 ns  |
| Pdap1         | PDGFA associated protein 1                                                                          | 231887 | 2.38 | 2.59 | 2.66 | 0.89 | -0.19 ns |
| C230096C10Rik | RIKEN cDNA C230096C10 gene                                                                          | 230866 | 0.88 | 0.90 | 0.86 | 1.01 | -0.20 ns |
| Zbtb33        | zinc finger and BTB domain containing 33                                                            | 56805  | 0.92 | 0.96 | 1.41 | 0.65 | -0.70 ns |
| Atp8b2        | ATPase, class I, type 8B, member 2                                                                  | 54667  | 0.86 | 0.88 | 0.51 | 1.67 | 0.86 *   |
| Gtppb10       | GTP-binding protein 10 (putative)                                                                   | 207704 | 0.50 | 0.52 | 0.68 | 0.73 | -0.82 *  |
| Zfp692        | zinc finger protein 692                                                                             | 103836 | 0.48 | 0.39 | 0.50 | 0.94 | -0.54 ns |
| Mtss1         | metastasis suppressor 1                                                                             | 211401 | 0.71 | 1.37 | 2.00 | 0.35 | -0.96 ** |
| Dnajc13       | DnaJ (Hsp40) homolog, subfamily C, member 13                                                        | 235567 | 0.90 | 0.98 | 0.89 | 1.00 | 0.47 ns  |
| Mtmr3         | myotubularin related protein 3                                                                      | 74302  | 1.70 | 1.46 | 1.48 | 1.14 | 0.22 ns  |
| Repin1        | replication initiator 1                                                                             | 58887  | 0.70 | 0.85 | 0.85 | 0.82 | -0.15 ns |
| Cdkn1b        | cyclin-dependent kinase inhibitor 1B                                                                | 12576  | 3.35 | 3.58 | 3.72 | 0.89 | -0.62 ns |
| Ndufb6        | NADH dehydrogenase (ubiquinone) 1 beta subcomplex, 6                                                | 230075 | 1.82 | 2.14 | 2.79 | 0.65 | -0.67 ns |
| Mtmr12        | myotubularin related protein 12                                                                     | 268783 | 0.79 | 0.67 | 0.86 | 0.92 | 0.00 ns  |
| Herc1         | hect (homologous to the E6-AP (UBE3A) carboxyl terminus) domain and RCC1 (CHC1)-like domain (RLD) 1 | 235439 | 0.73 | 0.59 | 0.64 | 1.14 | 0.50 ns  |
| Rp2h          | retinitis pigmentosa 2 homolog (human)                                                              | 19889  | 0.58 | 0.54 | 1.08 | 0.53 | -0.71 ns |
| Rabgap11      | RAB GTPase activating protein 11-like                                                               | 29809  | 0.44 | 0.46 | 0.35 | 1.24 | 0.54 ns  |
| Zfp664        | zinc finger protein 664                                                                             | 269704 | 1.67 | 1.65 | 1.71 | 0.97 | -0.58 ns |
| Cwf19l1       | CWF19-like 1, cell cycle control (S. pombe)                                                         | 72502  | 0.44 | 0.50 | 0.29 | 1.52 | 0.64 ns  |
| Gtf3c1        | general transcription factor III C 1                                                                | 233863 | 0.61 | 0.65 | 0.75 | 0.82 | -0.80 ns |
| Jag1          | jagged 1                                                                                            | 16449  | 1.00 | 1.38 | 1.04 | 0.96 | -0.25 ns |
| Pelo          | pelota homolog (Drosophila)                                                                         | 105083 | 0.21 | 0.26 | 0.41 | 0.51 | -0.82 *  |
| BC030336      | cDNA sequence BC030336                                                                              | 233812 | 0.87 | 0.80 | 0.82 | 1.04 | 0.35 ns  |
| Wdr37         | WD repeat domain 37                                                                                 | 207615 | 0.44 | 0.37 | 0.55 | 0.79 | -0.10 ns |
| Ubf1          | ubiquitin family domain containing 1                                                                | 28018  | 0.66 | 0.58 | 0.65 | 1.02 | -0.16 ns |
| Aebp2         | AE binding protein 2                                                                                | 11569  | 1.98 | 1.97 | 2.36 | 0.84 | -0.39 ns |
| Ap1g1         | adaptor protein complex AP-1, gamma 1 subunit                                                       | 11765  | 0.94 | 0.89 | 0.83 | 1.14 | 0.39 ns  |
| Pctk2         | PCTAIRE-motif protein kinase 2                                                                      | 237459 | 1.20 | 0.89 | 0.79 | 1.51 | 0.44 ns  |
| 5730601F06Rik | RIKEN cDNA 5730601F06 gene                                                                          | 77519  | 2.04 | 1.52 | 1.32 | 1.54 | 0.93 **  |
| Zfp523        | zinc finger protein 523                                                                             | 224656 | 0.61 | 0.53 | 0.47 | 1.29 | 0.82 *   |
| Gpr107        | G protein-coupled receptor 107                                                                      | 277463 | 0.36 | 0.38 | 0.39 | 0.92 | -0.15 ns |
| Zkscan17      | zinc finger with KRAB and SCAN domains 17                                                           | 268417 | 1.30 | 1.26 | 1.17 | 1.10 | 0.48 ns  |
| Synpo         | synaptopodin                                                                                        | 104027 | 0.47 | 0.43 | 0.44 | 1.06 | 0.52 ns  |
| Atg9b         | ATG9 autophagy related 9 homolog B (S. cerevisiae)                                                  | 213948 | 0.73 | 0.62 | 1.27 | 0.57 | -0.79 ns |
| Slc4a4        | solute carrier family 4 (anion exchanger), member 4                                                 | 54403  | 0.39 | 0.57 | 0.84 | 0.46 | -0.68 ns |
| D10627        | cDNA sequence D10627                                                                                | 234358 | 0.33 | 0.54 | 0.40 | 0.82 | -0.08 ns |
| Slc35e1       | solute carrier family 35, member E1                                                                 | 270066 | 0.65 | 0.73 | 0.64 | 1.00 | 0.47 ns  |
| Epm2aip1      | EPM2A (laforin) interacting protein 1                                                               | 77781  | 0.84 | 0.78 | 0.77 | 1.09 | 0.73 ns  |
| Spata2        | spermatogenesis associated 2                                                                        | 263876 | 0.77 | 0.65 | 0.70 | 1.10 | -0.22 ns |
| Fbxo11        | F-box protein 11                                                                                    | 225055 | 1.03 | 0.99 | 0.88 | 1.16 | 0.46 ns  |
| Sh3bgrl2      | SH3 domain binding glutamic acid-rich protein like 2                                                | 212531 | 1.18 | 1.04 | 0.87 | 1.36 | 0.67 ns  |
| Lphn2         | latrophilin 2                                                                                       | 99633  | 2.92 | 3.09 | 3.83 | 0.76 | -0.79 ns |
| Rexo4         | REX4, RNA exonuclease 4 homolog (S. cerevisiae)                                                     | 227656 | 0.66 | 0.98 | 0.69 | 0.96 | -0.38 ns |
| Cdh13         | cadherin 13                                                                                         | 12554  | 0.38 | 0.47 | 0.30 | 1.25 | 0.61 ns  |
| Cbx2          | chromobox homolog 2 (Drosophila Pc class)                                                           | 12416  | 0.49 | 0.41 | 0.58 | 0.83 | -0.10 ns |
| Tceb3         | transcription elongation factor B (SIII), polypeptide 3                                             | 27224  | 0.35 | 0.32 | 0.41 | 0.85 | -0.15 ns |

|               |                                                                                      |        |       |       |       |      |          |
|---------------|--------------------------------------------------------------------------------------|--------|-------|-------|-------|------|----------|
| Metap2        | methionine aminopeptidase 2                                                          | 56307  | 6.31  | 5.99  | 5.29  | 1.19 | 0.77 ns  |
| Fut11         | fucosyltransferase 11                                                                | 73068  | 0.43  | 0.44  | 0.56  | 0.77 | -0.80 ns |
| Utp15         | UTP15, U3 small nucleolar ribonucleoprotein, homolog (yeast)                         | 105372 | 0.46  | 0.67  | 0.83  | 0.55 | -0.68 ns |
| EG544973      |                                                                                      | 544973 | 15.31 | 15.93 | 13.90 | 1.10 | 0.10 ns  |
| H3f3a         |                                                                                      | 15078  | 15.31 | 15.93 | 13.90 | 1.10 | 0.10 ns  |
| LOC625328     |                                                                                      | 625328 | 15.31 | 15.93 | 13.90 | 1.10 | 0.10 ns  |
| Zfp574        | zinc finger protein 574                                                              | 232976 | 0.80  | 0.65  | 0.67  | 1.19 | 0.41 ns  |
| Lhfp12        | lipoma HMGIC fusion partner-like 2                                                   | 218454 | 0.29  | 0.48  | 0.30  | 0.94 | -0.47 ns |
| Rufy1         | RUN and FYVE domain containing 1                                                     | 216724 | 0.35  | 0.39  | 0.51  | 0.68 | -0.81 ns |
| E430025E21Rik | RIKEN cDNA E430025E21 gene                                                           | 223593 | 3.30  | 3.11  | 3.43  | 0.96 | -0.05 ns |
| Wdr42a        | WD repeat domain 42A                                                                 | 98193  | 1.19  | 1.07  | 0.70  | 1.69 | 0.39 ns  |
| B3galnt2      | UDP-GalNAc:betaGlcNAc beta 1,3-galactosaminyltransferase, polypeptide 2              | 97884  | 0.51  | 0.46  | 0.54  | 0.93 | -0.08 ns |
| Prune         | prune homolog (Drosophila)                                                           | 229589 | 0.94  | 0.86  | 0.63  | 1.49 | 0.87 *   |
| Ppm1d         | protein phosphatase 1D magnesium-dependent, delta isoform                            | 53892  | 0.87  | 0.84  | 0.75  | 1.16 | 0.86 *   |
| 2410187C16Rik | RIKEN cDNA 2410187C16 gene                                                           | 76773  | 0.39  | 0.34  | 0.62  | 0.63 | -0.31 ns |
| Shb           | src homology 2 domain-containing transforming protein B                              | 230126 | 0.77  | 0.77  | 0.70  | 1.10 | -0.21 ns |
| 2310061I04Rik | RIKEN cDNA 2310061I04 gene                                                           | 69662  | 0.86  | 0.67  | 0.66  | 1.30 | 0.08 ns  |
| Rab11fip4     | RAB11 family interacting protein 4 (class II)                                        | 268451 | 1.21  | 1.03  | 0.66  | 1.82 | 0.94 **  |
| Gmfs          | GDP-mannose 4, 6-dehydratase                                                         | 218138 | 1.09  | 1.10  | 1.05  | 1.03 | -0.21 ns |
| Lin52         | lin-52 homolog (C. elegans)                                                          | 217708 | 0.53  | 0.51  | 0.55  | 0.97 | 0.25 ns  |
| 2700078E11Rik | RIKEN cDNA 2700078E11 gene                                                           | 78832  | 1.73  | 1.92  | 1.27  | 1.35 | 0.42 ns  |
| Peo1          | progressive external ophthalmoplegia 1 (human)                                       | 226153 | 0.65  | 0.80  | 0.35  | 1.83 | 0.55 ns  |
| D19Bwg1357e   | DNA segment, Chr 19, Brigham & Women's Genetics 1357 expressed                       | 52874  | 2.88  | 3.71  | 2.69  | 1.07 | 0.37 ns  |
| Lysmd3        | LysM, putative peptidoglycan-binding, domain containing 3                            | 80289  | 0.42  | 0.62  | 0.79  | 0.53 | -0.71 ns |
| Mll3          | myeloid/lymphoid or mixed-lineage leukemia 3                                         | 231051 | 0.74  | 0.83  | 1.15  | 0.64 | -0.53 ns |
| LOC546078     |                                                                                      | 546078 | 1.19  | 1.22  | 1.35  | 0.88 | 0.23 ns  |
| Samd1         |                                                                                      | 666704 | 1.19  | 1.22  | 1.35  | 0.88 | 0.23 ns  |
| Map4k4        | mitogen-activated protein kinase kinase kinase 4                                     | 26921  | 0.90  | 0.98  | 0.87  | 1.02 | 0.02 ns  |
| Acaca         | acetyl-Coenzyme A carboxylase alpha                                                  | 107476 | 0.67  | 0.62  | 0.82  | 0.81 | -0.72 ns |
| Mtap2         | microtubule-associated protein 2                                                     | 17756  | 1.16  | 0.53  | 0.18  | 6.42 | 0.83 *   |
| Atrn          | attractin                                                                            | 11990  | 0.44  | 0.49  | 0.51  | 0.87 | -0.66 ns |
| 0910001L09Rik | RIKEN cDNA 0910001L09 gene                                                           | 66096  | 0.84  | 0.72  | 0.86  | 0.97 | -0.10 ns |
| Nudt19        | nudix (nucleoside diphosphate linked moiety X)-type motif 19                         | 110959 | 0.31  | 0.33  | 0.42  | 0.74 | -0.77 ns |
| C330019G07Rik | RIKEN cDNA C330019G07 gene                                                           | 215476 | 0.83  | 0.76  | 0.85  | 0.97 | -0.52 ns |
| Stim2         | stromal interaction molecule 2                                                       | 116873 | 1.22  | 1.36  | 1.45  | 0.84 | -0.80 ns |
| Nup98         | nucleoporin 98                                                                       | 269966 | 1.03  | 1.15  | 1.07  | 0.95 | 0.16 ns  |
| BC030863      | cDNA sequence BC030863                                                               | 194404 | 0.55  | 0.64  | 0.67  | 0.82 | -0.47 ns |
| Sipa11        | signal-induced proliferation-associated 1 like 1                                     | 217692 | 0.74  | 0.77  | 0.96  | 0.76 | -0.61 ns |
| Tbl2          | transducin (beta)-like 2                                                             | 27368  | 0.61  | 0.67  | 0.85  | 0.71 | -0.40 ns |
| Polb          | polymerase (DNA directed), beta                                                      | 18970  | 1.42  | 1.69  | 1.91  | 0.74 | -0.53 ns |
| Rpl35         | ribosomal protein L35                                                                | 66489  | 24.42 | 22.00 | 15.73 | 1.54 | 0.86 *   |
| 2610030H06Rik | RIKEN cDNA 2610030H06 gene                                                           | 67048  | 0.56  | 0.53  | 1.00  | 0.56 | -0.57 ns |
| Slc20a2       | solute carrier family 20, member 2                                                   | 20516  | 0.96  | 0.88  | 1.08  | 0.89 | -0.42 ns |
| Taf2          | TAF2 RNA polymerase II, TATA box binding protein (TBP)-associated factor             | 319944 | 1.09  | 1.04  | 1.18  | 0.93 | -0.23 ns |
| Wdr67         | WD repeat domain 67                                                                  | 210544 | 0.98  | 1.03  | 1.22  | 0.80 | 0.04 ns  |
| Usp37         | ubiquitin specific peptidase 37                                                      | 319651 | 1.25  | 1.15  | 1.26  | 0.99 | -0.58 ns |
| Cybas3        | cytochrome b, ascorbate dependent 3                                                  | 225912 | 0.71  | 0.86  | 0.75  | 0.94 | 0.18 ns  |
| Prkc          | protein kinase C, eta                                                                | 18755  | 0.21  | 0.25  | 0.44  | 0.47 | -0.89 *  |
| Cnot1         | CCR4-NOT transcription complex, subunit 1                                            | 234594 | 3.54  | 3.57  | 3.85  | 0.91 | 0.17 ns  |
| Phactr4       | phosphatase and actin regulator 4                                                    | 100169 | 0.62  | 0.46  | 0.50  | 1.23 | 0.06 ns  |
| F630110N24Rik | RIKEN cDNA F630110N24 gene                                                           | 73822  | 0.43  | 0.46  | 0.47  | 0.92 | -0.58 ns |
| Nek1          | NIMA (never in mitosis gene a)-related expressed kinase 1                            | 18004  | 0.67  | 0.67  | 0.71  | 0.94 | 0.30 ns  |
| Adar          | adenosine deaminase, RNA-specific                                                    | 56417  | 0.68  | 0.95  | 1.00  | 0.67 | -0.71 ns |
| Npcd          |                                                                                      | 504193 | 0.26  | 0.40  | 0.45  | 0.58 | -0.21 ns |
| Nptxr         |                                                                                      | 73340  | 0.26  | 0.40  | 0.45  | 0.58 | -0.21 ns |
| Ypel2         | yippee-like 2 (Drosophila)                                                           | 77864  | 0.44  | 0.38  | 0.37  | 1.20 | -0.33 ns |
| Mtm1          | X-linked myotubular myopathy gene 1                                                  | 17772  | 4.97  | 4.56  | 3.20  | 1.55 | 0.70 ns  |
| Wiz           | Widely-interspaced zinc finger motifs                                                | 22404  | 3.16  | 3.17  | 1.58  | 1.99 | 0.91 *   |
| Arid5b        | AT rich interactive domain 5B (Mrf1 like)                                            | 71371  | 1.06  | 0.94  | 1.15  | 0.92 | -0.65 ns |
| Bdp1          | B double prime 1, subunit of RNA polymerase III transcription initiation factor IIIB | 544971 | 1.06  | 1.60  | 1.92  | 0.55 | -0.81 ns |
| Frm4a         | FERM domain containing 4A                                                            | 209630 | 0.29  | 0.29  | 0.13  | 2.25 | 0.60 ns  |
| Bivm          | basic, immunoglobulin-like variable motif containing                                 | 246229 | 0.64  | 0.48  | 0.40  | 1.59 | 0.75 ns  |
| Gtdc1         | glycosyltransferase-like domain containing 1                                         | 227835 | 0.53  | 0.46  | 0.35  | 1.50 | 0.88 *   |
| Serf1         | small EDRK-rich factor 1                                                             | 20365  | 0.33  | 0.63  | 0.80  | 0.42 | -0.72 ns |
| Rab14         | RAB, member of RAS oncogene family-like 4                                            | 67042  | 0.96  | 1.14  | 1.13  | 0.84 | -0.42 ns |
| Raph1         | Ras association (RalGDS/AF-6) and pleckstrin homology domains 1                      | 77300  | 1.17  | 1.04  | 1.08  | 1.08 | 0.37 ns  |
| U2af114       | U2 small nuclear RNA auxiliary factor 1-like 4                                       | 233073 | 0.73  | 0.81  | 0.76  | 0.96 | 0.10 ns  |
| Rab3ip        | RAB3A interacting protein                                                            | 216363 | 2.16  | 1.97  | 1.46  | 1.48 | 0.31 ns  |
| Fntb          | farnesyltransferase, CAAX box, beta                                                  | 110606 | 0.71  | 0.66  | 0.93  | 0.76 | -0.14 ns |
| Bmpr2         | bone morphogenetic protein receptor, type II (serine/threonine kinase)               | 12168  | 3.22  | 2.98  | 2.25  | 1.42 | 0.75 ns  |
| Rab11fip5     | RAB11 family interacting protein 5 (class I)                                         | 52055  | 1.85  | 2.33  | 2.99  | 0.62 | -0.90 *  |
| Chsy1         | carbohydrate (chondroitin) synthase 1                                                | 269941 | 0.34  | 0.39  | 0.27  | 1.29 | 0.74 ns  |
| Tcfe3         | transcription factor E3                                                              | 209446 | 0.56  | 0.62  | 0.85  | 0.66 | -0.02 ns |
| Gtf3c4        | general transcription factor IIIC, polypeptide 4                                     | 269252 | 0.91  | 0.83  | 0.90  | 1.01 | -0.18 ns |
| Mical2        | MICAL-like 2                                                                         | 231830 | 0.39  | 0.43  | 0.61  | 0.63 | -0.58 ns |
| Adipor2       | adiponectin receptor 2                                                               | 68465  | 1.75  | 1.65  | 2.40  | 0.72 | -0.46 ns |
| Eif2c1        | eukaryotic translation initiation factor 2C, 1                                       | 236511 | 0.89  | 0.76  | 0.99  | 0.89 | -0.29 ns |
| Zzz3          | zinc finger, ZZ domain containing 3                                                  | 108946 | 2.24  | 2.08  | 1.56  | 1.43 | 0.18 ns  |
| Dip2b         | DIP2 disco-interacting protein 2 homolog B (Drosophila)                              | 239667 | 1.00  | 1.03  | 1.28  | 0.77 | -0.91 *  |
| Rcor1         | REST corepressor 1                                                                   | 217864 | 2.67  | 2.47  | 3.30  | 0.81 | -0.60 ns |
| Fnbp1         | formin binding protein 1-like                                                        | 214459 | 5.73  | 6.37  | 5.10  | 1.12 | -0.02 ns |
| Gpkow         | G patch domain and KOW motifs                                                        | 209416 | 1.03  | 1.22  | 1.77  | 0.58 | -0.13 ns |
| Fez2          | fasciculation and elongation protein zeta 2 (zyglin II)                              | 225020 | 0.65  | 0.53  | 0.43  | 1.51 | 0.74 ns  |
| Nup214        | nucleoporin 214                                                                      | 227720 | 0.94  | 0.87  | 0.81  | 1.15 | 0.41 ns  |

|               |                                                                         |        |       |       |       |      |          |
|---------------|-------------------------------------------------------------------------|--------|-------|-------|-------|------|----------|
| Psm5          | proteasome (prosome, macropain) subunit, alpha type 5                   | 26442  | 6.11  | 7.19  | 6.09  | 1.00 | -0.29 ns |
| BC055324      | cDNA sequence BC055324                                                  | 381306 | 0.64  | 0.67  | 0.67  | 0.94 | -0.15 ns |
| Nuff2         | nuclear transport factor 2                                              | 68051  | 11.29 | 11.92 | 12.10 | 0.93 | 0.15 ns  |
| Cryab         | crystallin, alpha B                                                     | 12955  | 3.34  | 2.86  | 2.88  | 1.15 | -0.15 ns |
| B930006L02Rik | RIKEN cDNA B930006L02 gene                                              | 319604 | 0.78  | 0.77  | 0.96  | 0.81 | -0.52 ns |
| Cd44          | CD44 antigen                                                            | 12505  | 0.36  | 0.69  | 1.21  | 0.30 | -0.71 ns |
| Mxd4          | Max dimerization protein 4                                              | 17122  | 0.53  | 0.55  | 0.40  | 1.32 | 0.57 ns  |
| Serinc2       | serine incorporator 2                                                   | 230779 | 0.81  | 0.91  | 1.19  | 0.68 | -0.57 ns |
| Pja2          | praja 2, RING-H2 motif containing                                       | 224938 | 2.11  | 1.67  | 1.31  | 1.60 | 0.88 *   |
| Nrip1         | nuclear receptor interacting protein 1                                  | 268903 | 2.01  | 1.82  | 1.28  | 1.56 | 0.51 ns  |
| Tom12         | target of myb1-like 2 (chicken)                                         | 216810 | 0.82  | 0.65  | 0.81  | 1.00 | 0.00 ns  |
| Itfg3         | integrin alpha FG-GAP repeat containing 3                               | 106581 | 2.22  | 2.06  | 1.22  | 1.81 | 0.62 ns  |
| Mobkl2a       | MOB1, Mps One Binder kinase activator-like 2A (yeast)                   | 208228 | 0.36  | 0.32  | 0.27  | 1.34 | 0.29 ns  |
| Sos1          | Son of sevenless homolog 1 (Drosophila)                                 | 20662  | 1.41  | 1.42  | 1.12  | 1.25 | 0.82 *   |
| Man1a2        | mannosidase, alpha, class 1A, member 2                                  | 17156  | 1.42  | 1.51  | 1.28  | 1.11 | 0.45 ns  |
| EG433297      |                                                                         | 433297 | 13.28 | 13.74 | 10.87 | 1.22 | 0.71 ns  |
| EG667952      |                                                                         | 667952 | 13.28 | 13.74 | 10.87 | 1.22 | 0.71 ns  |
| Myf6          |                                                                         | 17904  | 13.28 | 13.74 | 10.87 | 1.22 | 0.71 ns  |
| Zdhhc17       | zinc finger, DHHC domain containing 17                                  | 320150 | 0.40  | 0.25  | 0.13  | 3.04 | 0.72 ns  |
| Nkrf          | NF-kappaB repressing factor                                             | 77286  | 0.22  | 0.27  | 0.39  | 0.55 | -0.71 ns |
| Tgif2         | TGFB-induced factor 2                                                   | 228839 | 0.68  | 0.65  | 0.81  | 0.84 | -0.34 ns |
| Zcchc2        | zinc finger, CCHC domain containing 2                                   | 227449 | 0.71  | 0.70  | 0.71  | 0.99 | -0.51 ns |
| Samd8         | sterile alpha motif domain containing 8                                 | 67630  | 0.64  | 0.65  | 0.73  | 0.87 | -0.93 ** |
| Spred2        | sprouty-related, EVH1 domain containing 2                               | 114716 | 0.89  | 0.92  | 1.11  | 0.79 | -0.59 ns |
| C030011O14Rik | RIKEN cDNA C030011O14 gene                                              | 215708 | 0.30  | 0.47  | 0.69  | 0.43 | -0.88 *  |
| Srgap2        | SLIT-ROBO Rho GTPase activating protein 2                               | 14270  | 0.62  | 0.63  | 0.48  | 1.29 | 0.49 ns  |
| Atxn3         | ataxin 3                                                                | 110616 | 0.59  | 0.68  | 0.70  | 0.85 | -0.60 ns |
| Solh          | Small optic lobes homolog (Drosophila)                                  | 50817  | 2.42  | 1.76  | 1.21  | 1.99 | 0.80 ns  |
| Rfll          | ring finger and FYVE like domain containing protein                     | 67338  | 0.52  | 0.56  | 0.60  | 0.86 | -0.70 ns |
| Tcerg1        | transcription elongation regulator 1 (CA150)                            | 56070  | 1.99  | 2.41  | 2.59  | 0.76 | -0.18 ns |
| Cox17         | cytochrome c oxidase, subunit XVII assembly protein homolog (yeast)     | 12856  | 2.72  | 2.92  | 5.08  | 0.53 | -0.70 ns |
| Morc4         | microorchidia 4                                                         | 75746  | 0.59  | 0.72  | 1.12  | 0.53 | 0.04 ns  |
| Rrm2          | ribonucleotide reductase M2                                             | 20135  | 6.02  | 6.28  | 9.66  | 0.62 | -0.39 ns |
| Samhd1        | SAM domain and HD domain, 1                                             | 56045  | 0.57  | 0.51  | 0.50  | 1.14 | 0.40 ns  |
| 1110018J18Rik | RIKEN cDNA 1110018J18 gene                                              | 66129  | 0.69  | 0.95  | 1.23  | 0.56 | -0.71 ns |
| Zfp715        | zinc finger protein 715                                                 | 69930  | 0.58  | 0.50  | 0.60  | 0.96 | 0.34 ns  |
| BC088983      | cDNA sequence BC088983                                                  | 382010 | 0.55  | 0.59  | 0.60  | 0.91 | 0.32 ns  |
| Vldlr         | very low density lipoprotein receptor                                   | 22359  | 3.50  | 4.23  | 4.04  | 0.86 | -0.63 ns |
| Otud4         | OTU domain containing 4                                                 | 73945  | 1.91  | 2.53  | 2.61  | 0.73 | -0.79 ns |
| Dusp3         | dual specificity phosphatase 3 (vaccinia virus phosphatase VH1-related) | 72349  | 0.70  | 0.76  | 0.81  | 0.86 | -0.10 ns |
| Slc16a5       | solute carrier family 16 (monocarboxylic acid transporters), member 5   | 217316 | 0.61  | 0.50  | 0.36  | 1.68 | 0.64 ns  |
| Crtc1         | CREB regulated transcription coactivator 1                              | 382056 | 0.39  | 0.29  | 0.28  | 1.39 | 0.62 ns  |
| Heca          | headcase homolog (Drosophila)                                           | 380629 | 0.93  | 1.01  | 1.26  | 0.73 | -0.79 ns |
| Usp12         | ubiquitin specific peptidase 12                                         | 22217  | 0.51  | 0.42  | 0.47  | 1.08 | -0.21 ns |
| Mef2d         | myocyte enhancer factor 2D                                              | 17261  | 1.13  | 1.02  | 0.85  | 1.33 | 0.52 ns  |
| Elmo3         | engulfment and cell motility 3, ced-12 homolog (C. elegans)             | 234683 | 0.65  | 0.72  | 0.93  | 0.69 | -0.94 ** |
| Npepl1        | aminopeptidase-like 1                                                   | 228961 | 0.87  | 1.05  | 1.04  | 0.83 | -0.65 ns |
| Rapgef6       | Rap guanine nucleotide exchange factor (GEF) 6                          | 192786 | 1.79  | 1.74  | 1.73  | 1.03 | 0.00 ns  |
| Phkb          | phosphorylase kinase beta                                               | 102093 | 0.85  | 0.95  | 0.63  | 1.35 | 0.33 ns  |
| EG632248      |                                                                         | 632248 | 4.16  | 4.12  | 3.01  | 1.38 | 0.88 *   |
| Atp13a3       | ATPase type 13A3                                                        | 224088 | 3.12  | 2.75  | 3.37  | 0.92 | -0.62 ns |
| Rbm15         | RNA binding motif protein 15                                            | 229700 | 0.76  | 0.96  | 0.95  | 0.80 | -0.26 ns |
| Phka2         | phosphorylase kinase alpha 2                                            | 110094 | 0.38  | 0.43  | 0.61  | 0.63 | -0.08 ns |
| Eif2b3        | eukaryotic translation initiation factor 2B, subunit 3                  | 108067 | 0.37  | 0.34  | 0.51  | 0.71 | -0.33 ns |
| Eif2b2        | eukaryotic translation initiation factor 2B, subunit 2 beta             | 217715 | 2.70  | 2.62  | 2.86  | 0.94 | -0.08 ns |
| Khdrbs1       | KH domain containing, RNA binding, signal transduction associated 1     | 20218  | 3.91  | 4.09  | 4.30  | 0.91 | -0.79 ns |
| Bola2         | bolA-like 2 (E. coli)                                                   | 66162  | 0.63  | 0.85  | 0.95  | 0.66 | -0.53 ns |
| Smg5          | Smg-5 homolog, nonsense mediated mRNA decay factor (C. elegans)         | 229512 | 0.96  | 1.03  | 0.79  | 1.20 | 0.13 ns  |
| Anp32a        | acidic (leucine-rich) nuclear phosphoprotein 32 family, member A        | 11737  | 1.68  | 1.65  | 1.08  | 1.55 | 0.90 *   |
| Hip1          | huntingtin interacting protein 1                                        | 215114 | 0.35  | 0.48  | 0.40  | 0.87 | 0.02 ns  |
| Wdr47         | WD repeat domain 47                                                     | 99512  | 0.62  | 0.63  | 0.59  | 1.06 | -0.40 ns |
| Asx1          | additional sex combs like 1 (Drosophila)                                | 228790 | 1.04  | 1.25  | 1.42  | 0.73 | -0.27 ns |
| E2f3          | E2F transcription factor 3                                              | 13557  | 0.59  | 0.58  | 0.57  | 1.02 | -0.43 ns |
| Cgrf1         | cell growth regulator with ring finger domain 1                         | 68755  | 0.61  | 0.54  | 0.56  | 1.08 | 0.56 ns  |
| 4732496O08Rik | RIKEN cDNA 4732496O08 gene                                              | 242736 | 0.39  | 0.41  | 0.44  | 0.88 | -0.23 ns |
| Vps13b        | vacuolar protein sorting 13B (yeast)                                    | 666173 | 1.15  | 1.27  | 1.11  | 1.04 | 0.56 ns  |
| Epb4.111      | erythrocyte protein band 4.1-like 1                                     | 13821  | 0.92  | 0.91  | 0.99  | 0.93 | -0.22 ns |
| BC052040      | cDNA sequence BC052040                                                  | 399568 | 0.78  | 0.66  | 0.60  | 1.30 | 0.17 ns  |
| Enpp4         | ectonucleotide pyrophosphatase/phosphodiesterase 4                      | 224794 | 0.98  | 0.76  | 0.78  | 1.25 | 0.47 ns  |
| Ptdss2        | phosphatidylserine synthase 2                                           | 27388  | 1.78  | 1.46  | 1.80  | 0.99 | -0.35 ns |
| Eif5a2        | eukaryotic translation initiation factor 5A2                            | 208691 | 0.40  | 0.47  | 0.44  | 0.89 | -0.63 ns |
| Larp5         | La ribonucleoprotein domain family, member 5                            | 217980 | 4.26  | 4.54  | 5.02  | 0.84 | -0.32 ns |
| Eif5b         | eukaryotic translation initiation factor 5B                             | 226982 | 1.45  | 1.54  | 1.26  | 1.15 | 0.67 ns  |
| ErbB3         | v-erb-b2 erythroblastic leukemia viral oncogene homolog 3 (avian)       | 13867  | 4.09  | 3.72  | 3.84  | 1.06 | -0.34 ns |
| Ddx52         | DEAD (Asp-Glu-Ala-Asp) box polypeptide 52                               | 78394  | 0.98  | 1.03  | 1.24  | 0.79 | -0.74 ns |
| Ddx52         | DEAD (Asp-Glu-Ala-Asp) box polypeptide 52                               | 78394  | 0.72  | 0.63  | 0.78  | 0.91 | -0.58 ns |
| Vprbp         | Vpr (HIV-1) binding protein                                             | 321006 | 1.07  | 0.93  | 1.12  | 0.95 | 0.35 ns  |
| 1810013L24Rik | RIKEN cDNA 1810013L24 gene                                              | 69053  | 3.33  | 2.78  | 2.29  | 1.45 | 0.44 ns  |
| 4932417H02Rik | RIKEN cDNA 4932417H02 gene                                              | 74370  | 0.43  | 0.47  | 0.54  | 0.79 | -0.05 ns |
| lqce          | IQ motif containing E                                                   | 74239  | 0.36  | 0.48  | 0.29  | 1.24 | 0.24 ns  |
| 4930432O21Rik | RIKEN cDNA 4930432O21 gene                                              | 74670  | 1.30  | 1.15  | 0.72  | 1.79 | 0.85 *   |
| Nrf1          | Nuclear respiratory factor 1                                            | 18181  | 0.57  | 0.55  | 0.57  | 0.99 | 0.34 ns  |
| Rhpn2         | rhophilin, Rho GTPase binding protein 2                                 | 52428  | 1.94  | 2.58  | 1.87  | 1.03 | -0.49 ns |
| Ankrd28       | ankyrin repeat domain 28                                                | 105522 | 0.64  | 0.64  | 0.69  | 0.92 | -0.44 ns |
| Sin3b         | transcriptional regulator, SIN3B (yeast)                                | 20467  | 1.61  | 1.49  | 1.67  | 0.96 | 0.43 ns  |
| Hsd17b11      | hydroxysteroid (17-beta) dehydrogenase 11                               | 114664 | 4.93  | 5.54  | 4.50  | 1.09 | -0.02 ns |
| Sap18         | Sin3-associated polypeptide 18                                          | 20220  | 3.69  | 3.31  | 3.65  | 1.00 | 0.25 ns  |

|               |                                                                                               |        |       |       |       |      |          |
|---------------|-----------------------------------------------------------------------------------------------|--------|-------|-------|-------|------|----------|
| Ccm2          | cerebral cavernous malformation 2 homolog (human)                                             | 216527 | 1.64  | 1.98  | 2.27  | 0.72 | -0.47 ns |
| Cdc42bbp      | Cdc42 binding protein kinase beta                                                             | 217866 | 1.42  | 1.39  | 1.62  | 0.87 | -0.83 *  |
| Cog3          | component of oligomeric golgi complex 3                                                       | 338337 | 1.01  | 0.96  | 1.12  | 0.90 | -0.47 ns |
| Foxk1         | forkhead box K1                                                                               | 17425  | 0.61  | 0.51  | 0.67  | 0.90 | -0.43 ns |
| B230339M05Rik | RIKEN cDNA B230339M05 gene                                                                    | 228850 | 1.11  | 1.10  | 1.36  | 0.81 | -0.33 ns |
| 3110056O03Rik | RIKEN cDNA 3110056O03 gene                                                                    | 73218  | 0.60  | 0.40  | 0.33  | 1.80 | 0.65 ns  |
| 5830411G16Rik | RIKEN cDNA 5830411G16 gene                                                                    | 78937  | 0.87  | 0.74  | 1.05  | 0.83 | -0.72 ns |
| Alkbh1        | alkB, alkylation repair homolog 1 (E. coli)                                                   | 211064 | 0.59  | 0.52  | 0.58  | 1.02 | -0.19 ns |
| Atg4a         | autophagy-related 4A (yeast)                                                                  | 666468 | 0.25  | 0.32  | 0.50  | 0.50 | -0.34 ns |
| Aga           | aspartylglucosaminidase                                                                       | 11593  | 0.50  | 0.57  | 0.60  | 0.83 | -0.63 ns |
| Lyst          | lysosomal trafficking regulator                                                               | 17101  | 0.51  | 0.49  | 0.52  | 0.99 | -0.17 ns |
| Mtmr9         | myotubularin related protein 9                                                                | 210376 | 0.96  | 0.85  | 0.92  | 1.04 | 0.55 ns  |
| Mbnl3         | muscleblind-like 3 (Drosophila)                                                               | 171170 | 1.44  | 1.27  | 1.51  | 0.95 | 0.35 ns  |
| Plekhg3       | pleckstrin homology domain containing, family G (with RhoGef domain) member 3                 | 263406 | 1.50  | 1.42  | 1.26  | 1.18 | 0.89 *   |
| Zfp770        | zinc finger protein 770                                                                       | 228491 | 0.59  | 0.39  | 0.31  | 1.86 | 0.86 *   |
| Rin3          | Ras and Rab interactor 3                                                                      | 217835 | 0.52  | 0.47  | 0.67  | 0.77 | -0.42 ns |
| D3Erttd300e   | DNA segment, Chr 3, ERATO Doi 300, expressed                                                  | 56790  | 0.59  | 0.55  | 0.46  | 1.28 | 0.43 ns  |
| Zfp637        | zinc finger protein 637                                                                       | 232337 | 0.53  | 0.67  | 0.63  | 0.83 | -0.72 ns |
| Lycat         | lysocardiolipin acyltransferase                                                               | 225010 | 0.67  | 0.81  | 0.55  | 1.21 | 0.38 ns  |
| 1110034B05Rik | RIKEN cDNA 1110034B05 gene                                                                    | 68736  | 0.46  | 0.47  | 0.35  | 1.32 | 0.51 ns  |
| Lrrc8a        | leucine rich repeat containing 8A                                                             | 241296 | 1.10  | 1.10  | 0.98  | 1.12 | 0.43 ns  |
| Dtl           | denticleless homolog (Drosophila)                                                             | 76843  | 1.54  | 1.84  | 1.41  | 1.09 | 0.40 ns  |
| Ift52         | intraflagellar transport 52 homolog (Chlamydomonas)                                           | 245866 | 1.02  | 1.02  | 1.08  | 0.94 | -0.02 ns |
| 6030408C04Rik | RIKEN cDNA 6030408C04 gene                                                                    | 217558 | 1.08  | 0.95  | 1.45  | 0.74 | -0.13 ns |
| Extl3         | exostosins (multiple)-like 3                                                                  | 54616  | 0.46  | 0.64  | 0.52  | 0.88 | -0.10 ns |
| Ctbp2         | C-terminal binding protein 2                                                                  | 13017  | 2.30  | 2.28  | 2.16  | 1.06 | 0.03 ns  |
| Sbf1          | SET binding factor 1                                                                          | 77980  | 0.90  | 0.88  | 1.06  | 0.84 | -0.30 ns |
| BC030867      | cDNA sequence BC030867                                                                        | 217216 | 0.39  | 0.36  | 0.58  | 0.67 | -0.31 ns |
| Smcr7l        | Smith-Magenis syndrome chromosome region, candidate 7-like (human)                            | 239555 | 0.91  | 0.88  | 1.03  | 0.89 | -0.16 ns |
| Obfc1         | oligonucleotide/oligosaccharide-binding fold containing 1                                     | 108689 | 0.72  | 0.94  | 0.77  | 0.93 | -0.19 ns |
| Yrdc          | yrdC domain containing (E.coli)                                                               | 230734 | 0.51  | 0.53  | 0.71  | 0.72 | -0.68 ns |
| Mga           | MAX gene associated                                                                           | 29808  | 0.62  | 0.39  | 0.40  | 1.54 | -0.10 ns |
| Ckap2         | cytoskeleton associated protein 2                                                             | 80986  | 1.88  | 2.22  | 2.72  | 0.69 | -0.27 ns |
| Exoc3         | exocyst complex component 3                                                                   | 211446 | 0.53  | 0.82  | 0.97  | 0.54 | -0.69 ns |
| Nfrkb         | nuclear factor related to kappa B binding protein                                             | 235134 | 0.81  | 0.72  | 0.61  | 1.32 | 0.81 *   |
| Garnl4        | GTPase activating RANGAP domain-like 4                                                        | 380711 | 0.65  | 0.47  | 0.56  | 1.16 | -0.05 ns |
| Cbfa2t2       | core-binding factor, runt domain, alpha subunit 2, translocated to, 2 (human)                 | 12396  | 1.24  | 1.04  | 1.33  | 0.93 | -0.59 ns |
| Akap11        | A kinase (PRKA) anchor protein 11                                                             | 219181 | 2.50  | 1.83  | 1.73  | 1.43 | 0.30 ns  |
| Ep300         | E1A binding protein p300                                                                      | 328572 | 3.22  | 2.16  | 2.00  | 1.60 | 0.83 *   |
| C79407        | expressed sequence C79407                                                                     | 217653 | 1.12  | 1.33  | 1.54  | 0.72 | -0.41 ns |
| Slc2a1        | solute carrier family 2 (facilitated glucose transporter), member 1                           | 20525  | 3.31  | 4.04  | 6.52  | 0.51 | -0.71 ns |
| Pard3         | par-3 (partitioning defective 3) homolog (C. elegans)                                         | 93742  | 0.99  | 0.87  | 0.55  | 1.78 | 0.89 *   |
| Wapal         | Wings apart-like homolog (Drosophila)                                                         | 218914 | 2.16  | 1.91  | 1.92  | 1.12 | 0.32 ns  |
| Usp42         | ubiquitin specific peptidase 42                                                               | 76800  | 0.78  | 0.87  | 1.07  | 0.73 | -0.71 ns |
| Tmem106c      | transmembrane protein 106C                                                                    | 380967 | 2.05  | 1.84  | 2.16  | 0.94 | -0.48 ns |
| Lta4h         | leukotriene A4 hydrolase                                                                      | 16993  | 2.38  | 2.13  | 2.16  | 1.09 | 0.25 ns  |
| Atp6V0a2      | ATPase, H+ transporting, lysosomal V0 subunit A2                                              | 21871  | 0.59  | 0.45  | 0.44  | 1.32 | 0.39 ns  |
| Exoc6b        | exocyst complex component 6B                                                                  | 75914  | 0.51  | 0.52  | 0.51  | 1.00 | 0.21 ns  |
| Mllt1         | myeloid/lymphoid or mixed lineage-leukemia translocation to 1 homolog (Drosophila)            | 64144  | 0.68  | 0.67  | 0.47  | 1.45 | 0.78 ns  |
| Palb2         | partner and localizer of BRCA2                                                                | 233826 | 0.37  | 0.30  | 0.40  | 0.90 | -0.12 ns |
| Dok7          | docking protein 7                                                                             | 231134 | 0.45  | 0.36  | 0.24  | 1.91 | 0.83 *   |
| Wars          | tryptophanyl-tRNA synthetase                                                                  | 22375  | 0.94  | 1.16  | 1.08  | 0.87 | -0.05 ns |
| Gpi1          | glucose phosphate isomerase 1                                                                 | 14751  | 10.28 | 10.19 | 13.34 | 0.77 | -0.30 ns |
| Mapkapk3      | mitogen-activated protein kinase-activated protein kinase 3                                   | 102626 | 0.50  | 0.63  | 0.34  | 1.48 | 0.60 ns  |
| Vps33a        | vacuolar protein sorting 33A (yeast)                                                          | 77573  | 0.61  | 0.62  | 0.52  | 1.16 | 0.56 ns  |
| Pkig          | protein kinase inhibitor, gamma                                                               | 18769  | 1.27  | 1.40  | 1.59  | 0.79 | -0.35 ns |
| Brd1          | bromodomain containing 1                                                                      | 223770 | 1.22  | 1.20  | 1.19  | 1.02 | -0.41 ns |
| Pphln1        | periphilin 1                                                                                  | 223828 | 1.16  | 1.06  | 1.12  | 1.02 | 0.20 ns  |
| Baz1b         | bromodomain adjacent to zinc finger domain, 1B                                                | 22385  | 3.18  | 3.07  | 3.04  | 1.04 | 0.30 ns  |
| Tnrc18        | trinucleotide repeat containing 18                                                            | 231861 | 1.48  | 1.18  | 0.83  | 1.78 | 0.91 *   |
| Thoc6         | THO complex 6 homolog (Drosophila)                                                            | 386612 | 0.68  | 0.60  | 0.44  | 1.54 | 0.77 ns  |
| B430201A12Rik | RIKEN cDNA B430201A12 gene                                                                    | 329739 | 2.03  | 1.20  | 0.84  | 2.39 | 0.56 ns  |
| Cbl           | Casitas B-lineage lymphoma                                                                    | 12402  | 1.19  | 0.92  | 0.89  | 1.33 | 0.81 ns  |
| Nfatc2ip      | nuclear factor of activated T-cells, cytoplasmic, calcineurin-dependent 2 interacting protein | 18020  | 0.55  | 0.66  | 0.82  | 0.67 | -0.34 ns |
| Mdc1          | mediator of DNA damage checkpoint 1                                                           | 240087 | 1.01  | 1.01  | 0.90  | 1.12 | 0.42 ns  |
| Tbl1xr1       | transducin (beta)-like 1X-linked receptor 1                                                   | 81004  | 1.34  | 1.66  | 1.35  | 0.99 | -0.29 ns |
| Upf3b         | UPF3 regulator of nonsense transcripts homolog B (yeast)                                      | 68134  | 1.28  | 1.43  | 1.46  | 0.87 | -0.21 ns |
| A430041B07Rik | RIKEN cDNA A430041B07 gene                                                                    | 328108 | 2.79  | 2.77  | 2.87  | 0.97 | -0.37 ns |
| Dennd4c       | DENN/MADD domain containing 4C                                                                | 329877 | 0.75  | 0.71  | 1.05  | 0.71 | -0.85 *  |
| Iqgap3        | IQ motif containing GTPase activating protein 3                                               | 404710 | 1.37  | 1.57  | 1.88  | 0.73 | -0.27 ns |
| Crb3          | crumbs homolog 3 (Drosophila)                                                                 | 224912 | 1.22  | 1.09  | 0.90  | 1.34 | 0.95 **  |
| Mkrr1         | makorin, ring finger protein, 1                                                               | 54484  | 2.27  | 2.74  | 2.76  | 0.82 | -0.14 ns |
| Amdhd2        | amidohydrolase domain containing 2                                                            | 245847 | 0.40  | 0.40  | 0.36  | 1.10 | -0.42 ns |
| Ankrd44       | ankyrin repeat domain 44                                                                      | 329154 | 0.81  | 0.70  | 0.48  | 1.68 | 0.63 ns  |
| Umps          | uridine monophosphate synthetase                                                              | 22247  | 1.00  | 1.00  | 0.67  | 1.50 | 0.75 ns  |
| Exoc7         | exocyst complex component 7                                                                   | 53413  | 0.85  | 0.81  | 1.12  | 0.75 | 0.02 ns  |
| Slc4a11       | solute carrier family 4, sodium bicarbonate transporter-like, member 11                       | 269356 | 0.92  | 1.34  | 1.97  | 0.47 | -0.79 ns |
| Rpl37         |                                                                                               | 67281  | 22.45 | 23.07 | 19.79 | 1.13 | 0.75 ns  |
| Centb1        | centaurin, beta 1                                                                             | 216859 | 0.48  | 0.66  | 1.50  | 0.32 | -0.43 ns |
| Hmgn3         | high mobility group nucleosomal binding domain 3                                              | 94353  | 3.21  | 2.57  | 1.12  | 2.87 | 0.97 **  |
| Glt8d3        | glycosyltransferase 8 domain containing 3                                                     | 223827 | 1.13  | 1.07  | 1.21  | 0.93 | 0.15 ns  |
| Cdc34         | cell division cycle 34 homolog (S. cerevisiae)                                                | 216150 | 1.32  | 1.18  | 1.54  | 0.86 | -0.64 ns |

|               |                                                                                             |        |      |      |       |      |          |
|---------------|---------------------------------------------------------------------------------------------|--------|------|------|-------|------|----------|
| Etv6          | ets variant gene 6 (TEL oncogene)                                                           | 14011  | 0.75 | 0.79 | 0.74  | 1.01 | -0.21 ns |
| Opa3          | optic atrophy 3 (human)                                                                     | 403187 | 0.36 | 0.41 | 0.58  | 0.61 | -0.53 ns |
| Plekha7       | pleckstrin homology domain containing, family A member 7                                    | 233765 | 0.38 | 0.40 | 0.33  | 1.16 | 0.66 ns  |
| Opa1          | optic atrophy 1 homolog (human)                                                             | 74143  | 2.35 | 2.32 | 2.20  | 1.06 | 0.83 *   |
| Ptgrn         | prostaglandin F2 receptor negative regulator                                                | 19221  | 2.19 | 2.80 | 2.56  | 0.85 | 0.02 ns  |
| Rbbp4         | retinoblastoma binding protein 4                                                            | 19646  | 8.21 | 8.02 | 9.08  | 0.90 | -0.50 ns |
| Zc3h13        | zinc finger CCH type containing 13                                                          | 67302  | 0.44 | 0.57 | 0.54  | 0.81 | 0.11 ns  |
| Ppp1r13b      | protein phosphatase 1, regulatory (inhibitor) subunit 13B                                   | 21981  | 0.97 | 0.93 | 1.36  | 0.71 | -0.81 ns |
| Zfp422-rs1    | zinc finger protein 422, related sequence 1                                                 | 77652  | 0.74 | 0.83 | 0.61  | 1.20 | 0.61 ns  |
| Slc25a4       | solute carrier family 25 (mitochondrial carrier, adenine nucleotide translocator), member 4 | 11739  | 5.40 | 5.37 | 5.39  | 1.00 | 0.02 ns  |
| Mkl1          | MKL (megakaryoblastic leukemia)/myocardin-like 1                                            | 223701 | 1.34 | 1.45 | 1.51  | 0.88 | -0.81 ns |
| Zbtb2         | zinc finger and BTB domain containing 2                                                     | 381990 | 0.71 | 0.66 | 0.47  | 1.49 | 0.82 *   |
| Tbpl1         | TATA box binding protein-like 1                                                             | 237336 | 0.71 | 0.57 | 0.57  | 1.25 | 0.40 ns  |
| A830080D01Rik | RIKEN cDNA A830080D01 gene                                                                  | 382252 | 0.79 | 0.81 | 0.95  | 0.83 | 0.26 ns  |
| Arhgap19      | Rho GTPase activating protein 19                                                            | 71085  | 0.79 | 0.81 | 0.71  | 1.10 | 0.71 ns  |
| Cobl          | cordon-bleu                                                                                 | 12808  | 1.07 | 1.02 | 1.03  | 1.03 | 0.07 ns  |
| Evl           | Ena-vasodilator stimulated phosphoprotein                                                   | 14026  | 0.92 | 1.56 | 1.76  | 0.52 | -0.79 ns |
| Phf12         | PHD finger protein 12                                                                       | 268448 | 0.32 | 0.31 | 0.25  | 1.29 | 0.17 ns  |
| Cox19         | COX19 cytochrome c oxidase assembly homolog (S. cerevisiae)                                 | 68033  | 0.95 | 0.96 | 1.03  | 0.92 | -0.38 ns |
| Phf2          | PHD finger protein 2                                                                        | 18676  | 1.01 | 0.87 | 0.93  | 1.08 | 0.23 ns  |
| Arhgef11      |                                                                                             | 213498 | 0.58 | 0.59 | 0.61  | 0.95 | -0.66 ns |
| Gas2l1        | growth arrest-specific 2 like 1                                                             | 78926  | 1.28 | 1.19 | 1.37  | 0.93 | -0.41 ns |
| Tpcn1         | two pore channel 1                                                                          | 252972 | 0.43 | 0.35 | 0.31  | 1.39 | 0.49 ns  |
| Atpaf1        | ATP synthase mitochondrial F1 complex assembly factor 1                                     | 230649 | 0.35 | 0.33 | 0.63  | 0.56 | -0.67 ns |
| Aak1          | AP2 associated kinase 1                                                                     | 269774 | 2.40 | 2.44 | 2.28  | 1.05 | 0.54 ns  |
| Hirip3        | HIRA interacting protein 3                                                                  | 233876 | 0.99 | 1.07 | 1.38  | 0.71 | -0.56 ns |
| Esf1          | ESF1, nucleolar pre-rRNA processing protein, homolog (S. cerevisiae)                        | 66580  | 0.93 | 1.34 | 1.24  | 0.74 | -0.36 ns |
| Ccdc93        | coiled-coil domain containing 93                                                            | 70829  | 0.85 | 0.75 | 0.43  | 1.95 | 0.65 ns  |
| Mpp5          | membrane protein, palmitoylated 5 (MAGUK p55 subfamily member 5)                            | 56217  | 1.17 | 1.07 | 1.18  | 0.98 | -0.39 ns |
| Rnf170        | ring finger protein 170                                                                     | 77733  | 0.44 | 0.56 | 0.69  | 0.64 | -0.61 ns |
| Cdon          | cell adhesion molecule-related/down-regulated by oncogenes                                  | 57810  | 1.00 | 0.57 | 0.62  | 1.59 | 0.42 ns  |
| Supt3h        | suppressor of Ty 3 homolog (S. cerevisiae)                                                  | 109115 | 0.43 | 0.38 | 0.24  | 1.77 | 0.90 *   |
| Zswim6        | zinc finger, SWIM domain containing 6                                                       | 67263  | 0.36 | 0.52 | 0.76  | 0.47 | -0.83 *  |
| Actr3         | ARP3 actin-related protein 3 homolog (yeast)                                                | 74117  | 4.86 | 5.06 | 4.25  | 1.14 | 0.00 ns  |
| Eif4ebp1      | eukaryotic translation initiation factor 4E binding protein 1                               | 13685  | 3.00 | 3.95 | 4.85  | 0.61 | -0.65 ns |
| E130303B06Rik | RIKEN cDNA E130303B06 gene                                                                  | 102124 | 0.72 | 0.60 | 0.73  | 0.98 | 0.25 ns  |
| Fbxw17        | F-box and WD-40 domain protein 17                                                           | 109082 | 0.52 | 0.50 | 0.76  | 0.68 | -0.32 ns |
| Dedd          | death effector domain-containing                                                            | 21945  | 0.46 | 0.66 | 0.62  | 0.74 | -0.77 ns |
| Slc25a16      | solute carrier family 25 (mitochondrial carrier, Graves disease autoantigen), member 16     | 73132  | 0.65 | 0.61 | 0.75  | 0.87 | -0.44 ns |
| Cdc2l6        | cell division cycle 2-like 6 (CDK8-like)                                                    | 78334  | 0.88 | 0.66 | 0.57  | 1.54 | 0.76 ns  |
| Suv420h1      | suppressor of variegation 4-20 homolog 1 (Drosophila)                                       | 225888 | 0.76 | 0.73 | 0.61  | 1.24 | 0.65 ns  |
| zfp507        | zinc finger protein 507                                                                     | 668501 | 0.83 | 0.81 | 0.85  | 0.98 | 0.18 ns  |
| Pank4         | pantothenate kinase 4                                                                       | 269614 | 0.47 | 0.47 | 0.45  | 1.03 | 0.12 ns  |
| Cenpe         | centromere protein E                                                                        | 229841 | 1.87 | 2.03 | 1.83  | 1.01 | 0.57 ns  |
| Abcb7         | ATP-binding cassette, sub-family B (MDR/TAP), member 7                                      | 11306  | 1.00 | 0.87 | 1.06  | 0.94 | -0.35 ns |
| Slc9a6        | solute carrier family 9 (sodium/hydrogen exchanger), isoform 6                              | 236794 | 0.79 | 0.76 | 0.84  | 0.94 | -0.50 ns |
| Asb7          | ankyrin repeat and SOCS box-containing protein 7                                            | 117589 | 0.69 | 0.63 | 0.68  | 1.01 | 0.08 ns  |
| Heatr2        | HEAT repeat containing 2                                                                    | 433956 | 0.60 | 0.49 | 0.73  | 0.82 | -0.67 ns |
| Trak2         | trafficking protein, kinesin binding 2                                                      | 70827  | 0.71 | 0.49 | 0.53  | 1.33 | 0.35 ns  |
| 5930434B04Rik | RIKEN cDNA 5930434B04 gene                                                                  | 381356 | 0.80 | 0.78 | 0.82  | 0.98 | -0.50 ns |
| Atxn7l3       | ataxin 7-like 3                                                                             | 217218 | 1.34 | 1.34 | 1.56  | 0.86 | -0.24 ns |
| Itsn2         | intersectin 2                                                                               | 20403  | 1.18 | 1.30 | 1.36  | 0.86 | 0.01 ns  |
| Ogfod1        | 2-oxoglutarate and iron-dependent oxygenase domain containing 1                             | 270086 | 0.20 | 0.30 | 0.30  | 0.66 | -0.12 ns |
| Golga1        | golgi autoantigen, golgin subfamily a, 1                                                    | 76899  | 0.48 | 0.41 | 0.50  | 0.96 | 0.28 ns  |
| Wdr7          | WD repeat domain 7                                                                          | 104082 | 0.42 | 0.41 | 0.41  | 1.02 | 0.53 ns  |
| Upf2          | UPF2 regulator of nonsense transcripts homolog (yeast)                                      | 326622 | 1.52 | 1.36 | 1.06  | 1.42 | 0.91 *   |
| Golgb1        | golgi autoantigen, golgin subfamily b, macrogolgin 1                                        | 224139 | 1.34 | 1.27 | 1.42  | 0.94 | -0.41 ns |
| Arhgef4       | Rho guanine nucleotide exchange factor (GEF) 4                                              | 226970 | 0.18 | 0.36 | 0.18  | 1.01 | 0.29 ns  |
| Rg9mtd2       | RNA (guanine-9-) methyltransferase domain containing 2                                      | 108943 | 0.85 | 0.82 | 0.46  | 1.83 | 0.26 ns  |
| D10Bwg1379e   | DNA segment, Chr 10, Brigham & Women's Genetics 1379 expressed                              | 215821 | 0.67 | 0.68 | 0.18  | 3.62 | 0.75 ns  |
| Wdr44         | WD repeat domain 44                                                                         | 72404  | 0.28 | 0.25 | 0.43  | 0.64 | -0.39 ns |
| Eme1          | essential meiotic endonuclease 1 homolog 1 (S. pombe)                                       | 268465 | 0.40 | 0.33 | 0.45  | 0.88 | 0.02 ns  |
| EG545878      |                                                                                             | 545878 | 1.19 | 1.07 | 0.99  | 1.20 | 0.74 ns  |
| Tom1          |                                                                                             | 21968  | 1.19 | 1.07 | 0.99  | 1.20 | 0.74 ns  |
| B230208H17Rik | RIKEN cDNA B230208H17 gene                                                                  | 227624 | 1.05 | 1.03 | 0.90  | 1.16 | 0.26 ns  |
| Zfyve1        | zinc finger, FYVE domain containing 1                                                       | 217695 | 0.50 | 0.51 | 0.62  | 0.80 | -0.69 ns |
| Tmem106b      | transmembrane protein 106B                                                                  | 71900  | 4.78 | 3.90 | 5.50  | 0.87 | -0.46 ns |
| 2310047D13Rik | RIKEN cDNA 2310047D13 gene                                                                  | 116972 | 0.63 | 0.59 | 0.49  | 1.27 | 0.59 ns  |
| Ctxn1         | cortexin 1                                                                                  | 330695 | 1.74 | 1.57 | 1.55  | 1.12 | 0.72 ns  |
| Klhdc2        | kelch domain containing 2                                                                   | 69554  | 2.02 | 2.19 | 2.85  | 0.70 | -0.57 ns |
| Zfp568        | zinc finger protein 568                                                                     | 243905 | 0.36 | 0.39 | 0.40  | 0.88 | 0.09 ns  |
| Zfyve20       | zinc finger, FYVE domain containing 20                                                      | 78287  | 0.56 | 0.62 | 0.58  | 0.95 | 0.20 ns  |
| Ric8b         | resistance to inhibitors of cholinesterase 8 homolog B (C. elegans)                         | 237422 | 0.65 | 0.43 | 0.47  | 1.39 | 0.39 ns  |
| Utp14a        | UTP14, U3 small nucleolar ribonucleoprotein, homolog A (yeast)                              | 72554  | 0.36 | 0.41 | 0.62  | 0.58 | -0.38 ns |
| Farsb         | phenylalanyl-tRNA synthetase, beta subunit                                                  | 23874  | 1.80 | 2.06 | 1.76  | 1.02 | -0.23 ns |
| Atp5h         | ATP synthase, H+ transporting, mitochondrial F0 complex, subunit d                          | 71679  | 9.81 | 9.95 | 10.13 | 0.96 | -0.11 ns |
| Wdhf1         | WD repeat and HMG-box DNA binding protein 1                                                 | 218973 | 1.03 | 1.06 | 1.08  | 0.95 | -0.14 ns |
| Tsen2         | tRNA splicing endonuclease 2 homolog (SEN2, S. cerevisiae)                                  | 381802 | 0.34 | 0.45 | 0.34  | 0.99 | 0.18 ns  |
| Osgep1        | O-sialoglycoprotein endopeptidase-like 1                                                    | 72085  | 0.42 | 0.31 | 0.26  | 1.60 | 0.86 *   |
| Ptp4a2        | Protein tyrosine phosphatase 4a2                                                            | 19244  | 9.50 | 9.32 | 11.47 | 0.82 | -0.44 ns |
| Ugcg          | UDP-glucose ceramide glucosyltransferase                                                    | 22234  | 0.36 | 0.33 | 0.45  | 0.79 | -0.60 ns |
| 1200016E24Rik |                                                                                             | 319202 | 0.65 | 0.85 | 1.15  | 0.56 | -0.74 ns |
| Ide           | insulin degrading enzyme                                                                    | 15925  | 1.85 | 2.15 | 1.35  | 1.36 | 0.60 ns  |
| Sft2d2        | SFT2 domain containing 2                                                                    | 108735 | 1.37 | 1.53 | 1.20  | 1.13 | -0.07 ns |
| Pctk2         | PCTAIRE-motif protein kinase 2                                                              | 237459 | 0.39 | 0.38 | 0.24  | 1.61 | 0.19 ns  |



|               |                                                                                                |        |       |       |       |      |          |
|---------------|------------------------------------------------------------------------------------------------|--------|-------|-------|-------|------|----------|
| Plcg1         | phospholipase C, gamma 1                                                                       | 18803  | 0.71  | 0.81  | 1.00  | 0.71 | -0.70 ns |
| Rps3          | ribosomal protein S3                                                                           | 27050  | 13.96 | 14.91 | 12.89 | 1.08 | 0.14 ns  |
| Leng8         | leukocyte receptor cluster (LRC) member 8                                                      | 232798 | 0.31  | 0.24  | 0.20  | 1.51 | -0.04 ns |
| Btdb6         | BTB (POZ) domain containing 6                                                                  | 399566 | 0.49  | 0.46  | 0.45  | 1.09 | -0.19 ns |
| Cgn           | cingulin                                                                                       | 70737  | 1.63  | 1.89  | 1.22  | 1.34 | 0.45 ns  |
| BC046331      | cDNA sequence BC046331                                                                         | 230967 | 0.33  | 0.34  | 0.40  | 0.82 | -0.54 ns |
| Ahsa2         | AHA1, activator of heat shock protein ATPase homolog 2 (yeast)                                 | 268390 | 0.54  | 0.54  | 0.53  | 1.02 | -0.30 ns |
| Ranbp6        | RAN binding protein 6                                                                          | 240614 | 0.49  | 0.52  | 0.41  | 1.19 | 0.78 ns  |
| Eomes         | eomesodermin homolog (Xenopus laevis)                                                          | 13813  | 0.28  | 0.23  | 0.29  | 0.95 | 0.11 ns  |
| Ate1          | arginine-tRNA-protein transferase 1                                                            | 11907  | 0.60  | 0.53  | 0.63  | 0.96 | -0.15 ns |
| Rsbn1         | rosbin, round spermatid basic protein 1                                                        | 229675 | 0.94  | 1.08  | 1.32  | 0.70 | -0.95 ** |
| BC034090      | cDNA sequence BC034090                                                                         | 207792 | 0.45  | 0.55  | 0.22  | 1.99 | 0.49 ns  |
| Id2           | inhibitor of DNA binding 2                                                                     | 15902  | 1.97  | 3.21  | 3.09  | 0.63 | -0.26 ns |
| Lin54         | lin-54 homolog (C. elegans)                                                                    | 231506 | 0.83  | 0.89  | 1.24  | 0.66 | -0.76 ns |
| Lrrcc1        | leucine rich repeat and coiled-coil domain containing 1                                        | 71710  | 0.55  | 0.54  | 0.41  | 1.34 | 0.79 ns  |
| Vash1         | vasohibin 1                                                                                    | 238328 | 1.18  | 1.36  | 5.32  | 0.22 | -0.37 ns |
| Pou3f3        | POU domain, class 3, transcription factor 3                                                    | 18993  | 0.37  | 0.48  | 0.15  | 2.53 | 0.68 ns  |
| Man2a2        | mannosidase 2, alpha 2                                                                         | 140481 | 0.41  | 0.60  | 0.68  | 0.60 | -0.86 *  |
| Dtx3l         | deltex 3-like (Drosophila)                                                                     | 209200 | 0.38  | 0.52  | 1.04  | 0.37 | -0.78 ns |
| Cdc42se2      | CDC42 small effector 2                                                                         | 72729  | 0.94  | 1.01  | 1.20  | 0.78 | -0.97 ** |
| Foxp1         | forkhead box P1                                                                                | 108655 | 1.04  | 1.09  | 0.97  | 1.06 | -0.46 ns |
| Erlin2        | ER lipid raft associated 2                                                                     | 244373 | 1.21  | 1.36  | 1.47  | 0.82 | -0.38 ns |
| Crebbp        | CREB binding protein                                                                           | 12914  | 2.65  | 2.41  | 2.60  | 1.02 | -0.19 ns |
| Ibrdc3        | IBR domain containing 3                                                                        | 75234  | 0.30  | 0.36  | 0.52  | 0.57 | -0.45 ns |
| BC023829      | cDNA sequence BC023829                                                                         | 236848 | 0.69  | 0.56  | 0.78  | 0.88 | -0.09 ns |
| Coq4          | coenzyme Q4 homolog (yeast)                                                                    | 227683 | 0.41  | 0.35  | 0.31  | 1.35 | 0.06 ns  |
| Ncoa2         | nuclear receptor coactivator 2                                                                 | 17978  | 1.51  | 1.34  | 1.10  | 1.37 | 0.50 ns  |
| Baz2b         | bromodomain adjacent to zinc finger domain, 2B                                                 | 407823 | 0.91  | 0.77  | 0.62  | 1.47 | 0.15 ns  |
| Heatr5a       | HEAT repeat containing 5A                                                                      | 320487 | 1.29  | 1.50  | 1.16  | 1.11 | 0.46 ns  |
| Zfp746        | zinc finger protein 746                                                                        | 69228  | 0.40  | 0.35  | 0.45  | 0.90 | -0.43 ns |
| Vav2          | vav 2 oncogene                                                                                 | 22325  | 0.45  | 0.47  | 0.35  | 1.29 | 0.18 ns  |
| Btaf1         | BTA1 RNA polymerase II, B-TFIID transcription factor-associated, (Mot1 homolog, S. cerevisiae) | 107182 | 2.69  | 2.77  | 1.88  | 1.42 | 0.76 ns  |
| Ints8         | integrator complex subunit 8                                                                   | 72656  | 0.42  | 0.39  | 0.43  | 0.97 | -0.34 ns |
| Snx13         | sorting nexin 13                                                                               | 217463 | 2.10  | 1.75  | 1.83  | 1.14 | 0.00 ns  |
| Plxn1         | plexin B1                                                                                      | 235611 | 0.89  | 0.85  | 0.96  | 0.92 | -0.04 ns |
| Tmem141       | transmembrane protein 141                                                                      | 51875  | 0.31  | 0.40  | 0.27  | 1.17 | 0.05 ns  |
| A930041I02Rik | RIKEN cDNA A930041I02 gene                                                                     | 320271 | 0.63  | 0.52  | 0.38  | 1.64 | 0.30 ns  |
| Itpkb         | inositol 1,4,5-trisphosphate 3-kinase B                                                        | 320404 | 0.35  | 0.29  | 0.18  | 1.91 | 0.14 ns  |
| Lem3          | LEM domain containing 3                                                                        | 380664 | 0.87  | 0.87  | 0.82  | 1.06 | -0.27 ns |
| Tbc1d4        | TBC1 domain family, member 4                                                                   | 210789 | 1.53  | 0.96  | 0.83  | 1.82 | 0.27 ns  |
| Taf4b         | TAF4B RNA polymerase II, TATA box binding protein (TBP)-associated factor                      | 72504  | 0.23  | 0.33  | 0.23  | 1.00 | 0.36 ns  |
| Kif11         | kinesin family member 11                                                                       | 16551  | 1.83  | 1.99  | 1.62  | 1.13 | 0.66 ns  |
| Ihpk2         | inositol hexaphosphate kinase 2                                                                | 76500  | 0.37  | 0.42  | 0.40  | 0.91 | 0.34 ns  |
| Ankrd40       | ankyrin repeat domain 40                                                                       | 71452  | 0.85  | 0.63  | 0.76  | 1.11 | 0.54 ns  |
| Mboat1        | membrane bound O-acyltransferase domain containing 1                                           | 218121 | 1.37  | 1.22  | 1.44  | 0.95 | -0.10 ns |
| Hmgb1         | high mobility group box 1                                                                      | 15289  | 11.01 | 10.23 | 9.93  | 1.10 | 0.59 ns  |
| Usp46         | ubiquitin specific peptidase 46                                                                | 69727  | 0.51  | 0.45  | 0.46  | 1.09 | -0.17 ns |
| Cyhr1         | cysteine and histidine rich 1                                                                  | 54151  | 0.90  | 0.88  | 0.88  | 1.03 | 0.47 ns  |
| Ttc7          | tetratricopeptide repeat domain 7                                                              | 225049 | 0.39  | 0.34  | 0.36  | 1.06 | 0.09 ns  |
| Gnptab        | N-acetylglucosamine-1-phosphate transferase, alpha and beta subunits                           | 432486 | 0.39  | 0.39  | 0.27  | 1.43 | -0.06 ns |
| Celsr2        | cadherin EGF LAG seven-pass G-type receptor 2                                                  | 53883  | 1.18  | 1.35  | 1.00  | 1.18 | -0.06 ns |
| Cdk6          | cyclin-dependent kinase 6                                                                      | 12571  | 1.01  | 1.22  | 0.79  | 1.27 | 0.58 ns  |
| Kctd15        | potassium channel tetramerisation domain containing 15                                         | 233107 | 0.50  | 0.70  | 0.86  | 0.57 | -0.81 *  |
| Jmjd2a        | jumonji domain containing 2A                                                                   | 230674 | 0.38  | 0.34  | 0.43  | 0.89 | -0.41 ns |
| Ppig          | peptidyl-prolyl isomerase G (cyclophilin G)                                                    | 228005 | 1.99  | 2.07  | 1.48  | 1.33 | 0.53 ns  |
| Tfdp2         | transcription factor Dp 2                                                                      | 211586 | 0.91  | 0.71  | 0.56  | 1.62 | 0.64 ns  |
| Ccdc82        | coiled-coil domain containing 82                                                               | 66396  | 0.62  | 0.48  | 0.26  | 2.35 | 0.78 ns  |
| Nrp2          | neuropilin 2                                                                                   | 18187  | 0.51  | 0.42  | 0.37  | 1.37 | 0.21 ns  |
| Fbxo42        | F-box protein 42                                                                               | 213499 | 0.72  | 0.35  | 0.75  | 0.95 | -0.04 ns |
| D4Wsu53e      | DNA segment, Chr 4, Wayne State University 53, expressed                                       | 27981  | 0.39  | 0.40  | 0.44  | 0.88 | -0.40 ns |
| Foxj3         | forkhead box J3                                                                                | 230700 | 1.96  | 1.77  | 1.99  | 0.98 | 0.12 ns  |
| Fastkd5       | FAST kinase domains 5                                                                          | 380601 | 0.76  | 0.77  | 0.77  | 0.98 | -0.02 ns |
| 2410002O22Rik | RIKEN cDNA 2410002O22 gene                                                                     | 66975  | 0.68  | 0.83  | 0.89  | 0.76 | -0.93 ** |
| Cox10         | COX10 homolog, cytochrome c oxidase assembly protein, heme A: farnesyltransferase (yeast)      | 70383  | 0.33  | 0.35  | 0.38  | 0.86 | -0.64 ns |
| Rhoc          | ras homolog gene family, member C                                                              | 11853  | 2.58  | 2.72  | 3.02  | 0.85 | -0.25 ns |
| Atp5j2        | ATP synthase, H+ transporting, mitochondrial F0 complex, subunit f, isoform 2                  | 57423  | 8.79  | 8.66  | 7.50  | 1.17 | 0.45 ns  |
| Stxbp6        | syntaxin binding protein 6 (amisyn)                                                            | 217517 | 0.79  | 0.85  | 0.63  | 1.25 | 0.55 ns  |
| Stxbp5        | syntaxin binding protein 5 (tomosyn)                                                           | 78808  | 0.46  | 0.49  | 0.46  | 0.99 | 0.32 ns  |
| Ttc26         | tetratricopeptide repeat domain 26                                                             | 264134 | 0.31  | 0.38  | 0.27  | 1.16 | -0.04 ns |
| Cchr1         | coiled-coil alpha-helical rod protein 1                                                        | 240084 | 0.63  | 0.69  | 0.51  | 1.22 | 0.79 ns  |
| Dctn1         | dynactin 1                                                                                     | 13191  | 2.74  | 2.66  | 2.54  | 1.07 | 0.71 ns  |
| Rps27l        | ribosomal protein S27-like                                                                     | 67941  | 5.67  | 5.47  | 6.29  | 0.90 | -0.13 ns |
| Epas1         | Endothelial PAS domain protein 1                                                               | 13819  | 0.09  | 0.25  | 0.53  | 0.18 | -0.75 ns |
| Seid7         | SET domain containing (lysine methyltransferase) 7                                             | 73251  | 1.10  | 1.10  | 1.26  | 0.87 | -0.26 ns |
| Pdzd8         | PDZ domain containing 8                                                                        | 107368 | 2.04  | 1.91  | 1.06  | 1.91 | 0.88 *   |
| Wdsof1        | WD repeats and SOF domain containing 1                                                         | 223499 | 2.37  | 2.24  | 2.55  | 0.93 | 0.10 ns  |
| Atf6          | activating transcription factor 6                                                              | 226641 | 0.83  | 0.63  | 0.52  | 1.61 | 0.75 ns  |
| Chpt1         | choline phosphotransferase 1                                                                   | 212862 | 2.15  | 1.88  | 1.72  | 1.24 | -0.08 ns |
| Cpne3         | copine III                                                                                     | 70568  | 1.90  | 1.64  | 1.72  | 1.10 | -0.11 ns |
| Hel308        | helicase, mus308-like (Drosophila)                                                             | 191578 | 0.37  | 0.36  | 0.40  | 0.91 | -0.14 ns |
| Tmem20        | transmembrane protein 20                                                                       | 240660 | 1.72  | 1.63  | 1.01  | 1.70 | 0.38 ns  |
| BC006779      | cDNA sequence BC006779                                                                         | 229003 | 0.25  | 0.27  | 0.53  | 0.47 | -0.68 ns |
| Pim1          | proviral integration site 1                                                                    | 18712  | 0.75  | 0.73  | 0.57  | 1.31 | 0.43 ns  |

|                   |                                                                              |        |       |       |       |      |          |
|-------------------|------------------------------------------------------------------------------|--------|-------|-------|-------|------|----------|
| Prkg2             | protein kinase, cGMP-dependent, type II                                      | 19092  | 0.23  | 0.36  | 1.01  | 0.23 | -0.60 ns |
| Magi3             | membrane associated guanylate kinase, WW and PDZ domain containing 3         | 99470  | 1.91  | 2.16  | 1.27  | 1.50 | 0.15 ns  |
| Myo1d             | myosin ID                                                                    | 338367 | 0.44  | 0.56  | 0.51  | 0.85 | -0.32 ns |
| Kbtbd11           | kelch repeat and BTB (POZ) domain containing 11                              | 74901  | 0.19  | 0.09  | 0.53  | 0.36 | -0.52 ns |
| Kremen1           | kringle containing transmembrane protein 1                                   | 84035  | 0.38  | 0.30  | 0.45  | 0.85 | -0.54 ns |
| Taf5              | TAF5 RNA polymerase II, TATA box binding protein (TBP)-associated factor     | 226182 | 0.45  | 0.46  | 0.42  | 1.06 | 0.68 ns  |
| Lman2l            | lectin, mannose-binding 2-like                                               | 214895 | 0.89  | 0.85  | 0.86  | 1.03 | -0.34 ns |
| Braf              | Braf transforming gene                                                       | 109880 | 0.68  | 0.73  | 0.72  | 0.95 | 0.24 ns  |
| Dsp               | desmoplakin                                                                  | 109620 | 8.05  | 8.10  | 6.49  | 1.24 | 0.71 ns  |
| Adora1            | adenosine A1 receptor                                                        | 11539  | 0.44  | 0.45  | 0.30  | 1.48 | 0.32 ns  |
| 5730590G19Rik     | RIKEN cDNA 5730590G19 gene                                                   | 77011  | 0.67  | 0.71  | 0.63  | 1.07 | -0.15 ns |
| Dmwd              | dystrophia myotonica-containing WD repeat motif                              | 13401  | 0.56  | 0.51  | 0.44  | 1.28 | 0.66 ns  |
| Ralb              | v-ral simian leukemia viral oncogene homolog B (ras related)                 | 64143  | 1.52  | 1.88  | 1.68  | 0.90 | 0.05 ns  |
| Rap1b             | RAS related protein 1b                                                       | 215449 | 5.70  | 5.14  | 4.54  | 1.25 | 0.65 ns  |
| 2310016E02Rik     | RIKEN cDNA 2310016E02 gene                                                   | 67695  | 4.00  | 3.62  | 4.21  | 0.95 | -0.32 ns |
| Tor1aip2          | torsin A interacting protein 2                                               | 240832 | 1.97  | 1.66  | 1.96  | 1.00 | -0.27 ns |
| Nfic              | nuclear factor I/C                                                           | 18029  | 0.80  | 1.00  | 0.87  | 0.91 | 0.08 ns  |
| D2Bwg1335e        | DNA segment, Chr 2, Brigham & Women's Genetics 1335 expressed                | 52838  | 0.48  | 0.46  | 0.44  | 1.10 | -0.25 ns |
| OTTMUSG0000016644 |                                                                              | 667373 | 0.10  | 0.08  | 0.56  | 0.18 | -0.52 ns |
| Depdc5            | DEP domain containing 5                                                      | 277854 | 0.28  | 0.34  | 0.38  | 0.73 | -0.17 ns |
| Rsc1a1            | regulatory solute carrier protein, family 1, member 1                        | 69994  | 0.57  | 0.48  | 0.66  | 0.85 | -0.45 ns |
| 0610030E20Rik     | RIKEN cDNA 0610030E20 gene                                                   | 68364  | 0.55  | 0.59  | 0.73  | 0.76 | -0.49 ns |
| Irgq              | immunity-related GTPase family, Q                                            | 210146 | 0.34  | 0.40  | 0.42  | 0.78 | -0.89 *  |
| Cttnbp2nl         | CTTNBP2 N-terminal like                                                      | 80281  | 2.77  | 2.24  | 2.21  | 1.25 | 0.44 ns  |
| Exosc6            | exosome component 6                                                          | 72544  | 0.88  | 1.04  | 0.79  | 1.11 | 0.37 ns  |
| Trpm4             | transient receptor potential cation channel, subfamily M, member 4           | 68667  | 0.88  | 0.81  | 0.95  | 0.93 | -0.40 ns |
| Fhod3             | formin homology 2 domain containing 3                                        | 225288 | 0.63  | 0.77  | 0.38  | 1.65 | 0.53 ns  |
| Tmcc3             | transmembrane and coiled coil domains 3                                      | 319880 | 0.97  | 1.04  | 1.55  | 0.63 | -0.55 ns |
| Zfp597            | zinc finger protein 597                                                      | 71063  | 0.54  | 0.54  | 0.55  | 0.97 | 0.03 ns  |
| Erf               | Ets2 repressor factor                                                        | 13875  | 0.54  | 0.55  | 0.51  | 1.07 | 0.63 ns  |
| C230078M08Rik     | RIKEN cDNA C230078M08 gene                                                   | 319749 | 0.88  | 0.85  | 0.75  | 1.17 | 0.54 ns  |
| Kntc1             | kinetochore associated 1                                                     | 208628 | 1.15  | 1.22  | 1.74  | 0.66 | -0.33 ns |
| C230081A13Rik     | RIKEN cDNA C230081A13 gene                                                   | 244895 | 0.49  | 0.54  | 0.50  | 0.97 | 0.50 ns  |
| Pcid2             | PCI domain containing 2                                                      | 234069 | 0.44  | 0.54  | 0.61  | 0.71 | -0.48 ns |
| Ccdc85b           | coiled-coil domain containing 85B                                            | 240514 | 0.44  | 0.33  | 0.24  | 1.79 | 0.90 *   |
| Rps7              | ribosomal protein S7                                                         | 20115  | 24.32 | 24.84 | 22.79 | 1.06 | -0.06 ns |
| Atad5             | ATPase family, AAA domain containing 5                                       | 237877 | 1.14  | 1.19  | 1.04  | 1.09 | 0.35 ns  |
| Sned1             | sushi, nidogen and EGF-like domains 1                                        | 208777 | 0.50  | 0.55  | 0.17  | 2.94 | 0.08 ns  |
| LOC631806         |                                                                              | 631806 | 0.55  | 0.47  | 0.58  | 0.95 | -0.60 ns |
| Znrf3             |                                                                              | 407821 | 0.55  | 0.47  | 0.58  | 0.95 | -0.60 ns |
| Cyp20a1           | cytochrome P450, family 20, subfamily A, polypeptide 1                       | 77951  | 1.40  | 1.33  | 0.89  | 1.56 | 0.07 ns  |
| Acat2             | acetyl-Coenzyme A acetyltransferase 2                                        | 110460 | 5.86  | 4.83  | 3.93  | 1.48 | 0.97 **  |
| Pcmd1             | protein-L-isoaspartate (D-aspartate) O-methyltransferase domain containing 1 | 319263 | 0.66  | 0.60  | 0.36  | 1.83 | 0.39 ns  |
| Gsk3a             | glycogen synthase kinase 3 alpha                                             | 606496 | 0.81  | 0.89  | 0.91  | 0.88 | 0.12 ns  |
| Ubb               |                                                                              | 22187  | 24.32 | 21.26 | 20.78 | 1.16 | 0.49 ns  |
| Gnai2             | guanine nucleotide binding protein, alpha inhibiting 2                       | 14678  | 4.03  | 4.33  | 4.18  | 0.96 | 0.47 ns  |
| Als2cr4           | amyotrophic lateral sclerosis 2 (juvenile) chromosome region, candidate 4    | 381259 | 0.66  | 0.68  | 0.59  | 1.12 | 0.39 ns  |
| Zfp397            | zinc finger protein 397                                                      | 69256  | 0.32  | 0.33  | 0.32  | 0.98 | 0.11 ns  |
| Mast3             | microtubule associated serine/threonine kinase 3                             | 546071 | 0.52  | 0.59  | 0.53  | 0.98 | -0.03 ns |
| Rhobtb2           | Rho-related BTB domain containing 2                                          | 246710 | 0.26  | 0.30  | 0.36  | 0.72 | -0.40 ns |
| Tbc1d12           | TBC1D12: TBC1 domain family, member 12                                       | 209478 | 0.49  | 0.62  | 0.63  | 0.78 | 0.00 ns  |
| Cep164            | centrosomal protein 164                                                      | 214552 | 0.53  | 0.57  | 0.57  | 0.93 | -0.05 ns |
| Lars2             | leucyl-tRNA synthetase, mitochondrial                                        | 102436 | 0.56  | 0.62  | 0.44  | 1.25 | 0.73 ns  |
| 2310008H09Rik     | RIKEN cDNA 2310008H09 gene                                                   | 66356  | 0.42  | 0.48  | 0.48  | 0.87 | -0.53 ns |
| 4921505C17Rik     | RIKEN cDNA 4921505C17 gene                                                   | 78757  | 1.64  | 1.44  | 2.19  | 0.74 | -0.33 ns |
| EG545124          |                                                                              | 545124 | 3.76  | 3.55  | 3.35  | 1.12 | 0.05 ns  |
| LOC624784         |                                                                              | 624784 | 3.76  | 3.55  | 3.35  | 1.12 | 0.05 ns  |
| Tdg               |                                                                              | 21665  | 3.76  | 3.55  | 3.35  | 1.12 | 0.05 ns  |
| Snrpn             | small nuclear ribonucleoprotein N                                            | 20646  | 0.44  | 0.25  | 0.21  | 2.12 | 0.30 ns  |
| EG241053          |                                                                              | 241053 | 27.00 | 24.48 | 18.04 | 1.49 | 0.71 ns  |
| EG622589          |                                                                              | 622589 | 27.00 | 24.48 | 18.04 | 1.49 | 0.71 ns  |
| EG633570          |                                                                              | 633570 | 27.00 | 24.48 | 18.04 | 1.49 | 0.71 ns  |
| LOC546695         |                                                                              | 546695 | 27.00 | 24.48 | 18.04 | 1.49 | 0.71 ns  |
| LOC630855         |                                                                              | 630855 | 27.00 | 24.48 | 18.04 | 1.49 | 0.71 ns  |
| LOC639477         |                                                                              | 639477 | 27.00 | 24.48 | 18.04 | 1.49 | 0.71 ns  |
| LOC668706         |                                                                              | 668706 | 27.00 | 24.48 | 18.04 | 1.49 | 0.71 ns  |
| Rpl12             |                                                                              | 269261 | 27.00 | 24.48 | 18.04 | 1.49 | 0.71 ns  |
| Lima1             | LIM domain and actin binding 1                                               | 65970  | 1.67  | 1.60  | 1.30  | 1.28 | -0.22 ns |
| Atp6v0c           | ATPase, H+ transporting, lysosomal V0 subunit C                              | 11984  | 9.38  | 8.80  | 10.50 | 0.89 | -0.71 ns |
| Dus1l             | dihydrouridine synthase 1-like (S. cerevisiae)                               | 68730  | 0.90  | 0.94  | 0.88  | 1.01 | 0.57 ns  |
| Nde1              | nuclear distribution gene E homolog 1 (A nidulans)                           | 67203  | 1.02  | 1.15  | 1.16  | 0.88 | 0.29 ns  |
| Smek1             | SMEK homolog 1, suppressor of mek1 (Dictyostelium)                           | 68734  | 1.98  | 1.68  | 1.92  | 1.03 | 0.22 ns  |
| 6720401G13Rik     | RIKEN cDNA 6720401G13 gene                                                   | 103012 | 0.40  | 0.39  | 0.41  | 0.96 | -0.10 ns |
| 5031439G07Rik     | RIKEN cDNA 5031439G07 gene                                                   | 223739 | 0.77  | 0.93  | 1.00  | 0.76 | -0.39 ns |
| Zyg11b            | zyg-II homolog B (C. elegans)                                                | 414872 | 0.53  | 0.62  | 0.65  | 0.81 | -0.85 *  |
| Samd10            | sterile alpha motif domain containing 10                                     | 229011 | 0.28  | 0.31  | 0.34  | 0.81 | -0.83 *  |
| Pacs1             | phosphofurin acidic cluster sorting protein 1                                | 107975 | 0.53  | 0.59  | 0.48  | 1.10 | 0.11 ns  |
| Tbc1d16           | TBC1 domain family, member 16                                                | 207592 | 0.87  | 0.73  | 0.49  | 1.75 | -0.21 ns |
| Gemin7            | gem (nuclear organelle) associated protein 7                                 | 69731  | 0.49  | 0.49  | 0.44  | 1.11 | 0.75 ns  |
| Arid4b            | AT rich interactive domain 4B (Rbp1 like)                                    | 94246  | 1.70  | 1.59  | 1.71  | 0.99 | -0.41 ns |
| Akap9             | A kinase (PRKA) anchor protein (yotiao) 9                                    | 100986 | 1.38  | 1.27  | 1.38  | 1.00 | -0.38 ns |
| 4930547N16Rik     | RIKEN cDNA 4930547N16 gene                                                   | 75317  | 0.33  | 0.35  | 0.37  | 0.89 | 0.03 ns  |

|               |                                                                   |        |       |       |       |      |          |
|---------------|-------------------------------------------------------------------|--------|-------|-------|-------|------|----------|
| Ankrd11       | ankyrin repeat domain 11                                          | 77087  | 1.81  | 1.85  | 1.33  | 1.35 | 0.69 ns  |
| Cep110        | centrosomal protein 110                                           | 26920  | 0.36  | 0.43  | 0.32  | 1.12 | -0.04 ns |
| Atg9a         | autophagy-related 9A (yeast)                                      | 245860 | 0.47  | 0.43  | 0.43  | 1.07 | 0.26 ns  |
| Klhl12        | kelch-like 12 (Drosophila)                                        | 240756 | 0.70  | 0.64  | 0.58  | 1.20 | 0.88 *   |
| Ppm1l         | protein phosphatase 1 (formerly 2C)-like                          | 242083 | 0.62  | 0.33  | 0.14  | 4.51 | 0.88 *   |
| Rpl17         | ribosomal protein L17                                             | 319195 | 17.48 | 19.02 | 14.78 | 1.18 | 0.70 ns  |
| Sfrs14        | splicing factor, arginine/serine-rich 14                          | 234373 | 0.22  | 0.34  | 0.40  | 0.56 | -0.66 ns |
| Csda          | cold shock domain protein A                                       | 56449  | 10.31 | 9.35  | 11.02 | 0.93 | -0.53 ns |
| Eif4e2        | eukaryotic translation initiation factor 4E member 2              | 26987  | 1.82  | 1.89  | 1.72  | 1.05 | -0.38 ns |
| 5730455O13Rik | RIKEN cDNA 5730455O13 gene                                        | 70567  | 0.59  | 0.67  | 0.37  | 1.57 | 0.75 ns  |
| Unc50         | unc-50 homolog (C. elegans)                                       | 67387  | 0.92  | 1.38  | 1.01  | 0.91 | -0.06 ns |
| LOC675985     |                                                                   | 675985 | 3.04  | 2.97  | 3.34  | 0.91 | -0.59 ns |
| Suclg2        | succinate-Coenzyme A ligase, GDP-forming, beta subunit            | 20917  | 2.17  | 1.98  | 1.74  | 1.24 | -0.06 ns |
| Cdc42bpa      | Cdc42 binding protein kinase alpha                                | 226751 | 0.63  | 0.60  | 0.48  | 1.31 | 0.38 ns  |
| Psmc2         | proteasome (prosome, macropain) 26S subunit, ATPase 2             | 19181  | 4.77  | 5.03  | 5.43  | 0.87 | -0.54 ns |
| Commd6        | COMM domain containing 6                                          | 66200  | 0.46  | 0.52  | 0.79  | 0.58 | -0.77 ns |
| 1810063B05Rik | RIKEN cDNA 1810063B05 gene                                        | 67892  | 1.26  | 1.07  | 0.61  | 2.07 | 0.87 *   |
| Hist3h2a      | histone cluster 3, H2a                                            | 319162 | 0.42  | 0.34  | 0.24  | 1.76 | 0.97 **  |
| Ap2a2         | adaptor protein complex AP-2, alpha 2 subunit                     | 11772  | 0.89  | 1.02  | 1.17  | 0.75 | -0.50 ns |
| Sycp3         | Synaptonemal complex protein 3                                    | 20962  | 1.70  | 1.48  | 1.13  | 1.50 | 0.29 ns  |
| Zfp526        |                                                                   | 210172 | 17.51 | 18.10 | 15.47 | 1.13 | 0.15 ns  |
| Prkab2        | protein kinase, AMP-activated, beta 2 non-catalytic subunit       | 108097 | 0.49  | 0.45  | 0.36  | 1.34 | 0.51 ns  |
| Prkab2        | protein kinase, AMP-activated, beta 2 non-catalytic subunit       | 108097 | 0.46  | 0.56  | 0.46  | 0.98 | 0.01 ns  |
| Stk38l        | serine/threonine kinase 38 like                                   | 232533 | 0.43  | 0.42  | 0.58  | 0.73 | -0.51 ns |
| Akt3          | thymoma viral proto-oncogene 3                                    | 23797  | 0.72  | 0.68  | 0.66  | 1.09 | 0.71 ns  |
| Ankrd50       | ankrin repeat domain 50                                           | 99696  | 0.86  | 1.04  | 1.02  | 0.84 | -0.38 ns |
| Itns1         | intersectin 1 (SH3 domain protein 1A)                             | 16443  | 0.39  | 0.35  | 0.29  | 1.35 | 0.73 ns  |
| Dnajb12       | DnaJ (Hsp40) homolog, subfamily B, member 12                      | 56709  | 0.36  | 0.31  | 0.31  | 1.16 | 0.35 ns  |
| Rpl32         | ribosomal protein L32                                             | 19951  | 16.63 | 16.79 | 15.50 | 1.07 | 0.49 ns  |
| Gdi2          | guanosine diphosphate (GDP) dissociation inhibitor 2              | 14569  | 9.78  | 8.90  | 9.22  | 1.06 | 0.52 ns  |
| Zbtb43        | zinc finger and BTB domain containing 43                          | 71834  | 0.74  | 0.62  | 0.65  | 1.14 | 0.00 ns  |
| Usp40         | ubiquitin specific peptidase 40                                   | 227334 | 0.47  | 0.46  | 0.36  | 1.28 | 0.29 ns  |
| Nudt18        | nudix (nucleoside diphosphate linked moiety X)-type motif 18      | 213484 | 0.38  | 0.43  | 0.71  | 0.54 | -0.63 ns |
| Ubxtd7        | UBX domain containing 7                                           | 224111 | 0.48  | 0.49  | 0.71  | 0.68 | -0.42 ns |
| Fbxl19        | F-box and leucine-rich repeat protein 19                          | 233902 | 0.31  | 0.45  | 0.33  | 0.95 | 0.05 ns  |
| Dennd3        | DENN/MADD domain containing 3                                     | 105841 | 0.56  | 0.51  | 0.48  | 1.18 | 0.80 ns  |
| E130308A19Rik | RIKEN cDNA E130308A19 gene                                        | 230259 | 0.33  | 0.38  | 0.39  | 0.83 | -0.78 ns |
| Ckap2l        | cytoskeleton associated protein 2-like                            | 70466  | 1.24  | 1.40  | 1.71  | 0.72 | -0.27 ns |
| Hr            | hairless                                                          | 15460  | 0.38  | 0.33  | 0.50  | 0.77 | 0.28 ns  |
| Taok3         | TAO kinase 3                                                      | 330177 | 0.45  | 0.60  | 0.60  | 0.75 | -0.69 ns |
| Cnot3         | CCR4-NOT transcription complex, subunit 3                         | 232791 | 0.79  | 0.83  | 1.00  | 0.78 | -0.88 *  |
| Hibadh        | 3-hydroxyisobutyrate dehydrogenase                                | 58875  | 2.29  | 2.19  | 2.96  | 0.77 | -0.69 ns |
| Btdb12        | BTB (POZ) domain containing 12                                    | 52864  | 0.38  | 0.33  | 0.53  | 0.70 | -0.59 ns |
| Nlk           | nemo like kinase                                                  | 18099  | 1.27  | 1.19  | 0.95  | 1.33 | 0.32 ns  |
| Nav2          | neuron navigator 2                                                | 78286  | 1.15  | 0.69  | 0.76  | 1.50 | 0.78 ns  |
| Farp2         | FERM, RhoGEF and pleckstrin domain protein 2                      | 227377 | 0.78  | 0.79  | 0.55  | 1.41 | -0.08 ns |
| Ik            | IK cytokine                                                       | 24010  | 1.87  | 2.80  | 2.34  | 0.79 | 0.06 ns  |
| Mrpl22        | mitochondrial ribosomal protein L22                               | 216767 | 1.45  | 1.48  | 1.58  | 0.91 | -0.31 ns |
| Thumpd1       | THUMP domain containing 1                                         | 233802 | 0.64  | 0.69  | 0.81  | 0.78 | -0.45 ns |
| Stk4          | serine/threonine kinase 4                                         | 58231  | 3.16  | 2.74  | 3.15  | 1.00 | -0.32 ns |
| Trappc1       | trafficking protein particle complex 1                            | 245828 | 1.32  | 1.33  | 1.91  | 0.69 | -0.64 ns |
| Zfp703        | zinc finger protein 703                                           | 353310 | 0.68  | 0.69  | 0.35  | 1.93 | 0.38 ns  |
| Bicc1         | bicaudal C homolog 1 (Drosophila)                                 | 83675  | 9.03  | 7.43  | 4.94  | 1.82 | 0.73 ns  |
| Cep68         | centrosomal protein 68                                            | 216543 | 0.78  | 0.69  | 0.79  | 0.99 | -0.43 ns |
| Pigp          | phosphatidylinositol glycan anchor biosynthesis, class P          | 56176  | 2.16  | 2.15  | 2.46  | 0.88 | -0.56 ns |
| Exoc8         | exocyst complex component 8                                       | 102058 | 0.45  | 0.48  | 0.30  | 1.49 | 0.51 ns  |
| Hes6          | hairly and enhancer of split 6 (Drosophila)                       | 55927  | 0.59  | 0.62  | 0.52  | 1.13 | -0.31 ns |
| Tbc1d22b      | TBC1 domain family, member 22B                                    | 381085 | 0.38  | 0.37  | 0.25  | 1.49 | 0.72 ns  |
| 9130227C08Rik | RIKEN cDNA 9130227C08Rik gene                                     | 219094 | 0.56  | 0.48  | 0.51  | 1.10 | 0.24 ns  |
| Kif13b        | kinesin family member 13B                                         | 16554  | 0.96  | 1.02  | 1.29  | 0.74 | -0.74 ns |
| Rfx1          | regulatory factor X, 1 (influences HLA class II expression)       | 19724  | 0.41  | 0.42  | 0.39  | 1.05 | -0.40 ns |
| Rps24         | ribosomal protein S24                                             | 20088  | 23.27 | 22.35 | 18.31 | 1.26 | 0.85 *   |
| Zbtb10        |                                                                   | 229055 | 0.19  | 0.20  | 0.52  | 0.36 | -0.76 ns |
| Ing5          | inhibitor of growth family, member 5                              | 66262  | 0.68  | 0.69  | 0.51  | 1.33 | 0.61 ns  |
| Ankrd26       | ankyrin repeat domain 26                                          | 232339 | 0.24  | 0.27  | 0.33  | 0.72 | -0.65 ns |
| A630007B06Rik |                                                                   | 213993 | 1.34  | 1.32  | 0.94  | 1.42 | 0.82 *   |
| Zfp414        | zinc finger protein 414                                           | 328801 | 0.77  | 0.56  | 0.36  | 2.12 | 0.93 **  |
| Zbtb34        | zinc finger and BTB domain containing 34                          | 241311 | 0.36  | 0.39  | 0.33  | 1.07 | -0.24 ns |
| Rnf24         | ring finger protein 24                                            | 51902  | 0.64  | 0.62  | 0.64  | 1.00 | 0.23 ns  |
| Stt13         | suppression of tumorigenicity 13                                  | 70356  | 5.38  | 4.73  | 4.47  | 1.20 | 0.41 ns  |
| Nsmc1         | non-SMC element 1 homolog (S. cerevisiae)                         | 67711  | 0.95  | 1.17  | 1.30  | 0.73 | -0.59 ns |
| Slc6a17       | solute carrier family 6 (neurotransmitter transporter), member 17 | 229706 | 0.70  | 1.07  | 0.41  | 1.70 | 0.50 ns  |
| Hbxip         | hepatitis B virus x interacting protein                           | 68576  | 3.13  | 4.08  | 3.69  | 0.84 | -0.42 ns |
| Zmynd11       | zinc finger, MYND domain containing 11                            | 66505  | 1.52  | 1.68  | 2.14  | 0.70 | -0.70 ns |
| Ccar1         | cell division cycle and apoptosis regulator 1                     | 67500  | 1.77  | 1.97  | 1.54  | 1.14 | 0.23 ns  |
| Eif4ebp2      | eukaryotic translation initiation factor 4E binding protein 2     | 13688  | 1.16  | 1.00  | 1.01  | 1.14 | 0.19 ns  |
| Usp32         | ubiquitin specific peptidase 32                                   | 237898 | 2.84  | 2.48  | 2.58  | 1.10 | 0.44 ns  |
| Kcnj16        | potassium inwardly-rectifying channel, subfamily J, member 16     | 16517  | 0.09  | 0.18  | 0.20  | 0.45 | -0.70 ns |
| Slc30a1       | solute carrier family 30 (zinc transporter), member 1             | 22782  | 0.23  | 0.36  | 0.22  | 1.06 | -0.30 ns |
| Atad2         | ATPase family, AAA domain containing 2                            | 70472  | 5.15  | 4.71  | 6.34  | 0.81 | -0.12 ns |
| Leprel1       | leprecan-like 1                                                   | 210530 | 1.31  | 0.93  | 1.04  | 1.25 | 0.29 ns  |
| Dnajc5        | DnaJ (Hsp40) homolog, subfamily C, member 5                       | 13002  | 1.64  | 1.75  | 1.63  | 1.00 | -0.37 ns |
| Ddef2         | development and differentiation enhancing factor 2                | 211914 | 1.10  | 1.12  | 1.15  | 0.96 | -0.42 ns |
| Znf512b       | zinc finger protein 512B                                          | 269401 | 0.37  | 0.35  | 0.37  | 1.01 | -0.38 ns |
| E2f8          | E2F transcription factor 8                                        | 108961 | 1.18  | 1.26  | 1.60  | 0.74 | -0.44 ns |
| Arid4a        | AT rich interactive domain 4A (Rbp1 like)                         | 238247 | 0.41  | 0.52  | 0.50  | 0.81 | -0.55 ns |
| BC046404      | cDNA sequence BC046404                                            | 192976 | 0.60  | 0.52  | 0.77  | 0.78 | -0.02 ns |

|               |                                                                                               |        |       |       |       |      |          |
|---------------|-----------------------------------------------------------------------------------------------|--------|-------|-------|-------|------|----------|
| Cdc42bpg      | CDC42 binding protein kinase gamma (DMPK-like)                                                | 240505 | 1.35  | 1.19  | 1.14  | 1.18 | 0.54 ns  |
| Trim14        | tripartite motif-containing 14                                                                | 74735  | 0.19  | 0.17  | 0.38  | 0.51 | -0.45 ns |
| lpmk          | inositol polyphosphate multikinase                                                            | 69718  | 0.74  | 0.82  | 0.79  | 0.94 | -0.61 ns |
| 2610204M08Rik | RIKEN cDNA 2610204M08 gene                                                                    | 70435  | 1.00  | 1.29  | 1.40  | 0.71 | -0.47 ns |
| Gabpb1        | GA repeat binding protein, beta 1                                                             | 14391  | 0.64  | 0.52  | 0.57  | 1.12 | 0.22 ns  |
| 4732471D19Rik | RIKEN cDNA 4732471D19 gene                                                                    | 319719 | 0.30  | 0.30  | 0.31  | 0.98 | -0.57 ns |
| Sost          | sclerostin                                                                                    | 74499  | 1.56  | 1.39  | 1.24  | 1.25 | 0.87 *   |
| EG626571      |                                                                                               | 626571 | 0.28  | 0.31  | 0.32  | 0.86 | -0.70 ns |
| LOC630700     |                                                                                               | 630700 | 0.28  | 0.31  | 0.32  | 0.86 | -0.70 ns |
| Oaz1          | ornithine decarboxylase antizyme                                                              | 18245  | 11.60 | 10.65 | 10.34 | 1.12 | 0.17 ns  |
| Gls           | glutaminase                                                                                   | 14660  | 2.52  | 2.63  | 1.99  | 1.26 | 0.24 ns  |
| Ripk5         | receptor interacting protein kinase 5                                                         | 213452 | 0.34  | 0.40  | 0.39  | 0.86 | -0.63 ns |
| Slc10a7       | solute carrier family 10 (sodium/bile acid cotransporter family), member 7                    | 76775  | 0.49  | 0.56  | 0.52  | 0.93 | 0.14 ns  |
| Mlt4          | myeloid/lymphoid or mixed lineage-leukemia translocation to 4 homolog (Drosophila)            | 17356  | 4.91  | 3.98  | 2.59  | 1.89 | 0.79 ns  |
| Zfp292        | zinc finger protein 292                                                                       | 30046  | 0.79  | 0.81  | 0.98  | 0.80 | -0.52 ns |
| Gemin5        | gem (nuclear organelle) associated protein 5                                                  | 216766 | 0.39  | 0.43  | 0.48  | 0.82 | -0.68 ns |
| Scyl2         | SCY1-like 2 (S. cerevisiae)                                                                   | 213326 | 0.31  | 0.34  | 0.30  | 1.03 | 0.08 ns  |
| Myst3         | MYST histone acetyltransferase (monocytic leukemia) 3                                         | 244349 | 1.47  | 1.77  | 1.75  | 0.83 | -0.26 ns |
| D230012E17Rik | RIKEN cDNA D230012E17 gene                                                                    | 241062 | 1.91  | 2.05  | 1.32  | 1.44 | 0.52 ns  |
| B3gnt7        | UDP-GlcNAc:betaGal beta-1,3-N-acetylglucosaminyltransferase 7                                 | 227327 | 0.28  | 0.33  | 0.15  | 1.89 | 0.68 ns  |
| Pthr1         | peptidyl-tRNA hydrolase 1 homolog (S. cerevisiae)                                             | 329384 | 0.25  | 0.40  | 0.33  | 0.73 | -0.45 ns |
| Hmbox1        | homeobox containing 1                                                                         | 219150 | 0.75  | 0.72  | 0.48  | 1.57 | 0.67 ns  |
| 5830404H04Rik | RIKEN cDNA 5830404H04 gene                                                                    | 207781 | 0.29  | 0.29  | 0.31  | 0.94 | 0.26 ns  |
| 5730559C18Rik | RIKEN cDNA 5730559C18 gene                                                                    | 67313  | 0.66  | 0.71  | 0.74  | 0.89 | -0.83 *  |
| 2700094K13Rik | RIKEN cDNA 2700094K13 gene                                                                    | 72657  | 5.15  | 3.97  | 4.00  | 1.28 | 0.60 ns  |
| Dzip1l        | DAZ interacting protein 1-like                                                                | 72507  | 0.37  | 0.42  | 0.32  | 1.15 | 0.68 ns  |
| Nfix          | nuclear factor I/X                                                                            | 18032  | 0.70  | 0.58  | 0.72  | 0.97 | 0.38 ns  |
| Srbd1         | S1 RNA binding domain 1                                                                       | 78586  | 0.84  | 0.82  | 0.52  | 1.60 | 0.93 **  |
| Gpr137        | G protein-coupled receptor 137                                                                | 107173 | 0.52  | 0.53  | 0.35  | 1.48 | 0.76 ns  |
| 3830406C13Rik | RIKEN cDNA 3830406C13 gene                                                                    | 218734 | 0.37  | 0.22  | 0.28  | 1.31 | -0.27 ns |
| Clcc1         | chloride channel CLIC-like 1                                                                  | 229725 | 0.59  | 0.79  | 0.89  | 0.65 | -0.90 *  |
| Ipo4          | importin 4                                                                                    | 75751  | 1.42  | 1.54  | 1.39  | 1.01 | -0.39 ns |
| Kdelc1        | KDEL (Lys-Asp-Glu-Leu) containing 1                                                           | 72050  | 1.45  | 1.62  | 1.11  | 1.30 | 0.39 ns  |
| Ptgs1         | prostaglandin-endoperoxide synthase 1                                                         | 19224  | 0.89  | 1.08  | 1.25  | 0.71 | -0.54 ns |
| Fen1          | flap structure specific endonuclease 1                                                        | 14156  | 2.99  | 3.60  | 2.92  | 1.02 | 0.50 ns  |
| Gpr161        | G protein-coupled receptor 161                                                                | 240888 | 0.38  | 0.54  | 0.30  | 1.26 | -0.03 ns |
| Slfn9         | schlafen 9                                                                                    | 237886 | 0.47  | 0.53  | 0.73  | 0.64 | -0.25 ns |
| Dpp7          | dipeptidylpeptidase 7                                                                         | 83768  | 0.37  | 0.41  | 0.36  | 1.03 | -0.01 ns |
| Trmt1         | TRM1 tRNA methyltransferase 1 homolog (S. cerevisiae)                                         | 212528 | 0.73  | 0.77  | 0.93  | 0.78 | -0.47 ns |
| Arih1         | ariadne ubiquitin-conjugating enzyme E2 binding protein homolog 1 (Drosophila)                | 23806  | 1.33  | 0.99  | 0.98  | 1.34 | 0.72 ns  |
| Sgms1         | sphingomyelin synthase 1                                                                      | 208449 | 1.93  | 2.49  | 0.99  | 1.93 | 0.64 ns  |
| Irak2         | interleukin-1 receptor-associated kinase 2                                                    | 108960 | 0.26  | 0.34  | 0.34  | 0.77 | -0.77 ns |
| 2410014A08Rik | RIKEN cDNA 2410014A08 gene                                                                    | 109154 | 0.34  | 0.34  | 0.35  | 0.97 | -0.28 ns |
| Lrrfp2        | leucine rich repeat (in FLLI) interacting protein 2                                           | 71268  | 0.95  | 1.18  | 1.25  | 0.76 | -0.09 ns |
| BC031781      | cDNA sequence BC031781                                                                        | 208768 | 0.95  | 0.90  | 0.66  | 1.44 | 0.65 ns  |
| Map3k3        | mitogen activated protein kinase kinase kinase 3                                              | 26406  | 0.61  | 0.67  | 0.71  | 0.85 | 0.04 ns  |
| 1810022K09Rik | RIKEN cDNA 1810022K09 gene                                                                    | 69126  | 3.20  | 3.09  | 3.03  | 1.05 | -0.27 ns |
| Trove2        | TROVE domain family, member 2                                                                 | 20822  | 1.49  | 1.32  | 1.01  | 1.47 | 0.39 ns  |
| Zfp629        | zinc finger protein 629                                                                       | 320683 | 0.40  | 0.38  | 0.39  | 1.03 | 0.33 ns  |
| Ankrd37       | ankyrin repeat domain 37                                                                      | 654824 | 0.42  | 0.36  | 0.80  | 0.52 | -0.52 ns |
| Ptger1        | Prostaglandin E receptor 1 (subtype EP1)                                                      | 19216  | 0.40  | 0.49  | 0.36  | 1.11 | 0.32 ns  |
| Dtx4          | deltex 4 homolog (Drosophila)                                                                 | 207521 | 1.50  | 1.47  | 0.96  | 1.56 | 0.18 ns  |
| Tmem139       | transmembrane protein 139                                                                     | 109218 | 0.32  | 0.36  | 0.41  | 0.76 | -0.61 ns |
| Psm10         | proteasome (prosome, macropain) 26S subunit, non-ATPase, 10                                   | 53380  | 0.46  | 0.48  | 0.93  | 0.49 | -0.45 ns |
| Ddx58         | DEAD (Asp-Glu-Ala-Asp) box polypeptide 58                                                     | 230073 | 0.29  | 0.27  | 0.84  | 0.34 | -0.78 ns |
| Ccdc45        | coiled-coil domain containing 45                                                              | 320162 | 0.50  | 0.42  | 0.39  | 1.28 | 0.76 ns  |
| Spry2         | sprouty homolog 2 (Drosophila)                                                                | 24064  | 0.81  | 0.75  | 0.68  | 1.18 | 0.91 *   |
| BC023744      | cDNA sequence BC023744                                                                        | 231668 | 1.24  | 1.25  | 0.90  | 1.38 | 0.36 ns  |
| Lrpap1        | low density lipoprotein receptor-related protein associated protein 1                         | 16976  | 1.61  | 1.61  | 1.42  | 1.13 | 0.77 ns  |
| Cetn4         | centrin 4                                                                                     | 207175 | 0.27  | 0.46  | 0.23  | 1.17 | 0.05 ns  |
| Agpat4        | 1-acylglycerol-3-phosphate O-acyltransferase 4 (lysophosphatidic acid acyltransferase, delta) | 68262  | 2.02  | 1.79  | 1.01  | 1.98 | 0.69 ns  |
| Cnot4         | CCR4-NOT transcription complex, subunit 4                                                     | 53621  | 0.73  | 0.95  | 1.04  | 0.70 | -0.76 ns |
| Ltbp4         | latent transforming growth factor beta binding protein 4                                      | 108075 | 0.23  | 0.27  | 0.17  | 1.34 | 0.60 ns  |
| Rio2          | RIO kinase 2 (yeast)                                                                          | 67045  | 0.36  | 0.65  | 0.31  | 1.14 | 0.21 ns  |
| Aldh9a1       | aldehyde dehydrogenase 9, subfamily A1                                                        | 56752  | 1.81  | 1.84  | 1.60  | 1.12 | -0.05 ns |
| Prdx1         | peroxiredoxin 1                                                                               | 18477  | 14.04 | 14.10 | 13.60 | 1.03 | 0.42 ns  |
| Slc35e4       | solute carrier family 35, member E4                                                           | 103710 | 0.27  | 0.41  | 0.34  | 0.78 | -0.21 ns |
| Snapc2        | small nuclear RNA activating complex, polypeptide 2                                           | 102209 | 1.77  | 1.96  | 2.34  | 0.76 | -0.73 ns |
| Tmem32        | transmembrane protein 32                                                                      | 236792 | 1.72  | 1.57  | 2.24  | 0.77 | -0.41 ns |
| Ncaph         | non-SMC condensin I complex, subunit H                                                        | 215387 | 2.76  | 2.71  | 3.30  | 0.83 | 0.02 ns  |
| Actr5         | ARP5 actin-related protein 5 homolog (yeast)                                                  | 109275 | 0.41  | 0.39  | 0.33  | 1.24 | 0.29 ns  |
| Cdipt         | CDP-diacylglycerol--inositol 3-phosphatidyltransferase (phosphatidylinositol synthase)        | 52858  | 2.61  | 2.98  | 2.57  | 1.01 | -0.26 ns |
| Cenpi         | centromere protein I                                                                          | 102920 | 0.45  | 0.57  | 0.88  | 0.51 | -0.09 ns |
| Lgtn          | ligatin                                                                                       | 16865  | 1.29  | 1.34  | 1.17  | 1.10 | 0.19 ns  |
| Rtel1         | regulator of telomere elongation helicase 1                                                   | 269400 | 0.35  | 0.40  | 0.39  | 0.88 | -0.29 ns |
| Afap1         | actin filament associated protein 1                                                           | 70292  | 1.39  | 1.35  | 1.16  | 1.20 | -0.08 ns |
| D0H4S114      | DNA segment, human D4S114                                                                     | 27528  | 0.42  | 0.55  | 0.58  | 0.72 | -0.60 ns |
| Scyl1bp1      | SCY1-like 1 binding protein 1                                                                 | 98376  | 0.35  | 0.43  | 0.36  | 0.98 | -0.46 ns |
| Adck5         | aarF domain containing kinase 5                                                               | 268822 | 0.75  | 0.84  | 0.94  | 0.79 | -0.28 ns |
| Cox6b1        | cytochrome c oxidase, subunit VIb polypeptide 1                                               | 110323 | 9.46  | 9.01  | 10.06 | 0.94 | -0.27 ns |
| Pgd           | phosphogluconate dehydrogenase                                                                | 110208 | 3.05  | 2.67  | 3.07  | 0.99 | -0.21 ns |
| Sel1l         | sel-1 suppressor of lin-12-like (C. elegans)                                                  | 20338  | 2.06  | 2.07  | 2.15  | 0.96 | -0.50 ns |
| Ankrd17       | ankyrin repeat domain 17                                                                      | 81702  | 2.77  | 2.81  | 2.79  | 0.99 | -0.52 ns |

|               |                                                                                             |        |       |       |       |        |          |
|---------------|---------------------------------------------------------------------------------------------|--------|-------|-------|-------|--------|----------|
| 9630058J23Rik | RIKEN cDNA 9630058J23 gene                                                                  | 226744 | 0.66  | 0.63  | 0.35  | 1.85   | 0.74 ns  |
| Surf4         | surfeit gene 4                                                                              | 20932  | 1.08  | 1.11  | 0.94  | 1.14   | 0.48 ns  |
| Cdc42ep4      | CDC42 effector protein (Rho GTPase binding) 4                                               | 56699  | 0.70  | 0.74  | 0.60  | 1.15   | 0.79 ns  |
| Scyl1         | SCY1-like 1 ( <i>S. cerevisiae</i> )                                                        | 78891  | 0.78  | 0.94  | 0.78  | 1.00   | 0.06 ns  |
| Mcm5          | minichromosome maintenance deficient 5, cell division cycle 46 ( <i>S. cerevisiae</i> )     | 17218  | 7.44  | 7.71  | 8.43  | 0.88   | 0.14 ns  |
| Spin1         | spindlin 1                                                                                  | 20729  | 6.78  | 5.05  | 5.13  | 1.32   | 0.83 *   |
| Fkrp          | fukutin related protein                                                                     | 243853 | 0.28  | 0.26  | 0.50  | 0.57   | -0.69 ns |
| Khsrp         | KH-type splicing regulatory protein                                                         | 16549  | 1.74  | 1.96  | 1.27  | 1.37   | 0.48 ns  |
| Exoc5         | exocyst complex component 5                                                                 | 105504 | 1.13  | 1.03  | 0.84  | 1.33   | 0.87 *   |
| Msi2          | Musashi homolog 2 ( <i>Drosophila</i> )                                                     | 76626  | 2.19  | 1.33  | 1.40  | 1.56   | 0.19 ns  |
| EG620155      |                                                                                             | 620155 | 17.16 | 16.91 | 15.25 | 1.12   | 0.61 ns  |
| Hk1           |                                                                                             | 15275  | 17.16 | 16.91 | 15.25 | 1.12   | 0.61 ns  |
| LOC676276     |                                                                                             | 676276 | 17.16 | 16.91 | 15.25 | 1.12   | 0.61 ns  |
| EG668155      |                                                                                             | 668155 | 2.90  | 2.37  | 2.35  | 1.23   | 0.75 ns  |
| Rnf26         |                                                                                             | 213211 | 2.90  | 2.37  | 2.35  | 1.23   | 0.75 ns  |
| Tmtc3         | transmembrane and tetratricopeptide repeat containing 3                                     | 237500 | 0.90  | 0.78  | 0.63  | 1.42   | 0.65 ns  |
| Gm944         | gene model 944, (NCBI)                                                                      | 381126 | 0.99  | 0.85  | 0.50  | 1.95   | 0.44 ns  |
| Ttl1          | tubulin tyrosine ligase-like 1                                                              | 319953 | 1.40  | 1.38  | 1.50  | 0.93   | -0.58 ns |
| Mdh1          | malate dehydrogenase 1, NAD (soluble)                                                       | 17449  | 5.76  | 6.59  | 8.02  | 0.72   | -0.79 ns |
| Cnn3          | calponin 3, acidic                                                                          | 71994  | 10.57 | 11.13 | 7.23  | 1.45   | 0.42 ns  |
| B230380D07Rik | RIKEN cDNA B230380D07 gene                                                                  | 235461 | 1.19  | 1.00  | 0.92  | 1.28   | 0.94 **  |
| Cdca8         | cell division cycle associated 8                                                            | 52276  | 2.33  | 2.52  | 2.78  | 0.83   | 0.13 ns  |
| Gaa           | glucosidase, alpha, acid                                                                    | 14387  | 0.87  | 0.93  | 1.11  | 0.78   | -0.13 ns |
| Pkn1          |                                                                                             | 320795 | 0.44  | 0.37  | 0.27  | 1.61   | 0.98 *** |
| 2700007P21Rik | RIKEN cDNA 2700007P21 gene                                                                  | 212772 | 0.98  | 0.89  | 0.71  | 1.39   | 0.36 ns  |
| Senp7         | SUMO1/sentrin specific peptidase 7                                                          | 66315  | 0.95  | 0.88  | 0.91  | 1.04   | 0.12 ns  |
| Efna5         | ephrin A5                                                                                   | 13640  | 2.00  | 1.67  | 0.79  | 2.53   | 0.94 **  |
| Afap12        | actin filament associated protein 1-like 2                                                  | 226250 | 1.33  | 1.28  | 1.17  | 1.13   | 0.66 ns  |
| Slc25a5       | solute carrier family 25 (mitochondrial carrier, adenine nucleotide translocator), member 5 | 11740  | 6.63  | 7.21  | 9.72  | 0.68   | -0.68 ns |
| Mbtps2        | membrane-bound transcription factor peptidase, site 2                                       | 270669 | 0.88  | 0.99  | 1.24  | 0.71   | 0.04 ns  |
| Ewsr1         | Ewing sarcoma breakpoint region 1                                                           | 14030  | 4.28  | 4.42  | 4.93  | 0.86   | -0.10 ns |
| Cherp         | calcium homeostasis endoplasmic reticulum protein                                           | 27967  | 1.06  | 1.23  | 1.35  | 0.78   | -0.60 ns |
| Uap11         | UDP-N-acetylglucosamine pyrophosphorylase 1-like 1                                          | 227620 | 2.00  | 1.68  | 1.30  | 1.52   | 0.28 ns  |
| Leprot        | leptin receptor overlapping transcript                                                      | 230514 | 0.96  | 1.11  | 1.38  | 0.69   | -0.65 ns |
| Rnf166        | ring finger protein 166                                                                     | 68718  | 0.45  | 0.46  | 0.43  | 1.03   | -0.02 ns |
| Nav1          | neuron navigator 1                                                                          | 215690 | 0.25  | 0.32  | 0.09  | 2.78   | 0.63 ns  |
| Rasal2        | RAS protein activator like 2                                                                | 226525 | 0.34  | 0.37  | 0.19  | 1.74   | 0.47 ns  |
| Atp7a         | ATPase, Cu++ transporting, alpha polypeptide                                                | 11977  | 1.04  | 0.86  | 1.54  | 0.67   | -0.71 ns |
| EG665562      |                                                                                             | 665562 | 23.62 | 21.85 | 17.77 | 1.32   | 0.76 ns  |
| LOC638193     |                                                                                             | 638193 | 23.62 | 21.85 | 17.77 | 1.32   | 0.76 ns  |
| LOC638399     |                                                                                             | 638399 | 23.62 | 21.85 | 17.77 | 1.32   | 0.76 ns  |
| LOC665533     |                                                                                             | 665533 | 23.62 | 21.85 | 17.77 | 1.32   | 0.76 ns  |
| LOC673582     |                                                                                             | 673582 | 23.62 | 21.85 | 17.77 | 1.32   | 0.76 ns  |
| Esrrb         | estrogen related receptor, beta                                                             | 26380  | 3.69  | 3.36  | 5.43  | 0.68   | -0.65 ns |
| EG623818      |                                                                                             | 623818 | 0.49  | 0.48  | 0.70  | 0.70   | -0.26 ns |
| Clns1a        | chloride channel, nucleotide-sensitive, 1A                                                  | 12729  | 4.60  | 4.54  | 5.05  | 0.91   | -0.52 ns |
| Rbms3         | RNA binding motif, single stranded interacting protein                                      | 207181 | 2.47  | 2.23  | 0.02  | 122.81 | 0.73 ns  |
| Gm1752        | gene model 1752, (NCBI)                                                                     | 385658 | 0.38  | 0.24  | 0.33  | 1.15   | -0.08 ns |
| A930035D04Rik | RIKEN cDNA A930035D04 gene                                                                  | 320946 | 0.27  | 0.25  | 0.45  | 0.59   | -0.77 ns |
| Gng5          | guanine nucleotide binding protein (G protein), gamma 5 subunit                             | 14707  | 9.18  | 9.17  | 10.19 | 0.90   | -0.61 ns |
| Txn1          | thioredoxin-like 1                                                                          | 53382  | 4.95  | 5.70  | 6.00  | 0.82   | -0.06 ns |
| Crkl          | v-crk sarcoma virus CT10 oncogene homolog (avian)-like                                      | 12929  | 1.70  | 1.40  | 1.47  | 1.16   | 0.51 ns  |
| Txndc9        | thioredoxin domain containing 9                                                             | 98258  | 2.42  | 2.50  | 1.82  | 1.33   | 0.20 ns  |
| Tssc1         | tumor suppressing subtransferable candidate 1                                               | 380752 | 0.42  | 0.42  | 0.55  | 0.77   | -0.80 ns |
| Nelf          | nasal embryonic LHRH factor                                                                 | 56876  | 4.84  | 5.55  | 4.67  | 1.03   | 0.28 ns  |
| Brd3          | bromodomain containing 3                                                                    | 67382  | 0.92  | 0.91  | 0.71  | 1.29   | 0.32 ns  |
| Yod1          | YOD1 OTU deubiquitinating enzyme 1 homologue ( <i>S. cerevisiae</i> )                       | 226418 | 0.66  | 0.69  | 0.46  | 1.42   | 0.17 ns  |
| Rbm14         | RNA binding motif protein 14                                                                | 56275  | 3.11  | 3.11  | 2.24  | 1.38   | 0.74 ns  |
| Cnot2         | CCR4-NOT transcription complex, subunit 2                                                   | 72068  | 2.09  | 1.97  | 1.83  | 1.14   | 0.15 ns  |
| Tnrc6b        | trinucleotide repeat containing 6b                                                          | 213988 | 1.62  | 1.68  | 1.69  | 0.95   | -0.80 ns |
| Abi2          | abl-interactor 2                                                                            | 329165 | 1.23  | 1.39  | 0.69  | 1.78   | 0.69 ns  |
| Vdac1         | voltage-dependent anion channel 1                                                           | 22333  | 9.57  | 7.48  | 7.91  | 1.20   | 0.65 ns  |
| Rpl26         | ribosomal protein L26                                                                       | 19941  | 32.17 | 29.10 | 25.88 | 1.24   | 0.96 **  |
| Sh3bgrl       | SH3-binding domain glutamic acid-rich protein like                                          | 56726  | 2.32  | 2.52  | 2.50  | 0.92   | -0.39 ns |
| Rpl18         | ribosomal protein L18                                                                       | 19899  | 17.72 | 16.66 | 15.65 | 1.13   | 0.33 ns  |
| Usp39         | ubiquitin specific peptidase 39                                                             | 28035  | 1.71  | 2.23  | 2.59  | 0.65   | -0.68 ns |
| Tmem109       | transmembrane protein 109                                                                   | 68539  | 3.64  | 4.51  | 3.97  | 0.91   | -0.44 ns |
| EG637273      |                                                                                             | 637273 | 1.11  | 1.08  | 1.64  | 0.67   | -0.71 ns |
| Rap2c         | RAP2C, member of RAS oncogene family                                                        | 72065  | 0.70  | 0.74  | 1.33  | 0.52   | -0.58 ns |
| Arl13b        | ADP-ribosylation factor-like 13B                                                            | 68146  | 0.40  | 0.39  | 0.55  | 0.72   | -0.65 ns |
| D130059P03Rik | RIKEN cDNA D130059P03 gene                                                                  | 320538 | 0.86  | 1.04  | 0.89  | 0.96   | -0.01 ns |
| BC057893      | cDNA sequence BC057893                                                                      | 272027 | 0.46  | 0.52  | 0.73  | 0.62   | -0.91 *  |
| Rnps1         | ribonucleic acid binding protein S1                                                         | 19826  | 7.64  | 7.10  | 5.73  | 1.33   | 0.97 **  |
| Arnt          | aryl hydrocarbon receptor nuclear translocator                                              | 11863  | 1.26  | 1.33  | 1.23  | 1.02   | -0.36 ns |
| Mapk8         | mitogen activated protein kinase 8                                                          | 26419  | 0.85  | 0.86  | 0.71  | 1.19   | 0.18 ns  |
| Stxbp2        | syntaxin binding protein 2                                                                  | 20911  | 0.73  | 1.01  | 0.90  | 0.81   | 0.14 ns  |
| Sox21         | SRY-box containing gene 21                                                                  | 223227 | 0.16  | 0.10  | 0.26  | 0.62   | -0.71 ns |
| Osbpl8        | oxysterol binding protein-like 8                                                            | 237542 | 0.46  | 0.56  | 0.47  | 0.98   | 0.12 ns  |
| Dcun1d2       | DCN1, defective in cullin neddylation 1, domain containing 2 ( <i>S. cerevisiae</i> )       | 102323 | 0.54  | 0.45  | 0.54  | 1.00   | 0.43 ns  |
| Psm11         |                                                                                             | 69077  | 6.58  | 6.23  | 4.60  | 1.42   | 0.87 *   |
| Sdad1         | SDA1 domain containing 1                                                                    | 231452 | 0.50  | 0.56  | 0.61  | 0.81   | -0.70 ns |
| Pim3          | proviral integration site 3                                                                 | 223775 | 1.82  | 1.63  | 1.24  | 1.45   | 0.56 ns  |
| Jarid1a       | jumonji, AT rich interactive domain 1A (Rbp2 like)                                          | 214899 | 1.11  | 1.24  | 1.43  | 0.77   | -0.94 ** |
| Zc3h12c       | zinc finger CCH type containing 12C                                                         | 244871 | 0.42  | 0.34  | 0.35  | 1.20   | 0.29 ns  |
| Ern1          | Endoplasmic reticulum (ER) to nucleus signalling 1                                          | 78943  | 0.41  | 0.41  | 0.64  | 0.64   | -0.32 ns |

|               |                                                                                                                                      |        |       |       |       |       |           |
|---------------|--------------------------------------------------------------------------------------------------------------------------------------|--------|-------|-------|-------|-------|-----------|
| A630033E08Rik | RIKEN cDNA A630033E08 gene                                                                                                           | 240041 | 0.32  | 0.38  | 0.32  | 0.97  | -0.35 ns  |
| Mrp11         | mitochondrial ribosomal protein L11                                                                                                  | 66419  | 2.09  | 2.81  | 1.52  | 1.37  | 0.67 ns   |
| Nedd9         | neural precursor cell expressed, developmentally down-regulated gene 9                                                               | 18003  | 1.08  | 1.31  | 1.19  | 0.90  | -0.21 ns  |
| Akr1b3        | aldo-keto reductase family 1, member B3 (aldose reductase)                                                                           | 11677  | 2.90  | 4.19  | 3.31  | 0.87  | -0.54 ns  |
| Txndc1        | thioredoxin domain containing 1                                                                                                      | 72736  | 4.00  | 4.71  | 5.56  | 0.72  | -0.46 ns  |
| Psm6          | proteasome (prosome, macropain) subunit, alpha type 6                                                                                | 26443  | 8.64  | 10.02 | 10.61 | 0.81  | -0.54 ns  |
| Arcp2         | actin related protein 2/3 complex, subunit 2                                                                                         | 76709  | 9.54  | 9.91  | 9.18  | 1.03  | 0.53 ns   |
| Slc6a6        | solute carrier family 6 (neurotransmitter transporter, taurine), member 6                                                            | 21366  | 1.83  | 1.45  | 1.76  | 1.03  | 0.30 ns   |
| Usp22         | ubiquitin specific peptidase 22                                                                                                      | 216825 | 2.53  | 2.23  | 2.56  | 0.98  | -0.17 ns  |
| Nipbl         | Nipped-B homolog (Drosophila)                                                                                                        | 71175  | 2.09  | 2.18  | 2.21  | 0.94  | -0.36 ns  |
| Glb1          | Galactosidase, beta 1                                                                                                                | 12091  | 0.37  | 0.43  | 0.31  | 1.17  | 0.43 ns   |
| Rbpms         | RNA binding protein gene with multiple splicing                                                                                      | 19663  | 2.52  | 2.51  | 2.02  | 1.24  | 0.17 ns   |
| EG432676      |                                                                                                                                      | 432676 | 1.85  | 1.59  | 2.99  | 0.62  | -0.78 ns  |
| Pcolce        | procollagen C-endopeptidase enhancer protein                                                                                         | 18542  | 5.30  | 6.43  | 7.71  | 0.68  | -0.48 ns  |
| Hadhb         | hydroxyacyl-Coenzyme A dehydrogenase/3-ketoacyl-Coenzyme A thiolase/enoyl-Coenzyme A hydratase (trifunctional protein), beta subunit | 231086 | 1.79  | 2.13  | 2.24  | 0.80  | -0.75 ns  |
| Pdik1         | PDLIM1 interacting kinase 1 like                                                                                                     | 230809 | 1.01  | 1.14  | 1.44  | 0.70  | -0.61 ns  |
| 6530403A03Rik | RIKEN cDNA 6530403A03 gene                                                                                                           | 67797  | 0.88  | 0.82  | 0.95  | 0.93  | -0.22 ns  |
| Tmsb10        | thymosin, beta 10                                                                                                                    | 19240  | 24.98 | 22.79 | 21.51 | 1.16  | 0.93 **   |
| E2f7          | E2F transcription factor 7                                                                                                           | 52679  | 1.26  | 1.22  | 1.31  | 0.96  | 0.22 ns   |
| Styk1         | serine/threonine/tyrosine kinase 1                                                                                                   | 243659 | 0.55  | 0.64  | 0.60  | 0.92  | -0.43 ns  |
| Snrpb         | small nuclear ribonucleoprotein B                                                                                                    | 20638  | 4.78  | 5.37  | 5.84  | 0.82  | -0.46 ns  |
| Rps16         | ribosomal protein S16                                                                                                                | 20055  | 23.56 | 21.87 | 20.76 | 1.13  | 0.78 ns   |
| Sorbs2        | sorbin and SH3 domain containing 2                                                                                                   | 234214 | 2.30  | 2.13  | 1.84  | 1.24  | 0.27 ns   |
| Lig3          | ligase III, DNA, ATP-dependent                                                                                                       | 16882  | 0.41  | 0.34  | 0.50  | 0.83  | -0.41 ns  |
| Dusp5         | dual specificity phosphatase 5                                                                                                       | 240672 | 0.23  | 0.42  | 0.35  | 0.67  | 0.10 ns   |
| Fcho2         | FCH domain only 2                                                                                                                    | 218503 | 1.22  | 1.66  | 2.12  | 0.58  | -0.99 *** |
| Mysm1         | myb-like, SWIRM and MPN domains 1                                                                                                    | 320713 | 0.35  | 0.39  | 0.33  | 1.05  | 0.47 ns   |
| Sept10        | septin 10                                                                                                                            | 103080 | 0.95  | 0.96  | 0.65  | 1.46  | 0.74 ns   |
| Brd2          | bromodomain containing 2                                                                                                             | 14312  | 3.49  | 3.52  | 1.73  | 2.01  | 0.86 *    |
| Xbp1          | X-box binding protein 1                                                                                                              | 22433  | 3.60  | 3.81  | 3.33  | 1.08  | -0.39 ns  |
| Marcks1       | MARCKS-like 1                                                                                                                        | 17357  | 4.41  | 4.36  | 5.18  | 0.85  | -0.58 ns  |
| Prmt2         | protein arginine N-methyltransferase 2                                                                                               | 15468  | 1.67  | 1.62  | 1.12  | 1.49  | 0.45 ns   |
| Zfp110        | zinc finger protein 110                                                                                                              | 65020  | 0.34  | 0.46  | 0.70  | 0.48  | -0.61 ns  |
| Nmd3          | NMD3 homolog (S. cerevisiae)                                                                                                         | 97112  | 1.45  | 1.62  | 1.14  | 1.27  | 0.57 ns   |
| Phc2          | polyhomeotic-like 2 (Drosophila)                                                                                                     | 54383  | 1.73  | 1.86  | 2.28  | 0.75  | -0.56 ns  |
| Klf11         | Kruppel-like factor 11                                                                                                               | 194655 | 1.22  | 1.14  | 1.58  | 0.77  | -0.29 ns  |
| Tll12         | tubulin tyrosine ligase-like family, member 12                                                                                       | 223723 | 0.68  | 0.70  | 0.66  | 1.02  | 0.42 ns   |
| Fosl2         |                                                                                                                                      | 14284  | 0.72  | 1.15  | 1.24  | 0.58  | -0.92 *   |
| LOC634417     |                                                                                                                                      | 634417 | 0.72  | 1.15  | 1.24  | 0.58  | -0.92 *   |
| Cdca2         | cell division cycle associated 2                                                                                                     | 108912 | 0.64  | 0.72  | 0.96  | 0.67  | -0.49 ns  |
| Ccl1          | cardiotrophin-like cytokine factor 1                                                                                                 | 56708  | 0.48  | 0.62  | 0.45  | 1.06  | 0.23 ns   |
| Sdc1          | syndecan 1                                                                                                                           | 20969  | 5.60  | 7.34  | 9.25  | 0.60  | -0.75 ns  |
| Serp11        | Serpine 1 mRNA binding protein 1                                                                                                     | 66870  | 14.76 | 14.99 | 16.11 | 0.91  | -0.91 *   |
| Xab2          | XPA binding protein 2                                                                                                                | 67439  | 0.87  | 1.14  | 1.10  | 0.79  | -0.21 ns  |
| Tnpo2         | transportin 2 (importin 3, karyopherin beta 2b)                                                                                      | 212999 | 0.83  | 0.78  | 0.81  | 1.02  | 0.52 ns   |
| Fzd1          | frizzled homolog 1 (Drosophila)                                                                                                      | 14362  | 0.87  | 0.60  | 0.42  | 2.05  | 0.16 ns   |
| 1110020G09Rik | RIKEN cDNA 1110020G09 gene                                                                                                           | 68646  | 1.45  | 1.18  | 1.10  | 1.32  | -0.05 ns  |
| Impad1        | inositol monophosphatase domain containing 1                                                                                         | 242291 | 1.27  | 1.62  | 1.29  | 0.97  | -0.24 ns  |
| 2700081O15Rik | RIKEN cDNA 2700081O15 gene                                                                                                           | 108899 | 0.72  | 0.70  | 0.36  | 2.03  | 0.85 *    |
| Pkn2          | protein kinase N2                                                                                                                    | 109333 | 1.41  | 1.44  | 1.07  | 1.31  | 0.39 ns   |
| Chd8          | chromodomain helicase DNA binding protein 8                                                                                          | 67772  | 1.60  | 1.43  | 1.38  | 1.16  | 0.56 ns   |
| Wipf2         | WAS/WASL interacting protein family, member 2                                                                                        | 68524  | 0.88  | 0.91  | 0.92  | 0.95  | -0.25 ns  |
| Dvl1          | dishevelled, dsh homolog 1 (Drosophila)                                                                                              | 13542  | 3.05  | 2.75  | 3.16  | 0.96  | -0.37 ns  |
| Il6st         | interleukin 6 signal transducer                                                                                                      | 16195  | 0.87  | 1.19  | 0.92  | 0.95  | -0.04 ns  |
| F2r           | coagulation factor II (thrombin) receptor                                                                                            | 14062  | 4.06  | 5.57  | 5.86  | 0.69  | -0.64 ns  |
| Rpa1          | replication protein A1                                                                                                               | 68275  | 8.39  | 8.15  | 6.23  | 1.34  | 0.45 ns   |
| Aldh18a1      | aldehyde dehydrogenase 18 family, member A1                                                                                          | 56454  | 3.41  | 4.27  | 2.24  | 1.51  | 0.57 ns   |
| Enoph1        | enolase-phosphatase 1                                                                                                                | 67870  | 0.78  | 0.88  | 0.84  | 0.92  | 0.00 ns   |
| Arf3          | ADP-ribosylation factor 3                                                                                                            | 11842  | 2.85  | 3.01  | 3.34  | 0.85  | -0.67 ns  |
| Parr          | poly(A)-specific ribonuclease (deadenylation nuclease)                                                                               | 74108  | 1.23  | 1.05  | 1.31  | 0.94  | -0.09 ns  |
| Fuk           | fucokinase                                                                                                                           | 234730 | 0.37  | 0.39  | 0.39  | 0.94  | -0.58 ns  |
| Bslc2         | Bernardinelli-Seip congenital lipodystrophy 2 homolog (human)                                                                        | 14705  | 0.65  | 0.65  | 0.31  | 2.06  | 0.66 ns   |
| Fbxo28        | F-box protein 28                                                                                                                     | 67948  | 0.60  | 0.55  | 0.54  | 1.11  | -0.13 ns  |
| Ckap5         | cytoskeleton associated protein 5                                                                                                    | 75786  | 1.33  | 1.13  | 1.31  | 1.01  | 0.23 ns   |
| Wdly1         | WD repeat and FYVE domain containing 1                                                                                               | 69368  | 0.97  | 0.97  | 0.59  | 1.63  | 0.71 ns   |
| Pcdh19        | protocadherin 19                                                                                                                     | 279653 | 0.36  | 0.20  | 0.02  | 14.36 | 0.45 ns   |
| Sgol2         | shugoshin-like 2 (S. pombe)                                                                                                          | 68549  | 0.90  | 0.85  | 0.79  | 1.13  | 0.58 ns   |
| 9930021J17Rik | RIKEN cDNA 9930021J17 gene                                                                                                           | 229488 | 0.44  | 0.30  | 0.17  | 2.54  | 0.39 ns   |
| Polrmt        | polymerase (RNA) mitochondrial (DNA directed)                                                                                        | 216151 | 1.02  | 0.98  | 0.95  | 1.07  | -0.38 ns  |
| Gpr172b       | G protein-coupled receptor 172B                                                                                                      | 52710  | 0.48  | 0.38  | 0.52  | 0.92  | -0.02 ns  |
| Acvr2a        | Activin receptor IIA                                                                                                                 | 11480  | 1.63  | 1.47  | 1.33  | 1.22  | -0.15 ns  |
| Ccbe1         | collagen and calcium binding EGF domains 1                                                                                           | 320924 | 0.17  | 0.28  | 0.37  | 0.45  | 0.11 ns   |
| Zcchc11       | zinc finger, CCHC domain containing 11                                                                                               | 230594 | 0.64  | 0.61  | 0.68  | 0.93  | -0.62 ns  |
| Gpr126        | G protein-coupled receptor 126                                                                                                       | 215798 | 1.69  | 1.04  | 0.40  | 4.16  | 0.51 ns   |
| Zfp217        | zinc finger protein 217                                                                                                              | 228913 | 0.56  | 0.58  | 0.64  | 0.88  | -0.59 ns  |
| Sra1          | steroid receptor RNA activator 1                                                                                                     | 24068  | 0.94  | 1.17  | 1.62  | 0.58  | -0.61 ns  |
| Syde2         |                                                                                                                                      | 214804 | 0.84  | 0.92  | 0.59  | 1.43  | 0.36 ns   |
| EG620382      | Predicted gene, EG620382                                                                                                             | 620382 | 0.48  | 0.44  | 0.25  | 1.91  | 0.42 ns   |
| Erc1          | excision repair cross-complementing rodent repair deficiency, complementation group 1                                                | 13870  | 0.90  | 0.81  | 1.06  | 0.85  | 0.00 ns   |
| Ctnnd1        | catenin (cadherin associated protein), delta 1                                                                                       | 12388  | 2.33  | 1.72  | 1.28  | 1.82  | 0.59 ns   |
| Rsad1         | radical S-adenosyl methionine domain containing 1                                                                                    | 237926 | 0.81  | 0.62  | 0.68  | 1.18  | 0.34 ns   |
| Pcsk9         | proprotein convertase subtilisin/kexin type 9                                                                                        | 100102 | 0.39  | 0.37  | 0.48  | 0.80  | -0.79 ns  |
| EG433144      |                                                                                                                                      | 433144 | 2.00  | 1.44  | 1.66  | 1.19  | -0.02 ns  |
| Txndc14       |                                                                                                                                      | 66958  | 2.00  | 1.44  | 1.66  | 1.19  | -0.02 ns  |
| Ythdf1        | YTH domain family 1                                                                                                                  | 228994 | 2.43  | 2.61  | 2.22  | 1.09  | -0.08 ns  |

|               |                                                                                     |        |       |       |       |      |          |
|---------------|-------------------------------------------------------------------------------------|--------|-------|-------|-------|------|----------|
| Rnpc3         | RNA-binding region (RNP1, RRM) containing 3                                         | 67225  | 0.55  | 0.87  | 0.69  | 0.80 | -0.58 ns |
| P4hb          | prolyl 4-hydroxylase, beta polypeptide                                              | 18453  | 11.18 | 9.97  | 11.71 | 0.95 | 0.26 ns  |
| Alcam         | activated leukocyte cell adhesion molecule                                          | 11658  | 2.79  | 2.03  | 1.51  | 1.84 | -0.12 ns |
| Fbxw11        | F-box and WD-40 domain protein 11                                                   | 103583 | 7.44  | 7.26  | 8.73  | 0.85 | -0.56 ns |
| Pknox1        | Pbx/knotted 1 homeobox                                                              | 18771  | 0.49  | 0.43  | 0.39  | 1.24 | 0.75 ns  |
| Lrrc45        | leucine rich repeat containing 45                                                   | 217366 | 0.74  | 0.83  | 0.90  | 0.81 | -0.77 ns |
| Gatad2b       | GATA zinc finger domain containing 2B                                               | 229542 | 1.27  | 1.22  | 0.91  | 1.39 | 0.60 ns  |
| Zfp513        | zinc finger protein 513                                                             | 101023 | 0.32  | 0.35  | 0.38  | 0.84 | -0.66 ns |
| Gprc5a        | G protein-coupled receptor, family C, group 5, member A                             | 232431 | 2.74  | 2.47  | 3.29  | 0.83 | -0.70 ns |
| Noc3l         | nucleolar complex associated 3 homolog (S. cerevisiae)                              | 57753  | 0.38  | 0.45  | 0.30  | 1.27 | 0.61 ns  |
| Ammecr1l      | AMME chromosomal region gene 1-like                                                 | 225339 | 3.87  | 4.79  | 4.60  | 0.84 | 0.12 ns  |
| Coro7         | coronin 7                                                                           | 78885  | 1.40  | 1.27  | 1.57  | 0.89 | -0.70 ns |
| Polr3a        | polymerase (RNA) III (DNA directed) polypeptide A                                   | 218832 | 0.56  | 0.59  | 0.73  | 0.77 | -0.72 ns |
| Mcl1          | myeloid cell leukemia sequence 1                                                    | 17210  | 5.29  | 5.57  | 4.31  | 1.22 | 0.43 ns  |
| Casp9         | caspase 9                                                                           | 12371  | 0.46  | 0.42  | 0.45  | 1.02 | 0.04 ns  |
| Prkaa1        | protein kinase, AMP-activated, alpha 1 catalytic subunit                            | 105787 | 0.34  | 0.40  | 0.63  | 0.54 | -0.89 *  |
| Fubp1         | far upstream element (FUSE) binding protein 1                                       | 51886  | 2.17  | 2.34  | 1.14  | 1.90 | 0.47 ns  |
| Dnajc14       | DnaJ (Hsp40) homolog, subfamily C, member 14                                        | 74330  | 1.68  | 1.64  | 1.39  | 1.21 | 0.87 *   |
| LOC633966     | similar to guanine nucleotide binding protein-like 2 (nucleolar)                    | 633966 | 0.42  | 0.56  | 0.71  | 0.59 | -0.70 ns |
| Nek2          | NIMA (never in mitosis gene a)-related expressed kinase 2                           | 18005  | 1.63  | 1.85  | 1.53  | 1.06 | 0.60 ns  |
| Api5          | apoptosis inhibitor 5                                                               | 11800  | 7.97  | 6.83  | 7.47  | 1.06 | -0.29 ns |
| Zbtb20        | zinc finger and BTB domain containing 20                                            | 56490  | 1.98  | 1.56  | 0.91  | 2.18 | 0.77 ns  |
| Rps8          | ribosomal protein S8                                                                | 20116  | 17.26 | 17.97 | 15.48 | 1.11 | 0.24 ns  |
| Kif2c         | kinesin family member 2C                                                            | 73804  | 0.96  | 1.07  | 1.51  | 0.64 | -0.33 ns |
| Vps37c        | Vacuolar protein sorting 37C (yeast)                                                | 107305 | 1.61  | 1.47  | 0.70  | 2.29 | 0.88 *   |
| Nudt16l1      | nudix (nucleoside diphosphate linked moiety X)-type motif 16-like 1                 | 66911  | 2.32  | 2.18  | 2.50  | 0.92 | -0.19 ns |
| Zfp36l2       | zinc finger protein 36, C3H type-like 2                                             | 12193  | 4.70  | 3.79  | 3.25  | 1.44 | 0.78 ns  |
| Rhoa          | ras homolog gene family, member A                                                   | 11848  | 5.53  | 4.99  | 5.07  | 1.09 | 0.62 ns  |
| Lsg1          | large subunit GTPase 1 homolog (S. cerevisiae)                                      | 224092 | 0.55  | 0.59  | 0.69  | 0.80 | -0.43 ns |
| Dcbl2         | discoidin, CUB and LCCL domain containing 2                                         | 73379  | 1.21  | 1.18  | 1.71  | 0.71 | -0.74 ns |
| Cenpj         | centromere protein J                                                                | 219103 | 0.39  | 0.35  | 0.53  | 0.73 | -0.62 ns |
| D43002J02Rik  | RIKEN cDNA D43002J02 gene                                                           | 319545 | 0.39  | 0.40  | 0.46  | 0.85 | -0.78 ns |
| Cd151         | CD151 antigen                                                                       | 12476  | 2.00  | 2.35  | 3.03  | 0.65 | -0.92 ** |
| Prss23        | protease, serine, 23                                                                | 76453  | 0.97  | 0.96  | 0.71  | 1.36 | 0.12 ns  |
| Fkbp9         | FK506 binding protein 9                                                             | 27055  | 3.20  | 3.62  | 3.30  | 0.97 | -0.48 ns |
| Atp6ap2       | ATPase, H+ transporting, lysosomal accessory protein 2                              | 70495  | 4.38  | 5.43  | 8.96  | 0.49 | -0.70 ns |
| Clu           | clusterin                                                                           | 12759  | 1.84  | 3.85  | 9.01  | 0.20 | -0.85 *  |
| Csnk1d        | casein kinase 1, delta                                                              | 104318 | 3.51  | 3.50  | 3.19  | 1.10 | 0.71 ns  |
| BC049807      | cDNA sequence BC049807                                                              | 381066 | 0.78  | 0.70  | 0.66  | 1.18 | 0.63 ns  |
| Rps14         |                                                                                     | 20044  | 23.30 | 21.92 | 18.99 | 1.22 | 0.79 ns  |
| Vamp3         | vesicle-associated membrane protein 3                                               | 22319  | 2.14  | 2.10  | 2.47  | 0.86 | -0.18 ns |
| Apex1         | apurinic/apyrimidinic endonuclease 1                                                | 11792  | 4.08  | 3.70  | 3.52  | 1.15 | -0.23 ns |
| Kif22         | kinesin family member 22                                                            | 110033 | 1.79  | 2.42  | 4.01  | 0.44 | -0.77 ns |
| Der1l         | Der1-like domain family, member 1                                                   | 67819  | 4.22  | 4.19  | 4.93  | 0.85 | -0.73 ns |
| Pitpm1        | phosphatidylinositol membrane-associated 1                                          | 18739  | 2.64  | 2.82  | 1.97  | 1.34 | 0.82 *   |
| Alkbh5        | alkB, alkylation repair homolog 5 (E. coli)                                         | 268420 | 0.92  | 0.79  | 1.29  | 0.71 | -0.53 ns |
| Ppp2r2a       | protein phosphatase 2 (formerly 2A), regulatory subunit B (PR 52), alpha isoform    | 71978  | 2.38  | 2.18  | 2.19  | 1.08 | 0.64 ns  |
| Ppp1r12a      | protein phosphatase 1, regulatory (inhibitor) subunit 12A                           | 17931  | 3.69  | 3.39  | 2.76  | 1.33 | 0.48 ns  |
| Atp2c1        | ATPase, Ca+++-sequestering                                                          | 235574 | 1.33  | 1.29  | 1.00  | 1.32 | 0.60 ns  |
| Rab21         | RAB21, member RAS oncogene family                                                   | 216344 | 1.82  | 1.77  | 1.89  | 0.96 | -0.67 ns |
| Slc4a1ap      | solute carrier family 4 (anion exchanger), member 1, adaptor protein                | 20534  | 0.41  | 0.39  | 0.51  | 0.79 | -0.61 ns |
| Galnt12       | UDP-N-acetyl-alpha-D-galactosamine:polypeptide N-acetylgalactosaminyltransferase 12 | 230145 | 0.18  | 0.49  | 0.52  | 0.34 | -0.83 *  |
| Ddx17         | DEAD (Asp-Glu-Ala-Asp) box polypeptide 17                                           | 67040  | 9.18  | 9.47  | 8.67  | 1.05 | -0.02 ns |
| Fancc         | Fanconi anemia, complementation group B                                             | 237211 | 0.22  | 0.26  | 0.30  | 0.73 | 0.07 ns  |
| Sp6           | trans-acting transcription factor 6                                                 | 83395  | 0.40  | 0.29  | 0.29  | 1.40 | 0.16 ns  |
| Eml5          | echinoderm microtubule associated protein like 5                                    | 319670 | 0.48  | 0.49  | 0.45  | 1.05 | -0.07 ns |
| Ctnna1        | catenin (cadherin associated protein), alpha 1                                      | 12385  | 10.77 | 11.30 | 10.96 | 0.98 | -0.20 ns |
| Wdr46         | WD repeat domain 46                                                                 | 57315  | 1.52  | 1.47  | 1.17  | 1.29 | 0.59 ns  |
| Eef2k         | eukaryotic elongation factor-2 kinase                                               | 13631  | 0.54  | 0.50  | 0.54  | 0.99 | -0.51 ns |
| Pacsin3       | protein kinase C and casein kinase substrate in neurons 3                           | 80708  | 0.64  | 0.45  | 0.53  | 1.19 | -0.06 ns |
| Poldip3       | polymerase (DNA-directed), delta interacting protein 3                              | 73826  | 4.74  | 4.72  | 4.78  | 0.99 | 0.09 ns  |
| Grsf1         | G-rich RNA sequence binding factor 1                                                | 231413 | 3.27  | 3.51  | 4.68  | 0.69 | -0.87 *  |
| Nup1          | Nucleoporin like 1                                                                  | 71844  | 3.18  | 3.52  | 3.04  | 1.04 | 0.44 ns  |
| Cog1          | component of oligomeric golgi complex 1                                             | 16834  | 0.67  | 0.56  | 0.65  | 1.03 | 0.43 ns  |
| Pofut2        | protein O-fucosyltransferase 2                                                      | 80294  | 1.59  | 1.68  | 1.70  | 0.93 | -0.37 ns |
| Cpsf3         | cleavage and polyadenylation specificity factor 3                                   | 54451  | 2.39  | 2.54  | 2.98  | 0.80 | -0.51 ns |
| Dusp18        | dual specificity phosphatase 18                                                     | 75219  | 0.28  | 0.33  | 0.31  | 0.91 | -0.59 ns |
| 3222402P14Rik | RIKEN cDNA 3222402P14 gene                                                          | 235542 | 1.59  | 1.48  | 0.83  | 1.90 | 0.53 ns  |
| Hexb          | hexosaminidase B                                                                    | 15212  | 1.05  | 1.56  | 2.09  | 0.50 | -0.84 *  |
| Bicd2         | bicaudal D homolog 2 (Drosophila)                                                   | 76895  | 1.64  | 1.48  | 1.62  | 1.01 | 0.47 ns  |
| Ttc14         | tetratricopeptide repeat domain 14                                                  | 67120  | 2.01  | 2.00  | 1.23  | 1.63 | 0.29 ns  |
| Frs2          | fibroblast growth factor receptor substrate 2                                       | 327826 | 1.29  | 1.12  | 0.89  | 1.44 | 0.47 ns  |
| Ergic1        | endoplasmic reticulum-golgi intermediate compartment (ERGIC) 1                      | 67458  | 1.43  | 1.37  | 1.10  | 1.30 | 0.69 ns  |
| Tmem39b       | transmembrane protein 39b                                                           | 230770 | 0.34  | 0.40  | 0.45  | 0.76 | -0.97 ** |
| 6330416L07Rik | RIKEN cDNA 6330416L07 gene                                                          | 319615 | 0.31  | 0.40  | 0.21  | 1.43 | 0.59 ns  |
| Son           | Son cell proliferation protein                                                      | 20658  | 0.70  | 0.58  | 0.55  | 1.27 | 0.79 ns  |
| Xppnep3       | X-prolyl aminopeptidase (aminopeptidase P) 3, putative                              | 321003 | 0.66  | 0.67  | 0.60  | 1.09 | 0.34 ns  |
| 0610007P22Rik | RIKEN cDNA 0610007P22 gene                                                          | 68327  | 0.50  | 0.53  | 0.34  | 1.47 | 0.87 *   |
| Sf3b5         | splicing factor 3b, subunit 5                                                       | 66125  | 4.29  | 3.71  | 4.56  | 0.94 | -0.51 ns |
| EG666448      |                                                                                     | 666448 | 19.77 | 18.34 | 14.47 | 1.36 | 0.69 ns  |
| EG666501      |                                                                                     | 666501 | 19.77 | 18.34 | 14.47 | 1.36 | 0.69 ns  |
| EG666548      |                                                                                     | 666548 | 19.77 | 18.34 | 14.47 | 1.36 | 0.69 ns  |
| EG666738      |                                                                                     | 666738 | 19.77 | 18.34 | 14.47 | 1.36 | 0.69 ns  |
| Rpl23a        | ribosomal protein L23a                                                              | 268449 | 24.49 | 22.10 | 17.41 | 1.40 | 0.84 *   |
| Cox15         | COX15 homolog, cytochrome c oxidase assembly protein (yeast)                        | 226139 | 0.53  | 0.61  | 0.82  | 0.64 | -0.80 ns |

|                |                                                                                             |        |       |       |       |       |          |
|----------------|---------------------------------------------------------------------------------------------|--------|-------|-------|-------|-------|----------|
| Rusc1          | RUN and SH3 domain containing 1                                                             | 72296  | 0.59  | 0.60  | 0.49  | 1.21  | 0.04 ns  |
| Gja1           | gap junction membrane channel protein alpha 1                                               | 14609  | 0.63  | 0.23  | 0.01  | 86.72 | 0.96 **  |
| Qdpr           | quinoid dihydropteridine reductase                                                          | 110391 | 2.65  | 3.05  | 2.30  | 1.14  | 0.08 ns  |
| Zfp622         | zinc finger protein 622                                                                     | 52521  | 6.01  | 5.01  | 4.89  | 1.22  | 0.71 ns  |
| Pols           | polymerase (DNA directed) sigma                                                             | 210106 | 0.48  | 0.81  | 1.00  | 0.48  | -0.54 ns |
| Slc25a40       | solute carrier family 25, member 40                                                         | 319653 | 0.67  | 0.56  | 0.62  | 1.08  | -0.24 ns |
| 4933439F18Rik  | RIKEN cDNA 4933439F18 gene                                                                  | 66771  | 0.62  | 0.61  | 0.83  | 0.75  | -0.21 ns |
| Gga3           | golgi associated, gamma adaptin ear containing, ARF binding protein 3                       | 260302 | 0.45  | 0.43  | 0.42  | 1.07  | 0.73 ns  |
| RP23-480B19.10 | similar to histone 2a                                                                       | 665433 | 13.58 | 13.56 | 14.24 | 0.95  | 0.30 ns  |
| Pcyt1a         | phosphate cytidylyltransferase 1, choline, alpha isoform                                    | 13026  | 0.64  | 0.61  | 0.81  | 0.78  | -0.39 ns |
| Dkc1           | dyskeratosis congenita 1, dyskerin homolog (human)                                          | 245474 | 0.94  | 0.94  | 1.01  | 0.92  | -0.52 ns |
| Hook1          | hook homolog 1 (Drosophila)                                                                 | 77963  | 1.72  | 1.75  | 1.90  | 0.90  | -0.12 ns |
| Rab11fip3      | RAB11 family interacting protein 3 (class II)                                               | 215445 | 0.51  | 0.42  | 0.38  | 1.34  | 0.53 ns  |
| Ccdc90a        | coiled-coil domain containing 90A                                                           | 76137  | 1.26  | 1.06  | 1.22  | 1.03  | 0.14 ns  |
| Mtrf1l         | mitochondrial translational release factor 1-like                                           | 108853 | 0.39  | 0.34  | 0.26  | 1.46  | 0.18 ns  |
| Zfp560         | zinc finger protein 560                                                                     | 434377 | 0.38  | 0.36  | 0.28  | 1.38  | 0.79 ns  |
| Lrch1          | leucine-rich repeats and calponin homology (CH) domain containing 1                         | 380916 | 0.57  | 0.59  | 0.61  | 0.92  | -0.29 ns |
| 4930402H24Rik  | RIKEN cDNA 4930402H24 gene                                                                  | 228602 | 0.91  | 1.07  | 0.81  | 1.12  | 0.00 ns  |
| Pde7a          | phosphodiesterase 7A                                                                        | 18583  | 1.58  | 1.44  | 1.24  | 1.27  | 0.11 ns  |
| Eea1           | early endosome antigen 1                                                                    | 216238 | 0.72  | 0.71  | 0.99  | 0.73  | -0.71 ns |
| AU019823       | expressed sequence AU019823                                                                 | 270156 | 0.52  | 0.47  | 0.35  | 1.48  | 0.95 **  |
| Zfp384         | zinc finger protein 384                                                                     | 269800 | 1.15  | 1.03  | 1.20  | 0.95  | -0.49 ns |
| Ptov1          | prostate tumor over expressed gene 1                                                        | 84113  | 1.45  | 1.20  | 1.35  | 1.06  | -0.20 ns |
| Dtymk          | deoxythymidylate kinase                                                                     | 21915  | 2.30  | 2.80  | 1.83  | 1.25  | 0.17 ns  |
| Rab20          | RAB20, member RAS oncogene family                                                           | 19332  | 0.54  | 0.52  | 0.41  | 1.31  | 0.20 ns  |
| Slc9a3r1       | solute carrier family 9 (sodium/hydrogen exchanger), isoform 3 regulator 1                  | 26941  | 5.36  | 4.49  | 4.19  | 1.27  | 0.36 ns  |
| Irak1          | interleukin-1 receptor-associated kinase 1                                                  | 16179  | 1.11  | 1.18  | 2.35  | 0.47  | -0.70 ns |
| Taf15          | TAF15 RNA polymerase II, TATA box binding protein (TBP)-associated factor                   | 70439  | 0.80  | 0.89  | 0.66  | 1.20  | 0.41 ns  |
| Atxn2          | ataxin 2                                                                                    | 20239  | 1.31  | 1.23  | 1.12  | 1.16  | -0.22 ns |
| Pigo           | phosphatidylinositol glycan anchor biosynthesis, class O                                    | 56703  | 0.37  | 0.40  | 0.59  | 0.63  | -0.72 ns |
| Slco4a1        | solute carrier organic anion transporter family, member 4a1                                 | 108115 | 0.99  | 1.29  | 2.00  | 0.49  | -0.92 *  |
| Flot2          | flotillin 2                                                                                 | 14252  | 1.86  | 2.14  | 1.41  | 1.31  | 0.56 ns  |
| Ficn           | Folliculin                                                                                  | 216805 | 0.43  | 0.48  | 0.59  | 0.73  | -0.91 *  |
| Ddx39          | DEAD (Asp-Glu-Ala-Asp) box polypeptide 39                                                   | 68278  | 3.74  | 4.93  | 5.34  | 0.70  | -0.55 ns |
| Frm4b          | FERM domain containing 4B                                                                   | 232288 | 0.71  | 0.83  | 0.75  | 0.94  | -0.01 ns |
| Exod1          | exonuclease domain containing 1                                                             | 71151  | 0.40  | 0.54  | 0.63  | 0.63  | -0.43 ns |
| 1110031B06Rik  | RIKEN cDNA 1110031B06 gene                                                                  | 67826  | 4.66  | 3.52  | 3.30  | 1.41  | 0.59 ns  |
| Entpd4         | ectonucleoside triphosphate diphosphohydrolase 4                                            | 67464  | 0.52  | 0.60  | 0.56  | 0.94  | -0.55 ns |
| Atad3a         | ATPase family, AAA domain containing 3A                                                     | 108888 | 1.75  | 1.90  | 1.82  | 0.96  | 0.06 ns  |
| Hax1           |                                                                                             | 23897  | 11.60 | 11.55 | 8.42  | 1.37  | 0.80 ns  |
| Silg111        |                                                                                             | 20461  | 11.60 | 11.55 | 8.42  | 1.37  | 0.80 ns  |
| Rnf40          | ring finger protein 40                                                                      | 233900 | 0.52  | 0.43  | 0.49  | 1.07  | 0.26 ns  |
| Baz2a          | bromodomain adjacent to zinc finger domain, 2A                                              | 116848 | 1.26  | 1.08  | 1.09  | 1.15  | 0.40 ns  |
| Gpd1l          |                                                                                             | 333433 | 0.77  | 0.69  | 0.54  | 1.42  | 0.78 ns  |
| AI316807       | expressed sequence AI316807                                                                 | 102032 | 0.47  | 0.58  | 0.54  | 0.87  | -0.15 ns |
| Dbp            | D site albumin promoter binding protein                                                     | 13170  | 0.34  | 0.41  | 0.45  | 0.76  | -0.41 ns |
| Zbtb24         | zinc finger and BTB domain containing 24                                                    | 268294 | 0.37  | 0.30  | 0.35  | 1.08  | -0.32 ns |
| Pggt1b         | protein geranylgeranyltransferase type 1, beta subunit                                      | 225467 | 0.62  | 0.87  | 0.68  | 0.91  | 0.13 ns  |
| 6030443O07Rik  | RIKEN cDNA 6030443O07 gene                                                                  | 226151 | 2.68  | 3.21  | 1.95  | 1.37  | 0.67 ns  |
| Rex2           | reduced expression 2                                                                        | 19715  | 0.39  | 0.45  | 0.21  | 1.82  | 0.01 ns  |
| Mid1           | midline 1                                                                                   | 17318  | 0.79  | 0.90  | 0.83  | 0.94  | 0.34 ns  |
| Usp7           | ubiquitin specific peptidase 7                                                              | 252870 | 0.47  | 0.45  | 0.48  | 0.97  | -0.12 ns |
| LOC545600      |                                                                                             | 545600 | 1.84  | 2.76  | 4.01  | 0.46  | -0.95 ** |
| Adamts5        | ADAMTS-like 5                                                                               | 66548  | 0.29  | 0.43  | 0.18  | 1.64  | 0.53 ns  |
| Sumo1          | SMT3 suppressor of mif two 3 homolog 1 (yeast)                                              | 22218  | 5.64  | 5.71  | 5.53  | 1.02  | -0.15 ns |
| Adk            | adenosine kinase                                                                            | 11534  | 2.61  | 2.74  | 1.76  | 1.48  | 0.68 ns  |
| Atxn1          | ataxin 1                                                                                    | 20238  | 0.46  | 0.47  | 0.40  | 1.14  | -0.11 ns |
| LOC626832      |                                                                                             | 626832 | 1.21  | 1.14  | 0.57  | 2.11  | 0.51 ns  |
| Ltbp3          | latent transforming growth factor beta binding protein 3                                    | 16998  | 3.58  | 3.72  | 3.67  | 0.97  | -0.41 ns |
| Akr7a5         | aldo-keto reductase family 7, member A5 (aflatoxin aldehyde reductase)                      | 110198 | 0.80  | 0.70  | 0.65  | 1.22  | 0.84 *   |
| Ngdn           | neuroguidin, EIF4E binding protein                                                          | 68966  | 2.54  | 2.88  | 2.26  | 1.12  | 0.59 ns  |
| Mcm7           | minichromosome maintenance deficient 7 (S. cerevisiae)                                      | 17220  | 14.52 | 13.99 | 12.89 | 1.12  | 0.89 *   |
| 4930504E06Rik  | RIKEN cDNA 4930504E06 gene                                                                  | 75007  | 1.49  | 1.80  | 1.62  | 0.91  | -0.60 ns |
| Fdft1          | farnesyl diphosphate farnesyl transferase 1                                                 | 14137  | 3.02  | 2.75  | 3.15  | 0.95  | -0.11 ns |
| Evi1           | ecotropic viral integration site 1                                                          | 14013  | 5.10  | 4.56  | 2.75  | 1.85  | 0.82 *   |
| Laptm4b        | lysosomal-associated protein transmembrane 4B                                               | 114128 | 3.59  | 3.40  | 3.29  | 1.08  | 0.07 ns  |
| Clcn3          | chloride channel 3                                                                          | 12725  | 4.17  | 3.86  | 3.68  | 1.13  | 0.77 ns  |
| Matr3          | matrin 3                                                                                    | 17184  | 7.05  | 7.16  | 6.58  | 1.07  | 0.73 ns  |
| Dos            | downstream of Stk11                                                                         | 216164 | 0.36  | 0.39  | 0.42  | 0.85  | -0.18 ns |
| Trim27         | tripartite motif protein 27                                                                 | 19720  | 4.72  | 5.09  | 6.67  | 0.70  | -0.90 *  |
| Ppp2r1a        | protein phosphatase 2 (formerly 2A), regulatory subunit A (PR 65), alpha isoform            | 51792  | 11.81 | 10.09 | 8.20  | 1.43  | 0.84 *   |
| Pttg1          | pituitary tumor-transforming 1                                                              | 30939  | 7.17  | 6.82  | 6.85  | 1.04  | 0.54 ns  |
| 4632411B12Rik  | RIKEN cDNA 4632411B12 gene                                                                  | 226976 | 0.90  | 0.89  | 0.67  | 1.32  | 0.76 ns  |
| Ubn1           | ubiquitin 1                                                                                 | 170644 | 0.93  | 1.02  | 1.00  | 0.93  | -0.13 ns |
| Dsel           | dermatan sulfate epimerase-like                                                             | 319901 | 0.54  | 0.51  | 0.24  | 2.23  | 0.54 ns  |
| Ankrd56        | ankyrin repeat domain 56                                                                    | 78088  | 0.48  | 0.52  | 0.60  | 0.80  | -0.84 *  |
| Cep63          | centrosomal protein 63                                                                      | 28135  | 0.30  | 0.43  | 0.44  | 0.67  | -0.22 ns |
| 4932432K03Rik  | RIKEN cDNA 4932432K03 gene                                                                  | 74385  | 0.46  | 0.40  | 0.39  | 1.19  | 0.73 ns  |
| Lrrc20         | leucine rich repeat containing 20                                                           | 216011 | 0.41  | 0.44  | 0.35  | 1.16  | 0.24 ns  |
| Arhgap11a      | Rho GTPase activating protein 11A                                                           | 228482 | 2.59  | 3.08  | 2.80  | 0.92  | 0.36 ns  |
| Phca           | phytoceramidase, alkaline                                                                   | 66190  | 0.50  | 0.52  | 0.56  | 0.89  | -0.02 ns |
| Lrrc8e         | leucine rich repeat containing 8 family, member E                                           | 72267  | 0.51  | 0.58  | 0.66  | 0.78  | 0.13 ns  |
| Ddx11          | DEAD/H (Asp-Glu-Ala-Asp/His) box polypeptide 11 (CHL1-like helicase homolog, S. cerevisiae) | 320209 | 0.44  | 0.47  | 0.35  | 1.23  | 0.42 ns  |



|               |                                                                                                                  |        |       |       |       |      |          |
|---------------|------------------------------------------------------------------------------------------------------------------|--------|-------|-------|-------|------|----------|
| Grit          | Rho GTPase-activating protein                                                                                    | 330914 | 0.57  | 0.42  | 0.35  | 1.63 | 0.73 ns  |
| B430203M17Rik | RIKEN cDNA B430203M17 gene                                                                                       | 320193 | 0.86  | 0.87  | 0.67  | 1.28 | 0.21 ns  |
| Thyn1         | thymocyte nuclear protein 1                                                                                      | 77862  | 0.43  | 0.38  | 0.34  | 1.26 | 0.61 ns  |
| Edf1          |                                                                                                                  | 59022  | 3.76  | 4.13  | 3.77  | 0.99 | -0.30 ns |
| LOC665181     |                                                                                                                  | 665181 | 3.76  | 4.13  | 3.77  | 0.99 | -0.30 ns |
| LOC674653     |                                                                                                                  | 674653 | 3.76  | 4.13  | 3.77  | 0.99 | -0.30 ns |
| Rnasen        | ribonuclease III, nuclear                                                                                        | 14000  | 4.08  | 3.87  | 4.35  | 0.93 | -0.50 ns |
| Hars          | histidyl-tRNA synthetase                                                                                         | 15115  | 2.19  | 2.79  | 2.52  | 0.87 | 0.17 ns  |
| LOC433745     |                                                                                                                  | 433745 | 0.91  | 1.12  | 1.02  | 0.89 | -0.60 ns |
| EG433326      |                                                                                                                  | 433326 | 1.24  | 1.44  | 2.45  | 0.50 | -0.74 ns |
| EG623402      |                                                                                                                  | 623402 | 1.24  | 1.44  | 2.45  | 0.50 | -0.74 ns |
| LOC630624     |                                                                                                                  | 630624 | 1.24  | 1.44  | 2.45  | 0.50 | -0.74 ns |
| Tor2a         | torsin family 2, member A                                                                                        | 30933  | 0.80  | 1.15  | 0.81  | 0.98 | -0.32 ns |
| Eif4h         | eukaryotic translation initiation factor 4H                                                                      | 22384  | 9.53  | 9.89  | 10.63 | 0.89 | -0.43 ns |
| Muc4          | mucin 4                                                                                                          | 140474 | 0.13  | 0.37  | 0.95  | 0.14 | -0.70 ns |
| Slc44a2       | solute carrier family 44, member 2                                                                               | 68682  | 8.91  | 5.77  | 6.40  | 1.39 | 0.49 ns  |
| Tmem180       | transmembrane protein 180                                                                                        | 75146  | 1.41  | 1.47  | 1.25  | 1.13 | 0.34 ns  |
| Ptpn2         | protein tyrosine phosphatase, non-receptor type 2                                                                | 19255  | 2.28  | 2.93  | 2.96  | 0.77 | 0.12 ns  |
| Mlrps24       | mitochondrial ribosomal protein S24                                                                              | 64660  | 1.07  | 1.14  | 1.37  | 0.78 | -0.64 ns |
| Vwa2          | von Willebrand factor A domain containing 2                                                                      | 240675 | 0.75  | 0.61  | 0.28  | 2.71 | 0.48 ns  |
| Btbd10        | BTB (POZ) domain containing 10                                                                                   | 68815  | 0.53  | 0.60  | 0.67  | 0.78 | -0.92 ** |
| Zcchc7        | zinc finger, CCHC domain containing 7                                                                            | 319885 | 0.38  | 0.35  | 0.32  | 1.19 | -0.18 ns |
| Clic4         | chloride intracellular channel 4 (mitochondrial)                                                                 | 29876  | 2.11  | 2.43  | 3.65  | 0.57 | -0.66 ns |
| Cryz          | Crystallin, zeta                                                                                                 | 12972  | 1.81  | 2.05  | 0.88  | 2.05 | 0.21 ns  |
| Pctk1         | PCTAIRE-motif protein kinase 1                                                                                   | 18555  | 3.24  | 3.40  | 5.32  | 0.61 | -0.66 ns |
| Rpl14         | ribosomal protein L14                                                                                            | 67115  | 16.13 | 17.76 | 13.76 | 1.17 | 0.59 ns  |
| Grn           | granulin                                                                                                         | 14824  | 7.40  | 6.61  | 6.92  | 1.06 | 0.65 ns  |
| Ttc13         | tetratricopeptide repeat domain 13                                                                               | 234875 | 0.94  | 1.18  | 0.89  | 1.05 | -0.15 ns |
| Sf3b2         | splicing factor 3b, subunit 2                                                                                    | 319322 | 3.92  | 4.46  | 4.11  | 0.95 | -0.38 ns |
| CommD9        | COMM domain containing 9                                                                                         | 76501  | 1.49  | 1.23  | 1.07  | 1.39 | 0.24 ns  |
| 2510039O18Rik | RIKEN cDNA 2510039O18 gene                                                                                       | 77034  | 0.59  | 0.67  | 0.71  | 0.83 | -0.67 ns |
| Cetn2         | centrin 2                                                                                                        | 26370  | 1.49  | 1.56  | 2.80  | 0.53 | -0.69 ns |
| Pebp1         | phosphatidylethanolamine binding protein 1                                                                       | 23980  | 15.88 | 12.70 | 13.60 | 1.16 | 0.38 ns  |
| Pigq          | phosphatidylinositol glycan anchor biosynthesis, class Q                                                         | 14755  | 4.96  | 4.44  | 2.94  | 1.68 | 0.96 **  |
| Atxn10        | ataxin 10                                                                                                        | 54138  | 11.99 | 11.40 | 11.31 | 1.05 | -0.25 ns |
| Timm17b       | translocase of inner mitochondrial membrane 17b                                                                  | 21855  | 0.77  | 0.93  | 1.28  | 0.60 | -0.18 ns |
| EG667723      |                                                                                                                  | 667723 | 10.52 | 11.36 | 10.34 | 1.01 | -0.18 ns |
| Ptp4a1        |                                                                                                                  | 19243  | 10.52 | 11.36 | 10.34 | 1.01 | -0.18 ns |
| Chchd6        | coiled-coil-helix-coiled-coil-helix domain containing 6                                                          | 66098  | 0.74  | 0.94  | 1.01  | 0.73 | -0.49 ns |
| Atxn2l        | ataxin 2-like                                                                                                    | 233871 | 0.67  | 0.54  | 0.63  | 1.07 | -0.12 ns |
| Wdr40a        | WD repeat domain 40A                                                                                             | 68970  | 0.51  | 0.57  | 0.67  | 0.75 | -0.37 ns |
| Slc4a7        | solute carrier family 4, sodium bicarbonate cotransporter, member 7                                              | 218756 | 0.82  | 0.77  | 0.67  | 1.21 | -0.42 ns |
| Nuak1         | NUAK family, SNF1-like kinase, 1                                                                                 | 77976  | 0.39  | 0.43  | 0.29  | 1.33 | 0.46 ns  |
| Zmyx6         | zinc finger, MYM-type 6                                                                                          | 100177 | 0.49  | 0.50  | 0.46  | 1.06 | -0.19 ns |
| Srrm2         | serine/arginine repetitive matrix 2                                                                              | 75956  | 6.06  | 6.20  | 3.65  | 1.65 | 0.80 ns  |
| Zzef1         | zinc finger, ZZ-type with EF hand domain 1                                                                       | 195018 | 0.35  | 0.34  | 0.41  | 0.84 | -0.21 ns |
| Tmem110       | transmembrane protein 110                                                                                        | 69179  | 0.37  | 0.41  | 0.32  | 1.15 | 0.38 ns  |
| Bicd1         | bicaudal D homolog 1 (Drosophila)                                                                                | 12121  | 0.44  | 0.32  | 0.31  | 1.43 | 0.73 ns  |
| Zfp207        | zinc finger protein 207                                                                                          | 22680  | 3.71  | 3.40  | 2.68  | 1.38 | 0.76 ns  |
| Rps10         |                                                                                                                  | 67097  | 27.80 | 24.87 | 19.73 | 1.40 | 0.87 *   |
| Wdr32         | WD repeat domain 32                                                                                              | 242418 | 0.27  | 0.27  | 0.37  | 0.74 | -0.81 ns |
| Adi1          | acireductone dioxygenase 1                                                                                       | 104923 | 1.23  | 1.40  | 1.31  | 0.93 | -0.49 ns |
| Adam15        | a disintegrin and metallopeptidase domain 15 (metargidin)                                                        | 11490  | 0.48  | 0.53  | 0.37  | 1.31 | 0.71 ns  |
| Odc1          |                                                                                                                  | 18263  | 3.95  | 4.29  | 4.73  | 0.83 | -0.14 ns |
| EG383032      |                                                                                                                  | 383032 | 8.35  | 9.02  | 8.98  | 0.93 | -0.46 ns |
| EG625298      |                                                                                                                  | 625298 | 9.61  | 10.29 | 10.37 | 0.92 | -0.70 ns |
| EG628061      |                                                                                                                  | 628061 | 9.61  | 10.29 | 10.37 | 0.92 | -0.70 ns |
| LOC637251     |                                                                                                                  | 637251 | 9.61  | 10.29 | 10.37 | 0.92 | -0.70 ns |
| LOC668239     |                                                                                                                  | 668239 | 9.61  | 10.29 | 10.37 | 0.92 | -0.70 ns |
| Rps13         |                                                                                                                  | 68052  | 9.61  | 10.29 | 10.37 | 0.92 | -0.70 ns |
| Snx16         | sorting nexin 16                                                                                                 | 74718  | 0.90  | 0.88  | 0.82  | 1.08 | 0.00 ns  |
| Eftud2        | elongation factor Tu GTP binding domain containing 2                                                             | 20624  | 4.16  | 4.19  | 4.41  | 0.94 | 0.30 ns  |
| Ywhae         | tyrosine 3-monooxygenase/tryptophan 5-monooxygenase activation protein, epsilon polypeptide                      | 22627  | 13.99 | 13.54 | 11.49 | 1.21 | 0.75 ns  |
| Ddx54         | DEAD (Asp-Glu-Ala-Asp) box polypeptide 54                                                                        | 71990  | 1.52  | 1.80  | 2.00  | 0.76 | -0.84 *  |
| Tnfrsf2       | tumor necrosis factor, alpha-induced protein 2                                                                   | 21928  | 2.47  | 3.37  | 2.38  | 1.03 | -0.09 ns |
| LOC629957     |                                                                                                                  | 629957 | 31.01 | 29.66 | 27.04 | 1.14 | 0.66 ns  |
| LOC637599     |                                                                                                                  | 637599 | 31.01 | 29.66 | 27.04 | 1.14 | 0.66 ns  |
| Rps29         |                                                                                                                  | 20090  | 31.01 | 29.66 | 27.04 | 1.14 | 0.66 ns  |
| Hsp90aa1      | heat shock protein 90kDa alpha (cytosolic), class A member 1                                                     | 15519  | 16.43 | 15.44 | 16.81 | 0.97 | -0.63 ns |
| Map3k12       | mitogen activated protein kinase kinase kinase 12                                                                | 26404  | 0.63  | 0.70  | 0.65  | 0.96 | -0.53 ns |
| Stom          | stomatin                                                                                                         | 13830  | 0.20  | 0.31  | 0.41  | 0.48 | -0.21 ns |
| Ninj1         | ninjurin 1                                                                                                       | 18081  | 1.70  | 1.81  | 1.90  | 0.89 | 0.06 ns  |
| Sema4a        | sema domain, immunoglobulin domain (Ig), transmembrane domain (TM) and short cytoplasmic domain, (semaphorin) 4A | 20351  | 0.07  | 0.24  | 0.65  | 0.11 | -0.64 ns |
| Phb2          | prohibitin 2                                                                                                     | 12034  | 5.40  | 5.29  | 3.29  | 1.63 | 0.82 *   |
| Ampd2         | adenosine monophosphate deaminase 2 (isoform L)                                                                  | 109674 | 1.88  | 2.35  | 1.91  | 0.98 | -0.37 ns |
| Nup54         | nucleoporin 54                                                                                                   | 269113 | 1.48  | 2.04  | 2.25  | 0.66 | -0.89 *  |
| Cds2          | CDP-diaclyglycerol synthase (phosphatidate cytidylyltransferase) 2                                               | 110911 | 2.23  | 2.57  | 2.79  | 0.80 | -0.42 ns |
| Blmh          | bleomycin hydrolase                                                                                              | 104184 | 2.78  | 2.93  | 2.01  | 1.37 | 0.77 ns  |
| Tfpt          | TCF3 (E2A) fusion partner                                                                                        | 69714  | 0.40  | 0.47  | 0.51  | 0.78 | -0.68 ns |
| Spint2        | serine protease inhibitor, Kunitz type 2                                                                         | 20733  | 8.58  | 8.36  | 10.43 | 0.82 | -0.73 ns |
| Ube2h         | ubiquitin-conjugating enzyme E2H                                                                                 | 22214  | 1.42  | 1.64  | 2.00  | 0.71 | -0.45 ns |
| AI413782      | expressed sequence AI413782                                                                                      | 104799 | 1.44  | 1.54  | 1.86  | 0.77 | -0.82 *  |
| Hn1           | hematological and neurological expressed sequence 1                                                              | 15374  | 2.96  | 4.97  | 6.15  | 0.48 | -0.55 ns |
| Nfat5         | nuclear factor of activated T-cells 5                                                                            | 54446  | 2.95  | 2.69  | 1.63  | 1.81 | 0.53 ns  |
| Zfp319        | zinc finger protein 319                                                                                          | 79233  | 0.21  | 0.26  | 0.17  | 1.21 | 0.25 ns  |

|               |                                                                            |        |       |       |       |      |          |
|---------------|----------------------------------------------------------------------------|--------|-------|-------|-------|------|----------|
| Gnl3l         | guanine nucleotide binding protein-like 3 (nucleolar)-like                 | 237107 | 0.36  | 0.41  | 0.73  | 0.49 | -0.32 ns |
| Dck           | deoxycytidine kinase                                                       | 13178  | 2.36  | 2.86  | 3.94  | 0.60 | -0.84 *  |
| Adipor1       | adiponectin receptor 1                                                     | 72674  | 2.57  | 2.09  | 1.82  | 1.41 | 0.76 ns  |
| Fras1         | Fraser syndrome 1 homolog (human)                                          | 231470 | 0.89  | 1.03  | 0.35  | 2.53 | -0.22 ns |
| AW146020      | expressed sequence AW146020                                                | 330361 | 0.43  | 0.34  | 0.35  | 1.20 | 0.75 ns  |
| Bag4          | BCL2-associated athanogene 4                                               | 67384  | 0.51  | 0.49  | 0.44  | 1.14 | 0.60 ns  |
| C330023M02Rik | RIKEN cDNA C330023M02 gene                                                 | 231713 | 0.66  | 0.62  | 0.67  | 0.99 | -0.50 ns |
| Cep27         | centrosomal protein 27                                                     | 66296  | 0.43  | 0.38  | 0.27  | 1.59 | 0.83 *   |
| Zfp322a       | zinc finger protein 322a                                                   | 218100 | 0.66  | 0.53  | 0.60  | 1.11 | 0.13 ns  |
| Atp1b1        | ATPase, Na+/K+ transporting, beta 1 polypeptide                            | 11931  | 12.46 | 11.12 | 9.86  | 1.26 | -0.06 ns |
| Ccdc55        | coiled-coil domain containing 55                                           | 237859 | 0.42  | 0.50  | 0.28  | 1.45 | 0.51 ns  |
| Zdhhc6        | zinc finger, DHHC domain containing 6                                      | 66980  | 2.62  | 2.57  | 2.22  | 1.17 | 0.90 *   |
| BC031748      | CDNA sequence BC031748                                                     | 245622 | 0.61  | 0.82  | 0.99  | 0.61 | -0.11 ns |
| Wipi1         | WD repeat domain, phosphoinositide interacting 1                           | 52639  | 0.33  | 0.33  | 0.40  | 0.81 | 0.04 ns  |
| Polr3f        | polymerase (RNA) III (DNA directed) polypeptide F                          | 70408  | 0.69  | 0.52  | 0.50  | 1.36 | 0.10 ns  |
| 2310035C23Rik | RIKEN cDNA 2310035C23 gene                                                 | 227446 | 1.05  | 1.08  | 0.75  | 1.39 | 0.07 ns  |
| Pfkl          | phosphofructokinase, liver, B-type                                         | 18641  | 9.41  | 8.70  | 8.85  | 1.06 | 0.62 ns  |
| Mthfsd        | methenyltetrahydrofolate synthetase domain containing                      | 234814 | 0.38  | 0.45  | 0.22  | 1.69 | 0.43 ns  |
| Gm962         | gene model 962, (NCBI)                                                     | 381201 | 0.61  | 0.59  | 0.58  | 1.05 | -0.26 ns |
| D630023B12Rik | RIKEN cDNA D630023B12 gene                                                 | 329679 | 1.20  | 1.40  | 1.20  | 1.00 | -0.28 ns |
| Nfatc2        | nuclear factor of activated T-cells, cytoplasmic, calcineurin-dependent 2  | 18019  | 0.72  | 0.66  | 0.63  | 1.14 | -0.06 ns |
| Tnrc6a        | trinucleotide repeat containing 6a                                         | 233833 | 1.57  | 1.20  | 1.33  | 1.18 | 0.68 ns  |
| Prelid1       | PRELI domain containing 1                                                  | 66494  | 8.66  | 8.77  | 10.76 | 0.80 | -0.33 ns |
| Gpr137b       |                                                                            | 83924  | 1.10  | 1.26  | 1.76  | 0.62 | -0.84 *  |
| Rpn1          | ribophorin I                                                               | 103963 | 7.35  | 7.57  | 7.54  | 0.97 | 0.38 ns  |
| Abhd4         | abhydrolase domain containing 4                                            | 105501 | 3.67  | 3.19  | 3.31  | 1.10 | -0.10 ns |
| Adar          | Adenosine deaminase, RNA-specific                                          | 56417  | 0.38  | 0.65  | 0.66  | 0.57 | -0.76 ns |
| Rad51l1       | RAD51-like 1 (S. cerevisiae)                                               | 19363  | 0.45  | 0.76  | 0.69  | 0.65 | 0.02 ns  |
| Slc9a3r2      | solute carrier family 9 (sodium/hydrogen exchanger), isoform 3 regulator 2 | 65962  | 0.34  | 0.45  | 0.25  | 1.32 | 0.55 ns  |
| Timm44        | translocase of inner mitochondrial membrane 44                             | 21856  | 1.60  | 1.79  | 1.94  | 0.82 | 0.13 ns  |
| Cdc20         | cell division cycle 20 homolog (S. cerevisiae)                             | 107995 | 4.78  | 5.17  | 5.82  | 0.82 | -0.08 ns |
| 2310061F22Rik | RIKEN cDNA 2310061F22 gene                                                 | 66965  | 0.96  | 1.34  | 0.75  | 1.27 | 0.43 ns  |
| Bcar1         | breast cancer anti-estrogen resistance 1                                   | 12927  | 1.65  | 1.63  | 0.84  | 1.95 | 0.85 *   |
| Myadm         | myeloid-associated differentiation marker                                  | 50918  | 3.04  | 3.51  | 4.07  | 0.74 | -0.61 ns |
| Ppp2r4        | protein phosphatase 2A, regulatory subunit B (PR 53)                       | 110854 | 1.42  | 1.77  | 1.07  | 1.32 | 0.57 ns  |
| Cntd1         | Cyclin N-terminal domain containing 1                                      | 68107  | 7.00  | 6.75  | 7.88  | 0.88 | 0.12 ns  |
| Slc25a39      | solute carrier family 25, member 39                                        | 68066  | 14.21 | 11.98 | 12.79 | 1.11 | 0.54 ns  |
| Xpo7          | exportin 7                                                                 | 65246  | 2.15  | 2.10  | 2.76  | 0.78 | -0.60 ns |
| Cldn9         | claudin 9                                                                  | 56863  | 2.12  | 1.17  | 0.37  | 5.64 | 0.74 ns  |
| Dtx2          | deltex 2 homolog (Drosophila)                                              | 74198  | 0.62  | 0.74  | 0.65  | 0.95 | -0.08 ns |
| Slc35a2       | solute carrier family 35 (UDP-galactose transporter), member A2            | 22232  | 0.26  | 0.34  | 0.56  | 0.46 | -0.67 ns |
| Incenp        | inner centromere protein                                                   | 16319  | 5.05  | 6.30  | 5.51  | 0.91 | 0.30 ns  |
| EG625193      |                                                                            | 625193 | 2.74  | 3.05  | 2.74  | 1.00 | -0.14 ns |
| Twf2          | twinfilin, actin-binding protein, homolog 2 (Drosophila)                   | 23999  | 0.35  | 0.53  | 0.50  | 0.71 | -0.19 ns |
| Lats2         | large tumor suppressor 2                                                   | 50523  | 0.29  | 0.54  | 0.66  | 0.44 | -0.80 ns |
| Tkt           | transketolase                                                              | 21881  | 13.32 | 12.79 | 12.79 | 1.04 | 0.55 ns  |
| Tmed9         | transmembrane emp24 protein transport domain containing 9                  | 67511  | 2.23  | 2.38  | 3.61  | 0.62 | -0.61 ns |
| A230046K03Rik | RIKEN cDNA A230046K03 gene                                                 | 319277 | 0.73  | 0.71  | 0.42  | 1.74 | 0.42 ns  |
| Rnaseh2c      | ribonuclease H2, subunit C                                                 | 68209  | 2.93  | 2.92  | 2.71  | 1.08 | 0.13 ns  |
| Capza1        | capping protein (actin filament) muscle Z-line, alpha 1                    | 12340  | 4.29  | 5.75  | 5.40  | 0.79 | -0.75 ns |
| LOC634748     |                                                                            | 634748 | 1.54  | 1.96  | 2.67  | 0.57 | -0.76 ns |
| LOC637733     |                                                                            | 637733 | 6.32  | 6.65  | 7.04  | 0.89 | -0.64 ns |
| Tex10         | testis expressed gene 10                                                   | 269536 | 1.76  | 2.16  | 2.54  | 0.69 | -0.87 *  |
| Bud31         | BUD31 homolog (yeast)                                                      | 231889 | 3.76  | 3.79  | 3.70  | 1.01 | 0.00 ns  |
| Dsg2          | desmoglein 2                                                               | 13511  | 3.95  | 4.93  | 4.52  | 0.87 | 0.14 ns  |
| Acot2         | acyl-CoA thioesterase 2                                                    | 171210 | 1.19  | 1.09  | 1.79  | 0.66 | -0.31 ns |
| Zfp608        |                                                                            | 269023 | 0.68  | 0.79  | 0.64  | 1.06 | 0.29 ns  |
| Dot1l         | DOT1-like, histone H3 methyltransferase (S. cerevisiae)                    | 208266 | 0.92  | 0.76  | 0.81  | 1.13 | 0.32 ns  |
| Nr2c1         | nuclear receptor subfamily 2, group C, member 1                            | 22025  | 0.64  | 0.60  | 0.32  | 1.99 | 0.56 ns  |
| 4933407H18Rik | RIKEN cDNA 4933407H18 gene                                                 | 71101  | 0.42  | 0.48  | 0.60  | 0.71 | -0.96 ** |
| Punc          | putative neuronal cell adhesion molecule                                   | 19289  | 0.56  | 0.49  | 0.17  | 3.28 | 0.92 **  |
| 493057319Rik  | RIKEN cDNA 493057319 gene                                                  | 104859 | 0.45  | 0.52  | 0.53  | 0.84 | -0.49 ns |
| Dtl           | denticleless homolog (Drosophila)                                          | 76843  | 0.84  | 0.91  | 0.66  | 1.27 | 0.71 ns  |
| EG668830      |                                                                            | 668830 | 3.75  | 3.97  | 4.06  | 0.92 | 0.20 ns  |
| LOC621832     |                                                                            | 621832 | 3.75  | 3.97  | 4.06  | 0.92 | 0.20 ns  |
| EG432995      | predicted gene, EG432995                                                   | 432995 | 1.86  | 1.41  | 2.47  | 0.75 | -0.19 ns |
| Tmem186       | transmembrane protein 186                                                  | 66690  | 0.44  | 0.48  | 0.45  | 0.97 | 0.13 ns  |
| Uck2          | uridine-cytidine kinase 2                                                  | 80914  | 1.95  | 1.96  | 1.17  | 1.66 | 0.68 ns  |
| Igf2bp2       | insulin-like growth factor 2 mRNA binding protein 2                        | 319765 | 3.07  | 3.06  | 4.50  | 0.68 | -0.63 ns |
| Krt42         | keratin 42                                                                 | 68239  | 0.65  | 0.61  | 0.60  | 1.08 | 0.69 ns  |
| Brwd3         | bromodomain and WD repeat domain containing 3                              | 382236 | 0.23  | 0.25  | 0.45  | 0.51 | -0.57 ns |
| Stk35         | serine/threonine kinase 35                                                 | 67333  | 0.43  | 0.44  | 0.47  | 0.91 | -0.14 ns |
| Heatr5b       |                                                                            | 320473 | 0.55  | 0.46  | 0.46  | 1.19 | 0.66 ns  |
| LOC670614     |                                                                            | 670614 | 0.55  | 0.46  | 0.46  | 1.19 | 0.66 ns  |
| Chm           | choroideremia                                                              | 12662  | 0.53  | 0.53  | 0.84  | 0.63 | -0.61 ns |
| LOC675366     | similar to mitogen activated protein kinase kinase kinase 5                | 675366 | 0.99  | 0.84  | 0.85  | 1.16 | -0.23 ns |
| Tmem170       | transmembrane protein 170                                                  | 66817  | 0.59  | 0.64  | 0.48  | 1.22 | 0.51 ns  |
| Pbx1          | pre B-cell leukemia transcription factor 1                                 | 18514  | 1.50  | 1.64  | 0.99  | 1.50 | 0.10 ns  |
| Kctd7         | potassium channel tetramerisation domain containing 7                      | 212919 | 0.42  | 0.35  | 0.35  | 1.18 | 0.75 ns  |
| Ibrdc1        | IBR domain containing 1                                                    | 268291 | 1.60  | 1.24  | 1.19  | 1.34 | 0.52 ns  |
| Ankrd12       | ankyrin repeat domain 12                                                   | 106585 | 0.62  | 0.60  | 0.30  | 2.08 | 0.74 ns  |
| Zfp760        | zinc finger protein 760                                                    | 240034 | 0.48  | 0.38  | 0.26  | 1.83 | 0.63 ns  |
| Mtap9         | microtubule-associated protein 9                                           | 213582 | 0.34  | 0.50  | 0.23  | 1.42 | 0.01 ns  |
| Psm11         | Proteasome (prosome, macropain) 26S subunit, non-ATPase, 11                | 69077  | 4.55  | 4.22  | 3.23  | 1.40 | 0.66 ns  |
| LOC100045398  | hypothetical protein LOC100045398                                          | #####  | 0.53  | 0.56  | 0.36  | 1.47 | 0.87 *   |
| Ap4e1         | adaptor-related protein complex AP-4, epsilon 1                            | 108011 | 1.19  | 1.10  | 1.17  | 1.02 | 0.39 ns  |

|               |                                                                                          |        |       |       |       |       |          |
|---------------|------------------------------------------------------------------------------------------|--------|-------|-------|-------|-------|----------|
| Nrp           | neural regeneration protein                                                              | 654309 | 0.59  | 0.63  | 0.58  | 1.01  | 0.57 ns  |
| Ppp1r9a       | protein phosphatase 1, regulatory (inhibitor) subunit 9A                                 | 243725 | 0.99  | 1.00  | 0.62  | 1.58  | 0.44 ns  |
| E330016A19Rik | RIKEN cDNA E330016A19 gene                                                               | 214763 | 0.85  | 0.84  | 0.90  | 0.93  | 0.42 ns  |
| Kctd12b       | potassium channel tetramerisation domain containing 12b                                  | 207474 | 0.10  | 0.10  | 0.02  | 5.97  | 0.38 ns  |
| Arl15         | ADP-ribosylation factor-like 15                                                          | 218639 | 1.67  | 2.74  | 2.54  | 0.65  | -0.75 ns |
| Dclre1b       | DNA cross-link repair 1B, PSO2 homolog (S. cerevisiae)                                   | 140917 | 0.38  | 0.36  | 0.30  | 1.26  | 0.25 ns  |
| Ctdspl2       | CTD (carboxy-terminal domain, RNA polymerase II, polypeptide A) small phosphatase like 2 | 329506 | 1.76  | 1.52  | 1.26  | 1.39  | 0.58 ns  |
| Rabep2        | rabaptin, RAB GTPase binding effector protein 2                                          | 70314  | 1.43  | 1.28  | 1.81  | 0.78  | -0.67 ns |
| Zfp771        | zinc finger protein 771                                                                  | 244216 | 0.81  | 0.76  | 0.57  | 1.42  | 0.68 ns  |
| BC059842      | cDNA sequence BC059842                                                                   | 230676 | 0.40  | 0.36  | 0.50  | 0.80  | -0.66 ns |
| Reps1         | RalBP1 associated Eps domain containing protein                                          | 19707  | 1.42  | 1.23  | 1.22  | 1.16  | -0.13 ns |
| Bach1         | BTB and CNC homology 1                                                                   | 12013  | 1.57  | 1.53  | 1.64  | 0.95  | -0.64 ns |
| Eif2ak2       | eukaryotic translation initiation factor 2-alpha kinase 2                                | 19106  | 0.32  | 0.34  | 0.41  | 0.77  | -0.41 ns |
| Mppe1         | metallophosphoesterase 1                                                                 | 225651 | 0.31  | 0.36  | 0.20  | 1.51  | 0.27 ns  |
| Zfp809        | zinc finger protein 809                                                                  | 235047 | 0.85  | 0.97  | 0.62  | 1.38  | 0.78 ns  |
| 2510049J12Rik | RIKEN cDNA 2510049J12 gene                                                               | 70291  | 0.42  | 0.40  | 0.61  | 0.68  | -0.45 ns |
| D630037F22Rik | RIKEN cDNA D630037F22 gene                                                               | 544696 | 0.69  | 0.51  | 0.43  | 1.62  | 0.62 ns  |
| Zfp697        | zinc finger protein 697                                                                  | 242109 | 0.43  | 0.40  | 0.30  | 1.43  | 0.72 ns  |
| Zdhhc23       | zinc finger, DHHC domain containing 23                                                   | 332175 | 0.31  | 0.31  | 0.34  | 0.89  | -0.74 ns |
| 1110038B12Rik | RIKEN cDNA 1110038B12 gene                                                               | 68763  | 3.29  | 2.77  | 1.60  | 2.04  | 0.44 ns  |
| Elovl7        | ELOVL family member 7, elongation of long chain fatty acids (yeast)                      | 74559  | 0.22  | 0.35  | 0.30  | 0.74  | -0.50 ns |
| Dmrt2         | doublesex and mab-3 related transcription factor like family A2                          | 242620 | 0.55  | 0.44  | 0.36  | 1.52  | 0.43 ns  |
| Tmem161b      | Transmembrane protein 161B                                                               | 72745  | 0.46  | 0.63  | 0.52  | 0.88  | -0.02 ns |
| BC021891      | cDNA sequence BC021891                                                                   | 234878 | 1.11  | 0.74  | 0.06  | 17.74 | 0.96 **  |
| Exph5         | exophilin 5                                                                              | 320051 | 0.92  | 0.50  | 0.52  | 1.78  | 0.75 ns  |
| 2700097O09Rik | RIKEN cDNA 2700097O09 gene                                                               | 72658  | 1.58  | 1.72  | 1.74  | 0.90  | 0.13 ns  |
| Rfx3          | Regulatory factor X, 3 (influences HLA class II expression)                              | 19726  | 0.31  | 0.37  | 0.25  | 1.23  | 0.58 ns  |
| Ift122        | intraflagellar transport 122 homolog (Chlamydomonas)                                     | 81896  | 0.95  | 0.93  | 1.03  | 0.92  | -0.65 ns |
| Pi4kb         | Phosphatidylinositol 4-kinase, catalytic, beta polypeptide                               | 107650 | 0.30  | 0.41  | 0.28  | 1.05  | -0.12 ns |
| LOC667106     | Hypothetical protein LOC667106                                                           | 667106 | 0.83  | 0.78  | 0.51  | 1.61  | 0.37 ns  |
| Olfml2a       | Olfactomedin-like 2A                                                                     | 241327 | 0.37  | 0.34  | 0.30  | 1.23  | 0.32 ns  |
| Ipo9          | importin 9                                                                               | 226432 | 2.39  | 2.11  | 1.66  | 1.44  | 0.41 ns  |
| Psma3         | Proteasome (prosome, macropain) subunit, alpha type 3                                    | 19167  | 0.51  | 0.54  | 0.55  | 0.93  | -0.01 ns |
| Aaif          | Apoptosis antagonizing transcription factor                                              | 56321  | 3.08  | 2.87  | 2.25  | 1.36  | 0.31 ns  |
| Rassf1        | Ras association (RalGDS/AF-6) domain family 1                                            | 56289  | 0.96  | 0.82  | 1.08  | 0.88  | -0.04 ns |
| Rnf39         | ring finger protein 39                                                                   | 386454 | 1.04  | 0.88  | 1.02  | 1.01  | 0.18 ns  |
| Zmiz1         | zinc finger, MIZ-type containing 1                                                       | 328365 | 0.37  | 0.44  | 0.31  | 1.16  | 0.04 ns  |
| Akap10        | A kinase (PRKA) anchor protein 10                                                        | 56697  | 0.34  | 0.38  | 0.38  | 0.89  | -0.43 ns |
| 4930534B04Rik | RIKEN cDNA 4930534B04 gene                                                               | 75216  | 0.68  | 0.67  | 0.67  | 1.01  | 0.54 ns  |
| Pkd2          | polycystic kidney disease 2                                                              | 18764  | 3.74  | 3.71  | 2.97  | 1.25  | -0.07 ns |
| Elovl7        | ELOVL family member 7, elongation of long chain fatty acids (yeast)                      | 74559  | 0.96  | 1.05  | 0.80  | 1.20  | 0.03 ns  |
| Grasp         | GRP1 (general receptor for phosphoinositides 1)-associated scaffold protein              | 56149  | 0.93  | 0.93  | 1.25  | 0.74  | -0.57 ns |
| Ccne1         | cyclin E1                                                                                | 12447  | 0.53  | 0.48  | 0.54  | 0.98  | -0.22 ns |
| Tmem40        | transmembrane protein 40                                                                 | 94346  | 0.57  | 0.67  | 0.72  | 0.80  | -0.42 ns |
| Vat1          | Vesicle amine transport protein 1 homolog (T. californica)                               | 26949  | 1.06  | 1.69  | 1.62  | 0.65  | -0.75 ns |
| Abhd14a       | abhydrolase domain containing 14A                                                        | 68644  | 0.38  | 0.42  | 0.34  | 1.13  | 0.64 ns  |
| Zfand3        | zinc finger, AN1-type domain 3                                                           | 21769  | 3.31  | 2.64  | 1.82  | 1.81  | 0.79 ns  |
| Lynx1         | Ly6/neurotoxin 1                                                                         | 23936  | 0.13  | 0.15  | 0.43  | 0.29  | -0.58 ns |
| 1200003C05Rik | RIKEN cDNA 1200003C05 gene                                                               | 104771 | 1.31  | 1.53  | 1.61  | 0.81  | -0.77 ns |
| Prosapip1     | ProSAPIP1 protein                                                                        | 241638 | 0.66  | 0.82  | 0.41  | 1.58  | -0.08 ns |
| Mbd5          | methyl-CpG binding domain protein 5                                                      | 109241 | 0.43  | 0.58  | 0.32  | 1.33  | 0.46 ns  |
| Ppp13e        | Protein phosphatase 1, regulatory (inhibitor) subunit 3E                                 | 105651 | 0.26  | 0.38  | 0.32  | 0.80  | -0.64 ns |
| Nbeal1        | neurobeachin like 1                                                                      | 269198 | 1.19  | 1.26  | 0.73  | 1.62  | -0.05 ns |
| Psmc3ip       | proteasome (prosome, macropain) 26S subunit, ATPase 3, interacting protein               | 19183  | 0.64  | 0.68  | 0.88  | 0.73  | -0.37 ns |
| Prr11         | proline rich 11                                                                          | 270906 | 0.32  | 0.29  | 0.39  | 0.81  | -0.20 ns |
| Cpne5         | copine V                                                                                 | 240058 | 0.57  | 0.55  | 0.47  | 1.21  | 0.56 ns  |
| Lrp8          | low density lipoprotein receptor-related protein 8, apolipoprotein e receptor            | 16975  | 0.14  | 0.20  | 0.43  | 0.34  | -0.92 ** |
| Sulf2         | sulfatase 2                                                                              | 72043  | 1.26  | 1.29  | 1.71  | 0.73  | -0.93 ** |
| Fut8          | Fucosyltransferase 8                                                                     | 53618  | 2.76  | 2.52  | 2.70  | 1.02  | -0.17 ns |
| Ell3          | elongation factor RNA polymerase II-like 3                                               | 269344 | 0.39  | 0.30  | 0.25  | 1.56  | 0.22 ns  |
| Zfp609        | Zinc finger protein 609                                                                  | 214812 | 0.57  | 0.40  | 0.40  | 1.43  | 0.66 ns  |
| Eya4          | eyes absent 4 homolog (Drosophila)                                                       | 14051  | 0.50  | 0.16  | 0.01  | 64.99 | 0.81 *   |
| Tnfrsf23      | tumor necrosis factor receptor superfamily, member 23                                    | 79201  | 0.33  | 0.43  | 2.18  | 0.15  | -0.63 ns |
| Ypel1         | Yippee-like 1 (Drosophila)                                                               | 106369 | 0.38  | 0.32  | 0.31  | 1.22  | 0.78 ns  |
| Pdlim5        | PDZ and LIM domain 5                                                                     | 56376  | 1.95  | 1.79  | 1.28  | 1.51  | -0.06 ns |
| Tbrg4         | transforming growth factor beta regulated gene 4                                         | 21379  | 0.70  | 0.81  | 0.75  | 0.93  | -0.37 ns |
| Rgmb          | RGM domain family, member B                                                              | 68799  | 0.45  | 0.41  | 0.19  | 2.34  | 0.85 *   |
| Rhbdl2        | rhomboid, veinlet-like 2 (Drosophila)                                                    | 230726 | 0.44  | 0.39  | 0.39  | 1.12  | 0.52 ns  |
| Adm2          | adrenomedullin 2                                                                         | 223780 | 0.47  | 0.44  | 0.52  | 0.89  | -0.16 ns |
| Ccdc66        | coiled-coil domain containing 66                                                         | 320234 | 0.56  | 0.63  | 0.54  | 1.04  | 0.36 ns  |
| Magi1         | Membrane associated guanylate kinase, WW and PDZ domain containing 1                     | 14924  | 0.66  | 0.72  | 0.68  | 0.96  | -0.34 ns |
| Polr3b        | polymerase (RNA) III (DNA directed) polypeptide B                                        | 70428  | 0.37  | 0.42  | 0.33  | 1.10  | 0.38 ns  |
| Cog7          | Component of oligomeric golgi complex 7                                                  | 233824 | 0.25  | 0.29  | 0.38  | 0.64  | -0.81 ns |
| Syvn1         | synovial apoptosis inhibitor 1, synoviolin                                               | 74126  | 0.99  | 0.91  | 0.85  | 1.16  | 0.82 *   |
| Fbxo39        | F-box protein 39                                                                         | 628100 | 0.13  | 0.17  | 0.91  | 0.14  | -0.69 ns |
| D3Ert300e     | DNA segment, Chr 3, ERATO Doi 300, expressed                                             | 56790  | 0.50  | 0.50  | 0.30  | 1.67  | 0.72 ns  |
| Sbf2          | SET binding factor 2                                                                     | 319934 | 0.83  | 1.01  | 1.26  | 0.65  | -0.48 ns |
| Lcor          | ligand dependent nuclear receptor corepressor                                            | 212391 | 2.18  | 2.93  | 2.63  | 0.82  | -0.65 ns |
| Cisd1         | CDGSH iron sulfur domain 1                                                               | 52637  | 0.28  | 0.41  | 0.29  | 0.96  | -0.33 ns |
| Wdr48         | WD repeat domain 48                                                                      | 67561  | 1.10  | 0.99  | 0.99  | 1.10  | 0.69 ns  |
| LOC433546     | similar to ribosomal protein L9                                                          | 433546 | 31.08 | 28.19 | 25.53 | 1.21  | 0.76 ns  |
| Urod          | uroporphyrinogen decarboxylase                                                           | 22275  | 1.14  | 1.03  | 1.16  | 0.97  | -0.19 ns |

|               |                                                                              |        |      |      |       |      |          |
|---------------|------------------------------------------------------------------------------|--------|------|------|-------|------|----------|
| Rabep1        | rabaplin, RAB GTPase binding effector protein 1                              | 54189  | 0.41 | 0.46 | 0.42  | 0.95 | 0.12 ns  |
| EG667823      | Predicted gene, EG667823                                                     | 667823 | 0.18 | 0.28 | 0.61  | 0.29 | -0.80 ns |
| Mbtd1         | Mbt domain containing 1                                                      | 103537 | 0.64 | 0.46 | 0.52  | 1.23 | 0.28 ns  |
| Abcc4         | ATP-binding cassette, sub-family C (CFTR/MRP), member 4                      | 239273 | 1.66 | 1.55 | 0.68  | 2.43 | 0.10 ns  |
| Zbtb39        | zinc finger and BTB domain containing 39                                     | 320080 | 0.34 | 0.32 | 0.38  | 0.89 | -0.58 ns |
| Pofut1        | protein O-fucosyltransferase 1                                               | 140484 | 0.51 | 0.55 | 0.45  | 1.13 | 0.04 ns  |
| Tbc1d5        | TBC1 domain family, member 5                                                 | 72238  | 0.61 | 0.55 | 0.32  | 1.92 | 0.65 ns  |
| BC032203      | cDNA sequence BC032203                                                       | 210982 | 0.53 | 0.61 | 0.36  | 1.43 | 0.55 ns  |
| Rad18         | RAD18 homolog (S. cerevisiae)                                                | 58186  | 0.82 | 0.90 | 1.00  | 0.82 | 0.10 ns  |
| 1700094D03Rik | RIKEN cDNA 1700094D03 gene                                                   | 73545  | 0.57 | 0.51 | 0.33  | 1.74 | 0.47 ns  |
| Thoc2         | THO complex 2                                                                | 331401 | 0.81 | 0.77 | 0.80  | 1.00 | 0.06 ns  |
| Dock9         |                                                                              | 105445 | 2.02 | 1.88 | 2.18  | 0.92 | -0.44 ns |
| Jarid1c       | jumonji, AT rich interactive domain 1C (Rbp2 like)                           | 20591  | 0.35 | 0.27 | 0.48  | 0.74 | -0.04 ns |
| Ube2v1        |                                                                              | 66589  | 5.00 | 5.07 | 4.89  | 1.02 | -0.32 ns |
| Myo9a         | Myosin IXa                                                                   | 270163 | 0.64 | 0.53 | 0.42  | 1.52 | 0.63 ns  |
| EG240038      | predicted gene, EG240038                                                     | 240038 | 0.38 | 0.36 | 0.27  | 1.43 | 0.85 *   |
| Herc4         | Hect domain and RLD 4                                                        | 67345  | 0.39 | 0.47 | 0.34  | 1.14 | 0.26 ns  |
| Mettl2        | Methyltransferase like 2                                                     | 52686  | 0.49 | 0.53 | 0.43  | 1.14 | 0.59 ns  |
| Ptbp2         | Polypyrimidine tract binding protein 2                                       | 56195  | 2.16 | 2.56 | 1.16  | 1.85 | 0.58 ns  |
| Scfd1         | Sec1 family domain containing 1                                              | 76983  | 0.32 | 0.38 | 0.25  | 1.30 | 0.12 ns  |
| Usp6nl        | USP6 N-terminal like                                                         | 98910  | 0.92 | 0.97 | 0.51  | 1.80 | 0.65 ns  |
| Col4a4        | procollagen, type IV, alpha 4                                                | 12829  | 1.01 | 1.18 | 0.13  | 7.97 | 0.60 ns  |
| Dtnb          | dystrobrevin, beta                                                           | 13528  | 0.77 | 0.91 | 0.84  | 0.91 | -0.05 ns |
| Vti1a         | Vesicle transport through interaction with t-SNAREs homolog 1A (yeast)       | 53611  | 0.51 | 0.46 | 0.34  | 1.51 | 0.82 *   |
| Pawr          | PRKC, apoptosis, WT1, regulator                                              | 114774 | 0.30 | 0.32 | 0.17  | 1.73 | 0.47 ns  |
| Hdac2         | histone deacetylase 2                                                        | 15182  | 2.80 | 3.06 | 2.78  | 1.00 | 0.30 ns  |
| LOC630474     |                                                                              | 630474 | 0.36 | 0.40 | 0.39  | 0.93 | -0.52 ns |
| LOC638081     |                                                                              | 638081 | 0.36 | 0.40 | 0.39  | 0.93 | -0.52 ns |
| Iifi35        | interferon-induced protein 35                                                | 70110  | 0.93 | 1.19 | 2.98  | 0.31 | -0.73 ns |
| Slc12a5       | solute carrier family 12, member 5                                           | 57138  | 0.39 | 0.34 | 0.31  | 1.27 | 0.62 ns  |
| Lcorl         | Ligand dependent nuclear receptor corepressor-like                           | 209707 | 0.32 | 0.33 | 0.35  | 0.93 | 0.32 ns  |
| Prkca         | Protein kinase C, alpha                                                      | 18750  | 0.33 | 0.32 | 0.34  | 0.98 | 0.30 ns  |
| Dnajc17       |                                                                              | 69408  | 2.25 | 2.25 | 1.97  | 1.14 | -0.10 ns |
| Lias          | lipoic acid synthetase                                                       | 79464  | 1.50 | 1.58 | 1.52  | 0.98 | 0.08 ns  |
| Ssr3          | signal sequence receptor, gamma                                              | 67437  | 6.61 | 6.75 | 6.58  | 1.00 | 0.13 ns  |
| Arl1          | ADP-ribosylation factor-like 1                                               | 104303 | 4.66 | 4.21 | 3.77  | 1.23 | 0.81 ns  |
| 5730508B09Rik | RIKEN cDNA 5730508B09 gene                                                   | 70617  | 2.17 | 2.37 | 1.77  | 1.22 | 0.12 ns  |
| Cryl1         | crystallin, lambda 1                                                         | 68631  | 0.43 | 0.43 | 0.40  | 1.06 | -0.03 ns |
| Psmc1         | Proteasome (prosome, macropain) 26S subunit, non-ATPase, 1                   | 70247  | 0.57 | 0.55 | 0.37  | 1.53 | 0.54 ns  |
| Pcyox1        | prenylcysteine oxidase 1                                                     | 66881  | 3.06 | 3.22 | 2.61  | 1.17 | 0.28 ns  |
| Ep400         | E1A binding protein p400                                                     | 75560  | 1.49 | 1.39 | 1.40  | 1.06 | 0.53 ns  |
| Bub1b         | budding uninhibited by benzimidazoles 1 homolog, beta (S. cerevisiae)        | 12236  | 1.41 | 1.27 | 1.42  | 0.98 | 0.48 ns  |
| Zfp263        | zinc finger protein 263                                                      | 74120  | 0.79 | 0.96 | 1.07  | 0.74 | -0.75 ns |
| Mrps6         | mitochondrial ribosomal protein S6                                           | 121022 | 3.79 | 3.25 | 3.45  | 1.09 | 0.04 ns  |
| Stox2         | storkhead box 2                                                              | 71069  | 0.76 | 0.66 | 0.25  | 2.99 | 0.80 ns  |
| Pbx3          | pre B-cell leukemia transcription factor 3                                   | 18516  | 1.79 | 1.73 | 0.89  | 2.00 | 0.69 ns  |
| Bms1          | BMS1 homolog, ribosome assembly protein (yeast)                              | 213895 | 4.39 | 4.63 | 3.90  | 1.12 | 0.69 ns  |
| Neo1          | neogenin                                                                     | 18007  | 1.23 | 1.15 | 0.82  | 1.49 | 0.89 *   |
| Pde2a         | phosphodiesterase 2A, cGMP-stimulated                                        | 207728 | 0.35 | 0.42 | 0.42  | 0.84 | -0.59 ns |
| Prkaca        | protein kinase, cAMP dependent, catalytic, alpha                             | 18747  | 1.84 | 1.77 | 2.47  | 0.74 | -0.45 ns |
| Tufm          |                                                                              | 233870 | 0.40 | 0.44 | 0.48  | 0.84 | -0.15 ns |
| Plekhh1       | pleckstrin homology domain containing, family H (with MyTH4 domain) member 1 | 211945 | 0.97 | 1.24 | 1.62  | 0.60 | -0.82 *  |
| Oxnad1        | oxidoreductase NAD-binding domain containing 1                               | 218885 | 0.46 | 0.54 | 0.56  | 0.83 | -0.70 ns |
| Polh          | Polymerase (DNA directed), eta (RAD 30 related)                              | 80905  | 0.78 | 0.73 | 0.57  | 1.36 | 0.90 *   |
| Tcn2          | Transcobalamin 2                                                             | 21452  | 0.90 | 0.89 | 1.00  | 0.90 | -0.27 ns |
| Hist2h2be     | histone cluster 2, H2be                                                      | 319190 | 1.79 | 1.79 | 0.99  | 1.80 | 0.26 ns  |
| Fgfr1         | fibroblast growth factor receptor-like 1                                     | 116701 | 0.60 | 0.54 | 0.41  | 1.45 | 0.76 ns  |
| Map1lc3a      | microtubule-associated protein 1 light chain 3 alpha                         | 66734  | 2.74 | 3.00 | 3.67  | 0.74 | -0.69 ns |
| LOC631721     |                                                                              | 631721 | 0.49 | 0.40 | 0.33  | 1.48 | 0.84 *   |
| Vps52         |                                                                              | 224705 | 0.49 | 0.40 | 0.33  | 1.48 | 0.84 *   |
| Pan3          | PAN3 polyA specific ribonuclease subunit homolog (S. cerevisiae)             | 72587  | 0.81 | 0.97 | 1.42  | 0.56 | -0.85 *  |
| Fnta          | farnesyltransferase, CAAX box, alpha                                         | 14272  | 4.42 | 4.52 | 3.97  | 1.11 | 0.82 *   |
| Nup62         | nucleoporin 62                                                               | 18226  | 4.59 | 4.66 | 3.92  | 1.17 | 0.86 *   |
| Selk          | selenoprotein K                                                              | 80795  | 2.54 | 2.32 | 3.01  | 0.84 | -0.30 ns |
| Ntan1         | N-terminal Asn amidase                                                       | 18203  | 2.75 | 2.64 | 2.55  | 1.07 | 0.52 ns  |
| Car5b         | carbonic anhydrase 5b, mitochondrial                                         | 56078  | 0.14 | 0.15 | 0.38  | 0.37 | -0.67 ns |
| Ssh3          | slingshot homolog 3 (Drosophila)                                             | 245857 | 0.48 | 0.50 | 0.40  | 1.19 | 0.11 ns  |
| Whsc111       | Wolf-Hirschhorn syndrome candidate 1-like 1 (human)                          | 234135 | 1.70 | 1.62 | 1.97  | 0.86 | -0.02 ns |
| Fancm         | Fanconi anemia, complementation group M                                      | 104806 | 0.21 | 0.25 | 0.18  | 1.18 | -0.41 ns |
| 2410006H16Rik | RIKEN cDNA 2410006H16 gene                                                   | 69221  | 4.28 | 4.36 | 3.97  | 1.07 | -0.23 ns |
| Yeats2        | YEATS domain containing 2                                                    | 208146 | 0.87 | 0.84 | 0.90  | 0.96 | -0.36 ns |
| Mrpl38        | mitochondrial ribosomal protein L38                                          | 60441  | 0.93 | 0.86 | 1.04  | 0.89 | -0.28 ns |
| Sash1         | SAM and SH3 domain containing 1                                              | 70097  | 1.00 | 1.12 | 1.05  | 0.95 | -0.14 ns |
| Usp24         | ubiquitin specific peptidase 24                                              | 329908 | 0.40 | 0.51 | 0.58  | 0.69 | -0.72 ns |
| Sass6         | spindle assembly 6 homolog (C. elegans)                                      | 72776  | 0.56 | 0.62 | 0.49  | 1.14 | 0.64 ns  |
| Tbc1d24       | TBC1 domain family, member 24                                                | 224617 | 0.83 | 0.77 | 0.76  | 1.09 | 0.40 ns  |
| 4833439L19Rik | RIKEN cDNA 4833439L19 gene                                                   | 97820  | 2.66 | 2.51 | 4.01  | 0.66 | -0.49 ns |
| Wdr61         | WD repeat domain 61                                                          | 66317  | 2.39 | 2.37 | 2.24  | 1.06 | 0.64 ns  |
| Nono          | non-POU-domain-containing, octamer binding protein                           | 53610  | 9.10 | 7.87 | 10.49 | 0.86 | -0.29 ns |
| Aldh6a1       | aldehyde dehydrogenase family 6, subfamily A1                                | 104776 | 0.96 | 0.99 | 0.87  | 1.10 | -0.40 ns |
| Necap1        | NECAP endocytosis associated 1                                               | 67602  | 0.47 | 0.42 | 0.56  | 0.84 | -0.52 ns |
| Serinc1       | serine incorporator 1                                                        | 56442  | 3.23 | 2.76 | 2.29  | 1.41 | 0.79 ns  |
| Ctps2         | cytidine 5'-triphosphate synthase 2                                          | 55936  | 0.85 | 0.64 | 0.84  | 1.00 | 0.40 ns  |
| Cox7c         | cytochrome c oxidase, subunit VIIc                                           | 12867  | 3.46 | 5.15 | 6.89  | 0.50 | -0.88 *  |
| Ctsd          | cathepsin D                                                                  | 13033  | 4.02 | 4.44 | 5.36  | 0.75 | -0.90 *  |
| Wbp2          | WW domain binding protein 2                                                  | 22378  | 1.72 | 1.46 | 1.69  | 1.01 | 0.33 ns  |

|               |                                                                                                |        |       |       |       |       |          |
|---------------|------------------------------------------------------------------------------------------------|--------|-------|-------|-------|-------|----------|
| Tcp1          | t-complex protein 1                                                                            | 21454  | 10.25 | 8.89  | 6.51  | 1.57  | 0.90 *   |
| Gusb          | glucuronidase, beta                                                                            | 110006 | 0.56  | 0.76  | 0.70  | 0.80  | -0.13 ns |
| Ctsa          | cathepsin A                                                                                    | 19025  | 3.19  | 3.01  | 3.62  | 0.88  | -0.70 ns |
| Arpc5         | actin related protein 2/3 complex, subunit 5                                                   | 67771  | 2.96  | 3.42  | 3.08  | 0.96  | -0.41 ns |
| Mfn2          | mitofusin 2                                                                                    | 170731 | 0.38  | 0.43  | 0.46  | 0.83  | -0.63 ns |
| X99384        | cDNA sequence X99384                                                                           | 27355  | 0.64  | 0.83  | 0.63  | 1.02  | 0.35 ns  |
| Atf4          | activating transcription factor 4                                                              | 11911  | 6.92  | 7.06  | 6.19  | 1.11  | 0.48 ns  |
| Aldh2         | aldehyde dehydrogenase 2, mitochondrial                                                        | 11669  | 0.25  | 0.52  | 0.08  | 3.24  | 0.41 ns  |
| Wwp2          | WW domain containing E3 ubiquitin protein ligase 2                                             | 66894  | 0.52  | 0.48  | 0.46  | 1.12  | 0.64 ns  |
| Elavl1        | ELAV (embryonic lethal, abnormal vision, Drosophila)-like 1 (Hu antigen R)                     | 15568  | 2.41  | 2.44  | 2.50  | 0.96  | -0.09 ns |
| Ndrg2         | N-myc downstream regulated gene 2                                                              | 29811  | 0.16  | 0.32  | 0.37  | 0.42  | -0.45 ns |
| Rpl10         | ribosomal protein 10                                                                           | 110954 | 20.06 | 18.07 | 17.67 | 1.13  | 0.82 *   |
| Casp2         | caspase 2                                                                                      | 12366  | 2.25  | 2.09  | 2.37  | 0.94  | 0.07 ns  |
| Psmb1         | proteasome (prosome, macropain) subunit, beta type 1                                           | 19170  | 5.22  | 4.56  | 4.04  | 1.28  | 0.91 *   |
| Ifngr1        | interferon gamma receptor 1                                                                    | 15979  | 0.53  | 0.54  | 0.51  | 1.04  | 0.69 ns  |
| Krt18         | keratin 18                                                                                     | 16668  | 25.71 | 22.32 | 19.13 | 1.34  | 0.82 *   |
| Siah2         | seven in absentia 2                                                                            | 20439  | 0.36  | 0.34  | 0.35  | 1.04  | 0.19 ns  |
| Cul1          | cullin 1                                                                                       | 26965  | 1.33  | 1.45  | 1.68  | 0.79  | -0.88 *  |
| Usmg5         | upregulated during skeletal muscle growth 5                                                    | 66477  | 4.16  | 5.21  | 3.43  | 1.21  | 0.54 ns  |
| Cd24a         | CD24a antigen                                                                                  | 12484  | 18.84 | 16.73 | 15.11 | 1.24  | 0.45 ns  |
| Herpud1       | homocysteine-inducible, endoplasmic reticulum stress-inducible, ubiquitin-like domain member 1 | 64209  | 1.24  | 1.03  | 1.28  | 0.96  | 0.32 ns  |
| Ucp2          | uncoupling protein 2 (mitochondrial, proton carrier)                                           | 22228  | 0.74  | 0.73  | 0.62  | 1.18  | 0.75 ns  |
| Mrp133        | mitochondrial ribosomal protein L33                                                            | 66845  | 0.60  | 0.65  | 1.24  | 0.48  | -0.80 ns |
| Plk1          | polo-like kinase 1 (Drosophila)                                                                | 18817  | 1.03  | 0.90  | 1.18  | 0.86  | 0.12 ns  |
| Prps1         |                                                                                                | 19139  | 0.92  | 1.04  | 1.06  | 0.87  | 0.11 ns  |
| Taf5l         | TAF5-like RNA polymerase II, p300/CBP-associated factor (PCAF)-associated factor               | 102162 | 0.54  | 0.44  | 0.36  | 1.49  | 0.54 ns  |
| Mat2b         | methionine adenosyltransferase II, beta                                                        | 108645 | 1.95  | 1.54  | 2.13  | 0.91  | -0.49 ns |
| Ndufb8        | NADH dehydrogenase (ubiquinone) 1 beta subcomplex 8                                            | 67264  | 4.78  | 5.19  | 2.89  | 1.65  | 0.78 ns  |
| Atp5l         | ATP synthase, H+ transporting, mitochondrial F0 complex, subunit g                             | 27425  | 4.64  | 3.79  | 3.40  | 1.36  | 0.81 ns  |
| Sav1          | salvador homolog 1 (Drosophila)                                                                | 64010  | 2.21  | 1.97  | 2.20  | 1.00  | 0.07 ns  |
| Ccnb1         |                                                                                                | 268697 | 2.05  | 2.91  | 3.19  | 0.64  | -0.36 ns |
| Psma2         | proteasome (prosome, macropain) subunit, alpha type 2                                          | 19166  | 4.50  | 4.85  | 5.44  | 0.82  | -0.27 ns |
| Anxa1         | annexin A1                                                                                     | 16952  | 16.83 | 14.34 | 8.82  | 1.90  | 0.81 ns  |
| Dpp3          | dipeptidylpeptidase 3                                                                          | 75221  | 1.24  | 1.12  | 0.97  | 1.27  | 0.99 *** |
| Ywhaz         | tyrosine 3-monooxygenase/tryptophan 5-monooxygenase activation protein, zeta polypeptide       | 22631  | 13.42 | 11.49 | 12.21 | 1.09  | 0.55 ns  |
| Bat1a         | HLA-B-associated transcript 1A                                                                 | 53817  | 6.92  | 5.88  | 4.79  | 1.44  | 0.82 *   |
| Tfam          | transcription factor A, mitochondrial                                                          | 21780  | 2.20  | 2.03  | 1.76  | 1.24  | -0.02 ns |
| Gpaal1        | GPI anchor attachment protein 1                                                                | 14731  | 0.58  | 0.66  | 0.77  | 0.74  | -0.22 ns |
| Grb7          | growth factor receptor bound protein 7                                                         | 14786  | 1.60  | 1.35  | 1.44  | 1.11  | -0.22 ns |
| Usp10         | ubiquitin specific peptidase 10                                                                | 22224  | 1.47  | 1.63  | 1.09  | 1.34  | 0.50 ns  |
| Tuba1c        |                                                                                                | 22146  | 1.00  | 1.05  | 1.08  | 0.92  | -0.38 ns |
| Pmp           | prion protein                                                                                  | 19122  | 1.28  | 1.13  | 1.77  | 0.72  | -0.12 ns |
| Dnajb6        | DnaJ (Hsp40) homolog, subfamily B, member 6                                                    | 23950  | 2.87  | 2.87  | 3.58  | 0.80  | -0.47 ns |
| EG432959      |                                                                                                | 432959 | 1.18  | 1.40  | 1.87  | 0.63  | -0.95 ** |
| Rdx           | radixin                                                                                        | 19684  | 3.30  | 3.72  | 2.68  | 1.23  | 0.57 ns  |
| 2700060E02Rik | RIKEN cDNA 2700060E02 gene                                                                     | 68045  | 4.99  | 4.86  | 4.59  | 1.08  | 0.02 ns  |
| Mbtps1        | membrane-bound transcription factor peptidase, site 1                                          | 56453  | 1.85  | 1.90  | 1.43  | 1.29  | 0.49 ns  |
| Gm2a          | GM2 ganglioside activator protein                                                              | 14667  | 1.20  | 1.21  | 1.97  | 0.60  | -0.56 ns |
| Napa          | N-ethylmaleimide sensitive fusion protein attachment protein alpha                             | 108124 | 1.18  | 1.00  | 1.41  | 0.84  | -0.31 ns |
| Lypla1        | lysophospholipase 1                                                                            | 18777  | 0.73  | 0.78  | 0.80  | 0.91  | -0.59 ns |
| Rpsa          | ribosomal protein SA                                                                           | 16785  | 22.26 | 21.86 | 15.28 | 1.45  | 0.92 **  |
| Hdac1         | histone deacetylase 1                                                                          | 433759 | 2.22  | 2.41  | 2.86  | 0.77  | -0.89 *  |
| Bcl7b         | B-cell CLL/lymphoma 7B                                                                         | 12054  | 0.47  | 0.47  | 0.56  | 0.83  | -0.07 ns |
| Crk           | v-crk sarcoma virus CT10 oncogene homolog (avian)                                              | 12928  | 3.22  | 2.90  | 2.35  | 1.36  | 0.85 *   |
| Gpd1          | glycerol-3-phosphate dehydrogenase 1 (soluble)                                                 | 14555  | 0.49  | 0.54  | 0.96  | 0.50  | -0.76 ns |
| Eef1b2        | eukaryotic translation elongation factor 1 beta 2                                              | 55949  | 11.53 | 11.92 | 9.42  | 1.22  | 0.33 ns  |
| Spcs1         | signal peptidase complex subunit 1 homolog (S. cerevisiae)                                     | 69019  | 6.48  | 6.67  | 6.17  | 1.05  | 0.25 ns  |
| Cdh1          | cadherin 1                                                                                     | 12550  | 10.11 | 11.01 | 8.19  | 1.23  | 0.03 ns  |
| Psmb2         | proteasome (prosome, macropain) subunit, beta type 2                                           | 26445  | 1.82  | 1.86  | 2.16  | 0.84  | -0.36 ns |
| Cndp2         | CNDP dipeptidase 2 (metallopeptidase M20 family)                                               | 66054  | 1.68  | 3.00  | 3.03  | 0.55  | -0.17 ns |
| Ddx21         | DEAD (Asp-Glu-Ala-Asp) box polypeptide 21                                                      | 56200  | 0.74  | 0.82  | 0.84  | 0.88  | -0.59 ns |
| Gss           | glutathione synthetase                                                                         | 14854  | 0.41  | 0.53  | 0.79  | 0.52  | -0.69 ns |
| Tspan4        | tetraspanin 4                                                                                  | 64540  | 0.67  | 0.68  | 0.67  | 0.99  | -0.35 ns |
| Pold2         | polymerase (DNA directed), delta 2, regulatory subunit                                         | 18972  | 2.09  | 2.01  | 2.75  | 0.75  | -0.50 ns |
| Arpc3         | actin related protein 2/3 complex, subunit 3                                                   | 56378  | 3.48  | 3.49  | 4.97  | 0.70  | -0.77 ns |
| Plrg1         | pleiotropic regulator 1, PRL1 homolog (Arabidopsis)                                            | 53317  | 2.55  | 2.50  | 2.08  | 1.22  | 0.86 *   |
| Ndufc1        | NADH dehydrogenase (ubiquinone) 1, subcomplex unknown, 1                                       | 66377  | 5.54  | 5.63  | 5.03  | 1.10  | 0.06 ns  |
| Hsd17b10      | hydroxysteroid (17-beta) dehydrogenase 10                                                      | 15108  | 1.70  | 1.93  | 2.53  | 0.67  | 0.00 ns  |
| Uqcr          | ubiquinol-cytochrome c reductase (6.4kD) subunit                                               | 66594  | 3.28  | 2.81  | 2.43  | 1.34  | 0.17 ns  |
| Med10         | mediator of RNA polymerase II transcription, subunit 10 homolog (NUT2, S. cerevisiae)          | 28077  | 1.28  | 1.85  | 2.22  | 0.57  | -0.67 ns |
| Tnk2          |                                                                                                | 51789  | 1.14  | 1.07  | 1.47  | 0.77  | -0.69 ns |
| Mgst3         | microsomal glutathione S-transferase 3                                                         | 66447  | 1.86  | 1.87  | 1.40  | 1.32  | 0.83 *   |
| Kctd20        | potassium channel tetramerisation domain containing 20                                         | 66989  | 0.72  | 0.56  | 0.44  | 1.62  | 0.89 *   |
| Rab6          | RAB6, member RAS oncogene family                                                               | 19346  | 2.52  | 2.57  | 3.11  | 0.81  | -0.52 ns |
| Ap3m1         | adaptor-related protein complex 3, mu 1 subunit                                                | 55946  | 0.77  | 0.69  | 0.74  | 1.03  | -0.42 ns |
| Usp5          | ubiquitin specific peptidase 5 (isopeptidase T)                                                | 22225  | 0.81  | 0.99  | 0.96  | 0.84  | -0.11 ns |
| Tpp1          | tripeptidyl peptidase I                                                                        | 12751  | 2.36  | 2.57  | 3.25  | 0.72  | -0.94 ** |
| Cdc2a         | cell division cycle 2 homolog A (S. pombe)                                                     | 12534  | 5.22  | 4.77  | 4.91  | 1.06  | 0.64 ns  |
| Pycr2         | pyrroline-5-carboxylate reductase family, member 2                                             | 69051  | 1.08  | 1.17  | 0.86  | 1.24  | 0.11 ns  |
| Tmem128       | transmembrane protein 128                                                                      | 66309  | 1.63  | 1.62  | 1.66  | 0.98  | -0.61 ns |
| Adfp          | adipose differentiation related protein                                                        | 11520  | 1.97  | 2.02  | 4.91  | 0.40  | -0.45 ns |
| Smoc1         | SPARC related modular calcium binding 1                                                        | 64075  | 0.92  | 0.18  | 0.08  | 11.12 | 0.69 ns  |
| Cox4i1        | cytochrome c oxidase subunit IV isoform 1                                                      | 12857  | 10.92 | 11.02 | 7.68  | 1.42  | 0.80 ns  |

|               |                                                                                                   |        |      |      |       |      |          |
|---------------|---------------------------------------------------------------------------------------------------|--------|------|------|-------|------|----------|
| Myd116        | myeloid differentiation primary response gene 116                                                 | 17872  | 1.08 | 1.09 | 0.89  | 1.21 | -0.12 ns |
| Adprh         | ADP-ribosylarginine hydrolase                                                                     | 11544  | 0.53 | 0.51 | 1.08  | 0.49 | -0.50 ns |
| Drg1          | developmentally regulated GTP binding protein 1                                                   | 13494  | 2.55 | 2.43 | 2.92  | 0.87 | -0.11 ns |
| Tmem30a       | transmembrane protein 30A                                                                         | 69981  | 1.70 | 1.45 | 1.27  | 1.33 | 0.87 *   |
| Nbr1          | neighbor of Brca1 gene 1                                                                          | 17966  | 3.80 | 3.56 | 3.32  | 1.14 | 0.81 ns  |
| Tomm34        | translocase of outer mitochondrial membrane 34                                                    | 67145  | 1.41 | 1.18 | 1.30  | 1.08 | -0.05 ns |
| Caprin1       | cell cycle associated protein 1                                                                   | 53872  | 9.00 | 8.14 | 7.66  | 1.17 | -0.18 ns |
| Asl           | argininosuccinate lyase                                                                           | 109900 | 0.52 | 0.68 | 0.50  | 1.03 | 0.32 ns  |
| Coro1b        | coronin, actin binding protein 1B                                                                 | 23789  | 2.89 | 2.79 | 2.56  | 1.12 | 0.83 *   |
| G6pdx         | glucose-6-phosphate dehydrogenase X-linked                                                        | 14381  | 0.99 | 0.93 | 1.97  | 0.50 | -0.78 ns |
| Prss16        | protease, serine, 16 (thymus)                                                                     | 54373  | 0.41 | 0.51 | 0.60  | 0.69 | -0.43 ns |
| EG666609      |                                                                                                   | 666609 | 8.68 | 9.27 | 8.89  | 0.97 | 0.13 ns  |
| Snrpg         |                                                                                                   | 68011  | 8.68 | 9.27 | 8.89  | 0.97 | 0.13 ns  |
| Angel2        | angel homolog 2 (Drosophila)                                                                      | 52477  | 1.21 | 1.29 | 1.00  | 1.21 | 0.29 ns  |
| Ttc3          | tetratricopeptide repeat domain 3                                                                 | 22129  | 7.49 | 6.71 | 6.54  | 1.14 | 0.49 ns  |
| Dnajc7        | DnaJ (Hsp40) homolog, subfamily C, member 7                                                       | 56354  | 2.12 | 1.93 | 2.16  | 0.98 | 0.37 ns  |
| Yap1          | yes-associated protein 1                                                                          | 22601  | 2.46 | 1.85 | 0.91  | 2.69 | 0.94 **  |
| Exosc7        | exosome component 7                                                                               | 66446  | 0.92 | 1.11 | 1.01  | 0.92 | 0.30 ns  |
| Pola2         | polymerase (DNA directed), alpha 2                                                                | 18969  | 1.80 | 1.95 | 1.30  | 1.37 | 0.85 *   |
| Ulk1          | Unc-51 like kinase 1 (C. elegans)                                                                 | 22241  | 0.83 | 0.63 | 0.83  | 0.99 | -0.39 ns |
| Mrpl18        | mitochondrial ribosomal protein L18                                                               | 67681  | 1.94 | 1.83 | 1.75  | 1.10 | 0.58 ns  |
| Wrnip1        | Werner helicase interacting protein 1                                                             | 78903  | 1.00 | 0.97 | 1.31  | 0.76 | -0.33 ns |
| Pot1a         | protection of telomeres 1A                                                                        | 101185 | 0.63 | 0.69 | 0.76  | 0.82 | -0.45 ns |
| Mmp14         | matrix metalloproteinase 14 (membrane-inserted)                                                   | 17387  | 1.49 | 1.99 | 1.25  | 1.18 | -0.14 ns |
| Slc15a4       | solute carrier family 15, member 4                                                                | 100561 | 0.47 | 0.47 | 0.57  | 0.83 | -0.48 ns |
| Rbx1          | ring-box 1                                                                                        | 56438  | 6.04 | 6.42 | 6.77  | 0.89 | -0.38 ns |
| 1110002B05Rik | RIKEN cDNA 1110002B05 gene                                                                        | 104725 | 4.34 | 4.32 | 4.26  | 1.01 | -0.42 ns |
| Rab9          | RAB9, member RAS oncogene family                                                                  | 56382  | 1.30 | 1.33 | 1.90  | 0.68 | -0.12 ns |
| Cldn7         | claudin 7                                                                                         | 53624  | 7.55 | 7.48 | 7.55  | 1.00 | 0.21 ns  |
| Tmem131       | transmembrane protein 131                                                                         | 56030  | 1.75 | 2.02 | 1.82  | 0.95 | -0.43 ns |
| Tax1bp1       | Tax1 (human T-cell leukemia virus type I) binding protein 1                                       | 52440  | 1.93 | 2.37 | 2.96  | 0.65 | -0.86 *  |
| Smardc2       | SWI/SNF related, matrix associated, actin dependent regulator of chromatin, subfamily d, member 2 | 83796  | 3.15 | 3.71 | 3.36  | 0.93 | 0.34 ns  |
| Tln1          | talin 1                                                                                           | 21894  | 1.24 | 1.25 | 1.46  | 0.84 | -0.28 ns |
| Lars          | leucyl-tRNA synthetase                                                                            | 107045 | 1.48 | 1.96 | 1.64  | 0.90 | 0.15 ns  |
| Eid1          | EP300 interacting inhibitor of differentiation 1                                                  | 58521  | 1.86 | 1.84 | 2.18  | 0.85 | -0.29 ns |
| Ube4b         | ubiquitination factor E4B, UFD2 homolog (S. cerevisiae)                                           | 63958  | 0.65 | 0.58 | 0.80  | 0.81 | -0.55 ns |
| Wfs1          | Wolfram syndrome 1 homolog (human)                                                                | 22393  | 0.73 | 0.78 | 0.36  | 2.05 | 0.47 ns  |
| Tsc22d4       | TSC22 domain family 4                                                                             | 78829  | 1.16 | 1.11 | 1.10  | 1.05 | -0.20 ns |
| 2410016O06Rik | RIKEN cDNA 2410016O06 gene                                                                        | 71952  | 0.70 | 0.81 | 0.90  | 0.77 | -0.49 ns |
| Rad1          | RAD1 homolog (S. pombe)                                                                           | 19355  | 0.65 | 0.55 | 0.75  | 0.86 | -0.19 ns |
| Wdr23         | WD repeat domain 23                                                                               | 28199  | 3.14 | 2.98 | 2.37  | 1.32 | 0.25 ns  |
| Pop4          | processing of precursor 4, ribonuclease P/MRP family, (S. cerevisiae)                             | 66161  | 0.31 | 0.28 | 0.41  | 0.76 | -0.74 ns |
| Tmed4         | transmembrane emp24 protein transport domain containing 4                                         | 103694 | 2.11 | 1.85 | 2.75  | 0.76 | -0.55 ns |
| Ndufa6        | NADH dehydrogenase (ubiquinone) 1 alpha subcomplex, 6 (B14)                                       | 67130  | 4.51 | 4.21 | 4.01  | 1.12 | 0.29 ns  |
| Rnf103        | ring finger protein 103                                                                           | 22644  | 0.95 | 0.88 | 0.93  | 1.02 | -0.38 ns |
| Irf1          | interferon regulatory factor 1                                                                    | 16362  | 0.49 | 0.60 | 0.86  | 0.57 | -0.81 *  |
| Derl2         | Der1-like domain family, member 2                                                                 | 116891 | 1.32 | 1.33 | 1.63  | 0.80 | -0.20 ns |
| Psma3         | proteasome (prosome, macropain) subunit, alpha type 3                                             | 19167  | 8.33 | 8.32 | 8.86  | 0.94 | 0.02 ns  |
| Acp6          | acid phosphatase 6, lysophosphatidic                                                              | 66659  | 0.41 | 0.41 | 0.28  | 1.46 | 0.90 *   |
| Vps28         | vacuolar protein sorting 28 (yeast)                                                               | 66914  | 3.29 | 3.43 | 4.51  | 0.73 | -0.42 ns |
| Chkb          | choline kinase beta                                                                               | 12651  | 1.30 | 1.21 | 0.95  | 1.36 | 0.92 *   |
| Ak2           | adenylate kinase 2                                                                                | 11637  | 1.09 | 1.29 | 1.36  | 0.80 | -0.35 ns |
| Acvr1         | activin A receptor, type 1                                                                        | 11477  | 0.44 | 0.40 | 0.40  | 1.10 | 0.21 ns  |
| Thoc7         | THO complex 7 homolog (Drosophila)                                                                | 66231  | 2.72 | 2.85 | 3.11  | 0.87 | -0.42 ns |
| 4933434E20Rik | RIKEN cDNA 4933434E20 gene                                                                        | 99650  | 4.32 | 3.91 | 2.91  | 1.48 | 0.79 ns  |
| Ykt6          | YKT6 homolog (S. Cerevisiae)                                                                      | 56418  | 2.95 | 2.37 | 3.05  | 0.96 | 0.22 ns  |
| Nipsnap1      | 4-nitrophenylphosphatase domain and non-neuronal SNAP25-like protein homolog 1 (C. elegans)       | 18082  | 0.65 | 0.65 | 0.64  | 1.01 | -0.23 ns |
| Ehbp11        | EH domain binding protein 1-like 1                                                                | 114601 | 0.38 | 0.36 | 0.28  | 1.36 | 0.88 *   |
| Vars          | valyl-tRNA synthetase                                                                             | 22321  | 1.84 | 1.68 | 1.17  | 1.57 | 0.84 *   |
| Nap114        | nucleosome assembly protein 1-like 4                                                              | 17955  | 1.69 | 1.69 | 1.67  | 1.01 | -0.22 ns |
| Psm3          | proteasome (prosome, macropain) 26S subunit, non-ATPase, 3                                        | 22123  | 1.96 | 1.86 | 2.05  | 0.95 | -0.18 ns |
| Nip7          | nuclear import 7 homolog (S. cerevisiae)                                                          | 66164  | 1.31 | 1.42 | 0.97  | 1.34 | 0.69 ns  |
| Ndufb2        | NADH dehydrogenase (ubiquinone) 1 beta subcomplex, 2                                              | 68198  | 2.36 | 2.54 | 2.84  | 0.83 | -0.71 ns |
| Amd1          | S-adenosylmethionine decarboxylase 1                                                              | 11702  | 3.04 | 2.36 | 2.55  | 1.19 | 0.46 ns  |
| Ggt1          | gamma-glutamyltransferase 1                                                                       | 14598  | 0.26 | 0.29 | 0.48  | 0.54 | -0.46 ns |
| Mrps5         | mitochondrial ribosomal protein S5                                                                | 77721  | 0.50 | 0.51 | 0.58  | 0.85 | -0.40 ns |
| Pafah2        | platelet-activating factor acetylhydrolase 2                                                      | 100163 | 0.47 | 0.38 | 0.46  | 1.00 | -0.49 ns |
| Ech1          | enoyl coenzyme A hydratase 1, peroxisomal                                                         | 51798  | 1.60 | 1.80 | 1.79  | 0.89 | -0.60 ns |
| Psm12         | proteasome (prosome, macropain) 26S subunit, non-ATPase, 12                                       | 66997  | 2.44 | 2.31 | 2.85  | 0.85 | 0.03 ns  |
| Paip2         | polyadenylate-binding protein-interacting protein 2                                               | 67869  | 3.52 | 3.58 | 3.48  | 1.01 | 0.57 ns  |
| Tsta3         | tissue specific transplantation antigen P35B                                                      | 22122  | 1.42 | 1.35 | 1.95  | 0.72 | -0.58 ns |
| Ing1          | inhibitor of growth family, member 1                                                              | 26356  | 1.58 | 2.08 | 1.88  | 0.83 | 0.19 ns  |
| Erc3          | excision repair cross-complementing rodent repair deficiency, complementation group 3             | 13872  | 0.45 | 0.44 | 0.50  | 0.90 | 0.24 ns  |
| Rps6ka4       | ribosomal protein S6 kinase, polypeptide 4                                                        | 56613  | 1.29 | 1.21 | 1.01  | 1.27 | 0.86 *   |
| LOC633016     |                                                                                                   | 633016 | 7.58 | 7.60 | 7.75  | 0.97 | -0.95 ** |
| C1d           | nuclear DNA binding protein                                                                       | 57316  | 2.37 | 2.42 | 2.76  | 0.86 | -0.32 ns |
| Efh1          | EF hand domain containing 1                                                                       | 98363  | 1.64 | 1.61 | 2.12  | 0.77 | -0.61 ns |
| Traf3ip2      | Traf3 interacting protein 2                                                                       | 103213 | 0.32 | 0.29 | 0.31  | 1.03 | -0.47 ns |
| Npc2          | Niemann Pick type C2                                                                              | 67963  | 8.47 | 9.23 | 12.11 | 0.70 | -0.50 ns |
| Tsn           | translin                                                                                          | 22099  | 2.26 | 2.52 | 1.70  | 1.33 | 0.44 ns  |
| Timm22        | translocase of inner mitochondrial membrane 22 homolog (yeast)                                    | 56322  | 0.93 | 0.86 | 0.81  | 1.15 | 0.60 ns  |
| Tead2         | TEA domain family member 2                                                                        | 21677  | 0.78 | 0.83 | 0.93  | 0.84 | -0.69 ns |
| Brd7          |                                                                                                   | 26992  | 0.98 | 1.02 | 1.05  | 0.92 | 0.21 ns  |
| LOC634327     |                                                                                                   | 634327 | 0.98 | 1.02 | 1.05  | 0.92 | 0.21 ns  |

|               |                                                                                                             |        |       |       |       |        |          |
|---------------|-------------------------------------------------------------------------------------------------------------|--------|-------|-------|-------|--------|----------|
| Ssr4          | signal sequence receptor, delta                                                                             | 20832  | 1.80  | 1.80  | 2.68  | 0.67   | -0.59 ns |
| Kpnb1         | karyopherin (importin) beta 1                                                                               | 16211  | 3.66  | 3.56  | 4.10  | 0.89   | -0.73 ns |
| Pdcd10        | programmed cell death 10                                                                                    | 56426  | 3.78  | 3.64  | 3.64  | 1.03   | -0.25 ns |
| Thbd          | thrombomodulin                                                                                              | 21824  | 0.14  | 0.21  | 0.33  | 0.42   | -0.48 ns |
| Lmnb2         | lamin B2                                                                                                    | 16907  | 0.31  | 0.41  | 0.26  | 1.22   | 0.19 ns  |
| Tbcb          | tubulin folding cofactor B                                                                                  | 66411  | 2.05  | 2.37  | 2.32  | 0.88   | -0.40 ns |
| Lsm3          | LSM3 homolog, U6 small nuclear RNA associated (S. cerevisiae)                                               | 67678  | 2.92  | 3.03  | 3.31  | 0.88   | -0.06 ns |
| Ttc1          | tetratricopeptide repeat domain 1                                                                           | 66827  | 1.17  | 1.14  | 1.17  | 0.99   | 0.03 ns  |
| LOC638521     |                                                                                                             | 638521 | 1.06  | 1.18  | 1.39  | 0.76   | -0.59 ns |
| Bccip         | BRCA2 and CDKN1A interacting protein                                                                        | 66165  | 1.01  | 1.09  | 1.02  | 0.98   | -0.01 ns |
| Slmo2         | slowmo homolog 2 (Drosophila)                                                                               | 66390  | 0.99  | 1.11  | 1.36  | 0.73   | -0.62 ns |
| Rassf3        | Ras association (RalGDS/AF-6) domain family 3                                                               | 192678 | 0.93  | 0.90  | 0.86  | 1.07   | -0.39 ns |
| Tulp4         | tubby like protein 4                                                                                        | 68842  | 1.71  | 1.16  | 0.81  | 2.09   | 0.66 ns  |
| Dpagt1        | dolichyl-phosphate (UDP-N-acetylglucosamine) acetylglucosaminophosphotransferase 1 (GlcNAc-1-P transferase) | 13478  | 0.51  | 0.59  | 0.47  | 1.07   | 0.59 ns  |
| Lbp           | lipopolysaccharide binding protein                                                                          | 16803  | 0.57  | 0.73  | 1.08  | 0.52   | -0.81 ns |
| Pla2g4a       | phospholipase A2, group IVA (cytosolic, calcium-dependent)                                                  | 18783  | 1.15  | 0.87  | 0.74  | 1.54   | -0.14 ns |
| Flot1         | flotillin 1                                                                                                 | 14251  | 0.73  | 0.61  | 0.39  | 1.84   | 0.82 *   |
| Cib1          | calcium and integrin binding 1 (calmyrin)                                                                   | 23991  | 0.65  | 0.69  | 1.15  | 0.57   | -0.78 ns |
| Ppp1r11       | protein phosphatase 1, regulatory (inhibitor) subunit 11                                                    | 76497  | 1.53  | 1.23  | 1.18  | 1.29   | 0.89 *   |
| Tmem115       | transmembrane protein 115                                                                                   | 56395  | 0.46  | 0.38  | 0.38  | 1.20   | 0.66 ns  |
| Slc20a1       | solute carrier family 20, member 1                                                                          | 20515  | 0.76  | 1.03  | 1.71  | 0.44   | -0.64 ns |
| Cd8b1         | CD8 antigen, beta chain 1                                                                                   | 12526  | 2.21  | 2.16  | 2.12  | 1.04   | 0.38 ns  |
| Gmfb          | glia maturation factor, beta                                                                                | 63985  | 2.56  | 2.66  | 2.42  | 1.05   | 0.06 ns  |
| Pafah1b1      | platelet-activating factor acetylhydrolase, isoform 1b, beta1 subunit                                       | 18472  | 1.82  | 1.61  | 1.91  | 0.95   | -0.14 ns |
| Glg1          | golgi apparatus protein 1                                                                                   | 20340  | 2.65  | 2.86  | 1.84  | 1.44   | 0.54 ns  |
| Ctnnb1        | catenin, beta like 1                                                                                        | 66642  | 1.44  | 1.45  | 1.28  | 1.12   | 0.58 ns  |
| AA960436      | expressed sequence AA960436                                                                                 | 101985 | 0.42  | 0.39  | 0.40  | 1.03   | 0.16 ns  |
| Rsrc1         | arginine/serine-rich coiled-coil 1                                                                          | 66880  | 0.90  | 0.84  | 0.88  | 1.01   | 0.48 ns  |
| Gtf2h4        | general transcription factor II H, polypeptide 4                                                            | 14885  | 1.11  | 1.08  | 0.84  | 1.31   | 0.85 *   |
| Hspa14        | heat shock protein 14                                                                                       | 50497  | 1.56  | 1.55  | 1.49  | 1.05   | 0.30 ns  |
| Tbc1d10a      | TBC1 domain family, member 10a                                                                              | 103724 | 0.76  | 0.88  | 1.08  | 0.70   | -0.72 ns |
| Ndufb5        | NADH dehydrogenase (ubiquinone) 1 beta subcomplex, 5                                                        | 66046  | 4.26  | 3.55  | 3.25  | 1.31   | 0.58 ns  |
| Crtap         | cartilage associated protein                                                                                | 56693  | 0.71  | 0.92  | 0.69  | 1.02   | 0.22 ns  |
| Bex1          | brain expressed gene 1                                                                                      | 19716  | 14.23 | 17.14 | 17.93 | 0.79   | 0.07 ns  |
| Cstf1         | cleavage stimulation factor, 3' pre-RNA, subunit 1                                                          | 67337  | 0.86  | 0.77  | 0.77  | 1.11   | -0.12 ns |
| Sod2          | superoxide dismutase 2, mitochondrial                                                                       | 20656  | 1.87  | 1.59  | 1.22  | 1.52   | 0.67 ns  |
| Wwc2          | WW, C2 and coiled-coil domain containing 2                                                                  | 52357  | 3.11  | 2.89  | 1.41  | 2.20   | 0.94 **  |
| Sfn           | stratifin                                                                                                   | 55948  | 0.45  | 0.51  | 0.46  | 0.97   | 0.41 ns  |
| Ecm1          | extracellular matrix protein 1                                                                              | 13601  | 0.23  | 0.30  | 0.67  | 0.34   | -0.55 ns |
| Ccs           | copper chaperone for superoxide dismutase                                                                   | 12460  | 0.95  | 0.83  | 0.50  | 1.87   | 0.98 *** |
| Dhcr7         | 7-dehydrocholesterol reductase                                                                              | 13360  | 0.42  | 0.41  | 0.55  | 0.76   | -0.85 *  |
| Smpd1         | sphingomyelin phosphodiesterase 1, acid lysosomal                                                           | 20597  | 0.78  | 0.68  | 0.65  | 1.19   | 0.48 ns  |
| Lsm4          | LSM4 homolog, U6 small nuclear RNA associated (S. cerevisiae)                                               | 50783  | 2.33  | 2.44  | 2.20  | 1.06   | 0.65 ns  |
| Tmem123       | transmembrane protein 123                                                                                   | 71929  | 1.45  | 1.39  | 0.54  | 2.65   | 0.73 ns  |
| Golga2        | golgi autoantigen, golgin subfamily a, 2                                                                    | 99412  | 0.94  | 1.11  | 1.05  | 0.89   | -0.36 ns |
| Cdk5rap1      | CDK5 regulatory subunit associated protein 1                                                                | 66971  | 1.14  | 1.04  | 1.34  | 0.84   | -0.29 ns |
| Pbk           | PDZ binding kinase                                                                                          | 52033  | 2.85  | 3.10  | 4.00  | 0.71   | 0.01 ns  |
| Hps4          | Hermansky-Pudlak syndrome 4 homolog (human)                                                                 | 192232 | 0.51  | 0.52  | 0.58  | 0.87   | -0.38 ns |
| Sdhc          | succinate dehydrogenase complex, subunit C, integral membrane protein                                       | 66052  | 2.34  | 2.08  | 1.94  | 1.20   | 0.04 ns  |
| Psmb10        | proteasome (prosome, macropain) subunit, beta type 10                                                       | 19171  | 0.18  | 0.30  | 0.42  | 0.42   | -0.77 ns |
| Prpf31        | PRP31 pre-mRNA processing factor 31 homolog (yeast)                                                         | 68988  | 0.38  | 0.49  | 0.57  | 0.66   | -0.75 ns |
| Ralbp1        | ralA binding protein 1                                                                                      | 19765  | 1.80  | 1.52  | 1.11  | 1.61   | 0.93 **  |
| Smc2          | structural maintenance of chromosomes 2                                                                     | 14211  | 2.74  | 2.91  | 3.69  | 0.74   | -0.52 ns |
| Med25         | mediator of RNA polymerase II transcription, subunit 25 homolog (yeast)                                     | 75613  | 0.51  | 0.36  | 0.44  | 1.16   | 0.58 ns  |
| Mtbp          | Mdm2, transformed 3T3 cell double minute p53 binding protein                                                | 105837 | 0.66  | 0.57  | 0.72  | 0.91   | -0.33 ns |
| Spata5        | spermatogenesis associated 5                                                                                | 57815  | 0.65  | 0.69  | 0.49  | 1.33   | 0.24 ns  |
| Mbt1          | mbt domain containing 1                                                                                     | 103537 | 2.49  | 2.25  | 2.20  | 1.13   | 0.35 ns  |
| Pcbp1         | poly(rC) binding protein 1                                                                                  | 23983  | 9.56  | 9.27  | 10.73 | 0.89   | -0.39 ns |
| Ssna1         | Sjogren's syndrome nuclear autoantigen 1                                                                    | 68475  | 1.63  | 1.72  | 1.48  | 1.10   | -0.08 ns |
| Pef1          | penta-EF hand domain containing 1                                                                           | 67898  | 0.56  | 0.47  | 0.71  | 0.78   | -0.22 ns |
| Msl31         | male-specific lethal-3 homolog 1 (Drosophila)                                                               | 17692  | 1.16  | 1.32  | 1.62  | 0.71   | 0.07 ns  |
| Wdr12         | WD repeat domain 12                                                                                         | 57750  | 0.59  | 0.52  | 0.37  | 1.58   | 0.35 ns  |
| Man2a1        | mannosidase 2, alpha 1                                                                                      | 17158  | 0.17  | 0.51  | 0.15  | 1.19   | 0.43 ns  |
| Pole          | polymerase (DNA directed), epsilon                                                                          | 18973  | 1.59  | 1.69  | 1.72  | 0.92   | 0.28 ns  |
| Nudt5         | nudix (nucleoside diphosphate linked moiety X)-type motif 5                                                 | 53893  | 1.19  | 1.12  | 0.93  | 1.27   | 0.08 ns  |
| Ifi88         | intraflagellar transport 88 homolog (Chlamydomonas)                                                         | 21821  | 0.37  | 0.40  | 0.29  | 1.26   | 0.24 ns  |
| Eed           | embryonic ectoderm development                                                                              | 13626  | 1.32  | 1.38  | 1.66  | 0.80   | -0.82 *  |
| Lrp1          | low density lipoprotein receptor-related protein 1                                                          | 16971  | 0.36  | 0.45  | 0.24  | 1.47   | 0.12 ns  |
| Cacnb3        | calcium channel, voltage-dependent, beta 3 subunit                                                          | 12297  | 1.04  | 1.00  | 1.30  | 0.79   | -0.80 ns |
| Sart1         | squamous cell carcinoma antigen recognized by T-cells 1                                                     | 20227  | 1.02  | 1.00  | 0.72  | 1.41   | 0.92 **  |
| Casp7         | caspase 7                                                                                                   | 12369  | 0.41  | 0.76  | 0.95  | 0.43   | -0.56 ns |
| Arhgdg        | Rho GDP dissociation inhibitor (GDI) gamma                                                                  | 14570  | 1.01  | 0.93  | 0.56  | 1.79   | 0.84 *   |
| Plcb3         | phospholipase C, beta 3                                                                                     | 18797  | 1.42  | 1.50  | 0.88  | 1.61   | 0.81 *   |
| Mvd           | mevalonate (diphospho) decarboxylase                                                                        | 192156 | 0.39  | 0.45  | 0.31  | 1.27   | 0.58 ns  |
| Dmd           | dystrophin, muscular dystrophy                                                                              | 13405  | 0.36  | 0.33  | 0.09  | 4.16   | 0.37 ns  |
| Tob2          | transducer of ERBB2, 2                                                                                      | 57259  | 0.99  | 1.15  | 1.01  | 0.97   | 0.40 ns  |
| Ube2e3        | ubiquitin-conjugating enzyme E2E 3, UBC4/5 homolog (yeast)                                                  | 22193  | 5.06  | 4.31  | 2.79  | 1.80   | 0.57 ns  |
| Pvrl3         | poliovirus receptor-related 3                                                                               | 58998  | 1.01  | 0.33  | 0.01  | 129.91 | 0.69 ns  |
| Rnf25         | ring finger protein 25                                                                                      | 57751  | 0.47  | 0.48  | 0.39  | 1.20   | 0.20 ns  |
| Cox4nb        | COX4 neighbor                                                                                               | 18117  | 1.03  | 1.10  | 0.67  | 1.53   | 0.82 *   |
| Ppp1r2        | protein phosphatase 1, regulatory (inhibitor) subunit 2                                                     | 66849  | 2.90  | 2.80  | 2.63  | 1.10   | 0.35 ns  |
| 2900010M23Rik | RIKEN cDNA 2900010M23 gene                                                                                  | 67267  | 3.36  | 3.25  | 2.27  | 1.47   | 0.96 **  |
| Podxl         | podocalyxin-like                                                                                            | 27205  | 0.72  | 0.91  | 0.82  | 0.88   | -0.51 ns |
| Kcnk1         | potassium channel, subfamily K, member 1                                                                    | 16525  | 5.56  | 3.32  | 2.33  | 2.37   | 0.90 *   |
| Ubqln4        | ubiquilin 4                                                                                                 | 94232  | 2.10  | 2.62  | 1.75  | 1.20   | 0.14 ns  |
| Rpl36al       | ribosomal protein L36a-like                                                                                 | 66483  | 12.98 | 12.47 | 13.15 | 0.98   | -0.16 ns |

|           |                                                                           |        |       |       |       |       |          |
|-----------|---------------------------------------------------------------------------|--------|-------|-------|-------|-------|----------|
| Mrpl54    | mitochondrial ribosomal protein L54                                       | 66047  | 0.92  | 0.83  | 0.80  | 1.13  | -0.08 ns |
| Krit1     | KRIT1, ankyrin repeat containing                                          | 79264  | 0.39  | 0.46  | 0.50  | 0.78  | -0.92 *  |
| Ier3ip1   | immediate early response 3 interacting protein 1                          | 66191  | 0.88  | 1.14  | 1.12  | 0.78  | -0.27 ns |
| Lsm8      | LSM8 homolog, U6 small nuclear RNA associated (S. cerevisiae)             | 76522  | 3.08  | 3.48  | 4.20  | 0.73  | -0.44 ns |
| H47       | histocompatibility 47                                                     | 109815 | 0.87  | 0.87  | 0.93  | 0.93  | -0.32 ns |
| Zbtb22    | zinc finger and BTB domain containing 22                                  | 81630  | 1.44  | 1.12  | 0.87  | 1.64  | 0.85 *   |
| Ttrap     | Traf and Tnf receptor associated protein                                  | 56196  | 2.44  | 2.12  | 2.87  | 0.85  | -0.36 ns |
| Taf13     | TAF13 RNA polymerase II, TATA box binding protein (TBP)-associated factor | 99730  | 1.24  | 1.34  | 1.10  | 1.12  | 0.67 ns  |
| Arid1a    |                                                                           | 93760  | 2.21  | 1.96  | 2.34  | 0.94  | -0.60 ns |
| LOC675933 |                                                                           | 675933 | 2.21  | 1.96  | 2.34  | 0.94  | -0.60 ns |
| Mcm3ap    | minichromosome maintenance deficient 3 (S. cerevisiae) associated protein | 54387  | 0.94  | 0.85  | 0.90  | 1.04  | -0.23 ns |
| Ccrn4l    |                                                                           | 12457  | 21.00 | 19.21 | 17.52 | 1.19  | 0.81 *   |
| Cog6      |                                                                           | 67542  | 21.00 | 19.21 | 17.52 | 1.19  | 0.81 *   |
| Sgip1     |                                                                           | 73094  | 21.00 | 19.21 | 17.52 | 1.19  | 0.81 *   |
| Gcdh      | glutaryl-Coenzyme A dehydrogenase                                         | 270076 | 0.31  | 0.42  | 0.24  | 1.31  | 0.55 ns  |
| Lrrc40    | leucine rich repeat containing 40                                         | 67144  | 1.67  | 1.98  | 1.56  | 1.06  | 0.07 ns  |
| Cish      | cytokine inducible SH2-containing protein                                 | 12700  | 0.25  | 0.31  | 0.39  | 0.63  | -0.29 ns |
| Parg      | poly (ADP-ribose) glycohydrolase                                          | 26430  | 1.08  | 1.10  | 1.19  | 0.91  | -0.52 ns |
| Sept4     | septin 4                                                                  | 18952  | 1.06  | 0.73  | 1.20  | 0.88  | -0.06 ns |
| Hprt1     | hypoxanthine guanine phosphoribosyl transferase 1                         | 15452  | 2.19  | 2.33  | 5.32  | 0.41  | -0.69 ns |
| Ssx2ip    | synovial sarcoma, X breakpoint 2 interacting protein                      | 99167  | 0.62  | 0.74  | 0.65  | 0.95  | -0.23 ns |
| Galns     | galactosamine (N-acetyl)-6-sulfate sulfatase                              | 50917  | 0.36  | 0.36  | 0.26  | 1.39  | 0.21 ns  |
| Nbn       | nibrin                                                                    | 27354  | 0.43  | 0.34  | 0.45  | 0.94  | -0.38 ns |
| Car2      | carbonic anhydrase 2                                                      | 12349  | 2.72  | 2.44  | 2.05  | 1.32  | -0.30 ns |
| Pml       | promyelocytic leukemia                                                    | 18854  | 0.48  | 0.38  | 0.42  | 1.14  | 0.63 ns  |
| Nrf2      |                                                                           | 641340 | 0.70  | 0.68  | 0.73  | 0.95  | -0.60 ns |
| Zfp68     | zinc finger protein 68                                                    | 24135  | 0.87  | 1.04  | 1.08  | 0.81  | -0.86 *  |
| Copg2     | coatamer protein complex, subunit gamma 2                                 | 54160  | 1.01  | 0.84  | 1.26  | 0.80  | -0.64 ns |
| Rad17     | RAD17 homolog (S. pombe)                                                  | 19356  | 0.78  | 1.01  | 1.46  | 0.53  | -0.74 ns |
| Atad1     | ATPase family, AAA domain containing 1                                    | 67979  | 1.21  | 1.25  | 1.21  | 1.00  | -0.07 ns |
| Slc35b1   | solute carrier family 35, member B1                                       | 110172 | 1.37  | 1.34  | 1.44  | 0.95  | -0.18 ns |
| Atpif1    | ATPase inhibitory factor 1                                                | 11983  | 3.43  | 3.67  | 4.83  | 0.71  | -0.73 ns |
| Fth1      | ferritin heavy chain 1                                                    | 14319  | 12.05 | 12.49 | 11.42 | 1.05  | 0.42 ns  |
| Ube2a     | ubiquitin-conjugating enzyme E2A, RAD6 homolog (S. cerevisiae)            | 22209  | 1.30  | 1.32  | 2.72  | 0.47  | -0.59 ns |
| Stoml2    | stomatin (Epb7.2)-like 2                                                  | 66592  | 1.07  | 1.19  | 1.25  | 0.85  | -0.14 ns |
| Mcm5      | minichromosome maintenance deficient 2 mitotin (S. cerevisiae)            | 17216  | 3.83  | 3.65  | 4.13  | 0.92  | -0.52 ns |
| Sfrs4     | splicing factor, arginine/serine-rich 4 (SRp75)                           | 57317  | 1.93  | 1.85  | 2.21  | 0.87  | -0.17 ns |
| Ciz1      | CDKN1A interacting zinc finger protein 1                                  | 68379  | 0.96  | 0.91  | 0.72  | 1.32  | 0.16 ns  |
| Taf10     | TAF10 RNA polymerase II, TATA box binding protein (TBP)-associated factor | 24075  | 2.87  | 2.64  | 3.64  | 0.78  | -0.42 ns |
| Moap1     | modulator of apoptosis 1                                                  | 64113  | 1.12  | 1.09  | 1.36  | 0.82  | -0.38 ns |
| Snx5      | sorting nexin 5                                                           | 69178  | 3.28  | 3.23  | 3.76  | 0.87  | -0.37 ns |
| Elk3      | ELK3, member of ETS oncogene family                                       | 13713  | 1.27  | 1.26  | 0.82  | 1.55  | 0.28 ns  |
| Mrps12    | mitochondrial ribosomal protein S12                                       | 24030  | 0.91  | 0.96  | 1.04  | 0.87  | -0.33 ns |
| Nufip1    | nuclear fragile X mental retardation protein interacting protein 1        | 27275  | 0.74  | 0.67  | 0.83  | 0.90  | -0.24 ns |
| Nme2      | expressed in non-metastatic cells 2, protein                              | 18103  | 12.51 | 10.01 | 8.98  | 1.39  | 0.38 ns  |
| Cse1l     | chromosome segregation 1-like (S. cerevisiae)                             | 110750 | 3.56  | 3.81  | 4.31  | 0.82  | -0.77 ns |
| Mrpl2     | mitochondrial ribosomal protein L2                                        | 27398  | 1.90  | 1.56  | 1.12  | 1.68  | 0.94 **  |
| Hpcal1    | hippocalcin-like 1                                                        | 53602  | 3.29  | 3.11  | 4.61  | 0.71  | -0.63 ns |
| Psbm6     | proteasome (prosome, macropain) subunit, beta type 6                      | 19175  | 3.72  | 3.66  | 4.21  | 0.88  | -0.19 ns |
| Pdk2      | pyruvate dehydrogenase kinase, isoenzyme 2                                | 18604  | 0.38  | 0.22  | 0.16  | 2.34  | 0.37 ns  |
| Smc6      | structural maintenance of chromosomes 6                                   | 67241  | 2.30  | 2.49  | 2.81  | 0.81  | -0.43 ns |
| Dusp1     | dual specificity phosphatase 1                                            | 19252  | 1.36  | 1.14  | 0.66  | 2.04  | 0.37 ns  |
| Angpt2    | angiopoietin 2                                                            | 11601  | 2.44  | 1.24  | 0.21  | 11.33 | 0.40 ns  |
| E2f6      | E2F transcription factor 6                                                | 50496  | 0.41  | 0.51  | 0.60  | 0.68  | -0.66 ns |
| Topors    | topoisomerase I binding, arginine/serine-rich                             | 106021 | 1.38  | 1.93  | 2.05  | 0.67  | -0.46 ns |
| LOC670211 |                                                                           | 670211 | 14.46 | 13.16 | 10.51 | 1.37  | 0.97 **  |
| Tor1b     | torsin family 1, member B                                                 | 30934  | 1.48  | 1.49  | 1.03  | 1.44  | 0.62 ns  |
| Mrpl40    | mitochondrial ribosomal protein L40                                       | 18100  | 1.66  | 1.39  | 1.88  | 0.88  | -0.45 ns |
| Synj2bp   | synaptojanin 2 binding protein                                            | 24071  | 2.66  | 2.61  | 2.56  | 1.03  | -0.21 ns |
| MsrA      | methionine sulfoxide reductase A                                          | 110265 | 0.22  | 0.27  | 0.26  | 0.84  | 0.35 ns  |
| Zdhhc12   | zinc finger, DHHC domain containing 12                                    | 66220  | 0.28  | 0.31  | 0.42  | 0.66  | -0.79 ns |
| Traf5     | Tnf receptor-associated factor 5                                          | 22033  | 0.47  | 0.41  | 0.30  | 1.55  | 0.92 **  |
| Tnfaip1   | tumor necrosis factor, alpha-induced protein 1 (endothelial)              | 21927  | 2.62  | 2.57  | 1.88  | 1.38  | 0.74 ns  |
| Snrk      | SNF related kinase                                                        | 20623  | 0.68  | 0.69  | 0.93  | 0.73  | -0.22 ns |
| Senp3     | SUMO/sentrin specific peptidase 3                                         | 80886  | 2.01  | 2.22  | 2.24  | 0.89  | -0.17 ns |
| Tmem9b    | TMEM9 domain family, member B                                             | 56786  | 1.09  | 1.05  | 1.41  | 0.77  | -0.67 ns |
| Scand1    | SCAN domain-containing 1                                                  | 19018  | 2.00  | 1.99  | 2.32  | 0.86  | -0.41 ns |
| Mrps16    | mitochondrial ribosomal protein S16                                       | 66242  | 1.53  | 1.50  | 1.48  | 1.03  | -0.19 ns |
| Mapk13    | mitogen activated protein kinase 13                                       | 26415  | 1.69  | 1.78  | 1.23  | 1.37  | 0.70 ns  |
| Ocln      | occludin                                                                  | 18260  | 1.66  | 1.84  | 2.33  | 0.71  | -0.90 *  |
| Sh2b1     | SH2B adaptor protein 1                                                    | 20399  | 0.47  | 0.36  | 0.45  | 1.05  | 0.15 ns  |
| Zhx1      | zinc fingers and homeoboxes protein 1                                     | 22770  | 1.74  | 1.44  | 1.45  | 1.20  | 0.26 ns  |
| Mxd3      | Max dimerization protein 3                                                | 17121  | 0.58  | 0.56  | 0.53  | 1.09  | 0.57 ns  |
| Ube2l3    | ubiquitin-conjugating enzyme E2L 3                                        | 22195  | 4.32  | 3.64  | 4.83  | 0.89  | -0.46 ns |
| Tmem93    | transmembrane protein 93                                                  | 66048  | 1.20  | 1.26  | 1.38  | 0.86  | -0.80 ns |
| Lgmn      | legumain                                                                  | 19141  | 1.48  | 1.58  | 2.26  | 0.65  | -0.87 *  |
| Gtf2e2    | general transcription factor II E, polypeptide 2 (beta subunit)           | 68153  | 1.65  | 1.78  | 2.66  | 0.62  | -0.65 ns |
| Gata3     | GATA binding protein 3                                                    | 14462  | 2.84  | 2.81  | 1.60  | 1.76  | 0.53 ns  |
| Klf2      | Kruppel-like factor 2 (lung)                                              | 16598  | 0.32  | 0.27  | 0.11  | 2.89  | 0.60 ns  |
| Dock7     | dedicator of cytokinesis 7                                                | 67299  | 2.85  | 2.58  | 2.16  | 1.31  | 0.29 ns  |
| Ncor2     | nuclear receptor co-repressor 2                                           | 20602  | 1.15  | 0.99  | 0.97  | 1.17  | 0.44 ns  |
| Akr1b8    | aldo-keto reductase family 1, member B8                                   | 14187  | 0.17  | 0.23  | 0.78  | 0.22  | -0.32 ns |
| Pigf      | phosphatidylinositol glycan anchor biosynthesis, class F                  | 18701  | 1.49  | 1.25  | 1.09  | 1.36  | 0.95 **  |
| Nme3      | expressed in non-metastatic cells 3                                       | 79059  | 0.76  | 0.75  | 0.55  | 1.37  | 0.05 ns  |



|               |                                                                                                   |        |       |       |       |      |           |
|---------------|---------------------------------------------------------------------------------------------------|--------|-------|-------|-------|------|-----------|
| Cdh16         | cadherin 16                                                                                       | 12556  | 12.06 | 11.37 | 10.20 | 1.18 | 0.46 ns   |
| Thop1         | thimet oligopeptidase 1                                                                           | 50492  | 0.95  | 0.90  | 0.65  | 1.45 | 0.58 ns   |
| Mrpl39        | mitochondrial ribosomal protein L39                                                               | 27393  | 3.97  | 3.54  | 4.38  | 0.90 | -0.67 ns  |
| Smarcd1       | SWI/SNF related, matrix associated, actin dependent regulator of chromatin, subfamily d, member 1 | 83797  | 0.51  | 0.46  | 0.35  | 1.47 | 0.85 *    |
| Mafg          | v-maf musculoaponeurotic fibrosarcoma oncogene family, protein G (avian)                          | 17134  | 0.69  | 0.65  | 0.77  | 0.90 | 0.15 ns   |
| Mrps9         | mitochondrial ribosomal protein S9                                                                | 69527  | 0.55  | 0.52  | 0.54  | 1.02 | 0.59 ns   |
| Prkra         | protein kinase, interferon inducible double stranded RNA dependent activator                      | 23992  | 0.58  | 0.56  | 0.36  | 1.61 | 0.37 ns   |
| Hoxa5         | homeo box A5                                                                                      | 15402  | 0.72  | 0.74  | 0.64  | 1.12 | -0.20 ns  |
| Hdac6         |                                                                                                   | 15185  | 1.32  | 1.41  | 2.61  | 0.50 | -0.10 ns  |
| F2r1          | coagulation factor II (thrombin) receptor-like 1                                                  | 14063  | 0.54  | 1.04  | 1.98  | 0.27 | -0.70 ns  |
| Ndufa10       | NADH dehydrogenase (ubiquinone) 1 alpha subcomplex 10                                             | 67273  | 2.86  | 2.90  | 2.29  | 1.24 | 0.42 ns   |
| Stx12         | syntaxin 12                                                                                       | 100226 | 1.35  | 1.43  | 1.72  | 0.79 | -0.64 ns  |
| Slc35b3       | solute carrier family 35, member B3                                                               | 108652 | 0.52  | 0.51  | 0.62  | 0.84 | -0.35 ns  |
| Rpa3          | replication protein A3                                                                            | 68240  | 1.94  | 2.01  | 2.60  | 0.75 | -0.56 ns  |
| Usp25         | ubiquitin specific peptidase 25                                                                   | 30940  | 0.90  | 0.91  | 1.76  | 0.51 | -0.84 *   |
| Nrp1          | neuropilin 1                                                                                      | 18186  | 2.25  | 1.14  | 0.53  | 4.19 | 0.90 *    |
| Kif3c         | kinesin family member 3C                                                                          | 16570  | 0.47  | 0.51  | 0.57  | 0.82 | -0.98 *** |
| 2810004N23Rik | RIKEN cDNA 2810004N23 gene                                                                        | 66523  | 0.85  | 0.88  | 0.42  | 2.03 | 0.72 ns   |
| Rag1ap1       | recombination activating gene 1 activating protein 1                                              | 19729  | 0.80  | 0.91  | 0.77  | 1.03 | -0.19 ns  |
| Il1r1         | interleukin 1 receptor, type I                                                                    | 16177  | 0.76  | 1.00  | 0.95  | 0.80 | -0.62 ns  |
| Blm           | Bloom syndrome homolog (human)                                                                    | 12144  | 0.46  | 0.59  | 0.74  | 0.61 | -0.42 ns  |
| Nrip3         | nuclear receptor interacting protein 3                                                            | 78593  | 0.45  | 0.41  | 0.17  | 2.68 | 0.37 ns   |
| Stard10       | START domain containing 10                                                                        | 56018  | 1.72  | 1.76  | 2.31  | 0.74 | -0.85 *   |
| Ndufs4        | NADH dehydrogenase (ubiquinone) Fe-S protein 4                                                    | 17993  | 1.02  | 1.42  | 2.00  | 0.51 | -0.73 ns  |
| Cxzc5         | CXXC finger 5                                                                                     | 67393  | 1.93  | 1.87  | 1.59  | 1.21 | 0.36 ns   |
| Plscr2        | phospholipid scramblase 2                                                                         | 18828  | 0.30  | 0.42  | 0.46  | 0.64 | -0.88 *   |
| Nfyc          | nuclear transcription factor-Y gamma                                                              | 18046  | 1.32  | 1.35  | 1.24  | 1.05 | 0.52 ns   |
| Nipsnap3a     | nipsnap homolog 3A (C. elegans)                                                                   | 66536  | 0.33  | 0.49  | 0.56  | 0.60 | -0.89 *   |
| Sult1d1       | sulfotransferase family 1D, member 1                                                              | 53315  | 0.93  | 0.20  | 0.14  | 6.43 | 0.13 ns   |
| Tfip11        | tuftelin interacting protein 11                                                                   | 54723  | 0.51  | 0.58  | 0.55  | 0.93 | -0.49 ns  |
| Ngef          | neuronal guanine nucleotide exchange factor                                                       | 53972  | 0.31  | 0.39  | 0.25  | 1.22 | 0.33 ns   |
| Muted         | muted                                                                                             | 17828  | 0.61  | 0.74  | 0.63  | 0.97 | 0.10 ns   |
| Dusp22        | dual specificity phosphatase 22                                                                   | 105352 | 0.54  | 0.63  | 0.74  | 0.74 | -0.85 *   |
| Acadl         | acyl-Coenzyme A dehydrogenase, long-chain                                                         | 11363  | 3.28  | 2.85  | 3.11  | 1.05 | -0.31 ns  |
| Atg3          | autophagy-related 3 (yeast)                                                                       | 67841  | 2.09  | 1.99  | 1.88  | 1.11 | 0.00 ns   |
| D10Jhu81e     | DNA segment, Chr 10, Johns Hopkins University 81 expressed                                        | 28295  | 1.32  | 1.19  | 1.09  | 1.21 | -0.23 ns  |
| Ivd           | isovaleryl coenzyme A dehydrogenase                                                               | 56357  | 0.57  | 0.48  | 0.54  | 1.05 | -0.05 ns  |
| Phlda3        | pleckstrin homology-like domain, family A, member 3                                               | 27280  | 0.74  | 0.68  | 0.91  | 0.82 | -0.80 ns  |
| Vti1b         | vesicle transport through interaction with t-SNAREs 1B homolog                                    | 53612  | 3.74  | 4.01  | 4.89  | 0.76 | -0.34 ns  |
| Mrpl46        | mitochondrial ribosomal protein L46                                                               | 67308  | 0.58  | 0.57  | 0.55  | 1.06 | 0.46 ns   |
| Btg3          |                                                                                                   | 12228  | 1.36  | 1.13  | 1.40  | 0.96 | 0.24 ns   |
| Tulp3         | tubby-like protein 3                                                                              | 22158  | 0.61  | 0.57  | 0.39  | 1.54 | 0.22 ns   |
| Lactb         | lactamase, beta                                                                                   | 80907  | 0.55  | 0.50  | 0.55  | 1.00 | 0.34 ns   |
| Pfn1          | profilin 1                                                                                        | 18643  | 10.37 | 9.51  | 9.45  | 1.09 | 0.69 ns   |
| Akap1         | A kinase (PRKA) anchor protein 1                                                                  | 11640  | 0.90  | 0.83  | 0.95  | 0.94 | -0.55 ns  |
| Plscr3        | phospholipid scramblase 3                                                                         | 70310  | 1.72  | 1.78  | 1.88  | 0.91 | -0.49 ns  |
| Rpp21         | ribonuclease P 21 subunit (human)                                                                 | 67676  | 0.80  | 0.72  | 0.59  | 1.35 | 0.94 **   |
| Nes           | nestin                                                                                            | 18008  | 0.63  | 0.75  | 0.44  | 1.41 | 0.57 ns   |
| Ezh1          | enhancer of zeste homolog 1 (Drosophila)                                                          | 14055  | 1.04  | 0.97  | 1.05  | 0.98 | 0.39 ns   |
| Hexa          | hexosaminidase A                                                                                  | 15211  | 0.78  | 0.60  | 1.03  | 0.76 | -0.61 ns  |
| Ifit3         | interferon-induced protein with tetratricopeptide repeats 3                                       | 15959  | 0.42  | 0.24  | 1.11  | 0.38 | -0.53 ns  |
| Ifnar1        | interferon (alpha and beta) receptor 1                                                            | 15975  | 0.66  | 0.68  | 0.75  | 0.87 | -0.77 ns  |
| Rhou          | ras homolog gene family, member U                                                                 | 69581  | 1.15  | 1.18  | 0.61  | 1.89 | 0.49 ns   |
| Sephs2        | selenophosphate synthetase 2                                                                      | 20768  | 0.77  | 0.96  | 1.06  | 0.72 | -0.66 ns  |
| Trip6         | thyroid hormone receptor interactor 6                                                             | 22051  | 2.60  | 2.50  | 2.06  | 1.26 | 0.77 ns   |
| Naga          | N-acetyl galactosaminidase, alpha                                                                 | 17939  | 1.08  | 1.01  | 1.05  | 1.02 | -0.14 ns  |
| Eef1e1        | eukaryotic translation elongation factor 1 epsilon 1                                              | 66143  | 1.36  | 1.38  | 1.70  | 0.79 | -0.66 ns  |
| Afg3l1        | AFG3(ATPase family gene 3)-like 1 (yeast)                                                         | 114896 | 0.69  | 0.73  | 0.56  | 1.23 | 0.58 ns   |
| Rab4a         | RAB4A, member RAS oncogene family                                                                 | 19341  | 0.46  | 0.35  | 0.21  | 2.21 | 0.64 ns   |
| Dnmt3b        | DNA methyltransferase 3B                                                                          | 13436  | 0.35  | 0.54  | 0.38  | 0.91 | 0.19 ns   |
| Oxct1         | 3-oxoacid CoA transferase 1                                                                       | 67041  | 3.65  | 4.44  | 2.59  | 1.40 | 0.28 ns   |
| LOC631653     |                                                                                                   | 631653 | 0.51  | 0.48  | 0.67  | 0.75 | 0.01 ns   |
| Prim1         | DNA primase, p49 subunit                                                                          | 19075  | 6.04  | 5.48  | 4.07  | 1.47 | 0.77 ns   |
| Sec22b        | SEC22 vesicle trafficking protein homolog B (S. cerevisiae)                                       | 20333  | 1.40  | 1.24  | 1.13  | 1.23 | 0.86 *    |
| Arhgef7       | Rho guanine nucleotide exchange factor (GEF7)                                                     | 54126  | 0.79  | 0.82  | 0.80  | 0.98 | 0.40 ns   |
| Zfp148        | zinc finger protein 148                                                                           | 22661  | 1.67  | 1.49  | 1.61  | 1.03 | -0.02 ns  |
| N6amt2        | N-6 adenine-specific DNA methyltransferase 2 (putative)                                           | 68043  | 0.70  | 0.78  | 0.73  | 0.94 | 0.17 ns   |
| Exdl2         | exonuclease 3'-5' domain-like 2                                                                   | 97827  | 0.36  | 0.30  | 0.38  | 0.93 | 0.16 ns   |
| St3gal6       | ST3 beta-galactoside alpha-2,3-sialyltransferase 6                                                | 54613  | 1.44  | 1.05  | 0.62  | 2.31 | 0.24 ns   |
| Sh3d19        | SH3 domain protein D19                                                                            | 27059  | 2.52  | 2.98  | 2.36  | 1.06 | -0.38 ns  |
| Phf10         | PHD finger protein 10                                                                             | 72057  | 2.52  | 2.80  | 2.14  | 1.17 | 0.65 ns   |
| Yes1          | Yamaguchi sarcoma viral (v-yes) oncogene homolog 1                                                | 22612  | 0.55  | 0.62  | 0.75  | 0.72 | -0.45 ns  |
| Cldn8         | claudin 8                                                                                         | 54420  | 6.34  | 4.68  | 2.65  | 2.38 | -0.09 ns  |
| Ctf1          | cardiotrophin 1                                                                                   | 13019  | 0.50  | 0.40  | 0.47  | 1.05 | -0.18 ns  |
| Vps54         | vacuolar protein sorting 54 (yeast)                                                               | 245944 | 1.53  | 1.28  | 1.64  | 0.93 | -0.07 ns  |
| Txnrd2        | thioredoxin reductase 2                                                                           | 26462  | 0.47  | 0.35  | 0.34  | 1.36 | 0.62 ns   |
| Lrba          | LPS-responsive beige-like anchor                                                                  | 80877  | 4.37  | 4.08  | 2.30  | 1.89 | 0.60 ns   |
| Pard6a        | par-6 (partitioning defective 6,) homolog alpha (C. elegans)                                      | 56513  | 0.32  | 0.37  | 0.40  | 0.82 | -0.13 ns  |
| Fdx1          | ferredoxin 1                                                                                      | 14148  | 1.46  | 1.11  | 1.09  | 1.34 | 0.68 ns   |
| Socs2         | suppressor of cytokine signaling 2                                                                | 216233 | 0.63  | 0.58  | 0.80  | 0.79 | -0.56 ns  |
| Rhob          | ras homolog gene family, member B                                                                 | 11852  | 5.64  | 5.14  | 4.78  | 1.17 | 0.45 ns   |
| Grb2          | growth factor receptor bound protein 2                                                            | 14784  | 0.82  | 0.78  | 0.93  | 0.88 | 0.16 ns   |
| Gbp111        | GC-rich promoter binding protein 1-like 1                                                         | 77110  | 0.59  | 0.55  | 0.68  | 0.86 | -0.18 ns  |
| Dbt           | dihydrolypoamide branched chain transacylase E2                                                   | 13171  | 0.51  | 0.47  | 0.27  | 1.84 | 0.13 ns   |

|               |                                                                                                                  |        |       |       |       |      |          |
|---------------|------------------------------------------------------------------------------------------------------------------|--------|-------|-------|-------|------|----------|
| Tnfaip81      | tumor necrosis factor, alpha-induced protein 8-like 1                                                            | 66443  | 0.56  | 0.44  | 0.35  | 1.58 | 0.87 *   |
| Sprr1a        | small proline-rich protein 1A                                                                                    | 20753  | 0.41  | 0.52  | 1.40  | 0.29 | -0.85 *  |
| Sf3b1         | splicing factor 3b, subunit 1                                                                                    | 81898  | 5.30  | 4.87  | 4.70  | 1.12 | 0.27 ns  |
| 2310008M10Rik | RIKEN cDNA 2310008M10 gene                                                                                       | 66357  | 2.68  | 2.76  | 2.73  | 0.98 | 0.13 ns  |
| Fblim1        | filamin binding LIM protein 1                                                                                    | 74202  | 0.56  | 0.49  | 0.54  | 1.02 | -0.03 ns |
| Gna11         | guanine nucleotide binding protein, alpha 11                                                                     | 14672  | 2.15  | 1.84  | 1.92  | 1.11 | 0.09 ns  |
| Cav1          | caveolin, caveolae protein 1                                                                                     | 12389  | 2.54  | 2.43  | 3.44  | 0.73 | -0.02 ns |
| Phf1          | putative homeodomain transcription factor 1                                                                      | 18685  | 0.98  | 1.07  | 0.85  | 1.15 | -0.18 ns |
| Pctk3         | PCTAIRE-motif protein kinase 3                                                                                   | 18557  | 0.62  | 0.66  | 0.53  | 1.17 | -0.17 ns |
| Cdkn2b        | cyclin-dependent kinase inhibitor 2B (p15, inhibits CDK4)                                                        | 12579  | 1.02  | 0.87  | 0.96  | 1.05 | -0.20 ns |
| Pop7          | processing of precursor 7, ribonuclease P family, (S. cerevisiae)                                                | 74097  | 0.60  | 0.70  | 0.68  | 0.88 | -0.70 ns |
| Sigirr        | single immunoglobulin and toll-interleukin 1 receptor (TIR) domain                                               | 24058  | 0.45  | 0.53  | 0.62  | 0.71 | -0.67 ns |
| Cd68          | CD68 antigen                                                                                                     | 12514  | 0.15  | 0.25  | 0.47  | 0.33 | -0.77 ns |
| S100a14       | S100 calcium binding protein A14                                                                                 | 66166  | 1.44  | 2.13  | 2.63  | 0.54 | -0.64 ns |
| Epb4.114a     | erythrocyte protein band 4.1-like 4a                                                                             | 13824  | 1.67  | 1.66  | 0.94  | 1.77 | 0.56 ns  |
| Ttk           | Ttk protein kinase                                                                                               | 22137  | 0.60  | 0.65  | 0.72  | 0.83 | 0.29 ns  |
| Pdgfa         | platelet derived growth factor, alpha                                                                            | 18590  | 0.78  | 0.95  | 0.97  | 0.80 | -0.83 *  |
| Midn          | midnolin                                                                                                         | 59090  | 0.97  | 0.75  | 0.70  | 1.39 | 0.18 ns  |
| BC003266      | cDNA sequence BC003266                                                                                           | 80284  | 0.37  | 0.44  | 0.40  | 0.94 | 0.29 ns  |
| Mrps25        | mitochondrial ribosomal protein S25                                                                              | 64658  | 0.83  | 0.90  | 1.12  | 0.74 | -0.43 ns |
| EG619900      |                                                                                                                  | 619900 | 25.70 | 24.34 | 21.73 | 1.18 | 0.65 ns  |
| EG667035      |                                                                                                                  | 667035 | 25.70 | 24.34 | 21.73 | 1.18 | 0.65 ns  |
| LOC639567     |                                                                                                                  | 639567 | 25.70 | 24.34 | 21.73 | 1.18 | 0.65 ns  |
| Rps27a        |                                                                                                                  | 78294  | 25.70 | 24.34 | 21.73 | 1.18 | 0.65 ns  |
| Muc1          | mucin 1, transmembrane                                                                                           | 17829  | 1.15  | 2.47  | 1.76  | 0.65 | -0.60 ns |
| Nup155        | nucleoporin 155                                                                                                  | 170762 | 1.86  | 1.69  | 1.92  | 0.96 | -0.08 ns |
| Sema4g        | sema domain, immunoglobulin domain (Ig), transmembrane domain (TM) and short cytoplasmic domain, (semaphorin) 4G | 26456  | 0.72  | 0.66  | 0.17  | 4.24 | -0.28 ns |
| Kif20a        | kinesin family member 20A                                                                                        | 19348  | 0.68  | 0.77  | 0.96  | 0.71 | 0.14 ns  |
| Bpnt1         | bisphosphate 3'-nucleotidase 1                                                                                   | 23827  | 0.88  | 0.86  | 0.79  | 1.11 | -0.25 ns |
| Lage3         | L antigen family, member 3                                                                                       | 66192  | 0.90  | 0.93  | 1.31  | 0.68 | -0.41 ns |
| Casp8ap2      | caspace 8 associated protein 2                                                                                   | 26885  | 1.64  | 1.74  | 2.09  | 0.78 | -0.38 ns |
| Cdkl2         | cyclin-dependent kinase-like 2 (CDC2-related kinase)                                                             | 53886  | 0.34  | 0.40  | 0.37  | 0.91 | 0.22 ns  |
| Rps19         | ribosomal protein S19                                                                                            | 20085  | 12.06 | 12.45 | 10.83 | 1.11 | 0.20 ns  |
| Prcc          | papillary renal cell carcinoma (translocation-associated)                                                        | 94315  | 0.40  | 0.43  | 0.33  | 1.19 | 0.69 ns  |
| Spp1          | secreted phosphoprotein 1                                                                                        | 20750  | 1.83  | 2.33  | 6.25  | 0.29 | -0.79 ns |
| Rpl15         | ribosomal protein L15                                                                                            | 66480  | 18.96 | 18.30 | 16.44 | 1.15 | 0.55 ns  |
| Rab11a        | RAB11a, member RAS oncogene family                                                                               | 53869  | 3.39  | 2.76  | 3.40  | 0.99 | -0.22 ns |
| D11Wsu99e     | DNA segment, Chr 11, Wayne State University 99, expressed                                                        | 28081  | 1.11  | 1.01  | 1.15  | 0.96 | 0.36 ns  |
| Hebp2         | heme binding protein 2                                                                                           | 56016  | 0.64  | 0.75  | 0.50  | 1.27 | -0.23 ns |
| Eif2ak3       | eukaryotic translation initiation factor 2 alpha kinase 3                                                        | 13666  | 0.83  | 0.83  | 0.92  | 0.90 | -0.78 ns |
| Nrtn          | neurturin                                                                                                        | 18188  | 0.43  | 0.35  | 0.16  | 2.72 | 0.96 **  |
| Mapk12        | mitogen-activated protein kinase 12                                                                              | 29857  | 1.54  | 1.49  | 1.18  | 1.29 | 0.87 *   |
| B2m           | beta-2 microglobulin                                                                                             | 12010  | 2.35  | 2.39  | 5.17  | 0.45 | -0.20 ns |
| Dpysl5        | dihydropyrimidinase-like 5                                                                                       | 65254  | 0.51  | 0.46  | 0.32  | 1.62 | 0.72 ns  |
| Dcbld1        | discoidin, CUB and LCCL domain containing 1                                                                      | 66686  | 0.51  | 0.48  | 0.21  | 2.41 | 0.57 ns  |
| Sap30bp       | SAP30 binding protein                                                                                            | 57230  | 0.32  | 0.39  | 0.49  | 0.65 | -0.29 ns |
| Abca2         | ATP-binding cassette, sub-family A (ABC1), member 2                                                              | 11305  | 0.47  | 0.48  | 0.31  | 1.52 | 0.67 ns  |
| Sesn3         | sestrin 3                                                                                                        | 75747  | 0.63  | 0.49  | 0.32  | 1.94 | 0.66 ns  |
| Zfpn2         | zinc finger protein, multitype 2                                                                                 | 22762  | 1.09  | 0.77  | 1.13  | 0.96 | -0.06 ns |
| LOC674810     |                                                                                                                  | 674810 | 26.40 | 25.49 | 20.42 | 1.29 | 0.84 *   |
| Rpl3          |                                                                                                                  | 27367  | 26.40 | 25.49 | 20.42 | 1.29 | 0.84 *   |
| Ly75          | lymphocyte antigen 75                                                                                            | 17076  | 0.32  | 0.37  | 0.33  | 0.96 | -0.41 ns |
| Sf3a1         | splicing factor 3a, subunit 1                                                                                    | 67465  | 0.99  | 0.99  | 1.26  | 0.78 | -0.70 ns |
| Timp3         | tissue inhibitor of metalloproteinase 3                                                                          | 21859  | 1.14  | 0.91  | 1.74  | 0.65 | -0.71 ns |
| D10Ert641e    | DNA segment, Chr 10, ERATO Doi 641, expressed                                                                    | 52717  | 1.53  | 1.31  | 1.27  | 1.20 | 0.21 ns  |
| Ptplb         | protein tyrosine phosphatase-like (proline instead of catalytic arginine), member b                              | 70757  | 1.79  | 1.46  | 1.77  | 1.01 | 0.02 ns  |
| Sin3a         | transcriptional regulator, SIN3A (yeast)                                                                         | 20466  | 1.27  | 1.02  | 1.07  | 1.17 | 0.75 ns  |
| Ccdc34        | coiled-coil domain containing 34                                                                                 | 68201  | 1.06  | 0.75  | 1.09  | 0.96 | 0.08 ns  |
| Riok1         | RIO kinase 1 (yeast)                                                                                             | 71340  | 0.57  | 0.58  | 0.58  | 0.96 | 0.01 ns  |
| Mpp6          | membrane protein, palmitoylated 6 (MAGUK p55 subfamily member 6)                                                 | 56524  | 1.16  | 1.42  | 1.53  | 0.76 | -0.23 ns |
| Nudt1         | nudix (nucleoside diphosphate linked moiety X)-type motif 1                                                      | 17766  | 1.28  | 1.38  | 1.37  | 0.93 | -0.22 ns |
| Zmat3         | zinc finger matrix type 3                                                                                        | 22401  | 0.64  | 0.66  | 0.94  | 0.68 | -0.76 ns |
| Eps15H        | epidermal growth factor receptor pathway substrate 15-like 1                                                     | 13859  | 0.56  | 0.40  | 0.55  | 1.01 | 0.20 ns  |
| 2310030G06Rik | RIKEN cDNA 2310030G06 gene                                                                                       | 66952  | 0.72  | 0.54  | 0.62  | 1.16 | 0.47 ns  |
| Mink1         | misshapen-like kinase 1 (zebrafish)                                                                              | 50932  | 0.53  | 0.46  | 0.67  | 0.79 | -0.67 ns |
| Atf3          | activating transcription factor 3                                                                                | 11910  | 0.46  | 0.68  | 0.40  | 1.13 | 0.19 ns  |
| Nicn1         | nicotinic 1                                                                                                      | 66257  | 0.38  | 0.52  | 0.40  | 0.94 | 0.41 ns  |
| Adssl1        | adenylosuccinate synthetase like 1                                                                               | 11565  | 0.44  | 0.73  | 0.57  | 0.78 | -0.07 ns |
| Hoxb2         | homeo box B2                                                                                                     | 103889 | 0.98  | 0.66  | 0.59  | 1.66 | 0.45 ns  |
| 1810046J19Rik | RIKEN cDNA 1810046J19 gene                                                                                       | 103742 | 1.72  | 1.59  | 2.13  | 0.80 | -0.64 ns |
| Zfp53         | zinc finger protein 53                                                                                           | 24132  | 0.73  | 0.67  | 0.39  | 1.88 | 0.83 *   |
| Chd1l         | chromodomain helicase DNA binding protein 1-like                                                                 | 68058  | 0.89  | 1.00  | 1.08  | 0.82 | -0.69 ns |
| Dock8         | dedicator of cytokinesis 8                                                                                       | 76088  | 0.50  | 0.56  | 0.12  | 4.26 | 0.59 ns  |
| Plek2         | pleckstrin 2                                                                                                     | 27260  | 0.42  | 0.52  | 0.61  | 0.68 | -0.36 ns |
| Fkbp1b        | FK506 binding protein 1b                                                                                         | 14226  | 0.51  | 0.49  | 0.42  | 1.20 | 0.66 ns  |
| B4gal3        | UDP-Gal:betaGlcNAc beta 1,4-galactosyltransferase, polypeptide 3                                                 | 57370  | 0.77  | 0.73  | 0.69  | 1.10 | -0.19 ns |
| EG667759      |                                                                                                                  | 667759 | 23.06 | 20.36 | 17.95 | 1.28 | 0.97 **  |
| D6Wsu163e     | DNA segment, Chr 6, Wayne State University 163, expressed                                                        | 28040  | 0.61  | 0.61  | 0.64  | 0.95 | -0.44 ns |
| Dpm1          | dolichol-phosphate (beta-D) mannosyltransferase 1                                                                | 13480  | 0.90  | 0.82  | 1.04  | 0.86 | -0.71 ns |
| KlF7          | Kruppel-like factor 7 (ubiquitous)                                                                               | 93691  | 1.13  | 1.17  | 0.78  | 1.45 | 0.12 ns  |
| Wbp1          | WW domain binding protein 1                                                                                      | 22377  | 1.14  | 1.16  | 1.43  | 0.79 | -0.58 ns |
| Mfp1a         | microfibrillar-associated protein 1A                                                                             | 67532  | 2.67  | 2.20  | 1.58  | 1.68 | 0.84 *   |
| Ccdc59        | coiled-coil domain containing 59                                                                                 | 52713  | 0.37  | 0.35  | 0.30  | 1.22 | 0.57 ns  |
| Med9          | mediator of RNA polymerase II transcription, subunit 9 homolog (yeast)                                           | 192191 | 0.52  | 0.55  | 0.76  | 0.68 | -0.57 ns |
| Bst1          | bone marrow stromal cell antigen 1                                                                               | 12182  | 0.25  | 0.61  | 1.86  | 0.14 | -0.73 ns |

|               |                                                                                              |        |       |       |      |      |          |
|---------------|----------------------------------------------------------------------------------------------|--------|-------|-------|------|------|----------|
| Rage          | renal tumor antigen                                                                          | 26448  | 0.61  | 0.61  | 0.54 | 1.13 | -0.24 ns |
| Slc25a13      | solute carrier family 25 (mitochondrial carrier, adenine nucleotide translocator), member 13 | 50799  | 1.20  | 0.79  | 0.86 | 1.38 | -0.08 ns |
| Polk          | polymerase (DNA directed), kappa                                                             | 27015  | 0.36  | 0.49  | 0.74 | 0.48 | -0.91 *  |
| Ripk1         | receptor (TNFRSF)-interacting serine-threonine kinase 1                                      | 19766  | 0.71  | 0.67  | 0.93 | 0.76 | -0.59 ns |
| Mbd4          | methyl-CpG binding domain protein 4                                                          | 17193  | 0.44  | 0.42  | 0.35 | 1.22 | -0.11 ns |
| Card10        | caspase recruitment domain family, member 10                                                 | 105844 | 1.70  | 1.68  | 1.44 | 1.18 | -0.13 ns |
| Hoxa7         | homeo box A7                                                                                 | 15404  | 0.22  | 0.24  | 0.28 | 0.80 | -0.70 ns |
| Eef1d         | eukaryotic translation elongation factor 1 delta (guanine nucleotide exchange protein)       | 66656  | 7.26  | 7.70  | 6.70 | 1.08 | 0.55 ns  |
| Ssbp4         | single stranded DNA binding protein 4                                                        | 76900  | 0.81  | 0.88  | 0.90 | 0.90 | -0.72 ns |
| Gadd45a       | growth arrest and DNA-damage-inducible 45 alpha                                              | 13197  | 0.93  | 1.21  | 0.97 | 0.96 | -0.07 ns |
| Bcl7c         | B-cell CLL/lymphoma 7C                                                                       | 12055  | 0.67  | 0.68  | 0.86 | 0.78 | -0.83 *  |
| Gdpd3         | glycerophosphodiester phosphodiesterase domain containing 3                                  | 68616  | 0.94  | 0.91  | 0.87 | 1.07 | -0.22 ns |
| LOC635918     |                                                                                              | 635918 | 0.23  | 0.39  | 0.28 | 0.82 | -0.39 ns |
| Zfp617        | zinc finger protein 617                                                                      | 170938 | 0.79  | 0.87  | 0.93 | 0.85 | -0.81 *  |
| C920025E04Rik |                                                                                              | 667803 | 0.44  | 0.43  | 0.98 | 0.45 | -0.53 ns |
| H2-T23        |                                                                                              | 15040  | 0.44  | 0.43  | 0.98 | 0.45 | -0.53 ns |
| Gstp1         | glutathione S-transferase, pi 1                                                              | 14870  | 10.80 | 10.67 | 9.51 | 1.13 | 0.73 ns  |
| Sh3y1         | Sh3 domain YSC-like 1                                                                        | 24057  | 2.29  | 2.32  | 2.56 | 0.89 | -0.55 ns |
| Al314976      |                                                                                              | 106821 | 0.66  | 0.67  | 0.47 | 1.39 | 0.50 ns  |
| Golga3        | golgi autoantigen, golgin subfamily a, 3                                                     | 269682 | 0.77  | 0.78  | 0.78 | 0.98 | -0.20 ns |
| 2900092E17Rik | RIKEN cDNA 2900092E17 gene                                                                   | 67278  | 0.60  | 0.70  | 0.72 | 0.84 | -0.18 ns |
| Atp6ap1       | ATPase, H+ transporting, lysosomal accessory protein 1                                       | 54411  | 1.37  | 1.67  | 3.07 | 0.45 | -0.70 ns |
| Txnrd3        | thioredoxin reductase 3                                                                      | 232223 | 0.38  | 0.49  | 0.38 | 0.98 | -0.42 ns |
| Stard7        | START domain containing 7                                                                    | 99138  | 3.38  | 2.85  | 2.36 | 1.42 | 0.59 ns  |
| Nt5c3l        | 5'-nucleotidase, cytosolic III-like                                                          | 68106  | 0.53  | 0.57  | 0.56 | 0.93 | 0.28 ns  |
| Btf3          | basic transcription factor 3                                                                 | 218490 | 6.19  | 7.45  | 9.01 | 0.68 | -0.90 *  |
| Coro1c        | coronin, actin binding protein 1C                                                            | 23790  | 0.69  | 0.95  | 1.09 | 0.63 | -0.52 ns |
| Rnf20         | ring finger protein 20                                                                       | 109331 | 0.45  | 0.67  | 0.73 | 0.62 | -0.64 ns |
| Fnip1         | folliculin interacting protein 1                                                             | 216742 | 0.64  | 0.68  | 1.40 | 0.46 | -0.85 *  |
| Pdd6ip        | programmed cell death 6 interacting protein                                                  | 18571  | 1.28  | 1.37  | 1.52 | 0.84 | 0.01 ns  |
| Stx5a         | syntaxin 5A                                                                                  | 56389  | 3.65  | 3.39  | 2.55 | 1.42 | 0.74 ns  |
| Scp2          | sterol carrier protein 2, liver                                                              | 20280  | 1.70  | 1.96  | 2.63 | 0.65 | -0.84 *  |
| Mfn1          | mitofusin 1                                                                                  | 67414  | 1.11  | 1.09  | 0.98 | 1.12 | -0.01 ns |
| C330027C09Rik | RIKEN cDNA C330027C09 gene                                                                   | 224171 | 1.36  | 1.41  | 2.17 | 0.62 | -0.65 ns |
| Chek1         | checkpoint kinase 1 homolog (S. pombe)                                                       | 12649  | 1.39  | 1.47  | 1.37 | 1.01 | 0.58 ns  |
| Atp6v1e1      | VATPase, H+ transporting, lysosomal V1 subunit E1                                            | 11973  | 2.33  | 2.61  | 3.17 | 0.73 | -0.68 ns |
| 5730472N09Rik | RIKEN cDNA 5730472N09 gene                                                                   | 108958 | 0.80  | 0.71  | 0.53 | 1.51 | 0.15 ns  |
| D8ErtD738e    | DNA segment, Chr 8, ERATO Doi 738, expressed                                                 | 101966 | 2.44  | 2.43  | 2.77 | 0.88 | -0.08 ns |
| Bbs4          | Bardet-Biedl syndrome 4 homolog (human)                                                      | 102774 | 0.24  | 0.24  | 0.17 | 1.41 | 0.64 ns  |
| Tfb1m         | transcription factor B1, mitochondrial                                                       | 224481 | 0.47  | 0.42  | 0.36 | 1.28 | 0.52 ns  |
| Pkp2          | plakophilin 2                                                                                | 67451  | 2.44  | 2.39  | 2.68 | 0.91 | -0.10 ns |
| Phf7          | PHD finger protein 7                                                                         | 71838  | 0.25  | 0.30  | 0.43 | 0.58 | -0.57 ns |
| Ssbp2         | single-stranded DNA binding protein 2                                                        | 66970  | 0.25  | 0.20  | 0.47 | 0.53 | -0.59 ns |
| Memo1         |                                                                                              | 76890  | 1.00  | 0.97  | 0.58 | 1.71 | 0.64 ns  |
| Casp3         | caspase 3                                                                                    | 12367  | 1.79  | 1.89  | 1.80 | 0.99 | 0.44 ns  |
| Kif3a         | kinesin family member 3A                                                                     | 16568  | 0.58  | 0.80  | 0.91 | 0.63 | -0.90 *  |
| Ephb4         | Eph receptor B4                                                                              | 13846  | 0.49  | 0.52  | 0.45 | 1.09 | 0.50 ns  |
| Fbxl6         | F-box and leucine-rich repeat protein 6                                                      | 30840  | 0.34  | 0.37  | 0.47 | 0.73 | -0.83 *  |
| Ehd4          | EH-domain containing 4                                                                       | 98878  | 1.28  | 1.18  | 1.29 | 0.99 | -0.09 ns |
| Uchl3         |                                                                                              | 50933  | 1.47  | 1.75  | 2.08 | 0.71 | -0.71 ns |
| Uchl4         |                                                                                              | 93841  | 1.47  | 1.75  | 2.08 | 0.71 | -0.71 ns |
| Nek4          | NIMA (never in mitosis gene a)-related expressed kinase 4                                    | 23955  | 0.37  | 0.38  | 0.38 | 0.95 | -0.62 ns |
| H2-T22        |                                                                                              | 15039  | 0.72  | 0.86  | 0.91 | 0.79 | 0.09 ns  |
| H2-T9         |                                                                                              | 15051  | 0.72  | 0.86  | 0.91 | 0.79 | 0.09 ns  |
| Kifc1         |                                                                                              | 16580  | 0.58  | 0.42  | 0.32 | 1.83 | 0.78 ns  |
| Ociad1        | OCIA domain containing 1                                                                     | 68095  | 2.86  | 2.78  | 2.81 | 1.01 | -0.02 ns |
| Lrig1         | leucine-rich repeats and immunoglobulin-like domains 1                                       | 16206  | 0.31  | 0.34  | 0.44 | 0.71 | -0.82 *  |
| Mtcp1         | mature T-cell proliferation 1                                                                | 17763  | 0.31  | 0.26  | 0.58 | 0.53 | -0.35 ns |
| Dynl13        | dynein light chain Tctex-type 3                                                              | 67117  | 2.09  | 2.15  | 2.97 | 0.70 | 0.04 ns  |
| Ssr2          | signal sequence receptor, beta                                                               | 66256  | 1.66  | 2.00  | 2.07 | 0.80 | -0.79 ns |
| Dnaja3        | DnaJ (Hsp40) homolog, subfamily A, member 3                                                  | 83945  | 1.28  | 1.58  | 1.98 | 0.64 | -0.94 ** |
| Eif2b4        | eukaryotic translation initiation factor 2B, subunit 4 delta                                 | 13667  | 1.15  | 1.05  | 1.06 | 1.08 | 0.38 ns  |
| Ilk           | integrin linked kinase                                                                       | 16202  | 2.03  | 1.68  | 1.64 | 1.23 | 0.89 *   |
| Sec61a2       | Sec61, alpha subunit 2 (S. cerevisiae)                                                       | 57743  | 0.66  | 0.72  | 0.55 | 1.19 | 0.78 ns  |
| Nfkbil1       | nuclear factor of kappa light polypeptide gene enhancer in B-cells inhibitor-like 1          | 18038  | 0.46  | 0.47  | 0.34 | 1.36 | 0.74 ns  |
| Sim1          | single-minded homolog 1 (Drosophila)                                                         | 20464  | 0.72  | 0.53  | 0.56 | 1.28 | -0.06 ns |
| Acot10        |                                                                                              | 64833  | 1.22  | 1.50  | 2.20 | 0.55 | -0.21 ns |
| Acot9         |                                                                                              | 56360  | 1.22  | 1.50  | 2.20 | 0.55 | -0.21 ns |
| BC018101      | cDNA sequence BC018101                                                                       | 449000 | 0.62  | 0.71  | 0.65 | 0.95 | 0.42 ns  |
| Hsd17b12      | hydroxysteroid (17-beta) dehydrogenase 12                                                    | 56348  | 3.22  | 2.56  | 2.81 | 1.14 | 0.38 ns  |
| Ywhag         | 3-monooxygenase/tryptophan 5-monooxygenase activation protein, gamma polypeptide             | 22628  | 4.77  | 4.77  | 4.84 | 0.98 | -0.31 ns |
| Ubqln2        | ubiquilin 2                                                                                  | 54609  | 3.49  | 4.02  | 3.96 | 0.88 | 0.24 ns  |
| Gtppb1        | GTP binding protein 1                                                                        | 14904  | 0.62  | 0.67  | 0.76 | 0.80 | -0.31 ns |
| Sufu          | suppressor of fused homolog (Drosophila)                                                     | 24069  | 0.62  | 0.66  | 0.60 | 1.02 | 0.38 ns  |
| B3gnt2        | UDP-GlcNAc:betaGal beta-1,3-N-acetylglucosaminyltransferase 2                                | 53625  | 1.65  | 1.42  | 1.55 | 1.06 | -0.19 ns |
| Lancl2        | LanC (bacterial lantibiotic synthetase component C)-like 2                                   | 71835  | 1.48  | 1.65  | 1.42 | 1.04 | 0.48 ns  |
| Aff4          | AF4/FMR2 family, member 4                                                                    | 93736  | 2.94  | 2.79  | 3.88 | 0.75 | -0.80 ns |
| Stat1         | signal transducer and activator of transcription 1                                           | 20846  | 0.26  | 0.29  | 0.71 | 0.37 | -0.82 *  |
| Fzd7          | frizzled homolog 7 (Drosophila)                                                              | 14369  | 0.23  | 0.30  | 0.33 | 0.69 | -0.63 ns |
| Idh2          | isocitrate dehydrogenase 2 (NADP+), mitochondrial                                            | 269951 | 2.34  | 2.15  | 2.10 | 1.11 | 0.53 ns  |
| Kif2a         | Kinesin family member 2A                                                                     | 16563  | 0.87  | 1.14  | 1.08 | 0.80 | -0.59 ns |
| Add1          | adducin 1 (alpha)                                                                            | 11518  | 3.33  | 3.44  | 3.29 | 1.01 | -0.17 ns |
| Maged1        | melanoma antigen, family D, 1                                                                | 94275  | 1.23  | 1.36  | 1.50 | 0.82 | -0.44 ns |

|               |                                                                                               |        |       |       |       |      |           |
|---------------|-----------------------------------------------------------------------------------------------|--------|-------|-------|-------|------|-----------|
| Ubr1          | ubiquitin protein ligase E3 component n-recognin 1                                            | 22222  | 0.97  | 0.73  | 0.55  | 1.75 | 0.80 ns   |
| 1810034K20Rik | RIKEN cDNA 1810034K20 gene                                                                    | 67881  | 0.49  | 0.57  | 0.64  | 0.77 | -0.79 ns  |
| Pak1          | p21 (CDKN1A)-activated kinase 1                                                               | 18479  | 0.26  | 0.27  | 0.06  | 4.16 | 0.26 ns   |
| Ash1l         | ash1 (absent, small, or homeotic)-like (Drosophila)                                           | 192195 | 1.27  | 1.48  | 1.33  | 0.95 | -0.48 ns  |
| Zfp101        | zinc finger protein 101                                                                       | 22643  | 0.60  | 0.63  | 0.51  | 1.16 | 0.61 ns   |
| Gba           | glucosidase, beta, acid                                                                       | 14466  | 1.27  | 1.38  | 1.25  | 1.01 | 0.06 ns   |
| Amfr          | autocrine motility factor receptor                                                            | 23802  | 1.46  | 1.84  | 2.58  | 0.56 | -0.69 ns  |
| Adam10        | a disintegrin and metallopeptidase domain 10                                                  | 11487  | 0.55  | 0.44  | 0.48  | 1.13 | 0.02 ns   |
| Adh7          | alcohol dehydrogenase 7 (class IV), mu or sigma polypeptide                                   | 11529  | 0.16  | 0.86  | 0.69  | 0.23 | -0.53 ns  |
| Nudt8         | nudix (nucleoside diphosphate linked moiety X)-type motif 8                                   | 66387  | 0.58  | 0.63  | 0.51  | 1.12 | 0.29 ns   |
| Tcf3          | transcription factor 3                                                                        | 21415  | 1.85  | 1.39  | 1.28  | 1.43 | 0.34 ns   |
| Socs6         | suppressor of cytokine signaling 6                                                            | 54607  | 0.61  | 0.55  | 0.65  | 0.93 | 0.25 ns   |
| Bspry         | B-box and SPRY domain containing                                                              | 192120 | 0.57  | 0.68  | 0.61  | 0.93 | 0.23 ns   |
| Serpinb6a     | serine (or cysteine) peptidase inhibitor, clade B, member 6a                                  | 20719  | 4.32  | 3.64  | 4.60  | 0.93 | 0.17 ns   |
| Cdkn2a        | cyclin-dependent kinase inhibitor 2A                                                          | 12578  | 0.48  | 0.40  | 0.35  | 1.37 | 0.17 ns   |
| Ppp1cc        |                                                                                               | 19047  | 12.23 | 11.51 | 11.34 | 1.07 | 0.69 ns   |
| Gnas          | GNAS (guanine nucleotide binding protein, alpha stimulating) complex locus                    | 14683  | 11.55 | 10.51 | 11.26 | 1.02 | 0.27 ns   |
| Galt          | galactose-1-phosphate uridylyl transferase                                                    | 14430  | 0.58  | 0.59  | 0.45  | 1.29 | -0.13 ns  |
| Hoxd4         | homeo box D4                                                                                  | 15436  | 0.38  | 0.27  | 0.11  | 3.40 | 0.65 ns   |
| Map4k2        | mitogen activated protein kinase kinase kinase 2                                              | 26412  | 0.35  | 0.44  | 0.34  | 1.03 | -0.01 ns  |
| Chka          | choline kinase alpha                                                                          | 12660  | 2.91  | 3.02  | 1.47  | 1.96 | 0.61 ns   |
| Ube2f         | ubiquitin-conjugating enzyme E2F (putative)                                                   | 67921  | 1.01  | 0.96  | 0.76  | 1.32 | 0.08 ns   |
| Scin          | scinderin                                                                                     | 20259  | 7.39  | 6.96  | 5.62  | 1.31 | 0.21 ns   |
| Avpr2         | arginine vasopressin receptor 2                                                               | 12000  | 1.33  | 1.28  | 1.32  | 1.00 | 0.25 ns   |
| Gata2         | GATA binding protein 2                                                                        | 14461  | 0.31  | 0.37  | 0.07  | 4.19 | 0.66 ns   |
| Capg          | capping protein (actin filament), gelsolin-like                                               | 12332  | 3.52  | 4.74  | 5.59  | 0.63 | -0.78 ns  |
| Mxi1          | Max interacting protein 1                                                                     | 17859  | 2.16  | 2.09  | 2.06  | 1.05 | -0.18 ns  |
| Kpna3         | karyopherin (importin) alpha 3                                                                | 16648  | 1.42  | 1.14  | 1.54  | 0.92 | -0.46 ns  |
| Twsg1         | twisted gastrulation homolog 1 (Drosophila)                                                   | 65960  | 3.77  | 2.62  | 1.89  | 1.99 | 0.65 ns   |
| Scamp4        | secretory carrier membrane protein 4                                                          | 56214  | 0.50  | 0.49  | 0.49  | 1.02 | 0.16 ns   |
| Golph3        | golgi phosphoprotein 3                                                                        | 66629  | 1.82  | 1.89  | 3.15  | 0.57 | -0.83 *   |
| Slc22a5       | solute carrier family 22 (organic cation transporter), member 5                               | 20520  | 0.56  | 0.58  | 0.67  | 0.83 | -0.86 *   |
| 4930570C03Rik | RIKEN cDNA 4930570C03 gene                                                                    | 67739  | 1.38  | 1.16  | 1.01  | 1.36 | 0.73 ns   |
| Pdgfb         | platelet derived growth factor, B polypeptide                                                 | 18591  | 1.39  | 1.59  | 1.31  | 1.05 | 0.30 ns   |
| Bxdc1         | brix domain containing 1                                                                      | 67239  | 0.70  | 0.87  | 0.52  | 1.35 | 0.45 ns   |
| 2700062C07Rik | RIKEN cDNA 2700062C07 gene                                                                    | 68046  | 0.20  | 0.33  | 0.45  | 0.44 | -0.99 *** |
| Nedd4         | neural precursor cell expressed, developmentally down-regulated gene 4                        | 17999  | 7.73  | 5.69  | 4.92  | 1.56 | 0.90 *    |
| L1cam         | L1 cell adhesion molecule                                                                     | 16728  | 3.51  | 3.40  | 3.75  | 0.93 | -0.01 ns  |
| Narfl         | nuclear prelamin A recognition factor-like                                                    | 67563  | 0.60  | 0.40  | 0.48  | 1.26 | 0.53 ns   |
| Akr1c12       | aldo-keto reductase family 1, member C12                                                      | 622402 | 0.48  | 0.36  | 0.39  | 1.22 | 0.07 ns   |
| 2810433K01Rik | RIKEN cDNA 2810433K01 gene                                                                    | 66468  | 0.30  | 0.48  | 0.53  | 0.57 | 0.07 ns   |
| Agpat3        | 1-acylglycerol-3-phosphate O-acyltransferase 3                                                | 28169  | 1.07  | 0.89  | 0.88  | 1.20 | 0.73 ns   |
| Ppp2r5d       | protein phosphatase 2, regulatory subunit B (B56), delta isoform                              | 21770  | 1.36  | 1.26  | 0.92  | 1.47 | 0.84 *    |
| Surf1         | surfeit gene 1                                                                                | 20930  | 1.23  | 1.18  | 0.88  | 1.39 | 0.46 ns   |
| Gnb2          | guanine nucleotide binding protein, beta 2                                                    | 14693  | 7.44  | 6.09  | 6.98  | 1.06 | 0.31 ns   |
| Manba         | mannosidase, beta A, lysosomal                                                                | 110173 | 0.94  | 0.98  | 0.77  | 1.22 | 0.20 ns   |
| Slc2a8        | solute carrier family 2, (facilitated glucose transporter), member 8                          | 56017  | 0.40  | 0.34  | 0.24  | 1.69 | 0.85 *    |
| LOC433749     |                                                                                               | 433749 | 5.53  | 4.82  | 5.46  | 1.01 | 0.45 ns   |
| LOC631743     |                                                                                               | 631743 | 5.53  | 4.82  | 5.46  | 1.01 | 0.45 ns   |
| Pdcd5         | programmed cell death 5                                                                       | 56330  | 2.87  | 3.32  | 3.73  | 0.76 | -0.13 ns  |
| 3110001I20Rik | RIKEN cDNA 3110001I20 gene                                                                    | 70354  | 0.83  | 0.88  | 1.22  | 0.68 | -0.74 ns  |
| Zfp36l1       | zinc finger protein 36, C3H type-like 1                                                       | 12192  | 6.41  | 7.26  | 6.26  | 1.02 | 0.11 ns   |
| Cyp51         | cytochrome P450, family 51                                                                    | 13121  | 2.06  | 1.90  | 2.46  | 0.84 | -0.43 ns  |
| Gng10         | guanine nucleotide binding protein (G protein), gamma 10                                      | 14700  | 1.29  | 1.43  | 1.15  | 1.12 | 0.32 ns   |
| Dhdds         | dehydrodolichyl diphosphate synthase                                                          | 67422  | 0.55  | 0.65  | 0.81  | 0.68 | -0.50 ns  |
| Ppie          | peptidylprolyl isomerase E (cyclophilin E)                                                    | 56031  | 0.49  | 0.64  | 0.53  | 0.91 | 0.07 ns   |
| Pts           | 6-pyruvoyl-tetrahydropterin synthase                                                          | 19286  | 1.04  | 1.01  | 0.70  | 1.48 | 0.86 *    |
| Gabpa         | GA repeat binding protein, alpha                                                              | 14390  | 1.59  | 1.53  | 1.99  | 0.79 | -0.69 ns  |
| Cs            | citrate synthase                                                                              | 12974  | 5.59  | 5.87  | 4.93  | 1.13 | 0.02 ns   |
| Hspe1         | heat shock protein 1 (chaperonin 10)                                                          | 15528  | 3.46  | 3.20  | 2.28  | 1.51 | 0.34 ns   |
| Map3k11       | mitogen activated protein kinase kinase kinase 11                                             | 26403  | 0.50  | 0.55  | 0.29  | 1.72 | 0.84 *    |
| Cdk5          | cyclin-dependent kinase 5                                                                     | 12568  | 0.73  | 0.66  | 0.77  | 0.94 | 0.11 ns   |
| Arpp19        | cAMP-regulated phosphoprotein 19                                                              | 59046  | 2.00  | 1.71  | 1.05  | 1.89 | 0.93 **   |
| Rgl2          | ral guanine nucleotide dissociation stimulator-like 2                                         | 19732  | 0.95  | 0.73  | 0.62  | 1.52 | 0.69 ns   |
| Ranbp2        | RAN binding protein 2                                                                         | 19386  | 2.55  | 2.15  | 1.84  | 1.38 | 0.36 ns   |
| Caskin2       | cask-interacting protein 2                                                                    | 140721 | 0.47  | 0.50  | 0.48  | 0.97 | 0.39 ns   |
| Kif4          | kinesin family member 4                                                                       | 16571  | 0.44  | 0.54  | 1.02  | 0.43 | -0.39 ns  |
| Fkbp2         | FK506 binding protein 2                                                                       | 14227  | 4.01  | 3.57  | 2.70  | 1.47 | 0.92 **   |
| Slc30a7       | solute carrier family 30 (zinc transporter), member 7                                         | 66500  | 0.51  | 0.55  | 0.55  | 0.94 | -0.26 ns  |
| Selenbp1      | selenium binding protein 1                                                                    | 20341  | 2.09  | 2.40  | 4.00  | 0.52 | -0.58 ns  |
| Cdc42ep3      | CDC42 effector protein (Rho GTPase binding) 3                                                 | 260409 | 0.71  | 0.57  | 0.26  | 2.66 | 0.61 ns   |
| Gtf2h2        | general transcription factor II H, polypeptide 2                                              | 23894  | 0.35  | 0.40  | 0.50  | 0.69 | -0.87 *   |
| Rdbp          | RD RNA-binding protein                                                                        | 27632  | 2.34  | 2.44  | 1.79  | 1.30 | 0.84 *    |
| Arl3          | ADP-ribosylation factor-like 3                                                                | 56350  | 3.55  | 3.19  | 2.30  | 1.54 | 0.91 *    |
| Brd4          | bromodomain containing 4                                                                      | 57261  | 2.91  | 2.61  | 1.83  | 1.58 | 0.93 **   |
| Azin1         | antizyme inhibitor 1                                                                          | 54375  | 1.54  | 1.33  | 1.70  | 0.90 | -0.03 ns  |
| Adamts1       | a disintegrin-like and metallopeptidase (reprolysin type) with thrombospondin type 1 motif, 1 | 11504  | 3.58  | 2.50  | 3.22  | 1.11 | -0.13 ns  |
| Acp1          | acid phosphatase 1, soluble                                                                   | 11431  | 5.24  | 5.18  | 5.58  | 0.93 | -0.11 ns  |
| Asah2         | N-acylsphingosine amidohydrolase 2                                                            | 54447  | 0.52  | 0.60  | 0.45  | 1.14 | -0.35 ns  |
| Poldip2       | polymerase (DNA-directed), delta interacting protein 2                                        | 67811  | 0.72  | 0.74  | 0.58  | 1.25 | 0.18 ns   |
| Hs2st1        | heparan sulfate 2-O-sulfotransferase 1                                                        | 23908  | 1.72  | 1.52  | 1.23  | 1.39 | 0.41 ns   |
| Tnfrsf21      | tumor necrosis factor receptor superfamily, member 21                                         | 94185  | 0.15  | 0.20  | 0.47  | 0.31 | -0.87 *   |
| Pno1          | partner of NOB1 homolog (S. cerevisiae)                                                       | 66249  | 1.22  | 1.28  | 1.35  | 0.90 | -0.73 ns  |
| Mapre1        | microtubule-associated protein, RP/EB family, member 1                                        | 13589  | 4.98  | 4.92  | 4.89  | 1.01 | 0.34 ns   |
| Ell2          | elongation factor RNA polymerase II 2                                                         | 192657 | 0.60  | 0.81  | 1.15  | 0.52 | -0.97 **  |

|               |                                                                                              |        |       |       |       |      |          |
|---------------|----------------------------------------------------------------------------------------------|--------|-------|-------|-------|------|----------|
| Keap1         | kelch-like ECH-associated protein 1                                                          | 50868  | 0.82  | 0.52  | 0.77  | 1.06 | 0.26 ns  |
| Agpat6        | 1-acylglycerol-3-phosphate O-acyltransferase 6 (lysophosphatidic acid acyltransferase, zeta) | 102247 | 0.80  | 0.79  | 0.83  | 0.96 | 0.32 ns  |
| Xrn2          | 5'-3' exoribonuclease 2                                                                      | 24128  | 0.91  | 0.97  | 1.13  | 0.80 | -0.42 ns |
| Wnt4          | wingless-related MMTV integration site 4                                                     | 22417  | 0.55  | 0.61  | 0.36  | 1.50 | 0.20 ns  |
| Ifit1         | interferon-induced protein with tetratricopeptide repeats 1                                  | 15957  | 0.17  | 0.19  | 1.78  | 0.09 | -0.72 ns |
| Syt8          | synaptotagmin VIII                                                                           | 55925  | 0.43  | 0.36  | 0.41  | 1.03 | 0.19 ns  |
| 2410018M08Rik |                                                                                              | 71970  | 5.72  | 5.05  | 7.32  | 0.78 | -0.36 ns |
| Ndufa7        | NADH dehydrogenase (ubiquinone) 1 alpha subcomplex, 7 (B14.5a)                               | 66416  | 5.78  | 4.95  | 4.15  | 1.39 | 0.72 ns  |
| Rpl39         | ribosomal protein L39                                                                        | 67248  | 23.73 | 24.27 | 17.73 | 1.33 | 0.84 *   |
| Cenpa         | centromere protein A                                                                         | 12615  | 2.47  | 2.54  | 3.28  | 0.75 | -0.12 ns |
| Serpinh1      | serine (or cysteine) peptidase inhibitor, clade H, member 1                                  | 12406  | 0.70  | 0.46  | 0.81  | 0.87 | -0.21 ns |
| Dap3          | death associated protein 3                                                                   | 65111  | 3.63  | 3.59  | 2.82  | 1.28 | 0.64 ns  |
| Wdr1          | WD repeat domain 1                                                                           | 22388  | 4.08  | 4.53  | 5.33  | 0.76 | -0.54 ns |
| Tle4          | transducin-like enhancer of split 4, homolog of Drosophila E(spl)                            | 21888  | 1.42  | 0.97  | 0.58  | 2.43 | 0.91 *   |
| Arvcf         | armadillo repeat gene deleted in velo-cardio-facial syndrome                                 | 11877  | 0.54  | 0.53  | 0.43  | 1.27 | 0.55 ns  |
| Lap3          | leucine aminopeptidase 3                                                                     | 66988  | 0.97  | 0.99  | 0.98  | 0.99 | 0.16 ns  |
| Rad54l        | RAD54 like (S. cerevisiae)                                                                   | 19366  | 0.63  | 0.72  | 0.86  | 0.73 | -0.09 ns |
| Mrpl17        | mitochondrial ribosomal protein L17                                                          | 27397  | 1.07  | 1.13  | 1.56  | 0.68 | -0.86 *  |
| Hgsnat        | heparan-alpha-glucosaminide N-acetyltransferase                                              | 52120  | 0.80  | 0.65  | 0.79  | 1.00 | -0.04 ns |
| Bcat1         | branched chain aminotransferase 1, cytosolic                                                 | 12035  | 0.89  | 0.74  | 0.11  | 8.23 | 0.27 ns  |
| Gtppb4        | GTP binding protein 4                                                                        | 69237  | 1.31  | 1.39  | 1.68  | 0.78 | -0.72 ns |
| BC005537      | cDNA sequence BC005537                                                                       | 79555  | 3.40  | 2.99  | 3.71  | 0.91 | -0.01 ns |
| Sri           | sorcini                                                                                      | 109552 | 2.57  | 2.28  | 2.26  | 1.13 | 0.65 ns  |
| Atp9b         | ATPase, class II, type 9B                                                                    | 50771  | 0.48  | 0.44  | 0.45  | 1.05 | 0.56 ns  |
| Mrpl16        | mitochondrial ribosomal protein L16                                                          | 94063  | 1.89  | 2.04  | 1.46  | 1.28 | 0.78 ns  |
| Dffa          | DNA fragmentation factor, alpha subunit                                                      | 13347  | 0.53  | 0.44  | 0.49  | 1.08 | -0.07 ns |
| Gsg2          | germ cell-specific gene 2                                                                    | 14841  | 0.29  | 0.29  | 0.39  | 0.72 | -0.41 ns |
| Rqcd1         | rcd1 (required for cell differentiation) homolog 1 (S. pombe)                                | 58184  | 1.85  | 1.64  | 1.39  | 1.33 | 0.86 *   |
| Hlft          | helicase-like transcription factor                                                           | 20585  | 1.28  | 1.12  | 1.00  | 1.27 | 0.33 ns  |
| Srp19         | signal recognition particle 19                                                               | 66384  | 1.46  | 1.51  | 1.42  | 1.02 | 0.45 ns  |
| Usp4          | ubiquitin specific peptidase 4 (proto-oncogene)                                              | 22258  | 0.62  | 0.70  | 0.70  | 0.88 | 0.25 ns  |
| Ubpap1        | ubiquitin-associated protein 1                                                               | 67123  | 0.50  | 0.50  | 0.55  | 0.91 | -0.43 ns |
| Ap2m1         | adaptor protein complex AP-2, mu1                                                            | 11773  | 7.75  | 6.95  | 8.26  | 0.93 | -0.14 ns |
| Arhgap5       | Rho GTPase activating protein 5                                                              | 11855  | 2.68  | 2.90  | 3.46  | 0.77 | -0.84 *  |
| Nedd1         | neural precursor cell expressed, developmentally down-regulated gene 1                       | 17997  | 1.26  | 0.91  | 0.95  | 1.32 | 0.49 ns  |
| Smek2         | SMEK homolog 2, suppressor of mek1 (Dictyostelium)                                           | 104570 | 1.15  | 0.92  | 1.06  | 1.08 | 0.18 ns  |
| Eif4e         |                                                                                              | 13684  | 3.52  | 3.49  | 3.23  | 1.08 | -0.16 ns |
| LOC630527     |                                                                                              | 630527 | 3.52  | 3.49  | 3.23  | 1.08 | -0.16 ns |
| Ppib          | peptidylprolyl isomerase B                                                                   | 19035  | 7.55  | 6.41  | 5.85  | 1.28 | 0.85 *   |
| B4galt6       |                                                                                              | 56386  | 0.23  | 0.40  | 0.16  | 1.40 | 0.28 ns  |
| Ppp1r14b      | protein phosphatase 1, regulatory (inhibitor) subunit 14B                                    | 18938  | 5.55  | 5.50  | 3.90  | 1.41 | 0.91 *   |
| Stau2         | staufen (RNA binding protein) homolog 2 (Drosophila)                                         | 29819  | 0.32  | 0.31  | 0.30  | 1.07 | -0.17 ns |
| Src           | Rous sarcoma oncogene                                                                        | 20779  | 0.46  | 0.46  | 0.48  | 0.97 | -0.44 ns |
| Mpp1          | membrane protein, palmitoylated                                                              | 17524  | 0.52  | 0.49  | 0.73  | 0.72 | -0.15 ns |
| Ccnb2         | cyclin B2                                                                                    | 12442  | 2.86  | 2.34  | 2.56  | 1.11 | 0.63 ns  |
| Eif4a2        | eukaryotic translation initiation factor 4A2                                                 | 13682  | 13.06 | 12.42 | 9.00  | 1.44 | 0.59 ns  |
| Lin7c         | lin-7 homolog C (C. elegans)                                                                 | 22343  | 2.01  | 1.66  | 1.38  | 1.45 | 0.73 ns  |
| Sdcbp         | syndecan binding protein                                                                     | 53378  | 0.87  | 0.73  | 0.77  | 1.12 | -0.31 ns |
| 2610528J11Rik | RIKEN cDNA 2610528J11 gene                                                                   | 66451  | 0.57  | 0.53  | 0.74  | 0.76 | -0.70 ns |
| Katna1        | katanin p60 (ATPase-containing) subunit A1                                                   | 23924  | 1.27  | 1.29  | 1.08  | 1.17 | -0.06 ns |
| Smc3          | structural maintenance of chromosomes 3                                                      | 13006  | 3.15  | 3.34  | 2.30  | 1.36 | 0.66 ns  |
| Ciao1         | cytosolic iron-sulfur protein assembly 1 homolog (S. cerevisiae)                             | 26371  | 1.27  | 1.14  | 1.17  | 1.08 | 0.61 ns  |
| Yme1l1        | YME1-like 1 (S. cerevisiae)                                                                  | 27377  | 1.20  | 0.97  | 0.62  | 1.91 | 0.68 ns  |
| Sqstm1        | sequestosome 1                                                                               | 18412  | 5.56  | 4.55  | 5.26  | 1.05 | 0.13 ns  |
| Tm4sf1        | transmembrane 4 superfamily member 1                                                         | 17112  | 0.37  | 0.78  | 1.64  | 0.23 | -0.80 ns |
| D930014E17Rik | RIKEN cDNA D930014E17 gene                                                                   | 57373  | 0.81  | 0.79  | 0.94  | 0.86 | -0.58 ns |
| Tex261        | testis expressed gene 261                                                                    | 21766  | 1.25  | 0.99  | 1.45  | 0.85 | -0.22 ns |
| Crot          | carnitine O-octanoyltransferase                                                              | 74114  | 0.86  | 0.76  | 0.75  | 1.14 | 0.32 ns  |
| Ptplad2       | protein tyrosine phosphatase-like A domain containing 2                                      | 66775  | 0.47  | 0.62  | 0.14  | 3.31 | 0.54 ns  |
| Uqcfs1        | ubiquinol-cytochrome c reductase, Rieske iron-sulfur polypeptide 1                           | 66694  | 3.44  | 3.15  | 3.98  | 0.86 | -0.17 ns |
| Pccb          | propionyl Coenzyme A carboxylase, beta polypeptide                                           | 66904  | 0.44  | 0.38  | 0.31  | 1.38 | 0.68 ns  |
| Got1          | glutamate oxaloacetate transaminase 1, soluble                                               | 14718  | 1.33  | 1.39  | 1.02  | 1.30 | 0.60 ns  |
| Gadd45b       | growth arrest and DNA-damage-inducible 45 beta                                               | 17873  | 1.14  | 1.08  | 1.08  | 1.05 | -0.23 ns |
| Gtppb3        | GTP binding protein 3                                                                        | 70359  | 0.24  | 0.31  | 0.43  | 0.56 | -0.81 ns |
| Cnn2          | calponin 2                                                                                   | 12798  | 5.39  | 4.78  | 3.01  | 1.78 | 0.63 ns  |
| Akap8         | A kinase (PRKA) anchor protein 8                                                             | 56399  | 1.86  | 1.68  | 1.22  | 1.51 | 0.74 ns  |
| Tjp2          | tight junction protein 2                                                                     | 21873  | 3.36  | 3.57  | 2.48  | 1.35 | 0.79 ns  |
| Nol5          | nucleolar protein 5                                                                          | 55989  | 1.08  | 1.25  | 0.81  | 1.34 | 0.39 ns  |
| 2310004I24Rik | RIKEN cDNA 2310004I24 gene                                                                   | 66358  | 0.40  | 0.43  | 0.40  | 0.98 | -0.45 ns |
| Pask          | PAS domain containing serine/threonine kinase                                                | 269224 | 0.59  | 0.56  | 0.47  | 1.24 | 0.20 ns  |
| Tmem126a      | transmembrane protein 126A                                                                   | 66271  | 1.37  | 1.21  | 1.29  | 1.06 | 0.48 ns  |
| Aco2          | aconitase 2, mitochondrial                                                                   | 11429  | 4.48  | 3.97  | 4.47  | 1.00 | 0.28 ns  |
| Zfp358        | zinc finger protein 358                                                                      | 140482 | 0.41  | 0.25  | 0.30  | 1.35 | 0.63 ns  |
| Ifrd2         | interferon-related developmental regulator 2                                                 | 15983  | 0.36  | 0.43  | 0.43  | 0.83 | 0.25 ns  |
| Klf5          | Kruppel-like factor 5                                                                        | 12224  | 3.15  | 3.03  | 2.88  | 1.09 | 0.40 ns  |
| Ftsj3         | FtsJ homolog 3 (E. coli)                                                                     | 56095  | 0.44  | 0.62  | 0.57  | 0.78 | -0.12 ns |
| Spg21         | spastic paraplegia 21 homolog (human)                                                        | 27965  | 1.11  | 1.10  | 1.06  | 1.04 | 0.61 ns  |
| Ptpn9         | protein tyrosine phosphatase, non-receptor type 9                                            | 56294  | 0.81  | 0.74  | 0.78  | 1.04 | 0.50 ns  |
| 2610027L16Rik | RIKEN cDNA 2610027L16 gene                                                                   | 67842  | 0.69  | 0.81  | 0.87  | 0.79 | -0.48 ns |
| Dtd1          | D-tyrosyl-tRNA deacylase 1 homolog (S. cerevisiae)                                           | 66044  | 0.70  | 0.64  | 0.49  | 1.43 | 0.53 ns  |
| Mina          | myc induced nuclear antigen                                                                  | 67014  | 0.85  | 0.91  | 0.87  | 0.97 | -0.48 ns |
| Sip1          | survivor of motor neuron protein interacting protein 1                                       | 66603  | 0.64  | 0.75  | 0.92  | 0.69 | -0.67 ns |
| Zfp1          | zinc finger protein, multitype 1                                                             | 22761  | 0.34  | 0.44  | 0.18  | 1.91 | 0.32 ns  |
| Bcap31        | B-cell receptor-associated protein 31                                                        | 27061  | 3.99  | 3.78  | 5.91  | 0.67 | -0.42 ns |
| Nt5c3         | 5'-nucleotidase, cytosolic III                                                               | 107569 | 0.79  | 1.01  | 1.16  | 0.68 | -0.93 ** |
| Cog8          | component of oligomeric golgi complex 8                                                      | 97484  | 1.05  | 1.15  | 0.61  | 1.73 | 0.64 ns  |

|               |                                                                                     |        |       |       |       |      |          |
|---------------|-------------------------------------------------------------------------------------|--------|-------|-------|-------|------|----------|
| Psmid7        | proteasome (prosome, macropain) 26S subunit, non-ATPase, 7                          | 17463  | 1.00  | 1.13  | 0.72  | 1.39 | 0.74 ns  |
| Dnm2          | dynamain 2                                                                          | 13430  | 0.65  | 0.49  | 0.59  | 1.10 | 0.57 ns  |
| Mcts2         | malignant T cell amplified sequence 2                                               | 66405  | 0.48  | 0.47  | 0.44  | 1.10 | 0.06 ns  |
| Stxbp4        | syntaxin binding protein 4                                                          | 20913  | 0.65  | 0.60  | 0.41  | 1.56 | 0.12 ns  |
| Psat1         | phosphoserine aminotransferase 1                                                    | 107272 | 5.98  | 6.97  | 5.29  | 1.12 | 0.37 ns  |
| Sgta          | small glutamine-rich tetratricopeptide repeat (TPR)-containing, alpha               | 52551  | 1.88  | 1.69  | 1.45  | 1.29 | 0.98 *** |
| Rps25         | ribosomal protein S25                                                               | 75617  | 14.32 | 12.51 | 11.42 | 1.25 | 0.87 *   |
| Gdi1          | guanosine diphosphate (GDP) dissociation inhibitor 1                                | 14567  | 1.32  | 1.39  | 2.50  | 0.53 | -0.77 ns |
| Atp1a1        | ATPase, Na+/K+ transporting, alpha 1 polypeptide                                    | 11928  | 8.83  | 9.40  | 8.73  | 1.01 | -0.46 ns |
| Spp13         | signal peptide peptidase 3                                                          | 74585  | 0.96  | 1.23  | 0.99  | 0.96 | -0.14 ns |
| Rnf13         | ring finger protein 13                                                              | 24017  | 1.64  | 1.63  | 1.41  | 1.15 | -0.03 ns |
| Ctdsp2        | CTD (carboxy-terminal domain, RNA polymerase II, polypeptide A) small phosphatase 2 | 52468  | 7.24  | 5.94  | 4.71  | 1.53 | 0.53 ns  |
| EG665407      |                                                                                     | 665407 | 1.01  | 1.18  | 1.14  | 0.89 | -0.16 ns |
| Usp1          | ubiquitin specific peptidase 1                                                      | 230484 | 4.20  | 4.35  | 4.14  | 1.01 | 0.31 ns  |
| 1300018105Rik | RIKEN cDNA 1300018105 gene                                                          | 74157  | 0.93  | 0.75  | 0.82  | 1.12 | 0.68 ns  |
| Aars          | alanyl-tRNA synthetase                                                              | 234734 | 3.56  | 3.99  | 2.22  | 1.60 | 0.62 ns  |
| Etfdh         | electron transferring flavoprotein, dehydrogenase                                   | 66841  | 1.34  | 1.42  | 1.41  | 0.95 | 0.26 ns  |
| Rac1          | RAS-related C3 botulinum substrate 1                                                | 19353  | 9.45  | 7.78  | 8.90  | 1.06 | 0.19 ns  |
| Oxa1l         | oxidase assembly 1-like                                                             | 69089  | 0.67  | 0.53  | 0.56  | 1.19 | 0.25 ns  |
| Arcn1         | archain 1                                                                           | 213827 | 3.03  | 2.47  | 2.39  | 1.27 | 0.86 *   |
| Asns          | asparagine synthetase                                                               | 27053  | 3.13  | 3.78  | 3.37  | 0.92 | 0.00 ns  |
| Ndufs2        | NADH dehydrogenase (ubiquinone) Fe-S protein 2                                      | 226646 | 4.37  | 4.33  | 3.54  | 1.23 | 0.33 ns  |
| Vasp          | vasodilator-stimulated phosphoprotein                                               | 22323  | 1.31  | 1.62  | 2.12  | 0.62 | -0.84 *  |
| Chmp1a        | chromatin modifying protein 1A                                                      | 234852 | 1.25  | 1.37  | 1.04  | 1.19 | 0.65 ns  |
| Mbc2          | membrane bound C2 domain containing protein                                         | 23943  | 0.99  | 1.08  | 0.62  | 1.58 | 0.45 ns  |
| Rps28         | ribosomal protein S28                                                               | 54127  | 27.63 | 26.24 | 19.19 | 1.43 | 0.85 *   |
| Cnot8         | CCR4-NOT transcription complex, subunit 8                                           | 69125  | 0.85  | 0.84  | 0.84  | 1.01 | 0.25 ns  |
| D14Erd500e    | DNA segment, Chr 14, ERATO Doi 500, expressed                                       | 219072 | 1.59  | 1.81  | 1.82  | 0.87 | -0.33 ns |
| Snrp70        | U1 small nuclear ribonucleoprotein polypeptide A                                    | 20637  | 0.89  | 0.96  | 1.14  | 0.78 | -0.36 ns |
| Dap           | death-associated protein                                                            | 223453 | 3.35  | 3.87  | 4.72  | 0.71 | -0.81 ns |
| Cmtm6         | CKLF-like MARVEL transmembrane domain containing 6                                  | 67213  | 0.70  | 0.75  | 0.78  | 0.89 | 0.33 ns  |
| Pias3         | protein inhibitor of activated STAT 3                                               | 229615 | 0.72  | 0.61  | 0.62  | 1.15 | -0.06 ns |
| Tom11l        | target of myb1-like 1 (chicken)                                                     | 71943  | 0.44  | 0.45  | 0.38  | 1.17 | 0.22 ns  |
| Idi1          | isopentenyl-diphosphate delta isomerase                                             | 319554 | 3.11  | 2.53  | 2.49  | 1.25 | 0.69 ns  |
| C330016O10Rik | RIKEN cDNA C330016O10 gene                                                          | 212706 | 0.28  | 0.28  | 0.44  | 0.65 | -0.85 *  |
| Sod1          | superoxide dismutase 1, soluble                                                     | 20655  | 7.13  | 6.57  | 6.20  | 1.14 | 0.46 ns  |
| Paip2b        | poly(A) binding protein interacting protein 2B                                      | 232164 | 1.81  | 1.70  | 1.52  | 1.18 | 0.57 ns  |
| Pbxip1        | pre-B-cell leukemia transcription factor interacting protein 1                      | 229534 | 1.22  | 1.09  | 0.51  | 2.39 | 0.53 ns  |
| Tm2d2         | TM2 domain containing 2                                                             | 69742  | 1.17  | 1.11  | 1.02  | 1.14 | 0.95 **  |
| Gtf2b         | general transcription factor IIB                                                    | 229906 | 1.60  | 1.28  | 1.15  | 1.38 | 0.36 ns  |
| Mier2         | mesoderm induction early response 1, family member 2                                | 70427  | 0.40  | 0.30  | 0.43  | 0.94 | -0.42 ns |
| Prkag2        | protein kinase, AMP-activated, gamma 2 non-catalytic subunit                        | 108099 | 0.35  | 0.30  | 0.31  | 1.14 | 0.12 ns  |
| Mettl8        | methyltransferase like 8                                                            | 228019 | 0.36  | 0.32  | 0.19  | 1.84 | 0.16 ns  |
| Exoc1         | exocyst complex component 1                                                         | 69940  | 0.65  | 0.68  | 0.81  | 0.80 | -0.86 *  |
| 1110006G06Rik | RIKEN cDNA 1110006G06 gene                                                          | 73833  | 0.38  | 0.26  | 0.37  | 1.01 | -0.15 ns |
| Bxdc2         | brix domain containing 2                                                            | 67832  | 2.41  | 2.12  | 2.48  | 0.97 | -0.02 ns |
| Tmem111       | transmembrane protein 111                                                           | 66087  | 2.82  | 2.91  | 3.04  | 0.92 | -0.08 ns |
| Zfp386        |                                                                                     | 56220  | 1.15  | 1.10  | 1.23  | 0.93 | -0.53 ns |
| Pgm2          | phosphoglucomutase 2                                                                | 72157  | 1.31  | 1.29  | 2.22  | 0.59 | -0.55 ns |
| Zfp410        | zinc finger protein 410                                                             | 52708  | 1.47  | 1.81  | 2.48  | 0.59 | -0.78 ns |
| Pvr           | poliovirus receptor                                                                 | 52118  | 0.24  | 0.27  | 0.63  | 0.38 | -0.62 ns |
| Hsbp1         | heat shock factor binding protein 1                                                 | 68196  | 3.32  | 3.24  | 3.04  | 1.09 | 0.72 ns  |
| Tinf2         | Terf1 (TRF1)-interacting nuclear factor 2                                           | 28113  | 0.83  | 0.82  | 1.20  | 0.69 | -0.57 ns |
| Mrps18b       | mitochondrial ribosomal protein S18B                                                | 66973  | 1.32  | 1.21  | 0.78  | 1.69 | 0.85 *   |
| Ccdc101       | coiled-coil domain containing 101                                                   | 75565  | 0.33  | 0.45  | 0.42  | 0.77 | -0.01 ns |
| Arhgdia       | Rho GDP dissociation inhibitor (GDI) alpha                                          | 192662 | 6.10  | 5.50  | 5.38  | 1.13 | 0.72 ns  |
| Nomo1         | nodal modulator 1                                                                   | 211548 | 0.85  | 0.84  | 1.11  | 0.76 | -0.40 ns |
| 2310008H04Rik | RIKEN cDNA 2310008H04 gene                                                          | 224008 | 0.79  | 0.69  | 1.07  | 0.73 | -0.43 ns |
| Spcs3         | signal peptidase complex subunit 3 homolog (S. cerevisiae)                          | 76687  | 2.55  | 2.55  | 2.62  | 0.97 | 0.34 ns  |
| D430028G21Rik | RIKEN cDNA D430028G21 gene                                                          | 228607 | 0.64  | 0.52  | 0.63  | 1.01 | -0.31 ns |
| Dnajb4        | DnaJ (Hsp40) homolog, subfamily B, member 4                                         | 67035  | 1.19  | 1.06  | 0.62  | 1.91 | 0.18 ns  |
| Mrp153        | mitochondrial ribosomal protein L53                                                 | 68499  | 1.40  | 1.47  | 1.97  | 0.71 | -0.76 ns |
| Tmem121       | transmembrane protein 121                                                           | 69195  | 0.27  | 0.33  | 0.50  | 0.55 | -0.40 ns |
| Ankrd54       | ankyrin repeat domain 54                                                            | 223690 | 1.01  | 0.94  | 1.07  | 0.93 | -0.12 ns |
| EG627828      |                                                                                     | 627828 | 6.39  | 6.80  | 5.63  | 1.13 | 0.56 ns  |
| 0610037P05Rik | RIKEN cDNA 0610037P05 gene                                                          | 66086  | 2.13  | 1.89  | 2.11  | 1.01 | -0.24 ns |
| Wdr26         | WD repeat domain 26                                                                 | 226757 | 3.30  | 3.44  | 2.85  | 1.15 | -0.22 ns |
| Zswim1        | zinc finger, SWIM domain containing 1                                               | 71971  | 0.54  | 0.51  | 0.53  | 1.00 | -0.44 ns |
| Sbk1          | SH3-binding kinase 1                                                                | 104175 | 0.57  | 0.45  | 0.60  | 0.95 | -0.28 ns |
| Crabp2        | cellular retinoic acid binding protein II                                           | 12904  | 1.14  | 1.21  | 0.27  | 4.25 | 0.60 ns  |
| Ttc4          | tetratricopeptide repeat domain 4                                                   | 72354  | 0.54  | 0.46  | 0.51  | 1.05 | -0.06 ns |
| Ypel5         | yippepe-like 5 (Drosophila)                                                         | 383295 | 0.80  | 0.62  | 0.36  | 2.24 | 0.85 *   |
| Qtrtd1        | queuine tRNA-ribosyltransferase domain containing 1                                 | 106248 | 0.58  | 0.65  | 0.72  | 0.79 | -0.93 ** |
| Rnh1          | ribonuclease/angiogenin inhibitor 1                                                 | 107702 | 2.02  | 1.97  | 2.07  | 0.97 | 0.11 ns  |
| C330007P06Rik | RIKEN cDNA C330007P06 gene                                                          | 77644  | 1.08  | 1.09  | 1.30  | 0.83 | -0.45 ns |
| Mb            | myoglobin                                                                           | 17189  | 0.07  | 0.11  | 0.41  | 0.16 | -0.68 ns |
| Psmb4         | proteasome (prosome, macropain) subunit, beta type 4                                | 19172  | 8.92  | 9.33  | 7.83  | 1.13 | 0.65 ns  |
| Cbara1        | calcium binding atopy-related autoantigen 1                                         | 216001 | 1.01  | 0.80  | 0.67  | 1.51 | 0.28 ns  |
| Lass5         | longevity assurance homolog 5 (S. cerevisiae)                                       | 71949  | 5.94  | 6.22  | 5.86  | 1.01 | -0.24 ns |
| Ppap2c        | phosphatidic acid phosphatase type 2c                                               | 50784  | 6.66  | 6.27  | 5.34  | 1.24 | -0.07 ns |
| Kbtbd2        | kelch repeat and BTB (POZ) domain containing 2                                      | 210973 | 1.64  | 1.64  | 2.13  | 0.77 | -0.83 *  |
| Zfp330        | zinc finger protein 330                                                             | 30932  | 0.93  | 1.08  | 1.17  | 0.79 | -0.11 ns |
| Immp11        | IMP1 inner mitochondrial membrane peptidase-like (S. cerevisiae)                    | 66541  | 1.62  | 1.29  | 1.23  | 1.31 | 0.54 ns  |
| Edem1         | ER degradation enhancer, mannosidase alpha-like 1                                   | 192193 | 0.45  | 0.46  | 0.60  | 0.76 | -0.41 ns |
| Ormdl1        | ORM1-like 1 (S. cerevisiae)                                                         | 227102 | 1.50  | 1.57  | 1.31  | 1.14 | 0.40 ns  |
| Wdr20a        | WD repeat domain 20a                                                                | 69641  | 1.83  | 1.96  | 1.71  | 1.06 | -0.44 ns |

|               |                                                                                             |        |       |       |       |      |          |
|---------------|---------------------------------------------------------------------------------------------|--------|-------|-------|-------|------|----------|
| Btf3l4        | basic transcription factor 3-like 4                                                         | 70533  | 0.75  | 0.99  | 0.99  | 0.76 | -0.83 *  |
| Scamp5        | secretory carrier membrane protein 5                                                        | 56807  | 0.95  | 0.80  | 0.25  | 3.73 | 0.61 ns  |
| Ptpn11        | protein tyrosine phosphatase, non-receptor type 11                                          | 19247  | 3.14  | 3.40  | 4.10  | 0.76 | -0.33 ns |
| Hdac11        | histone deacetylase 11                                                                      | 232232 | 0.61  | 0.43  | 0.36  | 1.69 | 0.14 ns  |
| Wbp5          | WW domain binding protein 5                                                                 | 22381  | 16.64 | 16.07 | 15.67 | 1.06 | 0.55 ns  |
| Cul2          | cullin 2                                                                                    | 71745  | 0.98  | 0.98  | 1.14  | 0.86 | 0.22 ns  |
| Traf2         | Tnf receptor-associated factor 2                                                            | 22030  | 0.42  | 0.39  | 0.46  | 0.92 | -0.62 ns |
| BC021381      | cDNA sequence BC021381                                                                      | 212483 | 0.84  | 0.84  | 0.89  | 0.94 | 0.24 ns  |
| Rbm7          | RNA binding motif protein 7                                                                 | 67010  | 3.78  | 3.13  | 3.08  | 1.22 | 0.79 ns  |
| Rnpep         | arginyl aminopeptidase (aminopeptidase B)                                                   | 215615 | 0.65  | 0.64  | 0.51  | 1.28 | -0.05 ns |
| Zfp422        | zinc finger protein 422                                                                     | 67255  | 0.57  | 0.65  | 0.53  | 1.07 | -0.03 ns |
| Mfsd1         | major facilitator superfamily domain containing 1                                           | 66868  | 2.22  | 2.10  | 1.37  | 1.61 | 0.17 ns  |
| Prmt7         | protein arginine N-methyltransferase 7                                                      | 214572 | 0.60  | 0.58  | 0.54  | 1.10 | 0.71 ns  |
| Appbp2        | amyloid beta precursor protein (cytoplasmic tail) binding protein 2                         | 66884  | 2.69  | 2.79  | 2.94  | 0.91 | -0.65 ns |
| Irf2bp1       | interferon regulatory factor 2 binding protein 1                                            | 272359 | 0.81  | 0.77  | 0.71  | 1.14 | 0.13 ns  |
| Pxk           | PX domain containing serine/threonine kinase                                                | 218699 | 0.60  | 0.53  | 0.82  | 0.72 | -0.57 ns |
| Ikbkap        | inhibitor of kappa light polypeptide enhancer in B-cells, kinase complex-associated protein | 230233 | 1.04  | 1.28  | 1.39  | 0.74 | -0.81 *  |
| Lsr           | lipolysis stimulated lipoprotein receptor                                                   | 54135  | 0.96  | 1.06  | 1.02  | 0.94 | 0.29 ns  |
| Rexo2         | REX2, RNA exonuclease 2 homolog (S. cerevisiae)                                             | 104444 | 1.50  | 1.23  | 0.86  | 1.74 | 0.85 *   |
| Frm6          | FERM domain containing 6                                                                    | 319710 | 0.88  | 0.99  | 1.16  | 0.76 | 0.01 ns  |
| Ccdc115       | coiled-coil domain containing 115                                                           | 69668  | 0.48  | 0.50  | 0.36  | 1.33 | 0.50 ns  |
| Pdzd11        | PDZ domain containing 11                                                                    | 72621  | 0.42  | 0.35  | 0.73  | 0.57 | -0.59 ns |
| Ogdh          | oxoglutarate dehydrogenase (lipoamide)                                                      | 18293  | 1.26  | 1.27  | 1.43  | 0.88 | -0.75 ns |
| Zadh2         | zinc binding alcohol dehydrogenase, domain containing 2                                     | 225791 | 0.72  | 0.80  | 0.69  | 1.04 | 0.50 ns  |
| Yip3          | Yip1 domain family, member 3                                                                | 28064  | 0.64  | 0.69  | 0.53  | 1.21 | 0.56 ns  |
| Fus           | fusion, derived from t(12;16) malignant liposarcoma (human)                                 | 233908 | 3.26  | 3.82  | 3.14  | 1.03 | 0.48 ns  |
| Obfc2b        | oligonucleotide/oligosaccharide-binding fold containing 2B                                  | 69917  | 1.06  | 0.87  | 0.79  | 1.33 | 0.23 ns  |
| Zfp212        | Zinc finger protein 212                                                                     | 232784 | 0.69  | 0.80  | 0.66  | 1.04 | 0.35 ns  |
| Snrpe         | small nuclear ribonucleoprotein E                                                           | 20643  | 10.82 | 10.99 | 9.63  | 1.12 | 0.38 ns  |
| Chd4          | chromodomain helicase DNA binding protein 4                                                 | 107932 | 2.38  | 2.33  | 2.37  | 1.00 | 0.00 ns  |
| Pabpc4        |                                                                                             | 230721 | 1.92  | 1.80  | 1.40  | 1.36 | 0.77 ns  |
| Chmp7         | CHMP family, member 7                                                                       | 105513 | 0.69  | 0.68  | 0.61  | 1.13 | 0.86 *   |
| 1110012L19Rik | RIKEN cDNA 1110012L19 gene                                                                  | 68618  | 0.37  | 0.38  | 0.64  | 0.58 | -0.68 ns |
| BC002230      | cDNA sequence BC002230                                                                      | 217827 | 0.83  | 0.80  | 0.74  | 1.12 | 0.07 ns  |
| Cdca7l        | cell division cycle associated 7 like                                                       | 217946 | 1.93  | 1.95  | 1.77  | 1.09 | -0.04 ns |
| Mrpl14        | mitochondrial ribosomal protein L14                                                         | 68463  | 1.58  | 1.23  | 1.09  | 1.44 | 0.93 **  |
| Arhgap1       | Rho GTPase activating protein 1                                                             | 228359 | 1.20  | 0.90  | 0.62  | 1.95 | 0.50 ns  |
| Ctsl          | cathepsin L                                                                                 | 13039  | 2.44  | 4.02  | 6.76  | 0.36 | -0.77 ns |
| Tmem101       | transmembrane protein 101                                                                   | 76547  | 0.50  | 0.46  | 0.48  | 1.04 | 0.60 ns  |
| Picalm        | phosphatidylinositol binding clathrin assembly protein                                      | 233489 | 3.86  | 3.62  | 3.61  | 1.06 | 0.22 ns  |
| Ythdf2        | YTH domain family 2                                                                         | 213541 | 1.48  | 1.57  | 1.59  | 0.93 | -0.71 ns |
| Senp1         | SUMO1/sentrin specific peptidase 1                                                          | 223870 | 0.88  | 0.93  | 1.09  | 0.80 | -0.70 ns |
| Rbm43         | RNA binding motif protein 43                                                                | 71684  | 0.52  | 0.54  | 0.56  | 0.93 | 0.15 ns  |
| Zfp7          | zinc finger protein 7                                                                       | 223669 | 1.23  | 1.07  | 1.11  | 1.10 | -0.14 ns |
| Abhd14b       | abhydrolase domain containing 14b                                                           | 76491  | 1.37  | 1.01  | 0.54  | 2.55 | 0.61 ns  |
| Tmed1         | transmembrane emp24 domain containing 1                                                     | 17083  | 0.72  | 0.65  | 0.67  | 1.07 | 0.38 ns  |
| Pcnx13        | pecanex-like 3 (Drosophila)                                                                 | 104401 | 1.85  | 1.73  | 1.29  | 1.43 | 0.87 *   |
| Inpp5b        | inositol polyphosphate-5-phosphatase B                                                      | 16330  | 0.73  | 0.63  | 0.73  | 0.99 | -0.10 ns |
| 1810009O10Rik | RIKEN cDNA 1810009O10 gene                                                                  | 69109  | 0.30  | 0.34  | 0.30  | 1.01 | -0.41 ns |
| Plac8         | placenta-specific 8                                                                         | 231507 | 2.10  | 2.63  | 5.61  | 0.37 | -0.85 *  |
| Psmf1         | proteasome (prosome, macropain) inhibitor subunit 1                                         | 228769 | 0.75  | 0.69  | 0.98  | 0.77 | -0.61 ns |
| Suox          | sulfite oxidase                                                                             | 211389 | 0.28  | 0.27  | 0.29  | 0.95 | -0.15 ns |
| Vps36         | vacuolar protein sorting 36 (yeast)                                                         | 70160  | 0.80  | 0.80  | 1.12  | 0.71 | -0.67 ns |
| Mta3          | metastasis associated 3                                                                     | 116871 | 1.03  | 0.80  | 0.80  | 1.29 | 0.71 ns  |
| Anp32e        | acidic (leucine-rich) nuclear phosphoprotein 32 family, member E                            | 66471  | 4.57  | 4.83  | 4.39  | 1.04 | 0.47 ns  |
| Mpnd          | MPN domain containing                                                                       | 68047  | 2.20  | 1.99  | 1.40  | 1.56 | 0.85 *   |
| Racgap1       | Rac GTPase-activating protein 1                                                             | 26934  | 2.01  | 1.91  | 2.55  | 0.78 | 0.00 ns  |
| Dennd2d       | DENN/MADD domain containing 2D                                                              | 72121  | 0.33  | 0.51  | 0.26  | 1.28 | 0.12 ns  |
| Polr3gl       | polymerase (RNA) III (DNA directed) polypeptide G like                                      | 69870  | 0.82  | 0.77  | 0.60  | 1.36 | 0.60 ns  |
| Rbm19         | RNA binding motif protein 19                                                                | 74111  | 0.43  | 0.54  | 0.44  | 0.97 | 0.23 ns  |
| Cops6         | COP9 (constitutive photomorphogenic) homolog, subunit 6 (Arabidopsis thaliana)              | 26893  | 3.42  | 3.60  | 4.09  | 0.83 | -0.52 ns |
| Alg1          | asparagine-linked glycosylation 1 homolog (yeast, beta-1,4-mannosyltransferase)             | 208211 | 0.47  | 0.46  | 0.69  | 0.68 | -0.66 ns |
| Commd5        | COMM domain containing 5                                                                    | 66398  | 0.69  | 0.68  | 0.70  | 0.98 | -0.41 ns |
| Ehf           | ets homologous factor                                                                       | 13661  | 2.59  | 2.23  | 2.40  | 1.07 | -0.42 ns |
| Aaas          | achalasia, adrenocortical insufficiency, alacrimia                                          | 223921 | 1.26  | 1.26  | 1.93  | 0.65 | -0.84 *  |
| Zfyve19       | zinc finger, FYVE domain containing 19                                                      | 72008  | 0.65  | 0.61  | 0.61  | 1.07 | -0.01 ns |
| Chac1         | ChaC, cation transport regulator-like 1 (E. coli)                                           | 69065  | 1.89  | 1.53  | 1.04  | 1.81 | 0.61 ns  |
| 2310056P07Rik | RIKEN cDNA 2310056P07 gene                                                                  | 70186  | 6.52  | 6.47  | 9.57  | 0.68 | -0.52 ns |
| Blvrb         | biliverdin reductase B (flavin reductase (NADPH))                                           | 233016 | 0.41  | 0.41  | 0.45  | 0.92 | -0.04 ns |
| Cuta          | cutA divalent cation tolerance homolog (E. coli)                                            | 67675  | 1.90  | 1.57  | 1.07  | 1.77 | 0.99 *** |
| Atp11b        | ATPase, Class VI, type 11B                                                                  | 76295  | 2.16  | 2.28  | 2.78  | 0.77 | -0.87 *  |
| Zfand2b       | zinc finger, AN1 type domain 2B                                                             | 68818  | 0.39  | 0.39  | 0.38  | 1.02 | -0.49 ns |
| 2700050L05Rik | RIKEN cDNA 2700050L05 gene                                                                  | 214764 | 0.31  | 0.37  | 0.38  | 0.82 | -0.84 *  |
| Pex26         | peroxisome biogenesis factor 26                                                             | 74043  | 0.46  | 0.51  | 0.55  | 0.84 | -0.36 ns |
| Cbr4          | carbonyl reductase 4                                                                        | 234309 | 0.83  | 0.98  | 1.28  | 0.64 | -0.86 *  |
| Pnkd          | paroxysmal nonkinesinogenic dyskinesia                                                      | 56695  | 0.92  | 0.86  | 0.69  | 1.32 | 0.69 ns  |
| Ecd           | ecdysoneless homolog (Drosophila)                                                           | 70601  | 1.27  | 1.20  | 1.02  | 1.23 | -0.07 ns |
| Pcca          | propionyl-Coenzyme A carboxylase, alpha polypeptide                                         | 110821 | 0.76  | 0.66  | 0.47  | 1.60 | 0.77 ns  |
| Ift20         | intraflagellar transport 20 homolog (Chlamydomonas)                                         | 55978  | 0.58  | 0.56  | 0.52  | 1.11 | 0.53 ns  |
| Cast          | calpastatin                                                                                 | 12380  | 1.52  | 2.01  | 2.52  | 0.60 | -0.30 ns |
| Tgm1          | transglutaminase 1, K polypeptide                                                           | 21816  | 0.17  | 0.37  | 0.93  | 0.18 | -0.75 ns |
| Spsb4         | splA/ryanodine receptor domain and SOCS box containing 4                                    | 211949 | 0.56  | 0.62  | 0.68  | 0.81 | -0.07 ns |
| Rogdi         | rogdi homolog (Drosophila)                                                                  | 66049  | 1.49  | 1.25  | 1.24  | 1.19 | -0.20 ns |
| Myo18a        | myosin XVIIIa                                                                               | 360013 | 1.88  | 2.15  | 1.24  | 1.51 | 0.27 ns  |

|               |                                                                                |        |       |       |       |       |           |
|---------------|--------------------------------------------------------------------------------|--------|-------|-------|-------|-------|-----------|
| Egfl7         | EGF-like domain 7                                                              | 353156 | 0.28  | 0.39  | 0.35  | 0.80  | -0.71 ns  |
| Gfod2         | glucose-fructose oxidoreductase domain containing 2                            | 70575  | 0.32  | 0.34  | 0.27  | 1.17  | 0.04 ns   |
| Dsndd2        | dysbindin (dystrobrevin binding protein 1) domain containing 2                 | 52840  | 1.93  | 2.24  | 2.59  | 0.74  | -0.23 ns  |
| Zdhhc20       | zinc finger, DHHC domain containing 20                                         | 75965  | 0.74  | 0.82  | 1.22  | 0.60  | -0.79 ns  |
| BC027231      | cDNA sequence BC027231                                                         | 212547 | 0.38  | 0.42  | 0.42  | 0.90  | -0.54 ns  |
| Ccdc104       | coiled-coil domain containing 104                                              | 216618 | 0.94  | 1.02  | 1.07  | 0.87  | -0.48 ns  |
| 1110005A03Rik | RIKEN cDNA 1110005A03 gene                                                     | 74319  | 0.68  | 0.62  | 0.66  | 1.03  | 0.43 ns   |
| 4933407N01Rik | RIKEN cDNA 4933407N01 gene                                                     | 66753  | 0.80  | 0.80  | 0.96  | 0.83  | -0.32 ns  |
| Sc5d          | sterol-C5-desaturase (fungal ERG3, delta-5-desaturase) homolog (S. cerevisiae) | 235293 | 1.56  | 1.26  | 1.47  | 1.06  | 0.50 ns   |
| Aldoc         | aldolase 3, C isoform                                                          | 11676  | 2.26  | 2.36  | 3.14  | 0.72  | -0.37 ns  |
| Ifnar2        | interferon (alpha and beta) receptor 2                                         | 15976  | 0.85  | 0.99  | 1.20  | 0.70  | -0.98 *** |
| Ubl7          | ubiquitin-like 7 (bone marrow stromal cell-derived)                            | 69459  | 0.97  | 0.78  | 0.86  | 1.12  | 0.61 ns   |
| Gtpbp5        | GTP binding protein 5                                                          | 52856  | 0.30  | 0.30  | 0.38  | 0.79  | -0.50 ns  |
| Eif5a         | eukaryotic translation initiation factor 5A                                    | 276770 | 13.90 | 14.28 | 14.76 | 0.94  | -0.63 ns  |
| Cryz1         | crystallin, zeta (quinone reductase)-like 1                                    | 66609  | 1.73  | 1.68  | 1.79  | 0.96  | -0.24 ns  |
| Parp8         | poly (ADP-ribose) polymerase family, member 8                                  | 52552  | 0.30  | 0.49  | 0.52  | 0.57  | -0.81 *   |
| Plxnd1        | plexin D1                                                                      | 67784  | 0.15  | 0.23  | 0.49  | 0.30  | -0.84 *   |
| Zdhhc8        | zinc finger, DHHC domain containing 8                                          | 27801  | 0.85  | 0.71  | 0.77  | 1.10  | 0.61 ns   |
| E2f4          | E2F transcription factor 4                                                     | 104394 | 0.31  | 0.31  | 0.25  | 1.22  | 0.68 ns   |
| Rabepk        | Rab9 effector protein with kelch motifs                                        | 227746 | 0.46  | 0.36  | 0.30  | 1.54  | 0.46 ns   |
| Lyplal1       | lysophospholipase-like 1                                                       | 226791 | 0.62  | 0.75  | 0.51  | 1.21  | 0.08 ns   |
| Wac           | WW domain containing adaptor with coiled-coil                                  | 225131 | 1.99  | 2.79  | 2.10  | 0.94  | 0.22 ns   |
| Chchd3        | coiled-coil-helix-coiled-coil-helix domain containing 3                        | 66075  | 1.36  | 1.24  | 1.40  | 0.96  | -0.56 ns  |
| Chchd5        | coiled-coil-helix-coiled-coil-helix domain containing 5                        | 66170  | 0.58  | 0.63  | 0.84  | 0.68  | -0.78 ns  |
| Larp2         | La ribonucleoprotein domain family, member 2                                   | 214048 | 0.35  | 0.44  | 0.33  | 1.05  | 0.29 ns   |
| Hibch         | 3-hydroxyisobutyryl-Coenzyme A hydrolase                                       | 227095 | 0.35  | 0.39  | 0.23  | 1.50  | 0.09 ns   |
| Rheb1         | Ras homolog enriched in brain like 1                                           | 69159  | 0.49  | 0.56  | 0.63  | 0.77  | -0.26 ns  |
| Spg20         | spastic paraplegia 20, spartin (Troyer syndrome) homolog (human)               | 229285 | 1.38  | 1.22  | 0.99  | 1.38  | 0.79 ns   |
| Lrch4         | leucine-rich repeats and calponin homology (CH) domain containing 4            | 231798 | 0.63  | 0.51  | 0.45  | 1.40  | 0.21 ns   |
| Mif4gd        | MIF4G domain containing                                                        | 69674  | 0.57  | 0.52  | 0.83  | 0.68  | -0.76 ns  |
| Arhgap12      | Rho GTPase activating protein 12                                               | 75415  | 0.51  | 0.52  | 0.67  | 0.76  | -0.35 ns  |
| Steap1        | six transmembrane epithelial antigen of the prostate 1                         | 70358  | 0.74  | 0.94  | 0.96  | 0.77  | -0.77 ns  |
| Mtfr1         | mitochondrial fission regulator 1                                              | 67472  | 1.28  | 1.48  | 1.32  | 0.97  | -0.54 ns  |
| Bcs1l         | BCS1-like (yeast)                                                              | 66821  | 0.53  | 0.57  | 0.41  | 1.29  | -0.17 ns  |
| Tdrd3         | tudor domain containing 3                                                      | 219249 | 0.85  | 0.79  | 0.90  | 0.94  | 0.21 ns   |
| Ephb3         | Eph receptor B3                                                                | 13845  | 0.50  | 0.42  | 0.65  | 0.76  | -0.51 ns  |
| Nln           | neurolysin (metallopeptidase M3 family)                                        | 75805  | 0.37  | 0.46  | 0.35  | 1.05  | -0.40 ns  |
| Fbxw7         | F-box and WD-40 domain protein 7, archipelago homolog (Drosophila)             | 50754  | 0.76  | 0.71  | 0.49  | 1.54  | 0.67 ns   |
| Dhrs4         | dehydrogenase/reductase (SDR family) member 4                                  | 28200  | 1.02  | 0.85  | 0.84  | 1.20  | 0.17 ns   |
| Parp14        | poly (ADP-ribose) polymerase family, member 14                                 | 547253 | 0.08  | 0.11  | 0.61  | 0.12  | -0.70 ns  |
| Zfp810        | zinc finger protein 810                                                        | 235050 | 0.56  | 0.36  | 0.35  | 1.60  | 0.86 *    |
| Ifi203        | interferon activated gene 203                                                  | 15950  | 0.04  | 0.07  | 0.44  | 0.08  | -0.59 ns  |
| 6720467C03Rik | RIKEN cDNA 6720467C03 gene                                                     | 68099  | 1.15  | 1.29  | 1.37  | 0.84  | -0.53 ns  |
| LOC637796     |                                                                                | 637796 | 0.83  | 0.82  | 0.72  | 1.15  | 0.00 ns   |
| Stxa4a        | syntaxin 4A (placental)                                                        | 20909  | 0.65  | 0.75  | 0.93  | 0.70  | -0.94 **  |
| Bcl9          | B-cell CLL/lymphoma 9                                                          | 77578  | 0.44  | 0.41  | 0.39  | 1.11  | -0.33 ns  |
| Nudt3         | nudix (nucleotide diphosphate linked moiety X)-type motif 3                    | 56409  | 1.48  | 1.06  | 0.95  | 1.54  | 0.86 *    |
| Prkdc         | protein kinase, DNA activated, catalytic polypeptide                           | 19090  | 0.68  | 0.61  | 0.67  | 1.02  | -0.09 ns  |
| BC025076      | cDNA sequence BC025076                                                         | 216829 | 0.73  | 0.63  | 0.67  | 1.09  | 0.14 ns   |
| Tip1l         | TIP41, TOR signalling pathway regulator-like (S. cerevisiae)                   | 226591 | 1.04  | 0.97  | 0.93  | 1.11  | 0.22 ns   |
| Gats          | opposite strand transcription unit to Stag3                                    | 80909  | 0.33  | 0.40  | 0.36  | 0.91  | -0.63 ns  |
| Sphk1         | sphingosine kinase 1                                                           | 20698  | 0.94  | 0.88  | 0.71  | 1.30  | -0.33 ns  |
| Lmbrd1        | LMBR1 domain containing 1                                                      | 68421  | 1.26  | 1.16  | 0.99  | 1.26  | 0.90 *    |
| Pkd1l2        | Polycystic kidney disease 1 like 2                                             | 76645  | 0.73  | 0.62  | 0.67  | 1.09  | -0.37 ns  |
| C730048C13Rik |                                                                                | 319800 | 0.74  | 0.18  | 0.01  | 78.20 | 0.93 **   |
| D630002G06Rik |                                                                                | 236293 | 0.74  | 0.18  | 0.01  | 78.20 | 0.93 **   |
| Armc1         |                                                                                | 74252  | 1.49  | 1.40  | 1.30  | 1.14  | 0.21 ns   |
| LOC634390     |                                                                                | 634390 | 1.49  | 1.40  | 1.30  | 1.14  | 0.21 ns   |
| Dbr1          | debranching enzyme homolog 1 (S. cerevisiae)                                   | 83703  | 0.56  | 0.76  | 0.59  | 0.94  | 0.41 ns   |
| Rab4b         | RAB4B, member RAS oncogene family                                              | 19342  | 0.36  | 0.36  | 0.55  | 0.65  | -0.89 *   |
| Wdr75         | WD repeat domain 75                                                            | 73674  | 0.67  | 0.77  | 0.78  | 0.85  | -0.52 ns  |
| Hoxb6         | homeo box B6                                                                   | 15414  | 1.12  | 0.90  | 0.99  | 1.12  | -0.01 ns  |
| Trim3         | tripartite motif protein 3                                                     | 55992  | 0.66  | 0.48  | 0.44  | 1.47  | 0.13 ns   |
| Ap4s1         | adaptor-related protein complex AP-4, sigma 1                                  | 11782  | 0.71  | 0.76  | 0.77  | 0.92  | -0.39 ns  |
| Acly          | ATP citrate lyase                                                              | 104112 | 4.76  | 4.42  | 5.39  | 0.88  | -0.09 ns  |
| C530043G21Rik | RIKEN cDNA C530043G21 gene                                                     | 215015 | 1.99  | 2.19  | 2.15  | 0.92  | -0.57 ns  |
| Ppm1b         | protein phosphatase 1B, magnesium dependent, beta isoform                      | 19043  | 2.21  | 2.06  | 1.87  | 1.18  | 0.85 *    |
| Drap1         | Dr1 associated protein 1 (negative cofactor 2 alpha)                           | 66556  | 2.81  | 2.67  | 2.04  | 1.37  | 0.94 **   |
| Narf          | nuclear prelamin A recognition factor                                          | 67608  | 1.09  | 0.92  | 0.59  | 1.85  | 0.77 ns   |
| Tmco6         | transmembrane and coiled-coil domains 6                                        | 71983  | 0.48  | 0.46  | 0.38  | 1.24  | 0.63 ns   |
| Gpx4          | glutathione peroxidase 4                                                       | 625249 | 6.81  | 6.44  | 5.71  | 1.19  | 0.19 ns   |
| 1110007L15Rik | RIKEN cDNA 1110007L15 gene                                                     | 67604  | 1.56  | 1.52  | 1.69  | 0.92  | -0.36 ns  |
| Aprt          | adenine phosphoribosyl transferase                                             | 11821  | 2.95  | 3.39  | 2.44  | 1.20  | 0.41 ns   |
| Map2k3        | mitogen activated protein kinase kinase 3                                      | 26397  | 1.52  | 1.44  | 1.40  | 1.08  | -0.20 ns  |
| Vps39         | vacuolar protein sorting 39 (yeast)                                            | 269338 | 0.48  | 0.42  | 0.36  | 1.32  | 0.63 ns   |
| Smyd5         | SET and MYND domain containing 5                                               | 232187 | 0.41  | 0.45  | 0.37  | 1.11  | 0.41 ns   |
| Slu7          | SLU7 splicing factor homolog (S. cerevisiae)                                   | 193116 | 1.02  | 1.09  | 1.36  | 0.75  | -0.76 ns  |
| Wdr13         | WD repeat domain 13                                                            | 73447  | 0.34  | 0.46  | 0.63  | 0.54  | -0.65 ns  |
| Zfp62         | zinc finger protein 62                                                         | 22720  | 0.30  | 0.41  | 0.36  | 0.83  | -0.13 ns  |
| Abca3         | ATP-binding cassette, sub-family A (ABC1), member 3                            | 27410  | 1.12  | 1.33  | 0.78  | 1.42  | 0.57 ns   |
| Map2k7        | mitogen activated protein kinase kinase 7                                      | 26400  | 1.89  | 2.32  | 2.69  | 0.70  | -0.91 *   |
| Paip1         | polyadenylate binding protein-interacting protein 1                            | 218693 | 1.12  | 1.52  | 1.75  | 0.64  | -0.67 ns  |
| Cdk7          | cyclin-dependent kinase 7 (homolog of Xenopus MO15 cdk-activating kinase)      | 12572  | 0.54  | 0.66  | 0.78  | 0.69  | -0.97 **  |
| Ugp2          | UDP-glucose pyrophosphorylase 2                                                | 216558 | 1.86  | 1.58  | 1.94  | 0.95  | 0.17 ns   |



|               |                                                                                                |        |      |      |      |      |          |
|---------------|------------------------------------------------------------------------------------------------|--------|------|------|------|------|----------|
| Znhit1        | zinc finger, HIT domain containing 1                                                           | 70103  | 3.19 | 3.11 | 2.92 | 1.09 | 0.44 ns  |
| Atg12         | autophagy-related 12 (yeast)                                                                   | 67526  | 0.59 | 0.51 | 0.49 | 1.21 | 0.64 ns  |
| Setd3         | SET domain containing 3                                                                        | 52690  | 1.45 | 1.41 | 1.62 | 0.89 | -0.55 ns |
| Dhx9          | DEAH (Asp-Glu-Ala-His) box polypeptide 9                                                       | 13211  | 3.29 | 3.65 | 3.24 | 1.01 | 0.01 ns  |
| Blnk          | B-cell linker                                                                                  | 17060  | 2.74 | 3.19 | 1.89 | 1.44 | 0.62 ns  |
| Kifap3        | kinesin-associated protein 3                                                                   | 16579  | 1.17 | 1.16 | 0.94 | 1.24 | 0.51 ns  |
| Muc20         | mucin 20                                                                                       | 224116 | 0.40 | 1.03 | 0.37 | 1.08 | 0.21 ns  |
| Ryk           | receptor-like tyrosine kinase                                                                  | 20187  | 1.17 | 1.17 | 1.06 | 1.10 | 0.53 ns  |
| Il1rn         | interleukin 1 receptor antagonist                                                              | 16181  | 0.08 | 0.14 | 0.44 | 0.19 | -0.54 ns |
| Vegfb         | vascular endothelial growth factor B                                                           | 22340  | 1.17 | 1.10 | 0.85 | 1.37 | 0.84 *   |
| Htatip2       | HIV-1 tat interactive protein 2, homolog (human)                                               | 53415  | 0.37 | 0.57 | 0.47 | 0.80 | 0.01 ns  |
| Scrn2         | secernin 2                                                                                     | 217140 | 0.36 | 0.37 | 0.35 | 1.00 | -0.12 ns |
| Copz1         | coatamer protein complex, subunit zeta 1                                                       | 56447  | 1.98 | 1.83 | 2.03 | 0.97 | 0.24 ns  |
| Nox4          | NADPH oxidase 4                                                                                | 50490  | 0.63 | 0.41 | 0.37 | 1.68 | 0.72 ns  |
| Setdb1        | SET domain, bifurcated 1                                                                       | 84505  | 0.91 | 0.80 | 0.80 | 1.13 | -0.14 ns |
| Pthr2         | peptidyl-tRNA hydrolase 2                                                                      | 217057 | 1.60 | 1.46 | 1.17 | 1.36 | 0.45 ns  |
| Lsm2          | LSM2 homolog, U6 small nuclear RNA associated (S. cerevisiae)                                  | 27756  | 1.61 | 1.13 | 1.13 | 1.42 | 0.71 ns  |
| Dhcr24        | 24-dehydrocholesterol reductase                                                                | 74754  | 0.97 | 0.89 | 0.85 | 1.14 | 0.53 ns  |
| Gtf2ird1      | general transcription factor II I repeat domain-containing 1                                   | 57080  | 1.00 | 0.93 | 1.00 | 1.00 | 0.10 ns  |
| Zfp758        | zinc finger protein 758                                                                        | 224598 | 0.40 | 0.38 | 0.24 | 1.67 | 0.80 ns  |
| Edn1          | endothelin 1                                                                                   | 13614  | 0.24 | 0.38 | 0.38 | 0.62 | -0.71 ns |
| Adamtsl4      | ADAMTS-like 4                                                                                  | 229595 | 0.36 | 0.37 | 0.45 | 0.78 | -0.08 ns |
| Xrcc5         | X-ray repair complementing defective repair in Chinese hamster cells 5                         | 22596  | 0.42 | 0.43 | 0.22 | 1.87 | 0.40 ns  |
| Parp3         | poly (ADP-ribose) polymerase family, member 3                                                  | 235587 | 0.28 | 0.25 | 0.34 | 0.81 | -0.74 ns |
| Cul4a         | cullin 4A                                                                                      | 99375  | 0.70 | 0.59 | 0.97 | 0.72 | -0.69 ns |
| Ospb2         | oxysterol binding protein-like 2                                                               | 228983 | 0.90 | 0.91 | 0.96 | 0.94 | -0.54 ns |
| Kras          | v-Ki-ras2 Kirsten rat sarcoma viral oncogene homolog                                           | 16653  | 1.88 | 1.97 | 2.19 | 0.85 | -0.70 ns |
| Casd1         | CAS1 domain containing 1                                                                       | 213819 | 0.89 | 0.92 | 0.93 | 0.96 | -0.57 ns |
| Gtrgeo22      | gene trap ROSA b-geo 22                                                                        | 110012 | 0.53 | 0.43 | 0.43 | 1.23 | 0.79 ns  |
| Map2k4        | mitogen activated protein kinase kinase 4                                                      | 26398  | 0.71 | 0.62 | 0.70 | 1.01 | -0.34 ns |
| Lrrk1         | leucine-rich repeat kinase 1                                                                   | 233328 | 1.16 | 0.87 | 0.90 | 1.28 | 0.57 ns  |
| Chmp4b        | chromatin modifying protein 4B                                                                 | 75608  | 7.10 | 7.13 | 8.26 | 0.86 | -0.83 *  |
| Adrbk1        | adrenergic receptor kinase, beta 1                                                             | 110355 | 1.00 | 0.92 | 1.01 | 0.99 | 0.35 ns  |
| 9130404D08Rik | RIKEN cDNA 9130404D08 gene                                                                     | 74549  | 0.41 | 0.53 | 0.49 | 0.83 | -0.59 ns |
| 3930401K13Rik | RIKEN cDNA 3930401K13 gene                                                                     | 74022  | 2.99 | 2.34 | 2.87 | 1.03 | -0.10 ns |
| Taf11         | TAF11 RNA polymerase II, TATA box binding protein (TBP)-associated factor                      | 68776  | 0.38 | 0.39 | 0.27 | 1.42 | 0.91 *   |
| Zfp426        | zinc finger protein 426                                                                        | 235028 | 0.48 | 0.39 | 0.31 | 1.56 | 0.94 **  |
| Uxs1          | UDP-glucuronate decarboxylase 1                                                                | 67883  | 0.59 | 0.65 | 0.60 | 0.97 | -0.20 ns |
| Exosc1        | exosome component 1                                                                            | 66583  | 1.29 | 1.39 | 1.06 | 1.21 | 0.73 ns  |
| Siva1         | SIVA1, apoptosis-inducing factor                                                               | 30954  | 4.09 | 4.33 | 4.20 | 0.97 | -0.18 ns |
| Ldb1          | LIM domain binding 1                                                                           | 16825  | 1.22 | 1.12 | 0.94 | 1.30 | 0.79 ns  |
| Pla2g12a      | phospholipase A2, group XIIA                                                                   | 66350  | 0.40 | 0.50 | 0.54 | 0.74 | -0.66 ns |
| Prkar1a       | protein kinase, cAMP dependent regulatory, type I, alpha                                       | 19084  | 4.76 | 4.68 | 4.69 | 1.01 | 0.52 ns  |
| Col4a1        | procollagen, type IV, alpha 1                                                                  | 12826  | 2.21 | 2.07 | 0.87 | 2.52 | 0.59 ns  |
| Tmpo          | thymopoietin                                                                                   | 21917  | 6.68 | 6.46 | 5.68 | 1.17 | 0.42 ns  |
| Mgat2         | mannoside acetylglucosaminyltransferase 2                                                      | 217664 | 1.45 | 1.45 | 1.49 | 0.97 | -0.53 ns |
| Bap1          | Brca1 associated protein 1                                                                     | 104416 | 1.43 | 1.49 | 1.54 | 0.92 | -0.19 ns |
| Cdca3         | cell division cycle associated 3                                                               | 14793  | 1.81 | 1.74 | 2.47 | 0.73 | -0.26 ns |
| Klhl26        | kelch-like 26 (Drosophila)                                                                     | 234378 | 0.86 | 0.76 | 0.91 | 0.94 | 0.19 ns  |
| 2310011J03Rik | RIKEN cDNA 2310011J03 gene                                                                     | 66374  | 0.82 | 0.66 | 0.63 | 1.29 | 0.44 ns  |
| Arpc5l        | actin related protein 2/3 complex, subunit 5-like                                              | 74192  | 2.28 | 2.28 | 1.97 | 1.15 | 0.16 ns  |
| Zfp281        | zinc finger protein 281                                                                        | 226442 | 0.97 | 0.88 | 0.77 | 1.24 | 0.58 ns  |
| Cacybp        | calycylin binding protein                                                                      | 12301  | 1.83 | 1.88 | 1.61 | 1.13 | -0.26 ns |
| Mrp12         | mitochondrial ribosomal protein L12                                                            | 56282  | 2.52 | 2.44 | 2.69 | 0.93 | -0.20 ns |
| Rpl7l1        | ribosomal protein L7-like 1                                                                    | 66229  | 1.89 | 1.61 | 1.04 | 1.81 | 0.99 *** |
| Ctdsp1        | CTD (carboxy-terminal domain, RNA polymerase II, polypeptide A) small phosphatase 1            | 227292 | 1.59 | 1.79 | 1.12 | 1.42 | 0.50 ns  |
| Rnf11         | ring finger protein 11                                                                         | 29864  | 2.00 | 1.91 | 2.06 | 0.97 | -0.35 ns |
| Slc35f5       | solute carrier family 35, member F5                                                            | 74150  | 0.71 | 0.76 | 1.03 | 0.69 | -0.88 *  |
| Limk2         | LIM motif-containing protein kinase 2                                                          | 16886  | 0.60 | 0.81 | 0.71 | 0.84 | -0.53 ns |
| Strbp         | spermatid perinuclear RNA binding protein                                                      | 20744  | 1.92 | 1.42 | 1.34 | 1.43 | 0.58 ns  |
| Prpsap2       | phosphoribosyl pyrophosphate synthetase-associated protein 2                                   | 212627 | 0.74 | 0.62 | 0.58 | 1.28 | 0.75 ns  |
| Ndfip2        | Nedd4 family interacting protein 2                                                             | 76273  | 1.58 | 1.45 | 1.97 | 0.80 | -0.52 ns |
| Thap7         | THAP domain containing 7                                                                       | 69009  | 1.03 | 1.13 | 1.10 | 0.94 | -0.11 ns |
| 6720460F02Rik | RIKEN cDNA 6720460F02 gene                                                                     | 109212 | 0.60 | 0.66 | 0.69 | 0.87 | 0.29 ns  |
| Spryd4        | SPRY domain containing 4                                                                       | 66701  | 0.46 | 0.39 | 0.37 | 1.23 | 0.54 ns  |
| Zcchc17       | zinc finger, CCHC domain containing 17                                                         | 619605 | 0.49 | 0.59 | 0.50 | 0.98 | 0.36 ns  |
| Gatad1        | GATA zinc finger domain containing 1                                                           | 67210  | 1.17 | 0.97 | 1.09 | 1.07 | 0.13 ns  |
| Trmt5         | TRM5 tRNA methyltransferase 5 homolog (S. cerevisiae)                                          | 76357  | 0.36 | 0.46 | 0.41 | 0.87 | -0.18 ns |
| Rbm28         | RNA binding motif protein 28                                                                   | 68272  | 1.07 | 1.15 | 1.02 | 1.04 | 0.55 ns  |
| Tmem185b      | transmembrane protein 185B                                                                     | 226351 | 0.92 | 1.01 | 0.83 | 1.10 | 0.33 ns  |
| P4ha1         | procollagen-proline, 2-oxoglutarate 4-dioxygenase (proline 4-hydroxylase), alpha 1 polypeptide | 18451  | 1.66 | 1.87 | 1.88 | 0.88 | 0.20 ns  |
| D230025D16Rik | RIKEN cDNA D230025D16 gene                                                                     | 234678 | 0.60 | 0.66 | 0.56 | 1.07 | 0.57 ns  |
| Chtf18        | CTF18, chromosome transmission fidelity factor 18 homolog (S. cerevisiae)                      | 214901 | 0.47 | 0.49 | 0.25 | 1.84 | 0.81 ns  |
| AA408296      | expressed sequence AA408296                                                                    | 215193 | 0.33 | 0.36 | 0.31 | 1.06 | 0.00 ns  |
| Dullard       | Dullard homolog (Xenopus laevis)                                                               | 67181  | 1.60 | 1.62 | 1.90 | 0.84 | -0.47 ns |
| Tsc2          | tuberous sclerosis 2                                                                           | 22084  | 0.99 | 0.75 | 0.53 | 1.87 | 0.95 **  |
| Npnt          | nephronectin                                                                                   | 114249 | 7.80 | 8.32 | 2.92 | 2.66 | 0.39 ns  |
| Mtrr          | 5-methyltetrahydrofolate-homocysteine methyltransferase reductase                              | 210009 | 0.21 | 0.31 | 0.37 | 0.58 | -0.28 ns |
| Mrps35        | mitochondrial ribosomal protein S35                                                            | 232536 | 0.77 | 0.80 | 0.72 | 1.07 | 0.62 ns  |
| Rab23         | RAB23, member RAS oncogene family                                                              | 19335  | 0.31 | 0.38 | 0.37 | 0.82 | -0.57 ns |
| Nat11         | N-acetyltransferase 11                                                                         | 70999  | 1.73 | 1.48 | 1.39 | 1.24 | 0.94 **  |
| AI314180      | expressed sequence AI314180                                                                    | 230249 | 0.80 | 0.76 | 0.86 | 0.93 | -0.66 ns |
| Ank3          | ankyrin 3, epithelial                                                                          | 11735  | 1.92 | 1.33 | 1.75 | 1.09 | -0.31 ns |
| Zfp160        | zinc finger protein 160                                                                        | 224585 | 0.61 | 0.47 | 0.43 | 1.42 | 0.81 ns  |

|               |                                                                                                                                       |        |       |       |      |      |          |
|---------------|---------------------------------------------------------------------------------------------------------------------------------------|--------|-------|-------|------|------|----------|
| Ptpn13        | protein tyrosine phosphatase, non-receptor type 13                                                                                    | 19249  | 1.74  | 1.91  | 1.91 | 0.91 | -0.10 ns |
| Brc3          | BRCA1/BRCA2-containing complex, subunit 3                                                                                             | 210766 | 0.63  | 0.52  | 0.91 | 0.68 | -0.43 ns |
| Tlcd1         | TLC domain containing 1                                                                                                               | 68385  | 0.91  | 0.80  | 0.48 | 1.88 | 0.09 ns  |
| Slc35c1       | solute carrier family 35, member C1                                                                                                   | 228368 | 0.29  | 0.29  | 0.30 | 0.96 | -0.05 ns |
| Spnb2         | spectrin beta 2                                                                                                                       | 20742  | 7.66  | 6.44  | 7.27 | 1.05 | 0.36 ns  |
| Mrp144        | mitochondrial ribosomal protein L44                                                                                                   | 69163  | 1.37  | 1.17  | 0.80 | 1.71 | 0.78 ns  |
| H6pd          | hexose-6-phosphate dehydrogenase (glucose 1-dehydrogenase)                                                                            | 100198 | 0.95  | 1.09  | 1.31 | 0.72 | -0.90 *  |
| Sec24c        | SEC24 related gene family, member C (S. cerevisiae)                                                                                   | 218811 | 2.13  | 2.30  | 2.08 | 1.02 | 0.49 ns  |
| Ube3b         | ubiquitin protein ligase E3B                                                                                                          | 117146 | 0.88  | 0.85  | 0.84 | 1.04 | 0.74 ns  |
| AU040320      | expressed sequence AU040320                                                                                                           | 100317 | 0.82  | 0.86  | 0.89 | 0.91 | -0.30 ns |
| Clint1        | clathrin interactor 1                                                                                                                 | 216705 | 2.61  | 2.63  | 3.18 | 0.82 | -0.81 ns |
| Fbxo18        | F-box protein 18                                                                                                                      | 50755  | 0.88  | 0.82  | 0.61 | 1.45 | 0.85 *   |
| Nisch         | nischarin                                                                                                                             | 64652  | 5.26  | 4.13  | 3.58 | 1.46 | 0.82 *   |
| Eprs          |                                                                                                                                       | 107508 | 2.26  | 2.39  | 1.85 | 1.21 | 0.52 ns  |
| LOC633677     |                                                                                                                                       | 633677 | 2.26  | 2.39  | 1.85 | 1.21 | 0.52 ns  |
| 2310001A20Rik | RIKEN cDNA 2310001A20 gene                                                                                                            | 71881  | 0.80  | 0.96  | 0.90 | 0.88 | 0.05 ns  |
| Ets1          | E26 avian leukemia oncogene 1, 5' domain                                                                                              | 23871  | 1.63  | 1.41  | 1.03 | 1.57 | 0.99 *** |
| 2810407C02Rik | RIKEN cDNA 2810407C02 gene                                                                                                            | 69227  | 6.79  | 6.17  | 5.60 | 1.21 | 0.53 ns  |
| Gspt1         | G1 to S phase transition 1                                                                                                            | 14852  | 2.84  | 2.96  | 3.61 | 0.78 | -0.83 *  |
| Dgkz          | diacylglycerol kinase zeta                                                                                                            | 104418 | 1.50  | 1.25  | 1.41 | 1.06 | 0.25 ns  |
| Grwd1         | glutamate-rich WD repeat containing 1                                                                                                 | 101612 | 0.58  | 0.74  | 0.61 | 0.95 | -0.16 ns |
| Hadha         | hydroxyacyl-Coenzyme A dehydrogenase/3-ketoacyl-Coenzyme A thiolase/enoyl-Coenzyme A hydratase (trifunctional protein), alpha subunit | 97212  | 1.93  | 1.75  | 1.67 | 1.15 | 0.50 ns  |
| Sreb2         | sterol regulatory element binding factor 2                                                                                            | 20788  | 1.73  | 1.49  | 2.46 | 0.70 | -0.57 ns |
| Nup153        | nucleoporin 153                                                                                                                       | 218210 | 2.96  | 2.89  | 2.98 | 0.99 | 0.42 ns  |
| LOC671535     |                                                                                                                                       | 671535 | 0.33  | 0.44  | 0.73 | 0.45 | -0.75 ns |
| Galnt2        | UDP-N-acetyl-alpha-D-galactosamine:polypeptide N-acetylgalactosaminyltransferase 2                                                    | 108148 | 2.16  | 2.38  | 1.22 | 1.76 | 0.57 ns  |
| Ndufb9        | NADH dehydrogenase (ubiquinone) 1 beta subcomplex, 9                                                                                  | 66218  | 6.71  | 6.20  | 6.53 | 1.02 | 0.17 ns  |
| Rbm5          | RNA binding motif protein 5                                                                                                           | 83486  | 2.83  | 2.59  | 2.26 | 1.25 | 0.97 **  |
| Wdr82         | WD repeat domain containing 82                                                                                                        | 77305  | 1.00  | 1.06  | 1.07 | 0.93 | 0.16 ns  |
| Wasl          | Wiskott-Aldrich syndrome-like (human)                                                                                                 | 73178  | 4.81  | 6.07  | 4.43 | 1.08 | 0.12 ns  |
| Tbcd          | tubulin-specific chaperone d                                                                                                          | 108903 | 1.28  | 1.20  | 1.20 | 1.06 | 0.46 ns  |
| Nckap1        | NCK-associated protein 1                                                                                                              | 50884  | 6.02  | 5.43  | 4.70 | 1.28 | 0.60 ns  |
| Smc4          | structural maintenance of chromosomes 4                                                                                               | 70099  | 10.07 | 9.51  | 8.24 | 1.22 | 0.87 *   |
| Obfc2a        | oligonucleotide/oligosaccharide-binding fold containing 2A                                                                            | 109019 | 0.49  | 0.51  | 0.47 | 1.04 | -0.42 ns |
| Anks1         | ankyrin repeat and SAM domain containing 1                                                                                            | 224650 | 0.33  | 0.39  | 0.32 | 1.03 | -0.04 ns |
| Sucla2        | succinate-Coenzyme A ligase, ADP-forming, beta subunit                                                                                | 20916  | 2.50  | 2.29  | 3.13 | 0.79 | -0.45 ns |
| Cited2        |                                                                                                                                       | 17684  | 4.49  | 4.02  | 4.20 | 1.06 | -0.27 ns |
| Prdm4         | PR domain containing 4                                                                                                                | 72843  | 0.85  | 0.66  | 0.57 | 1.48 | 0.85 *   |
| Pkp4          | plakophilin 4                                                                                                                         | 227937 | 2.11  | 2.18  | 1.71 | 1.23 | -0.17 ns |
| Tex2          | testis expressed gene 2                                                                                                               | 21763  | 0.49  | 0.50  | 0.82 | 0.60 | -0.31 ns |
| Skil          | SKI-like                                                                                                                              | 20482  | 3.59  | 3.81  | 2.57 | 1.39 | 0.79 ns  |
| 9130401M01Rik | RIKEN cDNA 9130401M01 gene                                                                                                            | 75758  | 0.69  | 0.83  | 1.06 | 0.65 | -0.45 ns |
| Mcat          | malonyl CoA:ACP acyltransferase (mitochondrial)                                                                                       | 223722 | 0.38  | 0.39  | 0.51 | 0.74 | -0.76 ns |
| Ahnak         | AHNAK nucleoprotein (desmoyokin)                                                                                                      | 66395  | 10.07 | 10.56 | 6.61 | 1.52 | 0.66 ns  |
| Tmem63b       | transmembrane protein 63b                                                                                                             | 224807 | 0.56  | 0.53  | 0.38 | 1.46 | 0.33 ns  |
| Dock1         | dedicator of cyto-kinesis 1                                                                                                           | 330662 | 0.86  | 0.88  | 0.61 | 1.40 | 0.11 ns  |
| Cxxc1         | CXXC finger 1 (PHD domain)                                                                                                            | 74322  | 0.62  | 0.64  | 0.67 | 0.92 | -0.05 ns |
| Utrn          | utrophin                                                                                                                              | 22288  | 2.24  | 1.70  | 1.98 | 1.13 | -0.03 ns |
| Gcap14        | granule cell antiserum positive 14                                                                                                    | 72972  | 0.54  | 0.50  | 0.47 | 1.14 | -0.21 ns |
| 2010106G01Rik | RIKEN cDNA 2010106G01 gene                                                                                                            | 66552  | 1.84  | 1.56  | 2.04 | 0.90 | -0.36 ns |
| Galnt7        | UDP-N-acetyl-alpha-D-galactosamine: polypeptide N-acetylgalactosaminyltransferase 7                                                   | 108150 | 0.23  | 0.36  | 0.28 | 0.81 | 0.07 ns  |
| Abcc1         | ATP-binding cassette, sub-family C (CFTR/MRP), member 1                                                                               | 17250  | 3.89  | 3.83  | 5.07 | 0.76 | -0.79 ns |
| Man1b1        | mannosidase, alpha, class 1B, member 1                                                                                                | 227619 | 0.41  | 0.50  | 0.34 | 1.21 | 0.50 ns  |
| Topbp1        | topoisomerase (DNA) II beta binding protein                                                                                           | 235559 | 3.10  | 2.93  | 3.12 | 0.99 | 0.49 ns  |
| Cep55         | centrosomal protein 55                                                                                                                | 74107  | 2.57  | 2.78  | 2.73 | 0.94 | 0.47 ns  |
| Ostf1         | osteoclast stimulating factor 1                                                                                                       | 20409  | 1.67  | 1.68  | 1.52 | 1.09 | 0.17 ns  |
| Pleckhg5      | pleckstrin homology domain containing, family G (with RhoGef domain) member 5                                                         | 269608 | 0.35  | 0.44  | 0.32 | 1.09 | 0.35 ns  |
| Nbea          | neurobeachin                                                                                                                          | 26422  | 1.75  | 1.09  | 0.56 | 3.08 | 0.65 ns  |
| Utp20         | UTP20, small subunit (SSU) processome component, homolog (yeast)                                                                      | 70683  | 0.99  | 1.00  | 0.71 | 1.39 | 0.49 ns  |
| Fbxo38        | F-box protein 38                                                                                                                      | 107035 | 0.54  | 0.57  | 0.59 | 0.90 | 0.07 ns  |
| 1110002N22Rik | RIKEN cDNA 1110002N22 gene                                                                                                            | 68550  | 0.35  | 0.38  | 0.32 | 1.09 | 0.08 ns  |
| Shprh         | SNF2 histone linker PHD RING helicase                                                                                                 | 268281 | 0.39  | 0.35  | 0.41 | 0.95 | -0.52 ns |
| Grpel2        | GrpE-like 2, mitochondrial                                                                                                            | 17714  | 0.63  | 0.71  | 0.88 | 0.71 | -0.47 ns |
| Tenc1         | tensin like C1 domain-containing phosphatase                                                                                          | 209039 | 0.46  | 0.36  | 0.23 | 2.03 | 0.84 *   |
| Clasp1        | CLIP associating protein 1                                                                                                            | 76707  | 1.82  | 1.72  | 1.32 | 1.37 | 0.44 ns  |
| Las1l         | LAS1-like (S. cerevisiae)                                                                                                             | 76130  | 0.47  | 0.53  | 0.57 | 0.82 | -0.10 ns |
| Spnb3         | spectrin beta 3                                                                                                                       | 20743  | 1.84  | 1.45  | 0.83 | 2.21 | 0.07 ns  |
| Gfer          | growth factor, erv1 (S. cerevisiae)-like (augmenter of liver regeneration)                                                            | 11692  | 1.08  | 1.25  | 0.94 | 1.14 | 0.60 ns  |
| AA409316      | expressed sequence AA409316                                                                                                           | 105732 | 1.30  | 1.40  | 1.62 | 0.80 | -0.78 ns |
| Smardc1       | SWI/SNF-related, matrix-associated actin-dependent regulator of chromatin, subfamily a, containing DEAD/H box 1                       | 13990  | 1.16  | 1.00  | 1.24 | 0.93 | -0.56 ns |
| Farp1         | FERM, RhoGEF (Arhgef) and pleckstrin domain protein 1 (chondrocyte-derived)                                                           | 223254 | 0.81  | 0.74  | 0.95 | 0.85 | -0.20 ns |
| Sos2          | Son of sevenless homolog 2 (Drosophila)                                                                                               | 20663  | 0.97  | 1.05  | 1.34 | 0.72 | -0.97 ** |
| Rassf8        | Ras association (RalGDS/AF-6) domain family 8                                                                                         | 71323  | 0.69  | 0.69  | 0.92 | 0.75 | -0.40 ns |
| Slain2        | SLAIN motif family, member 2                                                                                                          | 75991  | 0.93  | 0.77  | 0.92 | 1.01 | 0.10 ns  |
| Ap2b1         | adaptor-related protein complex 2, beta 1 subunit                                                                                     | 71770  | 2.58  | 2.39  | 2.91 | 0.88 | -0.44 ns |
| Pcdh1         | protocadherin 1                                                                                                                       | 75599  | 0.22  | 0.33  | 0.35 | 0.62 | -0.27 ns |
| Myo5b         | myosin Vb                                                                                                                             | 17919  | 0.32  | 0.52  | 0.59 | 0.53 | -0.57 ns |
| Wwp1          | WW domain containing E3 ubiquitin protein ligase 1                                                                                    | 107568 | 0.59  | 0.55  | 0.49 | 1.19 | 0.08 ns  |
| Aldh3b1       | aldehyde dehydrogenase 3 family, member B1                                                                                            | 67689  | 0.37  | 0.23  | 0.23 | 1.64 | 0.19 ns  |
| Arhgef10      | Rho guanine nucleotide exchange factor (GEF) 10                                                                                       | 234094 | 0.34  | 0.38  | 0.22 | 1.55 | 0.64 ns  |

|               |                                                                                                              |        |       |       |      |      |          |
|---------------|--------------------------------------------------------------------------------------------------------------|--------|-------|-------|------|------|----------|
| Arhgef5       | Rho guanine nucleotide exchange factor (GEF) 5                                                               | 54324  | 2.12  | 2.11  | 2.06 | 1.03 | 0.40 ns  |
| Zfyve26       | zinc finger, FYVE domain containing 26                                                                       | 211978 | 0.70  | 0.62  | 0.85 | 0.82 | -0.55 ns |
| Cables2       | Cdk5 and Abl enzyme substrate 2                                                                              | 252966 | 0.38  | 0.39  | 0.57 | 0.67 | -0.72 ns |
| Cgnl1         |                                                                                                              | 68178  | 1.95  | 1.69  | 1.65 | 1.17 | 0.70 ns  |
| LOC677485     |                                                                                                              | 677485 | 1.95  | 1.69  | 1.65 | 1.17 | 0.70 ns  |
| Tada2l        | transcriptional adaptor 2 (ADA2 homolog, yeast)-like                                                         | 217031 | 0.67  | 0.71  | 0.75 | 0.88 | -0.58 ns |
| 5930416119Rik | RIKEN cDNA 5930416119 gene                                                                                   | 72440  | 0.89  | 1.05  | 1.20 | 0.73 | -0.31 ns |
| Hoxb9         | homeo box B9                                                                                                 | 15417  | 2.10  | 1.65  | 1.43 | 1.46 | 0.86 *   |
| Hspa1b        | heat shock protein 1B                                                                                        | 15511  | 9.41  | 10.34 | 9.68 | 0.97 | -0.44 ns |
| Brwd1         | bromodomain and WD repeat domain containing 1                                                                | 93871  | 0.87  | 1.08  | 0.88 | 0.99 | 0.05 ns  |
| Iqsec1        | IQ motif and Sec7 domain 1                                                                                   | 232227 | 0.98  | 1.10  | 0.71 | 1.38 | 0.67 ns  |
| Qser1         | glutamine and serine rich 1                                                                                  | 99003  | 0.94  | 0.62  | 0.52 | 1.77 | 0.86 *   |
| Echs1         | enoyl Coenzyme A hydratase, short chain, 1, mitochondrial                                                    | 93747  | 1.14  | 1.16  | 1.28 | 0.88 | -0.49 ns |
| B3gnt1        | UDP-GlcNAc:betaGal beta-1,3-N-acetylglucosaminyltransferase 1                                                | 108902 | 0.98  | 0.90  | 0.60 | 1.64 | 0.83 *   |
| Parp4         |                                                                                                              | 328417 | 0.47  | 0.41  | 0.41 | 1.14 | 0.84 *   |
| Sept5         |                                                                                                              | 18951  | 0.47  | 0.92  | 0.94 | 0.50 | -0.87 *  |
| Gp1bb         |                                                                                                              | 14724  | 0.47  | 0.92  | 0.94 | 0.50 | -0.87 *  |
| Trim16        | tripartite motif protein 16                                                                                  | 94092  | 0.33  | 0.37  | 0.37 | 0.89 | -0.03 ns |
| Coro2a        | coronin, actin binding protein 2A                                                                            | 107684 | 0.57  | 0.71  | 0.74 | 0.76 | -0.65 ns |
| Sfrs11        | splicing factor, arginine/serine-rich 11                                                                     | 69207  | 5.55  | 5.36  | 4.62 | 1.20 | 0.16 ns  |
| 1700081L11Rik | RIKEN cDNA 1700081L11 gene                                                                                   | 76719  | 1.40  | 1.19  | 0.94 | 1.49 | 0.77 ns  |
| Zfp322a       | zinc finger protein 322a                                                                                     | 218100 | 0.39  | 0.33  | 0.44 | 0.90 | -0.65 ns |
| Creb3l2       | cAMP responsive element binding protein 3-like 2                                                             | 208647 | 1.16  | 0.88  | 0.62 | 1.87 | 0.78 ns  |
| Usp53         | ubiquitin specific peptidase 53                                                                              | 99526  | 0.33  | 0.38  | 0.80 | 0.41 | -0.90 *  |
| Amotl2        | angiomin like 2                                                                                              | 56332  | 1.71  | 1.75  | 1.42 | 1.20 | 0.16 ns  |
| Cars          | cysteinyl-tRNA synthetase                                                                                    | 27267  | 0.65  | 0.68  | 0.80 | 0.82 | -0.63 ns |
| Med19         | mediator of RNA polymerase II transcription, subunit 19 homolog (yeast)                                      | 381379 | 1.13  | 0.92  | 0.89 | 1.26 | 0.68 ns  |
| Wtap          | Wilms' tumour 1-associating protein                                                                          | 60532  | 4.49  | 4.17  | 2.81 | 1.59 | 0.93 **  |
| Phactr2       | phosphatase and actin regulator 2                                                                            | 215789 | 0.46  | 0.28  | 0.24 | 1.93 | 0.07 ns  |
| Erdr1         | erythroid differentiation regulator 1                                                                        | 170942 | 2.29  | 2.45  | 3.63 | 0.63 | -0.18 ns |
| Lrrc1         | leucine rich repeat containing 1                                                                             | 214345 | 0.51  | 0.48  | 0.35 | 1.44 | 0.21 ns  |
| Ccdc86        | coiled-coil domain containing 86                                                                             | 108673 | 0.58  | 0.77  | 0.41 | 1.41 | 0.41 ns  |
| Zfp236        | Zinc finger protein 236                                                                                      | 329002 | 0.85  | 0.79  | 0.75 | 1.13 | -0.30 ns |
| Dgcr6         | DiGeorge syndrome critical region gene 6                                                                     | 13353  | 0.55  | 0.73  | 0.75 | 0.73 | -0.38 ns |
| Taf4a         | TAF4A RNA polymerase II, TATA box binding protein (TBP)-associated factor                                    | 228980 | 0.60  | 0.61  | 0.89 | 0.67 | -0.79 ns |
| Helz          | helicase with zinc finger domain                                                                             | 78455  | 1.30  | 1.08  | 1.02 | 1.26 | 0.90 *   |
| Ppil5         | peptidylprolyl isomerase (cyclophilin) like 5                                                                | 69706  | 1.05  | 1.30  | 1.63 | 0.64 | -0.48 ns |
| Banp          | Btg3 associated nuclear protein                                                                              | 53325  | 0.41  | 0.38  | 0.39 | 1.05 | -0.16 ns |
| Metap1l       | methionine aminopeptidase-like 1                                                                             | 66559  | 0.55  | 0.54  | 0.25 | 2.22 | 0.78 ns  |
| Rbm6          | RNA binding motif protein 6                                                                                  | 19654  | 0.74  | 0.88  | 0.60 | 1.23 | 0.70 ns  |
| Smtn          | smoothelin                                                                                                   | 29856  | 1.03  | 1.09  | 1.41 | 0.73 | -0.78 ns |
| Hoxb8         | homeo box B8                                                                                                 | 15416  | 0.96  | 0.55  | 0.45 | 2.12 | 0.42 ns  |
| Ilkap         | integrin-linked kinase-associated serine/threonine phosphatase 2C                                            | 67444  | 0.97  | 1.03  | 0.91 | 1.05 | 0.56 ns  |
| Zfp36         | zinc finger protein 36                                                                                       | 22695  | 0.49  | 0.46  | 0.44 | 1.12 | -0.44 ns |
| Plaur         | plasminogen activator, urokinase receptor                                                                    | 18793  | 0.53  | 0.75  | 1.29 | 0.41 | -0.84 *  |
| Hmgb2         |                                                                                                              | 97165  | 6.21  | 7.21  | 7.80 | 0.79 | -0.01 ns |
| Hist1h2be     |                                                                                                              | 319179 | 1.31  | 0.94  | 0.81 | 1.61 | 0.80 ns  |
| Hist1h2bl     |                                                                                                              | 319185 | 1.31  | 0.94  | 0.81 | 1.61 | 0.80 ns  |
| Hist1h2bm     |                                                                                                              | 319186 | 1.31  | 0.94  | 0.81 | 1.61 | 0.80 ns  |
| Hist1h2bp     |                                                                                                              | 319188 | 1.31  | 0.94  | 0.81 | 1.61 | 0.80 ns  |
| LOC665622     |                                                                                                              | 665622 | 1.31  | 0.94  | 0.81 | 1.61 | 0.80 ns  |
| Nfya          | nuclear transcription factor-Y alpha                                                                         | 18044  | 1.44  | 1.35  | 1.07 | 1.34 | 0.37 ns  |
| Iscu          | IscU iron-sulfur cluster scaffold homolog (E. coli)                                                          | 66383  | 2.63  | 2.26  | 1.75 | 1.50 | 0.81 ns  |
| Mrpl21        | mitochondrial ribosomal protein L21                                                                          | 353242 | 1.68  | 1.48  | 1.02 | 1.64 | 0.83 *   |
| 1500032L24Rik | RIKEN cDNA 1500032L24 gene                                                                                   | 69029  | 3.27  | 3.31  | 3.16 | 1.03 | 0.21 ns  |
| Mrps28        | mitochondrial ribosomal protein S28                                                                          | 66230  | 0.87  | 1.14  | 0.93 | 0.93 | -0.53 ns |
| Anapc13       | anaphase promoting complex subunit 13                                                                        | 69010  | 1.98  | 2.21  | 1.85 | 1.06 | 0.45 ns  |
| Actr2         | ARP2 actin-related protein 2 homolog (yeast)                                                                 | 66713  | 4.82  | 4.81  | 6.30 | 0.76 | -0.75 ns |
| Ptk7          | PTK7 protein tyrosine kinase 7                                                                               | 71461  | 0.37  | 0.43  | 0.43 | 0.86 | -0.23 ns |
| Polr2k        | polymerase (RNA) II (DNA directed) polypeptide K                                                             | 17749  | 5.58  | 5.29  | 6.91 | 0.80 | -0.33 ns |
| 2310061C15Rik | RIKEN cDNA 2310061C15 gene                                                                                   | 66531  | 0.84  | 0.86  | 0.86 | 0.97 | 0.50 ns  |
| Gins1         | GINS complex subunit 1 (Psf1 homolog)                                                                        | 69270  | 0.91  | 1.02  | 1.08 | 0.84 | -0.26 ns |
| Taf6l         | TAF6-like RNA polymerase II, p300/CBP-associated factor (PCAF)-associated factor                             | 225895 | 1.03  | 0.64  | 0.52 | 1.97 | 0.78 ns  |
| 5330431N19Rik | RIKEN cDNA 5330431N19 gene                                                                                   | 226162 | 1.23  | 1.35  | 1.02 | 1.20 | 0.64 ns  |
| Stard13       | serologically defined colon cancer antigen 13                                                                | 243362 | 0.34  | 0.29  | 0.24 | 1.40 | 0.34 ns  |
| Thns1         | threonine synthase-like 1 (bacterial)                                                                        | 208967 | 0.31  | 0.34  | 0.32 | 0.96 | -0.23 ns |
| Mycbp         | c-myc binding protein                                                                                        | 56309  | 0.77  | 0.75  | 0.90 | 0.85 | -0.77 ns |
| Pcbd2         | pterin 4 alpha carbinolamine dehydratase/dimerization cofactor of hepatocyte nuclear factor 1 alpha (TCF1) 2 | 72562  | 0.93  | 1.04  | 0.80 | 1.15 | 0.61 ns  |
| Tradd         | TNFRSF1A-associated via death domain                                                                         | 71609  | 0.54  | 0.52  | 0.62 | 0.86 | -0.13 ns |
| Kctd2         | potassium channel tetramerisation domain containing 2                                                        | 70382  | 1.07  | 0.96  | 1.05 | 1.01 | 0.32 ns  |
| 1810014F10Rik | RIKEN cDNA 1810014F10 gene                                                                                   | 69064  | 0.19  | 0.30  | 0.52 | 0.37 | -0.80 ns |
| Senp6         | SUMO/sentrin specific peptidase 6                                                                            | 215351 | 1.86  | 1.60  | 1.19 | 1.55 | 0.95 **  |
| Bag5          | BCL2-associated athanogene 5                                                                                 | 70369  | 0.87  | 0.83  | 0.92 | 0.94 | 0.26 ns  |
| Bola1         | bolA-like 1 (E. coli)                                                                                        | 69168  | 0.59  | 0.64  | 0.60 | 0.99 | -0.43 ns |
| Trp53inp2     | transformation related protein 53 inducible nuclear protein 2                                                | 68728  | 0.75  | 0.69  | 0.99 | 0.75 | -0.51 ns |
| Tbrg1         | transforming growth factor beta regulated gene 1                                                             | 21376  | 3.00  | 2.46  | 2.38 | 1.26 | 0.88 *   |
| Rtn4          | reticulon 4                                                                                                  | 68585  | 10.10 | 9.47  | 9.47 | 1.06 | 0.18 ns  |
| Zdhhc2        | zinc finger, DHHC domain containing 2                                                                        | 70546  | 0.77  | 0.79  | 0.18 | 4.38 | 0.63 ns  |
| Zdhhc2        | zinc finger, DHHC domain containing 2                                                                        | 70546  | 0.23  | 0.30  | 0.05 | 4.51 | 0.66 ns  |
| Dek           | DEK oncogene (DNA binding)                                                                                   | 110052 | 9.03  | 8.82  | 9.63 | 0.93 | 0.24 ns  |
| Klhl7         | kelch-like 7 (Drosophila)                                                                                    | 52323  | 0.29  | 0.30  | 0.35 | 0.84 | -0.57 ns |
| Tfrc          | transferrin receptor                                                                                         | 22042  | 4.74  | 5.95  | 6.80 | 0.69 | -0.66 ns |
| Eif2s1        | eukaryotic translation initiation factor 2, subunit 1 alpha                                                  | 13665  | 5.12  | 5.13  | 5.40 | 0.94 | -0.06 ns |
| Tm7sf3        | transmembrane 7 superfamily member 3                                                                         | 67623  | 0.41  | 0.41  | 0.40 | 1.03 | -0.45 ns |

|               |                                                                                        |        |       |       |       |      |          |
|---------------|----------------------------------------------------------------------------------------|--------|-------|-------|-------|------|----------|
| Ttc27         | tetratricopeptide repeat domain 27                                                     | 74196  | 0.36  | 0.42  | 0.27  | 1.35 | 0.63 ns  |
| 2810012G03Rik | RIKEN cDNA 2810012G03 gene                                                             | 66306  | 0.88  | 0.92  | 0.93  | 0.95 | 0.42 ns  |
| Lman1         | lectin, mannose-binding, 1                                                             | 70361  | 1.24  | 1.24  | 1.33  | 0.93 | 0.28 ns  |
| Thoc5         | THO complex 5                                                                          | 107829 | 0.63  | 0.61  | 0.71  | 0.89 | -0.02 ns |
| Ranbp3        | RAN binding protein 3                                                                  | 71810  | 0.84  | 0.82  | 0.60  | 1.39 | 0.91 *   |
| Rbm22         | RNA binding motif protein 22                                                           | 66810  | 0.97  | 1.12  | 1.16  | 0.84 | 0.22 ns  |
| Pnpt1         | polyribonucleotide nucleotidyltransferase 1                                            | 71701  | 0.48  | 0.61  | 0.69  | 0.70 | -0.97 ** |
| Snrpd2        | small nuclear ribonucleoprotein D2                                                     | 107686 | 5.19  | 4.85  | 5.05  | 1.02 | 0.37 ns  |
| Dnajc8        |                                                                                        | 68598  | 3.53  | 3.46  | 3.25  | 1.08 | 0.65 ns  |
| 0610009O20Rik | RIKEN cDNA 0610009O20 gene                                                             | 66839  | 0.49  | 0.48  | 0.47  | 1.03 | 0.58 ns  |
| Zfp512        | zinc finger protein 512                                                                | 269639 | 1.21  | 1.16  | 1.13  | 1.07 | 0.83 *   |
| Rbm17         | RNA binding motif protein 17                                                           | 76938  | 2.60  | 2.75  | 2.17  | 1.19 | 0.66 ns  |
| Dhx35         | DEAH (Asp-Glu-Ala-His) box polypeptide 35                                              | 71715  | 0.60  | 0.56  | 0.62  | 0.97 | -0.38 ns |
| Ihpk1         | inositol hexaphosphate kinase 1                                                        | 27399  | 1.11  | 0.92  | 0.83  | 1.34 | 0.94 **  |
| Ctdp1         | CTD (carboxy-terminal domain, RNA polymerase II, polypeptide A) phosphatase, subunit 1 | 67655  | 0.49  | 0.57  | 0.52  | 0.94 | 0.46 ns  |
| Tsfm          | Ts translation elongation factor, mitochondrial                                        | 66399  | 0.72  | 0.57  | 0.59  | 1.21 | 0.55 ns  |
| Mett11d1      | methyltransferase 11 domain containing 1                                               | 52535  | 0.40  | 0.37  | 0.40  | 0.99 | 0.02 ns  |
| Kbtbd7        | kelch repeat and BTB (POZ) domain containing 7                                         | 211255 | 0.78  | 0.82  | 0.90  | 0.85 | -0.68 ns |
| Clcn7         | chloride channel 7                                                                     | 26373  | 0.47  | 0.47  | 0.36  | 1.27 | 0.58 ns  |
| Wdr57         | WD repeat domain 57 (U5 snRNP specific)                                                | 66585  | 1.36  | 1.21  | 2.06  | 0.65 | -0.66 ns |
| Tanc1         | tetratricopeptide repeat, ankyrin repeat and coiled-coil containing 1                  | 66860  | 1.58  | 1.23  | 0.88  | 1.79 | 0.34 ns  |
| 5730469M10Rik | RIKEN cDNA 5730469M10 gene                                                             | 70564  | 2.24  | 2.65  | 6.61  | 0.34 | -0.75 ns |
| Slc25a24      | solute carrier family 25 (mitochondrial carrier, phosphate carrier), member 24         | 229731 | 4.15  | 4.40  | 3.19  | 1.30 | 0.68 ns  |
| Zdhhc24       | zinc finger, DHHC domain containing 24                                                 | 70605  | 0.46  | 0.34  | 0.35  | 1.32 | 0.29 ns  |
| Ccdc53        | coiled-coil domain containing 53                                                       | 67282  | 1.04  | 1.06  | 1.03  | 1.00 | -0.47 ns |
| Rnaseh2a      | ribonuclease H2, large subunit                                                         | 69724  | 1.39  | 1.53  | 1.53  | 0.91 | -0.12 ns |
| Pih1d1        | PIH1 domain containing 1                                                               | 68845  | 0.55  | 0.77  | 0.84  | 0.66 | -0.60 ns |
| R3hdm2        | R3H domain containing 2                                                                | 71750  | 1.44  | 1.15  | 1.25  | 1.15 | 0.19 ns  |
| Rnaset2a      |                                                                                        | #####  | 5.78  | 5.56  | 6.47  | 0.89 | -0.65 ns |
| Rnaset2b      |                                                                                        | 68195  | 5.78  | 5.56  | 6.47  | 0.89 | -0.65 ns |
| R3hcc1        | R3H domain and coiled-coil containing 1                                                | 71843  | 0.48  | 0.48  | 0.48  | 0.99 | 0.13 ns  |
| 2810008M24Rik | RIKEN cDNA 2810008M24 gene                                                             | 75616  | 1.60  | 2.43  | 2.64  | 0.60 | -0.91 *  |
| Fbxo7         | F-box protein 7                                                                        | 69754  | 0.76  | 0.56  | 0.56  | 1.33 | 0.47 ns  |
| Myh10         | myosin, heavy polypeptide 10, non-muscle                                               | 77579  | 3.58  | 3.70  | 3.34  | 1.07 | 0.72 ns  |
| Pole3         | polymerase (DNA directed), epsilon 3 (p17 subunit)                                     | 59001  | 1.12  | 0.97  | 0.95  | 1.17 | 0.14 ns  |
| Atp13a2       | ATPase type 13A2                                                                       | 74772  | 0.52  | 0.43  | 0.54  | 0.96 | -0.43 ns |
| Papd1         | PAP associated domain containing 1                                                     | 67440  | 0.73  | 0.75  | 0.81  | 0.90 | 0.16 ns  |
| Crel2         | cysteine-rich with EGF-like domains 2                                                  | 76737  | 1.21  | 1.36  | 1.06  | 1.14 | 0.33 ns  |
| Eif4g2        | eukaryotic translation initiation factor 4, gamma 2                                    | 13690  | 11.18 | 11.08 | 11.88 | 0.94 | -0.67 ns |
| Ppflbp1       | PTPRF interacting protein, binding protein 1 (liprin beta 1)                           | 67533  | 0.88  | 0.88  | 0.76  | 1.15 | 0.08 ns  |
| 2510012J08Rik | RIKEN cDNA 2510012J08 gene                                                             | 70312  | 1.62  | 1.46  | 1.58  | 1.02 | -0.04 ns |
| Rrbp1         | ribosome binding protein 1                                                             | 81910  | 1.03  | 1.33  | 1.60  | 0.64 | -0.37 ns |
| Vkorc1        | vitamin K epoxide reductase complex, subunit 1                                         | 27973  | 0.96  | 1.05  | 1.12  | 0.85 | -0.31 ns |
| Acs13         | acyl-CoA synthetase long-chain family member 3                                         | 74205  | 1.26  | 0.98  | 1.08  | 1.16 | -0.10 ns |
| 5730494N06Rik | RIKEN cDNA 5730494N06 gene                                                             | 70612  | 1.86  | 1.81  | 1.95  | 0.95 | -0.16 ns |
| Nub1          | negative regulator of ubiquitin-like proteins 1                                        | 53312  | 0.68  | 0.73  | 0.87  | 0.78 | -0.93 ** |
| Gtf3c2        | general transcription factor IIIC, polypeptide 2, beta                                 | 71752  | 1.26  | 1.42  | 1.58  | 0.79 | -0.92 ** |
| Ilgav         | integrin alpha V                                                                       | 16410  | 5.07  | 5.26  | 4.06  | 1.24 | 0.25 ns  |
| 1700034H14Rik | RIKEN cDNA 1700034H14 gene                                                             | 67105  | 0.31  | 0.40  | 0.31  | 1.01 | 0.25 ns  |
| Prmt1         | protein arginine N-methyltransferase 1                                                 | 15469  | 2.97  | 3.16  | 3.33  | 0.89 | -0.59 ns |
| Snn           | stannin                                                                                | 20621  | 1.00  | 0.81  | 0.66  | 1.50 | 0.22 ns  |
| Ndufa3        | NADH dehydrogenase (ubiquinone) 1 alpha subcomplex, 3                                  | 66091  | 4.16  | 4.43  | 5.67  | 0.73 | -0.56 ns |
| Coq2          | coenzyme Q2 homolog, prenyltransferase (yeast)                                         | 71883  | 0.97  | 1.27  | 1.71  | 0.56 | -0.82 *  |
| Fcf1          | FCF1 small subunit (SSU) processome component homolog (S. cerevisiae)                  | 73736  | 2.73  | 3.09  | 3.62  | 0.75 | -0.69 ns |
| Fastkd3       | FAST kinase domains 3                                                                  | 69577  | 0.47  | 0.67  | 0.85  | 0.55 | -0.85 *  |
| Apo0          |                                                                                        | 68316  | 0.74  | 0.58  | 0.98  | 0.75 | -0.37 ns |
| D11Wsu47e     | DNA segment, Chr 11, Wayne State University 47, expressed                              | 276852 | 0.41  | 0.31  | 0.29  | 1.43 | 0.86 *   |
| Snupn         | snurportin 1                                                                           | 66069  | 0.33  | 0.36  | 0.34  | 0.97 | 0.38 ns  |
| Ints10        |                                                                                        | 70885  | 0.49  | 0.67  | 0.61  | 0.81 | -0.36 ns |
| LOC674888     |                                                                                        | 674888 | 0.49  | 0.67  | 0.61  | 0.81 | -0.36 ns |
| Brwd2         | bromodomain and WD repeat domain containing 2                                          | 207425 | 1.20  | 1.15  | 1.32  | 0.90 | -0.43 ns |
| Gstk1         | glutathione S-transferase kappa 1                                                      | 76263  | 0.30  | 0.47  | 0.83  | 0.36 | -0.85 *  |
| Fbxo21        | F-box protein 21                                                                       | 231670 | 0.56  | 0.47  | 0.57  | 0.97 | -0.21 ns |
| Cad           | carbamoyl-phosphate synthetase 2, aspartate transcarbamylase, and dihydroorotase       | 69719  | 0.75  | 0.87  | 0.74  | 1.01 | -0.18 ns |
| Ppat          | phosphoribosyl pyrophosphate amidotransferase                                          | 231327 | 1.06  | 1.01  | 1.16  | 0.90 | -0.73 ns |
| Rapgef2       | Rap guanine nucleotide exchange factor (GEF) 2                                         | 76089  | 1.92  | 1.91  | 1.78  | 1.07 | -0.42 ns |
| Lpin2         | lipin 2                                                                                | 64898  | 0.98  | 0.83  | 0.76  | 1.29 | 0.52 ns  |
| Ddx10         | DEAD (Asp-Glu-Ala-Asp) box polypeptide 10                                              | 77591  | 0.98  | 0.89  | 0.83  | 1.17 | 0.80 ns  |
| Dph5          | DPH5 homolog (S. cerevisiae)                                                           | 69740  | 0.51  | 0.59  | 0.49  | 1.02 | 0.31 ns  |
| Pou6f1        | POU domain, class 6, transcription factor 1                                            | 19009  | 0.72  | 0.56  | 0.72  | 0.99 | -0.10 ns |
| 2410008K03Rik | RIKEN cDNA 2410008K03 gene                                                             | 71962  | 0.37  | 0.32  | 0.27  | 1.39 | 0.16 ns  |
| Tmem181       | transmembrane protein 181                                                              | 77106  | 0.93  | 0.92  | 0.62  | 1.49 | 0.83 *   |
| Brms1l        | breast cancer metastasis-suppressor 1-like                                             | 52592  | 1.48  | 1.48  | 1.30  | 1.14 | 0.71 ns  |
| Twistnb       | TWIST neighbor                                                                         | 28071  | 1.10  | 1.16  | 1.27  | 0.86 | -0.45 ns |
| Sec63         | SEC63-like (S. cerevisiae)                                                             | 140740 | 0.91  | 0.64  | 0.54  | 1.70 | 0.65 ns  |
| Crebzf        | CREB/ATF bZIP transcription factor                                                     | 233490 | 0.85  | 0.82  | 0.74  | 1.14 | 0.09 ns  |
| Fbxl17        | F-box and leucine-rich repeat protein 17                                               | 50758  | 0.61  | 0.54  | 0.40  | 1.52 | 0.62 ns  |
| 2010300C02Rik |                                                                                        | 72097  | 0.73  | 0.82  | 0.84  | 0.87 | -0.46 ns |
| Nars          | asparaginyl-tRNA synthetase                                                            | 70223  | 4.06  | 4.54  | 4.12  | 0.98 | 0.35 ns  |
| Col4a3bp      | procollagen, type IV, alpha 3 (Goodpasture antigen) binding protein                    | 68018  | 1.34  | 1.52  | 1.64  | 0.81 | -0.37 ns |
| Ppif38b       | PRP38 pre-mRNA processing factor 38 (yeast) domain containing B                        | 66921  | 1.45  | 1.43  | 1.14  | 1.26 | 0.51 ns  |
| Apaf1         | apoptotic peptidase activating factor 1                                                | 11783  | 0.55  | 0.53  | 0.54  | 1.02 | -0.36 ns |
| 2510003E04Rik | RIKEN cDNA 2510003E04 gene                                                             | 72320  | 2.50  | 2.29  | 2.03  | 1.23 | 0.80 ns  |
| 2700029M09Rik | RIKEN cDNA 2700029M09 gene                                                             | 72612  | 3.17  | 2.98  | 3.37  | 0.93 | 0.24 ns  |

|               |                                                                                                  |        |       |       |       |      |          |
|---------------|--------------------------------------------------------------------------------------------------|--------|-------|-------|-------|------|----------|
| Znhit3        | zinc finger, HIT type 3                                                                          | 448850 | 0.46  | 0.48  | 0.78  | 0.59 | -0.86 *  |
| Sfrs2ip       | splicing factor, arginine/serine-rich 2, interacting protein                                     | 72193  | 2.46  | 2.28  | 2.78  | 0.88 | -0.61 ns |
| Tit15         | tubulin tyrosine ligase-like family, member 5                                                    | 320244 | 0.63  | 0.53  | 0.51  | 1.23 | 0.26 ns  |
| Fbxo45        | F-box protein 45                                                                                 | 268882 | 1.08  | 1.08  | 1.30  | 0.83 | -0.25 ns |
| Cdc215        | cell division cycle 2-like 5 (cholinesterase-related cell division controller)                   | 69562  | 1.08  | 1.00  | 1.16  | 0.92 | -0.42 ns |
| Vps36         | vacuolar protein sorting 36 (yeast)                                                              | 70160  | 0.64  | 0.76  | 0.62  | 1.02 | 0.22 ns  |
| Creb1         | cAMP responsive element binding protein 1                                                        | 12912  | 1.72  | 1.80  | 1.42  | 1.20 | 0.54 ns  |
| Dhrs13        | dehydrogenase/reductase (SDR family) member 13                                                   | 70451  | 0.83  | 0.82  | 0.67  | 1.24 | -0.13 ns |
| Galc          | galactosylceramidase                                                                             | 14420  | 0.32  | 0.34  | 0.38  | 0.85 | -0.73 ns |
| Dip2a         | DIP2 disco-interacting protein 2 homolog A (Drosophila)                                          | 64451  | 1.25  | 1.09  | 1.07  | 1.16 | 0.28 ns  |
| Prkar2a       | protein kinase, cAMP dependent regulatory, type II alpha                                         | 19087  | 1.76  | 1.69  | 1.54  | 1.13 | 0.72 ns  |
| Wbp7          | WW domain binding protein 7                                                                      | 75410  | 0.93  | 0.96  | 1.15  | 0.80 | -0.87 *  |
| Rfc5          | replication factor C (activator 1) 5                                                             | 72151  | 2.33  | 2.38  | 2.83  | 0.82 | -0.45 ns |
| D19Erd737e    | DNA segment, Chr 19, ERATO Doi 737, expressed                                                    | 76539  | 2.02  | 1.89  | 1.20  | 1.67 | 0.96 **  |
| Ppil2         | peptidylprolyl isomerase (cyclophilin)-like 2                                                    | 66053  | 1.50  | 1.51  | 1.79  | 0.84 | -0.56 ns |
| 2310007D09Rik | RIKEN cDNA 2310007D09 gene                                                                       | 71878  | 0.61  | 0.69  | 0.76  | 0.80 | 0.14 ns  |
| Clip1         | CAP-GLY domain containing linker protein 1                                                       | 56430  | 1.00  | 0.86  | 0.94  | 1.06 | 0.21 ns  |
| Tmem65        | transmembrane protein 65                                                                         | 74868  | 1.10  | 0.86  | 0.81  | 1.34 | 0.77 ns  |
| Ube2c         | ubiquitin-conjugating enzyme E2C                                                                 | 68612  | 7.90  | 7.61  | 8.46  | 0.93 | 0.31 ns  |
| D12Erd647e    | DNA segment, Chr 12, ERATO Doi 647, expressed                                                    | 52668  | 0.18  | 0.06  | 3.00  | 0.06 | -0.55 ns |
| Scyl3         | SCY1-like 3 (S. cerevisiae)                                                                      | 240880 | 0.59  | 0.62  | 0.55  | 1.06 | 0.07 ns  |
| Zmym2         | zinc finger, MYM-type 2                                                                          | 76007  | 1.38  | 1.27  | 1.16  | 1.19 | -0.02 ns |
| Upf3a         | UPF3 regulator of nonsense transcripts homolog A (yeast)                                         | 67031  | 0.65  | 0.97  | 0.90  | 0.72 | -0.23 ns |
| Ttc32         | tetratricopeptide repeat domain 32                                                               | 75516  | 0.32  | 0.44  | 0.39  | 0.82 | -0.39 ns |
| Zhx3          | zinc fingers and homeoboxes 3                                                                    | 320799 | 0.44  | 0.36  | 0.28  | 1.57 | 0.53 ns  |
| Igf1r         | insulin-like growth factor I receptor                                                            | 16001  | 2.84  | 2.56  | 1.99  | 1.42 | 0.15 ns  |
| Uaca          | uveal autoantigen with coiled-coil domains and ankyrin repeats                                   | 72565  | 0.28  | 0.30  | 0.32  | 0.86 | 0.39 ns  |
| 6820431F20Rik | RIKEN cDNA 6820431F20 gene                                                                       | 381598 | 5.32  | 4.85  | 4.91  | 1.08 | 0.33 ns  |
| Smnnc1        | survival motor neuron domain containing 1                                                        | 76479  | 1.32  | 1.43  | 1.26  | 1.05 | 0.22 ns  |
| Rnaseh2b      | ribonuclease H2, subunit B                                                                       | 67153  | 1.16  | 1.17  | 0.92  | 1.26 | 0.67 ns  |
| 3110082117Rik | RIKEN cDNA 3110082117 gene                                                                       | 73212  | 0.52  | 0.53  | 0.42  | 1.23 | 0.65 ns  |
| Iws1          | IWS1 homolog (S. cerevisiae)                                                                     | 73473  | 0.42  | 0.57  | 0.52  | 0.81 | 0.21 ns  |
| Zfp740        | zinc finger protein 740                                                                          | 68744  | 1.40  | 1.33  | 1.63  | 0.86 | -0.79 ns |
| Sec31a        | SEC31 homolog A (S. cerevisiae)                                                                  | 69162  | 0.95  | 0.92  | 0.91  | 1.04 | -0.06 ns |
| Nvl           | nuclear VCP-like                                                                                 | 67459  | 0.35  | 0.44  | 0.26  | 1.37 | -0.09 ns |
| 1810048J11Rik | RIKEN cDNA 1810048J11 gene                                                                       | 67708  | 0.41  | 0.44  | 0.37  | 1.12 | 0.07 ns  |
| Ankhd1        | ankyrin repeat and KH domain containing 1                                                        | 108857 | 0.88  | 1.01  | 0.94  | 0.93 | 0.27 ns  |
| 4631424J17Rik | RIKEN cDNA 4631424J17 gene                                                                       | 70802  | 0.74  | 0.55  | 0.57  | 1.30 | -0.07 ns |
| Zfp251        | zinc finger protein 251                                                                          | 71591  | 0.47  | 0.41  | 0.49  | 0.96 | 0.34 ns  |
| Lnp           | limb and neural patterns                                                                         | 69605  | 0.55  | 0.47  | 0.46  | 1.19 | 0.61 ns  |
| 4930422G04Rik | RIKEN cDNA 4930422G04 gene                                                                       | 71643  | 0.57  | 0.63  | 0.61  | 0.93 | 0.17 ns  |
| Zfp335        | zinc finger protein 335                                                                          | 329559 | 0.60  | 0.56  | 0.54  | 1.10 | 0.04 ns  |
| Cltb          | clathrin, light polypeptide (Lcb)                                                                | 74325  | 0.70  | 0.80  | 1.29  | 0.54 | -0.53 ns |
| Etaa1         | Ewing's tumor-associated antigen 1                                                               | 68145  | 0.42  | 0.45  | 0.70  | 0.60 | -0.67 ns |
| Kdelc2        | KDEL (Lys-Asp-Glu-Leu) containing 2                                                              | 68304  | 0.44  | 0.39  | 0.21  | 2.08 | 0.67 ns  |
| Gpr160        | G protein-coupled receptor 160                                                                   | 71862  | 0.84  | 0.83  | 0.44  | 1.88 | 0.51 ns  |
| Rab10         | RAB10, member RAS oncogene family                                                                | 19325  | 5.51  | 5.51  | 5.37  | 1.02 | -0.22 ns |
| EG622236      |                                                                                                  | 622236 | 6.66  | 8.31  | 8.09  | 0.82 | -0.71 ns |
| Ubtf          | upstream binding transcription factor, RNA polymerase I                                          | 21429  | 1.44  | 1.35  | 1.01  | 1.41 | 0.83 *   |
| Csnk2a2       | casein kinase 2, alpha prime polypeptide                                                         | 13000  | 1.66  | 1.98  | 1.85  | 0.89 | -0.20 ns |
| Rnmt          | RNA (guanine-7-) methyltransferase                                                               | 67897  | 0.59  | 0.62  | 0.66  | 0.90 | 0.26 ns  |
| 4933413G19Rik |                                                                                                  | 71149  | 1.17  | 1.30  | 1.69  | 0.69 | -0.12 ns |
| Foxm1         |                                                                                                  | 14235  | 1.17  | 1.30  | 1.69  | 0.69 | -0.12 ns |
| Arsk          | arylsulfatase K                                                                                  | 77041  | 0.24  | 0.29  | 0.29  | 0.82 | -0.58 ns |
| Wdsub1        | WD repeat, SAM and U-box domain containing 1                                                     | 72137  | 0.36  | 0.32  | 0.33  | 1.09 | -0.44 ns |
| Rpl22         | ribosomal protein L22                                                                            | 19934  | 16.33 | 15.39 | 15.20 | 1.07 | 0.86 *   |
| Txndc13       | thioredoxin domain containing 13                                                                 | 52837  | 1.30  | 1.18  | 1.06  | 1.22 | 0.38 ns  |
| Rgs12         | regulator of G-protein signaling 12                                                              | 71729  | 0.31  | 0.38  | 0.36  | 0.84 | -0.19 ns |
| Fbxo30        | F-box protein 30                                                                                 | 71865  | 0.72  | 0.64  | 0.56  | 1.27 | 0.69 ns  |
| Nudt12        | nudix (nucleoside diphosphate linked moiety X)-type motif 12                                     | 67993  | 0.45  | 0.68  | 0.38  | 1.18 | 0.35 ns  |
| Tmem50a       | transmembrane protein 50A                                                                        | 71817  | 1.00  | 1.01  | 1.40  | 0.71 | -0.66 ns |
| Ccdc109a      | coiled-coil domain containing 109A                                                               | 215999 | 1.05  | 0.99  | 0.77  | 1.36 | 0.12 ns  |
| Gtf2h1        | general transcription factor II H, polypeptide 1                                                 | 14884  | 0.51  | 0.49  | 0.51  | 0.98 | -0.37 ns |
| 2310005E10Rik | RIKEN cDNA 2310005E10 gene                                                                       | 67861  | 0.32  | 0.21  | 0.44  | 0.72 | -0.55 ns |
| Plscr1        | phospholipid scramblase 1                                                                        | 22038  | 0.99  | 1.12  | 1.19  | 0.83 | -0.40 ns |
| Smpd4         | sphingomyelin phosphodiesterase 4                                                                | 77626  | 0.71  | 0.69  | 0.94  | 0.75 | -0.50 ns |
| 1110034A24Rik | RIKEN cDNA 1110034A24 gene                                                                       | 109065 | 0.67  | 0.66  | 0.82  | 0.81 | -0.02 ns |
| Acbd6         | acyl-Coenzyme A binding domain containing 6                                                      | 72482  | 0.66  | 0.58  | 0.43  | 1.53 | 0.75 ns  |
| Rai1          | retinoic acid induced 1                                                                          | 19377  | 0.78  | 0.83  | 0.76  | 1.02 | 0.04 ns  |
| Acad9         | acyl-Coenzyme A dehydrogenase family, member 9                                                   | 229211 | 0.54  | 0.61  | 0.47  | 1.14 | 0.27 ns  |
| 2700089E24Rik | RIKEN cDNA 2700089E24 gene                                                                       | 381820 | 1.55  | 1.54  | 0.96  | 1.60 | 0.87 *   |
| Brf1          | BRF1 homolog, subunit of RNA polymerase III transcription initiation factor IIIB (S. cerevisiae) | 72308  | 0.44  | 0.46  | 0.44  | 0.99 | 0.46 ns  |
| 3000004C01Rik | RIKEN cDNA 3000004C01 gene                                                                       | 70218  | 0.71  | 0.82  | 0.92  | 0.77 | 0.10 ns  |
| Uqcrh         | ubiquinol-cytochrome c reductase hinge protein                                                   | 66576  | 4.79  | 4.81  | 4.97  | 0.96 | -0.13 ns |
| Cdk11         | cyclin-dependent kinase-like 1 (CDC2-related kinase)                                             | 71091  | 1.78  | 2.22  | 1.28  | 1.38 | -0.14 ns |
| Zfp618        | zinc finger protein 618                                                                          | 72701  | 0.59  | 0.50  | 0.30  | 1.99 | 0.64 ns  |
| Rpsud1        | RNA pseudouridylylate synthase domain containing 1                                               | 106707 | 0.47  | 0.37  | 0.25  | 1.90 | 0.83 *   |
| Polr3c        | polymerase (RNA) III (DNA directed) polypeptide C                                                | 74414  | 1.05  | 1.25  | 1.19  | 0.88 | -0.72 ns |
| Agpat5        | 1-acylglycerol-3-phosphate O-acyltransferase 5 (lysophosphatidic acid acyltransferase, epsilon)  | 52123  | 1.36  | 1.20  | 1.77  | 0.76 | -0.08 ns |
| Marveld3      | MARVEL (membrane-associating) domain containing 3                                                | 73608  | 0.67  | 0.67  | 0.41  | 1.62 | 0.46 ns  |
| Phf14         | PHD finger protein 14                                                                            | 75725  | 1.40  | 1.67  | 1.47  | 0.95 | -0.55 ns |
| Cxadr         | coxsackievirus and adenovirus receptor                                                           | 13052  | 2.72  | 2.47  | 2.36  | 1.15 | -0.16 ns |
| Pgm1          | phosphoglucomutase 1                                                                             | 66681  | 0.33  | 0.37  | 0.40  | 0.82 | 0.06 ns  |
| Plxna2        | plexin A2                                                                                        | 18845  | 0.25  | 0.39  | 0.35  | 0.72 | 0.19 ns  |
| Ly6e          | lymphocyte antigen 6 complex, locus E                                                            | 17069  | 0.64  | 1.57  | 11.70 | 0.05 | -0.67 ns |

|               |                                                                                           |        |       |       |       |      |           |
|---------------|-------------------------------------------------------------------------------------------|--------|-------|-------|-------|------|-----------|
| Iqwd1         | IQ motif and WD repeats 1                                                                 | 74106  | 0.50  | 0.55  | 0.45  | 1.10 | -0.30 ns  |
| 2610039C10Rik | RIKEN cDNA 2610039C10 gene                                                                | 66578  | 2.18  | 2.11  | 3.05  | 0.71 | -0.50 ns  |
| Cdc40         | cell division cycle 40 homolog (yeast)                                                    | 71713  | 1.01  | 0.93  | 0.91  | 1.10 | 0.53 ns   |
| Vrk2          | vaccinia related kinase 2                                                                 | 69922  | 0.27  | 0.34  | 0.49  | 0.56 | -0.59 ns  |
| Npal1         | NIPA-like domain containing 1                                                             | 70701  | 0.70  | 0.85  | 0.69  | 1.00 | -0.53 ns  |
| Tex9          | testis expressed gene 9                                                                   | 21778  | 0.37  | 0.32  | 0.20  | 1.83 | 0.85 *    |
| Sh2d4a        | SH2 domain containing 4A                                                                  | 72281  | 1.59  | 2.04  | 1.78  | 0.89 | -0.59 ns  |
| Dennd1b       | DENN/MADD domain containing 1B                                                            | 329260 | 0.42  | 0.43  | 0.21  | 2.00 | 0.57 ns   |
| Ccnt2         | Cyclin T2                                                                                 | 72949  | 0.99  | 0.90  | 0.74  | 1.34 | 0.24 ns   |
| Sec14l1       | SEC14-like 1 (S. cerevisiae)                                                              | 74136  | 0.90  | 0.92  | 0.95  | 0.94 | -0.46 ns  |
| Gas2l3        | growth arrest-specific 2 like 3                                                           | 237436 | 1.33  | 1.33  | 1.07  | 1.24 | 0.66 ns   |
| Rps15a        | ribosomal protein S15a                                                                    | 267019 | 14.65 | 14.90 | 14.48 | 1.01 | -0.44 ns  |
| D630002J15Rik | RIKEN cDNA D630002J15 gene                                                                | 77522  | 0.78  | 0.69  | 0.45  | 1.70 | -0.34 ns  |
| Depdc6        | DEP domain containing 6                                                                   | 97998  | 0.34  | 0.26  | 0.25  | 1.37 | 0.13 ns   |
| Plp2          | proteolipid protein 2                                                                     | 18824  | 5.27  | 5.19  | 6.50  | 0.81 | 0.11 ns   |
| Ccdc18        | coiled-coil domain containing 18                                                          | 73254  | 0.23  | 0.27  | 0.38  | 0.60 | -0.73 ns  |
| Erp29         | endoplasmic reticulum protein 29                                                          | 67397  | 1.21  | 1.51  | 1.59  | 0.76 | -0.64 ns  |
| Brp44l        | brain protein 44-like                                                                     | 55951  | 1.13  | 1.00  | 0.60  | 1.88 | 0.74 ns   |
| Nphp1         | nephronophthisis 1 (juvenile) homolog (human)                                             | 53885  | 0.52  | 0.74  | 0.65  | 0.79 | -0.65 ns  |
| Mrps7         | mitochondrial ribosomal protein S7                                                        | 50529  | 1.37  | 1.33  | 1.45  | 0.94 | 0.00 ns   |
| Mrps17        | mitochondrial ribosomal protein S17                                                       | 66258  | 1.57  | 1.62  | 1.76  | 0.89 | -0.25 ns  |
| Tmem77        | transmembrane protein 77                                                                  | 67171  | 1.52  | 1.47  | 1.37  | 1.11 | 0.62 ns   |
| Atrx          | alpha thalassemia/mental retardation syndrome X-linked homolog (human)                    | 22589  | 0.23  | 0.24  | 0.65  | 0.36 | -0.79 ns  |
| Nt5m          | 5',3'-nucleotidase, mitochondrial                                                         | 103850 | 0.42  | 0.36  | 0.37  | 1.13 | 0.33 ns   |
| Orc4l         | origin recognition complex, subunit 4-like (S. cerevisiae)                                | 26428  | 1.01  | 0.84  | 0.71  | 1.41 | 0.83 *    |
| N6amt1        | N-6 adenine-specific DNA methyltransferase 1 (putative)                                   | 67768  | 0.31  | 0.36  | 0.21  | 1.45 | 0.15 ns   |
| Rnaseh1       | ribonuclease H1                                                                           | 19819  | 0.28  | 0.39  | 0.41  | 0.69 | -0.46 ns  |
| Zbed3         | zinc finger, BED domain containing 3                                                      | 72114  | 0.42  | 0.44  | 0.35  | 1.22 | 0.65 ns   |
| Otud5         | OTU domain containing 5                                                                   | 54644  | 0.61  | 0.72  | 0.72  | 0.85 | 0.30 ns   |
| Slc37a3       | solute carrier family 37 (glycerol-3-phosphate transporter), member 3                     | 72144  | 0.66  | 0.74  | 0.80  | 0.81 | -0.74 ns  |
| Ssb           | Sjogren syndrome antigen B                                                                | 20823  | 2.17  | 1.99  | 1.54  | 1.40 | 0.20 ns   |
| Mett10d       | methyltransferase 10 domain containing                                                    | 67493  | 0.41  | 0.43  | 0.49  | 0.84 | -0.98 *** |
| Exosc10       | exosome component 10                                                                      | 50912  | 1.36  | 1.36  | 1.53  | 0.89 | 0.01 ns   |
| Usp21         | ubiquitin specific peptidase 21                                                           | 30941  | 0.89  | 0.74  | 0.60  | 1.47 | 0.67 ns   |
| Usp15         | ubiquitin specific peptidase 15                                                           | 14479  | 0.92  | 0.84  | 0.74  | 1.23 | 0.29 ns   |
| Pex3          | peroxisomal biogenesis factor 3                                                           | 56535  | 0.85  | 0.70  | 0.51  | 1.66 | 0.56 ns   |
| Pgs1          | phosphatidylglycerophosphate synthase 1                                                   | 74451  | 0.63  | 0.58  | 0.77  | 0.82 | -0.29 ns  |
| 2410017P07Rik | RIKEN cDNA 2410017P07 gene                                                                | 103268 | 0.70  | 0.64  | 0.58  | 1.21 | 0.61 ns   |
| Rnf138        | ring finger protein 138                                                                   | 56515  | 0.68  | 0.85  | 0.84  | 0.80 | -0.21 ns  |
| Rsrc2         | arginine/serine-rich coiled-coil 2                                                        | 208606 | 2.78  | 2.72  | 2.92  | 0.95 | -0.51 ns  |
| Gal3st1       | galactose-3-O-sulfotransferase 1                                                          | 53897  | 0.59  | 0.51  | 0.46  | 1.27 | 0.48 ns   |
| Gtf2h3        | general transcription factor IIH, polypeptide 3                                           | 209357 | 0.53  | 0.47  | 0.48  | 1.10 | 0.66 ns   |
| Jmjd6         | jumonji domain containing 6                                                               | 107817 | 0.52  | 0.61  | 1.11  | 0.47 | -0.64 ns  |
| Mterfd1       | MTERF domain containing 1                                                                 | 66410  | 0.78  | 1.20  | 1.44  | 0.54 | -0.92 **  |
| 4921524J17Rik | RIKEN cDNA 4921524J17 gene                                                                | 66714  | 0.92  | 0.96  | 1.15  | 0.80 | -0.46 ns  |
| 0610007P14Rik | RIKEN cDNA 0610007P14 gene                                                                | 58520  | 2.16  | 1.98  | 2.53  | 0.85 | -0.48 ns  |
| Cyba          | cytochrome b-245, alpha polypeptide                                                       | 13057  | 1.16  | 1.16  | 0.50  | 2.32 | 0.47 ns   |
| Intu          | inturned planar cell polarity effector homolog (Drosophila)                               | 380614 | 0.50  | 0.38  | 0.41  | 1.22 | 0.69 ns   |
| Tspan12       | tetraspanin 12                                                                            | 269831 | 0.66  | 1.07  | 1.57  | 0.42 | -0.83 *   |
| Pi4k2a        | phosphatidylinositol 4-kinase type 2 alpha                                                | 84095  | 0.60  | 0.73  | 0.56  | 1.08 | 0.22 ns   |
| 4933426M11Rik | RIKEN cDNA 4933426M11 gene                                                                | 217684 | 0.52  | 0.49  | 0.90  | 0.58 | -0.84 *   |
| 6430527G18Rik | RIKEN cDNA 6430527G18 gene                                                                | 238330 | 9.75  | 9.05  | 8.65  | 1.12 | 0.05 ns   |
| Sept7         | septin 7                                                                                  | 235072 | 6.75  | 5.42  | 4.12  | 1.63 | 0.96 **   |
| 1810013D10Rik | RIKEN cDNA 1810013D10 gene                                                                | 66278  | 0.55  | 0.54  | 0.49  | 1.10 | 0.22 ns   |
| Arrdc3        | arrestin domain containing 3                                                              | 105171 | 1.28  | 1.48  | 2.38  | 0.54 | -0.94 **  |
| LOC639593     |                                                                                           | 639593 | 19.77 | 18.50 | 16.22 | 1.21 | 0.93 **   |
| Phf6          | PHD finger protein 6                                                                      | 70998  | 0.37  | 0.59  | 0.65  | 0.56 | -0.58 ns  |
| Cltc          | clathrin, heavy polypeptide (Hc)                                                          | 67300  | 6.38  | 6.57  | 7.84  | 0.81 | -0.92 **  |
| EG666642      |                                                                                           | 666642 | 20.13 | 20.70 | 17.09 | 1.17 | 0.87 *    |
| LOC433941     |                                                                                           | 433941 | 20.13 | 20.70 | 17.09 | 1.17 | 0.87 *    |
| LOC622707     |                                                                                           | 622707 | 20.13 | 20.70 | 17.09 | 1.17 | 0.87 *    |
| LOC665032     |                                                                                           | 665032 | 20.13 | 20.70 | 17.09 | 1.17 | 0.87 *    |
| LOC669999     |                                                                                           | 669999 | 20.13 | 20.70 | 17.09 | 1.17 | 0.87 *    |
| Rpl29         |                                                                                           | 19944  | 20.13 | 20.70 | 17.09 | 1.17 | 0.87 *    |
| Samd14        | sterile alpha motif domain containing 14                                                  | 217125 | 0.47  | 0.42  | 0.41  | 1.14 | 0.79 ns   |
| Gtf2a1        | General transcription factor II A, 1                                                      | 83602  | 1.18  | 1.23  | 1.21  | 0.97 | -0.41 ns  |
| Fbxl3         | F-box and leucine-rich repeat protein 3                                                   | 50789  | 1.07  | 0.92  | 1.09  | 0.98 | -0.33 ns  |
| Cbx5          | chromobox homolog 5 (Drosophila HP1a)                                                     | 12419  | 5.04  | 5.18  | 4.60  | 1.09 | 0.47 ns   |
| Chchd7        | coiled-coil-helix-coiled-coil-helix domain containing 7                                   | 66433  | 0.30  | 0.39  | 0.11  | 2.72 | 0.71 ns   |
| Cggbp1        | CGG triplet repeat binding protein 1                                                      | 106143 | 6.69  | 6.50  | 6.38  | 1.04 | -0.30 ns  |
| 6330569M22Rik | RIKEN cDNA 6330569M22 gene                                                                | 229707 | 0.79  | 0.89  | 0.78  | 1.01 | -0.24 ns  |
| Mgrn1         | mahogunin, ring finger 1                                                                  | 17237  | 1.10  | 0.84  | 1.26  | 0.87 | -0.61 ns  |
| Acad11        | acyl-Coenzyme A dehydrogenase family, member 11                                           | 102632 | 0.64  | 0.48  | 0.42  | 1.54 | 0.88 *    |
| D10Wsu102e    | DNA segment, Chr 10, Wayne State University 102, expressed                                | 28109  | 1.26  | 1.16  | 0.94  | 1.33 | 0.45 ns   |
| Srd5a1        | steroid 5 alpha-reductase 1                                                               | 78925  | 1.53  | 2.10  | 2.72  | 0.56 | -0.89 *   |
| Zranb2        | zinc finger, RAN-binding domain containing 2                                              | 53861  | 3.31  | 3.34  | 3.21  | 1.02 | -0.22 ns  |
| Dirc2         | disrupted in renal carcinoma 2 (human)                                                    | 224132 | 0.36  | 0.39  | 0.46  | 0.79 | -0.80 ns  |
| Spata13       | spermatogenesis associated 13                                                             | 219140 | 0.48  | 0.46  | 0.14  | 3.45 | -0.01 ns  |
| Mak10         | MAK10 homolog, amino-acid N-acetyltransferase subunit, (S. cerevisiae)                    | 78689  | 2.03  | 2.08  | 2.06  | 0.98 | 0.23 ns   |
| Ilvb1         | ilvB (bacterial acetolactate synthase)-like                                               | 216136 | 0.87  | 0.75  | 0.42  | 2.04 | 0.65 ns   |
| Dctd          | dCMP deaminase                                                                            | 320685 | 0.44  | 0.49  | 0.31  | 1.42 | 0.06 ns   |
| Atp5g3        | ATP synthase, H+ transporting, mitochondrial F0 complex, subunit c (subunit 9), isoform 3 | 228033 | 14.45 | 12.31 | 9.73  | 1.48 | 0.62 ns   |
| Klf3          | Kruppel-like factor 3 (basic)                                                             | 16599  | 2.14  | 2.50  | 2.13  | 1.00 | -0.06 ns  |
| Snx8          | sorting nexin 8                                                                           | 231834 | 0.39  | 0.39  | 0.41  | 0.94 | -0.39 ns  |
| Zubr1         | zinc finger, UBR1 type 1                                                                  | 69116  | 1.15  | 1.26  | 1.56  | 0.74 | -0.81 ns  |

|               |                                                                     |        |       |       |       |      |          |
|---------------|---------------------------------------------------------------------|--------|-------|-------|-------|------|----------|
| Tmem11        | transmembrane protein 11                                            | 216821 | 0.85  | 0.77  | 0.92  | 0.92 | -0.63 ns |
| Rere          | arginine glutamic acid dipeptide (RE) repeats                       | 68703  | 1.40  | 1.25  | 1.17  | 1.19 | 0.65 ns  |
| Insig1        | insulin induced gene 1                                              | 231070 | 1.35  | 1.42  | 1.76  | 0.76 | -0.73 ns |
| Wasf2         | WAS protein family, member 2                                        | 242687 | 2.83  | 2.60  | 3.21  | 0.88 | -0.51 ns |
| Thra          | thyroid hormone receptor alpha                                      | 21833  | 0.69  | 0.58  | 0.66  | 1.05 | 0.25 ns  |
| Timp2         | tissue inhibitor of metalloproteinase 2                             | 21858  | 4.13  | 3.79  | 3.11  | 1.32 | 0.70 ns  |
| A130022J15Rik | RIKEN cDNA A130022J15 gene                                          | 101351 | 0.37  | 0.32  | 0.34  | 1.07 | 0.36 ns  |
| D5Erd579e     | DNA segment, Chr 5, ERATO Doi 579, expressed                        | 320661 | 1.85  | 1.99  | 2.17  | 0.85 | -0.55 ns |
| Rbm35a        | RNA binding motif protein 35A                                       | 207920 | 2.59  | 2.48  | 2.44  | 1.06 | 0.18 ns  |
| A430005L14Rik | RIKEN cDNA A430005L14 gene                                          | 97159  | 0.69  | 0.83  | 1.27  | 0.54 | -0.50 ns |
| Gpr146        | G protein-coupled receptor 146                                      | 80290  | 0.30  | 0.32  | 0.27  | 1.12 | -0.22 ns |
| Srrm1         | serine/arginine repetitive matrix 1                                 | 51796  | 2.09  | 1.84  | 2.50  | 0.83 | -0.45 ns |
| lkbkg         | inhibitor of kappaB kinase gamma                                    | 16151  | 0.52  | 0.50  | 0.79  | 0.65 | -0.64 ns |
| Top2a         | topoisomerase (DNA) II alpha                                        | 21973  | 6.98  | 6.89  | 9.04  | 0.77 | -0.02 ns |
| Lrfn4         | leucine rich repeat and fibronectin type III domain containing 4    | 225875 | 0.67  | 0.59  | 0.37  | 1.79 | 0.86 *   |
| Scarb2        | scavenger receptor class B, member 2                                | 12492  | 0.44  | 1.36  | 0.94  | 0.47 | -0.65 ns |
| D15Erd621e    | DNA segment, Chr 15, ERATO Doi 621, expressed                       | 210998 | 2.82  | 2.19  | 2.51  | 1.12 | 0.30 ns  |
| Uvrag         | UV radiation resistance associated gene                             | 78610  | 0.65  | 0.51  | 0.63  | 1.02 | -0.21 ns |
| Ablim1        | actin-binding LIM protein 1                                         | 226251 | 1.87  | 2.02  | 1.34  | 1.39 | 0.49 ns  |
| Phgdh         |                                                                     | 236539 | 9.17  | 9.98  | 6.45  | 1.41 | 0.67 ns  |
| Ankrd27       | ankyrin repeat domain 27 (VPS9 domain)                              | 245886 | 0.64  | 0.69  | 0.70  | 0.91 | -0.06 ns |
| Pten          | phosphatase and tensin homolog                                      | 19211  | 2.76  | 2.46  | 2.23  | 1.23 | 0.95 **  |
| 1110033M05Rik | RIKEN cDNA 1110033M05 gene                                          | 68675  | 0.23  | 0.39  | 0.43  | 0.53 | -0.53 ns |
| Tra2a         | transformer 2 alpha homolog (Drosophila)                            | 101214 | 1.98  | 2.35  | 2.06  | 0.96 | -0.48 ns |
| Afap111       | actin filament associated protein 1-like 1                          | 106877 | 1.02  | 0.99  | 0.67  | 1.50 | 0.76 ns  |
| Tapt1         | transmembrane anterior posterior transformation 1                   | 231225 | 0.87  | 0.92  | 1.05  | 0.82 | -0.82 *  |
| Myo10         | myosin X                                                            | 17909  | 0.80  | 0.83  | 1.16  | 0.69 | -0.72 ns |
| Mtap1s        | microtubule-associated protein 1S                                   | 270058 | 0.48  | 0.32  | 0.38  | 1.28 | 0.67 ns  |
| Odf2          | outer dense fiber of sperm tails 2                                  | 18286  | 1.19  | 1.32  | 1.12  | 1.06 | 0.60 ns  |
| Ankrd57       | ankyrin repeat domain 57                                            | 268301 | 0.70  | 0.94  | 0.70  | 0.99 | -0.23 ns |
| Pex6          | peroxisomal biogenesis factor 6                                     | 224824 | 1.35  | 1.22  | 1.05  | 1.28 | 0.86 *   |
| Cdc27         | cell division cycle 27 homolog (S. cerevisiae)                      | 217232 | 1.11  | 1.06  | 1.23  | 0.90 | -0.71 ns |
| Mib1          | mindbomb homolog 1 (Drosophila)                                     | 225164 | 0.79  | 0.87  | 1.19  | 0.67 | -0.62 ns |
| Tmem164       | transmembrane protein 164                                           | 209497 | 0.52  | 0.56  | 0.65  | 0.80 | -0.01 ns |
| Rasgef1b      | RasGEF domain family, member 1B                                     | 320292 | 0.48  | 0.39  | 0.49  | 0.98 | -0.34 ns |
| Nup205        | nucleoporin 205                                                     | 70699  | 1.93  | 2.16  | 3.02  | 0.64 | -0.62 ns |
| F630043A04Rik | RIKEN cDNA F630043A04 gene                                          | 219114 | 0.35  | 0.40  | 0.27  | 1.27 | 0.42 ns  |
| Arhgap29      | Rho GTPase activating protein 29                                    | 214137 | 5.86  | 5.43  | 3.99  | 1.46 | 0.17 ns  |
| BC057552      | cDNA sequence BC057552                                              | 212123 | 0.66  | 0.70  | 0.77  | 0.84 | -0.13 ns |
| G430022H21Rik | RIKEN cDNA G430022H21 gene                                          | 210529 | 0.76  | 0.80  | 0.62  | 1.22 | 0.61 ns  |
| Rnpepl1       | arginyl aminopeptidase (aminopeptidase B)-like 1                    | 108657 | 1.40  | 1.30  | 1.01  | 1.38 | 0.60 ns  |
| Aamp          | angio-associated migratory protein                                  | 227290 | 2.18  | 1.84  | 1.85  | 1.17 | 0.13 ns  |
| Lrch3         | leucine-rich repeats and calponin homology (CH) domain containing 3 | 70144  | 1.00  | 0.61  | 0.85  | 1.16 | 0.40 ns  |
| Git1          | G protein-coupled receptor kinase-interactor 1                      | 216963 | 0.37  | 0.46  | 0.37  | 1.01 | 0.33 ns  |
| Htatsf1       | HIV TAT specific factor 1                                           | 72459  | 1.26  | 1.52  | 1.61  | 0.78 | -0.35 ns |
| Slc38a1       | solute carrier family 38, member 1                                  | 105727 | 1.71  | 1.64  | 1.25  | 1.36 | 0.71 ns  |
| Gtf3c3        | general transcription factor IIIC, polypeptide 3                    | 98488  | 0.45  | 0.44  | 0.45  | 0.99 | -0.39 ns |
| C730024G19Rik | RIKEN cDNA C730024G19 gene                                          | 232566 | 0.31  | 0.32  | 0.42  | 0.73 | -0.47 ns |
| LOC100046680  | hypothetical protein LOC100046680                                   | #####  | 0.39  | 0.35  | 0.32  | 1.19 | 0.59 ns  |
| Rxra          | retinoid X receptor alpha                                           | 20181  | 0.73  | 0.72  | 0.42  | 1.73 | 0.66 ns  |
| Zfp445        | zinc finger protein 445                                             | 235682 | 2.52  | 2.34  | 1.99  | 1.26 | 0.80 ns  |
| Ehmt1         | euchromatic histone methyltransferase 1                             | 77683  | 1.66  | 1.70  | 1.19  | 1.38 | 0.50 ns  |
| LOC100048156  | similar to ribosomal protein S28                                    | #####  | 23.62 | 21.73 | 16.03 | 1.47 | 0.85 *   |
| Il13ra1       | interleukin 13 receptor, alpha 1                                    | 16164  | 0.41  | 0.54  | 1.10  | 0.37 | -0.85 *  |
| Dusp11        | dual specificity phosphatase 11 (RNA/RNP complex 1-interacting)     | 72102  | 1.39  | 1.43  | 1.84  | 0.75 | -0.82 *  |
| Zdhhc9        | zinc finger, DHHC domain containing 9                               | 208884 | 0.24  | 0.17  | 0.40  | 0.58 | -0.72 ns |
| Arl4c         |                                                                     | 320982 | 3.03  | 3.06  | 1.59  | 1.90 | 0.18 ns  |
| LOC632433     |                                                                     | 632433 | 3.03  | 3.06  | 1.59  | 1.90 | 0.18 ns  |
| Wdr35         | WD repeat domain 35                                                 | 74682  | 1.03  | 0.99  | 0.85  | 1.21 | 0.31 ns  |
| Sephs1        | selenophosphate synthetase 1                                        | 109079 | 1.19  | 1.11  | 0.97  | 1.22 | 0.65 ns  |
| Spast         | spastin                                                             | 50850  | 1.31  | 1.21  | 0.99  | 1.32 | 0.93 **  |
| Cobl1         | Cobl-like 1                                                         | 319876 | 1.94  | 1.75  | 1.15  | 1.67 | 0.34 ns  |
| Tmem55b       | transmembrane protein 55b                                           | 219024 | 1.30  | 1.34  | 1.43  | 0.91 | -0.77 ns |
| Morn2         | MORN repeat containing 2                                            | 378462 | 0.47  | 0.42  | 0.23  | 2.04 | 0.64 ns  |
| Arih2         | ariadne homolog 2 (Drosophila)                                      | 23807  | 2.01  | 1.98  | 2.69  | 0.74 | 0.06 ns  |
| Nploc4        | nuclear protein localization 4 homolog (S. cerevisiae)              | 217365 | 0.89  | 0.84  | 1.00  | 0.89 | 0.27 ns  |
| Snx12         | sorting nexin 12                                                    | 55988  | 0.61  | 0.66  | 0.93  | 0.65 | -0.54 ns |
| Efha1         | EF hand domain family A1                                            | 68514  | 1.30  | 1.74  | 1.66  | 0.78 | -0.18 ns |
| Ncoa7         | nuclear receptor coactivator 7                                      | 211329 | 0.36  | 0.35  | 0.28  | 1.30 | 0.33 ns  |
| Vps8          | vacuolar protein sorting 8 homolog (S. cerevisiae)                  | 209018 | 0.23  | 0.33  | 0.35  | 0.66 | -0.90 *  |
| Ccdc72        | coiled-coil domain containing 72                                    | 66167  | 7.11  | 6.95  | 6.90  | 1.03 | 0.52 ns  |
| Sertad2       | SERTA domain containing 2                                           | 58172  | 1.34  | 1.55  | 1.45  | 0.92 | -0.60 ns |
| Utp18         | UTP18, small subunit (SSU) processome component, homolog (yeast)    | 217109 | 1.03  | 0.98  | 1.28  | 0.80 | -0.87 *  |
| Gmeb2         | glucocorticoid modulatory element binding protein 2                 | 229004 | 0.65  | 0.61  | 0.63  | 1.03 | -0.05 ns |
| 1110014N23Rik | RIKEN cDNA 1110014N23 gene                                          | 68505  | 0.83  | 0.78  | 0.53  | 1.55 | 0.76 ns  |
| Zbtb11        | zinc finger and BTB domain containing 11                            | 271377 | 0.92  | 1.00  | 1.29  | 0.71 | -0.90 *  |
| Rundc1        | RUN domain containing 1                                             | 217201 | 0.45  | 0.46  | 0.45  | 1.00 | 0.47 ns  |
| Foxn2         | forkhead box N2                                                     | 14236  | 0.27  | 0.37  | 0.26  | 1.01 | 0.11 ns  |
| Tmem18        | transmembrane protein 18                                            | 211986 | 0.97  | 1.26  | 0.91  | 1.07 | 0.47 ns  |
| Cln6          | ceroid-lipofuscinosis, neuronal 6                                   | 76524  | 1.21  | 0.96  | 1.13  | 1.07 | 0.49 ns  |
| Mccc2         | methylcrotonoyl-Coenzyme A carboxylase 2 (beta)                     | 78038  | 0.46  | 0.46  | 0.37  | 1.25 | -0.08 ns |
| Prps2         | phosphoribosyl pyrophosphate synthetase 2                           | 110639 | 3.03  | 3.45  | 3.05  | 0.99 | 0.43 ns  |
| Nr2c2         | nuclear receptor subfamily 2, group C, member 2                     | 22026  | 2.15  | 1.76  | 1.91  | 1.12 | 0.63 ns  |
| AI987944      |                                                                     | 233168 | 0.54  | 0.42  | 0.45  | 1.19 | 0.26 ns  |
| AW146154      |                                                                     | 101835 | 0.54  | 0.42  | 0.45  | 1.19 | 0.26 ns  |
| Rnf122        | ring finger protein 122                                             | 68867  | 0.35  | 0.40  | 0.37  | 0.93 | 0.31 ns  |
| Rpl23         | ribosomal protein L23                                               | 65019  | 35.90 | 32.48 | 26.67 | 1.34 | 0.97 **  |

|               |                                                                                     |        |       |       |       |      |          |
|---------------|-------------------------------------------------------------------------------------|--------|-------|-------|-------|------|----------|
| Txlna         | taxilin alpha                                                                       | 109658 | 0.64  | 0.64  | 0.70  | 0.90 | -0.56 ns |
| Phldb2        | pleckstrin homology-like domain, family B, member 2                                 | 208177 | 3.80  | 3.38  | 4.77  | 0.79 | -0.30 ns |
| Btbdb7        | BTB (POZ) domain containing 7                                                       | 238386 | 2.36  | 2.23  | 2.68  | 0.88 | -0.61 ns |
| Sertad4       | SERTA domain containing 4                                                           | 214791 | 1.08  | 0.98  | 0.78  | 1.38 | 0.43 ns  |
| 1700052N19Rik | RIKEN cDNA 1700052N19 gene                                                          | 73419  | 0.36  | 0.43  | 0.38  | 0.94 | -0.15 ns |
| Bmf           | Bcl2 modifying factor                                                               | 171543 | 0.47  | 0.53  | 0.35  | 1.33 | 0.42 ns  |
| Upk3b         | uroplakin 3B                                                                        | 100647 | 2.11  | 1.40  | 0.60  | 3.50 | 0.63 ns  |
| Pak2          | p21 (CDKN1A)-activated kinase 2                                                     | 224105 | 2.05  | 1.78  | 1.86  | 1.10 | 0.40 ns  |
| Pfdn4         | prefoldin 4                                                                         | 109054 | 1.89  | 1.71  | 1.80  | 1.05 | 0.00 ns  |
| Amot          | angiominin                                                                          | 27494  | 1.07  | 1.08  | 1.22  | 0.87 | 0.20 ns  |
| Pitpnb        | phosphatidylinositol transfer protein, beta                                         | 56305  | 2.88  | 2.89  | 3.20  | 0.90 | -0.41 ns |
| Smurf2        | SMAD specific E3 ubiquitin protein ligase 2                                         | 66313  | 1.46  | 1.26  | 1.39  | 1.05 | 0.56 ns  |
| Rbpj          | recombination signal binding protein for immunoglobulin kappa J region              | 19664  | 1.09  | 1.29  | 1.97  | 0.55 | -0.82 *  |
| Ngfr          | nerve growth factor receptor (TNFR superfamily, member 16)                          | 18053  | 0.40  | 0.38  | 0.53  | 0.75 | -0.67 ns |
| Ibtk          | inhibitor of Bruton agammaglobulinemia tyrosine kinase                              | 108837 | 0.35  | 0.38  | 0.41  | 0.83 | -0.03 ns |
| 2610101N10Rik | RIKEN cDNA 2610101N10 gene                                                          | 67958  | 1.97  | 1.94  | 2.19  | 0.90 | 0.06 ns  |
| Rab3gap2      | RAB3 GTPase activating protein subunit 2                                            | 98732  | 0.62  | 0.60  | 0.52  | 1.17 | -0.04 ns |
| Arfp1         | ADP-ribosylation factor interacting protein 1                                       | 99889  | 3.49  | 3.46  | 2.97  | 1.17 | 0.31 ns  |
| Alg10b        | asparagine-linked glycosylation 10 homolog B (yeast, alpha-1,2-glucosyltransferase) | 380959 | 1.65  | 1.61  | 1.49  | 1.11 | 0.43 ns  |
| Agps          | alkylglycerone phosphate synthase                                                   | 228061 | 0.73  | 0.89  | 0.66  | 1.09 | -0.13 ns |
| Uhrf2         | ubiquitin-like, containing PHD and RING finger domains 2                            | 109113 | 0.71  | 0.80  | 0.46  | 1.54 | 0.64 ns  |
| Gm561         | gene model 561, (NCBI)                                                              | 228715 | 0.51  | 0.51  | 0.53  | 0.96 | 0.12 ns  |
| Zfp41         | zinc finger protein 41                                                              | 22701  | 0.40  | 0.32  | 0.41  | 0.99 | 0.09 ns  |
| Safb          | scaffold attachment factor B                                                        | 224903 | 1.19  | 1.00  | 0.92  | 1.28 | 0.61 ns  |
| Tbcel         | tubulin folding cofactor E-like                                                     | 272589 | 0.55  | 0.62  | 0.36  | 1.55 | 0.74 ns  |
| Ppm1f         | protein phosphatase 1F (PP2C domain containing)                                     | 68606  | 0.30  | 0.33  | 0.42  | 0.71 | -0.91 *  |
| D930001I22Rik | RIKEN cDNA D930001I22 gene                                                          | 228859 | 0.40  | 0.43  | 0.34  | 1.14 | 0.61 ns  |
| B630005N14Rik | RIKEN cDNA B630005N14 gene                                                          | 101148 | 1.17  | 1.41  | 1.79  | 0.65 | -0.89 *  |
| Hic2          | hypermethylated in cancer 2                                                         | 58180  | 0.33  | 0.30  | 0.41  | 0.81 | -0.38 ns |
| Ncapd3        | non-SMC condensin II complex, subunit D3                                            | 78658  | 1.45  | 1.40  | 1.75  | 0.83 | 0.11 ns  |
| Ipo7          | importin 7                                                                          | 233726 | 3.10  | 3.09  | 4.24  | 0.73 | -0.70 ns |
| Rps6kb1       | ribosomal protein S6 kinase, polypeptide 1                                          | 72508  | 0.60  | 0.58  | 0.66  | 0.91 | -0.73 ns |
| Nob1          | NIN1/RPN12 binding protein 1 homolog (S. cerevisiae)                                | 67619  | 0.53  | 0.55  | 0.39  | 1.35 | 0.29 ns  |
| Gsk3b         | glycogen synthase kinase 3 beta                                                     | 56637  | 4.19  | 3.64  | 3.79  | 1.10 | -0.22 ns |
| Smad3         | MAD homolog 3 (Drosophila)                                                          | 17127  | 1.65  | 1.13  | 1.13  | 1.46 | 0.86 *   |
| Synj1         | synaptojanin 1                                                                      | 104015 | 0.94  | 0.75  | 0.87  | 1.07 | 0.19 ns  |
| E430028B21Rik | RIKEN cDNA E430028B21 gene                                                          | 211948 | 0.76  | 0.83  | 0.83  | 0.92 | -0.73 ns |
| Tsc22d1       | TSC22 domain family, member 1                                                       | 21807  | 16.85 | 16.47 | 12.36 | 1.36 | 0.46 ns  |
| Atf7ip        | activating transcription factor 7 interacting protein                               | 54343  | 0.59  | 0.58  | 0.61  | 0.97 | -0.18 ns |
| Ttyh3         | tweety homolog 3 (Drosophila)                                                       | 78339  | 0.29  | 0.34  | 0.38  | 0.76 | -0.62 ns |
| Diap1         |                                                                                     | 13367  | 1.46  | 1.50  | 1.62  | 0.89 | 0.16 ns  |
| 4930402E16Rik | RIKEN cDNA 4930402E16 gene                                                          | 319518 | 0.58  | 0.58  | 0.40  | 1.46 | 0.69 ns  |
| D4Erd22e      | DNA segment, Chr 4, ERATO Doi 22, expressed                                         | 213491 | 0.73  | 0.64  | 0.68  | 1.07 | 0.59 ns  |
| Arfgef2       |                                                                                     | 99371  | 0.65  | 0.63  | 0.60  | 1.08 | -0.08 ns |
| H2-Ke6        | H2-K region expressed gene 6                                                        | 14979  | 0.38  | 0.35  | 0.22  | 1.73 | 0.29 ns  |
| Rab22a        | RAB22A, member RAS oncogene family                                                  | 19334  | 1.20  | 0.98  | 1.03  | 1.15 | -0.03 ns |
| Cspp1         | centrosome and spindle pole associated protein 1                                    | 211660 | 1.03  | 0.99  | 0.81  | 1.27 | 0.11 ns  |
| Slc7a1        | solute carrier family 7 (cationic amino acid transporter, y+ system), member 1      | 11987  | 9.18  | 8.80  | 6.02  | 1.52 | 0.53 ns  |
| Hsd1          | hydroxysteroid dehydrogenase like 1                                                 | 72552  | 0.75  | 0.77  | 0.51  | 1.47 | 0.65 ns  |
| Msrb3         | methionine sulfoxide reductase B3                                                   | 320183 | 0.74  | 0.65  | 0.14  | 5.09 | 0.65 ns  |
| 1200011118Rik | RIKEN cDNA 1200011118 gene                                                          | 67467  | 0.82  | 0.73  | 0.71  | 1.14 | 0.51 ns  |
| Thap1         | THAP domain containing, apoptosis associated protein 1                              | 73754  | 0.50  | 0.60  | 0.54  | 0.91 | 0.20 ns  |
| 2310016M24Rik | RIKEN cDNA 2310016M24 gene                                                          | 66379  | 2.10  | 2.06  | 2.21  | 0.94 | -0.27 ns |
| Gpi2          | glutamic pyruvate transaminase (alanine aminotransferase) 2                         | 108682 | 0.43  | 0.51  | 0.36  | 1.18 | 0.41 ns  |
| Gna12         | guanine nucleotide binding protein, alpha 12                                        | 14673  | 0.44  | 0.39  | 0.43  | 1.03 | 0.42 ns  |
| Cpd           | carboxypeptidase D                                                                  | 12874  | 1.67  | 1.61  | 1.64  | 1.02 | -0.30 ns |
| 1500012F01Rik | RIKEN cDNA 1500012F01 gene                                                          | 68949  | 5.25  | 5.76  | 4.51  | 1.16 | -0.36 ns |
| Trim37        | tripartite motif protein 37                                                         | 68729  | 1.58  | 1.61  | 1.47  | 1.07 | 0.37 ns  |
| Lmtk2         | lemur tyrosine kinase 2                                                             | 231876 | 1.18  | 1.15  | 1.20  | 0.98 | -0.64 ns |
| Ckap4         | cytoskeleton-associated protein 4                                                   | 216197 | 0.42  | 1.06  | 1.07  | 0.39 | -0.74 ns |
| Snx25         | sorting nexin 25                                                                    | 102141 | 0.36  | 0.28  | 0.40  | 0.90 | -0.02 ns |
| Gabbr1        | gamma-aminobutyric acid (GABA-B) receptor, 1                                        | 54393  | 0.33  | 0.24  | 0.16  | 2.08 | 0.58 ns  |
| Strn          | striatin, calmodulin binding protein                                                | 268980 | 0.97  | 0.83  | 0.71  | 1.36 | 0.72 ns  |
| Tlk1          | tousled-like kinase 1                                                               | 228012 | 1.79  | 1.80  | 1.40  | 1.28 | 0.18 ns  |
| Kif21a        | kinesin family member 21A                                                           | 16564  | 0.04  | 0.18  | 0.47  | 0.08 | -0.94 ** |
| Ptpnj         | protein tyrosine phosphatase, receptor type, J                                      | 19271  | 1.17  | 1.05  | 0.78  | 1.49 | 0.18 ns  |
| Cdc216        | cell division cycle 2-like 6 (CDK8-like)                                            | 78334  | 2.03  | 1.89  | 1.65  | 1.22 | 0.63 ns  |
| Ccnyl1        | cyclin Y-like 1                                                                     | 227210 | 0.71  | 0.57  | 0.38  | 1.84 | 0.18 ns  |
| Nr4a2         | Nuclear receptor subfamily 4, group A, member 2                                     | 18227  | 0.22  | 0.27  | 0.26  | 0.83 | -0.57 ns |
| Nol5a         | nucleolar protein 5A                                                                | 67134  | 2.64  | 3.04  | 2.71  | 0.97 | -0.34 ns |
| LOC675851     |                                                                                     | 675851 | 4.35  | 4.29  | 4.89  | 0.89 | -0.44 ns |
| Ndufc2        |                                                                                     | 68197  | 4.35  | 4.29  | 4.89  | 0.89 | -0.44 ns |
| Tbl1x         | Transducin (beta)-like 1 X-linked                                                   | 21372  | 2.77  | 2.67  | 3.69  | 0.75 | -0.71 ns |
| Pogz          | pogo transposable element with ZNF domain                                           | 229584 | 1.23  | 1.36  | 1.09  | 1.13 | -0.34 ns |
| Igsf3         | immunoglobulin superfamily, member 3                                                | 78908  | 0.15  | 0.43  | 0.53  | 0.27 | -0.77 ns |
| 2410129H14Rik | RIKEN cDNA 2410129H14 gene                                                          | 76789  | 2.50  | 2.31  | 3.02  | 0.82 | -0.32 ns |
| Dcun1d1       |                                                                                     | 114893 | 1.00  | 0.94  | 1.04  | 0.95 | -0.60 ns |
| Lmo7          | LIM domain only 7                                                                   | 380928 | 1.27  | 1.41  | 1.86  | 0.68 | -0.89 *  |
| Mia3          | melanoma inhibitory activity 3                                                      | 338366 | 1.27  | 1.48  | 0.97  | 1.31 | 0.67 ns  |
| Dcp2          | DCP2 decapping enzyme homolog (S. cerevisiae)                                       | 70640  | 0.90  | 1.07  | 1.11  | 0.80 | -0.01 ns |
| Cep350        | centrosomal protein 350                                                             | 74081  | 1.10  | 1.01  | 1.10  | 1.00 | -0.36 ns |
| Dcun1d4       | DCN1, defective in cullin neddylation 1, domain containing 4 (S. cerevisiae)        | 100737 | 0.32  | 0.32  | 0.44  | 0.71 | -0.25 ns |
| Cblb          | Casitas B-lineage lymphoma b                                                        | 208650 | 1.13  | 0.66  | 0.97  | 1.17 | -0.10 ns |
| Atp11c        | ATPase, class VI, type 11C                                                          | 320940 | 0.39  | 0.42  | 0.62  | 0.62 | -0.42 ns |
| Shmt2         | serine hydroxymethyltransferase 2 (mitochondrial)                                   | 108037 | 1.75  | 2.35  | 1.89  | 0.92 | -0.43 ns |



|               |                                                                                                   |        |       |       |       |       |          |
|---------------|---------------------------------------------------------------------------------------------------|--------|-------|-------|-------|-------|----------|
| Gng12         | guanine nucleotide binding protein (G protein), gamma 12                                          | 14701  | 2.10  | 1.63  | 1.91  | 1.09  | 0.12 ns  |
| Ddx46         | DEAD (Asp-Glu-Ala-Asp) box polypeptide 46                                                         | 212880 | 1.10  | 1.22  | 1.20  | 0.91  | 0.07 ns  |
| Srpk1         | serine/arginine-rich protein specific kinase 1                                                    | 20815  | 1.54  | 1.52  | 0.98  | 1.57  | 0.80 ns  |
| Gabpb2        | GA repeat binding protein, beta 2                                                                 | 213054 | 1.72  | 1.79  | 1.47  | 1.16  | 0.31 ns  |
| Yipf6         | Yip1 domain family, member 6                                                                      | 77929  | 0.34  | 0.35  | 0.49  | 0.70  | -0.87 *  |
| 2310028O11Rik | RIKEN cDNA 2310028O11 gene                                                                        | 433771 | 3.07  | 3.01  | 3.56  | 0.86  | -0.35 ns |
| Mthd          | Metadherin                                                                                        | 67154  | 2.06  | 2.29  | 2.19  | 0.94  | 0.10 ns  |
| Spty2d1       | SPT2, Suppressor of Ty, domain containing 1 (S. cerevisiae)                                       | 101685 | 0.31  | 0.45  | 0.51  | 0.61  | -0.87 *  |
| Opa3          | optic atrophy 3 (human)                                                                           | 403187 | 0.52  | 0.66  | 0.53  | 0.98  | 0.33 ns  |
| D730040F13Rik | RIKEN cDNA D730040F13 gene                                                                        | 242474 | 0.52  | 0.54  | 0.73  | 0.71  | -0.70 ns |
| 2610014I16Rik | RIKEN cDNA 2610014I16 gene                                                                        | 66300  | 0.28  | 0.26  | 0.37  | 0.77  | -0.18 ns |
| Cfl1          | cofilin 1, non-muscle                                                                             | 12631  | 18.49 | 17.56 | 14.66 | 1.26  | 0.90 *   |
| Pitpnm3       | PITPNM family member 3                                                                            | 327958 | 0.37  | 0.36  | 0.28  | 1.31  | 0.22 ns  |
| Socs4         | suppressor of cytokine signaling 4                                                                | 67296  | 1.60  | 1.46  | 1.84  | 0.86  | -0.64 ns |
| Nlgn2         | neuroligin 2                                                                                      | 216856 | 0.50  | 0.72  | 0.94  | 0.53  | -0.70 ns |
| Pcdh19        | protocadherin 19                                                                                  | 279653 | 0.33  | 0.18  | 0.02  | 14.90 | 0.43 ns  |
| Sh3f1         | SH3 domain containing ring finger 1                                                               | 59009  | 0.87  | 0.87  | 1.41  | 0.62  | -0.73 ns |
| AI462493      | expressed sequence AI462493                                                                       | 107197 | 0.70  | 0.79  | 0.53  | 1.33  | 0.46 ns  |
| Lsm14b        | LSM14 homolog B (SCD6, S. cerevisiae)                                                             | 241846 | 0.88  | 0.89  | 0.88  | 1.00  | -0.19 ns |
| BC039210      | cDNA sequence BC039210                                                                            | 234839 | 0.93  | 1.13  | 0.80  | 1.15  | 0.44 ns  |
| Itga3         | integrin alpha 3                                                                                  | 16400  | 2.87  | 2.84  | 2.61  | 1.09  | -0.02 ns |
| App1          | adaptor protein, phosphotyrosine interaction, PH domain and leucine zipper containing 1           | 72993  | 0.81  | 0.76  | 0.76  | 1.06  | 0.49 ns  |
| Arl5b         | ADP-ribosylation factor-like 5B                                                                   | 75869  | 0.65  | 0.73  | 0.60  | 1.08  | 0.37 ns  |
| Gnb21         | guanine nucleotide binding protein (G protein), beta polypeptide 2 like 1                         | 14694  | 19.91 | 18.13 | 15.72 | 1.26  | 0.79 ns  |
| Rab11fip2     | RAB11 family interacting protein 2 (class I)                                                      | 74998  | 0.60  | 0.70  | 0.53  | 1.13  | 0.22 ns  |
| Rps19bp1      | ribosomal protein S19 binding protein 1                                                           | 66538  | 0.89  | 1.08  | 1.06  | 0.83  | -0.37 ns |
| Phf13         | PHD finger protein 13                                                                             | 230936 | 0.45  | 0.43  | 0.50  | 0.90  | 0.15 ns  |
| Mpp7          | membrane protein, palmitoylated 7 (MAGUK p55 subfamily member 7)                                  | 75739  | 0.61  | 0.53  | 0.50  | 1.21  | -0.09 ns |
| Mobk1a        | MOB1, Mps One Binder kinase activator-like 1A (yeast)                                             | 68473  | 1.20  | 1.23  | 1.27  | 0.94  | -0.37 ns |
| Pip5k1b       | Phosphatidylinositol-4-phosphate 5-kinase, type 1 beta                                            | 18719  | 0.88  | 0.88  | 0.81  | 1.07  | -0.38 ns |
| AA987161      | expressed sequence AA987161                                                                       | 380856 | 0.29  | 0.34  | 0.40  | 0.72  | -0.55 ns |
| Pak6          | p21 (CDKN1A)-activated kinase 6                                                                   | 214230 | 0.64  | 0.58  | 0.38  | 1.70  | 0.85 *   |
| Usp19         | ubiquitin specific peptidase 19                                                                   | 71472  | 0.61  | 0.73  | 0.60  | 1.00  | 0.40 ns  |
| Timm13        | translocase of inner mitochondrial membrane 13 homolog (yeast)                                    | 30055  | 3.03  | 3.02  | 2.79  | 1.08  | 0.52 ns  |
| Wdr24         | WD repeat domain 24                                                                               | 268933 | 0.57  | 0.49  | 0.37  | 1.52  | 0.85 *   |
| Lrig2         | leucine-rich repeats and immunoglobulin-like domains 2                                            | 269473 | 0.58  | 0.60  | 0.45  | 1.29  | 0.29 ns  |
| 6330503K22Rik | RIKEN cDNA 6330503K22 gene                                                                        | 101565 | 0.72  | 0.73  | 0.91  | 0.79  | -0.21 ns |
| Frat2         | frequently rearranged in advanced T-cell lymphomas 2                                              | 212398 | 0.37  | 0.42  | 0.39  | 0.93  | -0.24 ns |
| Ubp1          | upstream binding protein 1                                                                        | 22221  | 1.47  | 1.62  | 1.45  | 1.01  | 0.56 ns  |
| Aadacl1       | arylacetamide deacetylase-like 1                                                                  | 320024 | 1.35  | 1.13  | 0.58  | 2.30  | 0.03 ns  |
| Usp36         | ubiquitin specific peptidase 36                                                                   | 72344  | 0.51  | 0.48  | 0.46  | 1.10  | 0.50 ns  |
| Daam1         | dishevelled associated activator of morphogenesis 1                                               | 208846 | 1.25  | 1.37  | 1.83  | 0.68  | -0.94 ** |
| Rpl13         | ribosomal protein L13                                                                             | 270106 | 23.05 | 22.37 | 16.34 | 1.40  | 0.73 ns  |
| Smarcc1       | SWI/SNF related, matrix associated, actin dependent regulator of chromatin, subfamily c, member 1 | 20588  | 2.22  | 2.30  | 1.92  | 1.15  | 0.79 ns  |
| Ccdc127       | coiled-coil domain containing 127                                                                 | 67433  | 0.36  | 0.46  | 0.47  | 0.76  | -0.29 ns |
| Tsc1          | tuberous sclerosis 1                                                                              | 64930  | 0.48  | 0.45  | 0.48  | 1.00  | -0.37 ns |
| Zbtb6         | zinc finger and BTB domain containing 6                                                           | 241322 | 0.72  | 0.63  | 0.39  | 1.86  | 0.87 *   |
| Btbd1         | BTB (POZ) domain containing 1                                                                     | 83962  | 1.74  | 1.74  | 1.72  | 1.00  | 0.18 ns  |
| Rfxap         | regulatory factor X-associated protein                                                            | 170767 | 0.43  | 0.39  | 0.46  | 0.92  | -0.03 ns |
| BC037112      | cDNA sequence BC037112                                                                            | 231128 | 0.51  | 0.48  | 0.44  | 1.13  | 0.49 ns  |
| Dgcr8         | DiGeorge syndrome critical region gene 8                                                          | 94223  | 1.17  | 1.26  | 1.16  | 1.01  | 0.30 ns  |
| Phc3          | polyhomeotic-like 3 (Drosophila)                                                                  | 241915 | 1.58  | 1.39  | 1.22  | 1.29  | 0.52 ns  |
| Lpp           | LIM domain containing preferred translocation partner in lipoma                                   | 210126 | 4.85  | 4.56  | 4.12  | 1.17  | 0.61 ns  |
| Trp53i13      | transformation related protein 53 inducible protein 13                                            | 216964 | 0.33  | 0.29  | 0.29  | 1.15  | 0.67 ns  |
| Epc2          | enhancer of polycomb homolog 2 (Drosophila)                                                       | 227867 | 1.61  | 1.56  | 1.12  | 1.44  | 0.35 ns  |
| Ttc21b        | tetratricopeptide repeat domain 21B                                                               | 73668  | 0.56  | 0.50  | 0.30  | 1.88  | 0.75 ns  |
| Rbak          | RB-associated KRAB repressor                                                                      | 57782  | 0.49  | 0.52  | 0.49  | 0.99  | 0.26 ns  |
| Plcx2         | phosphatidylinositol-specific phospholipase C, X domain containing 2                              | 433022 | 0.42  | 0.50  | 0.52  | 0.80  | -0.72 ns |
| Nol9          | nucleolar protein 9                                                                               | 74035  | 0.24  | 0.27  | 0.36  | 0.66  | -0.54 ns |
| Tns3          | tensin 3                                                                                          | 319939 | 3.28  | 2.43  | 2.70  | 1.21  | 0.34 ns  |
| D330038O06Rik | RIKEN cDNA D330038O06 gene                                                                        | 330788 | 0.43  | 0.40  | 0.38  | 1.11  | 0.62 ns  |
| Thap2         | THAP domain containing, apoptosis associated protein 2                                            | 66816  | 0.53  | 0.60  | 0.34  | 1.54  | 0.18 ns  |
| Fgd4          | FYVE, RhoGEF and PH domain containing 4                                                           | 224014 | 0.95  | 0.90  | 0.64  | 1.48  | 0.62 ns  |
| Fkbp15        | FK506 binding protein 15                                                                          | 338355 | 0.48  | 0.44  | 0.37  | 1.27  | 0.98 *** |
| Phf15         | PHD finger protein 15                                                                             | 76901  | 0.72  | 0.81  | 0.57  | 1.25  | 0.71 ns  |
| Tmem62        | transmembrane protein 62                                                                          | 96957  | 0.63  | 0.50  | 0.42  | 1.50  | 0.85 *   |
| Tmcc1         | transmembrane and coiled coil domains 1                                                           | 330401 | 0.42  | 0.46  | 0.42  | 1.00  | -0.42 ns |
| Wdr22         | WD repeat domain 22                                                                               | 320808 | 0.27  | 0.40  | 0.44  | 0.63  | -0.75 ns |
| Camsap1       | calmodulin regulated spectrin-associated protein 1                                                | 227634 | 0.68  | 0.66  | 0.58  | 1.16  | 0.55 ns  |
| Ptpn14        | protein tyrosine phosphatase, non-receptor type 14                                                | 19250  | 5.28  | 4.87  | 2.70  | 1.94  | 0.36 ns  |
| 4921513D23Rik | RIKEN cDNA 4921513D23 gene                                                                        | 223989 | 0.80  | 0.82  | 0.82  | 0.97  | 0.03 ns  |
| Nufip2        | nuclear fragile X mental retardation protein interacting protein 2                                | 68564  | 1.52  | 1.62  | 1.18  | 1.29  | -0.25 ns |
| Alkbh6        |                                                                                                   | 233065 | 0.60  | 0.69  | 0.85  | 0.71  | -0.70 ns |
| Clip3         |                                                                                                   | 76686  | 0.60  | 0.69  | 0.85  | 0.71  | -0.70 ns |
| Rad23a        | RAD23a homolog (S. cerevisiae)                                                                    | 19358  | 1.63  | 1.68  | 2.23  | 0.73  | -0.29 ns |
| Oxsm          | 3-oxoacyl-ACP synthase, mitochondrial                                                             | 71147  | 0.22  | 0.16  | 0.37  | 0.60  | -0.60 ns |
| Atp8b1        | ATPase, class I, type 8B, member 1                                                                | 54670  | 0.69  | 0.80  | 0.90  | 0.76  | -0.17 ns |
| Lrrc8c        | leucine rich repeat containing 8 family, member C                                                 | 100604 | 0.46  | 0.50  | 0.35  | 1.32  | 0.51 ns  |
| Cnksr1        |                                                                                                   | 194231 | 0.39  | 0.60  | 0.59  | 0.66  | -0.68 ns |
| Socs7         | suppressor of cytokine signaling 7                                                                | 192157 | 0.81  | 0.84  | 1.10  | 0.74  | -0.78 ns |
| Manea         | mannosidase, endo-alpha                                                                           | 242362 | 0.56  | 0.51  | 0.52  | 1.07  | 0.39 ns  |
| Kcnj11        | potassium inwardly rectifying channel, subfamily J, member 11                                     | 16514  | 0.71  | 0.84  | 1.38  | 0.51  | -0.76 ns |
| AI450540      | expressed sequence AI450540                                                                       | 226252 | 0.56  | 0.54  | 0.50  | 1.11  | 0.61 ns  |
| Prr8          | proline rich 8                                                                                    | 381626 | 0.76  | 0.75  | 0.82  | 0.92  | 0.05 ns  |

|               |                                                                                                                  |        |       |       |       |      |          |
|---------------|------------------------------------------------------------------------------------------------------------------|--------|-------|-------|-------|------|----------|
| Ktn1          | kinectin 1                                                                                                       | 16709  | 2.01  | 2.11  | 2.52  | 0.79 | -0.91 *  |
| Chdh          | Choline dehydrogenase                                                                                            | 218865 | 2.46  | 1.95  | 1.69  | 1.45 | 0.74 ns  |
| BC033915      | cDNA sequence BC033915                                                                                           | 70661  | 1.13  | 0.91  | 0.78  | 1.44 | 0.93 **  |
| Lgals1        | lectin, galactose binding, soluble 1                                                                             | 16852  | 13.53 | 13.96 | 10.97 | 1.23 | 0.66 ns  |
| Ptpn3         | Protein tyrosine phosphatase, non-receptor type 3                                                                | 545622 | 1.09  | 1.16  | 1.29  | 0.85 | -0.74 ns |
| Akr1c19       | aldo-keto reductase family 1, member C19                                                                         | 432720 | 2.11  | 1.43  | 1.02  | 2.06 | 0.47 ns  |
| Glt28d2       | glycosyltransferase 28 domain containing 2                                                                       | 320302 | 0.68  | 0.62  | 0.37  | 1.84 | 0.73 ns  |
| Timm50        | translocase of inner mitochondrial membrane 50 homolog (yeast)                                                   | 66525  | 0.66  | 0.89  | 1.02  | 0.64 | -0.71 ns |
| Prdm15        | PR domain containing 15                                                                                          | 114604 | 0.33  | 0.37  | 0.40  | 0.83 | -0.86 *  |
| Lasp1         | LIM and SH3 protein 1                                                                                            | 16796  | 6.28  | 6.22  | 7.59  | 0.82 | -0.66 ns |
| Gse1          | genetic suppressor element 1                                                                                     | 382034 | 0.81  | 0.81  | 0.73  | 1.11 | 0.50 ns  |
| Ppfia1        | protein tyrosine phosphatase, receptor type, f polypeptide (PTPRF), interacting protein, alpha 1                 | 233977 | 0.41  | 0.36  | 0.53  | 0.76 | -0.78 ns |
| Ube2d3        | ubiquitin-conjugating enzyme E2D 3 (UBC4/5 homolog, yeast)                                                       | 66105  | 11.32 | 10.31 | 8.91  | 1.26 | 0.53 ns  |
| Ids           | iduronate 2-sulfatase                                                                                            | 15931  | 1.79  | 1.43  | 1.93  | 0.92 | -0.06 ns |
| Rpl13a        | ribosomal protein L13a                                                                                           | 22121  | 22.13 | 20.90 | 17.59 | 1.25 | 0.69 ns  |
| Mfsd11        | major facilitator superfamily domain containing 11                                                               | 69900  | 0.57  | 0.67  | 0.69  | 0.83 | -0.21 ns |
| 6230416J20Rik | RIKEN cDNA 6230416J20 gene                                                                                       | 230376 | 0.47  | 0.59  | 0.69  | 0.68 | -0.65 ns |
| Abi2          | v-abl Abelson murine leukemia viral oncogene 2 (arg, Abelson-related gene)                                       | 11352  | 0.80  | 0.61  | 0.58  | 1.38 | 0.57 ns  |
| Pfas          | phosphoribosylformylglycinamide synthase (FGAR amidotransferase)                                                 | 237823 | 1.00  | 1.04  | 1.08  | 0.92 | -0.35 ns |
| Madd          | MAP-kinase activating death domain                                                                               | 228355 | 0.44  | 0.24  | 0.30  | 1.45 | 0.40 ns  |
| A530082C11Rik | RIKEN cDNA A530082C11 gene                                                                                       | 320541 | 0.50  | 0.64  | 0.60  | 0.83 | -0.18 ns |
| Taf1          | TAF1 RNA polymerase II, TATA box binding protein (TBP)-associated factor                                         | 270627 | 0.85  | 0.73  | 1.22  | 0.69 | -0.55 ns |
| 2810046L04Rik | RIKEN cDNA 2810046L04 gene                                                                                       | 212127 | 0.53  | 0.41  | 0.49  | 1.07 | -0.25 ns |
| Osbp11        | oxysterol binding protein-like 11                                                                                | 106326 | 1.09  | 1.22  | 1.37  | 0.79 | -0.71 ns |
| Zranb3        | zinc finger, RAN-binding domain containing 3                                                                     | 226409 | 0.65  | 0.61  | 0.48  | 1.36 | 0.96 **  |
| Sf3a2         | splicing factor 3a, subunit 2                                                                                    | 20222  | 4.65  | 3.92  | 3.47  | 1.33 | 0.64 ns  |
| Zc3h7b        | zinc finger CCCH type containing 7B                                                                              | 20286  | 0.75  | 0.78  | 0.88  | 0.85 | -0.55 ns |
| Sestd1        | SEC14 and spectrin domains 1                                                                                     | 228071 | 3.27  | 2.64  | 2.10  | 1.55 | 0.26 ns  |
| Serinc3       | serine incorporator 3                                                                                            | 26943  | 5.34  | 5.85  | 5.66  | 0.94 | -0.39 ns |
| Notch2        | Notch gene homolog 2 (Drosophila)                                                                                | 18129  | 2.94  | 3.07  | 2.14  | 1.36 | 0.38 ns  |
| Sox12         | SRY-box containing gene 12                                                                                       | 20667  | 0.31  | 0.49  | 0.35  | 0.88 | -0.01 ns |
| Ddx49         | DEAD (Asp-Glu-Ala-Asp) box polypeptide 49                                                                        | 234374 | 0.94  | 1.10  | 1.21  | 0.77 | -0.72 ns |
| Bcr           | breakpoint cluster region homolog                                                                                | 110279 | 0.57  | 0.61  | 0.52  | 1.09 | -0.25 ns |
| Calm1         | calmodulin 1                                                                                                     | 12313  | 8.41  | 10.20 | 10.05 | 0.83 | -0.68 ns |
| Rps18         | ribosomal protein S18                                                                                            | 20084  | 25.50 | 23.58 | 15.79 | 1.61 | 0.83 *   |
| Smg7          | Smg-7 homolog, nonsense mediated mRNA decay factor (C. elegans)                                                  | 226517 | 0.97  | 0.89  | 1.02  | 0.95 | -0.45 ns |
| Ccl28         | Chemokine (C-C motif) ligand 28                                                                                  | 56838  | 0.14  | 0.13  | 0.48  | 0.29 | -0.77 ns |
| Rpl41         | ribosomal protein L41                                                                                            | 67945  | 30.86 | 26.85 | 21.75 | 1.41 | 0.86 *   |
| Usp6nl        | USP6 N-terminal like                                                                                             | 98910  | 1.41  | 1.21  | 0.92  | 1.52 | 0.82 *   |
| Rnf168        | ring finger protein 168                                                                                          | 70238  | 1.63  | 1.56  | 2.22  | 0.73 | -0.60 ns |
| Lymr4         | LYR motif containing 4                                                                                           | 380840 | 0.54  | 0.37  | 0.40  | 1.36 | 0.69 ns  |
| Map3k2        | Mitogen activated protein kinase kinase kinase 2                                                                 | 26405  | 0.86  | 0.77  | 0.71  | 1.20 | 0.46 ns  |
| Usp30         | ubiquitin specific peptidase 30                                                                                  | 100756 | 0.37  | 0.29  | 0.36  | 1.00 | -0.42 ns |
| 1110028C15Rik | RIKEN cDNA 1110028C15 gene                                                                                       | 68691  | 0.44  | 0.49  | 0.57  | 0.76 | -0.86 *  |
| Fzd5          | frizzled homolog 5 (Drosophila)                                                                                  | 14367  | 0.48  | 0.39  | 0.30  | 1.62 | -0.07 ns |
| Rufy3         | RUN and FYVE domain containing 3                                                                                 | 52822  | 0.32  | 0.35  | 0.47  | 0.68 | -0.92 ** |
| Sclt1         | sodium channel and clathrin linker 1                                                                             | 67161  | 0.58  | 0.65  | 0.59  | 0.98 | -0.25 ns |
| Tspan33       | tetraspanin 33                                                                                                   | 232670 | 3.81  | 3.10  | 3.21  | 1.18 | -0.06 ns |
| Hoxa9         | homeo box A9                                                                                                     | 15405  | 1.78  | 1.55  | 2.36  | 0.75 | -0.62 ns |
| Dnalc1        | dynein, axonemal, light chain 1                                                                                  | 105000 | 0.61  | 0.67  | 0.66  | 0.92 | -0.68 ns |
| Zfp647        | zinc finger protein 647                                                                                          | 239546 | 0.22  | 0.24  | 0.46  | 0.46 | -0.81 ns |
| Tsr1          | TSR1, 20S rRNA accumulation, homolog (yeast)                                                                     | 104662 | 1.69  | 2.07  | 1.50  | 1.12 | 0.09 ns  |
| Tardbp        | TAR DNA binding protein                                                                                          | 230908 | 2.29  | 2.34  | 2.64  | 0.86 | -0.86 *  |
| LOC631639     |                                                                                                                  | 631639 | 0.54  | 0.83  | 0.89  | 0.60 | -0.41 ns |
| Lonrf1        |                                                                                                                  | 244421 | 0.54  | 0.83  | 0.89  | 0.60 | -0.41 ns |
| Alkbh2        | alkB, alkylation repair homolog 2 (E. coli)                                                                      | 231642 | 0.32  | 0.39  | 0.43  | 0.74 | -0.50 ns |
| Wdr76         | WD repeat domain 76                                                                                              | 241627 | 0.74  | 0.56  | 0.61  | 1.20 | 0.52 ns  |
| Tia1          | Tia1 cytotoxic granule-associated RNA binding protein-like 1                                                     | 21843  | 0.88  | 0.81  | 1.04  | 0.84 | -0.26 ns |
| Sema4b        | sema domain, immunoglobulin domain (Ig), transmembrane domain (TM) and short cytoplasmic domain, (semaphorin) 4B | 20352  | 0.93  | 0.84  | 0.55  | 1.69 | 0.69 ns  |
| Zfp369        | zinc finger protein 369                                                                                          | 170936 | 0.51  | 0.57  | 0.51  | 1.01 | -0.04 ns |
| Map3k9        | mitogen-activated protein kinase kinase kinase 9                                                                 | 338372 | 0.33  | 0.41  | 0.42  | 0.77 | -0.75 ns |
| EG434404      |                                                                                                                  | 434404 | 22.02 | 20.41 | 18.02 | 1.22 | 0.82 *   |
| LOC638497     |                                                                                                                  | 638497 | 22.02 | 20.41 | 18.02 | 1.22 | 0.82 *   |
| Nbeal2        | neurobeachin-like 2                                                                                              | 235627 | 0.39  | 0.42  | 0.34  | 1.15 | 0.65 ns  |
| Prpf4b        | PRP4 pre-mRNA processing factor 4 homolog B (yeast)                                                              | 19134  | 1.34  | 1.39  | 1.97  | 0.68 | -0.70 ns |
| H3f3b         | H3 histone, family 3B                                                                                            | 15081  | 20.36 | 17.54 | 16.41 | 1.23 | 0.93 **  |
| Gm71          | gene model 71, (NCBI)                                                                                            | 207965 | 0.78  | 0.87  | 1.34  | 0.58 | -0.62 ns |
| Zrsr2         | zinc finger (CCCH type), RNA binding motif and serine/arginine rich 2                                            | 22184  | 0.40  | 0.48  | 0.53  | 0.75 | 0.22 ns  |
| Gnaq          | guanine nucleotide binding protein, alpha q polypeptide                                                          | 14682  | 1.85  | 2.01  | 1.30  | 1.42 | 0.48 ns  |
| Slc29a3       | solute carrier family 29 (nucleoside transporters), member 3                                                     | 71279  | 0.37  | 0.44  | 0.33  | 1.14 | -0.09 ns |
| 1700025G04Rik | RIKEN cDNA 1700025G04 gene                                                                                       | 69399  | 0.43  | 0.47  | 0.08  | 5.17 | 0.46 ns  |
| Ap1s3         | adaptor-related protein complex AP-1, sigma 3                                                                    | 252903 | 2.01  | 2.00  | 1.00  | 2.00 | 0.34 ns  |
| Kif13a        | kinesin family member 13A                                                                                        | 16553  | 0.49  | 0.55  | 0.44  | 1.10 | 0.36 ns  |
| A230067G21Rik | RIKEN cDNA A230067G21 gene                                                                                       | 241694 | 0.36  | 0.49  | 0.40  | 0.88 | -0.14 ns |
| Tmem134       | transmembrane protein 134                                                                                        | 66990  | 1.10  | 0.92  | 0.98  | 1.11 | 0.50 ns  |
| D3Erd254e     | DNA segment, Chr 3, ERATO Doi 254, expressed                                                                     | 241944 | 0.70  | 0.73  | 0.63  | 1.10 | 0.08 ns  |
| Zfp192        | zinc finger protein 192                                                                                          | 93681  | 1.03  | 0.90  | 0.77  | 1.34 | 0.88 *   |
| Hspa8         | heat shock protein 8                                                                                             | 15481  | 25.66 | 22.75 | 18.86 | 1.35 | 0.94 **  |
| Galk2         | galactokinase 2                                                                                                  | 69976  | 0.60  | 0.54  | 0.47  | 1.28 | 0.26 ns  |
| Samm50        | sorting and assembly machinery component 50 homolog (S. cerevisiae)                                              | 68653  | 3.23  | 3.21  | 3.94  | 0.82 | -0.55 ns |
| Ric8          | resistance to inhibitors of cholinesterase 8 homolog (C. elegans)                                                | 101489 | 0.66  | 0.81  | 1.07  | 0.62 | -0.82 *  |
| Vasn          | vasorin                                                                                                          | 246154 | 0.84  | 1.09  | 1.91  | 0.44 | -0.84 *  |

|               |                                                                                          |        |       |       |       |      |          |
|---------------|------------------------------------------------------------------------------------------|--------|-------|-------|-------|------|----------|
| Ywhab         | tyrosine 3-monooxygenase/tryptophan 5-monooxygenase activation protein, beta polypeptide | 54401  | 15.63 | 14.57 | 14.08 | 1.10 | 0.43 ns  |
| Kctd3         | potassium channel tetramerisation domain containing 3                                    | 226823 | 1.96  | 2.71  | 2.75  | 0.71 | -0.32 ns |
| 4930427A07Rik | RIKEN cDNA 4930427A07 gene                                                               | 104732 | 1.31  | 1.21  | 1.54  | 0.85 | -0.10 ns |
| Rod1          | ROD1 regulator of differentiation 1 (S. pombe)                                           | 230257 | 7.05  | 6.85  | 7.86  | 0.89 | -0.56 ns |
| C1qbp         | complement component 1, q subcomponent binding protein                                   | 12261  | 11.62 | 9.93  | 8.91  | 1.30 | 0.82 *   |
| Stt3a         | STT3, subunit of the oligosaccharyltransferase complex, homolog A (S. cerevisiae)        | 16430  | 5.07  | 5.06  | 4.90  | 1.03 | 0.61 ns  |
| Lnx1          | ligand of numb-protein X 1                                                               | 16924  | 0.58  | 0.51  | 0.59  | 0.96 | -0.19 ns |
| Bace1         | beta-site APP cleaving enzyme 1                                                          | 23821  | 0.88  | 0.82  | 0.79  | 1.11 | 0.60 ns  |
| Ugcgl1        | UDP-glucose ceramide glucosyltransferase-like 1                                          | 320011 | 1.15  | 0.96  | 0.78  | 1.46 | 0.55 ns  |
| Ssh1          | slingshot homolog 1 (Drosophila)                                                         | 231637 | 1.53  | 1.47  | 1.22  | 1.26 | 0.19 ns  |
| Pigh          | phosphatidylinositol glycan anchor biosynthesis, class H                                 | 110417 | 0.58  | 0.60  | 0.82  | 0.70 | -0.60 ns |
| Ubd2          | ubiquitin domain containing 2                                                            | 327900 | 0.88  | 0.95  | 0.87  | 1.00 | 0.54 ns  |
| Tubgcp2       | tubulin, gamma complex associated protein 2                                              | 74237  | 1.05  | 1.04  | 1.19  | 0.88 | -0.85 *  |
| Camk2b        | Calcium/calmodulin-dependent protein kinase II, beta                                     | 12323  | 20.98 | 16.44 | 11.73 | 1.78 | 0.44 ns  |
| Akap2         | A kinase (PRKA) anchor protein 2                                                         | 11641  | 0.45  | 0.49  | 0.59  | 0.76 | -0.86 *  |
| Tax1bp3       |                                                                                          | 76281  | 4.73  | 4.72  | 6.02  | 0.78 | -0.65 ns |
| Tm9sf2        | transmembrane 9 superfamily member 2                                                     | 68059  | 7.91  | 7.62  | 8.48  | 0.93 | -0.25 ns |
| 2700023E23Rik | RIKEN cDNA 2700023E23 gene                                                               | 70036  | 0.63  | 0.53  | 0.36  | 1.77 | 0.70 ns  |
| Becn1         | beclin 1 (coiled-coil, myosin-like BCL2-interacting protein)                             | 56208  | 2.59  | 3.00  | 3.56  | 0.72 | -0.66 ns |
| Dpp9          | dipeptidylpeptidase 9                                                                    | 224897 | 1.25  | 1.10  | 0.71  | 1.76 | 0.96 **  |
| Alg8          | asparagine-linked glycosylation 8 homolog (yeast, alpha-1,3-glucosyltransferase)         | 381903 | 0.27  | 0.30  | 0.39  | 0.70 | -0.44 ns |
| Hmgn1         | high mobility group nucleosomal binding domain 1                                         | 15312  | 20.21 | 22.51 | 19.79 | 1.02 | 0.14 ns  |
| Socs3         | suppressor of cytokine signaling 3                                                       | 12702  | 0.23  | 0.32  | 0.42  | 0.55 | -0.87 *  |
| Scpep1        | serine carboxypeptidase 1                                                                | 74617  | 4.25  | 4.61  | 5.05  | 0.84 | -0.75 ns |
| Unc45a        | Unc-45 homolog A (C. elegans)                                                            | 101869 | 0.25  | 0.31  | 0.42  | 0.60 | -0.89 *  |
| Galnt4        | UDP-N-acetyl-alpha-D-galactosamine:polypeptide N-acetylgalactosaminyltransferase 4       | 14426  | 0.46  | 0.37  | 0.37  | 1.25 | 0.20 ns  |
| AI931714      | expressed sequence AI931714                                                              | 102182 | 0.39  | 0.35  | 0.40  | 0.98 | 0.32 ns  |
| Rab3gap1      | RAB3 GTPase activating protein subunit 1                                                 | 226407 | 0.80  | 0.84  | 0.56  | 1.42 | 0.62 ns  |
| Nsmce1        | Non-SMC element 1 homolog (S. cerevisiae)                                                | 67711  | 0.95  | 0.95  | 1.14  | 0.82 | -0.53 ns |
| Lztr1         | leucine-zipper-like transcriptional regulator, 1                                         | 66863  | 1.80  | 2.26  | 2.97  | 0.61 | -0.88 *  |
| Srp14         | signal recognition particle 14                                                           | 20813  | 3.66  | 3.17  | 3.48  | 1.05 | -0.18 ns |
| Wdr6          | WD repeat domain 6                                                                       | 83669  | 2.85  | 2.78  | 2.32  | 1.22 | 0.72 ns  |
| Fbxl11        | F-box and leucine-rich repeat protein 11                                                 | 225876 | 0.94  | 1.00  | 0.61  | 1.53 | 0.70 ns  |
| Mars          | methionine-tRNA synthetase                                                               | 216443 | 2.52  | 2.19  | 1.94  | 1.29 | 0.31 ns  |
| Snx17         | sorting nexin 17                                                                         | 266781 | 7.14  | 7.12  | 6.44  | 1.10 | 0.50 ns  |
| Ptpc7         | PTC7 protein phosphatase homolog (S. cerevisiae)                                         | 320717 | 1.61  | 1.56  | 1.48  | 1.08 | 0.10 ns  |
| Gclc          | Glutamate-cysteine ligase, catalytic subunit                                             | 14629  | 1.02  | 1.20  | 1.00  | 1.01 | 0.42 ns  |
| Crks          | Cdc2-related kinase, arginine/serine-rich                                                | 69131  | 0.57  | 0.58  | 0.59  | 0.96 | 0.01 ns  |
| Tmed2         | transmembrane emp24 domain trafficking protein 2                                         | 56334  | 11.00 | 10.78 | 10.89 | 1.01 | -0.08 ns |
| Hadh          | hydroxyacyl-Coenzyme A dehydrogenase                                                     | 15107  | 6.53  | 6.31  | 4.09  | 1.59 | 0.21 ns  |
| Dbi           | diazepam binding inhibitor                                                               | 13167  | 4.46  | 4.79  | 4.45  | 1.00 | -0.19 ns |
| Arid1b        | AT rich interactive domain 1B (Swi1 like)                                                | 239985 | 1.09  | 1.21  | 0.83  | 1.31 | 0.59 ns  |
| Cct6a         | chaperonin subunit 6a (zeta)                                                             | 12466  | 9.40  | 9.68  | 9.31  | 1.00 | -0.43 ns |
| Kif23         | kinesin family member 23                                                                 | 71819  | 2.17  | 2.26  | 2.36  | 0.92 | 0.41 ns  |
| Uqcrb         | ubiquinol-cytochrome c reductase binding protein                                         | 67530  | 15.35 | 16.82 | 16.90 | 0.90 | -0.67 ns |
| Bcl2l11       | BCL2-like 11 (apoptosis facilitator)                                                     | 12125  | 2.07  | 3.57  | 2.69  | 0.77 | -0.37 ns |
| Top3b         | topoisomerase (DNA) III beta                                                             | 21976  | 0.92  | 1.07  | 1.51  | 0.60 | -0.84 *  |
| Brd9          | bromodomain containing 9                                                                 | 105246 | 0.49  | 0.77  | 0.80  | 0.62 | -0.78 ns |
| Cwf19l2       | CWF19-like 2, cell cycle control (S. pombe)                                              | 244672 | 0.84  | 0.65  | 0.30  | 2.76 | 0.58 ns  |
| Rbm41         | RNA binding motif protein 41                                                             | 237073 | 0.30  | 0.38  | 0.38  | 0.81 | 0.20 ns  |
| Preb          | prolactin regulatory element binding                                                     | 50907  | 1.22  | 1.23  | 1.69  | 0.72 | -0.77 ns |
| Fbxl4         | F-box and leucine-rich repeat protein 4                                                  | 269514 | 0.27  | 0.27  | 0.37  | 0.72 | -0.62 ns |
| Snx14         | sorting nexin 14                                                                         | 244962 | 0.49  | 0.50  | 0.53  | 0.91 | 0.24 ns  |
| Cramp1l       | Crm, cramped-like (Drosophila)                                                           | 57354  | 1.77  | 1.54  | 1.08  | 1.63 | 0.91 *   |
| Pum1          | pumilio 1 (Drosophila)                                                                   | 80912  | 0.99  | 1.22  | 0.82  | 1.20 | 0.33 ns  |
| Pold1         | polymerase (DNA directed), delta 1, catalytic subunit                                    | 18971  | 1.13  | 1.10  | 1.52  | 0.74 | -0.78 ns |
| D6Wsu116e     | DNA segment, Chr 6, Wayne State University 116, expressed                                | 28006  | 2.23  | 2.23  | 2.51  | 0.88 | -0.89 *  |
| Rbm27         | RNA binding motif protein 27                                                             | 225432 | 0.66  | 0.72  | 0.66  | 0.99 | 0.48 ns  |
| Gli3          | GLI-Kruppel family member GLI3                                                           | 14634  | 0.95  | 0.90  | 0.56  | 1.67 | 0.18 ns  |
| Cyca          |                                                                                          | 13063  | 6.90  | 7.86  | 9.51  | 0.72 | -0.81 ns |
| LOC670717     |                                                                                          | 670717 | 6.90  | 7.86  | 9.51  | 0.72 | -0.81 ns |
| LOC672195     |                                                                                          | 672195 | 6.90  | 7.86  | 9.51  | 0.72 | -0.81 ns |
| Cdc25c        | cell division cycle 25 homolog C (S. pombe)                                              | 12532  | 0.37  | 0.53  | 0.54  | 0.69 | 0.07 ns  |
| Aacs          | acetoacetyl-CoA synthetase                                                               | 78894  | 0.63  | 0.54  | 0.58  | 1.09 | -0.14 ns |
| LOC631302     |                                                                                          | 631302 | 1.15  | 1.39  | 1.57  | 0.73 | 0.21 ns  |
| Pqbp1         |                                                                                          | 54633  | 1.15  | 1.39  | 1.57  | 0.73 | 0.21 ns  |
| Pdhx          | pyruvate dehydrogenase complex, component X                                              | 27402  | 0.41  | 0.33  | 0.38  | 1.08 | -0.28 ns |
| Itgb3bp       | integrin beta 3 binding protein (beta3-endonexin)                                        | 67733  | 0.28  | 0.28  | 0.50  | 0.57 | -0.56 ns |
| Elmo2         | engulfment and cell motility 2, ced-12 homolog (C. elegans)                              | 140579 | 0.66  | 0.56  | 0.72  | 0.92 | -0.59 ns |
| Mrps15        | mitochondrial ribosomal protein S15                                                      | 66407  | 0.88  | 0.92  | 1.14  | 0.77 | -0.53 ns |
| Rrp1b         | ribosomal RNA processing 1 homolog B (S. cerevisiae)                                     | 72462  | 0.70  | 0.76  | 0.45  | 1.54 | 0.64 ns  |
| Mettl2        | methyltransferase like 2                                                                 | 52686  | 0.71  | 0.75  | 0.69  | 1.03 | 0.34 ns  |
| Pxn           | paxillin                                                                                 | 19303  | 4.98  | 4.07  | 4.85  | 1.02 | -0.16 ns |
| A730098P11Rik |                                                                                          | 624582 | 12.41 | 11.70 | 11.29 | 1.09 | 0.76 ns  |
| EG627352      |                                                                                          | 627352 | 12.41 | 11.70 | 11.29 | 1.09 | 0.76 ns  |
| Morf4l1       |                                                                                          | 21761  | 12.41 | 11.70 | 11.29 | 1.09 | 0.76 ns  |
| Ssh2          | slingshot homolog 2 (Drosophila)                                                         | 237860 | 0.75  | 0.67  | 0.54  | 1.37 | 0.44 ns  |
| Setd5         | SET domain containing 5                                                                  | 72895  | 1.44  | 1.56  | 2.02  | 0.71 | -0.90 *  |
| Ndrp1         | N-myc downstream regulated gene 1                                                        | 17988  | 8.49  | 6.44  | 12.12 | 0.70 | -0.31 ns |
| Copb2         | coatamer protein complex, subunit beta 2 (beta prime)                                    | 50797  | 2.11  | 2.24  | 2.22  | 0.95 | 0.43 ns  |
| Zfp706        | zinc finger protein 706                                                                  | 68036  | 3.47  | 3.34  | 3.89  | 0.89 | -0.39 ns |
| Fkbp1a        | FK506 binding protein 1a                                                                 | 14225  | 4.65  | 5.02  | 5.85  | 0.79 | -0.19 ns |
| Ranbp9        | RAN binding protein 9                                                                    | 56705  | 1.13  | 1.02  | 1.51  | 0.74 | -0.59 ns |

|               |                                                                                       |        |       |       |       |      |          |
|---------------|---------------------------------------------------------------------------------------|--------|-------|-------|-------|------|----------|
| 5430407P10Rik | RIKEN cDNA 5430407P10 gene                                                            | 227545 | 0.81  | 0.70  | 0.59  | 1.35 | 0.93 **  |
| Ddr1          | discoidin domain receptor family, member 1                                            | 12305  | 7.54  | 7.28  | 6.57  | 1.14 | 0.94 **  |
| Rbbp7         | retinoblastoma binding protein 7                                                      | 245688 | 9.06  | 9.27  | 11.49 | 0.78 | -0.05 ns |
| Hoxb3         | homeo box B3                                                                          | 15410  | 2.64  | 2.31  | 1.78  | 1.48 | 0.39 ns  |
| Klhl17        |                                                                                       | 231003 | 0.41  | 0.38  | 0.33  | 1.23 | 0.73 ns  |
| Plekhn1       |                                                                                       | 231002 | 0.41  | 0.38  | 0.33  | 1.23 | 0.73 ns  |
| Emx2          | empty spiracles homolog 2 (Drosophila)                                                | 13797  | 1.14  | 1.17  | 0.84  | 1.35 | 0.71 ns  |
| Clspn         | claspin homolog (Xenopus laevis)                                                      | 269582 | 1.00  | 1.16  | 1.40  | 0.71 | -0.25 ns |
| 8430426H19Rik | RIKEN cDNA 8430426H19 gene                                                            | 71508  | 0.59  | 0.67  | 0.53  | 1.11 | 0.62 ns  |
| Tmem171       | transmembrane protein 171                                                             | 380863 | 0.27  | 0.51  | 1.11  | 0.24 | -0.54 ns |
| Ccnh          |                                                                                       | 66671  | 1.65  | 2.11  | 2.22  | 0.74 | -0.75 ns |
| Trim28        | tripartite motif protein 28                                                           | 21849  | 6.10  | 5.73  | 5.89  | 1.03 | -0.32 ns |
| 2610002J02Rik | RIKEN cDNA 2610002J02 gene                                                            | 67513  | 0.52  | 0.51  | 0.57  | 0.91 | 0.16 ns  |
| Gsn           | gelsolin                                                                              | 227753 | 6.95  | 5.55  | 3.66  | 1.89 | 0.72 ns  |
| Cdk2ap1       | CDK2 (cyclin-dependent kinase 2)-associated protein 1                                 | 13445  | 6.14  | 6.24  | 6.38  | 0.96 | -0.02 ns |
| Zfp748        | zinc finger protein 748                                                               | 212276 | 0.32  | 0.26  | 0.47  | 0.67 | -0.40 ns |
| Klf9          | Kruppel-like factor 9                                                                 | 16601  | 1.75  | 1.67  | 1.10  | 1.58 | 0.90 *   |
| Ppwd1         | peptidylprolyl isomerase domain and WD repeat containing 1                            | 238831 | 0.24  | 0.31  | 0.36  | 0.66 | -0.66 ns |
| Rps20         | ribosomal protein S20                                                                 | 67427  | 19.27 | 19.73 | 17.98 | 1.07 | -0.07 ns |
| Limd2         |                                                                                       | 67803  | 1.74  | 1.49  | 1.56  | 1.11 | -0.26 ns |
| LOC632329     |                                                                                       | 632329 | 1.74  | 1.49  | 1.56  | 1.11 | -0.26 ns |
| Fbxl20        | F-box and leucine-rich repeat protein 20                                              | 72194  | 0.92  | 0.80  | 1.02  | 0.90 | -0.57 ns |
| Rsl1d1        | ribosomal L1 domain containing 1                                                      | 66409  | 1.86  | 1.99  | 2.10  | 0.88 | -0.86 *  |
| Atp11a        | ATPase, class VI, type 11A                                                            | 50770  | 3.26  | 4.14  | 4.05  | 0.80 | -0.52 ns |
| Ppp2ca        | protein phosphatase 2 (formerly 2A), catalytic subunit, alpha isoform                 | 19052  | 1.97  | 2.00  | 2.06  | 0.95 | -0.09 ns |
| 2310002J21Rik | RIKEN cDNA 2310002J21 gene                                                            | 66360  | 3.57  | 3.17  | 1.63  | 2.19 | 0.64 ns  |
| Dido1         | death inducer-obliterater 1                                                           | 23856  | 0.86  | 0.96  | 0.89  | 0.95 | -0.56 ns |
| Pltp          | phospholipid transfer protein                                                         | 18830  | 0.32  | 0.35  | 0.24  | 1.30 | 0.05 ns  |
| Rcbtb1        | regulator of chromosome condensation (RCC1) and BTB (POZ) domain containing protein 1 | 71330  | 0.53  | 0.53  | 0.55  | 0.96 | 0.16 ns  |
| Prkar2b       | protein kinase, cAMP dependent regulatory, type II beta                               | 19088  | 1.59  | 1.50  | 2.57  | 0.62 | -0.71 ns |
| Ccnt1         | cyclin T1                                                                             | 12455  | 0.86  | 0.89  | 1.13  | 0.76 | -0.61 ns |
| Pik3r3        | phosphatidylinositol 3 kinase, regulatory subunit, polypeptide 3 (p55)                | 18710  | 0.42  | 0.46  | 0.80  | 0.53 | -0.88 *  |
| Npat          | nuclear protein in the AT region                                                      | 244879 | 1.19  | 1.09  | 0.88  | 1.35 | 0.88 *   |
| Aph1b         | anterior pharynx defective 1b homolog (C. elegans)                                    | 208117 | 0.52  | 0.33  | 0.25  | 2.05 | 0.83 *   |
| Zfp652        | zinc finger protein 652                                                               | 268469 | 0.39  | 0.26  | 0.43  | 0.90 | -0.32 ns |
| Elov1         | elongation of very long chain fatty acids (FEN1/Elo2, SUR4/Elo3, yeast)-like 1        | 54325  | 1.27  | 1.37  | 1.81  | 0.70 | -0.87 *  |
| Prpf19        | PRP19/PSO4 pre-mRNA processing factor 19 homolog (S. cerevisiae)                      | 28000  | 9.12  | 9.91  | 7.87  | 1.15 | 0.38 ns  |
| Sdccag8       | serologically defined colon cancer antigen 8                                          | 76816  | 0.39  | 0.50  | 0.34  | 1.17 | 0.23 ns  |
| Qrs1          | glutaminyl-tRNA synthase (glutamine-hydrolyzing)-like 1                               | 76563  | 0.72  | 0.78  | 0.67  | 1.06 | -0.21 ns |
| 4933429F08Rik | RIKEN cDNA 4933429F08 gene                                                            | 328967 | 0.49  | 0.34  | 0.14  | 3.44 | 0.53 ns  |
| Atp5d         | ATP synthase, H+ transporting, mitochondrial F1 complex, delta subunit                | 66043  | 7.46  | 7.18  | 5.98  | 1.24 | 0.41 ns  |
| Cox5b         | cytochrome c oxidase, subunit Vb                                                      | 12859  | 8.49  | 8.07  | 6.58  | 1.28 | 0.61 ns  |
| Heatr3        | HEAT repeat containing 3                                                              | 234549 | 0.53  | 0.44  | 0.49  | 1.06 | 0.23 ns  |
| Nxt2          | nuclear transport factor 2-like export factor 2                                       | 237082 | 0.42  | 0.38  | 0.86  | 0.48 | -0.56 ns |
| Rnf7          | ring finger protein 7                                                                 | 19823  | 1.51  | 1.62  | 1.29  | 1.16 | 0.72 ns  |
| 493241716Rik  | RIKEN cDNA 493241716 gene                                                             | 234740 | 0.46  | 0.46  | 0.35  | 1.31 | 0.08 ns  |
| 1500005K14Rik | RIKEN cDNA 1500005K14 gene                                                            | 76566  | 1.51  | 1.70  | 0.69  | 2.17 | 0.34 ns  |
| Vcpip1        | valosin containing protein (p97)/p47 complex interacting protein 1                    | 70675  | 0.66  | 0.70  | 0.50  | 1.30 | 0.24 ns  |
| Camk2n1       | calcium/calmodulin-dependent protein kinase II inhibitor 1                            | 66259  | 0.38  | 0.32  | 0.11  | 3.54 | 0.61 ns  |
| Jmjd3         | jumonji domain containing 3                                                           | 216850 | 1.37  | 1.46  | 1.53  | 0.89 | -0.61 ns |
| Acn9          | ACN9 homolog (S. cerevisiae)                                                          | 71238  | 0.33  | 0.43  | 0.47  | 0.68 | -0.45 ns |
| Bptf          | bromodomain PHD finger transcription factor                                           | 207165 | 3.23  | 3.37  | 3.21  | 1.00 | 0.36 ns  |
| Bsg           | basigin                                                                               | 12215  | 11.91 | 10.67 | 13.09 | 0.91 | -0.62 ns |
| Mthfd11       | methylenetetrahydrofolate dehydrogenase (NADP+ dependent) 1-like                      | 270685 | 1.24  | 1.24  | 1.21  | 1.01 | 0.41 ns  |
| LOC546058     | Hypothetical protein LOC546058                                                        | 546058 | 0.32  | 0.40  | 0.29  | 1.12 | 0.57 ns  |
| E130016E03Rik | RIKEN cDNA E130016E03 gene                                                            | 623474 | 0.49  | 0.38  | 0.53  | 0.92 | 0.17 ns  |
| Qars          | glutaminyl-tRNA synthetase                                                            | 97541  | 1.99  | 2.26  | 2.16  | 0.92 | 0.18 ns  |
| Aco1          | aconitase 1                                                                           | 11428  | 1.41  | 1.89  | 1.73  | 0.81 | -0.69 ns |
| Polr3k        | Polymerase (RNA) III (DNA directed) polypeptide K                                     | 67005  | 1.32  | 1.44  | 1.20  | 1.10 | -0.29 ns |
| Acpl2         | acid phosphatase-like 2                                                               | 235534 | 1.36  | 2.10  | 2.95  | 0.46 | -0.91 *  |
| Brp16         | brain protein 16                                                                      | 59053  | 1.52  | 1.55  | 1.22  | 1.24 | 0.79 ns  |
| Morf412       |                                                                                       | 56397  | 7.81  | 8.39  | 9.52  | 0.82 | 0.16 ns  |
| Foxn1         | forkhead box N1                                                                       | 15218  | 0.37  | 0.62  | 0.72  | 0.51 | -0.03 ns |
| EG382639      | predicted gene, EG382639                                                              | 382639 | 1.14  | 1.15  | 1.23  | 0.92 | -0.64 ns |
| Phf201        | PHD finger protein 20-like 1                                                          | 239510 | 0.65  | 0.67  | 0.71  | 0.92 | -0.12 ns |
| C130022K22Rik | RIKEN cDNA C130022K22 gene                                                            | 232236 | 0.42  | 0.47  | 0.46  | 0.92 | 0.15 ns  |
| 2810455K09Rik | RIKEN cDNA 2810455K09 gene                                                            | 72805  | 0.35  | 0.39  | 0.40  | 0.88 | 0.11 ns  |
| Slc16a4       | Solute carrier family 16 (monocarboxylic acid transporters), member 4                 | 229699 | 0.36  | 0.44  | 0.27  | 1.34 | 0.32 ns  |
| Tert          | telomerase reverse transcriptase                                                      | 21752  | 0.17  | 0.36  | 0.57  | 0.30 | -0.90 *  |
| Alms1         | Alstrom syndrome 1 homolog (human)                                                    | 236266 | 0.46  | 0.34  | 0.47  | 0.99 | 0.25 ns  |
| Ikzf2         | IKAROS family zinc finger 2                                                           | 22779  | 0.29  | 0.26  | 0.21  | 1.38 | -0.01 ns |
| D14Abb1e      | DNA segment, Chr 14, Abbott 1 expressed                                               | 218850 | 0.72  | 0.67  | 0.82  | 0.87 | -0.79 ns |
| Frem2         | Fras1 related extracellular matrix protein 2                                          | 242022 | 2.38  | 2.45  | 0.79  | 3.00 | -0.11 ns |
| B3galt1       | beta 1,3-galactosyltransferase-like                                                   | 381694 | 0.57  | 0.65  | 0.80  | 0.71 | -0.36 ns |
| 4732474O15Rik | RIKEN cDNA 4732474O15 gene                                                            | 238455 | 1.40  | 1.53  | 1.33  | 1.05 | -0.11 ns |
| Ascc3         | activating signal cointegrator 1 complex subunit 3                                    | 77987  | 0.47  | 0.44  | 0.44  | 1.06 | -0.36 ns |
| Plch1         | phospholipase C, eta 1                                                                | 269437 | 0.28  | 0.45  | 0.48  | 0.58 | -0.87 *  |
| Rai16         | retinoic acid induced 16                                                              | 239170 | 0.52  | 0.68  | 0.68  | 0.77 | -0.46 ns |
| Hsd17b7       | hydroxysteroid (17-beta) dehydrogenase 7                                              | 15490  | 0.45  | 0.42  | 0.39  | 1.14 | 0.72 ns  |
| Pld2          | phospholipase D2                                                                      | 18806  | 0.60  | 0.70  | 0.70  | 0.85 | -0.28 ns |
| Dot11         | DOT1-like, histone H3 methyltransferase (S. cerevisiae)                               | 208266 | 0.45  | 0.46  | 0.39  | 1.14 | 0.24 ns  |
| Zfp187        | zinc finger protein 187                                                               | 432731 | 1.01  | 0.95  | 0.89  | 1.13 | 0.74 ns  |
| Amy2          | Amylase 2, pancreatic                                                                 | 11723  | 0.78  | 0.71  | 0.29  | 2.65 | 0.83 *   |
| Eya1          | eyes absent 1 homolog (Drosophila)                                                    | 14048  | 0.82  | 0.60  | 0.46  | 1.77 | 0.54 ns  |

|               |                                                                                     |        |       |       |       |      |          |
|---------------|-------------------------------------------------------------------------------------|--------|-------|-------|-------|------|----------|
| Ptpla         | protein tyrosine phosphatase-like (proline instead of catalytic arginine), member a | 30963  | 0.68  | 0.55  | 0.14  | 4.88 | 0.83 *   |
| Shroom4       | shroom family member 4                                                              | 208431 | 1.20  | 0.93  | 1.02  | 1.17 | 0.47 ns  |
| Zfp295        | zinc finger protein 295                                                             | 114565 | 0.57  | 0.47  | 0.68  | 0.84 | -0.07 ns |
| Ifi202b       | interferon activated gene 202B                                                      | 26388  | 0.19  | 0.47  | 1.06  | 0.18 | -0.64 ns |
| Vps13a        | vacuolar protein sorting 13A (yeast)                                                | 271564 | 0.43  | 0.41  | 0.30  | 1.42 | 0.71 ns  |
| 2510002D24Rik | RIKEN cDNA 2510002D24 gene                                                          | 72307  | 0.84  | 0.82  | 0.71  | 1.18 | 0.40 ns  |
| Tirap         | toll-interleukin 1 receptor (TIR) domain-containing adaptor protein                 | 117149 | 0.45  | 0.33  | 0.37  | 1.20 | 0.58 ns  |
| Kcnc1         | Potassium voltage-gated channel, subfamily Q, member 1                              | 16535  | 0.57  | 0.59  | 0.97  | 0.58 | -0.78 ns |
| 1810043H04Rik | RIKEN cDNA 1810043H04 gene                                                          | 208501 | 1.34  | 1.34  | 1.39  | 0.96 | 0.14 ns  |
| Sgpp2         | sphingosine-1-phosphate phosphatase 2                                               | 433323 | 1.46  | 1.63  | 0.70  | 2.09 | -0.35 ns |
| Rwdd4a        | RWD domain containing 4A                                                            | 192174 | 1.99  | 2.20  | 1.78  | 1.11 | 0.69 ns  |
| Pde7a         | phosphodiesterase 7A                                                                | 18583  | 2.55  | 2.18  | 2.03  | 1.25 | 0.07 ns  |
| Cit           | citron                                                                              | 12704  | 0.42  | 0.37  | 0.40  | 1.03 | 0.48 ns  |
| Sbno2         | strawberry notch homolog 2 (Drosophila)                                             | 216161 | 0.36  | 0.34  | 0.24  | 1.48 | 0.15 ns  |
| Cnnm3         | Cyclin M3                                                                           | 94218  | 0.34  | 0.36  | 0.75  | 0.45 | -0.83 *  |
| Bmp2k         | BMP2 inducible kinase                                                               | 140780 | 0.64  | 0.65  | 0.87  | 0.73 | -0.57 ns |
| Rasef         | RAS and EF hand domain containing                                                   | 242505 | 0.40  | 0.36  | 0.33  | 1.20 | -0.37 ns |
| 4930519N13Rik | RIKEN cDNA 4930519N13 gene                                                          | 78177  | 0.37  | 0.41  | 0.37  | 1.01 | 0.04 ns  |
| Tatdn1        | TatD DNase domain containing 1                                                      | 69694  | 0.31  | 0.29  | 0.37  | 0.84 | -0.30 ns |
| Csrp2bp       | cysteine and glycine-rich protein 2 binding protein                                 | 228714 | 0.64  | 0.76  | 0.74  | 0.87 | -0.27 ns |
| Gyg           | glycogenin                                                                          | 27357  | 0.61  | 0.92  | 1.07  | 0.57 | -0.64 ns |
| LOC669005     |                                                                                     | 669005 | 0.82  | 0.95  | 0.94  | 0.88 | -0.77 ns |
| Ppp1r13l      |                                                                                     | 333654 | 0.82  | 0.95  | 0.94  | 0.88 | -0.77 ns |
| Ppp1r16a      | protein phosphatase 1, regulatory (inhibitor) subunit 16A                           | 73062  | 0.86  | 0.84  | 0.88  | 0.98 | -0.19 ns |
| Sf1           | Splicing factor 1                                                                   | 22668  | 19.25 | 17.07 | 13.96 | 1.37 | 0.94 **  |
| Snip1         | Smad nuclear interacting protein 1                                                  | 76793  | 0.80  | 0.62  | 0.95  | 0.83 | -0.38 ns |
| Cno           | cappuccino                                                                          | 117197 | 1.40  | 1.26  | 1.81  | 0.77 | -0.46 ns |
| Lyrn5         | LYR motif containing 5                                                              | 67636  | 0.65  | 0.57  | 0.57  | 1.13 | 0.05 ns  |
| Map3k4        | mitogen activated protein kinase kinase kinase 4                                    | 26407  | 1.54  | 1.40  | 0.91  | 1.68 | 0.52 ns  |
| Dus3l         | dihydrouridine synthase 3-like (S. cerevisiae)                                      | 224907 | 0.75  | 0.71  | 0.44  | 1.68 | 0.68 ns  |
| Hps1          | Hermansky-Pudlak syndrome 1 homolog (human)                                         | 192236 | 0.76  | 0.69  | 0.34  | 2.26 | 0.90 *   |
| Ap1m1         | adaptor-related protein complex AP-1, mu subunit 1                                  | 11767  | 0.65  | 0.71  | 0.66  | 0.98 | 0.29 ns  |
| Smad1         | MAD homolog 1 (Drosophila)                                                          | 17125  | 0.99  | 1.12  | 0.76  | 1.30 | 0.57 ns  |
| Chrac1        | chromatin accessibility complex 1                                                   | 93696  | 0.71  | 0.74  | 1.64  | 0.43 | -0.51 ns |
| Fbxl10        | F-box and leucine-rich repeat protein 10                                            | 30841  | 1.12  | 1.41  | 1.55  | 0.72 | -0.91 *  |
| Nipa2         | non imprinted in Prader-Willi/Angelman syndrome 2 homolog (human)                   | 93790  | 2.71  | 2.52  | 2.58  | 1.04 | 0.66 ns  |
| Mtmr4         | myotubularin related protein 4                                                      | 170749 | 1.12  | 0.96  | 1.17  | 0.95 | -0.31 ns |
| Rnf185        | Ring finger protein 185                                                             | 193670 | 0.96  | 0.87  | 0.84  | 1.14 | 0.55 ns  |
| Sbsn          | suprabasin                                                                          | 282619 | 0.44  | 0.52  | 1.17  | 0.38 | -0.61 ns |
| ORF34         | Open reading frame 34                                                               | 207375 | 0.26  | 0.28  | 0.20  | 1.24 | 0.64 ns  |
| Ccnj1         | cyclin J-like                                                                       | 380694 | 0.70  | 0.51  | 0.14  | 5.02 | 0.40 ns  |
| Rab3a         | RAB3A, member RAS oncogene family                                                   | 19339  | 0.71  | 0.69  | 0.69  | 1.03 | -0.15 ns |
| Rps17         | ribosomal protein S17                                                               | 20068  | 24.35 | 21.10 | 18.50 | 1.31 | 0.93 **  |
| Cln8          | ceroid-lipofuscinosis, neuronal 8                                                   | 26889  | 0.25  | 0.40  | 0.34  | 0.73 | -0.25 ns |
| Zfp407        | zinc finger protein 407                                                             | 240476 | 0.49  | 0.47  | 0.54  | 0.90 | 0.24 ns  |
| Stx6          | syntaxin 6                                                                          | 58244  | 1.49  | 1.43  | 1.21  | 1.22 | 0.34 ns  |
| EG667682      |                                                                                     | 667682 | 25.43 | 24.53 | 20.38 | 1.24 | 0.67 ns  |
| Ero1l         |                                                                                     | 50527  | 25.43 | 24.53 | 20.38 | 1.24 | 0.67 ns  |
| Rpl31         |                                                                                     | 114641 | 25.43 | 24.53 | 20.38 | 1.24 | 0.67 ns  |
| Zfyve27       | zinc finger, FYVE domain containing 27                                              | 319740 | 0.71  | 0.66  | 0.56  | 1.26 | 0.78 ns  |
| Samd4b        | sterile alpha motif domain containing 4B                                            | 233033 | 0.46  | 0.52  | 0.39  | 1.19 | 0.72 ns  |
| Ap1s2         | adaptor-related protein complex 1, sigma 2 subunit                                  | 108012 | 0.20  | 0.30  | 0.36  | 0.54 | 0.00 ns  |
| 2610510H03Rik | RIKEN cDNA 2610510H03 gene                                                          | 68215  | 1.89  | 1.59  | 1.68  | 1.12 | 0.58 ns  |
| Smyd4         | SET and MYND domain containing 4                                                    | 319822 | 0.48  | 0.48  | 0.35  | 1.36 | 0.20 ns  |
| 1700109F18Rik | RIKEN cDNA 1700109F18 gene                                                          | 73429  | 1.38  | 1.29  | 0.59  | 2.33 | 0.52 ns  |
| Ppp1ca        | protein phosphatase 1, catalytic subunit, alpha isoform                             | 19045  | 12.54 | 11.20 | 9.97  | 1.25 | 0.95 **  |
| Aldh7a1       | aldehyde dehydrogenase family 7, member A1                                          | 110695 | 0.54  | 0.56  | 0.33  | 1.65 | 0.47 ns  |
| Slbp          | stem-loop binding protein                                                           | 20492  | 6.15  | 6.65  | 7.18  | 0.85 | -0.30 ns |
| Ext2          | exostoses (multiple) 2                                                              | 14043  | 0.93  | 0.64  | 0.67  | 1.37 | 0.15 ns  |
| Cops5         | COP9 (constitutive photomorphogenic) homolog, subunit 5 (Arabidopsis thaliana)      | 26754  | 2.75  | 2.61  | 2.08  | 1.31 | 0.37 ns  |
| 5730403B10Rik | RIKEN cDNA 5730403B10 gene                                                          | 66626  | 0.64  | 0.69  | 1.33  | 0.48 | -0.94 ** |
| Dexi          | dexamethasone-induced transcript                                                    | 58239  | 0.33  | 0.35  | 0.38  | 0.87 | -0.52 ns |
| Rps23         | ribosomal protein S23                                                               | 66475  | 17.89 | 20.93 | 18.47 | 0.96 | -0.11 ns |
| Lonp2         | lon peptidase 2, peroxisomal                                                        | 66887  | 0.44  | 0.52  | 0.47  | 0.92 | 0.25 ns  |
| Snx4          | sorting nexin 4                                                                     | 69150  | 1.58  | 1.38  | 1.71  | 0.92 | -0.56 ns |
| Tm9sf3        | transmembrane 9 superfamily member 3                                                | 107358 | 5.28  | 5.22  | 4.78  | 1.10 | 0.32 ns  |
| Ptpn6         | protein tyrosine phosphatase, non-receptor type 6                                   | 15170  | 0.45  | 0.50  | 0.73  | 0.61 | -0.88 *  |
| Ap1m2         | adaptor protein complex AP-1, mu 2 subunit                                          | 11768  | 2.15  | 2.17  | 2.10  | 1.02 | 0.58 ns  |
| Osbp1a        | oxysterol binding protein-like 1A                                                   | 64291  | 0.38  | 0.43  | 0.39  | 0.99 | -0.25 ns |
| Phyh          | phytanoyl-CoA hydroxylase                                                           | 16922  | 0.51  | 0.44  | 0.22  | 2.26 | 0.95 **  |
| Mrps11        | mitochondrial ribosomal protein S11                                                 | 67994  | 0.43  | 0.54  | 0.48  | 0.90 | 0.05 ns  |
| Cbr1          | carbonyl reductase 1                                                                | 12408  | 0.70  | 0.67  | 0.73  | 0.96 | -0.59 ns |
| Psmb3         |                                                                                     | 26446  | 4.91  | 4.44  | 4.21  | 1.16 | 0.36 ns  |
| EG668829      |                                                                                     | 668829 | 24.01 | 22.91 | 21.67 | 1.10 | 0.21 ns  |
| Rpl24         |                                                                                     | 68193  | 24.01 | 22.91 | 21.67 | 1.10 | 0.21 ns  |
| Itp1          | inositol 1,4,5-triphosphate receptor 1                                              | 16438  | 0.49  | 0.38  | 0.20  | 2.47 | 0.49 ns  |
| Tec           | cytoplasmic tyrosine kinase, Dscr28C related (Drosophila)                           | 21682  | 0.40  | 0.46  | 0.41  | 0.96 | 0.00 ns  |
| Dcackd        | dephospho-CoA kinase domain containing                                              | 68087  | 0.92  | 0.87  | 0.89  | 1.02 | 0.18 ns  |
| Pkd1          | polycystic kidney disease 1 homolog                                                 | 18763  | 0.33  | 0.42  | 0.22  | 1.50 | 0.61 ns  |
| Kdelr1        | KDEL (Lys-Asp-Glu-Leu) endoplasmic reticulum protein retention receptor 1           | 68137  | 1.77  | 1.92  | 2.57  | 0.69 | -0.88 *  |
| Acads         | acyl-Coenzyme A dehydrogenase, short chain                                          | 11409  | 0.67  | 0.58  | 0.73  | 0.91 | -0.45 ns |
| Csf1          | colony stimulating factor 1 (macrophage)                                            | 12977  | 0.35  | 0.54  | 0.45  | 0.76 | -0.66 ns |
| Sh3bp1        | SH3-domain binding protein 1                                                        | 20401  | 0.37  | 0.31  | 0.36  | 1.01 | -0.03 ns |
| Snx2          | sorting nexin 2                                                                     | 67804  | 1.71  | 1.52  | 2.29  | 0.74 | -0.58 ns |

|               |                                                                                                                                                                                                                            |        |       |       |       |      |          |
|---------------|----------------------------------------------------------------------------------------------------------------------------------------------------------------------------------------------------------------------------|--------|-------|-------|-------|------|----------|
| Timp1         | tissue inhibitor of metalloproteinase 1                                                                                                                                                                                    | 21857  | 0.31  | 0.31  | 0.59  | 0.53 | -0.47 ns |
| Wdr81         | WD repeat domain 81                                                                                                                                                                                                        | 192652 | 0.53  | 0.48  | 0.32  | 1.66 | 0.45 ns  |
| Msln          | mesothelin                                                                                                                                                                                                                 | 56047  | 1.78  | 2.02  | 1.94  | 0.91 | 0.24 ns  |
| Spltc2        | serine palmitoyltransferase, long chain base subunit 2                                                                                                                                                                     | 20773  | 1.55  | 1.56  | 1.73  | 0.89 | -0.94 ** |
| Mecp2         | methyl CpG binding protein 2                                                                                                                                                                                               | 17257  | 0.40  | 0.43  | 0.59  | 0.67 | -0.31 ns |
| Lnx2          | ligand of numb-protein X 2                                                                                                                                                                                                 | 140887 | 0.46  | 0.43  | 0.44  | 1.03 | -0.41 ns |
| Cmtm7         | CKLF-like MARVEL transmembrane domain containing 7                                                                                                                                                                         | 102545 | 0.49  | 0.46  | 0.20  | 2.44 | 0.90 *   |
| Kpna1         | karyopherin (importin) alpha 1                                                                                                                                                                                             | 16646  | 0.78  | 0.97  | 0.93  | 0.84 | -0.45 ns |
| 1700037H04Rik | RIKEN cDNA 1700037H04 gene                                                                                                                                                                                                 | 67326  | 1.18  | 1.31  | 1.46  | 0.80 | 0.07 ns  |
| Gpr175        | G protein-coupled receptor 175                                                                                                                                                                                             | 24100  | 0.52  | 0.41  | 0.57  | 0.91 | -0.09 ns |
| Ppp4c         | protein phosphatase 4, catalytic subunit                                                                                                                                                                                   | 56420  | 2.33  | 2.29  | 2.83  | 0.82 | -0.27 ns |
| Ict1          | immature colon carcinoma transcript 1                                                                                                                                                                                      | 68572  | 1.77  | 1.81  | 1.89  | 0.93 | 0.34 ns  |
| Tbk1          | TANK-binding kinase 1                                                                                                                                                                                                      | 56480  | 1.72  | 1.60  | 1.69  | 1.01 | 0.14 ns  |
| Tars          | threonyl-tRNA synthetase                                                                                                                                                                                                   | 110960 | 1.94  | 1.95  | 1.73  | 1.11 | 0.78 ns  |
| Pik3ca        | phosphatidylinositol 3-kinase, catalytic, alpha polypeptide                                                                                                                                                                | 18706  | 1.26  | 1.09  | 1.23  | 1.02 | -0.04 ns |
| LOC675709     | similar to Beta-1,4-galactosyltransferase 6 (Beta-1,4-GalTase 6) (Beta4Gal-T6) (b4Gal-T6) (UDP-galactose:beta-N-acetylglucosamine beta-1,4-galactosyltransferase 6) (UDP-Gal:beta-GlcNAc beta-1,4-galactosyltransferase 6) | 675709 | 0.68  | 0.86  | 0.64  | 1.06 | 0.45 ns  |
| Anxa3         | annexin A3                                                                                                                                                                                                                 | 11745  | 5.69  | 6.54  | 7.02  | 0.81 | -0.84 *  |
| Dbnl          | drebrin-like                                                                                                                                                                                                               | 13169  | 0.99  | 1.11  | 1.23  | 0.80 | -0.37 ns |
| Sh3kbp1       | SH3-domain kinase binding protein 1                                                                                                                                                                                        | 58194  | 0.25  | 0.35  | 0.70  | 0.36 | -0.39 ns |
| Crlf3         | cytokine receptor-like factor 3                                                                                                                                                                                            | 54394  | 0.56  | 0.72  | 0.76  | 0.73 | -0.91 *  |
| PsmA4         | proteasome (prosome, macropain) subunit, alpha type 4                                                                                                                                                                      | 26441  | 3.52  | 2.93  | 2.97  | 1.18 | 0.74 ns  |
| Plekha2       | pleckstrin homology domain containing, family B (evectins) member 2                                                                                                                                                        | 226971 | 1.85  | 1.77  | 1.54  | 1.20 | 0.09 ns  |
| Arsa          | arylsulfatase A                                                                                                                                                                                                            | 11883  | 0.98  | 1.24  | 1.24  | 0.78 | -0.80 ns |
| Mad2l2        | MAD2 mitotic arrest deficient-like 2 (yeast)                                                                                                                                                                               | 71890  | 0.43  | 0.51  | 0.68  | 0.63 | -0.94 ** |
| Prr14         | proline rich 14                                                                                                                                                                                                            | 233895 | 0.60  | 0.70  | 0.72  | 0.82 | -0.68 ns |
| Osbp          | oxysterol binding protein                                                                                                                                                                                                  | 76303  | 2.11  | 1.80  | 1.33  | 1.58 | 0.91 *   |
| S100a11       | S100 calcium binding protein A11 (calgizzarin)                                                                                                                                                                             | 20195  | 20.33 | 17.96 | 15.25 | 1.33 | 0.77 ns  |
| Pik3r4        | phosphatidylinositol 3 kinase, regulatory subunit, polypeptide 4, p150                                                                                                                                                     | 75669  | 0.42  | 0.49  | 0.56  | 0.74 | -0.71 ns |
| Nudt22        | nudix (nucleoside diphosphate linked moiety X)-type motif 22                                                                                                                                                               | 68323  | 0.91  | 0.69  | 0.48  | 1.90 | 0.98 *** |
| 5033414D02Rik | RIKEN cDNA 5033414D02 gene                                                                                                                                                                                                 | 67759  | 0.97  | 1.33  | 0.99  | 0.97 | 0.25 ns  |
| 2410001C21Rik | RIKEN cDNA 2410001C21 gene                                                                                                                                                                                                 | 66404  | 0.89  | 0.90  | 1.10  | 0.81 | -0.88 *  |
| Eml3          | echinoderm microtubule associated protein like 3                                                                                                                                                                           | 225898 | 0.99  | 1.11  | 0.75  | 1.32 | 0.55 ns  |
| Hbp1          | high mobility group box transcription factor 1                                                                                                                                                                             | 73389  | 2.56  | 2.33  | 2.45  | 1.04 | -0.21 ns |
| Hoxb4         | homeo box B4                                                                                                                                                                                                               | 15412  | 0.59  | 0.38  | 0.34  | 1.71 | 0.44 ns  |
| Cdk8          | cyclin-dependent kinase 8                                                                                                                                                                                                  | 264064 | 1.39  | 1.34  | 1.73  | 0.80 | -0.87 *  |
| Inpp1         | inositol polyphosphate phosphatase-like 1                                                                                                                                                                                  | 16332  | 0.60  | 0.55  | 0.62  | 0.96 | -0.18 ns |
| Nudcd3        | NudC domain containing 3                                                                                                                                                                                                   | 209586 | 1.31  | 1.10  | 1.55  | 0.84 | -0.31 ns |
| Phf8          | PHD finger protein 8                                                                                                                                                                                                       | 320595 | 0.50  | 0.58  | 0.66  | 0.75 | 0.10 ns  |
| Edem3         | ER degradation enhancer, mannosidase alpha-like 3                                                                                                                                                                          | 66967  | 1.17  | 1.24  | 1.08  | 1.08 | -0.12 ns |
| Brpf1         | bromodomain and PHD finger containing, 1                                                                                                                                                                                   | 78783  | 0.95  | 0.89  | 1.00  | 0.94 | -0.62 ns |
| Psp1          | PC4 and SFRS1 interacting protein 1                                                                                                                                                                                        | 101739 | 1.42  | 1.36  | 1.61  | 0.88 | -0.71 ns |
| AI427122      | expressed sequence AI427122                                                                                                                                                                                                | 102502 | 0.62  | 0.57  | 0.77  | 0.80 | -0.07 ns |
| Cpt1a         | carnitine palmitoyltransferase 1a, liver                                                                                                                                                                                   | 12894  | 2.49  | 1.89  | 2.24  | 1.10 | 0.15 ns  |
| Tmem160       | transmembrane protein 160                                                                                                                                                                                                  | 69094  | 0.59  | 0.66  | 0.70  | 0.84 | -0.38 ns |
| Ankrd13a      | ankyrin repeat domain 13a                                                                                                                                                                                                  | 68420  | 1.82  | 1.87  | 2.17  | 0.84 | -0.83 *  |
| Cdc5l         | cell division cycle 5-like (S. pombe)                                                                                                                                                                                      | 71702  | 3.37  | 3.19  | 2.23  | 1.50 | 0.92 **  |
| Gcnt1         | glucosaminyl (N-acetyl) transferase 1, core 2                                                                                                                                                                              | 14537  | 1.71  | 1.97  | 1.08  | 1.58 | 0.39 ns  |
| 1500002O20Rik | RIKEN cDNA 1500002O20 gene                                                                                                                                                                                                 | 71997  | 0.39  | 0.33  | 0.38  | 1.00 | -0.42 ns |
| Ndst1         | N-deacetylase/N-sulfotransferase (heparan glucosaminyl) 1                                                                                                                                                                  | 15531  | 2.47  | 3.01  | 2.62  | 0.94 | 0.30 ns  |
| Wrb           | tryptophan rich basic protein                                                                                                                                                                                              | 71446  | 0.70  | 0.69  | 0.63  | 1.11 | -0.01 ns |
| Mospd3        | motile sperm domain containing 3                                                                                                                                                                                           | 68929  | 0.36  | 0.45  | 0.32  | 1.10 | -0.02 ns |
| Tagap         | T-cell activation Rho GTPase-activating protein                                                                                                                                                                            | 72536  | 0.90  | 0.74  | 0.41  | 2.18 | 0.79 ns  |
| Paqr5         | progesterin and adipoQ receptor family member V                                                                                                                                                                            | 74090  | 1.37  | 0.97  | 1.24  | 1.10 | 0.46 ns  |
| Med18         | mediator of RNA polymerase II transcription, subunit 18 homolog (yeast)                                                                                                                                                    | 67219  | 0.41  | 0.35  | 0.44  | 0.93 | 0.05 ns  |
| Coq10b        | coenzyme Q10 homolog B (S. cerevisiae)                                                                                                                                                                                     | 67876  | 0.71  | 0.82  | 0.82  | 0.86 | -0.59 ns |
| Mettl5        | methyltransferase like 5                                                                                                                                                                                                   | 75422  | 1.04  | 1.03  | 0.86  | 1.20 | 0.29 ns  |
| Mdm4          | transformed mouse 3T3 cell double minute 4                                                                                                                                                                                 | 17248  | 0.71  | 0.64  | 0.60  | 1.18 | -0.07 ns |
| Rpl37a        | ribosomal protein L37a                                                                                                                                                                                                     | 19981  | 24.25 | 22.41 | 15.45 | 1.56 | 0.80 ns  |
| Thrap3        | thyroid hormone receptor associated protein 3                                                                                                                                                                              | 230753 | 2.20  | 2.18  | 2.75  | 0.80 | -0.60 ns |
| Eral1         | Era (G-protein)-like 1 (E. coli)                                                                                                                                                                                           | 57837  | 1.18  | 1.20  | 0.97  | 1.21 | 0.39 ns  |
| Mttr11        | myotubularin related protein 11                                                                                                                                                                                            | 194126 | 0.28  | 0.43  | 0.37  | 0.74 | -0.37 ns |
| Ascc3l1       | activating signal cointegrator 1 complex subunit 3-like 1                                                                                                                                                                  | 320632 | 2.84  | 2.59  | 2.28  | 1.24 | 0.72 ns  |
| 6330500D04Rik | RIKEN cDNA 6330500D04 gene                                                                                                                                                                                                 | 193385 | 0.40  | 0.35  | 0.53  | 0.75 | -0.32 ns |
| Supv3l1       | suppressor of var1, 3-like 1 (S. cerevisiae)                                                                                                                                                                               | 338359 | 0.57  | 0.62  | 0.70  | 0.81 | -0.56 ns |
| Ccdc32        | coiled-coil domain containing 32                                                                                                                                                                                           | 269336 | 0.48  | 0.38  | 0.42  | 1.15 | 0.05 ns  |
| Sepw1         | selenoprotein W, muscle 1                                                                                                                                                                                                  | 20364  | 5.63  | 5.04  | 4.59  | 1.22 | 0.83 *   |
| Slc41a1       | solute carrier family 41, member 1                                                                                                                                                                                         | 98396  | 0.46  | 0.52  | 0.45  | 1.02 | 0.36 ns  |
| Cldn3         | claudin 3                                                                                                                                                                                                                  | 12739  | 7.35  | 6.83  | 5.63  | 1.30 | 0.76 ns  |
| Dicer1        | Dicer1, Dcr-1 homolog (Drosophila)                                                                                                                                                                                         | 192119 | 1.03  | 0.87  | 0.89  | 1.14 | 0.59 ns  |
| AI848100      | expressed sequence AI848100                                                                                                                                                                                                | 226551 | 3.51  | 2.93  | 2.48  | 1.41 | 0.57 ns  |
| Eif2a         | eukaryotic translation initiation factor 2a                                                                                                                                                                                | 229317 | 1.24  | 1.37  | 1.31  | 0.94 | -0.31 ns |
| Exoc6         | exocyst complex component 6                                                                                                                                                                                                | 107371 | 0.66  | 0.63  | 0.46  | 1.42 | 0.67 ns  |
| EG668182      |                                                                                                                                                                                                                            | 668182 | 21.71 | 21.72 | 17.61 | 1.23 | 0.57 ns  |
| LOC675192     |                                                                                                                                                                                                                            | 675192 | 21.71 | 21.72 | 17.61 | 1.23 | 0.57 ns  |
| Hispd2a       | histidine acid phosphatase domain containing 2A                                                                                                                                                                            | 327655 | 0.74  | 0.52  | 0.62  | 1.20 | 0.17 ns  |
| Megf8         | multiple EGF-like-domains 8                                                                                                                                                                                                | 269878 | 0.60  | 0.71  | 0.57  | 1.05 | 0.15 ns  |
| Susd4         | sushi domain containing 4                                                                                                                                                                                                  | 96935  | 1.10  | 1.17  | 0.90  | 1.21 | 0.62 ns  |
| Gmppa         | GDP-mannose pyrophosphorylase A                                                                                                                                                                                            | 69080  | 0.79  | 0.88  | 0.76  | 1.03 | 0.12 ns  |
| Asx12         | Additional sex combs like 2 (Drosophila)                                                                                                                                                                                   | 75302  | 0.82  | 0.87  | 1.22  | 0.67 | -0.74 ns |
| LOC245350     | similar to ubiquitin-conjugating enzyme E2Q (putative) 2                                                                                                                                                                   | 245350 | 0.27  | 0.27  | 0.27  | 0.98 | 0.03 ns  |
| Samd9l        | sterile alpha motif domain containing 9-like                                                                                                                                                                               | 209086 | 3.44  | 3.67  | 4.58  | 0.75 | -0.53 ns |
| Mier3         | mesoderm induction early response 1, family member 3                                                                                                                                                                       | 218613 | 0.67  | 0.89  | 0.82  | 0.82 | -0.05 ns |
| Nt5dc1        | 5'-nucleotidase domain containing 1                                                                                                                                                                                        | 319638 | 0.58  | 0.55  | 0.38  | 1.52 | 0.16 ns  |

|               |                                                                                                                          |        |      |      |      |      |          |
|---------------|--------------------------------------------------------------------------------------------------------------------------|--------|------|------|------|------|----------|
| Ogt           | O-linked N-acetylglucosamine (GlcNAc) transferase (UDP-N-acetylglucosamine:polypeptide-N-acetylglucosaminyl transferase) | 108155 | 1.84 | 1.77 | 2.55 | 0.72 | -0.69 ns |
| Ralgds        | ral guanine nucleotide dissociation stimulator                                                                           | 19730  | 0.42 | 0.32 | 0.37 | 1.13 | 0.53 ns  |
| Pfdn5         | prefoldin 5                                                                                                              | 56612  | 5.90 | 5.93 | 6.14 | 0.96 | 0.14 ns  |
| Yars          | tyrosyl-tRNA synthetase                                                                                                  | 107271 | 0.62 | 0.62 | 0.64 | 0.96 | -0.70 ns |
| 2310022K01Rik |                                                                                                                          | 71909  | 0.33 | 0.32 | 0.44 | 0.75 | -0.72 ns |
| Traf4         | Tnf receptor associated factor 4                                                                                         | 22032  | 0.67 | 0.77 | 0.50 | 1.34 | 0.15 ns  |
| Ell           | elongation factor RNA polymerase II                                                                                      | 13716  | 0.51 | 0.43 | 0.42 | 1.19 | 0.79 ns  |
| Bckdk         | branched chain ketoacid dehydrogenase kinase                                                                             | 12041  | 0.73 | 0.70 | 0.85 | 0.85 | -0.55 ns |
| Chordc1       | cysteine and histidine-rich domain (CHORD)-containing, zinc-binding protein 1                                            | 66917  | 2.32 | 1.76 | 0.77 | 2.99 | 0.96 **  |
| Nr2f6         | nuclear receptor subfamily 2, group F, member 6                                                                          | 13864  | 2.04 | 2.21 | 1.87 | 1.08 | 0.61 ns  |
| Esrra         | estrogen related receptor, alpha                                                                                         | 26379  | 0.51 | 0.46 | 0.46 | 1.10 | 0.07 ns  |
| Sft2d1        |                                                                                                                          | 106489 | 0.96 | 0.84 | 0.66 | 1.46 | 0.70 ns  |
| Wnt10a        | wingless related MMTV integration site 10a                                                                               | 22409  | 0.69 | 0.90 | 0.48 | 1.42 | 0.47 ns  |
| Rer1          | RER1 retention in endoplasmic reticulum 1 homolog (S. cerevisiae)                                                        | 67830  | 0.75 | 0.65 | 0.81 | 0.92 | -0.39 ns |
| Ilf3          | interleukin enhancer binding factor 3                                                                                    | 16201  | 1.92 | 1.73 | 1.50 | 1.27 | 0.88 *   |
| Gpx1          | glutathione peroxidase 1                                                                                                 | 14775  | 5.19 | 4.45 | 4.50 | 1.15 | 0.38 ns  |
| Paqr7         | progesterin and adipoQ receptor family member VII                                                                        | 71904  | 0.31 | 0.38 | 0.38 | 0.81 | -0.77 ns |
| Igsf8         | immunoglobulin superfamily, member 8                                                                                     | 140559 | 1.15 | 1.03 | 1.15 | 1.00 | 0.46 ns  |
| Josd1         | Josephin domain containing 1                                                                                             | 74158  | 1.77 | 1.63 | 1.98 | 0.89 | 0.10 ns  |
| Spats2        | spermatogenesis associated, serine-rich 2                                                                                | 72572  | 1.53 | 1.43 | 1.47 | 1.04 | 0.39 ns  |
| Tm7sf2        | transmembrane 7 superfamily member 2                                                                                     | 73166  | 0.45 | 0.33 | 0.29 | 1.54 | 0.81 ns  |
| BC003940      | cDNA sequence BC003940                                                                                                   | 192173 | 0.81 | 0.88 | 0.96 | 0.84 | 0.06 ns  |
| Zfp598        | zinc finger protein 598                                                                                                  | 213753 | 1.11 | 1.08 | 1.01 | 1.10 | 0.65 ns  |
| Ehmt2         | euchromatic histone lysine N-methyltransferase 2                                                                         | 110147 | 3.81 | 3.58 | 2.89 | 1.31 | 0.90 *   |
| Svil          | supervillin                                                                                                              | 225115 | 0.59 | 0.76 | 0.69 | 0.85 | -0.05 ns |
| 201011101Rik  | RIKEN cDNA 201011101 gene                                                                                                | 72061  | 0.91 | 0.75 | 0.58 | 1.56 | 0.63 ns  |
| 2610209M04Rik | RIKEN cDNA 2610209M04 gene                                                                                               | 66618  | 3.33 | 3.53 | 4.41 | 0.75 | -0.40 ns |
| Sec11c        | SEC11 homolog C (S. cerevisiae)                                                                                          | 66286  | 0.34 | 0.55 | 0.68 | 0.50 | -0.61 ns |
| Mrp152        | mitochondrial ribosomal protein L52                                                                                      | 68836  | 1.95 | 2.21 | 1.97 | 0.99 | 0.09 ns  |
| Triap1        | TP53 regulated inhibitor of apoptosis 1                                                                                  | 69076  | 0.52 | 0.44 | 0.58 | 0.90 | 0.16 ns  |
| Ascc1         | activating signal cointegrator 1 complex subunit 1                                                                       | 69090  | 0.82 | 0.83 | 0.70 | 1.17 | 0.33 ns  |
| Rfng          | radical fringe gene homolog (Drosophila)                                                                                 | 19719  | 0.48 | 0.46 | 0.49 | 0.97 | 0.45 ns  |
| Cdc42         | cell division cycle 42 homolog (S. cerevisiae)                                                                           | 12540  | 4.92 | 4.54 | 5.20 | 0.94 | -0.48 ns |
| 4930461P20Rik | RIKEN cDNA 4930461P20 gene                                                                                               | 78244  | 0.87 | 0.83 | 1.25 | 0.69 | -0.44 ns |
| BC048355      | cDNA sequence BC048355                                                                                                   | 381101 | 0.59 | 0.66 | 0.35 | 1.65 | 0.82 *   |
| Cbfb          | core binding factor beta                                                                                                 | 12400  | 5.44 | 4.16 | 5.34 | 1.01 | 0.32 ns  |
| Mtch1         | mitochondrial carrier homolog 1 (C. elegans)                                                                             | 56462  | 2.74 | 2.41 | 1.38 | 1.97 | 0.96 **  |
| Trpc4ap       | transient receptor potential cation channel, subfamily C, member 4 associated protein                                    | 56407  | 1.41 | 1.08 | 1.36 | 1.03 | 0.29 ns  |
| Adss          | adenylosuccinate synthetase, non muscle                                                                                  | 11566  | 3.67 | 3.72 | 2.70 | 1.36 | 0.49 ns  |
| Ing4          | inhibitor of growth family, member 4                                                                                     | 28019  | 0.74 | 0.67 | 0.78 | 0.95 | -0.23 ns |
| Eif2b1        | eukaryotic translation initiation factor 2B, subunit 1 (alpha)                                                           | 209354 | 0.68 | 0.75 | 0.87 | 0.79 | -0.72 ns |
| Ppl           | periplakin                                                                                                               | 19041  | 1.78 | 1.84 | 2.13 | 0.83 | -0.88 *  |
| A230054D04Rik | RIKEN cDNA A230054D04 gene                                                                                               | 665775 | 0.47 | 0.44 | 0.47 | 1.00 | 0.48 ns  |
| Zmiz2         | zinc finger, MIZ-type containing 2                                                                                       | 52915  | 0.56 | 0.61 | 0.61 | 0.91 | -0.35 ns |
| D17Wsu92e     | DNA segment, Chr 17, Wayne State University 92, expressed                                                                | 224647 | 0.76 | 0.74 | 0.58 | 1.31 | 0.88 *   |
| Alg3          | asparagine-linked glycosylation 3 homolog (yeast, alpha-1,3-mannosyltransferase)                                         | 208624 | 0.50 | 0.49 | 0.49 | 1.03 | 0.51 ns  |
