# Supplementary material
Source: PubMed Central journal article supplement (PMC2650175)
Supplement: 0813002106_ST2_PDF.pdf [file 0813002106_ST2_PDF.pdf]

**Table S2. Transcriptional regulators common to mpkCCD and IMCD cells with previously reported roles in AQP2 transcriptional regulation, but not identified as conserved motifs in Genomatix analysis (Fig. 1)**

| Gene symbol                                | Gene name                                                                     | Ratio (11/2) | Correlation coefficient | p value | mpkCCD signal | IMCD signal |
|--------------------------------------------|-------------------------------------------------------------------------------|--------------|-------------------------|---------|---------------|-------------|
| <b>AP1 (activating protein 1)</b>          |                                                                               |              |                         |         |               |             |
| Jund1                                      | Jun proto-oncogene related gene d1                                            | 0.80         | -0.48                   | 0.34    | 6.51          | 22.05       |
| Jun                                        | Jun oncogene                                                                  | 1.01         | -0.41                   | 0.41    | 2.52          | 33.72       |
| Junb                                       | Jun-B oncogene                                                                | 1.42         | 0.90                    | 0.01*   | 1.22          | 12.66       |
| Fos                                        | FBJ osteosarcoma oncogene                                                     | 0.87         | -0.59                   | 0.22    | 1.21          | 35.64       |
| Fosl2                                      | fos-like antigen 2                                                            | 0.58         | -0.92                   | 0.01*   | 0.72          | 1.90        |
| Fosl1                                      | fos-like antigen 1                                                            | 0.93         | 0.37                    | 0.47    | 0.42          | 5.99        |
| <b>NFKB (nuclear factor kappa B/c-rel)</b> |                                                                               |              |                         |         |               |             |
| Rela                                       | v-rel reticuloendotheliosis viral oncogene homolog A                          | 1.58         | 0.97                    | 0.00*   | 4.43          | 2.29        |
| Nfkb1                                      | nuclear factor of kappa light chain gene enhancer in B-cells 1 p105           | 1.21         | 0.81                    | 0.04*   | 1.12          | 2.21        |
| Nfkb2                                      | nuclear factor of kappa light polypeptide gene enhancer in B-cells 2 p49/p100 | 0.86         | 0.33                    | 0.52    | 0.74          | 1.18        |
| <b>SP1 (GC-Box factors SP1/GC)</b>         |                                                                               |              |                         |         |               |             |
| Sp1                                        | trans-acting transcription factor 1                                           | 1.09         | 0.59                    | 0.22    | 5.16          | 2.19        |
| Klf9                                       | Kruppel-like factor 9                                                         | 1.58         | 0.90                    | 0.01*   | 1.75          | 9.44        |
| Klf10                                      | Kruppel-like factor 10                                                        | 0.70         | -0.29                   | 0.58    | 0.97          | 14.99       |

\* significance test for correlation ( $p < 0.05$ ).
