# Supplementary material
Source: PubMed Central journal article supplement (PMC2650175)
Supplement: 0813002106_ST3_PDF.pdf [file 0813002106_ST3_PDF.pdf]

Table S3. Rat Kidney Proximal Tubule Transcriptome

| Gene Title                                                                                                                            | Gene Symbol                    | Signal     |
|---------------------------------------------------------------------------------------------------------------------------------------|--------------------------------|------------|
| 1-acylglycerol-3-phosphate O-acyltransferase 3 (predicted)                                                                            | Agpat3_predicted               | 2.39±0.16  |
| 1-acylglycerol-3-phosphate O-acyltransferase 5 (lysophosphatidic acid acyltransferase, epsilon) (predicted)                           | Agpat5_predicted               | 1.03±0.1   |
| 1-acylglycerol-3-phosphate O-acyltransferase 6 (lysophosphatidic acid acyltransferase, zeta)                                          | Agpat6                         | 3.13±0.26  |
| 2,3-bisphosphoglycerate mutase                                                                                                        | Bpgm                           | 1.65±0.09  |
| 2,4-dienoyl CoA reductase 1, mitochondrial                                                                                            | Decr1                          | 18.38±0.84 |
| 24-dehydrocholesterol reductase                                                                                                       | Dhcr24                         | 7.07±0.94  |
| 2-4-dienoyl-Coenzyme A reductase 2, peroxisomal                                                                                       | Decr2                          | 32.98±3.02 |
| 2-4-dienoyl-Coenzyme A reductase 2, peroxisomal /// similar to mKIAA0665 protein                                                      | Decr2 /// RGD1308952           | 12.38±0.89 |
| 2-hydroxyacyl-CoA lyase 1                                                                                                             | Hacl1                          | 3.82±0.38  |
| 2-oxoglutarate and iron-dependent oxygenase domain containing 1                                                                       | Ogfd1                          | 0.42±0.09  |
| 3-hydroxy-3-methylglutaryl-Coenzyme A lyase                                                                                           | Hmgcl                          | 5.61±0.67  |
| 3-hydroxy-3-methylglutaryl-Coenzyme A reductase                                                                                       | Hmgcr                          | 2.85±0.8   |
| 3-hydroxy-3-methylglutaryl-Coenzyme A synthase 1                                                                                      | Hmgcs1                         | 2.93±0.41  |
| 3-hydroxy-3-methylglutaryl-Coenzyme A synthase 2                                                                                      | Hmgcs2                         | 1.85±0.37  |
| 3-hydroxyanthranilate 3,4-dioxygenase                                                                                                 | Haao                           | 5.83±2.68  |
| 3-hydroxybutyrate dehydrogenase, type 2 (predicted)                                                                                   | Bdh2_predicted                 | 15.79±2.81 |
| 3-hydroxyisobutyrate dehydrogenase                                                                                                    | Hibadh                         | 37.93±1.24 |
| 3-hydroxyisobutyryl-Coenzyme A hydrolase                                                                                              | Hibch                          | 4.13±0.08  |
| 3-ketodihydrospingosine reductase                                                                                                     | Kdsr                           | 0.35±0.06  |
| 3-oxoacyl-ACP synthase, mitochondrial                                                                                                 | Oxsm                           | 1.11±0.12  |
| 3'-phosphoadenosine 5'-phosphosulfate synthase 1 (predicted)                                                                          | Papss1_predicted               | 14.81±2.08 |
| 3'-phosphoadenosine 5'-phosphosulfate synthase 2 (predicted)                                                                          | Papss2_predicted               | 1.2±0.1    |
| 3-phosphoglycerate dehydrogenase                                                                                                      | Phgdh                          | 22.31±2.41 |
| 3-phosphoinositide dependent protein kinase-1                                                                                         | Pdpk1                          | 2.52±0.34  |
| 4-aminobutyrate aminotransferase                                                                                                      | Abat                           | 5.7±0.25   |
| 4-hydroxyphenylpyruvic acid dioxygenase                                                                                               | Hpd                            | 65.65±3.62 |
| 4-nitrophenylphosphatase domain and non-neuronal SNAP25-like protein homolog 1 (C. elegans)                                           | Nipsnap1                       | 20.97±1.01 |
| 5' nucleotidase, ecto                                                                                                                 | Nt5e                           | 9.35±0.95  |
| 5, 10-methylenetetrahydrofolate synthetase                                                                                            | Mthfs                          | 5.11±0.59  |
| 5,10-methylenetetrahydrofolate reductase                                                                                              | Mthfr                          | 0.46±0.11  |
| 5'-3' exoribonuclease 1 (predicted)                                                                                                   | Xrn1_predicted                 | 0.4±0.08   |
| 5'-3' exoribonuclease 2 (predicted)                                                                                                   | Xrn2_predicted                 | 6.29±0.65  |
| 5-aminoimidazole-4-carboxamide ribonucleotide formyltransferase/IMP cyclohydrolase                                                    | Atic                           | 3.89±0.38  |
| 5-azacytidine induced gene 2                                                                                                          | Azi2                           | 1.28±0.3   |
| 5-methyltetrahydrofolate-homocysteine methyltransferase                                                                               | Mtr                            | 0.69±0.05  |
| 5-methyltetrahydrofolate-homocysteine methyltransferase reductase                                                                     | Mtrr                           | 1.85±0.2   |
| 5'-nucleotidase domain containing 1 (predicted)                                                                                       | Nt5dc1_predicted               | 2.17±0.33  |
| 5'-nucleotidase domain containing 2                                                                                                   | Nt5dc2                         | 0.22±0.03  |
| 5'-nucleotidase, cytosolic III (predicted)                                                                                            | Nt5c3_predicted                | 3.44±0.28  |
| 5'-nucleotidase, cytosolic III-like                                                                                                   | Nt5c3l                         | 1.44±0.14  |
| 5-oxoprolinase (ATP-hydrolyzing)                                                                                                      | Oplah                          | 12.18±1.87 |
| 6-phosphogluconolactonase (predicted)                                                                                                 | Pgls_predicted                 | 2.44±0.64  |
| 6-pyruvoyl-tetrahydropterin synthase                                                                                                  | Pts                            | 1.36±0.34  |
| 7-dehydrocholesterol reductase                                                                                                        | Dhcr7                          | 3.35±0.39  |
| 92Aa-Protein                                                                                                                          | LOC494529                      | 2.03±0.18  |
| a disintegrin and metallopeptidase domain 10                                                                                          | Adam10                         | 0.97±0.16  |
| a disintegrin and metallopeptidase domain 17                                                                                          | Adam17                         | 0.69±0.32  |
| a disintegrin and metallopeptidase domain 9 (meltrin gamma)                                                                           | Adam9                          | 3.72±0.3   |
| a disintegrin and metalloprotease domain 4                                                                                            | Adam4                          | 0.23±0.07  |
| a disintegrin-like and metallopeptidase (reprolysin type) with thrombospondin type 1 motif, 1                                         | Adamts1                        | 0.39±0.27  |
| A kinase (PRKA) anchor protein (yotiao) 9                                                                                             | Akap9                          | 2.2±0.34   |
| A kinase (PRKA) anchor protein 1                                                                                                      | Akap1                          | 7.64±0.62  |
| A kinase (PRKA) anchor protein 10 (predicted)                                                                                         | Akap10_predicted               | 1.55±0.27  |
| A kinase (PRKA) anchor protein 11                                                                                                     | Akap11                         | 2.85±0.09  |
| A kinase (PRKA) anchor protein 2                                                                                                      | Akap2                          | 11.01±0.57 |
| A kinase (PRKA) anchor protein 7                                                                                                      | Akap7                          | 0.87±0.28  |
| A kinase (PRKA) anchor protein 8                                                                                                      | Akap8                          | 1.92±0.2   |
| A kinase (PRKA) anchor protein 8-like                                                                                                 | Akap8l                         | 0.68±0.1   |
| aarF domain containing kinase 2 (predicted)                                                                                           | Adck2_predicted                | 0.59±0.05  |
| aarF domain containing kinase 4                                                                                                       | Adck4                          | 0.84±0.19  |
| aarF domain containing kinase 5                                                                                                       | Adck5                          | 2.08±0.16  |
| Abelson helper integration site 1                                                                                                     | Ahi1                           | 0.48±0.11  |
| abhydrolase domain containing 1                                                                                                       | Abhd1                          | 2.98±0.58  |
| abhydrolase domain containing 10                                                                                                      | Abhd10                         | 0.4±0.06   |
| abhydrolase domain containing 11 /// similar to abhydrolase domain containing 11                                                      | Abhd11 /// LOC686139           | 1.81±0.2   |
| abhydrolase domain containing 12                                                                                                      | Abhd12                         | 0.31±0.23  |
| abhydrolase domain containing 13                                                                                                      | Abhd13                         | 1.35±0.09  |
| abhydrolase domain containing 14A                                                                                                     | Abhd14a                        | 2±0.59     |
| abhydrolase domain containing 14b                                                                                                     | Abhd14b                        | 18.32±1.8  |
| abhydrolase domain containing 3 (predicted)                                                                                           | Abhd3_predicted                | 6.9±0.03   |
| abhydrolase domain containing 4 (predicted)                                                                                           | Abhd4_predicted                | 4.37±0.62  |
| abhydrolase domain containing 6                                                                                                       | Abhd6                          | 3.68±0.75  |
| abhydrolase domain containing 8 (predicted)                                                                                           | Abhd8_predicted                | 0.69±0.07  |
| abl-interactor 1                                                                                                                      | Abi1                           | 2.64±0.21  |
| abl-interactor 2                                                                                                                      | Abi2                           | 1.36±0.24  |
| Ac1254                                                                                                                                | LOC362901                      | 9.12±0.37  |
| acetyl-coenzyme A acetyltransferase 1                                                                                                 | Acat1                          | 25.91±1.26 |
| acetyl-Coenzyme A acetyltransferase 2                                                                                                 | Acat2                          | 3.3±0.28   |
| acetyl-Coenzyme A acyltransferase 1 /// similar to 3-ketoacyl-CoA thiolase B, peroxisomal precursor (Beta-ketothiolase B) (predicted) | Acaa1 /// RGD1562373 predicted | 21.64±1.87 |
| acetyl-Coenzyme A acyltransferase 2 (mitochondrial 3-oxoacyl-Coenzyme A thiolase)                                                     | Acaa2                          | 36.61±2.72 |
| acetyl-coenzyme A carboxylase alpha                                                                                                   | Acaca                          | 1.1±0.31   |
| acetylserotonin O-methyltransferase-like (predicted)                                                                                  | Asmtl_predicted                | 1.28±0.24  |
| achalasia, adrenocortical insufficiency, alacrimia                                                                                    | Aaas                           | 0.2±0.07   |
| acid phosphatase 1, soluble                                                                                                           | Acp1                           | 12.59±1.17 |

|                                                                                                                                |                         |            |
|--------------------------------------------------------------------------------------------------------------------------------|-------------------------|------------|
| acid phosphatase 2, lysosomal                                                                                                  | Acp2                    | 7.98±1.18  |
| acid phosphatase 5, tartrate resistant                                                                                         | Acp5                    | 7.91±0.64  |
| acid phosphatase 6, lysophosphatidic                                                                                           | Acp6                    | 0.56±0.1   |
| acid phosphatase-like 2                                                                                                        | Acp12                   | 1.39±0.13  |
| acidic (leucine-rich) nuclear phosphoprotein 32 family, member A                                                               | Anp32a                  | 1.22±0.31  |
| Acidic (leucine-rich) nuclear phosphoprotein 32 family, member E                                                               | Anp32e                  | 3.5±0.22   |
| acidic nuclear phosphoprotein 32 family, member B                                                                              | Anp32b                  | 2.93±0.33  |
| acidic ribosomal phosphoprotein P0                                                                                             | Arbp                    | 23±0.47    |
| acireductone dioxygenase 1                                                                                                     | Adi1                    | 7.35±0.37  |
| ACN9 homolog (S. cerevisiae)                                                                                                   | Acn9                    | 4.49±0.47  |
| aconitase 1                                                                                                                    | Aco1                    | 22.83±2.9  |
| aconitase 2, mitochondrial                                                                                                     | Aco2                    | 34.62±1.16 |
| actin binding LIM protein family, member 3                                                                                     | Ablim3                  | 3.19±0.23  |
| actin related protein 2/3 complex, subunit 1A                                                                                  | Arpc1a                  | 9.78±1.08  |
| actin related protein 2/3 complex, subunit 1B                                                                                  | Arpc1b                  | 2.3±0.28   |
| actin related protein 2/3 complex, subunit 2 (predicted)                                                                       | Arpc2_predicted         | 16.04±1.67 |
| actin related protein 2/3 complex, subunit 3 (predicted)                                                                       | Arpc3_predicted         | 10.64±0.75 |
| actin related protein 2/3 complex, subunit 4 (predicted)                                                                       | Arpc4_predicted         | 2.45±0.72  |
| actin related protein 2/3 complex, subunit 5                                                                                   | Arpc5                   | 10.21±0.57 |
| actin related protein 2/3 complex, subunit 5-like /// similar to actin related protein 2/3 complex, subunit 5-like (predicted) | Arpc5l ///              | 4.24±0.42  |
| actin, beta                                                                                                                    | RGD1560362 predicted    |            |
| actin, gamma, cytoplasmic 1                                                                                                    | Actb                    | 32.26±3.38 |
|                                                                                                                                | Actg1 /// LOC295810 /// | 0.44±0.21  |
|                                                                                                                                | LOC360902 ///           |            |
|                                                                                                                                | RGD1563410 predicted    |            |
| actin, gamma, cytoplasmic 1 /// similar to Actin, cytoplasmic 2 (Gamma-actin)                                                  | Actg1 /// LOC295810     | 40.65±2.43 |
| actinin alpha 4                                                                                                                | Actn4                   | 12.97±2.37 |
| actinin, alpha 1                                                                                                               | Actn1                   | 0.24±0.33  |
| actin-like 6A                                                                                                                  | Actl6a                  | 3±0.09     |
| activating signal cointegrator 1 complex subunit 1                                                                             | Ascc1                   | 1.03±0.06  |
| activating signal cointegrator 1 complex subunit 2                                                                             | Ascc2                   | 0.37±0.06  |
| activating signal cointegrator 1 complex subunit 3 (predicted)                                                                 | Ascc3_predicted         | 1.15±0.15  |
| activating signal cointegrator 1 complex subunit 3-like 1                                                                      | Ascc3l1                 | 1.79±0.14  |
| activating transcription factor 1                                                                                              | Atf1                    | 3.88±0.28  |
| activating transcription factor 4                                                                                              | Atf4                    | 7.37±0.95  |
| Activating transcription factor 6 (predicted)                                                                                  | Atf6_predicted          | 3.54±0.72  |
| activating transcription factor 7 interacting protein (predicted)                                                              | Atf7ip_predicted        | 1.32±0.16  |
| activator of basal transcription 1                                                                                             | Abt1                    | 1.22±0.17  |
| activin receptor IIA                                                                                                           | Acvr2a                  | 0.95±0.12  |
| activity-dependent neuroprotective protein                                                                                     | Adnp                    | 3.76±0.07  |
| acyl-CoA synthetase family member 2                                                                                            | Acsf2                   | 8.04±1.19  |
| acyl-CoA synthetase family member 3                                                                                            | Acsf3                   | 1.83±0.41  |
| acyl-CoA synthetase long-chain family member 1                                                                                 | Acs1l                   | 13.55±0.71 |
| acyl-CoA synthetase long-chain family member 3                                                                                 | Acs13                   | 2.26±0.26  |
| acyl-CoA synthetase long-chain family member 4                                                                                 | Acs14                   | 9.8±1.04   |
| acyl-CoA synthetase medium-chain family member 2A                                                                              | Acsm2a                  | 59.32±1.72 |
| acyl-CoA synthetase medium-chain family member 3                                                                               | Acsm3                   | 18.32±3.41 |
| acyl-CoA synthetase short-chain family member 1 (predicted)                                                                    | Acss1_predicted         | 21.45±1.59 |
| acyl-CoA synthetase short-chain family member 2 (predicted)                                                                    | Acss2_predicted         | 4±2.48     |
| acyl-CoA thioesterase 1                                                                                                        | Acot1                   | 24.24±1.62 |
| acyl-CoA thioesterase 1 /// acyl-CoA thioesterase 2                                                                            | Acot1 /// Acot2         | 5.67±0.11  |
| acyl-CoA thioesterase 2                                                                                                        | Acot2                   | 4.45±0.26  |
| acyl-CoA thioesterase 3 /// acyl-CoA thioesterase 4                                                                            | Acot3 /// Acot4         | 1.08±0.12  |
| acyl-CoA thioesterase 4                                                                                                        | Acot4                   | 4.07±0.21  |
| acyl-CoA thioesterase 7                                                                                                        | Acot7                   | 1.21±0.18  |
| acyl-CoA thioesterase 8                                                                                                        | Acot8                   | 3.02±0.59  |
| acyl-Coenzyme A binding domain containing 3                                                                                    | Acbd3                   | 2.33±0.46  |
| acyl-Coenzyme A binding domain containing 4                                                                                    | Acbd4                   | 4.11±0.41  |
| acyl-Coenzyme A binding domain containing 5                                                                                    | Acbd5                   | 12.06±0.15 |
| acyl-Coenzyme A binding domain containing 6                                                                                    | Acbd6                   | 1.28±0.04  |
| acyl-Coenzyme A dehydrogenase family, member 11 (predicted)                                                                    | Acad11_predicted        | 1.43±0.52  |
| acyl-Coenzyme A dehydrogenase family, member 9                                                                                 | Acad9                   | 3.09±0.27  |
| acyl-Coenzyme A dehydrogenase, long-chain                                                                                      | Acadl                   | 19.87±1.23 |
| acyl-Coenzyme A dehydrogenase, medium chain                                                                                    | Acadm                   | 32.48±3.65 |
| acyl-Coenzyme A dehydrogenase, short chain                                                                                     | Acads                   | 2.99±1.1   |
| acyl-Coenzyme A dehydrogenase, short/branched chain                                                                            | Acadsb                  | 0.33±0.15  |
| acyl-Coenzyme A dehydrogenase, very long chain                                                                                 | Acadvl                  | 9.29±0.87  |
| acyl-Coenzyme A oxidase 1, palmitoyl                                                                                           | Acox1                   | 26.97±1.91 |
| acylglycerol kinase                                                                                                            | Agk                     | 0.66±0.11  |
| acylpeptide hydrolase                                                                                                          | Apeh                    | 4.72±0.46  |
| acylphosphatase 1, erythrocyte (common) type (predicted)                                                                       | Acyp1_predicted         | 2.13±0.31  |
| ADAMTS-like 4                                                                                                                  | Adamts14                | 0.71±0.14  |
| adaptor protein complex AP-1, beta 1 subunit                                                                                   | Ap1b1                   | 4.59±0.45  |
| adaptor protein complex AP-1, sigma 1 (predicted)                                                                              | Ap1s1_predicted         | 3.54±0.5   |
| adaptor protein complex AP-2, alpha 2 subunit                                                                                  | Ap2a2                   | 8.48±0.95  |
| adaptor protein, phosphotyrosine interaction, PH domain and leucine zipper containing 2                                        | App12                   | 2.1±0.26   |
| adaptor-related protein complex 1, gamma 1 subunit                                                                             | Ap1g1                   | 1.91±0.14  |
| adaptor-related protein complex 2, beta 1 subunit                                                                              | Ap2b1                   | 2.15±0.61  |
| adaptor-related protein complex 2, mu 1 subunit                                                                                | Ap2m1                   | 19.3±0.41  |
| adaptor-related protein complex 2, sigma 1 subunit                                                                             | Ap2s1                   | 8.57±1     |
| adaptor-related protein complex 3, beta 1 subunit (predicted)                                                                  | Ap3b1_predicted         | 2.72±0.24  |
| adaptor-related protein complex 3, delta 1 subunit                                                                             | Ap3d1                   | 16.47±2.12 |
| adaptor-related protein complex 3, mu 1 subunit                                                                                | Ap3m1                   | 4.94±0.24  |
| adaptor-related protein complex 3, sigma 1 subunit (predicted)                                                                 | Ap3s1_predicted         | 2.22±0.31  |
| adaptor-related protein complex AP-1, mu subunit 1                                                                             | Ap1m1                   | 3.51±0.78  |
| adaptor-related protein complex AP-4, beta 1 (predicted)                                                                       | Ap4b1_predicted         | 1.31±0.14  |
| adducin 1 (alpha)                                                                                                              | Add1                    | 12.13±1.42 |

|                                                                                                  |                                                                                            |            |
|--------------------------------------------------------------------------------------------------|--------------------------------------------------------------------------------------------|------------|
| adducin 3 (gamma)                                                                                | Add3                                                                                       | 5.41±0.66  |
| adenine phosphoribosyl transferase (predicted)                                                   | Aprt_predicted                                                                             | 14.32±2.45 |
| adenosine deaminase, RNA-specific, B1                                                            | Adarb1                                                                                     | 0.27±0.1   |
| adenosine kinase                                                                                 | Adk                                                                                        | 22.04±1.77 |
| adenosine monophosphate deaminase 2 (isoform L)                                                  | Ampd2                                                                                      | 2.5±0.06   |
| adenylate kinase 2                                                                               | Ak2                                                                                        | 33.12±1.21 |
| adenylate kinase 3                                                                               | Ak3                                                                                        | 20.48±0.41 |
| adenylate kinase 3-like 1                                                                        | Ak3l1                                                                                      | 22.87±3.09 |
| adenylosuccinate lyase                                                                           | Adsl                                                                                       | 1.8±0.18   |
| adenylosuccinate synthetase, non muscle (predicted)                                              | Adss_predicted                                                                             | 11.33±0.81 |
| adhesion molecule with Ig like domain 1                                                          | Amigo1                                                                                     | 0.42±0.04  |
| adhesion molecule with Ig like domain 3                                                          | Amigo3                                                                                     | 0.39±0.18  |
| adhesion regulating molecule 1                                                                   | Adrm1                                                                                      | 1.09±0.22  |
| adiponectin receptor 1                                                                           | Adipor1                                                                                    | 9.56±0.79  |
| adiponectin receptor 2                                                                           | Adipor2                                                                                    | 1.37±0.16  |
| adipose differentiation related protein                                                          | Adfp                                                                                       | 7.31±1.36  |
| ADNP homeobox 2                                                                                  | Adnp2                                                                                      | 0.59±0.07  |
| ADP-dependent glucokinase                                                                        | Adpgk                                                                                      | 0.32±0.14  |
| ADP-ribosylarginine hydrolase                                                                    | Adprh                                                                                      | 0.48±0.04  |
| ADP-ribosylation factor 1                                                                        | Arf1                                                                                       | 29.41±0.85 |
| ADP-ribosylation factor 2                                                                        | Arf2                                                                                       | 0.63±0.12  |
| ADP-ribosylation factor 3                                                                        | Arf3                                                                                       | 3±0.4      |
| ADP-ribosylation factor 4                                                                        | Arf4                                                                                       | 13.33±0.41 |
| ADP-ribosylation factor 5                                                                        | Arf5                                                                                       | 2.85±0.62  |
| ADP-ribosylation factor 6                                                                        | Arf6                                                                                       | 1.6±0.34   |
| ADP-ribosylation factor GTPase activating protein 1                                              | Arfgap1                                                                                    | 1.04±0.06  |
| ADP-ribosylation factor guanine nucleotide-exchange factor 1 (brefeldin A-inhibited) (predicted) | Arfgef1_predicted                                                                          | 3.9±0.62   |
| ADP-ribosylation factor guanine nucleotide-exchange factor 2 (brefeldin A-inhibited)             | Arfgef2                                                                                    | 1.01±0.12  |
| ADP-ribosylation factor interacting protein 1                                                    | Arfp1                                                                                      | 0.59±0.18  |
| ADP-ribosylation factor interacting protein 2                                                    | Arfp2                                                                                      | 2.46±0.5   |
| ADP-ribosylation factor related protein 1                                                        | Arfrp1                                                                                     | 1.87±0.14  |
| ADP-ribosylation factor-like 1                                                                   | Arl1                                                                                       | 3.62±0.91  |
| ADP-ribosylation factor-like 13B                                                                 | Arl13b                                                                                     | 0.87±0.11  |
| ADP-ribosylation factor-like 2                                                                   | Arl2                                                                                       | 0.87±0.03  |
| ADP-ribosylation factor-like 2 binding protein                                                   | Arl2bp                                                                                     | 8.75±1.22  |
| ADP-ribosylation factor-like 3                                                                   | Arl3                                                                                       | 5.6±0.2    |
| ADP-ribosylation factor-like 4A                                                                  | Arl4a                                                                                      | 1.03±0.16  |
| ADP-ribosylation factor-like 5A                                                                  | Arl5a                                                                                      | 1.77±0.15  |
| ADP-ribosylation factor-like 6 (predicted)                                                       | Arl6_predicted                                                                             | 3.38±0.55  |
| ADP-ribosylation factor-like 6 interacting protein 1                                             | Arl6ip1                                                                                    | 25.66±2.59 |
| ADP-ribosylation factor-like 6 interacting protein 2                                             | Arl6ip2                                                                                    | 3.87±0.42  |
| ADP-ribosylation factor-like 6 interacting protein 4                                             | Arl6ip4                                                                                    | 1.17±0.34  |
| ADP-ribosylation factor-like 6 interacting protein 5                                             | Arl6ip5                                                                                    | 3.88±0.62  |
| ADP-ribosylation factor-like 6 interacting protein 6                                             | Arl6ip6                                                                                    | 0.29±0.11  |
| ADP-ribosylation factor-like 8A                                                                  | Arl8a                                                                                      | 1.17±0.15  |
| ADP-ribosylation factor-like 8B                                                                  | Arl8b                                                                                      | 5.72±0.42  |
| ADP-ribosylhydrolase like 1 /// GH regulated TBC protein 1                                       | Adprhl1 /// Grtp1                                                                          | 8.35±0.58  |
| ADP-ribosylhydrolase like 2 (predicted)                                                          | Adprhl2_predicted                                                                          | 0.4±0.35   |
| adrenergic receptor kinase, beta 1                                                               | Adrbk1                                                                                     | 0.25±0.13  |
| adrenergic receptor, alpha 1b                                                                    | Adra1b                                                                                     | 0.6±0.04   |
| adrenocortical dysplasia                                                                         | Acd                                                                                        | 1.7±0.23   |
| advanced glycosylation end product-specific receptor                                             | Ager /// Agpat1 /// Btl17 ///<br>Btl18 /// C4-2 /// Crebl1 ///<br>LOC686977 /// Notch4 /// | 2.37±0.16  |
|                                                                                                  | Phx2                                                                                       |            |
| Advillin                                                                                         | Avil                                                                                       | 0.43±0.01  |
| AE binding protein 1 (predicted)                                                                 | Aebp1_predicted                                                                            | 3.04±1.07  |
| AF4/FMR2 family, member 4 (predicted)                                                            | Aff4_predicted                                                                             | 2.97±0.22  |
| afamin                                                                                           | Afm                                                                                        | 0.57±0.55  |
| AFG3(ATPase family gene 3)-like 1 (yeast) (predicted)                                            | Afg3l1_predicted                                                                           | 1.14±0.13  |
| AFG3(ATPase family gene 3)-like 2 (yeast)                                                        | Afg3l2                                                                                     | 1.79±0.17  |
| afthiphilin                                                                                      | Aftph                                                                                      | 5±0.28     |
| agmatine ureohydrolase (agmatinase)                                                              | Agmat                                                                                      | 3.33±0.72  |
| AKT1 substrate 1 (proline-rich) (predicted)                                                      | Akt1s1_predicted                                                                           | 1.6±0.38   |
| alanine-glyoxylate aminotransferase 2                                                            | Agxt2                                                                                      | 52.89±2.75 |
| alanyl (membrane) aminopeptidase                                                                 | Anpep                                                                                      | 15.16±3.46 |
| alanyl-tRNA synthetase                                                                           | Aars                                                                                       | 14.2±1.52  |
| alanyl-tRNA synthetase domain containing 1                                                       | Aarsd1                                                                                     | 1.49±0.26  |
| alcohol dehydrogenase 1 (class I)                                                                | Adh                                                                                        | 34.66±3.53 |
| alcohol dehydrogenase 4 (class II), pi polypeptide /// alcohol dehydrogenase 5                   | Adh4 /// Adh5                                                                              | 6.77±0.51  |
| alcohol dehydrogenase, iron containing, 1                                                        | Adhfe1                                                                                     | 19.68±1.3  |
| aldehyde dehydrogenase 1 family, member A1                                                       | Aldh1a1                                                                                    | 26.51±2.23 |
| aldehyde dehydrogenase 1 family, member L1                                                       | Aldh1l1                                                                                    | 11.43±0.25 |
| aldehyde dehydrogenase 16 family, member A1                                                      | Aldh16a1                                                                                   | 5.58±0.6   |
| aldehyde dehydrogenase 2, mitochondrial                                                          | Aldh2                                                                                      | 18.36±2.33 |
| aldehyde dehydrogenase 9 family, member A1                                                       | Aldh9a1                                                                                    | 17.28±1.35 |
| aldehyde dehydrogenase family 3, subfamily A2                                                    | Aldh3a2                                                                                    | 4.92±0.28  |
| aldehyde dehydrogenase family 6, subfamily A1                                                    | Aldh6a1                                                                                    | 42.12±3.45 |
| aldehyde dehydrogenase family 7, member A1                                                       | Aldh7a1                                                                                    | 48.44±1.78 |
| aldo-keto reductase family 1, member A1 (aldehyde reductase)                                     | Akr1a1                                                                                     | 67.1±2.55  |
| Aldo-keto reductase family 1, member B10 (aldose reductase)                                      | Akr1b10                                                                                    | 2.02±0.12  |
| aldo-keto reductase family 1, member C19                                                         | Akr1c19                                                                                    | 0.89±0.26  |
| aldo-keto reductase family 1, member C6                                                          | Akr1c6                                                                                     | 15.58±2.4  |
| aldo-keto reductase family 1, member E1                                                          | Akr1e1                                                                                     | 10.33±0.42 |
| aldo-keto reductase family 7, member A2 (aflatoxin aldehyde reductase)                           | Akr7a2                                                                                     | 42.45±4.85 |
| aldo-keto reductase family 7, member A3 (aflatoxin aldehyde reductase)                           | Akr7a3                                                                                     | 12.74±2.75 |
| aldolase A                                                                                       | Aldoa                                                                                      | 38.76±5.4  |

|                                                                                     |                    |            |
|-------------------------------------------------------------------------------------|--------------------|------------|
| aldolase B                                                                          | Aldob              | 74.15±6.16 |
| alkaline phosphatase, liver/bone/kidney                                             | Alpl               | 6.9±1.41   |
| alkB, alkylation repair homolog (E. coli) (predicted)                               | Alkbh_predicted    | 1.51±0.16  |
| alkB, alkylation repair homolog 2 (E. coli) (predicted)                             | Alkbh2_predicted   | 1.78±0.45  |
| alkB, alkylation repair homolog 3 (E. coli)                                         | Alkbh3             | 2.52±0.54  |
| alkB, alkylation repair homolog 4 (E. coli) (predicted)                             | Alkbh4_predicted   | 0.26±0.07  |
| alkB, alkylation repair homolog 5 (E. coli) (predicted)                             | Alkbh5_predicted   | 1.17±0.2   |
| alkB, alkylation repair homolog 7 (E. coli)                                         | Alkbh7             | 3.24±0.37  |
| alpha globin regulatory element containing gene                                     | Mare               | 0.77±0.16  |
| alpha glucosidase 2 alpha neutral subunit (predicted)                               | Ganab_predicted    | 3.73±0.46  |
| alpha thalassemia/mental retardation syndrome X-linked homolog (human)              | Atrx               | 2.66±0.42  |
| alpha-2,6-sialyltransferase ST6GalNAc IV                                            | siat7D             | 0.51±0.14  |
| Alpha-kinase 3 (predicted)                                                          | Alpk3_predicted    | 0.32±0.08  |
| alpha-methylacyl-CoA racemase                                                       | Amacr              | 13.43±1.42 |
| alpha-spectrin 2                                                                    | Spna2              | 17.76±2.79 |
| amidohydrolase domain containing 2                                                  | Amdhd2             | 0.52±0.11  |
| amine oxidase (flavin containing) domain 2                                          | Aof2               | 0.84±0.11  |
| amine oxidase, flavin containing 1 (predicted)                                      | Aof1_predicted     | 2.3±0.4    |
| aminoacylase 1                                                                      | Acy1               | 42.07±3.2  |
| aminoadipate-semialdehyde dehydrogenase                                             | Aasdh              | 0.58±0.08  |
| aminoadipate-semialdehyde dehydrogenase-phosphopantetheinyl transferase (predicted) | Aasdhppt_predicted | 6.11±0.79  |
| aminoadipate-semialdehyde synthase (predicted)                                      | Aass_predicted     | 45.77±5.66 |
| aminocarboxymuconate semialdehyde decarboxylase                                     | Acmsd              | 14.46±0.35 |
| aminolevulinic acid synthase 1                                                      | Alad               | 9.77±1.47  |
| aminomethyltransferase (glycine cleavage system protein T)                          | Alas1              | 2.49±0.22  |
| aminopeptidase puromycin sensitive                                                  | Amt                | 9.99±1.56  |
| aminopeptidase-like 1 (predicted)                                                   | Npepps             | 1.89±0.14  |
| amino-terminal enhancer of split                                                    | Npepl1_predicted   | 2.64±0.27  |
| AMME chromosomal region gene 1-like                                                 | Aes                | 0.74±0.78  |
| amniotless (predicted)                                                              | Ammecr11           | 3.16±0.16  |
| amplified in osteosarcoma                                                           | Amn_predicted      | 29.94±5.6  |
| amylo-1,6-glucosidase, 4-alpha-glucanotransferase                                   | Os9                | 0.92±0.21  |
| amyloid beta (A4) precursor protein                                                 | Ag1                | 4.15±0.33  |
| amyloid beta (A4) precursor protein-binding, family A, member 3                     | App                | 30.45±2.03 |
| amyloid beta (A4) precursor protein-binding, family B, member 1                     | Apba3              | 1.22±0.15  |
| amyloid beta (A4) precursor protein-binding, family B, member 2                     | Apbb1              | 0.27±0.05  |
| amyloid beta (A4) precursor protein-binding, family B, member 3                     | Apbb2              | 1.92±0.25  |
| amyloid beta (A4) precursor-like protein 2                                          | Apbb3              | 0.73±0.14  |
| Amyloid beta precursor protein (cytoplasmic tail) binding protein 2                 | Ap1p2              | 2.64±0.6   |
| amyloid beta precursor protein binding protein 1                                    | Appbp2             | 2.25±0.14  |
| amyotrophic lateral sclerosis 2 (juvenile) chromosome region, candidate 2           | Appbp1             | 2.64±0.54  |
| Amyotrophic lateral sclerosis 2 (juvenile) homolog (human)                          | Als2cr2            | 4.46±0.14  |
| anaphase promoting complex subunit 1 (predicted)                                    | Als2               | 3.04±0.23  |
| anaphase promoting complex subunit 10 (predicted)                                   | Anapc1_predicted   | 0.51±0.23  |
| anaphase promoting complex subunit 11 homolog (yeast)                               | Anapc10_predicted  | 0.32±0.07  |
| anaphase promoting complex subunit 2                                                | Anapc11            | 2.16±0.35  |
| anaphase promoting complex subunit 4                                                | Anapc2             | 3.06±0.15  |
| anaphase promoting complex subunit 7 (predicted)                                    | Anapc4             | 2.5±0.49   |
| anaphase-promoting complex subunit 5 (predicted)                                    | Anapc7_predicted   | 0.51±0.1   |
| ancient ubiquitous protein 1                                                        | Anapc5_predicted   | 9.45±1.1   |
| androgen receptor                                                                   | Aup1               | 3.02±0.29  |
| angel homolog 1 (Drosophila) (predicted)                                            | Ar                 | 0.94±0.03  |
| angel homolog 2 (Drosophila) (predicted)                                            | Angel1_predicted   | 0.66±0.09  |
| angio-associated migratory protein (predicted)                                      | Angel2_predicted   | 1.87±0.25  |
| angiogenic factor with G patch and FHA domains 1                                    | Aamp_predicted     | 4.43±0.32  |
| angiogenin, ribonuclease A family, member 1                                         | Aggf1              | 0.76±0.24  |
| angiopoietin 1                                                                      | Anq1               | 1.48±0.3   |
| angiopoietin-like 2                                                                 | Angpt1             | 0.34±0.11  |
| angiotensin II receptor, type 1a                                                    | Angpt2             | 0.91±0.29  |
| angiotensin II, type I receptor-associated protein                                  | Aqtr1a             | 11.58±0.78 |
| anillin, actin binding protein (scraps homolog, Drosophila)                         | Agtrap             | 9.84±1.19  |
| ankrin repeat domain 50                                                             | Anln               | 0.31±0.13  |
| ankyrin 2, neuronal                                                                 | Ankrd50            | 0.33±0.08  |
| ankyrin 3, epithelial                                                               | Ank2               | 0.2±0.05   |
| ankyrin repeat and BTB (POZ) domain containing 1                                    | Ank3               | 14.46±1.14 |
| ankyrin repeat and BTB (POZ) domain containing 2                                    | Abtb1              | 0.84±0.22  |
| ankyrin repeat and FYVE domain containing 1 (predicted)                             | Abtb2              | 0.87±0.24  |
| ankyrin repeat and IBR domain containing 1                                          | Ankyf1_predicted   | 5.38±0.7   |
| ankyrin repeat and LEM domain containing 2                                          | Ankib1             | 3.11±0.35  |
| ankyrin repeat and MYND domain containing 2 (predicted)                             | Ankle2             | 0.8±0.11   |
| ankyrin repeat and SAM domain containing 1 (predicted)                              | Ankmy2_predicted   | 1.73±0.24  |
| ankyrin repeat and SOCS box-containing protein 1 (predicted)                        | Anks1_predicted    | 1.84±0.67  |
| ankyrin repeat and SOCS box-containing protein 13                                   | Asb1_predicted     | 0.22±0.07  |
| ankyrin repeat and SOCS box-containing protein 3 (predicted)                        | Asb13              | 1.01±0.15  |
| ankyrin repeat and SOCS box-containing protein 6                                    | Asb3_predicted     | 0.41±0.06  |
| ankyrin repeat and SOCS box-containing protein 8 (predicted)                        | Asb6               | 0.63±0.11  |
| ankyrin repeat and SOCS box-containing protein 9 (predicted)                        | Asb8_predicted     | 3.57±0.19  |
| ankyrin repeat and sterile alpha motif domain containing 3                          | Asb9_predicted     | 2.57±0.44  |
| ankyrin repeat and zinc finger domain containing 1                                  | Anks3              | 0.88±0.12  |
| ankyrin repeat domain 10                                                            | Ankzf1             | 0.43±0.02  |
| ankyrin repeat domain 12 (predicted)                                                | Ankrd10            | 0.33±0.36  |
| ankyrin repeat domain 13a                                                           | Ankrd12_predicted  | 0.3±0.15   |
| ankyrin repeat domain 13C                                                           | Ankrd13a           | 2.78±0.41  |
| ankyrin repeat domain 15                                                            | Ankrd13c           | 15.47±0.11 |
| ankyrin repeat domain 17                                                            | Ankrd15            | 2.09±0.12  |
| ankyrin repeat domain 24 (predicted)                                                | Ankrd17            | 2.51±0.5   |
|                                                                                     | Ankrd24_predicted  | 0.53±0.06  |

|                                                                                |                   |            |
|--------------------------------------------------------------------------------|-------------------|------------|
| ankyrin repeat domain 26                                                       | Ankrd26           | 0.42±0.06  |
| ankyrin repeat domain 28                                                       | Ankrd28           | 1.77±0.24  |
| ankyrin repeat domain 37                                                       | Ankrd37           | 3.92±0.66  |
| ankyrin repeat domain 42 (predicted)                                           | Ankrd42_predicted | 0.72±0.13  |
| ankyrin repeat domain 46                                                       | Ankrd46           | 4.34±0.27  |
| ankyrin repeat domain 49 (predicted)                                           | Ankrd49_predicted | 0.7±0.11   |
| ankyrin repeat domain 52 (predicted)                                           | Ankrd52_predicted | 0.71±0.23  |
| ankyrin repeat domain 54                                                       | Ankrd54           | 0.29±0.03  |
| ankyrin repeat, family A (RFXANK-like), 2                                      | Ankra2            | 1.06±0.12  |
| annexin A11                                                                    | Anxa11            | 4.07±0.68  |
| annexin A7                                                                     | Anxa7             | 0.29±0.35  |
| anterior pharynx defective 1a homolog (C. elegans)                             | Aph1a             | 1.99±0.66  |
| antigen identified by monoclonal antibody Ki-67 (predicted)                    | Mki67_predicted   | 0.87±0.29  |
| antigenic determinant of rec-A protein                                         | Kin               | 0.82±0.26  |
| anti-Mullerian hormone type 2 receptor                                         | Amhr2             | 1.14±0.24  |
| Antisense paternally expressed gene 3                                          | Apeg3             | 0.51±0.22  |
| antizyme inhibitor 1                                                           | Azin1             | 2.3±0.36   |
| AP1 gamma subunit binding protein 1                                            | Ap1gbp1           | 1.84±0.28  |
| AP2 associated kinase 1                                                        | Aak1              | 0.25±0.14  |
| APAF1 interacting protein (predicted)                                          | Apip_predicted    | 1.8±0.07   |
| apelin, AGTRL1 ligand                                                          | Apln              | 0.73±0.34  |
| apobec-1 complementation factor                                                | Acf               | 0.36±0.06  |
| apolipoprotein A-I binding protein (predicted)                                 | Apoa1bp_predicted | 5.81±0.76  |
| apolipoprotein B editing complex 1                                             | Apobec1           | 0.42±0.33  |
| apolipoprotein C-II                                                            | Apoc2             | 1.45±0.25  |
| apolipoprotein C-III                                                           | Apoc3             | 10.72±1.28 |
| apolipoprotein E                                                               | ApoE              | 36.48±1.37 |
| apolipoprotein M                                                               | Apom              | 33.65±3.34 |
| apolipoprotein O-like                                                          | Apool             | 4.4±0.82   |
| apoptosis antagonizing transcription factor                                    | Aatf              | 0.84±0.16  |
| Apoptosis inhibitor 5 (predicted)                                              | Api5_predicted    | 6.76±0.28  |
| apoptosis, caspase activation inhibitor (predicted)                            | Aven_predicted    | 0.79±0.18  |
| apoptosis-inducing factor, mitochondrion-associated 1                          | Aifm1             | 14.89±1.24 |
| apoptosis-inducing factor, mitochondrion-associated 2                          | Aifm2             | 0.55±0.13  |
| apoptotic chromatin condensation inducer 1                                     | Acin1             | 2.07±0.36  |
| apratatin                                                                      | Aptx              | 0.75±0.08  |
| apurinic/apurimidinic endonuclease 1                                           | Apex1             | 3.62±0.15  |
| aquaporin 1                                                                    | Aqp1              | 21.46±1.55 |
| aquaporin 11                                                                   | Aqp11             | 8.68±0.86  |
| aquaporin 3                                                                    | Aqp3              | 4.52±0.69  |
| aquaporin 7                                                                    | Aqp7              | 22.12±2.38 |
| aquarius (predicted)                                                           | Aqr_predicted     | 1.45±0.17  |
| archaelysin family metallopeptidase 2                                          | Amz2              | 0.91±0.18  |
| archain 1                                                                      | Arcn1             | 4.91±0.59  |
| arginine vasopressin-induced 1                                                 | Avpi1             | 1.53±0.3   |
| arginine/serine-rich coiled-coil 1                                             | Rsrc1             | 0.68±0.2   |
| arginine-glutamic acid dipeptide (RE) repeats                                  | Rere              | 1.35±0.14  |
| arginine-rich, mutated in early stage tumors (predicted)                       | Armet_predicted   | 8.15±1.82  |
| arginine-tRNA-protein transferase 1 (predicted)                                | Ate1_predicted    | 2.26±0.29  |
| argininosuccinate lyase                                                        | Asl               | 30.77±2.63 |
| argininosuccinate synthetase 1                                                 | Ass1              | 71.91±1.45 |
| arginyl aminopeptidase (aminopeptidase B)                                      | Rnpep             | 0.22±0.28  |
| arginyl-tRNA synthetase (predicted)                                            | Rars_predicted    | 2.05±0.09  |
| arginyl-tRNA synthetase 2, mitochondrial                                       | Rars2             | 1.84±0.2   |
| ariadne homolog 2 (Drosophila) (predicted)                                     | Arih2_predicted   | 0.68±0.18  |
| Ariadne ubiquitin-conjugating enzyme E2 binding protein homolog 1 (Drosophila) | Arih1             | 1.14±0.32  |
| armadillo repeat containing 1 (predicted)                                      | Armc1_predicted   | 6.46±0.56  |
| armadillo repeat containing 10                                                 | Armc10            | 1.09±0.08  |
| armadillo repeat containing 5                                                  | Armc5             | 0.37±0.07  |
| armadillo repeat containing 8 (predicted)                                      | Armc8_predicted   | 1.15±0.11  |
| armadillo repeat containing 9 (predicted)                                      | Armc9_predicted   | 0.86±0.06  |
| armadillo repeat containing, X-linked 1                                        | Armcx1            | 0.68±0.24  |
| armadillo repeat containing, X-linked 3                                        | Armcx3            | 1.29±0.16  |
| ARP1 actin-related protein 1 homolog A (yeast) (predicted)                     | Actr1a_predicted  | 2.24±0.37  |
| ARP1 actin-related protein 1 homolog B (yeast)                                 | Actr1b            | 2.55±0.16  |
| ARP10 actin-related protein 10 homolog (S. cerevisiae)                         | Actr10            | 4.06±0.06  |
| ARP2 actin-related protein 2 homolog (yeast)                                   | Actr2             | 13.06±2.42 |
| ARP3 actin-related protein 3 homolog (yeast)                                   | Actr3             | 6.11±0.7   |
| ARP6 actin-related protein 6 homolog (yeast) (predicted)                       | Actr6_predicted   | 1.56±0.06  |
| ARP8 actin-related protein 8 homolog (S. cerevisiae) (predicted)               | Actr8_predicted   | 3.53±0.15  |
| arrestin domain containing 1                                                   | Arrdc1            | 0.93±0.15  |
| arsA arsenite transporter, ATP-binding, homolog 1 (bacterial)                  | Asna1             | 5.14±0.76  |
| arsenic (+3 oxidation state) methyltransferase                                 | As3mt             | 4.14±0.08  |
| ARV1 homolog (yeast) (predicted)                                               | Arv1_predicted    | 1±0.12     |
| aryl hydrocarbon receptor nuclear translocator-like                            | Arntl             | 0.31±0.1   |
| arylacetyl deacetylase (esterase)                                              | Aadac             | 2.49±0.2   |
| aryl-hydrocarbon receptor-interacting protein                                  | Aip               | 1.89±0.3   |
| arylsulfatase A                                                                | Arsa              | 1.29±0.34  |
| arylsulfatase B                                                                | Arsb              | 7.66±0.79  |
| arylsulfatase E (chondrodysplasia punctata 1)                                  | Arse              | 0.22±0.07  |
| arylsulfatase K                                                                | Arsk              | 0.8±0.11   |
| ASF1 anti-silencing function 1 homolog A (S. cerevisiae) (predicted)           | Asf1a_predicted   | 1.75±0.11  |
| ash1 (absent, small, or homeotic)-like (Drosophila) (predicted)                | Ash1l_predicted   | 2.61±0.32  |
| ash2 (absent, small, or homeotic)-like (Drosophila) (predicted)                | Ash2l_predicted   | 1.88±0.04  |
| asialoglycoprotein receptor 1                                                  | Asqr1             | 0.32±0.05  |
| asp (abnormal spindle)-like, microcephaly associated (Drosophila) (predicted)  | Aspm_predicted    | 0.25±0.14  |
| asparaginase like 1                                                            | Asrgl1            | 4.23±1.05  |

|                                                                                                |                    |            |
|------------------------------------------------------------------------------------------------|--------------------|------------|
| asparagine synthetase domain containing 1                                                      | Asnsd1             | 1.84±0.14  |
| asparagine-linked glycosylation 1 homolog (yeast, beta-1,4-mannosyltransferase) (predicted)    | Alg1_predicted     | 0.58±0.1   |
| asparagine-linked glycosylation 10 homolog B (yeast, alpha-1,2-glucosyltransferase)            | Alg10b             | 2.11±0.23  |
| asparagine-linked glycosylation 11 homolog (S. cerevisiae, alpha-1,2-mannosyltransferase)      | Alg11              | 3.01±0.43  |
| asparagine-linked glycosylation 12 homolog (yeast, alpha-1,6-mannosyltransferase) (predicted)  | Alg12_predicted    | 1.28±0.26  |
| asparagine-linked glycosylation 13 homolog (S. cerevisiae)                                     | Alg13              | 1.26±0.29  |
| asparagine-linked glycosylation 14 homolog (S. cerevisiae)                                     | Alg14              | 1.79±0.08  |
| asparagine-linked glycosylation 2 homolog (yeast, alpha-1,3-mannosyltransferase)               | Alg2               | 2.27±0.23  |
| asparagine-linked glycosylation 3 homolog (yeast, alpha-1,3-mannosyltransferase)               | Alg3               | 0.8±0.09   |
| asparagine-linked glycosylation 5 homolog (yeast, dolichyl-phosphate beta-glucosyltransferase) | Alg5               | 4.21±0.83  |
| asparagine-linked glycosylation 8 homolog (yeast, alpha-1,3-glucosyltransferase)               | Alg8               | 2.06±0.27  |
| asparagine-linked glycosylation 9 homolog (yeast, alpha 1,2 mannosyltransferase) (predicted)   | Alg9_predicted     | 1.48±0.18  |
| asparaginyl-tRNA synthetase                                                                    | Nars               | 3.74±0.57  |
| asparaginyl-tRNA synthetase 2, mitochondrial                                                   | Nars2              | 0.86±0.02  |
| aspartoacylase                                                                                 | Aspa               | 12.92±1.03 |
| aspartoacylase (aminoacylase) 3                                                                | Acy3               | 7.6±2.66   |
| aspartyl aminopeptidase                                                                        | Dnppep             | 14.05±0.45 |
| aspartylglucosaminidase                                                                        | Aga                | 8.82±1.1   |
| aspartyl-tRNA synthetase                                                                       | Dars               | 7.54±0.22  |
| aspartyl-tRNA synthetase 2 (mitochondrial)                                                     | Dars2              | 1.34±0.26  |
| AT hook containing transcription factor 1 (predicted)                                          | Ahctf1_predicted   | 2.3±0.58   |
| AT rich interactive domain 1A (Swi1 like) (predicted)                                          | Arid1a_predicted   | 1.12±1.05  |
| AT rich interactive domain 1B (Swi1 like)                                                      | Arid1b             | 0.31±0.02  |
| AT rich interactive domain 2 (Arid-rfx like) (predicted)                                       | Arid2_predicted    | 1.88±0.17  |
| AT rich interactive domain 3B (Bright like) (predicted)                                        | Arid3b_predicted   | 0.51±0.12  |
| AT rich interactive domain 4A (Rbp1 like) (predicted)                                          | Arid4a_predicted   | 1.19±0.12  |
| AT rich interactive domain 4B (Rbp1 like)                                                      | Arid4b             | 1.16±0.06  |
| ataxin 10                                                                                      | Atxn10             | 2.39±0.42  |
| ataxin 2 (predicted)                                                                           | Atxn2_predicted    | 3.19±0.51  |
| ataxin 2-like (predicted)                                                                      | Atxn2l_predicted   | 1.05±0.23  |
| ATG2 autophagy related 2 homolog A (S. cerevisiae)                                             | Atg2a              | 0.68±0.1   |
| ATH1, acid trehalase-like 1 (yeast) (predicted)                                                | Ath1_predicted     | 0.71±0.13  |
| ATP binding domain 1 family, member B (predicted)                                              | Atpbd1b_predicted  | 0.42±0.08  |
| ATP binding domain 1 family, member C                                                          | Atpbd1c            | 0.78±0.17  |
| ATP binding domain 4                                                                           | Atpbd4             | 1.64±0.39  |
| ATP citrate lyase                                                                              | Acly               | 6.72±1.33  |
| ATP synthase mitochondrial F1 complex assembly factor 1 (predicted)                            | Atpaf1_predicted   | 3.03±0.22  |
| ATP synthase mitochondrial F1 complex assembly factor 2 (predicted)                            | Atpaf2_predicted   | 2.11±0.1   |
| ATP synthase, H+ transporting mitochondrial F1 complex, beta subunit                           | Atp5b              | 57.99±0.94 |
| ATP synthase, H+ transporting, mitochondrial F0 complex, subunit b, isoform 1                  | Atp5f1             | 46.99±5.34 |
| ATP synthase, H+ transporting, mitochondrial F0 complex, subunit c (subunit 9) isoform 3       | Atp5g3             | 46.91±0.85 |
| ATP synthase, H+ transporting, mitochondrial F0 complex, subunit c (subunit 9), isoform 1      | Atp5g1             | 39.1±1.72  |
| ATP synthase, H+ transporting, mitochondrial F0 complex, subunit c (subunit 9), isoform 2      | Atp5g2             | 23.48±4.23 |
| ATP synthase, H+ transporting, mitochondrial F0 complex, subunit d                             | Atp5h              | 36.89±1.63 |
| ATP synthase, H+ transporting, mitochondrial F0 complex, subunit e                             | Atp5i              | 18.79±5.39 |
| ATP synthase, H+ transporting, mitochondrial F0 complex, subunit F6                            | Atp5j              | 28.83±0.6  |
| ATP synthase, H+ transporting, mitochondrial F0 complex, subunit s                             | Atp5s              | 0.79±0.08  |
| ATP synthase, H+ transporting, mitochondrial F1 complex, alpha subunit, isoform 1              | Atp5a1             | 49.3±2.38  |
| ATP synthase, H+ transporting, mitochondrial F1 complex, delta subunit                         | Atp5d              | 21.12±3.27 |
| ATP synthase, H+ transporting, mitochondrial F1 complex, epsilon subunit                       | Atp5e              | 31.08±5.02 |
| ATP synthase, H+ transporting, mitochondrial F1 complex, gamma polypeptide 1                   | Atp5c1             | 59.77±1.27 |
| ATP synthase, H+ transporting, mitochondrial F1 complex, O subunit                             | Atp5o              | 48.4±2.88  |
| ATP/GTP binding protein 1 (predicted)                                                          | Agtpbp1_predicted  | 5.25±0.58  |
| ATP5S-like                                                                                     | Atp5sl             | 1.65±0.19  |
| ATPase family, AAA domain containing 1                                                         | Atad1              | 5.29±0.67  |
| ATPase family, AAA domain containing 2 (predicted)                                             | Atad2_predicted    | 0.44±0.03  |
| ATPase family, AAA domain containing 3A                                                        | Atad3a             | 1.3±0.18   |
| ATPase inhibitory factor 1                                                                     | Atpif1             | 8.76±2.17  |
| ATPase type 13A1 (predicted)                                                                   | Atp13a1_predicted  | 2.08±0.44  |
| ATPase, Ca++ transporting, cardiac muscle, slow twitch 2                                       | Atp2a2             | 15.1±1.68  |
| ATPase, Ca++ transporting, plasma membrane 1                                                   | Atp2b1             | 4.86±0.79  |
| ATPase, class II, type 9B                                                                      | Atp9b              | 0.92±0.27  |
| ATPase, class VI, type 11B                                                                     | Atp11b             | 1.01±0.06  |
| ATPase, class VI, type 11C (predicted)                                                         | Atp11c_predicted   | 2.06±0.18  |
| ATPase, Cu++ transporting, beta polypeptide                                                    | Atp7b              | 0.25±0.16  |
| ATPase, H transporting, lysosomal V0 subunit c                                                 | Atp6v0c            | 33.67±3.79 |
| ATPase, H transporting, lysosomal V1 subunit B2                                                | Atp6v1b2           | 23.06±2.02 |
| ATPase, H transporting, lysosomal V1 subunit F                                                 | Atp6v1f            | 17.72±1.33 |
| ATPase, H transporting, lysosomal V1 subunit G1 (predicted)                                    | Atp6v1g1_predicted | 5.79±0.38  |
| ATPase, H+ transporting, lysosomal accessory protein 1                                         | Atp6ap1            | 9.87±0.96  |
| ATPase, H+ transporting, lysosomal accessory protein 2                                         | Atp6ap2            | 17.77±0.53 |
| ATPase, H+ transporting, lysosomal V0 subunit A1                                               | Atp6v0a1           | 0.27±0.27  |
| ATPase, H+ transporting, lysosomal V0 subunit A2                                               | Atp6v0a2           | 0.88±0.06  |
| ATPase, H+ transporting, lysosomal V0 subunit A4                                               | Atp6v0a4           | 20.7±0.93  |
| ATPase, H+ transporting, lysosomal V0 subunit B                                                | Atp6v0b            | 10.34±0.95 |
| ATPase, H+ transporting, lysosomal V0 subunit D1                                               | Atp6v0d1           | 24.32±0.95 |
| ATPase, H+ transporting, lysosomal V0 subunit E1                                               | Atp6v0e            | 11.79±0.75 |
| ATPase, H+ transporting, lysosomal V0 subunit E2                                               | Atp6v0e2           | 10.74±1.47 |
| ATPase, H+ transporting, lysosomal V1 subunit A                                                | Atp6v1a            | 24.73±0.61 |
| ATPase, H+ transporting, lysosomal V1 subunit C1                                               | Atp6v1c1           | 10.11±1.23 |
| ATPase, H+ transporting, lysosomal V1 subunit D                                                | Atp6v1d            | 18.99±0.63 |
| ATPase, H+ transporting, lysosomal V1 subunit H                                                | Atp6v1h            | 5.67±0.3   |
| ATPase, Na+/K+ transporting, alpha 1 polypeptide                                               | Atp1a1             | 42.44±1.62 |
| ATPase, Na+/K+ transporting, beta 1 polypeptide                                                | Atp1b1             | 51.19±1.24 |
| ATPase, Na+/K+ transporting, beta 3 polypeptide                                                | Atp1b3             | 2.28±0.56  |
| ATP-binding cassette, sub-family A (ABC1), member 2                                            | Abca2              | 7.15±1.63  |
| ATP-binding cassette, sub-family A (ABC1), member 3                                            | Abca3              | 8.31±1.34  |

|                                                                                                                     |                   |            |
|---------------------------------------------------------------------------------------------------------------------|-------------------|------------|
| ATP-binding cassette, sub-family A (ABC1), member 4 (predicted)                                                     | Abca4_predicted   | 1.17±0.19  |
| ATP-binding cassette, sub-family A (ABC1), member 7                                                                 | Abca7             | 0.91±0.34  |
| ATP-binding cassette, sub-family B (MDR/TAP), member 10                                                             | Abcb10            | 0.22±0.1   |
| ATP-binding cassette, sub-family B (MDR/TAP), member 1A                                                             | Abcb1a            | 0.65±0.15  |
| ATP-binding cassette, sub-family B (MDR/TAP), member 1B /// ATP-binding cassette, sub-family B (MDR/TAP), member 1A | Abcb1a /// Abcb1b | 0.35±0.12  |
| ATP-binding cassette, sub-family B (MDR/TAP), member 6                                                              | Abcb6             | 1.66±0.29  |
| ATP-binding cassette, sub-family B (MDR/TAP), member 8                                                              | Abcb8             | 1.73±0.18  |
| ATP-binding cassette, sub-family B (MDR/TAP), member 9                                                              | Abcb9             | 0.3±0.03   |
| ATP-binding cassette, sub-family C (CFTR/MRP), member 2                                                             | Abcc2             | 1.23±0.18  |
| ATP-binding cassette, sub-family C (CFTR/MRP), member 4                                                             | Abcc4             | 6.45±0.97  |
| ATP-binding cassette, sub-family C (CFTR/MRP), member 6                                                             | Abcc6             | 0.29±0.07  |
| ATP-binding cassette, sub-family D (ALD), member 3                                                                  | Abcd3             | 9.51±1.97  |
| ATP-binding cassette, sub-family D (ALD), member 4                                                                  | Abcd4             | 1.61±0.24  |
| ATP-binding cassette, sub-family E (OABP), member 1                                                                 | Abce1             | 3.3±0.22   |
| ATP-binding cassette, sub-family F (GCN20), member 1                                                                | Abcf1             | 1.86±0.23  |
| ATP-binding cassette, sub-family F (GCN20), member 2 (predicted)                                                    | Abcf2_predicted   | 1.87±0.12  |
| ATP-binding cassette, sub-family F (GCN20), member 3                                                                | Abcf3             | 2.12±0.15  |
| ATP-binding cassette, sub-family G (WHITE), member 2                                                                | Abcg2             | 9.64±0.79  |
| ATP-binding cassette, sub-family G (WHITE), member 3-like 1                                                         | Abcg3l1           | 2.32±0.21  |
| atrophin 1                                                                                                          | Atn1              | 1.23±0.37  |
| attractin                                                                                                           | Atrn              | 1.49±0.23  |
| attractin like 1                                                                                                    | Atrn1             | 6.67±0.44  |
| ATX1 (antioxidant protein 1) homolog 1 (yeast)                                                                      | Atox1             | 8.48±2.05  |
| AU RNA binding protein/enoyl-coenzyme A hydratase (predicted)                                                       | Auh_predicted     | 10.78±1.62 |
| aurora kinase A interacting protein 1                                                                               | Aurkaip1          | 5.97±0.41  |
| aurora kinase B                                                                                                     | Aurkb             | 0.22±0.06  |
| aurora kinase C (predicted)                                                                                         | Aurkc_predicted   | 0.35±0.09  |
| autocrine motility factor receptor (predicted)                                                                      | Amfr_predicted    | 3.36±0.33  |
| autophagy-related 10 (S. cerevisiae)                                                                                | Atg10             | 0.77±0.16  |
| autophagy-related 12 (yeast)                                                                                        | Atg12             | 2.7±0.24   |
| autophagy-related 16-like 1 (yeast)                                                                                 | Atg16l1           | 1.17±0.33  |
| autophagy-related 3 (yeast)                                                                                         | Atq3              | 4.02±0.63  |
| autophagy-related 4B (yeast)                                                                                        | Atq4b             | 0.73±0.12  |
| Autophagy-related 7 (yeast)                                                                                         | Atg7              | 1.74±0.25  |
| autophagy-related 9A (yeast)                                                                                        | Atq9a             | 2.87±0.26  |
| axin 1                                                                                                              | Axin1             | 0.87±0.24  |
| B9 protein domain 1                                                                                                 | B9d1              | 2.49±0.18  |
| baculoviral IAP repeat-containing 2                                                                                 | Birc2             | 1.7±0.19   |
| BAI1-associated protein 2-like 1                                                                                    | Baiap2l1          | 0.45±0.1   |
| Bardet-Biedl syndrome 1 homolog (human) (predicted)                                                                 | Bbs1_predicted    | 0.86±0.23  |
| Bardet-Biedl syndrome 2 homolog (human)                                                                             | Bbs2              | 1.11±0.13  |
| Bardet-Biedl syndrome 4 homolog (human) (predicted)                                                                 | Bbs4_predicted    | 0.74±0.13  |
| Bardet-Biedl syndrome 5                                                                                             | Bbs5              | 1.06±0.13  |
| Bardet-Biedl syndrome 7                                                                                             | Bbs7              | 2.19±0.13  |
| Bardet-Biedl syndrome 9                                                                                             | Bbs9              | 0.73±0.05  |
| barrier to autointegration factor 1                                                                                 | Banf1             | 6.2±0.36   |
| basic helix-loop-helix domain containing, class B2                                                                  | Bhlhb2            | 1.41±0.19  |
| basic helix-loop-helix domain containing, class B3                                                                  | Bhlhb3            | 0.39±0.05  |
| basic leucine zipper and W2 domains 1                                                                               | Bzw1              | 9.16±0.61  |
| basic leucine zipper nuclear factor 1                                                                               | Blzf1             | 0.43±0.21  |
| basic transcription factor 3                                                                                        | Btf3              | 23.34±1.18 |
| basic transcription factor 3-like 4                                                                                 | Btf3l4            | 7.7±0.1    |
| basigin                                                                                                             | Bsg               | 42.9±3.01  |
| basoonuclin 2 (predicted)                                                                                           | Bnc2_predicted    | 17.7±0.57  |
| basophilic leukemia expressed protein BLES03                                                                        | Bles03            | 2.89±0.58  |
| BAT2 domain containing 1                                                                                            | Bat2d             | 0.33±0.07  |
| B-box and SPRY domain containing                                                                                    | Bspry             | 2.85±0.56  |
| BCDIN3 domain containing                                                                                            | Bcdin3d           | 0.29±0.14  |
| B-cell CLL/lymphoma 7B                                                                                              | Bcl7b             | 4.06±0.18  |
| B-cell CLL/lymphoma 7C (predicted)                                                                                  | Bcl7c_predicted   | 1.05±0.35  |
| B-cell CLL/lymphoma 9 (predicted)                                                                                   | Bcl9_predicted    | 0.51±0.16  |
| B-cell CLL/lymphoma 9-like (predicted)                                                                              | Bcl9l_predicted   | 0.31±0.08  |
| B-cell leukemia/lymphoma 10                                                                                         | Bcl10             | 2.31±0.33  |
| B-cell leukemia/lymphoma 6 (predicted)                                                                              | Bcl6_predicted    | 1.65±1.14  |
| B-cell receptor-associated protein 29                                                                               | Bcap29            | 2.47±0.28  |
| B-cell receptor-associated protein 31                                                                               | Bcap31            | 11.81±0.55 |
| BCL2/adenovirus E1B 19 kDa-interacting protein 3                                                                    | Bnip3             | 19.92±0.22 |
| BCL2/adenovirus E1B 19kDa-interacting protein 1                                                                     | Bnip1             | 0.89±0.16  |
| BCL2/adenovirus E1B interacting protein 3-like                                                                      | Bnip3l            | 9.67±0.84  |
| Bcl2-associated athanogene 1 (predicted)                                                                            | Bag1_predicted    | 2.68±0.08  |
| Bcl2-associated athanogene 3                                                                                        | Bag3              | 3.05±0.28  |
| BCL2-associated athanogene 4                                                                                        | Bag4              | 0.36±0.15  |
| BCL2-associated athanogene 5                                                                                        | Bag5              | 1.49±0.22  |
| bcl2-associated death promoter                                                                                      | Bad               | 1.91±0.14  |
| BCL2-associated transcription factor 1                                                                              | Bclaf1            | 6.05±0.3   |
| Bcl2-associated X protein                                                                                           | Bax               | 1.73±0.41  |
| Bcl2-like 1                                                                                                         | Bcl2l1            | 1.68±0.22  |
| BCL2-like 13 (apoptosis facilitator) (predicted)                                                                    | Bcl2l13_predicted | 0.79±0.14  |
| Bcl2-like 14 (apoptosis facilitator)                                                                                | Bcl2l14           | 0.56±0.08  |
| Bcl2-like 2                                                                                                         | Bcl2l2            | 1.08±0.12  |
| Bcl2-like 2 /// poly(A) binding protein, nuclear 1                                                                  | Bcl2l2 /// Pabpn1 | 4.81±1.13  |
| Bcl-2-related ovarian killer protein                                                                                | Bok               | 0.24±0.13  |
| BCL6 co-repressor-like 1                                                                                            | Bcorl1            | 0.26±0.16  |
| Bcl6 interacting corepressor (predicted)                                                                            | Bcor_predicted    | 0.5±0.14   |
| BCS1-like (yeast)                                                                                                   | Bcs1l             | 0.63±0.14  |
| beclin 1, autophagy related                                                                                         | Becn1             | 2.79±1.15  |
| Bernardinelli-Seip congenital lipodystrophy 2 homolog (human)                                                       | Bscl2             | 6.79±1.27  |

|                                                                                                                                |                               |            |
|--------------------------------------------------------------------------------------------------------------------------------|-------------------------------|------------|
| beta-2 microglobulin                                                                                                           | B2m                           | 52.59±3.73 |
| betaine-homocysteine methyltransferase                                                                                         | Bhmt                          | 1.33±0.24  |
| betaine-homocysteine methyltransferase 2                                                                                       | Bhmt2                         | 39.51±2.83 |
| beta-transducin repeat containing                                                                                              | Btrc                          | 0.3±0.21   |
| BH3 interacting domain death agonist                                                                                           | Bid                           | 1.63±0.13  |
| bicaudal D homolog 2 (Drosophila)                                                                                              | Bicd2                         | 0.92±0.28  |
| bifunctional apoptosis regulator                                                                                               | Bfar                          | 0.82±0.2   |
| bile acid-Coenzyme A: amino acid N-acyltransferase                                                                             | Baat                          | 2.67±0.7   |
| biliverdin reductase A                                                                                                         | Blvra                         | 1.57±0.82  |
| biliverdin reductase B (flavin reductase (NADPH)) (predicted) /// similar to biliverdin reductase B (flavin reductase (NADPH)) | Blvrb_predicted /// LOC681468 | 1.55±0.12  |
| biogenesis of lysosome-related organelles complex-1, subunit 1 (predicted)                                                     | Bloc1s1_predicted             | 5.76±1.2   |
| biogenesis of lysosome-related organelles complex-1, subunit 2                                                                 | Bloc1s2                       | 0.75±0.38  |
| biotinidase                                                                                                                    | Btd                           | 4.47±0.26  |
| biphenyl hydrolase-like (serine hydrolase, breast epithelial mucin-associated antigen)                                         | Bphl                          | 20.43±3.43 |
| bisphosphate 3'-nucleotidase 1                                                                                                 | Bpnt1                         | 10.13±0.24 |
| bladder cancer associated protein homolog (human)                                                                              | Bicap                         | 2.79±0.55  |
| bleomycin hydrolase                                                                                                            | Blmh                          | 2.08±0.12  |
| block of proliferation 1                                                                                                       | Bop1                          | 0.65±0.1   |
| blocked early in transport 1 homolog (S. cerevisiae)                                                                           | Bet1                          | 3.69±0.35  |
| blocked early in transport 1 homolog (S. cerevisiae) like                                                                      | Bet11                         | 0.91±0.17  |
| Bloom syndrome homolog (human) (predicted)                                                                                     | Blm_predicted                 | 0.37±0.09  |
| Bm403207                                                                                                                       | LOC498525                     | 0.79±0.1   |
| BMP and activin membrane-bound inhibitor, homolog (Xenopus laevis)                                                             | Bambi                         | 1.33±0.49  |
| BMS1 homolog, ribosome assembly protein (yeast)                                                                                | Bms1                          | 0.83±0.14  |
| bobby sox homolog (Drosophila) (predicted)                                                                                     | Bbx_predicted                 | 1.88±0.22  |
| bolA homolog 3 (E. coli)                                                                                                       | Bola3                         | 8.57±0.78  |
| bolA-like 1 (E. coli) (predicted)                                                                                              | Bola1_predicted               | 1.84±0.39  |
| bone morphogenetic protein 1                                                                                                   | Bmp1                          | 0.5±0.1    |
| bone morphogenetic protein 4                                                                                                   | Bmp4                          | 1.88±0.5   |
| bone morphogenetic protein 7                                                                                                   | Bmp7                          | 8.45±0.8   |
| bone morphogenetic protein receptor, type 1A                                                                                   | Bmpr1a                        | 1.58±0.32  |
| bone morphogenetic protein receptor, type II (serine/threonine kinase)                                                         | Bmpr2                         | 0.35±0.1   |
| brain abundant, membrane attached signal protein 1                                                                             | Basp1                         | 8.85±2.18  |
| brain and reproductive organ-expressed protein                                                                                 | Bre                           | 3.44±0.6   |
| brain expressed X-linked 2 /// brain expressed gene 1                                                                          | Bex1 /// Bex2                 | 2.43±0.37  |
| brain protein 16                                                                                                               | Brp16                         | 0.64±0.14  |
| brain protein 44-like                                                                                                          | Brp44l                        | 38.29±0.74 |
| brain protein I3                                                                                                               | Bri3                          | 12.82±2.26 |
| brain-specific angiogenesis inhibitor 1-associated protein 2                                                                   | Baiap2                        | 1.43±0.23  |
| branched chain aminotransferase 2, mitochondrial                                                                               | Bcat2                         | 0.53±0.3   |
| branched chain keto acid dehydrogenase E1, beta polypeptide                                                                    | Bckdhb                        | 4.36±0.65  |
| branched chain ketoacid dehydrogenase E1, alpha polypeptide                                                                    | Bckdha                        | 4.82±0.79  |
| branched chain ketoacid dehydrogenase kinase                                                                                   | Bckdk                         | 6.18±0.9   |
| Brca1 associated protein 1 (predicted)                                                                                         | Bap1_predicted                | 3.06±0.36  |
| BRCA1/BRCA2-containing complex, subunit 3                                                                                      | Brc3                          | 10.79±0.4  |
| BRCA2 and CDKN1A interacting protein (predicted)                                                                               | Bccip_predicted               | 2.67±0.28  |
| breakpoint cluster region homolog (predicted)                                                                                  | Bcr_predicted                 | 0.63±0.29  |
| breast cancer anti-estrogen resistance 1                                                                                       | Bcar1                         | 3.59±1.23  |
| breast cancer anti-estrogen resistance 3 (predicted)                                                                           | Bcar3_predicted               | 0.25±0.07  |
| breast cancer metastasis-suppressor 1                                                                                          | Brms1                         | 0.55±0.28  |
| breast cancer metastasis-suppressor 1-like (predicted)                                                                         | Brms11_predicted              | 2.02±0.06  |
| breast carcinoma amplified sequence 2 (predicted)                                                                              | Bcas2_predicted               | 2.62±0.95  |
| BRF1 homolog, subunit of RNA polymerase III transcription initiation factor IIIB (S. cerevisiae) (predicted)                   | Brf1_predicted                | 0.91±0.22  |
| BRF2, subunit of RNA polymerase III transcription initiation factor, BRF1-like                                                 | Brf2                          | 0.29±0.07  |
| Bri3 binding protein                                                                                                           | Bri3bp                        | 1.94±0.6   |
| bridging integrator 1                                                                                                          | Bin1                          | 1.41±0.29  |
| bridging integrator 3                                                                                                          | Bin3                          | 1.74±0.06  |
| brix domain containing 1 (predicted)                                                                                           | Bxdc1_predicted               | 0.61±0.14  |
| brix domain containing 2                                                                                                       | Bxdc2                         | 1.64±0.47  |
| bromo adjacent homology domain containing 1                                                                                    | Bahd1                         | 1.48±0.11  |
| bromodomain adjacent to zinc finger domain, 1A (predicted)                                                                     | Baz1a_predicted               | 0.62±0.09  |
| bromodomain adjacent to zinc finger domain, 1B                                                                                 | Baz1b                         | 3.26±0.45  |
| bromodomain adjacent to zinc finger domain, 2A (predicted)                                                                     | Baz2a_predicted               | 0.44±0.11  |
| bromodomain adjacent to zinc finger domain, 2B (predicted)                                                                     | Baz2b_predicted               | 1.06±0.24  |
| bromodomain and PHD finger containing, 1                                                                                       | Brpf1                         | 0.21±0.07  |
| bromodomain and WD repeat domain containing 2                                                                                  | Brwd2                         | 2.74±0.04  |
| bromodomain containing 1 (predicted)                                                                                           | Brd1_predicted                | 0.71±0.23  |
| bromodomain containing 2                                                                                                       | Brd2                          | 0.37±0.22  |
| bromodomain containing 3 (predicted)                                                                                           | Brd3_predicted                | 0.9±0.13   |
| bromodomain containing 4                                                                                                       | Brd4                          | 1.4±0.36   |
| bromodomain containing 7 (predicted)                                                                                           | Brd7_predicted                | 1.71±0.2   |
| bromodomain containing 8                                                                                                       | Brd8                          | 0.25±0.15  |
| bromodomain containing 9 (predicted)                                                                                           | Brd9_predicted                | 0.89±0.09  |
| BSD domain containing 1                                                                                                        | Bsdc1                         | 1.82±0.52  |
| BTB (POZ) domain containing 1                                                                                                  | Btbd1                         | 3.77±0.16  |
| BTB (POZ) domain containing 10                                                                                                 | Btbd10                        | 0.89±0.11  |
| BTB (POZ) domain containing 12                                                                                                 | Btbd12                        | 0.43±0.11  |
| BTB (POZ) domain containing 14A                                                                                                | Btbd14a                       | 2.05±0.32  |
| BTB (POZ) domain containing 2                                                                                                  | Btbd2                         | 2.09±0.35  |
| BTB (POZ) domain containing 3 (predicted)                                                                                      | Btbd3_predicted               | 0.52±0.05  |
| BTB (POZ) domain containing 6                                                                                                  | Btbd6                         | 2±0.3      |
| BTB (POZ) domain containing 9                                                                                                  | Btbd9                         | 0.51±0.14  |
| Btg3 associated nuclear protein (predicted)                                                                                    | Banp_predicted                | 0.32±0.06  |
| BUD13 homolog (yeast)                                                                                                          | Bud13                         | 0.71±0.05  |
| budding uninhibited by benzimidazoles 1 homolog (S. cerevisiae) (predicted)                                                    | Bub1_predicted                | 0.29±0.09  |
| budding uninhibited by benzimidazoles 3 homolog (S. cerevisiae)                                                                | Bub3                          | 5.04±0.13  |



|                                                                                    |                      |            |
|------------------------------------------------------------------------------------|----------------------|------------|
| Butyryl Coenzyme A synthetase 1 (predicted)                                        | Bucs1_predicted      | 12.42±1.27 |
| Bwk1 leukemia-related gene                                                         | Bwk1                 | 1.29±0.21  |
| bystin-like                                                                        | Bysl                 | 0.6±0.2    |
| C1GALT1-specific chaperone 1                                                       | C1galt1c1            | 4.65±0.82  |
| C1q and tumor necrosis factor related protein 3 (predicted)                        | C1qtnf3_predicted    | 8.1±0.25   |
| c-abl oncogene 1, receptor tyrosine kinase                                         | Abl1                 | 1.08±0.13  |
| cadherin 1                                                                         | Cdh1                 | 1.07±0.72  |
| cadherin 16                                                                        | Cdh16                | 20.45±1.81 |
| cadherin 2                                                                         | Cdh2                 | 2.94±0.13  |
| cadherin 6                                                                         | Cdh6                 | 1.07±0.19  |
| cadherin EGF LAG seven-pass G-type receptor 2                                      | Celsr2               | 3.27±0.39  |
| calcineurin binding protein 1                                                      | Cabin1               | 0.76±0.17  |
| calcitonin gene-related peptide-receptor component protein                         | Crcp                 | 3.43±0.1   |
| calcium activated nucleotidase 1                                                   | Cant1                | 0.64±0.1   |
| calcium and integrin binding 1 (calmyrin)                                          | Cib1                 | 17.18±2.09 |
| calcium and integrin binding family member 2                                       | Cib2                 | 1.88±0.42  |
| calcium binding and coiled coil domain 1                                           | Calcoco1             | 1.54±0.04  |
| calcium binding atopy-related autoantigen 1                                        | Cbara1               | 0.83±0.25  |
| calcium binding protein 39 (predicted)                                             | Cab39_predicted      | 2.94±0.21  |
| calcium binding protein 39-like                                                    | Cab39l               | 2.5±0.13   |
| calcium binding protein p22                                                        | Chp                  | 2.69±0.28  |
| calcium binding protein p22 /// similar to calcium binding protein P22 (predicted) | Chp ///              | 1.07±0.22  |
| calcium homeostasis endoplasmic reticulum protein (predicted)                      | RGD1565588_predicted |            |
| calcium modulating ligand                                                          | Cherp_predicted      | 1.01±0.24  |
| calcium regulated heat stable protein 1                                            | Camlg                | 0.93±0.3   |
| calcium/calmodulin-dependent protein kinase I                                      | Carhsp1              | 3.02±0.43  |
| calcium/calmodulin-dependent protein kinase II gamma                               | Camk1                | 1.76±0.25  |
| calcium/calmodulin-dependent protein kinase II inhibitor 1                         | Camk2g               | 0.28±0.03  |
| calcium/calmodulin-dependent protein kinase II, delta                              | Camk2n1              | 0.48±0.14  |
| calcium/calmodulin-dependent serine protein kinase (MAGUK family)                  | Camk2d               | 0.35±0.14  |
| calcyclin binding protein                                                          | Cask                 | 0.28±0.09  |
| calmodulin 1                                                                       | Cacybp               | 7.98±0.94  |
| calmodulin 2                                                                       | Calm1                | 15±1.57    |
| calmodulin 3                                                                       | Calm2                | 6.29±2.2   |
| calmodulin binding transcription activator 2 (predicted)                           | Calm3                | 4.81±0.69  |
| calmodulin regulated spectrin-associated protein 1                                 | Camta2_predicted     | 1.18±0.32  |
| calnexin                                                                           | Camsap1              | 0.54±0.1   |
| calpain 10                                                                         | Canx                 | 26.56±2.64 |
| calpain 2                                                                          | Capn10               | 0.56±0.19  |
| calpain 7                                                                          | Capn2                | 1.31±0.33  |
| calpain, small subunit 1                                                           | Capn7                | 3.43±0.6   |
| calpastatin                                                                        | Capns1               | 8.23±1.22  |
| calponin 3, acidic                                                                 | Cast                 | 2.26±0.33  |
| calreticulin                                                                       | Cnn3                 | 20.05±0.3  |
| calreticulin 3                                                                     | Calr                 | 15.32±2    |
| calsequestrin 1                                                                    | Calr3                | 0.58±0.13  |
| calsyntenin 1                                                                      | Casq1                | 1.01±0.37  |
| calsyntenin 2                                                                      | Clstn1               | 1.89±0.57  |
| calumenin                                                                          | Clstn2               | 0.31±0.08  |
| camello-like 1                                                                     | Calu                 | 2.31±0.19  |
| Camello-like 2                                                                     | Cml1                 | 4.03±2.04  |
| camello-like 3                                                                     | Cml2                 | 0.68±0.59  |
| camello-like 4                                                                     | Cml3                 | 9.6±3.21   |
| camello-like 5                                                                     | Cml4                 | 6.61±5.11  |
| cAMP responsive element binding protein 3                                          | Cml5                 | 2.06±1.29  |
| cAMP responsive element binding protein 3-like 1                                   | Creb3                | 1±0.12     |
| cAMP responsive element binding protein-like 2                                     | Creb3l1              | 0.86±0.2   |
| cAMP responsive element modulator                                                  | Creb12               | 1.31±0.18  |
| cAMP-regulated phosphoprotein 19                                                   | Crem                 | 2.91±0.26  |
| Cancer susceptibility candidate 3                                                  | Arpp19               | 4.71±0.18  |
| canopy 3 homolog (zebrafish)                                                       | Casc3                | 0.63±0.19  |
| canopy 4 homolog (zebrafish)                                                       | Cnpv3                | 2.35±0.47  |
| CAP, adenylate cyclase-associated protein 1 (yeast)                                | Cnpv4                | 0.31±0.12  |
| CAP-GLY domain containing linker protein 1                                         | Cap1                 | 3.37±0.67  |
| capicua homolog (Drosophila) (predicted)                                           | Clip1                | 0.57±0.1   |
| capping protein (actin filament) muscle Z-line, alpha 1                            | Cic_predicted        | 1.95±0.88  |
| capping protein (actin filament) muscle Z-line, alpha 2                            | Capza1               | 0.84±0.07  |
| capping protein (actin filament) muscle Z-line, beta                               | Capza2               | 7.43±0.88  |
| cappuccino                                                                         | Capzb                | 9.87±0.87  |
| carbamoyl-phosphate synthetase 2, aspartate transcarbamylase, and dihydroorotase   | Cno                  | 2.3±0.24   |
| carbohydrate (N-acetylglactosamine 4-O) sulfotransferase 14                        | Cad                  | 0.24±0.07  |
| carbohydrate sulfotransferase 2 (predicted)                                        | Chst14               | 0.22±0.08  |
| carbonic anhydrase 14                                                              | Chst2_predicted      | 0.3±0.35   |
| carbonic anhydrase 2                                                               | Car14                | 9.98±0.41  |
| carbonic anhydrase 4                                                               | Ca2                  | 30.67±1.61 |
| carbonic anhydrase 6                                                               | Ca4                  | 3.83±0.83  |
| carbonic anhydrase 7 (predicted)                                                   | Car6                 | 0.45±0.06  |
| carbonic anhydrase VB, mitochondrial                                               | Car7_predicted       | 0.45±0.16  |
| carbonyl reductase 4                                                               | Ca5b                 | 10.43±0.82 |
| carboxylesterase 2 (intestine, liver)                                              | Cbr4                 | 4.2±0.4    |
| carboxylesterase 3                                                                 | Ces2                 | 1.95±0.27  |
| carboxymethylenebutenolidase homolog (Pseudomonas)                                 | Ces3                 | 7.89±1.02  |
| carboxypeptidase D                                                                 | Cmb1                 | 44.98±3.04 |
| carboxypeptidase N, polypeptide 1                                                  | Cpd                  | 2.38±0.82  |
| cardiolipin synthase 1                                                             | Cpn1                 | 2.8±0.62   |
| cardiotrophin 1                                                                    | Crls1                | 7.78±0.95  |
|                                                                                    | Ctf1                 | 0.55±0.16  |

|                                                                                                                                        |                       |            |
|----------------------------------------------------------------------------------------------------------------------------------------|-----------------------|------------|
| carnitine acetyltransferase                                                                                                            | Crat                  | 6.44±1.29  |
| carnitine O-octanoyltransferase                                                                                                        | Crot                  | 7.97±0.48  |
| carnitine palmitoyltransferase 1a, liver                                                                                               | Cpt1a                 | 11.01±1.49 |
| carnitine palmitoyltransferase 2                                                                                                       | Cpt2                  | 1.92±0.33  |
| cartilage associated protein                                                                                                           | Crtap                 | 28.51±0.42 |
| casein kinase 1, alpha 1                                                                                                               | Csnk1a1               | 5.44±0.46  |
| casein kinase 1, delta                                                                                                                 | Csnk1d                | 2.56±0.36  |
| casein kinase 1, gamma 2                                                                                                               | Csnk1g2               | 1.22±0.48  |
| casein kinase 1, gamma 3                                                                                                               | Csnk1g3               | 3.8±0.21   |
| casein kinase 2, alpha 1 polypeptide                                                                                                   | Csnk2a1               | 0.92±0.14  |
| casein kinase 2, alpha prime polypeptide                                                                                               | Csnk2a2               | 1.62±0.15  |
| casein kinase 2, beta subunit                                                                                                          | Csnk2b                | 7.58±1.01  |
| caseinolytic peptidase X (E. coli)                                                                                                     | Clpx                  | 13.22±1.34 |
| caseinolytic peptidase, ATP-dependent, proteolytic subunit homolog (E. coli)                                                           | Clpp                  | 2.45±0.41  |
| Casitas B-lineage lymphoma                                                                                                             | Cbl                   | 0.24±0.09  |
| Casitas B-lineage lymphoma-like 1 (predicted)                                                                                          | Cbl11_predicted       | 0.62±0.28  |
| casein-interacting protein 2 (predicted)                                                                                               | Caskin2_predicted     | 0.71±0.23  |
| CASP2 and RIPK1 domain containing adaptor with death domain (predicted)                                                                | Cradd_predicted       | 0.6±0.04   |
| CASP8 and FADD-like apoptosis regulator                                                                                                | Cflar                 | 1.58±0.05  |
| caspase 2                                                                                                                              | Casp2                 | 1.32±0.24  |
| caspase 4, apoptosis-related cysteine peptidase                                                                                        | Casp4                 | 1.14±0.18  |
| caspase 6                                                                                                                              | Casp6                 | 2.42±0.23  |
| caspase 7                                                                                                                              | Casp7                 | 0.94±0.14  |
| caspase 8                                                                                                                              | Casp8                 | 0.25±0.06  |
| caspase 8 associated protein 2 (predicted)                                                                                             | Casp8ap2_predicted    | 0.25±0.06  |
| caspase 9                                                                                                                              | Casp9                 | 0.81±0.05  |
| catalase                                                                                                                               | Cat                   | 41.23±1.27 |
| catechol-O-methyltransferase                                                                                                           | Comt                  | 8.62±2.75  |
| catechol-O-methyltransferase domain containing 1 (predicted)                                                                           | Comtd1_predicted      | 5.23±0.62  |
| catenin (cadherin associated protein), alpha 1                                                                                         | Ctnna1                | 5.16±0.55  |
| catenin (cadherin associated protein), alpha-like 1 (predicted)                                                                        | Ctnnal1_predicted     | 0.46±0.14  |
| Catenin (cadherin associated protein), beta 1                                                                                          | Ctnnb1                | 26.52±2.24 |
| catenin (cadherin associated protein), delta 1 (predicted)                                                                             | Ctnnd1_predicted      | 1.02±0.19  |
| catenin, beta like 1                                                                                                                   | Ctnnb1                | 1.66±0.29  |
| catenin, beta-interacting protein 1                                                                                                    | Ctnnbp1               | 0.7±0.08   |
| cathepsin B                                                                                                                            | Ctsb                  | 58.39±2.96 |
| cathepsin C                                                                                                                            | Ctsc                  | 15.58±1.36 |
| cathepsin D                                                                                                                            | Ctsd                  | 10.96±2.93 |
| cathepsin F                                                                                                                            | Ctsf                  | 2.77±0.28  |
| cathepsin H                                                                                                                            | Ctsh                  | 67.72±2.58 |
| cathepsin L                                                                                                                            | Ctsl                  | 80.29±8.69 |
| CBF1 interacting corepressor                                                                                                           | Cir                   | 0.88±0.15  |
| Cbp/p300-interacting transactivator, with Glu/Asp-rich carboxy-terminal domain, 2                                                      | Cited2                | 5.18±0.81  |
| CCAAT/enhancer binding protein (C/EBP), gamma                                                                                          | Cebpg                 | 0.64±0.05  |
| CCAAT/enhancer binding protein zeta (predicted)                                                                                        | Cebpz_predicted       | 2.5±0.32   |
| CCCTC-binding factor                                                                                                                   | Ctcf                  | 2.01±0.16  |
| CCR4-NOT transcription complex, subunit 10                                                                                             | Cnot10                | 1.28±0.11  |
| CCR4-NOT transcription complex, subunit 2                                                                                              | Cnot2                 | 3.59±0.16  |
| CCR4-NOT transcription complex, subunit 4                                                                                              | Cnot4                 | 0.68±0.15  |
| CCR4-NOT transcription complex, subunit 6                                                                                              | Cnot6                 | 1.36±0.15  |
| CCR4-NOT transcription complex, subunit 6-like (predicted)                                                                             | Cnot6l_predicted      | 0.62±0.17  |
| CCR4-NOT transcription complex, subunit 7 (predicted)                                                                                  | Cnot7_predicted       | 2.19±0.29  |
| CCR4-NOT transcription complex, subunit 8                                                                                              | Cnot8                 | 0.76±0.1   |
| CD 81 antigen                                                                                                                          | Cd81                  | 2.73±1.95  |
| CD14 antigen                                                                                                                           | Cd14                  | 0.37±0.11  |
| CD151 antigen (Raph blood group)                                                                                                       | Cd151                 | 7.92±1.33  |
| CD164 antigen                                                                                                                          | Cd164                 | 32.83±2.33 |
| CD1d1 antigen                                                                                                                          | Cd1d1                 | 0.46±0.05  |
| CD2 antigen (cytoplasmic tail) binding protein 2 (predicted)                                                                           | Cd2bp2_predicted      | 2.9±0.38   |
| CD302 antigen                                                                                                                          | Cd302                 | 2.7±0.89   |
| CD320 antigen                                                                                                                          | Cd320                 | 3.55±0.2   |
| CD48 antigen                                                                                                                           | Cd48                  | 4.65±0.76  |
| CD59 antigen                                                                                                                           | Cd59                  | 2.63±1.82  |
| CD63 antigen                                                                                                                           | Cd63                  | 58.79±3.83 |
| CD74 antigen (invariant polypeptide of major histocompatibility complex, class II antigen-associated)                                  | Cd74                  | 18.51±8.29 |
| CD82 antigen                                                                                                                           | Cd82                  | 4.58±0.85  |
| CD99 antigen                                                                                                                           | Cd99                  | 1.84±0.74  |
| Cd99 antigen-like 2                                                                                                                    | Cd99l2                | 2.65±0.14  |
| CDC like kinase 4                                                                                                                      | Clk4                  | 3.83±0.58  |
| CDC16 cell division cycle 16 homolog (S. cerevisiae)                                                                                   | Cdc16                 | 1.62±0.11  |
| CDC23 (cell division cycle 23, yeast, homolog)                                                                                         | Cdc23                 | 0.48±0.13  |
| CDC28 protein kinase regulatory subunit 2                                                                                              | Cks2                  | 1.68±0.8   |
| Cdc2-related kinase, arginine/serine-rich                                                                                              | Crkr2                 | 0.56±0.04  |
| Cdc42 binding protein kinase beta                                                                                                      | Cdc42bbp              | 0.98±0.12  |
| Cdc42 guanine nucleotide exchange factor (GEF) 9                                                                                       | Arhgef9               | 0.62±0.07  |
| CDC42 small effector 1                                                                                                                 | Cdc42se1              | 2.02±0.21  |
| CDC42 small effector 2                                                                                                                 | Cdc42se2              | 2.3±0.2    |
| CDC91 cell division cycle 91-like 1 (S. cerevisiae)                                                                                    | Cdc91l1               | 0.77±0.1   |
| CDC-like kinase 1                                                                                                                      | Clk1                  | 5.01±1.75  |
| CDC-like kinase 2                                                                                                                      | Clk2                  | 0.29±0.06  |
| CDC-like kinase 3                                                                                                                      | Clk3                  | 1.53±0.13  |
| CDGSH iron sulfur domain 1                                                                                                             | Cisd1                 | 40.21±2.27 |
| CDGSH iron sulfur domain 2                                                                                                             | Cisd2                 | 5.21±0.44  |
| CDK105 protein                                                                                                                         | Cdk105                | 5.57±1.62  |
| CDK2 (cyclin-dependent kinase 2)-associated protein 1 (predicted) /// similar to CDK2 (cyclin-dependent kinase 2)-associated protein 1 | Cdk2ap1_predicted /// | 5.97±0.48  |
|                                                                                                                                        | LOC687549             |            |
| CDK5 regulatory subunit associated protein 1-like 1 (predicted)                                                                        | Cdkal1_predicted      | 0.61±0.09  |

|                                                                                                        |                         |            |
|--------------------------------------------------------------------------------------------------------|-------------------------|------------|
| CDK5 regulatory subunit associated protein 2                                                           | Cdk5rap2                | 0.53±0.11  |
| CDKN1A interacting zinc finger protein 1 (predicted)                                                   | Ciz1_predicted          | 0.89±0.11  |
| CDKN2A interacting protein                                                                             | Cdkn2aip                | 0.64±0.14  |
| CDKN2A interacting protein N-terminal like                                                             | Cdkn2aipnl              | 1.52±0.19  |
| CDP-diacylglycerol--inositol 3-phosphatidyltransferase (phosphatidylinositol synthase)                 | Cdipt                   | 4.8±0.52   |
| CDW92 antigen                                                                                          | Cdw92                   | 1.14±0.26  |
| CEA-related cell adhesion molecule 1                                                                   | Ceacam1                 | 2.07±0.1   |
| cell adhesion molecule 1                                                                               | Cadm1                   | 0.32±0.07  |
| cell adhesion molecule JCAM                                                                            | LOC304000               | 2.12±0.79  |
| cell cycle associated protein 1                                                                        | Caprin1                 | 10.09±0.35 |
| cell cycle progression 1 (predicted)                                                                   | Ccp1_predicted          | 0.67±0.15  |
| cell cycle related kinase                                                                              | Ccrk                    | 0.61±0.07  |
| cell death-inducing DNA fragmentation factor, alpha subunit-like effector B (predicted)                | Cideb_predicted         | 7.74±0.91  |
| cell division cycle 123 homolog (S. cerevisiae)                                                        | Cdc123                  | 3.37±0.32  |
| cell division cycle 2 homolog (S.pombe)-like 1 /// similar to cell division cycle 2-like 1 (predicted) | Cdc211 ///              | 1.84±0.4   |
|                                                                                                        | RGD1566355 predicted    |            |
| cell division cycle 2 homolog A (S. pombe)                                                             | Cdc2a                   | 0.79±0.25  |
| cell division cycle 20 homolog (S. cerevisiae)                                                         | Cdc20                   | 0.33±0.19  |
| cell division cycle 25 homolog A (S. pombe)                                                            | Cdc25a                  | 0.52±0.08  |
| cell division cycle 26                                                                                 | Cdc26                   | 1.38±0.07  |
| cell division cycle 27 homolog (S. cerevisiae)                                                         | Cdc27                   | 0.28±0.1   |
| cell division cycle 2-like 5 (cholinesterase-related cell division controller)                         | Cdc2l5                  | 0.91±0.15  |
| cell division cycle 2-like 6 (CDK8-like) (predicted)                                                   | Cdc2l6_predicted        | 0.54±0.2   |
| cell division cycle 34 homolog (S. cerevisiae) (predicted)                                             | Cdc34_predicted         | 2.2±0.16   |
| cell division cycle 37 homolog (S. cerevisiae)                                                         | Cdc37                   | 6.42±0.59  |
| cell division cycle 37 homolog (S. cerevisiae)-like 1                                                  | Cdc37l1                 | 1.74±0.35  |
| cell division cycle 40 homolog (yeast) (predicted)                                                     | Cdc40_predicted         | 1.49±0.21  |
| cell division cycle 42 homolog (S. cerevisiae)                                                         | Cdc42                   | 21.54±2.61 |
| cell division cycle 45 homolog (S. cerevisiae)-like                                                    | Cdc45l                  | 0.43±0.1   |
| cell division cycle 5-like (S. pombe)                                                                  | Cdc5l                   | 4.01±0.4   |
| cell division cycle 73, Paf1/RNA polymerase II complex component, homolog (S. cerevisiae)              | Cdc73                   | 4.33±0.12  |
| cell division cycle and apoptosis regulator 1                                                          | Ccar1                   | 4.31±0.85  |
| cell division cycle associated 3                                                                       | Cdca3                   | 0.94±0.28  |
| cell division cycle associated 4                                                                       | Cdca4                   | 0.54±0.37  |
| cell growth regulator with ring finger domain 1                                                        | Cgrff1                  | 3.51±0.83  |
| cellular nucleic acid binding protein                                                                  | Cnbp                    | 9.3±2.57   |
| cellular repressor of E1A-stimulated genes 1                                                           | Creg1                   | 5.23±0.7   |
| centaurin, alpha 2                                                                                     | Centa2                  | 5.7±0.96   |
| centaurin, beta 5 (predicted)                                                                          | Centb5_predicted        | 0.36±0.18  |
| centaurin, delta 1 (predicted)                                                                         | Centd1_predicted        | 0.68±0.11  |
| centaurin, delta 2                                                                                     | Centd2                  | 0.3±0.22   |
| centaurin, gamma 2 (predicted)                                                                         | Centg2_predicted        | 1.33±0.24  |
| centaurin, gamma 3 (predicted)                                                                         | Centg3_predicted        | 0.69±0.09  |
| centrin 2                                                                                              | Cetn2                   | 5.41±0.59  |
| centrin 3                                                                                              | Cetn3                   | 2.95±0.29  |
| centromere protein B                                                                                   | Cenpb                   | 0.89±0.41  |
| centromere protein J (predicted)                                                                       | Cenpj_predicted         | 0.23±0.03  |
| centromere protein K                                                                                   | Cenpk                   | 0.32±0.12  |
| centromere protein L                                                                                   | Cenpl                   | 0.35±0.33  |
| centromere protein N                                                                                   | Cenpn                   | 0.89±0.11  |
| centrosomal protein 152 (predicted)                                                                    | Cep152_predicted        | 0.49±0.35  |
| centrosomal protein 164                                                                                | Cep164                  | 0.47±0.1   |
| centrosomal protein 250                                                                                | Cep250                  | 0.64±0.19  |
| centrosomal protein 27 (predicted)                                                                     | Cep27_predicted         | 0.73±0.18  |
| centrosomal protein 27 (predicted) /// similar to Centrosomal protein of 27 kDa (Cep27 protein)        | Cep27_predicted ///     | 1.09±0.06  |
|                                                                                                        | LOC691918               |            |
| centrosomal protein 57                                                                                 | Cep57                   | 1.26±0.19  |
| centrosomal protein 68 (predicted)                                                                     | Cep68_predicted         | 0.26±0.06  |
| centrosomal protein 70                                                                                 | Cep70                   | 0.95±0.21  |
| centrosomal protein 78                                                                                 | Cep78                   | 0.55±0.03  |
| cerebellar degeneration-related 2                                                                      | Cdr2                    | 3.55±0.23  |
| cereblon                                                                                               | Crbn                    | 5.06±0.59  |
| ceroid lipofuscinosis, neuronal 3, juvenile (Batten, Spielmeier-Vogt disease)                          | Cln3                    | 0.8±0.08   |
| ceroid-lipofuscinosis, neuronal 5 (predicted)                                                          | Cln5_predicted          | 0.72±0.13  |
| ceroid-lipofuscinosis, neuronal 8                                                                      | Cln8                    | 0.74±0.48  |
| CGG triplet repeat binding protein 1 (predicted)                                                       | Cggbp1_predicted        | 2.13±0.24  |
| CGI-96 protein                                                                                         | Cgi-96                  | 0.4±0.06   |
| ChaC, cation transport regulator homolog 2 (E. coli)                                                   | Chac2                   | 0.91±0.3   |
| ChaC, cation transport regulator-like 1 (E. coli) (predicted)                                          | Chac1_predicted         | 0.27±0.12  |
| chaperonin containing TCP1, subunit 2 (beta)                                                           | Cct2                    | 8.98±1.25  |
| chaperonin subunit 3 (gamma)                                                                           | Cct3                    | 8.98±0.44  |
| chaperonin subunit 4 (delta)                                                                           | Cct4                    | 8.1±0.25   |
| chaperonin subunit 5 (epsilon)                                                                         | Cct5                    | 11.3±0.51  |
| Chaperonin subunit 6a (zeta)                                                                           | Cct6a                   | 0.56±0.12  |
| chaperonin subunit 6a (zeta) /// similar to chaperonin subunit 6a (zeta)                               | Cct6a /// LOC316484 /// | 11.68±1.19 |
|                                                                                                        | LOC688183               |            |
| chaperonin subunit 7 (eta) (predicted)                                                                 | Cct7_predicted          | 8.1±0.32   |
| chaperonin subunit 8 (theta) (predicted)                                                               | Cct8_predicted          | 7.57±1.66  |
| Checkpoint suppressor 1 (predicted)                                                                    | Ches1_predicted         | 0.45±0.09  |
| checkpoint with forkhead and ring finger domains                                                       | Chfr                    | 1.38±0.05  |
| chemokine (C-C motif) ligand 27 (predicted)                                                            | Ccl27_predicted         | 0.26±0.09  |
| chemokine (C-X3-C motif) ligand 1                                                                      | Cx3cl1                  | 1.4±0.49   |
| chemokine (C-X-C motif) ligand 11                                                                      | Cxcl11                  | 2.66±0.22  |
| chemokine (C-X-C motif) ligand 16                                                                      | Cxcl16                  | 15.64±0.98 |
| chemokine-like factor                                                                                  | Cklf                    | 1.05±0.16  |
| chibby homolog 1 (Drosophila)                                                                          | Cby1                    | 1.2±0.18   |
| chitinase domain containing 1                                                                          | Chid1                   | 0.88±0.16  |

|                                                                                 |                  |            |
|---------------------------------------------------------------------------------|------------------|------------|
| chitinase, di-N-acetyl-                                                         | Ctbs             | 8.09±0.74  |
| chloride channel 2                                                              | Clcn2            | 0.76±0.2   |
| chloride channel 3                                                              | Clcn3            | 2.63±1.37  |
| chloride channel 4-2                                                            | Clcn4-2          | 7.75±0.42  |
| Chloride channel 6 (predicted)                                                  | Clcn6_predicted  | 10.47±1.65 |
| chloride channel 7                                                              | Clcn7            | 0.44±0.04  |
| chloride channel calcium activated 5                                            | Clca5            | 0.31±0.12  |
| chloride channel CLIC-like 1                                                    | Clcc1            | 0.77±0.15  |
| chloride channel, nucleotide-sensitive, 1A                                      | Clns1a           | 2.71±0.16  |
| chloride intracellular channel 1                                                | Clc1             | 9.82±0.56  |
| chloride intracellular channel 4 (mitochondrial)                                | Clc4             | 2.21±0.18  |
| CHMP family, member 7 (predicted)                                               | Chmp7_predicted  | 1.67±0.37  |
| choline dehydrogenase                                                           | Chdh             | 5.84±1.76  |
| choline kinase alpha                                                            | Chka             | 1.1±0.14   |
| choline kinase beta                                                             | Chkb             | 2.86±0.29  |
| choline phosphotransferase 1                                                    | Chpt1            | 40.07±2.29 |
| choline/ethanolamine phosphotransferase 1                                       | Cept1            | 7.07±0.71  |
| chondroitin polymerizing factor                                                 | Chpf             | 0.57±0.12  |
| chordin                                                                         | Chrd             | 0.9±0.17   |
| choroideremia                                                                   | Chm              | 0.52±0.07  |
| chromatin accessibility complex 1 (predicted)                                   | Chrac1_predicted | 2.89±0.3   |
| chromatin modifying protein 1A                                                  | Chmp1a           | 2.36±0.16  |
| chromatin modifying protein 1B                                                  | Chmp1b           | 1.88±0.23  |
| chromatin modifying protein 2B                                                  | Chmp2b           | 0.98±0.84  |
| chromatin modifying protein 4C                                                  | Chmp4c           | 2.05±0.13  |
| chromatin modifying protein 5                                                   | Chmp5            | 12.29±0.16 |
| chromatin modifying protein 6 (predicted)                                       | Chmp6_predicted  | 2.07±0.23  |
| chromobox homolog 1 (Drosophila HP1 beta) (predicted)                           | Cbx1_predicted   | 2.23±0.36  |
| chromobox homolog 3 (HP1 gamma homolog, Drosophila)                             | Cbx3             | 7.08±0.46  |
| chromobox homolog 5 (Drosophila HP1a) (predicted)                               | Cbx5_predicted   | 0.22±0.05  |
| chromobox homolog 6                                                             | Cbx6             | 2.15±0.41  |
| chromobox homolog 7                                                             | Cbx7             | 0.72±0.32  |
| chromodomain helicase DNA binding protein 1 (predicted)                         | Chd1_predicted   | 1.33±0.09  |
| chromodomain helicase DNA binding protein 1-like (predicted)                    | Chd11_predicted  | 11.17±1.99 |
| Chromodomain helicase DNA binding protein 2 (predicted)                         | Chd2_predicted   | 1.53±0.29  |
| Chromodomain helicase DNA binding protein 3                                     | Chd3             | 1.05±0.15  |
| chromodomain helicase DNA binding protein 4                                     | Chd4             | 5.9±0.65   |
| chromodomain helicase DNA binding protein 7 (predicted)                         | Chd7_predicted   | 0.71±0.03  |
| chromodomain helicase DNA binding protein 8                                     | Chd8             | 1.55±0.38  |
| chromosome segregation 1-like (S. cerevisiae) (predicted)                       | Cse11_predicted  | 2.72±0.03  |
| chromosome transmission fidelity factor 8 homolog (S. cerevisiae)               | Ctf8             | 1.95±0.04  |
| churchill domain containing 1 (predicted)                                       | Churc1_predicted | 8.62±0.17  |
| ciliary neurotrophic factor                                                     | Cntf             | 0.42±0.07  |
| cingulin (predicted)                                                            | Cgn_predicted    | 0.31±0.14  |
| cingulin-like 1                                                                 | Cgn1             | 27.53±4.28 |
| cirrhosis, autosomal recessive 1A (human)                                       | Cirh1a           | 9.47±0.67  |
| cisplatin resistance-associated overexpressed protein                           | Crop             | 4.76±0.47  |
| citrate lyase beta like                                                         | Clybl            | 3.83±0.31  |
| Citrate synthase                                                                | Cs               | 16.71±0.72 |
| CKLF-like MARVEL transmembrane domain containing 6                              | Cmtm6            | 7.11±0.7   |
| clarin 3                                                                        | Clrn3            | 10.26±0.9  |
| clathrin, heavy polypeptide (Hc)                                                | Cltc             | 32.19±0.92 |
| clathrin, light polypeptide (Lca)                                               | Cltc             | 19.13±0.32 |
| clathrin, light polypeptide (Lcb)                                               | Cltb             | 1.4±0.44   |
| claudin 1                                                                       | Cldn1            | 0.83±0.09  |
| claudin 10 (predicted)                                                          | Cldn10_predicted | 23.24±1.35 |
| claudin 12                                                                      | Cldn12           | 2.91±0.52  |
| claudin 2 (predicted)                                                           | Cldn2_predicted  | 23.01±3.17 |
| claudin domain containing 1                                                     | Cldnd1           | 2.31±0.24  |
| cleavage and polyadenylation factor subunit homolog (S. cerevisiae) (predicted) | Pcf11_predicted  | 0.82±0.11  |
| cleavage and polyadenylation specific factor 1                                  | Cpsf1            | 1.11±0.2   |
| cleavage and polyadenylation specific factor 2 (predicted)                      | Cpsf2_predicted  | 1.49±0.32  |
| cleavage and polyadenylation specific factor 3-like                             | Cpsf3l           | 0.91±0.09  |
| cleavage and polyadenylation specific factor 5                                  | Cpsf5            | 3.63±0.28  |
| cleavage and polyadenylation specific factor 6                                  | Cpsf6            | 1.45±0.66  |
| cleavage and polyadenylation specificity factor 3                               | Cpsf3            | 3.91±0.51  |
| cleavage stimulation factor, 3' pre-RNA subunit 2, tau (predicted)              | Cstf2t_predicted | 5.42±0.19  |
| cleavage stimulation factor, 3' pre-RNA, subunit 1                              | Cstf1            | 0.62±0.03  |
| left lip and palate associated transmembrane protein 1 (predicted)              | Clptm1_predicted | 7.77±0.6   |
| CLIP associating protein 2                                                      | Clasp2           | 1.36±0.29  |
| CLP1, cleavage and polyadenylation factor I subunit, homolog (S. cerevisiae)    | Cjp1             | 0.61±0.11  |
| ClpB caseinolytic peptidase B homolog (E. coli)                                 | Clpb             | 2.8±0.1    |
| CLPTM1-like                                                                     | Clptm1l          | 12.32±2.37 |
| clusterin associated protein 1                                                  | Cluap1           | 3.28±0.03  |
| c-Maf-inducing protein                                                          | Cmp              | 5.52±0.66  |
| CNDP dipeptidase 2 (metallopeptidase M20 family)                                | Cndp2            | 15.94±2.09 |
| Cnksr family member 3                                                           | Cnksr3           | 0.73±0.06  |
| coactosin-like 1 (Dictyostelium) (predicted)                                    | Cotl1_predicted  | 15.3±3.14  |
| coagulation factor III                                                          | F3               | 11.64±1.83 |
| coagulation factor V                                                            | F5               | 0.25±0.1   |
| coatamer protein complex subunit alpha                                          | Copa             | 9.67±0.65  |
| coatamer protein complex, subunit beta 1                                        | Copb1            | 6.97±0.71  |
| coatamer protein complex, subunit beta 2 (beta prime)                           | Copb2            | 8.41±0.81  |
| coatamer protein complex, subunit epsilon (predicted)                           | Cope_predicted   | 3.79±0.99  |
| coatamer protein complex, subunit gamma                                         | Copg             | 4.31±0.08  |
| coatamer protein complex, subunit zeta 1 (predicted)                            | Copz1_predicted  | 5.97±1.47  |
| Cobl-like 1 (predicted)                                                         | Cobl1_predicted  | 7.01±0.94  |

|                                                                                   |                        |            |
|-----------------------------------------------------------------------------------|------------------------|------------|
| COBW domain containing 1                                                          | Cbwd1                  | 0.43±0.14  |
| Coenzyme A synthase                                                               | Coasy                  | 1.42±0.05  |
| coenzyme Q10 homolog A (yeast) (predicted)                                        | Coq10a_predicted       | 1.81±0.2   |
| coenzyme Q10 homolog B (S. cerevisiae)                                            | Coq10b                 | 5.7±1.41   |
| coenzyme Q2 homolog, prenyltransferase (yeast)                                    | Coq2                   | 0.93±0.1   |
| coenzyme Q3 homolog, methyltransferase (yeast)                                    | Coq3                   | 2.08±0.25  |
| coenzyme Q4 homolog (yeast)                                                       | Coq4                   | 0.62±0.09  |
| coenzyme Q5 homolog, methyltransferase (yeast)                                    | Coq5                   | 0.82±0.15  |
| Coenzyme Q6 homolog (yeast)                                                       | Coq6                   | 12.07±1.54 |
| cofactor of BRCA1                                                                 | Cobra1                 | 1.69±0.22  |
| cofilin 1, non-muscle                                                             | Cfl1                   | 18.44±2.13 |
| cofilin 1, non-muscle                                                             | Cfl1 /// LOC502589 /// | 1.02±0.25  |
|                                                                                   | LOC688430 ///          |            |
|                                                                                   | RGD1563644 predicted   |            |
| cofilin 2, muscle (predicted)                                                     | Cfl2_predicted         | 10.83±1.2  |
| Cohen syndrome homolog 1 (predicted)                                              | Cohn1_predicted        | 2.04±0.22  |
| coiled-coil and C2 domain containing 1A                                           | Cc2d1a                 | 0.53±0.4   |
| coiled-coil and C2 domain containing 1B                                           | Cc2d1b                 | 1.25±0.05  |
| coiled-coil domain containing 100                                                 | Ccdc100                | 0.85±0.05  |
| coiled-coil domain containing 101                                                 | Ccdc101                | 0.69±0.09  |
| coiled-coil domain containing 104                                                 | Ccdc104                | 1.52±0.28  |
| coiled-coil domain containing 107                                                 | Ccdc107                | 1.02±0.04  |
| coiled-coil domain containing 115                                                 | Ccdc115                | 0.68±0.12  |
| coiled-coil domain containing 117                                                 | Ccdc117                | 0.44±0.09  |
| coiled-coil domain containing 12 (predicted)                                      | Ccdc12_predicted       | 0.96±0.11  |
| coiled-coil domain containing 124                                                 | Ccdc124                | 1.36±0.41  |
| coiled-coil domain containing 126                                                 | Ccdc126                | 2.43±0.21  |
| coiled-coil domain containing 127                                                 | Ccdc127                | 0.53±0.12  |
| coiled-coil domain containing 130                                                 | Ccdc130                | 0.51±0.13  |
| coiled-coil domain containing 132                                                 | Ccdc132                | 3.39±0.18  |
| coiled-coil domain containing 16                                                  | Ccdc16                 | 0.62±0.2   |
| coiled-coil domain containing 17                                                  | Ccdc17                 | 2.01±0.33  |
| coiled-coil domain containing 21                                                  | Ccdc21                 | 0.8±0.24   |
| coiled-coil domain containing 22 (predicted)                                      | Ccdc22_predicted       | 1.88±0.29  |
| coiled-coil domain containing 25 (predicted)                                      | Ccdc25_predicted       | 0.68±0.07  |
| coiled-coil domain containing 28A                                                 | Ccdc28a                | 0.78±0.18  |
| coiled-coil domain containing 32                                                  | Ccdc32                 | 0.3±0.05   |
| coiled-coil domain containing 41                                                  | Ccdc41                 | 0.62±0.13  |
| coiled-coil domain containing 43                                                  | Ccdc43                 | 1.65±0.06  |
| coiled-coil domain containing 45                                                  | Ccdc45                 | 0.26±0.04  |
| coiled-coil domain containing 51                                                  | Ccdc51                 | 0.67±0.11  |
| coiled-coil domain containing 52                                                  | Ccdc52                 | 0.89±0.25  |
| coiled-coil domain containing 53 (predicted)                                      | Ccdc53_predicted       | 23.85±1.94 |
| coiled-coil domain containing 55                                                  | Ccdc55                 | 0.23±0.07  |
| coiled-coil domain containing 56                                                  | Ccdc56                 | 10.85±0.35 |
| coiled-coil domain containing 58 (predicted)                                      | Ccdc58_predicted       | 2.23±0.54  |
| coiled-coil domain containing 59 (predicted)                                      | Ccdc59_predicted       | 0.56±0.16  |
| coiled-coil domain containing 65                                                  | Ccdc65                 | 0.34±0.03  |
| coiled-coil domain containing 68                                                  | Ccdc68                 | 0.65±0.12  |
| coiled-coil domain containing 72 /// hypothetical protein LOC685117               | Ccdc72 /// LOC685117   | 15.22±3.24 |
| coiled-coil domain containing 84                                                  | Ccdc84                 | 0.81±0.05  |
| coiled-coil domain containing 86                                                  | Ccdc86                 | 0.3±0.04   |
| coiled-coil domain containing 90A                                                 | Ccdc90a                | 0.4±0.22   |
| coiled-coil domain containing 90B                                                 | Ccdc90b                | 1.89±0.17  |
| coiled-coil domain containing 91                                                  | Ccdc91                 | 1.9±0.12   |
| coiled-coil domain containing 92                                                  | Ccdc92                 | 0.46±0.25  |
| coiled-coil domain containing 93                                                  | Ccdc93                 | 0.39±0.06  |
| coiled-coil domain containing 95                                                  | Ccdc95                 | 0.32±0.15  |
| coiled-coil domain containing 96                                                  | Ccdc96                 | 0.26±0.03  |
| coiled-coil domain containing 97                                                  | Ccdc97                 | 1.19±0.4   |
| coiled-coil domain containing 98                                                  | Ccdc98                 | 0.67±0.08  |
| coiled-coil domain containing 99                                                  | Ccdc99                 | 0.8±0.09   |
| coiled-coil-helix-coiled-coil-helix domain containing 1 (predicted)               | Chchd1_predicted       | 4.68±0.35  |
| coiled-coil-helix-coiled-coil-helix domain containing 2                           | Chchd2                 | 40.33±2.46 |
| coiled-coil-helix-coiled-coil-helix domain containing 3 (predicted)               | Chchd3_predicted       | 8.4±0.87   |
| coiled-coil-helix-coiled-coil-helix domain containing 4                           | Chchd4                 | 1.98±0.39  |
| coiled-coil-helix-coiled-coil-helix domain containing 5 (predicted)               | Chchd5_predicted       | 2.12±0.4   |
| coiled-coil-helix-coiled-coil-helix domain containing 6 (predicted)               | Chchd6_predicted       | 0.33±0.31  |
| coiled-coil-helix-coiled-coil-helix domain containing 8                           | Chchd8                 | 2.59±0.11  |
| cold inducible RNA binding protein                                                | Cirbp                  | 0.9±0.1    |
| cold shock domain containing E1, RNA binding                                      | Csde1                  | 12.66±1.37 |
| collagen, type IV, alpha 5                                                        | Col4a5                 | 7.15±0.24  |
| colony stimulating factor 1 (macrophage)                                          | Csf1                   | 1.75±0.42  |
| colony stimulating factor 2 receptor, beta, low-affinity (granulocyte-macrophage) | Csf2rb                 | 0.79±0.2   |
| COMM domain containing 10                                                         | Comm10                 | 5.06±0.19  |
| COMM domain containing 2                                                          | Comm2                  | 1.52±0.01  |
| COMM domain containing 3                                                          | Comm3                  | 16.57±2.3  |
| COMM domain containing 4 (predicted)                                              | Comm4_predicted        | 2.91±0.22  |
| COMM domain containing 5                                                          | Comm5                  | 1.28±0.22  |
| COMM domain containing 6                                                          | Comm6                  | 3.25±0.09  |
| COMM domain containing 7                                                          | Comm7                  | 0.62±0.07  |
| COMM domain containing 8 (predicted)                                              | Comm8_predicted        | 6.72±0.59  |
| COMM domain containing 9                                                          | Comm9                  | 6.09±0.91  |
| complement component (3b/4b) receptor 1-like                                      | Cr1l                   | 6.15±0.52  |
| complement component 1, q subcomponent binding protein                            | C1qbp                  | 12.45±1.24 |

|                                                                                                    |                                 |            |
|----------------------------------------------------------------------------------------------------|---------------------------------|------------|
| complement component 2                                                                             | Bat4 /// C2 /// C4a /// Cfb /// | 1.94±0.16  |
|                                                                                                    | Clc1 /// Ehmt2 ///              |            |
|                                                                                                    | LOC684148 /// Lsm2 ///          |            |
|                                                                                                    | Ly6g6c /// Ly6g6e /// Neu1      |            |
|                                                                                                    | /// Ng23 /// Rdbp /// Skiv2l    |            |
|                                                                                                    | /// Srv1a                       |            |
| complement component 4a                                                                            | Ager /// Agpat1 /// Btl17 ///   | 5.8±0.84   |
|                                                                                                    | Btl18 /// C4-2 /// C4a ///      |            |
|                                                                                                    | Crebl1 /// LOC686977 ///        |            |
|                                                                                                    | Natch4 /// Phx2                 |            |
| complement component 5                                                                             | C5                              | 10.6±0.92  |
| complement component 8, beta polypeptide                                                           | C8b                             | 0.51±0.14  |
| complement component 8, gamma subunit                                                              | C8g                             | 0.75±0.15  |
| complement factor I                                                                                | Cfi                             | 0.36±0.06  |
| component of oligomeric golgi complex 1 (predicted)                                                | Coq1_predicted                  | 1.78±0.21  |
| component of oligomeric golgi complex 3                                                            | Cog3                            | 0.56±0.12  |
| component of oligomeric golgi complex 4 (predicted)                                                | Cog4_predicted                  | 2.07±0.43  |
| component of oligomeric golgi complex 6                                                            | Coq6                            | 1.28±0.26  |
| component of oligomeric golgi complex 7                                                            | Cog7                            | 2.61±0.12  |
| connective tissue growth factor                                                                    | Ctgf                            | 0.3±4.81   |
| conserved helix-loop-helix ubiquitous kinase (predicted)                                           | Chuk_predicted                  | 15.84±2.34 |
| conserved nuclear protein Nhn1                                                                     | Nhn1                            | 0.57±0.27  |
| COP9 (constitutive photomorphogenic) homolog, subunit 2 (Arabidopsis thaliana)                     | Cops2                           | 10.24±1.08 |
| COP9 (constitutive photomorphogenic) homolog, subunit 3 (Arabidopsis thaliana)                     | Cops3                           | 4.38±0.58  |
| COP9 (constitutive photomorphogenic) homolog, subunit 4 (Arabidopsis thaliana)                     | Cops4                           | 8.26±0.09  |
| COP9 (constitutive photomorphogenic) homolog, subunit 5 (Arabidopsis thaliana)                     | Cops5                           | 3.96±0.73  |
| COP9 (constitutive photomorphogenic) homolog, subunit 6 (Arabidopsis thaliana) (predicted)         | Cops6_predicted                 | 8.01±0.26  |
| COP9 (constitutive photomorphogenic) homolog, subunit 7a (Arabidopsis thaliana) (predicted)        | Cops7a_predicted                | 3.85±0.28  |
| COP9 (constitutive photomorphogenic) homolog, subunit 7b (Arabidopsis thaliana) (predicted)        | Cops7b_predicted                | 0.69±0.19  |
| COP9 (constitutive photomorphogenic) homolog, subunit 8 (Arabidopsis thaliana)                     | Cops8                           | 5.31±0.26  |
| Copine III (predicted)                                                                             | Cpne3_predicted                 | 2.09±0.41  |
| copper chaperone for superoxide dismutase                                                          | Ccs                             | 5.22±0.48  |
| copper metabolism (Murr1) domain containing 1 (predicted)                                          | Comm1_predicted                 | 3.04±0.06  |
| coproporphyrinogen oxidase                                                                         | Cpox                            | 2.05±0.31  |
| core 1 synthase, glycoprotein-N-acetylgalactosamine 3-beta-galactosyltransferase, 1                | C1gal1                          | 0.75±0.12  |
| core binding factor beta                                                                           | Cbfb                            | 2.63±0.29  |
| cornichon homolog (Drosophila) (predicted)                                                         | Cnih_predicted                  | 8.21±1.1   |
| cornichon homolog 4 (Drosophila)                                                                   | Cnih4                           | 3.19±0.27  |
| coronin 7                                                                                          | Coro7                           | 2.55±0.29  |
| coronin, actin binding protein 1C                                                                  | Coro1c                          | 3.02±0.08  |
| coronin, actin-binding protein, 1B                                                                 | Coro1b                          | 2.16±0.14  |
| cortactin                                                                                          | Cttn                            | 5.14±0.22  |
| cortactin binding protein 2                                                                        | Cttnbp2                         | 1.17±0.06  |
| cortistatin                                                                                        | Cort                            | 0.39±0.17  |
| cortistatin /// phosphogluconate dehydrogenase                                                     | Cort /// Pgd                    | 2.35±1.02  |
| COX15 homolog, cytochrome c oxidase assembly protein (yeast)                                       | Cox15                           | 4.56±0.23  |
| COX18 cytochrome c oxidase assembly homolog (S. cerevisiae)                                        | Cox18                           | 2.06±0.1   |
| COX19 cytochrome c oxidase assembly homolog (S. cerevisiae)                                        | Cox19                           | 2.07±0.3   |
| COX4 neighbor                                                                                      | Cox4nb                          | 1.4±0.01   |
| COXII /// cytochrome c oxidase subunit 3                                                           | COX2 /// COX3                   | 68.86±6.42 |
| CP110 protein                                                                                      | Cp110                           | 0.29±0.2   |
| craniofacial development protein 1                                                                 | Cfdp1                           | 1.65±0.11  |
| CREB binding protein                                                                               | Crebbp                          | 1.23±0.22  |
| CREB regulated transcription coactivator 2                                                         | Crtc2                           | 0.6±0.1    |
| Crn, crooked neck-like 1 (Drosophila)                                                              | Crnk1                           | 1.24±0.19  |
| crumbs homolog 3 (Drosophila)                                                                      | Crb3                            | 1.89±0.64  |
| crystallin, gamma A                                                                                | Cryga                           | 1.38±1.05  |
| crystallin, lambda 1                                                                               | Cryl1                           | 33.61±2.65 |
| crystallin, mu                                                                                     | Crym                            | 23.55±1.8  |
| crystallin, zeta                                                                                   | Cryz                            | 17.69±0.82 |
| crystallin, zeta (quinone reductase)-like 1                                                        | Cryz1                           | 1.04±0.05  |
| c-src tyrosine kinase                                                                              | Csk                             | 0.31±0.11  |
| CTAGE family, member 5                                                                             | Ctage5                          | 11.77±2.21 |
| CTD (carboxy-terminal domain, RNA polymerase II, polypeptide A) phosphatase, subunit 1 (predicted) | Ctdp1_predicted                 | 1.04±0.3   |
| CTD (carboxy-terminal domain, RNA polymerase II, polypeptide A) small phosphatase 1                | Ctdsp1                          | 6.53±1.33  |
| CTD (carboxy-terminal domain, RNA polymerase II, polypeptide A) small phosphatase-like (predicted) | Ctdspl_predicted                | 1.15±0.47  |
| CTD-binding SR-like protein rA9                                                                    | LOC245925                       | 0.59±0.2   |
| C-terminal binding protein 1                                                                       | Ctbp1                           | 4.23±0.7   |
| C-terminal binding protein 2                                                                       | Ctbp2                           | 1.64±0.34  |
| Ctr9, Paf1/RNA polymerase II complex component, homolog (S. cerevisiae)                            | Ctr9                            | 1.38±0.14  |
| CTTNBP2 N-terminal like (predicted)                                                                | Cttnbp2nl_predicted             | 0.25±0.4   |
| C-type lectin domain family 16, member A                                                           | Clec16a                         | 0.72±0.1   |
| cubilin (intrinsic factor-cobalamin receptor)                                                      | Cubn                            | 44.41±2.61 |
| CUE domain containing 2 (predicted)                                                                | Cuedc2_predicted                | 1.01±0.11  |
| CUG triplet repeat, RNA binding protein 1                                                          | Cugbp1                          | 1.42±0.78  |
| CUG triplet repeat, RNA binding protein 2                                                          | Cugbp2                          | 0.66±0.17  |
| cullin 1 (predicted)                                                                               | Cul1_predicted                  | 8.49±0.99  |
| cullin 2 (predicted)                                                                               | Cul2_predicted                  | 0.55±0.05  |
| cullin 3 (predicted)                                                                               | Cul3_predicted                  | 10.59±1.01 |
| Cullin 4B (predicted)                                                                              | Cul4b_predicted                 | 0.91±0.17  |
| Cullin 5                                                                                           | Cul5                            | 0.44±0.12  |
| cullin associated and neddylation disassociated 1                                                  | Cand1                           | 6.36±0.57  |
| cutA divalent cation tolerance homolog (E. coli)                                                   | Cuta                            | 10.65±1.09 |
| cutC copper transporter homolog (E.coli) (predicted)                                               | Cutc_predicted                  | 0.87±0.04  |
| cut-like homeobox 1                                                                                | Cux1                            | 3.15±0.12  |
| CWC15 homolog (S. cerevisiae)                                                                      | Cwc15                           | 3.16±0.32  |
| CXXC finger 1 (PHD domain)                                                                         | Cxxc1                           | 0.94±0.17  |

|                                                                                                          |                      |            |
|----------------------------------------------------------------------------------------------------------|----------------------|------------|
| CXXC finger 5                                                                                            | Cxxc5                | 7.5±1.55   |
| cyclin A2                                                                                                | Ccna2                | 0.49±0.07  |
| cyclin B1                                                                                                | Ccnb1                | 0.74±0.18  |
| cyclin B2                                                                                                | Ccnb2                | 0.7±0.25   |
| cyclin C                                                                                                 | Ccnc                 | 3.67±0.22  |
| cyclin D binding myb-like transcription factor 1 /// hypothetical gene supported by AF352170 (predicted) | Dmtf1 ///            | 2.1±0.23   |
|                                                                                                          | RGD1562889 predicted |            |
| cyclin D1                                                                                                | Ccnd1                | 9.91±2.08  |
| cyclin D3                                                                                                | Ccnd3                | 0.22±0.26  |
| cyclin dependent kinase 2                                                                                | Cdk2                 | 0.96±0.12  |
| cyclin D-type binding-protein 1                                                                          | Ccndbp1              | 2.61±0.18  |
| cyclin E2                                                                                                | Ccne2                | 0.53±0.17  |
| cyclin G associated kinase                                                                               | Gak                  | 2.25±0.23  |
| cyclin G1                                                                                                | Ccng1                | 10.38±0.67 |
| cyclin G2 (predicted)                                                                                    | Ccng2_predicted      | 1.37±0.17  |
| cyclin H                                                                                                 | Ccnh                 | 4.52±0.43  |
| cyclin I (predicted)                                                                                     | Ccni_predicted       | 9.15±2.17  |
| cyclin J (predicted)                                                                                     | Ccnj_predicted       | 0.24±0.05  |
| cyclin K                                                                                                 | Ccnk                 | 2.94±0.24  |
| cyclin L1                                                                                                | Ccnl1                | 2.16±0.34  |
| cyclin L2                                                                                                | Ccnl2                | 5.92±1.3   |
| cyclin M2                                                                                                | Ccnm2                | 1.11±0.04  |
| cyclin M3 (predicted)                                                                                    | Ccnm3_predicted      | 1.98±0.18  |
| cyclin T2 (predicted)                                                                                    | Ccnt2_predicted      | 0.48±0.13  |
| cyclin Y                                                                                                 | Ccny                 | 3.55±0.14  |
| cyclin Y-like 1                                                                                          | Ccnyl1               | 0.88±0.19  |
| cyclin-dependent kinase (CDC2-like) 10                                                                   | Cdk10                | 0.74±0.26  |
| cyclin-dependent kinase 2-interacting protein                                                            | Cinp                 | 0.7±0.18   |
| cyclin-dependent kinase 4                                                                                | Cdk4                 | 4.56±0.37  |
| cyclin-dependent kinase 5                                                                                | Cdk5                 | 1.38±0.3   |
| cyclin-dependent kinase 7 (homolog of Xenopus MO15 cdk-activating kinase)                                | Cdk7                 | 2.5±0.29   |
| cyclin-dependent kinase 9 (CDC2-related kinase)                                                          | Cdk9                 | 3.06±0.51  |
| cyclin-dependent kinase inhibitor 1A                                                                     | Cdkn1a               | 0.63±0.09  |
| cyclin-dependent kinase inhibitor 1B                                                                     | Cdkn1b               | 3.92±0.16  |
| cyclin-dependent kinase inhibitor 2C (p18, inhibits CDK4)                                                | Cdkn2c               | 1.38±0.07  |
| cyclin-dependent kinase inhibitor 3 (predicted)                                                          | Cdkn3_predicted      | 0.93±0.28  |
| cyldromatosis (turban tumor syndrome)                                                                    | Cyld                 | 1.17±0.02  |
| cystathionase (cystathionine gamma-lyase)                                                                | Cth                  | 3.94±1.08  |
| cystathionine beta synthase                                                                              | Cbs                  | 8.33±1.11  |
| cystatin B                                                                                               | Cstb                 | 26.16±0.57 |
| cysteine and glycine-rich protein 2                                                                      | Csrp2                | 7.32±0.67  |
| cysteine and glycine-rich protein 2 binding protein (predicted)                                          | Csrp2bp_predicted    | 0.76±0.36  |
| cysteine and histidine rich 1                                                                            | Cyhr1                | 0.89±0.24  |
| cysteine and histidine-rich domain (CHORD)-containing, zinc-binding protein 1 (predicted)                | Chordc1_predicted    | 4.46±0.73  |
| cysteine conjugate-beta lyase 1                                                                          | Ccb1                 | 21.9±3.54  |
| cysteine-rich hydrophobic domain 2 (predicted)                                                           | Chic2_predicted      | 0.25±0.04  |
| cysteine-rich PDZ-binding protein                                                                        | Cript                | 2.36±0.05  |
| cysteine-rich with EGF-like domains 2                                                                    | Creld2               | 1.5±0.8    |
| cysteinyl-tRNA synthetase (predicted)                                                                    | Cars_predicted       | 1.11±0.58  |
| cytidine 5'-triphosphate synthase 2                                                                      | Ctps2                | 2.24±0.1   |
| cytidine and dCMP deaminase domain containing 1                                                          | Cdadc1               | 2.07±0.29  |
| cytidine monophosphate (UMP-CMP) kinase 1, cytosolic                                                     | Cmpk1                | 35.55±2.82 |
| cytidine monophospho-N-acetylneuraminic acid synthetase                                                  | Cmas                 | 6.43±0.55  |
| Cytidine triphosphate synthase II                                                                        | Ctps2                | 0.83±0.15  |
| cytochrome b /// cytochrome c oxidase subunit 3                                                          | COX3 /// CYTB        | 66.97±4.47 |
| cytochrome b, ascorbate dependent 3                                                                      | Cybas3               | 1.16±0.06  |
| cytochrome b-245, alpha polypeptide                                                                      | Cyba                 | 25.5±0.47  |
| cytochrome b-5                                                                                           | Cyb5                 | 21.43±1.53 |
| cytochrome b5 reductase 3                                                                                | Cyb5r3               | 4.05±0.73  |
| cytochrome b5 reductase 4                                                                                | Cyb5r4               | 5.23±0.36  |
| cytochrome b5 type B                                                                                     | Cyb5b                | 5.27±0.79  |
| cytochrome b-561 domain containing 1 (predicted)                                                         | Cyb561d1_predicted   | 0.35±0.07  |
| cytochrome b-561 domain containing 2                                                                     | Cyb561d2             | 1.58±0.23  |
| cytochrome c oxidase subunit IV isoform 1                                                                | Cox4i1               | 48.66±2.01 |
| cytochrome c oxidase subunit Vb                                                                          | Cox5b                | 36.16±0.92 |
| cytochrome c oxidase subunit VIc-1                                                                       | Cox6c1               | 0.2±0.08   |
| cytochrome c oxidase subunit VIIa polypeptide 2 like (predicted)                                         | Cox7a2l_predicted    | 8.81±0.82  |
| cytochrome c oxidase subunit VIIb                                                                        | Cox7b                | 41.45±4.62 |
| cytochrome c oxidase, subunit Va                                                                         | Cox5a                | 44.46±1.54 |
| cytochrome c oxidase, subunit VIa, polypeptide 1                                                         | Cox6a1               | 45.13±3.9  |
| cytochrome c oxidase, subunit VIb polypeptide 1                                                          | Cox6b1               | 42.39±1.85 |
| cytochrome c oxidase, subunit VIc                                                                        | Cox6c                | 48.21±3.26 |
| cytochrome c oxidase, subunit VIIa 2                                                                     | Cox7a2               | 58.49±2.82 |
| cytochrome c oxidase, subunit VIIla                                                                      | Cox8a                | 54.73±1    |
| cytochrome c oxidase, subunit XVII assembly protein homolog (yeast)                                      | Cox17                | 4.94±0.43  |
| cytochrome c, somatic                                                                                    | Cycc                 | 54.34±1.17 |
| cytochrome c-1 (predicted)                                                                               | Cyc1_predicted       | 33.44±0.32 |
| cytochrome P450 4F6                                                                                      | Cyp4f6               | 2.09±0.23  |
| cytochrome P450 monooxygenase CYP2T1                                                                     | Cyp2t1               | 1.33±0.14  |
| cytochrome P450, family 2, subfamily c, polypeptide 23                                                   | Cyp2c23              | 63.24±2.89 |
| cytochrome P450, family 2, subfamily d, polypeptide 2                                                    | Cyp2d2               | 18.89±3.78 |
| cytochrome P450, family 2, subfamily d, polypeptide 4                                                    | Cyp2d4v1             | 0.67±0.2   |
| cytochrome P450, family 2, subfamily e, polypeptide 1                                                    | Cyp2e1               | 34.02±4.09 |
| cytochrome P450, family 2, subfamily f, polypeptide 4                                                    | Cyp2f4               | 0.35±0.06  |
| cytochrome P450, family 2, subfamily u, polypeptide 1                                                    | Cyp2u1               | 0.38±0.06  |
| cytochrome P450, family 20, subfamily A, polypeptide 1                                                   | Cyp20a1              | 4.77±0.75  |
| cytochrome P450, family 27, subfamily b, polypeptide 1                                                   | Cyp27b1              | 0.38±0.06  |

|                                                                                                                  |                    |            |
|------------------------------------------------------------------------------------------------------------------|--------------------|------------|
| cytochrome P450, family 4, subfamily a, polypeptide 10 /// cytochrome P450, family 4, subfamily a, polypeptide 1 | Cyp4a1 /// Cyp4a10 | 30.31±4.34 |
| cytochrome P450, family 4, subfamily a, polypeptide 2 /// cytochrome P450, family 4, subfamily a, polypeptide 3  | Cyp4a2 /// Cyp4a3  | 33.51±9.3  |
| cytochrome P450, family 4, subfamily a, polypeptide 3                                                            | Cyp4a3             | 15.6±2.96  |
| cytochrome P450, family 4, subfamily a, polypeptide 8                                                            | Cyp4a8             | 12.51±8.24 |
| cytochrome P450, family 4, subfamily f, polypeptide 1                                                            | Cyp4f1             | 23.62±2.97 |
| cytochrome P450, subfamily 51                                                                                    | Cyp51              | 5.76±0.41  |
| cytokine induced apoptosis inhibitor 1                                                                           | Ciapin1            | 8.14±0.84  |
| cytokine induced protein 29 kDa                                                                                  | Cip29              | 3.85±0.68  |
| cytokine inducible SH2-containing protein                                                                        | Cish               | 0.9±0.74   |
| cytoplasmic FMR1 interacting protein 1 (predicted)                                                               | Cyfi1_predicted    | 5.69±0.47  |
| cytoplasmic linker associated protein 1                                                                          | Clasp1             | 0.87±0.08  |
| cytoplasmic polyadenylation element binding protein 2 (predicted)                                                | Cpeb2_predicted    | 0.47±0.55  |
| cytoplasmic polyadenylation element binding protein 4 (predicted)                                                | Cpeb4_predicted    | 9.87±1.41  |
| cytoskeleton associated protein 5                                                                                | Ckap5              | 0.96±0.28  |
| cytoskeleton-associated protein 4 (predicted)                                                                    | Ckap4_predicted    | 1.32±0.4   |
| cytosolic iron-sulfur protein assembly 1 homolog (S. cerevisiae)                                                 | Ciao1              | 2.92±0.27  |
| D site albumin promoter binding protein                                                                          | Dbp                | 2.9±0.09   |
| D-2-hydroxyglutarate dehydrogenase                                                                               | D2hgdh             | 0.38±0.06  |
| D4, zinc and double PHD fingers family 2 (predicted)                                                             | Dpf2_predicted     | 1.84±0.14  |
| D4, zinc and double PHD fingers, family 3 (predicted)                                                            | Dpf3_predicted     | 1.02±0.23  |
| damage-specific DNA binding protein 1                                                                            | Ddb1               | 4.46±0.62  |
| D-amino acid oxidase 1                                                                                           | Dao1               | 36.09±3.23 |
| dapper homolog 2, antagonist of beta-catenin (xenopus) (predicted)                                               | Dact2_predicted    | 1.07±0.58  |
| DAZ associated protein 1                                                                                         | Dazap1             | 1.6±0.52   |
| DAZ associated protein 2                                                                                         | Dazap2             | 24.62±1    |
| DAZ interacting protein 1-like                                                                                   | Dzip11             | 0.56±0.09  |
| DC2 protein                                                                                                      | Dc2                | 4.71±0.54  |
| DCN1, defective in cullin neddylation 1, domain containing 1 (S. cerevisiae) (predicted)                         | Dcun1d1_predicted  | 1.05±0.11  |
| DCN1, defective in cullin neddylation 1, domain containing 4 (S. cerevisiae) (predicted)                         | Dcun1d4_predicted  | 1.6±0.07   |
| DCN1, defective in cullin neddylation 1, domain containing 5 (S. cerevisiae)                                     | Dcun1d5            | 2.32±0.32  |
| DCP1 decapping enzyme homolog A (S. cerevisiae)                                                                  | Dcp1a              | 0.29±0.04  |
| DCP1 decapping enzyme homolog b (S. cerevisiae)                                                                  | Dcp1b              | 0.43±0.09  |
| DDHD domain containing 1                                                                                         | Ddhd1              | 0.25±0.06  |
| D-dopachrome tautomerase                                                                                         | Ddt                | 19.79±2.68 |
| DEAD (Asp-Glu-Ala-Asp) box polypeptide 1                                                                         | Ddx1               | 5.65±0.9   |
| DEAD (Asp-Glu-Ala-Asp) box polypeptide 17                                                                        | Ddx17              | 1.26±0.21  |
| DEAD (Asp-Glu-Ala-Asp) box polypeptide 18                                                                        | Ddx18              | 0.86±0.06  |
| DEAD (Asp-Glu-Ala-Asp) box polypeptide 19                                                                        | Ddx19              | 35.55±1.14 |
| DEAD (Asp-Glu-Ala-Asp) box polypeptide 20                                                                        | Ddx20              | 0.5±0.01   |
| DEAD (Asp-Glu-Ala-Asp) box polypeptide 21                                                                        | Ddx21              | 1.08±0.32  |
| DEAD (Asp-Glu-Ala-Asp) box polypeptide 23 (predicted)                                                            | Ddx23_predicted    | 1.8±0.25   |
| DEAD (Asp-Glu-Ala-Asp) box polypeptide 24                                                                        | Ddx24              | 3.05±0.3   |
| DEAD (Asp-Glu-Ala-Asp) box polypeptide 27                                                                        | Ddx27              | 1.07±0.3   |
| DEAD (Asp-Glu-Ala-Asp) box polypeptide 28 (predicted)                                                            | Ddx28_predicted    | 0.78±0.09  |
| DEAD (Asp-Glu-Ala-Asp) box polypeptide 39                                                                        | Ddx39              | 1.21±0.06  |
| DEAD (Asp-Glu-Ala-Asp) box polypeptide 41 (predicted)                                                            | Ddx41_predicted    | 1.11±0.52  |
| DEAD (Asp-Glu-Ala-Asp) box polypeptide 42 (predicted)                                                            | Ddx42_predicted    | 1.15±0.11  |
| DEAD (Asp-Glu-Ala-Asp) box polypeptide 46                                                                        | Ddx46              | 1.98±0.19  |
| DEAD (Asp-Glu-Ala-Asp) box polypeptide 47                                                                        | Ddx47              | 1.18±0.14  |
| DEAD (Asp-Glu-Ala-Asp) box polypeptide 49 (predicted)                                                            | Ddx49_predicted    | 0.79±0.16  |
| DEAD (Asp-Glu-Ala-Asp) box polypeptide 5                                                                         | Ddx5               | 19.9±2.2   |
| DEAD (Asp-Glu-Ala-Asp) box polypeptide 50                                                                        | Ddx50              | 1.64±0.2   |
| DEAD (Asp-Glu-Ala-Asp) box polypeptide 51 (predicted)                                                            | Ddx51_predicted    | 0.99±0.24  |
| DEAD (Asp-Glu-Ala-Asp) box polypeptide 52                                                                        | Ddx52              | 0.84±0.21  |
| DEAD (Asp-Glu-Ala-Asp) box polypeptide 54                                                                        | Ddx54              | 0.63±0.02  |
| DEAD (Asp-Glu-Ala-Asp) box polypeptide 56                                                                        | Ddx56              | 0.22±0.03  |
| DEAD (Asp-Glu-Ala-Asp) box polypeptide 58 (predicted)                                                            | Ddx58_predicted    | 1.58±0.19  |
| DEAD (Asp-Glu-Ala-Asp) box polypeptide 59                                                                        | Ddx59              | 0.63±0.19  |
| dead end homolog 1 (zebrafish)                                                                                   | Dnd1               | 0.79±0.29  |
| DEAD/H (Asp-Glu-Ala-Asp/His) box polypeptide 11 (CHL1-like helicase homolog, S. cerevisiae) (predicted)          | Ddx11_predicted    | 0.31±0.05  |
| DEAD/H (Asp-Glu-Ala-Asp/His) box polypeptide 3, X-linked                                                         | Ddx3x              | 21.6±1.44  |
| DEAD/H (Asp-Glu-Ala-Asp/His) box polypeptide 31 (predicted)                                                      | Ddx31_predicted    | 0.44±0.09  |
| deafness, autosomal recessive 59                                                                                 | Dfnb59             | 1.2±0.07   |
| DEAH (Asp-Glu-Ala-Asp/His) box polypeptide 57                                                                    | Dhx57              | 0.97±0.07  |
| DEAH (Asp-Glu-Ala-His) box polypeptide 15 (predicted)                                                            | Dhx15_predicted    | 7.48±1.51  |
| DEAH (Asp-Glu-Ala-His) box polypeptide 30                                                                        | Dhx30              | 2.35±0.29  |
| DEAH (Asp-Glu-Ala-His) box polypeptide 35 (predicted)                                                            | Dhx35_predicted    | 0.55±0.07  |
| DEAH (Asp-Glu-Ala-His) box polypeptide 36 (predicted)                                                            | Dhx36_predicted    | 3.18±0.08  |
| DEAH (Asp-Glu-Ala-His) box polypeptide 37 (predicted)                                                            | Dhx37_predicted    | 0.47±0.26  |
| DEAH (Asp-Glu-Ala-His) box polypeptide 38 (predicted)                                                            | Dhx38_predicted    | 0.49±0.12  |
| DEAH (Asp-Glu-Ala-His) box polypeptide 40                                                                        | Dhx40              | 2.55±0.24  |
| DEAH (Asp-Glu-Ala-His) box polypeptide 8                                                                         | Dhx8               | 0.54±0.04  |
| DEAH (Asp-Glu-Ala-His) box polypeptide 9 (predicted)                                                             | Dhx9_predicted     | 5.06±0.69  |
| death associated protein 3                                                                                       | Dap3               | 1.96±0.34  |
| Death effector domain-containing                                                                                 | Dedd               | 3.64±0.47  |
| death inducer-obliterator 1                                                                                      | Dido1              | 0.53±0.07  |
| death-associated protein                                                                                         | Dap                | 9.67±0.81  |
| death-associated protein kinase 3                                                                                | Dapk3              | 1.48±0.25  |
| debranching enzyme homolog 1 (S. cerevisiae)                                                                     | Dbr1               | 0.77±0.1   |
| decapping enzyme, scavenger                                                                                      | Dcps               | 0.8±0.31   |
| dedicator of cytokinesis 11                                                                                      | Dock11             | 0.5±0.12   |
| dedicator of cytokinesis 5 (predicted)                                                                           | Dock5_predicted    | 0.33±0.08  |
| dedicator of cytokinesis 7                                                                                       | Dock7              | 1.01±0.26  |
| dedicator of cytokinesis 8                                                                                       | Dock8              | 1.26±0.3   |
| dedicator of cytokinesis 9                                                                                       | Dock9              | 1.58±0.6   |
| de-etiolated homolog 1 (Arabidopsis)                                                                             | Det1               | 0.26±0.07  |
| defective in sister chromatid cohesion 1 homolog (S. cerevisiae)                                                 | Dscc1              | 0.28±0.16  |



|                                                                                       |                    |            |
|---------------------------------------------------------------------------------------|--------------------|------------|
| defender against cell death 1                                                         | Dad1               | 8.96±0.73  |
| deformed epidermal autoregulatory factor 1 (Drosophila)                               | Deaf1              | 0.76±0.11  |
| degenerative spermatocyte homolog 1 (Drosophila)                                      | Degs1              | 11.7±2.01  |
| dehydrodichyl diphosphate synthase                                                    | Dhdds              | 0.69±0.09  |
| dehydrogenase E1 and transketolase domain containing 1                                | Dhtkd1             | 16.99±1.65 |
| dehydrogenase/reductase (SDR family) member 1                                         | Dhrs1              | 1.62±0.34  |
| dehydrogenase/reductase (SDR family) member 3                                         | Dhrs3              | 1.98±0.74  |
| dehydrogenase/reductase (SDR family) member 4                                         | Dhrs4              | 11.93±0.48 |
| dehydrogenase/reductase (SDR family) member 7B                                        | Dhrs7b             | 3.5±0.4    |
| dehydrogenase/reductase (SDR family) X chromosome                                     | Dhrsx              | 1.12±0.39  |
| deiodinase, iodothyronine, type I                                                     | Dio1               | 2.69±0.56  |
| DEK oncogene (DNA binding)                                                            | Dek                | 9.8±1.35   |
| deltex 3 homolog (Drosophila)                                                         | Dtx3               | 2.72±0.24  |
| demethyl-Q 7                                                                          | Coq7               | 1.98±0.19  |
| DENN/MADD domain containing 1A                                                        | Dennd1a            | 1.37±0.34  |
| DENN/MADD domain containing 2D (predicted)                                            | Dennd2d_predicted  | 1.59±0.09  |
| DENN/MADD domain containing 3                                                         | Dennd3             | 4.47±0.72  |
| DENN/MADD domain containing 4B                                                        | Dennd4b            | 0.25±0.18  |
| deoxyguanosine kinase (predicted)                                                     | Dguok_predicted    | 2.33±0.43  |
| deoxyhypusine hydroxylase/monoxygenase                                                | Dohh               | 2.54±0.04  |
| deoxyhypusine synthase                                                                | Dhps               | 0.97±0.14  |
| deoxynucleotidyltransferase, terminal, interacting protein 1                          | Dnttip1            | 4.26±0.37  |
| deoxynucleotidyltransferase, terminal, interacting protein 2 (predicted)              | Dnttip2_predicted  | 3.15±0.4   |
| deoxyribonuclease 1-like 1                                                            | Dnase111           | 0.76±0.26  |
| deoxythymidylate kinase (predicted)                                                   | Dtymk_predicted    | 9.4±0.29   |
| deoxyuridine triphosphatase                                                           | Dut                | 8±0.61     |
| DEP domain containing 1a (predicted)                                                  | Depdc1a_predicted  | 0.23±0.04  |
| DEP domain containing 5 (predicted)                                                   | Depdc5_predicted   | 0.24±0.07  |
| DEP domain containing 7                                                               | Depdc7             | 6.54±0.55  |
| dephospho-CoA kinase domain containing                                                | Dcakd              | 0.68±0.22  |
| Der1-like domain family, member 1                                                     | Derl1              | 6.44±0.24  |
| desmuslin                                                                             | Dmn                | 0.32±0.02  |
| destrin                                                                               | Dstn               | 11±2.21    |
| DET1 and DDB1 associated 1                                                            | Dda1               | 0.98±0.29  |
| development and differentiation enhancing (predicted)                                 | Ddef1_predicted    | 0.48±0.13  |
| development and differentiation enhancing factor 2 (predicted)                        | Ddef2_predicted    | 0.28±0.18  |
| developmentally regulated GTP binding protein 1                                       | Drg1               | 2.21±0.22  |
| developmentally regulated GTP binding protein 2                                       | Drg2               | 1.52±0.33  |
| developmentally regulated protein TPO1                                                | Tpo1               | 0.99±0.07  |
| dexamethasone-induced transcript                                                      | Dexi               | 0.81±0.05  |
| diablo homolog (Drosophila)                                                           | Diablo             | 3.95±0.44  |
| diacylglycerol kinase, alpha                                                          | Dgka               | 1.31±0.28  |
| diacylglycerol kinase, gamma                                                          | Dgkg               | 9.42±0.14  |
| diacylglycerol lipase, beta                                                           | Daqlb              | 0.49±0.14  |
| diacylglycerol O-acyltransferase 1                                                    | Dgat1              | 3.5±0.54   |
| diacylglycerol O-acyltransferase 2                                                    | Dgat2              | 1.59±0.43  |
| Diaphanous homolog 1 (Drosophila) (predicted)                                         | Diap1_predicted    | 1.95±0.58  |
| diazepam binding inhibitor                                                            | Dbi                | 46.04±0.96 |
| dicarbonyl L-xylulose reductase                                                       | Dcxr               | 34.88±3.61 |
| Dicer1, Dcr-1 homolog (Drosophila)                                                    | Dicer1             | 0.44±0.06  |
| differentially expressed in FDCP 8                                                    | Def8               | 5.47±0.59  |
| DiGeorge syndrome critical region gene 2                                              | Dgcr2              | 1.57±0.11  |
| DiGeorge syndrome critical region gene 6 (predicted)                                  | Dgcr6_predicted    | 0.99±0.29  |
| DiGeorge syndrome critical region gene 8 (predicted)                                  | Dgcr8_predicted    | 0.66±0.18  |
| dihydrofolate reductase                                                               | Dhfr               | 7.64±2.51  |
| dihydrolipoamide branched chain transacylase E2                                       | Dbt                | 4.71±0.24  |
| dihydrolipoamide dehydrogenase                                                        | Dld                | 15.71±2.38 |
| dihydrolipoamide S-acetyltransferase (E2 component of pyruvate dehydrogenase complex) | Dlat               | 5.67±0.43  |
| dihydrolipoamide S-succinyltransferase (E2 component of 2-oxo-glutarate complex)      | Dlst               | 17.23±0.83 |
| dihydroorotate dehydrogenase                                                          | Dhodh              | 0.93±0.11  |
| dihydropyrimidinase                                                                   | Dpys               | 6.54±1.09  |
| dihydropyrimidine dehydrogenase                                                       | Dpyd               | 1.41±0.28  |
| dihydrouridine synthase 2-like, SMM1 homolog (S. cerevisiae)                          | Dus2l              | 0.95±0.05  |
| dihydrouridine synthase 3-like (S. cerevisiae)                                        | Dus3l              | 0.64±0.02  |
| dihydroxyacetone kinase 2 homolog (yeast)                                             | Dak                | 9.99±2.2   |
| DIM1 dimethyladenosine transferase 1-like (S. cerevisiae)                             | Dimt1              | 0.55±0.06  |
| dimethylarginine dimethylaminohydrolase 1                                             | Ddah1              | 35.14±1.78 |
| dimethylarginine dimethylaminohydrolase 2                                             | Ddah2              | 0.36±0.11  |
| dimethylglycine dehydrogenase precursor                                               | Dmgdh              | 7.9±1      |
| dipeptidase 1 (renal)                                                                 | Dpep1              | 0.47±0.05  |
| dipeptidyl peptidase 9                                                                | Dpp9               | 0.55±0.22  |
| dipeptidylpeptidase 3                                                                 | Dpp3 /// LOC678760 | 3.78±0.55  |
| dipeptidylpeptidase 4                                                                 | Dpp4               | 32.8±2.18  |
| dipeptidylpeptidase 7                                                                 | Dpp7               | 54.62±2.6  |
| dipeptidylpeptidase 8 (predicted)                                                     | Dpp8_predicted     | 2.15±0.29  |
| DIS3 mitotic control homolog (S. cerevisiae)-like                                     | Dis3l              | 1.78±0.05  |
| DIS3 mitotic control homolog (S. cerevisiae)-like 2                                   | Dis3l2             | 0.86±0.39  |
| disabled homolog 2 (Drosophila) interacting protein                                   | Dab2ip             | 1.14±0.12  |
| disabled homolog 2, mitogen-responsive phosphoprotein (Drosophila)                    | Dab2               | 55.45±1.71 |
| Discoidin domain receptor family, member 2                                            | Ddr2               | 0.59±0.12  |
| discs, large (Drosophila) homolog-associated protein 1                                | Dlgap1             | 0.89±0.19  |
| Discs, large homolog 1 (Drosophila)                                                   | Dlgh1              | 2.2±0.13   |
| discs, large homolog 5 (Drosophila) (predicted)                                       | Dlg5_predicted     | 3.05±0.06  |
| dishevelled associated activator of morphogenesis 1 (predicted)                       | Daam1_predicted    | 1.55±0.14  |
| dishevelled, dsh homolog 1 (Drosophila)                                               | Dvl1               | 2.26±0.47  |
| disrupted in renal carcinoma 2                                                        | Dirc2              | 7.24±1.17  |
| distribrevin binding protein 1                                                        | Dtnbp1             | 7.69±1.01  |

|                                                                                                               |                     |            |
|---------------------------------------------------------------------------------------------------------------|---------------------|------------|
| DMRT-like family C1c                                                                                          | Dmrtc1c             | 0.97±1.3   |
| Dmx-like 1 (predicted)                                                                                        | Dmx1_predicted      | 0.41±0.11  |
| DNA cross-link repair 1A, PSO2 homolog (S. cerevisiae) (predicted)                                            | Dclre1a_predicted   | 1±0.18     |
| DNA fragmentation factor, alpha subunit                                                                       | Dffa                | 1.05±0.37  |
| DNA fragmentation factor, beta subunit                                                                        | Dffb                | 0.21±0.04  |
| DNA methyltransferase (cytosine-5) 1                                                                          | Dnmt1               | 0.52±0.16  |
| DNA methyltransferase 1-associated protein 1                                                                  | Dmap1               | 0.69±0.05  |
| DNA primase, p49 subunit                                                                                      | Prim1               | 1.19±0.3   |
| DNA primase, p58 subunit                                                                                      | Prim2               | 0.34±0.22  |
| DNA topoisomerase 1, mitochondrial                                                                            | Top1mt              | 0.2±0.11   |
| DNA-damage inducible transcript 3                                                                             | Ddit3               | 0.9±0.22   |
| DNA-damage-inducible transcript 4-like                                                                        | Ddit4l              | 1.78±0.76  |
| DnaJ (Hsp40) homolog, subfamily A, member 1                                                                   | Dnaja1              | 19.03±3.82 |
| DnaJ (Hsp40) homolog, subfamily A, member 2                                                                   | Dnaja2              | 10.25±1.46 |
| DnaJ (Hsp40) homolog, subfamily A, member 3                                                                   | Dnaja3              | 3.46±0.58  |
| DnaJ (Hsp40) homolog, subfamily A, member 4                                                                   | Dnaja4              | 0.64±0.02  |
| DnaJ (Hsp40) homolog, subfamily B, member 1 (predicted)                                                       | Dnajb1_predicted    | 3.12±0.34  |
| DnaJ (Hsp40) homolog, subfamily B, member 11                                                                  | Dnajb11             | 5.2±0.73   |
| DnaJ (Hsp40) homolog, subfamily B, member 12                                                                  | Dnajb12             | 1.32±0.17  |
| DnaJ (Hsp40) homolog, subfamily B, member 5 (predicted)                                                       | Dnajb5_predicted    | 0.98±0.2   |
| DnaJ (Hsp40) homolog, subfamily B, member 6                                                                   | Dnajb6              | 0.33±0.04  |
| DnaJ (Hsp40) homolog, subfamily B, member 9                                                                   | Dnajb9              | 5.34±0.64  |
| DnaJ (Hsp40) homolog, subfamily C, member 10                                                                  | Dnajc10             | 2.69±0.24  |
| DnaJ (Hsp40) homolog, subfamily C, member 11 (predicted)                                                      | Dnajc11_predicted   | 0.77±0.19  |
| DnaJ (Hsp40) homolog, subfamily C, member 13 (predicted)                                                      | Dnajc13_predicted   | 15.97±1.43 |
| DnaJ (Hsp40) homolog, subfamily C, member 14                                                                  | Dnajc14             | 0.72±0.05  |
| DnaJ (Hsp40) homolog, subfamily C, member 15 (predicted)                                                      | Dnajc15_predicted   | 7.59±0.63  |
| DnaJ (Hsp40) homolog, subfamily C, member 18                                                                  | Dnajc18             | 0.34±0.06  |
| DnaJ (Hsp40) homolog, subfamily C, member 2                                                                   | Dnajc2              | 1.22±0.15  |
| DnaJ (Hsp40) homolog, subfamily C, member 21                                                                  | Dnajc21             | 0.81±0.09  |
| DnaJ (Hsp40) homolog, subfamily C, member 3                                                                   | Dnajc3              | 3±0.82     |
| DnaJ (Hsp40) homolog, subfamily C, member 4                                                                   | Dnajc4              | 1.19±0.11  |
| DnaJ (Hsp40) homolog, subfamily C, member 5                                                                   | Dnajc5              | 0.37±0.03  |
| DnaJ (Hsp40) homolog, subfamily C, member 6 (predicted)                                                       | Dnajc6_predicted    | 6.41±0.51  |
| DnaJ (Hsp40) homolog, subfamily C, member 7                                                                   | Dnajc7              | 1.5±0.75   |
| DnaJ (Hsp40) homolog, subfamily C, member 8                                                                   | Dnajc8              | 3.32±0.28  |
| DnaJ (Hsp40) homolog, subfamily C, member 9 (predicted)                                                       | Dnajc9_predicted    | 0.76±0.21  |
| DnaJ homolog subfamily C member 12                                                                            | Dnajc12             | 4.51±0.16  |
| docking protein 4 (predicted)                                                                                 | Dok4_predicted      | 0.39±0.14  |
| dodecenoyl-coenzyme A delta isomerase                                                                         | Dci                 | 13.35±1.47 |
| dolichol kinase                                                                                               | Dolk                | 6.18±0.81  |
| dolichol-phosphate (beta-D) mannosyltransferase 1 (predicted)                                                 | Dpm1_predicted      | 8.45±1.1   |
| dolichol-phosphate (beta-D) mannosyltransferase 2                                                             | Dpm2                | 1.52±0.09  |
| dolichyl-di-phosphooligosaccharide-protein glycotransferase (predicted)                                       | Ddost_predicted     | 8.39±0.44  |
| dolichyl-phosphate (UDP-N-acetylglucosamine) N-acetylglucosaminophosphotransferase 1 (GlcNAc-1-P transferase) | Dpagt1              | 3.02±0.39  |
| dopa decarboxylase                                                                                            | Ddc                 | 33.69±0.46 |
| DOT1-like, histone H3 methyltransferase (S. cerevisiae) (predicted)                                           | Dot11_predicted     | 0.79±0.08  |
| doublecortin-like kinase 2                                                                                    | Dclk2               | 0.22±0.19  |
| doublecortin-like kinase 3 (predicted)                                                                        | Dclk3_predicted     | 0.57±0.08  |
| Down syndrome critical region gene 3 (predicted)                                                              | Dscr3_predicted     | 2.39±0.09  |
| Down syndrome critical region homolog 2 (human) (predicted)                                                   | Dscr2_predicted     | 2.81±0.32  |
| down-regulator of transcription 1                                                                             | Dr1                 | 1.23±0.13  |
| DPH1 homolog (S. cerevisiae) /// candidate tumor suppressor in ovarian cancer 2                               | Dph1 /// Ovca2      | 2.25±0.3   |
| DPH2 homolog (S. cerevisiae)                                                                                  | Dph2                | 0.74±0.06  |
| DPH3, KTI11 homolog (S. cerevisiae)                                                                           | Dph3                | 5.14±0.96  |
| DPH4 homolog (JJJ3, S. cerevisiae)                                                                            | Dph4                | 0.51±0.19  |
| DPH5 homolog (S. cerevisiae)                                                                                  | Dph5                | 0.57±0.16  |
| Dpy-19-like 1 (C. elegans) (predicted)                                                                        | Dpy19l1_predicted   | 3.01±0.26  |
| dpy-30 homolog (C. elegans)                                                                                   | Dpy30               | 4.5±0.49   |
| Dr1 associated protein 1 (negative cofactor 2 alpha) (predicted)                                              | Drap1_predicted     | 2.03±0.4   |
| drebrin-like                                                                                                  | Dbnl                | 3.23±0.34  |
| D-serine modulator-1                                                                                          | Dsm-1               | 1.94±0.37  |
| DTW domain containing 1                                                                                       | Dtwd1               | 0.42±0.07  |
| D-tyrosyl-tRNA deacylase 1 homolog (S. cerevisiae)                                                            | Dtd1                | 2.62±0.38  |
| dual specificity phosphatase 11 (RNA/RNP complex 1-interacting)                                               | Dusp11              | 1.93±0.32  |
| dual specificity phosphatase 16 (predicted)                                                                   | Dusp16_predicted    | 0.44±0.06  |
| dual specificity phosphatase 19 (predicted)                                                                   | Dusp19_predicted    | 1.4±0.17   |
| dual specificity phosphatase 22 (predicted)                                                                   | Dusp22_predicted    | 2.54±0.37  |
| dual specificity phosphatase 3 (vaccinia virus phosphatase VH1-related)                                       | Dusp3               | 10.37±0.08 |
| dual-specificity tyrosine-(Y)-phosphorylation regulated kinase 1A                                             | Dyrk1a              | 1.03±0.02  |
| dual-specificity tyrosine-(Y)-phosphorylation regulated kinase 2 (predicted)                                  | Dyrk2_predicted     | 2.4±0.38   |
| Dullard homolog (Xenopus laevis)                                                                              | Dullard             | 0.66±0.03  |
| dymeclin (predicted)                                                                                          | Dym_predicted       | 2.39±0.2   |
| dynactin 1                                                                                                    | Dctn1               | 2.65±0.64  |
| dynactin 2                                                                                                    | Dctn2               | 4.75±0.55  |
| dynactin 3 (predicted)                                                                                        | Dctn3_predicted     | 6.18±0.27  |
| dynactin 4                                                                                                    | Dctn4               | 0.67±0.02  |
| dynactin 4 /// similar to dynactin subunit p62                                                                | Dctn4 /// LOC498752 | 0.37±0.07  |
| dynactin 5                                                                                                    | Dctn5               | 4.11±0.17  |
| dynactin 6 (predicted)                                                                                        | Dctn6_predicted     | 3.66±0.08  |
| dynamamin 1-like                                                                                              | Dnm1l               | 1.21±0.34  |
| dynamamin 3                                                                                                   | Dnm3                | 0.77±0.12  |
| dynamamin binding protein                                                                                     | Dnmbp               | 0.8±0.24   |
| dynein cytoplasmic 1 heavy chain 1                                                                            | Dync1h1             | 8.02±0.73  |
| dynein cytoplasmic 1 intermediate chain 2                                                                     | Dync1i2             | 4.86±0.59  |
| Dynein cytoplasmic 1 light intermediate chain 1                                                               | Dync1l1             | 4.09±0.88  |
| dynein cytoplasmic 2 heavy chain 1                                                                            | Dync2h1             | 1.01±0.14  |

|                                                                                            |                  |            |
|--------------------------------------------------------------------------------------------|------------------|------------|
| dynein cytoplasmic 2 light intermediate chain 1                                            | Dync2li1         | 1.93±0.23  |
| dynein light chain LC8-type 1                                                              | Dynl1            | 2.2±0.85   |
| dynein light chain LC8-type 2                                                              | Dynl2            | 9.62±0.88  |
| dynein light chain roadblock-type 1                                                        | Dynlr1           | 10.52±1.63 |
| dynein light chain Tctex-type 1                                                            | Dynlt1           | 3.01±0.26  |
| dynein light chain Tctex-type 3                                                            | Dynlt3           | 2.21±0.46  |
| dynein, axonemal, light chain 4                                                            | Dnal4            | 2.83±0.14  |
| dynein, cytoplasmic 1 light intermediate chain 2                                           | Dync1li2         | 3.13±0.74  |
| dyskeratosis congenita 1, dyskerin                                                         | Dkc1             | 1.09±0.4   |
| dystonia 1                                                                                 | Dyt1             | 1.86±0.15  |
| dystonin (predicted)                                                                       | Dst_predicted    | 2.86±0.85  |
| dystrobrevin, beta                                                                         | Dtnb             | 0.57±0.31  |
| dystroglycan 1                                                                             | Daq1             | 2.91±0.4   |
| E1A binding protein p300                                                                   | Ep300            | 2.35±0.59  |
| E1A binding protein p400                                                                   | Ep400            | 1.01±0.15  |
| E26 avian leukemia oncogene 2, 3' domain                                                   | Ets2             | 1.15±0.33  |
| E2F transcription factor 5                                                                 | E2f5             | 3.22±0.28  |
| E2F-associated phosphoprotein                                                              | Eapp             | 4.38±0.41  |
| E74-like factor 1                                                                          | Elf1             | 0.2±0.06   |
| E74-like factor 2                                                                          | Elf2             | 0.41±0.1   |
| early endosome antigen 1 (predicted)                                                       | Eea1_predicted   | 1.59±0.12  |
| EBNA1 binding protein 2                                                                    | Ebna1bp2         | 1.98±0.06  |
| echinoderm microtubule associated protein like 4 (predicted)                               | Eml4_predicted   | 0.64±0.23  |
| ECSIT homolog (Drosophila)                                                                 | Ecsit            | 2.22±0.07  |
| ect2 oncogene (predicted)                                                                  | Ect2_predicted   | 0.73±0.23  |
| ecto-NOX disulfide-thiol exchanger 2                                                       | Enox2            | 0.69±0.09  |
| ectonucleoside triphosphate diphosphohydrolase 2                                           | Entpd2           | 0.29±0.17  |
| ectonucleoside triphosphate diphosphohydrolase 4 (predicted)                               | Entpd4_predicted | 3.71±0.42  |
| ectonucleoside triphosphate diphosphohydrolase 5                                           | Entpd5           | 9±2.09     |
| ectonucleotide pyrophosphatase/phosphodiesterase 1                                         | Enpp1            | 2.62±0.24  |
| ectonucleotide pyrophosphatase/phosphodiesterase 2                                         | Enpp2            | 3.84±0.57  |
| ectonucleotide pyrophosphatase/phosphodiesterase 3                                         | Enpp3            | 1.87±0.42  |
| Ectonucleotide pyrophosphatase/phosphodiesterase 4 (predicted)                             | Enpp4_predicted  | 0.52±0.04  |
| ectonucleotide pyrophosphatase/phosphodiesterase 6 (predicted)                             | Enpp6_predicted  | 9.75±1.3   |
| EF hand domain family A1                                                                   | Efha1            | 2.8±0.35   |
| EF hand domain family, member A2                                                           | Efha2            | 4.02±0.29  |
| EF-hand calcium binding domain 2 (predicted)                                               | Efcab2_predicted | 0.39±0.17  |
| EF-hand calcium binding domain 4A                                                          | Efcab4a          | 1.15±0.51  |
| EF-hand calcium binding domain 7                                                           | Efcab7           | 0.26±0.2   |
| EF-hand domain (C-terminal) containing 2 (predicted)                                       | Efhc2_predicted  | 0.82±0.03  |
| EFR3 homolog A (S. cerevisiae)                                                             | Efr3a            | 3.79±0.37  |
| EGF-containing fibulin-like extracellular matrix protein 2                                 | Efemp2           | 0.5±0.06   |
| EGL nine homolog 1 (C. elegans)                                                            | Egln1            | 1.26±0.23  |
| EGL nine homolog 2 (C. elegans)                                                            | Egln2            | 2.4±0.51   |
| EH domain binding protein 1 (predicted)                                                    | Ehbp1_predicted  | 2.38±0.45  |
| EH-domain containing 1                                                                     | Ehd1             | 11.94±1.63 |
| elaC homolog 2 (E. coli)                                                                   | Elac2            | 0.95±0.18  |
| elastase 1, pancreatic                                                                     | Ela1             | 3.1±0.98   |
| ELAV (embryonic lethal, abnormal vision, Drosophila)-like 1 (Hu antigen R) (predicted)     | Elav1_predicted  | 5.71±0.62  |
| electron transferring flavoprotein, alpha polypeptide                                      | Etfa             | 23.49±0.78 |
| electron transferring flavoprotein, beta polypeptide                                       | Etfb             | 19.11±2.95 |
| electron-transferring-flavoprotein dehydrogenase                                           | Etfdh            | 7.4±0.64   |
| ELK4, member of ETS oncogene family (predicted)                                            | Elk4_predicted   | 1.19±0.26  |
| ELL associated factor 1 (predicted)                                                        | Eaf1_predicted   | 1.43±0.15  |
| ELMO domain containing 2                                                                   | Elmod2           | 0.98±0.15  |
| elongation factor 1 homolog (S. cerevisiae)                                                | Elof1            | 4.32±0.49  |
| elongation factor RNA polymerase II 2                                                      | Ell2             | 0.98±0.08  |
| Elongation factor RNA polymerase II-like 3                                                 | Ell3             | 0.74±0.14  |
| elongation factor Tu GTP binding domain containing 1 (predicted)                           | Eftud1_predicted | 0.58±0.07  |
| elongation factor Tu GTP binding domain containing 2                                       | Eftud2           | 2.38±0.49  |
| elongation of very long chain fatty acids (FEN1/Elo2, SUR4/Elo3, yeast)-like 2 (predicted) | Elov12_predicted | 6.46±0.61  |
| elongation protein 2 homolog (S. cerevisiae)                                               | Elp2             | 2.92±0.47  |
| ELOVL family member 5, elongation of long chain fatty acids (yeast)                        | Elov5            | 0.67±0.18  |
| ELOVL family member 6, elongation of long chain fatty acids (yeast)                        | Elov6            | 0.47±0.32  |
| embryonic ectoderm development (predicted)                                                 | Eed_predicted    | 1.68±0.14  |
| EMG1 nucleolar protein homolog (S. cerevisiae) (predicted)                                 | Emq1_predicted   | 0.95±0.03  |
| emopamil binding protein-like (predicted)                                                  | Ebpl_predicted   | 0.3±0.12   |
| empty spiracles homeobox 2                                                                 | Emx2             | 1.33±0.34  |
| empty spiracles homolog 1 (Drosophila)                                                     | Emx1             | 0.33±0.05  |
| enabled homolog (Drosophila)                                                               | Enah             | 0.68±0.07  |
| Ena-vasodilator stimulated phosphoprotein                                                  | Evl              | 4.76±0.95  |
| endonuclease G                                                                             | Endog            | 0.5±0.11   |
| endonuclease/exonuclease/phosphatase family domain containing 1                            | Eepd1            | 0.86±0.39  |
| endoplasmic reticulum (ER) to nucleus signalling 1                                         | Ern1             | 1.45±0.31  |
| endoplasmic reticulum chaperone SIL1 homolog (S. cerevisiae)                               | Sil1             | 0.55±0.45  |
| endoplasmic reticulum metalloproteinase 1                                                  | Ermp1            | 0.26±0.25  |
| endoplasmic reticulum protein 29                                                           | Erp29            | 9.34±1.64  |
| endoplasmic reticulum-golgi intermediate compartment (ERGIC) 1                             | Ergic1           | 0.56±0.32  |
| endosulfine alpha                                                                          | Ensa             | 1.35±0.26  |
| endothelial differentiation, lysophosphatidic acid G-protein-coupled receptor 4            | Edg4             | 0.33±0.1   |
| endothelial differentiation, lysophosphatidic acid G-protein-coupled receptor 7            | Edg7             | 0.28±0.01  |
| endothelial differentiation-related factor 1 (predicted)                                   | Edf1_predicted   | 9.27±2.67  |
| engulfment and cell motility 2, ced-12 homolog (C. elegans)                                | Elmo2            | 1.14±0.21  |
| engulfment and cell motility 3, ced-12 homolog (C. elegans)                                | Elmo3            | 2.36±0.32  |
| enhancer of polycomb homolog 1 (Drosophila) (predicted)                                    | Epc1_predicted   | 1.25±0.03  |
| enhancer of polycomb homolog 2 (Drosophila) (predicted)                                    | Epc2_predicted   | 0.5±0.15   |
| enhancer of rudimentary homolog (Drosophila)                                               | Erh              | 4.57±0.38  |

|                                                                                                                                  |                                    |            |
|----------------------------------------------------------------------------------------------------------------------------------|------------------------------------|------------|
| enhancer of zeste homolog 1 (Drosophila) (predicted)                                                                             | Ezh1_predicted                     | 2.14±0.35  |
| enhancer of zeste homolog 2 (Drosophila)                                                                                         | Ezh2                               | 0.22±0.13  |
| enolase 1, alpha non-neuron                                                                                                      | Eno1                               | 54.57±2.64 |
| enolase 3, beta, muscle                                                                                                          | Eno3                               | 0.26±0.01  |
| enolase-phosphatase 1                                                                                                            | Enoph1                             | 0.51±0.39  |
| enoyl coenzyme A hydratase 1, peroxisomal                                                                                        | Ech1                               | 10.18±1.52 |
| enoyl Coenzyme A hydratase domain containing 1                                                                                   | Echdc1                             | 6.54±0.23  |
| enoyl Coenzyme A hydratase domain containing 2 (predicted)                                                                       | Echdc2_predicted                   | 5.88±0.27  |
| enoyl Coenzyme A hydratase, short chain, 1, mitochondrial                                                                        | Echs1                              | 10.9±0.66  |
| enoyl-Coenzyme A, hydratase/3-hydroxyacyl Coenzyme A dehydrogenase                                                               | Ehhadh                             | 7.11±0.73  |
| enthoproin                                                                                                                       | Enth                               | 4.12±0.15  |
| EP300 interacting inhibitor of differentiation 1                                                                                 | Eid1                               | 6.25±0.29  |
| EP300 interacting inhibitor of differentiation 2                                                                                 | Eid2                               | 1.4±0.1    |
| Eph receptor A2 (predicted)                                                                                                      | Epha2_predicted                    | 0.7±0.03   |
| Eph receptor A4                                                                                                                  | Epha4                              | 3.34±0.56  |
| ephrin B1                                                                                                                        | Efnb1                              | 0.56±0.23  |
| epidermal growth factor receptor /// peptidase D                                                                                 | Egfr /// Pepd                      | 33.41±1.29 |
| epidermal growth factor receptor pathway substrate 15                                                                            | Eps15                              | 1.61±0.21  |
| epidermal growth factor receptor pathway substrate 15-like 1                                                                     | Eps15l1                            | 0.62±0.14  |
| epidermal growth factor receptor pathway substrate 8 (predicted)                                                                 | Eps8_predicted                     | 6.86±0.87  |
| EPM2A (laforin) interacting protein 1 (predicted)                                                                                | Epm2aip1_predicted                 | 5.63±0.15  |
| epoxide hydrolase 1, microsomal                                                                                                  | Ephx1                              | 14.97±2.01 |
| epoxide hydrolase 2, cytoplasmic                                                                                                 | Ephx2                              | 16.35±0.19 |
| EPS8-like 2 (predicted)                                                                                                          | Eps8l2_predicted                   | 1.65±0.3   |
| Epsin 1                                                                                                                          | Epn1                               | 0.73±0.01  |
| ER degradation enhancer, mannosidase alpha-like 1                                                                                | Edem1                              | 7.89±1.35  |
| ER degradation enhancer, mannosidase alpha-like 2                                                                                | Edem2                              | 0.63±0.05  |
| ER lipid raft associated 1                                                                                                       | Erlin1                             | 4.34±0.91  |
| ER lipid raft associated 2                                                                                                       | Erlin2                             | 6.89±0.39  |
| ERBB receptor feedback inhibitor 1                                                                                               | Errf1                              | 19.83±4.03 |
| ERGIC and golgi 3 (predicted)                                                                                                    | Ergic3_predicted                   | 3.94±0.46  |
| ERO1-like (S. cerevisiae)                                                                                                        | Ero1l                              | 0.44±0.13  |
| erythrocyte membrane protein band 4.1                                                                                            | Epb4.1                             | 3.49±0.53  |
| erythrocyte protein band 4.1-like 1                                                                                              | Epb4.1l1                           | 1.63±0.46  |
| erythrocyte protein band 4.1-like 3                                                                                              | Epb4.1l3                           | 29.06±1.51 |
| erythrocyte protein band 4.1-like 4a (predicted)                                                                                 | Epb4.1l4a_predicted                | 1.9±0.26   |
| erythrocyte protein band 4.1-like 5                                                                                              | Epb4.1l5                           | 1.89±0.16  |
| erythrocyte protein band 4.9 (predicted)                                                                                         | Epb4.9_predicted                   | 5.04±0.42  |
| ESF1, nucleolar pre-rRNA processing protein, homolog (S. cerevisiae)                                                             | Esf1                               | 1.01±0.28  |
| espin                                                                                                                            | Espn                               | 3.16±1.61  |
| establishment of cohesion 1 homolog 1 (S. cerevisiae)                                                                            | Esco1                              | 2.45±0.13  |
| esterase 22                                                                                                                      | Es22                               | 4.3±1.11   |
| esterase 22 /// carboxylesterase-like /// carboxylesterase ES-4                                                                  | Es22 /// LOC501232 /// rCG 44273   | 42.98±4.4  |
| esterase D/formylglutathione hydrolase                                                                                           | Esd                                | 16.38±1.87 |
| estrogen receptor-binding fragment-associated gene 9                                                                             | Ebag9                              | 3.76±0.28  |
| estrogen related receptor, alpha                                                                                                 | Esrra                              | 2.41±0.1   |
| Ethanolamine kinase 1 (predicted)                                                                                                | Etnk1_predicted                    | 5.72±0.62  |
| ethylmalonic encephalopathy 1 (predicted)                                                                                        | Ethe1_predicted                    | 19.95±1.14 |
| etoposide induced 2.4 mRNA                                                                                                       | Ei24                               | 7.15±0.3   |
| ets variant gene 1 (predicted)                                                                                                   | Etv1_predicted                     | 13.21±1.79 |
| Ets2 repressor factor (predicted)                                                                                                | Erf_predicted                      | 1.18±0.21  |
| euchromatic histone methyltransferase 1 (predicted)                                                                              | Ehmt1_predicted                    | 1.47±0.21  |
| eukaryotic elongation factor, selenocysteine-tRNA-specific                                                                       | Eefsec                             | 4.05±0.97  |
| eukaryotic translation elongation factor 1 alpha 1                                                                               | Eef1a1                             | 41.77±3.66 |
| eukaryotic translation elongation factor 1 alpha 1 /// similar to eukaryotic translation elongation factor 1 alpha 1 (predicted) | Eef1a1 /// RGD1566344_predicted    | 44.7±3.27  |
| eukaryotic translation elongation factor 1 beta 2 (predicted)                                                                    | Eef1b2_predicted                   | 17.27±2.79 |
| eukaryotic translation elongation factor 1 delta (guanine nucleotide exchange protein)                                           | Eef1d                              | 7.44±0.53  |
| eukaryotic translation elongation factor 1 epsilon 1 (predicted)                                                                 | Eef1e1_predicted                   | 3.55±0.27  |
| eukaryotic translation elongation factor 1 gamma                                                                                 | Eef1g                              | 11.57±0.5  |
| eukaryotic translation elongation factor 2                                                                                       | Eef2                               | 16.48±1.01 |
| eukaryotic translation initiation factor 1                                                                                       | Eif1                               | 23.95±2.29 |
| eukaryotic translation initiation factor 1A                                                                                      | Eif1a                              | 0.82±0.03  |
| eukaryotic translation initiation factor 1A domain containing                                                                    | Eif1ad                             | 1.5±0.03   |
| eukaryotic translation initiation factor 1A, Y-linked                                                                            | Eif1ay                             | 5.37±0.46  |
| eukaryotic translation initiation factor 1B (predicted)                                                                          | Eif1b_predicted                    | 2.87±0.12  |
| eukaryotic translation initiation factor 2 alpha kinase 1                                                                        | Eif2ak1                            | 2.61±0.45  |
| eukaryotic translation initiation factor 2 alpha kinase 3                                                                        | Eif2ak3                            | 1.16±0.2   |
| eukaryotic translation initiation factor 2, subunit 1 alpha                                                                      | Eif2s1                             | 4.55±0.58  |
| eukaryotic translation initiation factor 2, subunit 1 alpha /// hypothetical gene supported by NM_019356                         | Eif2s1 /// LOC364604 /// LOC364984 | 0.33±0.06  |
| eukaryotic translation initiation factor 2, subunit 2 (beta)                                                                     | Eif2s2                             | 8.58±1.05  |
| eukaryotic translation initiation factor 2, subunit 3, structural gene X-linked                                                  | Eif2s3x                            | 4.74±0.73  |
| eukaryotic translation initiation factor 2A                                                                                      | Eif2a                              | 4.05±0.63  |
| eukaryotic translation initiation factor 2-alpha kinase 2                                                                        | Eif2ak2                            | 0.71±0.18  |
| eukaryotic translation initiation factor 2B, subunit 1 alpha                                                                     | Eif2b1                             | 2.76±0.53  |
| eukaryotic translation initiation factor 2B, subunit 2 beta                                                                      | Eif2b2                             | 2.95±0.46  |
| eukaryotic translation initiation factor 2B, subunit 3                                                                           | Eif2b3                             | 0.45±0.21  |
| eukaryotic translation initiation factor 2B, subunit 4 delta                                                                     | Eif2b4                             | 1.86±0.25  |
| eukaryotic translation initiation factor 2B, subunit 5 epsilon                                                                   | Eif2b5                             | 1.3±0.21   |
| eukaryotic translation initiation factor 2C, 1 (predicted)                                                                       | Eif2c1_predicted                   | 1.15±0.24  |
| eukaryotic translation initiation factor 2C, 2                                                                                   | Eif2c2                             | 0.45±0.18  |
| eukaryotic translation initiation factor 3, subunit 1 alpha (predicted)                                                          | Eif3s1_predicted                   | 5.1±0.21   |
| eukaryotic translation initiation factor 3, subunit 10 (theta)                                                                   | Eif3s10                            | 8.97±0.54  |
| eukaryotic translation initiation factor 3, subunit 6 interacting protein                                                        | Eif3s6ip                           | 10.83±0.21 |
| eukaryotic translation initiation factor 3, subunit 9 (eta)                                                                      | Eif3s9                             | 3.8±0.7    |

|                                                                                                                                  |                                                   |            |
|----------------------------------------------------------------------------------------------------------------------------------|---------------------------------------------------|------------|
| eukaryotic translation initiation factor 3, subunit C                                                                            | Eif3c                                             | 14.09±0.85 |
| eukaryotic translation initiation factor 3, subunit D                                                                            | Eif3d                                             | 4.13±0.42  |
| eukaryotic translation initiation factor 3, subunit E                                                                            | Eif3e                                             | 10.15±1.97 |
| eukaryotic translation initiation factor 3, subunit F                                                                            | Eif3f                                             | 4.07±0.23  |
| eukaryotic translation initiation factor 3, subunit G                                                                            | Eif3g                                             | 7.67±0.47  |
| eukaryotic translation initiation factor 3, subunit H                                                                            | Eif3h                                             | 11.64±0.82 |
| eukaryotic translation initiation factor 3, subunit K                                                                            | Eif3k                                             | 3.69±0.38  |
| eukaryotic translation initiation factor 4 gamma, 1                                                                              | Eif4g1                                            | 4.06±0.45  |
| eukaryotic translation initiation factor 4 gamma, 1 /// similar to eukaryotic translation initiation factor 4, gamma 1 isoform a | Eif4g1 /// LOC683907                              | 0.34±0.12  |
| eukaryotic translation initiation factor 4 gamma, 3 (predicted)                                                                  | Eif4g3_predicted                                  | 1.31±0.31  |
| eukaryotic translation initiation factor 4, gamma 2 (predicted)                                                                  | Eif4g2_predicted                                  | 32.66±1.48 |
| eukaryotic translation initiation factor 4A1                                                                                     | Eif4a1                                            | 8.6±0.49   |
| eukaryotic translation initiation factor 4A2                                                                                     | Eif4a2                                            | 17.18±0.97 |
| eukaryotic translation initiation factor 4B                                                                                      | Eif4b                                             | 4.7±0.65   |
| eukaryotic translation initiation factor 4E                                                                                      | Eif4e                                             | 8.19±0.58  |
| eukaryotic translation initiation factor 4E binding protein 2                                                                    | Eif4ebp2                                          | 9.67±0.32  |
| eukaryotic translation initiation factor 4E member 2 (predicted)                                                                 | Eif4e2_predicted                                  | 2.75±0.17  |
| eukaryotic translation initiation factor 4E nuclear import factor 1                                                              | Eif4enif1                                         | 1.59±0.08  |
| eukaryotic translation initiation factor 4H                                                                                      | Eif4h                                             | 9.03±0.97  |
| eukaryotic translation initiation factor 5                                                                                       | Eif5                                              | 10.66±0.53 |
| eukaryotic translation initiation factor 5A                                                                                      | Eif5a                                             | 18.15±1.74 |
| eukaryotic translation initiation factor 5B                                                                                      | Eif5b                                             | 1.82±0.11  |
| eukaryotic translation initiation factor 6                                                                                       | Eif6                                              | 8.76±0.99  |
| Eukaryotic translation termination factor 1                                                                                      | Etf1                                              | 2.97±0.59  |
| Ewing sarcoma breakpoint region 1                                                                                                | Ewsr1                                             | 1.96±0.19  |
| Ewing's tumor-associated antigen 1                                                                                               | Etaa1                                             | 0.7±0.14   |
| excision repair cross-complementing rodent repair deficiency, complementation group 1 (predicted)                                | Ercc1_predicted                                   | 0.82±0.2   |
| excision repair cross-complementing rodent repair deficiency, complementation group 3                                            | Ercc3                                             | 2.38±0.38  |
| excision repair cross-complementing rodent repair deficiency, complementation group 4                                            | Ercc4                                             | 0.7±0.18   |
| excision repair cross-complementing rodent repair deficiency, complementation group 5                                            | Ercc5                                             | 0.44±0.15  |
| excision repair cross-complementing rodent repair deficiency, complementation group 6 (predicted)                                | Ercc6_predicted                                   | 0.26±0.06  |
| excision repair cross-complementing rodent repair deficiency, complementation group 8                                            | Ercc8                                             | 0.35±0.06  |
| exocyst complex component 2                                                                                                      | Exoc2                                             | 1.51±0.2   |
| exocyst complex component 3                                                                                                      | Exoc3                                             | 3.37±0.28  |
| Exocyst complex component 4                                                                                                      | Exoc4                                             | 1.12±0.28  |
| exocyst complex component 5                                                                                                      | Exoc5                                             | 2.67±0.44  |
| exocyst complex component 6                                                                                                      | Exoc6                                             | 4.14±0.91  |
| exocyst complex component 7                                                                                                      | Exoc7                                             | 0.77±0.26  |
| exonuclease 3'-5' domain-like 2 (predicted)                                                                                      | Exdl2_predicted                                   | 0.86±0.06  |
| exosome component 3 (predicted)                                                                                                  | Exosc3_predicted                                  | 1.39±0.19  |
| Exosome component 4 (predicted)                                                                                                  | Exosc4_predicted                                  | 1.49±0.02  |
| exosome component 5 (predicted)                                                                                                  | Exosc5_predicted                                  | 1.43±0.45  |
| exosome component 7                                                                                                              | Exosc7                                            | 2.21±0.11  |
| exosome component 8 (predicted)                                                                                                  | Exosc8_predicted                                  | 0.32±0.17  |
| exosome component 9                                                                                                              | Exosc9                                            | 0.71±0.09  |
| exostoses (multiple) 1                                                                                                           | Ext1                                              | 1.25±0.33  |
| exostoses (multiple) 2 (predicted)                                                                                               | Ext2_predicted                                    | 1.74±0.23  |
| exportin 1, CRM1 homolog (yeast)                                                                                                 | Xpo1                                              | 3.62±0.5   |
| exportin 4 (predicted)                                                                                                           | Xpo4_predicted                                    | 0.91±0.1   |
| exportin 5 (predicted)                                                                                                           | Xpo5_predicted                                    | 0.52±0.15  |
| exportin 6                                                                                                                       | Xpo6                                              | 3.81±0.56  |
| exportin 7                                                                                                                       | Xpo7                                              | 2.99±0.2   |
| Exportin, tRNA (nuclear export receptor for tRNAs) (predicted)                                                                   | Xpot_predicted                                    | 8.57±1.6   |
| expressed in non-metastatic cells 1                                                                                              | Nme1                                              | 2.8±0.24   |
| expressed in non-metastatic cells 2                                                                                              | Nme2                                              | 35±2.2     |
| expressed in non-metastatic cells 4                                                                                              | Nme4                                              | 5.81±0.79  |
| Eyes absent 3 homolog (Drosophila) (predicted)                                                                                   | Eya3_predicted                                    | 1.31±0.09  |
| F11 receptor                                                                                                                     | F11r                                              | 8.05±0.98  |
| factor 8-associated gene A                                                                                                       | F8a                                               | 3.36±0.49  |
| family with sequence similarity 100, member A                                                                                    | Fam100a                                           | 0.48±0.17  |
| family with sequence similarity 103, member A1                                                                                   | Fam103a1                                          | 4.61±0.23  |
| family with sequence similarity 107, member B                                                                                    | Fam107b                                           | 13.07±0.81 |
| family with sequence similarity 108, member A1                                                                                   | Fam108a1                                          | 5.35±0.93  |
| family with sequence similarity 108, member C1                                                                                   | Fam108c1                                          | 34.87±0.68 |
| family with sequence similarity 110, member C                                                                                    | Fam110c                                           | 0.5±0.08   |
| family with sequence similarity 111, member A                                                                                    | Fam111a                                           | 0.27±0.73  |
| family with sequence similarity 113, member A                                                                                    | Fam113a                                           | 0.38±0.05  |
| family with sequence similarity 116, member A                                                                                    | Fam116a                                           | 0.71±0.25  |
| family with sequence similarity 117, member A                                                                                    | Fam117a                                           | 0.75±0.12  |
| family with sequence similarity 120A /// similar to Protein CXorf17 homolog /// hypothetical protein LOC683420                   | Fam120a /// LOC679485 /// LOC683420 /// LOC690938 | 15.6±0.86  |
| family with sequence similarity 120B                                                                                             | Fam120b                                           | 1.23±0.1   |
| family with sequence similarity 120C                                                                                             | FAM120C                                           | 0.89±0.13  |
| family with sequence similarity 122A                                                                                             | Fam122a                                           | 1.32±0.46  |
| family with sequence similarity 123A                                                                                             | Fam123a                                           | 1.35±0.26  |
| family with sequence similarity 125, member A                                                                                    | Fam125a                                           | 2.9±0.26   |
| family with sequence similarity 126, member B                                                                                    | Fam126b                                           | 5.22±0.39  |
| family with sequence similarity 128, member B                                                                                    | Fam128b                                           | 1.36±0.21  |
| family with sequence similarity 133, member B                                                                                    | Fam133b                                           | 2.06±0.43  |
| family with sequence similarity 134, member A                                                                                    | Fam134a                                           | 3.42±0.27  |
| family with sequence similarity 134, member B                                                                                    | Fam134b                                           | 28.65±0.34 |
| family with sequence similarity 134, member C                                                                                    | Fam134c                                           | 0.21±0.05  |
| family with sequence similarity 149, member B1                                                                                   | Fam149b1                                          | 1.04±0.08  |
| family with sequence similarity 151, member A                                                                                    | Fam151a                                           | 61.73±5.12 |
| family with sequence similarity 151, member B                                                                                    | Fam151b                                           | 0.94±0.15  |
| family with sequence similarity 152, member A                                                                                    | Fam152a                                           | 1.96±0.53  |

|                                                                     |                  |            |
|---------------------------------------------------------------------|------------------|------------|
| family with sequence similarity 152, member B                       | Fam152b          | 0.57±0.16  |
| family with sequence similarity 20, member B                        | Fam20b           | 1.12±0.45  |
| family with sequence similarity 20, member C                        | Fam20c           | 5.59±0.89  |
| family with sequence similarity 21, member C                        | Fam21c           | 8.72±0.68  |
| family with sequence similarity 3, member A                         | Fam3a            | 2.92±0.44  |
| family with sequence similarity 3, member C                         | Fam3c            | 3.49±0.77  |
| family with sequence similarity 32, member A                        | Fam32a           | 4.28±0.81  |
| family with sequence similarity 35, member A                        | Fam35a           | 0.96±0.23  |
| family with sequence similarity 40, member A                        | Fam40a           | 2.9±0.36   |
| family with sequence similarity 44, member B                        | Fam44b           | 0.91±0.13  |
| family with sequence similarity 45, member A                        | Fam45a           | 2.17±0.28  |
| family with sequence similarity 48, member A                        | Fam48a           | 1.62±0.29  |
| family with sequence similarity 49, member B                        | Fam49b           | 4.58±0.74  |
| family with sequence similarity 50, member A                        | FAM50A           | 5.71±0.74  |
| family with sequence similarity 54, member B                        | Fam54b           | 7.33±0.23  |
| family with sequence similarity 58, member B                        | Fam58b           | 1.02±0.17  |
| family with sequence similarity 69, member A                        | Fam69a           | 0.39±0.1   |
| family with sequence similarity 73, member B                        | Fam73b           | 1.53±0.27  |
| family with sequence similarity 76, member A                        | Fam76a           | 1.4±0.17   |
| family with sequence similarity 80, member B                        | Fam80b           | 1±0.22     |
| family with sequence similarity 82, member A                        | Fam82a           | 2.17±0.4   |
| family with sequence similarity 82, member C                        | Fam82c           | 3.55±0.1   |
| family with sequence similarity 92, member A1                       | Fam92a1          | 1.27±0.17  |
| family with sequence similarity 96, member A                        | Fam96a           | 7.45±0.91  |
| family with sequence similarity 96, member B                        | Fam96b           | 2.14±0.06  |
| family with sequence similarity 98, member A                        | Fam98a           | 3.1±0.33   |
| family with sequence similarity 98, member B                        | Fam98b           | 0.67±0.04  |
| Fanconi anemia, complementation group C                             | Fancc            | 0.76±0.08  |
| Fanconi anemia, complementation group E                             | Fance            | 0.24±0.1   |
| Fanconi anemia, complementation group L (predicted)                 | Fancl_predicted  | 1.01±0.04  |
| far upstream element (FUSE) binding protein 1                       | Fubp1            | 1.4±0.39   |
| farnesyl diphosphate farnesyl transferase 1                         | Fdft1            | 4.6±0.54   |
| farnesyl diphosphate synthetase                                     | Fdps             | 5.9±0.64   |
| farnesyltransferase, CAAX box, alpha                                | Fnta             | 2.76±0.47  |
| Fas (TNFRSF6) binding factor 1 (predicted)                          | Fbf1_predicted   | 0.28±0.1   |
| Fas apoptotic inhibitory molecule                                   | Faim             | 0.78±0.18  |
| Fas death domain-associated protein                                 | Daxx             | 0.5±0.23   |
| Fas-activated serine/threonine kinase                               | Fastk            | 1.24±0.15  |
| Fas-associated factor 1                                             | Faf1             | 2.81±0.2   |
| fasciculation and elongation protein zeta 2 (zygin II)              | Fez2             | 1.39±0.26  |
| FAST kinase domains 2                                               | Fastkd2          | 2.2±0.23   |
| FAST kinase domains 3                                               | Fastkd3          | 1.01±0.15  |
| FAT tumor suppressor homolog 1 (Drosophila)                         | Fat1             | 3.59±0.4   |
| fatty acid amide hydrolase                                          | Faah             | 0.7±0.06   |
| fatty acid binding protein 3, muscle and heart                      | Fabp3            | 21.26±1.88 |
| fatty acid desaturase 1                                             | Fads1            | 16.84±0.72 |
| fatty acid desaturase 2                                             | Fads2            | 2.8±0.55   |
| fatty acid desaturase 3                                             | Fads3            | 2.99±0.32  |
| fatty acid synthase                                                 | Fasn             | 2.04±0.51  |
| F-box and leucine-rich repeat protein 10                            | Fbxl10           | 0.64±0.14  |
| F-box and leucine-rich repeat protein 11 (predicted)                | Fbxl11_predicted | 1.57±0.22  |
| F-box and leucine-rich repeat protein 12                            | Fbxl12           | 0.46±0.05  |
| F-box and leucine-rich repeat protein 14 (predicted)                | Fbxl14_predicted | 0.85±0.16  |
| F-box and leucine-rich repeat protein 3                             | Fbxl3            | 1.2±0.11   |
| F-box and leucine-rich repeat protein 4 (predicted)                 | Fbxl4_predicted  | 2.67±0.11  |
| F-box and leucine-rich repeat protein 5 (predicted)                 | Fbxl5_predicted  | 4.82±0.14  |
| F-box and leucine-rich repeat protein 6                             | Fbxl6            | 0.84±0.15  |
| F-box and WD-40 domain protein 11 (predicted)                       | Fbxw11_predicted | 5±0.2      |
| F-box and WD-40 domain protein 2 (predicted)                        | Fbxw2_predicted  | 1.26±0.24  |
| F-box and WD-40 domain protein 4 (predicted)                        | Fbxw4_predicted  | 0.73±0.17  |
| F-box and WD-40 domain protein 5                                    | Fbxw5            | 6.02±0.73  |
| F-box and WD-40 domain protein 8 (predicted)                        | Fbxw8_predicted  | 1.48±0.65  |
| F-box and WD-40 domain protein 9                                    | Fbxw9            | 1.43±0.16  |
| F-box only protein 18 (predicted)                                   | Fbxo18_predicted | 2.46±0.06  |
| F-box protein 11                                                    | Fbxo11           | 2.45±0.09  |
| F-box protein 16                                                    | Fbxo16           | 0.22±0.08  |
| F-box protein 21                                                    | Fbxo21           | 1.28±0.12  |
| F-box protein 22                                                    | Fbxo22           | 2.58±0.23  |
| F-box protein 25                                                    | Fbxo25           | 0.98±0.1   |
| F-box protein 28 (predicted)                                        | Fbxo28_predicted | 0.55±0.04  |
| F-box protein 3                                                     | Fbxo3            | 6.04±0.56  |
| F-box protein 30                                                    | Fbxo30           | 1.2±0.23   |
| F-box protein 33                                                    | Fbxo33           | 1.6±0.52   |
| F-box protein 38 (predicted)                                        | Fbxo38_predicted | 1.53±0.36  |
| F-box protein 4                                                     | Fbxo4            | 2.02±0.39  |
| F-box protein 46                                                    | Fbxo46           | 0.24±0.09  |
| F-box protein 6                                                     | Fbxo6            | 4.43±0.54  |
| F-box protein 7                                                     | Fbxo7            | 2.65±0.46  |
| F-box protein 8                                                     | Fbxo8            | 1.77±0.17  |
| f-box protein 9                                                     | Fbxo9            | 4.51±0.1   |
| Fc receptor, IgG, alpha chain transporter                           | Fcgrt            | 7.42±0.87  |
| FCH and double SH3 domains 1 (predicted)                            | Fchsd1_predicted | 2.48±0.51  |
| FCH and double SH3 domains 2 (predicted)                            | Fchsd2_predicted | 0.3±0.05   |
| FCH domain only 2 (predicted)                                       | Fcho2_predicted  | 11.87±0.75 |
| feline leukemia virus subgroup C cellular receptor family, member 2 | Flvcr2           | 0.49±0.04  |
| fem-1 homolog c (C.elegans) (predicted)                             | Fem1c_predicted  | 1.84±0.57  |
| feminization 1 homolog a (C. elegans)                               | Fem1a            | 2.13±0.39  |

|                                                                                                   |                                    |            |
|---------------------------------------------------------------------------------------------------|------------------------------------|------------|
| fer-1-like 3, myoferlin (C. elegans)                                                              | Fer113                             | 1.48±0.44  |
| FERM domain containing 8                                                                          | Femd8                              | 1.95±0.21  |
| FERM, RhoGEF (Arhgef) and pleckstrin domain protein 1 (chondrocyte-derived) (predicted)           | Farp1_predicted                    | 0.2±0.07   |
| FERM, RhoGEF and pleckstrin domain protein 2 (predicted)                                          | Farp2_predicted                    | 0.57±0.06  |
| ferredoxin 1                                                                                      | Fdx1                               | 12.98±0.3  |
| ferredoxin 1-like                                                                                 | Fdx1l                              | 1.64±0.3   |
| ferredoxin reductase                                                                              | Fdxr                               | 0.74±0.09  |
| ferric-chelate reductase 1                                                                        | Frrs1                              | 0.72±0.07  |
| ferritin heavy chain 1                                                                            | Fth1                               | 58.9±3.36  |
| ferritin light chain 1                                                                            | Ftl1                               | 46.3±2.71  |
| ferrochelatase (predicted)                                                                        | Fech_predicted                     | 2.97±0.1   |
| fetal Alzheimer antigen (predicted)                                                               | Falz_predicted                     | 0.47±0.21  |
| FGF receptor activating protein 1                                                                 | Fraq1                              | 0.68±0.15  |
| FGFR1 oncogene partner 2                                                                          | Fgfr1op2                           | 0.62±0.14  |
| fibrillarin                                                                                       | Fbl                                | 3.53±0.26  |
| fibrinogen, alpha polypeptide                                                                     | Fga                                | 0.36±0.08  |
| fibroblast growth factor (acidic) intracellular binding protein                                   | Fibp                               | 2.51±0.34  |
| fibroblast growth factor 1                                                                        | Fgf1                               | 0.38±0.16  |
| fibroblast growth factor 13                                                                       | Fgf13                              | 2.75±0.14  |
| fibroblast growth factor 9                                                                        | Fgf9                               | 1.78±0.3   |
| Fibroblast growth factor receptor 1                                                               | Fgfr1                              | 0.95±0.18  |
| Fibroblast growth factor receptor 3                                                               | Fgfr3                              | 1.62±0.07  |
| fibroblast growth factor receptor 4                                                               | Fgfr4                              | 1.58±0.38  |
| fibroblast growth factor receptor substrate 2 (predicted)                                         | Frs2_predicted                     | 1.01±0.01  |
| fibroblast growth factor receptor substrate 3                                                     | Frs3                               | 0.26±0.15  |
| fibronectin 1                                                                                     | Fn1                                | 0.44±0.36  |
| fibronectin type III domain containing 3a (predicted)                                             | Fndc3a_predicted                   | 1.98±0.17  |
| fibronectin type III domain containing 3B (predicted)                                             | Fndc3b_predicted                   | 2.92±0.53  |
| FIG4 homolog (S. cerevisiae)                                                                      | Fig4                               | 1.44±0.15  |
| filamin, beta (predicted)                                                                         | Flnb_predicted                     | 2.51±0.02  |
| Finkel-Biskis-Reilly murine sarcoma virus (FBR-MuSV) ubiquitously expressed (fox derived) protein | Fau /// LOC687439 ///<br>LOC687780 | 27.78±2.18 |
| FIP1 like 1 (S. cerevisiae)                                                                       | Fip1l1                             | 1.46±0.39  |
| fission 1 (mitochondrial outer membrane) homolog (yeast)                                          | Fis1                               | 3.58±0.97  |
| fizzy/cell division cycle 20 related 1 (Drosophila) (predicted)                                   | Fzr1_predicted                     | 1.37±0.15  |
| FK506 binding protein 11                                                                          | Fkbp11                             | 0.38±0.04  |
| FK506 binding protein 12-rapamycin associated protein 1                                           | Frap1                              | 2.34±0.11  |
| FK506 binding protein 15                                                                          | Fkbp15                             | 3.67±0.36  |
| FK506 binding protein 1a                                                                          | Fkbp1a                             | 4.31±0.47  |
| FK506 binding protein 2 (predicted)                                                               | Fkbp2_predicted                    | 7.64±1.42  |
| FK506 binding protein 3 (predicted)                                                               | Fkbp3_predicted                    | 7.88±1.04  |
| FK506 binding protein 4                                                                           | Fkbp4                              | 4.11±0.38  |
| FK506 binding protein 5                                                                           | Fkbp5                              | 0.42±0.09  |
| FK506 binding protein 8                                                                           | Fkbp8                              | 2.92±1.37  |
| FK506 binding protein 9                                                                           | Fkbp9                              | 3.3±0.56   |
| FK506 binding protein-like                                                                        | Fkbp1                              | 0.69±0.06  |
| flavin adenine dinucleotide synthetase                                                            | Flad1                              | 1.36±0.2   |
| flavin containing monooxygenase 1                                                                 | Fmo1                               | 42.25±1.32 |
| flavin containing monooxygenase 2                                                                 | Fmo2                               | 3.97±1.82  |
| flavin containing monooxygenase 3                                                                 | Fmo3                               | 7.68±5.94  |
| flavin containing monooxygenase 4                                                                 | Fmo4                               | 7.32±0.82  |
| flavin containing monooxygenase 5                                                                 | Fmo5                               | 2.81±0.24  |
| flightless I homolog (Drosophila)                                                                 | Flii                               | 1.86±0.19  |
| flotillin 1                                                                                       | Flot1                              | 1.82±0.26  |
| flotillin 2                                                                                       | Flot2                              | 2±0.25     |
| FLT3-interacting zinc finger 1                                                                    | Fiz1                               | 0.53±0.22  |
| FLYWCH-type zinc finger 1                                                                         | Flywch1                            | 1.12±0.27  |
| folate hydrolase                                                                                  | Folh1                              | 8.37±0.64  |
| folate receptor 1 (adult)                                                                         | Folr1                              | 39.29±4.71 |
| folliculin                                                                                        | Fln                                | 4.47±0.65  |
| forkhead box J1                                                                                   | Foxj1                              | 0.24±0.05  |
| forkhead box J2                                                                                   | Foxj2                              | 0.65±0.47  |
| forkhead box J3 (predicted)                                                                       | Foxj3_predicted                    | 1.68±0.27  |
| forkhead box K2 (predicted)                                                                       | Foxk2_predicted                    | 0.75±0.11  |
| forkhead box N3                                                                                   | Foxn3                              | 0.92±0.05  |
| forkhead box O1                                                                                   | Foxo1                              | 0.47±0.14  |
| forkhead box O4                                                                                   | Foxo4                              | 1.03±0.12  |
| formin binding protein 1                                                                          | Fnbp1                              | 0.4±0.04   |
| formin binding protein 4                                                                          | Fnbp4                              | 1.71±0.3   |
| formin-like 1 (predicted)                                                                         | Fmnl1_predicted                    | 0.79±0.2   |
| Forty-two-three domain containing 1                                                               | Fytd1                              | 2.41±0.11  |
| four and a half LIM domains 1                                                                     | Fhl1                               | 1.5±0.25   |
| fractured callus expressed transcript 1                                                           | Fxc1                               | 2.02±0.14  |
| fragile histidine triad gene                                                                      | Fhit                               | 1.12±0.11  |
| fragile X mental retardation syndrome 1 homolog                                                   | Fmr1                               | 2.09±0.22  |
| fragile X mental retardation, autosomal homolog 1                                                 | Fxr1                               | 1.68±0.39  |
| fragile X mental retardation, autosomal homolog 2                                                 | Fxr2                               | 0.83±0.38  |
| frataxin (predicted)                                                                              | Fxn_predicted                      | 3.66±0.17  |
| frizzled homolog 1 (Drosophila)                                                                   | Fzd1                               | 14.5±0.12  |
| frizzled homolog 4 (Drosophila)                                                                   | Fzd4                               | 0.23±0.1   |
| frizzled homolog 8 (Drosophila)                                                                   | Fzd8                               | 0.36±0.19  |
| frizzled-related protein                                                                          | Frzb                               | 0.37±0.12  |
| fructosamine 3 kinase                                                                             | Fn3k                               | 6.48±0.2   |
| fructose-1,6-bisphosphatase 1                                                                     | Fbp1                               | 56.11±1.12 |
| fructose-1,6-bisphosphatase 2                                                                     | Fbp2                               | 0.37±0.1   |
| FSHD region gene 1 (predicted)                                                                    | Frg1_predicted                     | 0.73±0.2   |
| Ftsi homolog 1 (E. coli) (predicted)                                                              | Ftsj1_predicted                    | 0.26±0.14  |

|                                                                                                                               |                         |            |
|-------------------------------------------------------------------------------------------------------------------------------|-------------------------|------------|
| FtsJ homolog 2 (E. coli) (predicted)                                                                                          | Ftsj2_predicted         | 0.54±0.06  |
| FtsJ homolog 3 (E. coli)                                                                                                      | Ftsj3                   | 0.72±0.16  |
| fucokinase (predicted)                                                                                                        | Fuk_predicted           | 0.45±0.1   |
| fucosidase, alpha-L- 1, tissue                                                                                                | Fuca1                   | 39.84±1.75 |
| fucosidase, alpha-L- 2, plasma                                                                                                | Fuca2                   | 3.87±0.54  |
| fucosyltransferase 8                                                                                                          | Fut8                    | 4.69±0.45  |
| fukutin related protein                                                                                                       | Fkrp                    | 0.51±0.05  |
| Fukuyama type congenital muscular dystrophy homolog (human) (predicted)                                                       | Fcmd_predicted          | 2.98±0.48  |
| fumarate hydratase 1                                                                                                          | Fh1                     | 24.34±2.74 |
| fumarylacetoacetate hydrolase                                                                                                 | Fah                     | 23.24±2.09 |
| fumarylacetoacetate hydrolase domain containing 1                                                                             | Fahd1                   | 14.49±1.93 |
| fumarylacetoacetate hydrolase domain containing 2A (predicted)                                                                | Fahd2a_predicted        | 8.53±2.19  |
| FUN14 domain containing 1                                                                                                     | Fundc1                  | 0.55±0.2   |
| furin (paired basic amino acid cleaving enzyme)                                                                               | Furin                   | 3.67±0.29  |
| FUS interacting protein (serine-arginine rich) 1                                                                              | Fusip1                  | 0.55±0.1   |
| fused toes                                                                                                                    | Fts                     | 0.94±0.51  |
| fusion, derived from t(12;16) malignant liposarcoma (human)                                                                   | Fus                     | 3.75±0.75  |
| FXYD domain-containing ion transport regulator 2                                                                              | Fxyd2                   | 37.39±2.74 |
| FYVE and coiled-coil domain containing 1 (predicted)                                                                          | Fyco1_predicted         | 4.09±0.45  |
| G elongation factor, mitochondrial 1                                                                                          | Gfm1                    | 5.86±1.92  |
| G elongation factor, mitochondrial 2                                                                                          | Gfm2                    | 0.86±0.25  |
| G kinase anchoring protein 1                                                                                                  | Gkap1                   | 2.49±0.15  |
| G patch domain and KOW motifs                                                                                                 | Gpkow                   | 1.12±0.08  |
| G patch domain containing 4                                                                                                   | Gpatch4                 | 0.23±0.06  |
| G protein beta subunit-like                                                                                                   | Gbl                     | 0.37±0.03  |
| G protein pathway suppressor 1                                                                                                | Gps1                    | 15.54±0.72 |
| G protein pathway suppressor 2                                                                                                | Gps2                    | 1.12±0.31  |
| G protein pathway suppressor 2 (predicted)                                                                                    | Gps2_predicted          | 1.56±0.11  |
| G protein-coupled receptor 107 (predicted)                                                                                    | Gpr107_predicted        | 0.78±0.12  |
| G protein-coupled receptor 125 (predicted)                                                                                    | Gpr125_predicted        | 3.13±0.46  |
| G protein-coupled receptor 137B (predicted)                                                                                   | Gpr137b_predicted       | 5.25±0.55  |
| G protein-coupled receptor 146                                                                                                | Gpr146                  | 0.39±0.09  |
| G protein-coupled receptor 172B                                                                                               | Gpr172b                 | 3.43±0.45  |
| G protein-coupled receptor 175                                                                                                | Gpr175                  | 1±0.21     |
| G protein-coupled receptor 177                                                                                                | Gpr177                  | 3.82±0.5   |
| G protein-coupled receptor 180                                                                                                | Gpr180                  | 0.51±0.11  |
| G protein-coupled receptor 56                                                                                                 | Gpr56                   | 25.03±3.8  |
| G protein-coupled receptor 89 (predicted)                                                                                     | Gpr89_predicted         | 2.16±0.1   |
| G protein-coupled receptor associated sorting protein 1                                                                       | Gprasp1                 | 0.48±0.11  |
| G protein-coupled receptor associated sorting protein 2                                                                       | Gprasp2                 | 0.21±0.24  |
| G protein-coupled receptor kinase interactor 1                                                                                | Git1                    | 0.45±0.13  |
| G protein-coupled receptor kinase-interactor 2                                                                                | Git2                    | 0.23±0.01  |
| G protein-coupled receptor, family C, group 5, member C                                                                       | Gprc5c                  | 4.51±0.51  |
| G0/G1 switch gene 2                                                                                                           | G0s2                    | 17.44±0.57 |
| G1 to S phase transition 1                                                                                                    | Gsp1                    | 8.54±0.77  |
| GA repeat binding protein, alpha (predicted)                                                                                  | Gabpa_predicted         | 2.02±0.31  |
| GA repeat binding protein, beta 1 /// similar to GA binding protein transcription factor, beta subunit 2 (GABPB2) (predicted) | Gabpb1 ///              | 0.52±0.25  |
|                                                                                                                               | RGD1560391 predicted    |            |
| GABA(A) receptor-associated protein like 2                                                                                    | Gabarapl2               | 13.72±0.69 |
| galactokinase 1                                                                                                               | Galk1                   | 1.67±0.41  |
| galactokinase 2                                                                                                               | Galk2                   | 10.14±0.32 |
| galactose mutarotase                                                                                                          | Galm                    | 25.84±4.74 |
| galactose-1-phosphate uridyl transferase                                                                                      | Galt                    | 1.3±0.56   |
| galactosidase, alpha                                                                                                          | Gla                     | 2.04±0.22  |
| galactosidase, beta 1 (predicted)                                                                                             | Glb1_predicted          | 37.12±3.63 |
| galactosidase, beta 1-like 2                                                                                                  | Glb1l2                  | 0.69±0.18  |
| galectin-related protein                                                                                                      | Hspc159                 | 1.26±0.33  |
| gametogenetin binding protein 2                                                                                               | Ggnbp2                  | 4.89±0.72  |
| gamma-aminobutyric acid (GABA(A)) receptor-associated protein-like 1 (predicted)                                              | Gabarapl1_predicted /// | 2.73±0.42  |
|                                                                                                                               | MGC125167               |            |
| gamma-aminobutyric acid receptor associated protein                                                                           | Gabrap                  | 31.18±2.79 |
| gamma-glutamyl carboxylase                                                                                                    | Ggcx                    | 3.01±0.34  |
| gamma-glutamyl hydrolase                                                                                                      | Ggh                     | 18.09±2.24 |
| gamma-glutamyltransferase 1                                                                                                   | Ggt1                    | 5.4±4.87   |
| ganglioside-induced differentiation-associated-protein 2                                                                      | Gdap2                   | 0.66±0.12  |
| gap junction membrane channel protein beta 1                                                                                  | Gjb1                    | 2.05±0.14  |
| gap junction membrane channel protein beta 2                                                                                  | Gjb2                    | 5.7±1.5    |
| gap junction protein, alpha 1                                                                                                 | Gja1                    | 1.35±0.08  |
| GATA zinc finger domain containing 1                                                                                          | Gatad1                  | 2.29±0.49  |
| GATA zinc finger domain containing 2A                                                                                         | Gatad2a                 | 1.11±0.45  |
| GATA zinc finger domain containing 2B                                                                                         | Gatad2b                 | 0.25±0.22  |
| GCD14/PCMT domain containing protein RGD1359191                                                                               | RGD1359191              | 0.51±0.17  |
| GCN1 general control of amino-acid synthesis 1-like 1 (yeast) (predicted)                                                     | Gcn1l1_predicted        | 0.93±0.13  |
| GC-rich promoter binding protein 1                                                                                            | Gppb1                   | 3.81±0.77  |
| GDNF-inducible zinc finger protein 1                                                                                          | Gzf1                    | 2.07±0.3   |
| GDP dissociation inhibitor 2                                                                                                  | Gdi2                    | 35.55±3.25 |
| GDP-mannose pyrophosphorylase A                                                                                               | Gmppa                   | 1.72±0.33  |
| GDP-mannose pyrophosphorylase B (predicted)                                                                                   | Gmppb_predicted         | 0.46±0.12  |
| gem (nuclear organelle) associated protein 4                                                                                  | Gemin4                  | 0.41±0.1   |
| gem (nuclear organelle) associated protein 6                                                                                  | Gemin6                  | 2.36±0.43  |
| gem (nuclear organelle) associated protein 8                                                                                  | Gemin8                  | 1.02±0.1   |
| general transcription factor II E, polypeptide 2 (beta subunit) (predicted)                                                   | Gtf2e2_predicted        | 2.07±0.34  |
| general transcription factor II H, polypeptide 1 (predicted)                                                                  | Gtf2h1_predicted        | 1.95±0.13  |
| general transcription factor II H, polypeptide 2 (predicted)                                                                  | Gtf2h2_predicted        | 0.86±0.08  |
| general transcription factor II I                                                                                             | Gtf2i                   | 5.36±0.34  |
| general transcription factor II I repeat domain-containing 1                                                                  | Gtf2ird1                | 1.71±0.07  |
| general transcription factor IIa 2                                                                                            | Gtf2a2                  | 7.21±0.36  |



|                                                                                                                   |                                          |            |
|-------------------------------------------------------------------------------------------------------------------|------------------------------------------|------------|
| general transcription factor IIB                                                                                  | Gtf2b                                    | 2.4±0.24   |
| general transcription factor IIF, polypeptide 1                                                                   | Gtf2f1                                   | 0.93±0.1   |
| general transcription factor IIF, polypeptide 2                                                                   | Gtf2f2                                   | 0.74±0.04  |
| general transcription factor IIF, polypeptide 3                                                                   | Gtf2f3                                   | 0.67±0.17  |
| general transcription factor IIF, polypeptide 5                                                                   | Gtf2f5                                   | 5±0.44     |
| general transcription factor III A                                                                                | Gtf3a                                    | 1.03±0.22  |
| general transcription factor IIIC, polypeptide 2, beta                                                            | Gtf3c2                                   | 1.82±0.44  |
| general transcription factor IIIC, polypeptide 3                                                                  | Gtf3c3                                   | 0.77±0.24  |
| general transcription factor IIIC, polypeptide 4                                                                  | Gtf3c4                                   | 1.12±0.2   |
| general transcription factor IIIC, polypeptide 5 (predicted)                                                      | Gtf3c5_predicted                         | 0.39±0.04  |
| general transcription factor IIIC, polypeptide 6, alpha                                                           | Gtf3c6                                   | 1.13±0.16  |
| gephyrin                                                                                                          | Gphn                                     | 4.35±0.7   |
| geranylgeranyl diphosphate synthase 1                                                                             | Ggps1                                    | 0.58±0.16  |
| germ cell-less homolog 1 (Drosophila)                                                                             | Gmcl1                                    | 1.63±0.27  |
| GH3 domain containing                                                                                             | Ghdc                                     | 0.24±0.04  |
| GINS complex subunit 4 (Slc5 homolog)                                                                             | Gins4                                    | 0.51±0.06  |
| GIPC PDZ domain containing family, member 1                                                                       | Gipc1                                    | 0.89±0.38  |
| GIY-YIG domain containing 2                                                                                       | Giyd2                                    | 1±0.16     |
| GLE1 RNA export mediator-like (yeast)                                                                             | Gle1l                                    | 0.74±0.08  |
| glia maturation factor, beta                                                                                      | Gmfb                                     | 0.55±0.17  |
| glial cell line derived neurotrophic factor family receptor alpha 1                                               | Gfra1                                    | 1.02±0.08  |
| glial cell line derived neurotrophic factor family receptor alpha 2                                               | Gfra2                                    | 1.17±0.11  |
| glial cell line derived neurotrophic factor family receptor alpha 3                                               | Gfra3                                    | 1.1±0.18   |
| GLI-Kruppel family member HKR3                                                                                    | Hkr3                                     | 0.3±0.12   |
| glioma tumor suppressor candidate region gene 2                                                                   | Gltsr2                                   | 3.45±0.93  |
| GLIS family zinc finger 1 (predicted)                                                                             | Glis1_predicted                          | 1.11±0.18  |
| GLIS family zinc finger 2 (predicted)                                                                             | Glis2_predicted                          | 1.34±0.63  |
| glomulin, FKBP associated protein                                                                                 | Glmn                                     | 0.32±0.14  |
| glucan (1,4-alpha-), branching enzyme 1                                                                           | Gbe1                                     | 6.65±0.77  |
| glucocorticoid modulatory element binding protein 2                                                               | Gmeb2                                    | 0.51±0.11  |
| glucosamine (N-acetyl)-6-sulfatase                                                                                | Gns                                      | 29.84±2.04 |
| glucosamine (N-acetyl)-6-sulfatase /// similar to glucosamine (N-acetyl)-6-sulfatase                              | Gns /// LOC688338                        | 0.25±0.07  |
| glucosamine-6-phosphate deaminase 2 (predicted)                                                                   | Gnpda2_predicted                         | 0.24±0.02  |
| glucosamine-phosphate N-acetyltransferase 1                                                                       | Gnpnat1                                  | 2.24±0.54  |
| glucosaminyl (N-acetyl) transferase 2, I-branching enzyme                                                         | Gcnt2                                    | 5.22±0.86  |
| glucose 6 phosphatase, catalytic, 3                                                                               | G6pc3                                    | 1.11±0.28  |
| glucose phosphate isomerase                                                                                       | Gpi                                      | 25.61±1.35 |
| glucose-6-phosphatase, catalytic                                                                                  | G6pc                                     | 44.16±3.26 |
| glucose-6-phosphate dehydrogenase X-linked                                                                        | G6pdx                                    | 2.09±0.11  |
| glucosidase 1                                                                                                     | Gcs1                                     | 2.77±0.47  |
| glucosidase, alpha, acid                                                                                          | Gaa                                      | 7.62±0.84  |
| glucosidase, beta, acid 3 (cytosolic) (predicted)                                                                 | Gba3_predicted                           | 31.39±0.64 |
| glucuronidase, beta                                                                                               | Gusb                                     | 1.66±0.28  |
| glucuronyl C5-epimerase                                                                                           | Glce                                     | 0.78±0.11  |
| glutamate dehydrogenase 1                                                                                         | Glud1                                    | 34.48±0.62 |
| glutamate oxaloacetate transaminase 1, soluble                                                                    | Got1                                     | 5.23±0.89  |
| glutamate oxaloacetate transaminase 2, mitochondrial                                                              | Got2                                     | 29.76±2.4  |
| glutamate receptor, ionotropic, N-methyl D-aspartate-associated protein 1 (glutamate binding)                     | Grina                                    | 16.49±3.18 |
| glutamate receptor, ionotropic, N-methyl D-aspartate-like 1A                                                      | Grin1a                                   | 9.8±1.15   |
| glutamate receptor, metabotropic 4                                                                                | Grm4                                     | 0.25±0.08  |
| glutamate-ammonia ligase (glutamine synthetase)                                                                   | Glul                                     | 25.11±3.01 |
| glutamate-rich WD repeat containing 1                                                                             | Grwd1                                    | 0.53±0.17  |
| glutamic pyruvate transaminase (alanine aminotransferase) 2 (predicted)                                           | Gpt2_predicted                           | 0.31±0.05  |
| glutaminase                                                                                                       | Gis                                      | 6.56±0.83  |
| Glutamine and serine rich 1 (predicted)                                                                           | Qser1_predicted                          | 0.97±0.31  |
| glutamyl-tRNA synthase (glutamine-hydrolyzing)-like 1                                                             | Qrs1l                                    | 0.98±0.11  |
| glutamyl-tRNA synthetase /// similar to glutamyl-tRNA synthetase (predicted)                                      | Qars ///<br>RGD1562301 predicted         | 5.92±0.96  |
| glutamyl aminopeptidase                                                                                           | Enpep                                    | 14.59±0.44 |
| glutamyl-prolyl-tRNA synthetase                                                                                   | Eprs                                     | 6.37±1.22  |
| glutamyl-tRNA synthetase 2 mitochondrial (putative)                                                               | Ears2                                    | 0.29±0.13  |
| glutaredoxin 1 (thioltransferase)                                                                                 | Glrx1                                    | 2.12±0.24  |
| glutaredoxin 2 (thioltransferase)                                                                                 | Glrx2                                    | 6.92±0.36  |
| glutaredoxin 3                                                                                                    | Glrx3                                    | 8.14±2.14  |
| glutaredoxin 5 homolog (S. cerevisiae) (predicted)                                                                | Glrx5_predicted                          | 16.12±1.61 |
| glutaryl-Coenzyme A dehydrogenase (predicted)                                                                     | Gcdh_predicted                           | 27.95±1.68 |
| glutathione peroxidase 1                                                                                          | Gpx1                                     | 41.25±1.49 |
| glutathione peroxidase 2                                                                                          | Gpx2                                     | 1.24±0.34  |
| glutathione peroxidase 3                                                                                          | Gpx3                                     | 69.54±4.2  |
| glutathione peroxidase 4                                                                                          | Gpx4                                     | 26.01±3.99 |
| glutathione reductase                                                                                             | Gsr                                      | 2.9±0.16   |
| glutathione S-transferase A3                                                                                      | Gsta2 /// Gsta3 ///<br>LOC494499 /// Yc2 | 41.87±2.39 |
| glutathione S-transferase A3 /// glutathione-S-transferase, alpha type2 /// glutathione S-transferase Yc2 subunit | Gsta2 /// Gsta3 /// Yc2                  | 47.03±2.94 |
| glutathione S-transferase kappa 1                                                                                 | Gstk1                                    | 6.89±1.02  |
| glutathione S-transferase omega 1                                                                                 | Gsto1                                    | 26.99±0.63 |
| glutathione S-transferase theta 1                                                                                 | Gstt1                                    | 5.03±0.99  |
| glutathione S-transferase theta 1 /// glutathione S-transferase, theta 3                                          | Gstt1 /// Gstt3                          | 30.85±5.19 |
| glutathione S-transferase, alpha 4                                                                                | Gsta4                                    | 24.31±4.13 |
| glutathione S-transferase, C-terminal domain containing                                                           | Gstcd                                    | 0.26±0.06  |
| glutathione S-transferase, mu 1                                                                                   | Gstm1                                    | 4.13±0.63  |
| glutathione S-transferase, mu type 3                                                                              | Gstm3                                    | 1.9±0.16   |
| glutathione S-transferase, theta 2                                                                                | Gstt2                                    | 3.17±0.37  |
| glutathione synthetase                                                                                            | Gss                                      | 2.12±1.69  |
| glyceraldehyde-3-phosphate dehydrogenase                                                                          | Gapdh                                    | 60.99±2.36 |
| glyceraldehyde-3-phosphate dehydrogenase /// similar to glyceraldehyde-3-phosphate dehydrogenase                  | Gapdh /// LOC686275 ///<br>LOC689689     | 59.41±0.26 |

|                                                                            |                                               |            |
|----------------------------------------------------------------------------|-----------------------------------------------|------------|
| glycerol kinase                                                            | Gyk                                           | 16.71±1.19 |
| glycerol-3-phosphate dehydrogenase 1 (soluble)                             | Gpd1                                          | 14.3±1.28  |
| glyceronephosphate O-acyltransferase                                       | Gnpat                                         | 2.38±0.04  |
| glycerophosphodiester phosphodiesterase 1                                  | Gde1                                          | 21.19±2.52 |
| glycerophosphodiester phosphodiesterase domain containing 1 (predicted)    | Gdpd1_predicted                               | 0.2±0.16   |
| glycine amidinotransferase (L-arginine:glycine amidinotransferase)         | Gatm                                          | 67.55±5.45 |
| glycine C-acetyltransferase (2-amino-3-ketobutyrate-coenzyme A ligase)     | Gcat                                          | 6±0.74     |
| glycine cleavage system protein H (aminomethyl carrier)                    | Gcsh                                          | 35.91±2.19 |
| glycine decarboxylase (predicted)                                          | Gldc_predicted                                | 10.67±1.38 |
| glycine N-methyltransferase                                                | Gnmt                                          | 2.82±0.63  |
| glycine-, glutamate-, thienylcyclohexylpiperidine-binding protein          | LOC246295                                     | 1.84±0.16  |
| glycine-N-acyltransferase                                                  | Glyat                                         | 25.69±0.65 |
| glycogen synthase kinase 3 alpha                                           | Gsk3a                                         | 1.05±0.19  |
| glycogen synthase kinase 3 beta                                            | Gsk3b                                         | 0.71±0.14  |
| glycogenin 1                                                               | Gyg1                                          | 3.28±0.15  |
| glycolipid transfer protein domain containing 1                            | Gltpd1                                        | 1.17±0.06  |
| Glycoprotein galactosyltransferase alpha 1, 3                              | Ggta1                                         | 0.52±0.05  |
| glycoprotein m6a                                                           | Gpm6a                                         | 2.01±0.58  |
| glycoprotein, synaptic 2                                                   | Gpsn2                                         | 4.53±0.41  |
| glycosylphosphatidylinositol specific phospholipase D1                     | Gpld1                                         | 0.44±0.12  |
| glycosyltransferase 25 domain containing 1 (predicted)                     | Glt25d1_predicted                             | 0.78±0.12  |
| glycosyltransferase 8 domain containing 1                                  | Glt8d1                                        | 1.06±0.23  |
| glycosyltransferase-like 1B                                                | Gylt1b                                        | 0.89±0.06  |
| glycosyltransferase-like domain containing 1                               | Gtdc1                                         | 0.65±0.17  |
| glycyl-tRNA synthetase                                                     | Gars                                          | 4.07±0.3   |
| glyoxalase 1                                                               | Glo1                                          | 8.08±0.57  |
| glyoxalase domain containing 4                                             | Glod4                                         | 3.72±0.23  |
| glyoxalase domain containing 5                                             | Glod5                                         | 13.28±0.85 |
| glyoxylate reductase/hydroxypruvate reductase (predicted)                  | Grhpr_predicted                               | 41.51±2.78 |
| glypican 4                                                                 | Gpc4                                          | 15.24±2.28 |
| GM2 ganglioside activator protein                                          | Gm2a                                          | 0.45±0.3   |
| GNAS (guanine nucleotide binding protein, alpha stimulating) complex locus | Gnas                                          | 11.73±3.91 |
| golgi apparatus protein 1                                                  | Glg1                                          | 1.62±0.11  |
| golgi associated PDZ and coiled-coil motif containing (predicted)          | Gopc_predicted                                | 3.41±0.49  |
| golgi associated, gamma adaptin ear containing, ARF binding protein 1      | Gga1                                          | 0.63±0.1   |
| golgi associated, gamma adaptin ear containing, ARF binding protein 2      | Gga2                                          | 2.95±0.31  |
| golgi autoantigen, golgin subfamily a, 2                                   | Golga2                                        | 0.63±0.18  |
| golgi autoantigen, golgin subfamily a, 3 (predicted)                       | Golga3_predicted                              | 0.67±0.1   |
| golgi autoantigen, golgin subfamily a, 4                                   | Golga4                                        | 2.87±0.32  |
| golgi autoantigen, golgin subfamily a, 5                                   | Golga5                                        | 3.71±0.19  |
| golgi autoantigen, golgin subfamily a, 7                                   | Golga7                                        | 7.51±0.14  |
| golgi autoantigen, golgin subfamily b, macrogolgin 1                       | Golgb1                                        | 1.72±0.21  |
| golgi integral membrane protein 4                                          | Golim4                                        | 0.31±0.07  |
| golgi phosphoprotein 3                                                     | Golph3                                        | 1.77±0.37  |
| golgi phosphoprotein 3-like                                                | Golph3l                                       | 1.62±0.46  |
| golgi reassembly stacking protein 1                                        | Gorasp1                                       | 0.91±0.12  |
| golgi reassembly stacking protein 2                                        | Gorasp2                                       | 1.56±0.28  |
| Golgi SNAP receptor complex member 1                                       | Gosr1                                         | 1.77±0.42  |
| golgi SNAP receptor complex member 2                                       | Gosr2                                         | 11.2±0.71  |
| golgi-specific brefeldin A-resistance factor 1                             | Gbf1                                          | 1.46±0.07  |
| goliath                                                                    | LOC652955                                     | 3.54±0.27  |
| GPI-anchored membrane protein 1                                            | Gpiap1                                        | 11.1±0.88  |
| G-protein signalling modulator 2 (AGS3-like, C. elegans)                   | Gpsm2                                         | 0.39±0.12  |
| GRAM domain containing 1B (predicted)                                      | Gramd1b_predicted                             | 1.78±0.17  |
| GRAM domain containing 3                                                   | Gramd3                                        | 2.6±0.55   |
| granule cell antiserum positive 14                                         | Gcap14                                        | 3.22±0.23  |
| granulin                                                                   | Grn                                           | 14.67±1.34 |
| Granulocyte-macrophage colony stimulating receptor alpha                   | Csf2ra                                        | 0.28±0.18  |
| GRB10 interacting GYF protein 1                                            | Gigyf1                                        | 0.47±0.22  |
| G-rich RNA sequence binding factor 1                                       | Grsf1                                         | 10.92±0.48 |
| GRIP and coiled-coil domain containing 2                                   | Gcc2                                          | 3.69±0.44  |
| GRIP1 associated protein 1                                                 | Gripap1                                       | 0.51±0.12  |
| growth arrest and DNA-damage-inducible 45 alpha                            | Gadd45a                                       | 1.45±0.69  |
| growth arrest and DNA-damage-inducible 45 gamma                            | Gadd45g                                       | 0.46±0.38  |
| growth arrest and DNA-damage-inducible, gamma interacting protein 1        | Gadd45gip1                                    | 2.5±0.53   |
| growth arrest specific 5                                                   | Gas5                                          | 1.63±0.56  |
| growth arrest specific 6                                                   | Gas6                                          | 0.34±0.53  |
| growth arrest-specific 2                                                   | Gas2                                          | 11.85±0.87 |
| growth arrest-specific 2 like 1 (predicted)                                | Gas2l1_predicted                              | 0.98±0.19  |
| growth factor receptor bound protein 10                                    | Grb10                                         | 2.72±0.17  |
| growth factor receptor bound protein 14                                    | Grb14                                         | 0.27±0.05  |
| growth factor receptor bound protein 2                                     | Grb2                                          | 2.2±0.59   |
| growth factor receptor bound protein 2-associated protein 1 (predicted)    | Gab1_predicted                                | 2.38±0.46  |
| growth factor receptor bound protein 7                                     | Grb7                                          | 0.49±0.22  |
| growth factor, erv1 (S. cerevisiae)-like (augmenter of liver regeneration) | Gfer                                          | 1.06±0.19  |
| growth hormone inducible transmembrane protein                             | Ghitm                                         | 16±1.38    |
| growth hormone receptor                                                    | Ghr                                           | 6.06±0.31  |
| GrpE-like 1, mitochondrial                                                 | Grpel1                                        | 10.94±0.26 |
| GrpE-like 2, mitochondrial                                                 | Grpel2                                        | 1.08±0.23  |
| GSG1-like /// similar to germ cell associated 1 (predicted)                | Gsg1 /// LOC687697                            | 0.52±0.17  |
| GTP binding protein 1 (predicted)                                          | Gtbbp1_predicted                              | 0.74±0.18  |
| GTP binding protein 2                                                      | Gtbbp2                                        | 0.29±0.04  |
| GTP binding protein 3 (mitochondrial)                                      | Gtbbp3                                        | 0.68±0.17  |
| GTP binding protein 4                                                      | Gtbbp4 /// LOC689842 /// RGD1560805_predicted | 0.3±0.19   |
| GTP binding protein 5                                                      | Gtbbp5                                        | 1.63±0.13  |

|                                                                                                                 |                      |            |
|-----------------------------------------------------------------------------------------------------------------|----------------------|------------|
| GTP binding protein 6 (putative) (predicted)                                                                    | Gtpbp6_predicted     | 0.4±0.06   |
| GTP cyclohydrolase I feedback regulator                                                                         | Gchfr                | 6.66±0.56  |
| GTPase activating protein and VPS9 domains 1 (predicted)                                                        | Gapvd1_predicted     | 1.68±0.27  |
| GTPase activating RANGAP domain-like 1                                                                          | Garn1                | 1.67±0.33  |
| GTP-binding protein 10 (putative)                                                                               | Gtbbp10              | 0.97±0.26  |
| guanidinoacetate methyltransferase                                                                              | Gamt                 | 6.16±0.79  |
| guanine deaminase                                                                                               | Gda                  | 0.24±0.18  |
| guanine monophosphate synthetase                                                                                | Gmps                 | 3.66±0.2   |
| guanine nucleotide binding protein (G protein), beta 5                                                          | Gnb5                 | 0.96±0.03  |
| guanine nucleotide binding protein (G protein), beta polypeptide 2 like 1                                       | Gnb2l1               | 21.3±1.35  |
| guanine nucleotide binding protein (G protein), gamma 12                                                        | Gng12                | 4.1±0.5    |
| guanine nucleotide binding protein (G protein), gamma 5                                                         | Gng5                 | 16.36±0.95 |
| guanine nucleotide binding protein, alpha 11                                                                    | Gna11                | 0.3±0.07   |
| guanine nucleotide binding protein, alpha 12                                                                    | Gna12                | 1.07±0.15  |
| guanine nucleotide binding protein, alpha inhibiting 1                                                          | Gnai1                | 3.13±0.08  |
| guanine nucleotide binding protein, alpha inhibiting 3                                                          | Gnai3                | 5.41±0.52  |
| guanine nucleotide binding protein, beta 1                                                                      | Gnb1                 | 1.9±0.3    |
| guanine nucleotide binding protein, beta 2                                                                      | Gnb2                 | 2.57±1.03  |
| guanine nucleotide binding protein, beta 3                                                                      | Gnb3                 | 0.57±0.06  |
| guanine nucleotide binding protein-like 1                                                                       | Gnl1                 | 1.02±0.08  |
| guanine nucleotide binding protein-like 2 (nucleolar)                                                           | Gnl2                 | 1.02±0.21  |
| guanine nucleotide binding protein-like 3 (nucleolar)                                                           | Gnl3                 | 3.33±0.25  |
| guanosine diphosphate dissociation inhibitor 1                                                                  | Gdi1                 | 5.5±0.29   |
| guanosine monophosphate reductase 2                                                                             | Gmpr2                | 1.19±0.13  |
| guanylate cyclase activator 2b (retina)                                                                         | Guca2b               | 0.35±0.22  |
| guanylate kinase 1                                                                                              | Guk1                 | 4.59±0.75  |
| gypsy retrotransposon integrase 1                                                                               | Gin1                 | 0.95±0.11  |
| H1 histone family, member O                                                                                     | H1f0                 | 1.09±0.66  |
| H2A histone family, member J                                                                                    | H2afj                | 4.33±1.48  |
| H2A histone family, member V (predicted)                                                                        | H2afv_predicted ///  | 4.34±0.31  |
|                                                                                                                 | LOC685909 ///        |            |
|                                                                                                                 | RGD1560813_predicted |            |
| H2A histone family, member X                                                                                    | H2afx                | 0.64±0.2   |
| H2A histone family, member Y                                                                                    | H2afy                | 1.45±0.85  |
| H2A histone family, member Z                                                                                    | H2afz                | 24.61±1.64 |
| H3 histone, family 3B                                                                                           | H3f3b                | 16.15±1.33 |
| hairy and enhancer of split 6 (Drosophila)                                                                      | Hes6                 | 13.09±0.17 |
| haloacid dehalogenase-like hydrolase domain containing 2                                                        | Hdh2                 | 1.28±0.16  |
| haloacid dehalogenase-like hydrolase domain containing 3                                                        | Hdh3                 | 1.89±0.32  |
| Harvey rat sarcoma oncogene, subgroup R (predicted)                                                             | Rras_predicted       | 0.56±0.26  |
| Harvey rat sarcoma virus oncogene                                                                               | Hras                 | 4.5±0.68   |
| Hbs1-like (S. cerevisiae)                                                                                       | Hbs1l                | 3.12±0.09  |
| HCLS1 binding protein 3                                                                                         | Hs1bp3               | 2.05±0.75  |
| HD domain containing 2 (predicted)                                                                              | Hddc2_predicted      | 0.71±0.07  |
| HD domain containing 3 (predicted)                                                                              | Hddc3_predicted      | 4.86±0.13  |
| headcase homolog (Drosophila) (predicted)                                                                       | Heca_predicted       | 1.19±0.17  |
| HEAT repeat containing 2                                                                                        | Heatr2               | 1.53±0.2   |
| HEAT repeat containing 5A                                                                                       | Heatr5a              | 0.51±0.09  |
| HEAT repeat containing 5B                                                                                       | Heatr5b              | 0.92±0.14  |
| HEAT repeat containing 6                                                                                        | Heatr6               | 0.22±0.03  |
| heat shock 10 kDa protein 1 (chaperonin 10)                                                                     | Hspe1                | 41.5±2.92  |
| heat shock 105kDa/110kDa protein 1                                                                              | Hsph1                | 6.31±1.32  |
| heat shock 70kDa protein 12A (predicted)                                                                        | Hspa12a_predicted    | 2.32±0.28  |
| heat shock factor 2                                                                                             | Hsf2                 | 4.17±0.34  |
| heat shock factor binding protein 1                                                                             | Hsbp1                | 9.07±0.56  |
| heat shock protein 1 (chaperonin)                                                                               | Hspd1                | 41.76±1.58 |
| heat shock protein 14                                                                                           | Hspa14               | 0.95±0.13  |
| heat shock protein 4                                                                                            | Hspa4                | 0.27±0.46  |
| heat shock protein 5                                                                                            | Hspa5                | 29.47±9.51 |
| heat shock protein 8                                                                                            | Hspa8                | 44.32±1.39 |
| heat shock protein 9                                                                                            | Hspa9                | 15.99±0.51 |
| heat shock protein 9                                                                                            | Hspa9 ///            | 0.26±0.08  |
| heat shock protein 90, alpha (cytosolic), class A member 1                                                      | Hsp90aa1             | 30.48±2.47 |
| heat shock protein 90kDa alpha (cytosolic), class B member 1                                                    | Hsp90ab1             | 15.61±0.38 |
| heat shock transcription factor 1                                                                               | Hsf1                 | 0.3±0.08   |
| heat-responsive protein 12                                                                                      | Hrsp12               | 53.2±6.86  |
| hect (homologous to the E6-AP (UBE3A) carboxyl terminus) domain and RCC1 (CHC1)-like domain (RLD) 1 (predicted) | Herc1_predicted      | 1.86±0.42  |
| hect (homologous to the E6-AP (UBE3A) carboxyl terminus) domain and RCC1 (CHC1)-like domain (RLD) 2 (predicted) | Herc2_predicted      | 0.85±0.17  |
| HECT domain and ankyrin repeat containing, E3 ubiquitin protein liqase 1 (predicted)                            | Hace1_predicted      | 0.6±0.22   |
| hect domain and RLD 3 (predicted)                                                                               | Herc3_predicted      | 2.2±0.17   |
| hect domain and RLD 4                                                                                           | Herc4                | 2.71±0.33  |
| HECT domain containing 1                                                                                        | Hectd1               | 6.32±0.2   |
| helicase with zinc finger domain (predicted)                                                                    | Helz_predicted       | 0.5±0.23   |
| helicase-like transcription factor                                                                              | Hltf                 | 0.2±0.13   |
| hematological and neurological expressed 1-like                                                                 | Hn1l                 | 3.29±0.11  |
| hematological and neurological expressed sequence 1                                                             | Hn1                  | 1.94±0.66  |
| heme oxygenase (decycling) 2                                                                                    | Hmox2                | 4±0.31     |
| HemK methyltransferase family member 1 (predicted)                                                              | Hemk1_predicted      | 0.38±0.17  |
| hemoglobin, theta 1 (predicted)                                                                                 | Hbq1_predicted       | 0.55±0.06  |
| heparan sulfate 2-O-sulfotransferase 1                                                                          | Hs2st1               | 2.71±0.1   |
| heparan sulfate 6-O-sulfotransferase 1 (predicted)                                                              | Hs6st1_predicted     | 1.83±0.27  |
| hepatic nuclear factor 4, alpha                                                                                 | Hnf4a                | 2.49±0.39  |
| hepatitis B virus x interacting protein (predicted)                                                             | Hbxip_predicted      | 22.67±1.55 |
| hepatocyte growth factor activator                                                                              | Hgfac                | 0.69±0.1   |
| hepatoma-derived growth factor                                                                                  | Hdgf                 | 2.62±0.39  |
| hepatoma-derived growth factor, related protein 2                                                               | Hdgrp2               | 0.74±0.06  |
| hepsin                                                                                                          | Hpn                  | 4.61±0.64  |

|                                                                                                                        |                          |            |
|------------------------------------------------------------------------------------------------------------------------|--------------------------|------------|
| Hermansky-Pudlak syndrome 1 homolog (human)                                                                            | Hps1                     | 3.34±0.52  |
| Hermansky-Pudlak syndrome 3 homolog (human) (predicted)                                                                | Hps3_predicted           | 0.83±0.25  |
| Hermansky-Pudlak syndrome 4 homolog (human) (predicted)                                                                | Hps4_predicted           | 0.64±0.06  |
| HERPUD family member 2                                                                                                 | Herpud2                  | 2.27±0.22  |
| heterochromatin protein 1, binding protein 3                                                                           | Hp1bp3                   | 4.23±0.41  |
| heterogeneous nuclear ribonucleoprotein A/B                                                                            | Hnrpab                   | 11.28±2.9  |
| heterogeneous nuclear ribonucleoprotein A1                                                                             | Hnrmpa1                  | 1.73±0.51  |
| heterogeneous nuclear ribonucleoprotein A2/B1 /// similar to heterogeneous nuclear ribonucleoprotein A2/B1 (predicted) | Hnrmpa2b1 ///            | 2±0.81     |
|                                                                                                                        | RGD1562992_predicted     |            |
| heterogeneous nuclear ribonucleoprotein A3                                                                             | Hnrpa3                   | 19.89±2.28 |
| heterogeneous nuclear ribonucleoprotein C                                                                              | Hnrnpc                   | 4.76±0.36  |
| heterogeneous nuclear ribonucleoprotein D                                                                              | Hnrpd                    | 1.08±0.09  |
| heterogeneous nuclear ribonucleoprotein D-like                                                                         | Hnrpdl                   | 2.26±0.42  |
| heterogeneous nuclear ribonucleoprotein F                                                                              | Hnrpf                    | 5.18±0.57  |
| heterogeneous nuclear ribonucleoprotein H1                                                                             | Hnrph1                   | 7.25±1.13  |
| heterogeneous nuclear ribonucleoprotein H3                                                                             | Hnrph3                   | 0.45±0.32  |
| heterogeneous nuclear ribonucleoprotein K                                                                              | Hnrpk                    | 18.37±1.36 |
| heterogeneous nuclear ribonucleoprotein L                                                                              | Hnrnpl                   | 12.54±0.46 |
| heterogeneous nuclear ribonucleoprotein L-like (predicted)                                                             | Hnrpll_predicted         | 2.07±0.14  |
| heterogeneous nuclear ribonucleoprotein M                                                                              | Hnrpm                    | 1.93±0.5   |
| heterogeneous nuclear ribonucleoprotein R                                                                              | Hnrmpr                   | 4.04±0.22  |
| heterogeneous nuclear ribonucleoprotein U                                                                              | Hnrmpu                   | 6.04±0.7   |
| heterogeneous nuclear ribonucleoprotein U-like 1 (predicted)                                                           | Hnrpu1_predicted         | 0.72±0.2   |
| hexamethylene bis-acetamide inducible 1                                                                                | Hexim1                   | 9.52±0.75  |
| hexosaminidase A                                                                                                       | Hexa                     | 32.74±4.67 |
| hexosaminidase B                                                                                                       | Hexb                     | 42.38±1.97 |
| hexose-6-phosphate dehydrogenase (glucose 1-dehydrogenase) (predicted)                                                 | H6pd_predicted           | 1.66±0.45  |
| HGF-regulated tyrosine kinase substrate                                                                                | Hgs                      | 2.55±0.3   |
| HIG1 domain family, member 1A                                                                                          | Higd1a                   | 8.46±0.2   |
| HIG1 domain family, member 2A (predicted)                                                                              | Higd2a_predicted         | 9.67±0.67  |
| high density lipoprotein binding protein                                                                               | Hdlbp                    | 5.28±0.43  |
| high mobility group 20 B (predicted)                                                                                   | Hmg20b_predicted         | 0.57±0.15  |
| high mobility group 20A (predicted)                                                                                    | Hmg20a_predicted         | 0.81±0.04  |
| high mobility group AT-hook 1                                                                                          | Hmga1                    | 0.31±0.21  |
| high mobility group box 1                                                                                              | Hmgb1                    | 10.94±0.92 |
| high mobility group box 1                                                                                              | Hmgb1 ///                | 16.05±0.75 |
|                                                                                                                        | LOC679571 ///            |            |
|                                                                                                                        | LOC680765 ///            |            |
|                                                                                                                        | LOC681718 ///            |            |
|                                                                                                                        | RGD1562312_predicted /// |            |
|                                                                                                                        | RGD1563012_predicted /// |            |
|                                                                                                                        | RGD1563786_predicted     |            |
|                                                                                                                        |                          |            |
| high mobility group box 2                                                                                              | Hmgb2                    | 1.02±0.66  |
| high mobility group box 3                                                                                              | Hmgb3                    | 1.96±0.23  |
| high mobility group box transcription factor 1                                                                         | Hbp1                     | 2.54±0.14  |
| high mobility group nucleosomal binding domain 1                                                                       | Hmgn1                    | 20.54±1.67 |
| high mobility group nucleosomal binding domain 2                                                                       | Hmgn2                    | 12.5±1.71  |
| hippocalcin-like 1                                                                                                     | Hpcal1                   | 3±0.87     |
| hippocampus abundant gene transcript 1 (predicted)                                                                     | Hiat1_predicted          | 5.29±0.14  |
| hippocampus abundant transcript-like 1                                                                                 | Hiat1                    | 3.8±0.07   |
| HIRA interacting protein 3                                                                                             | Hirip3                   | 0.49±0.19  |
| histidine acid phosphatase domain containing 2A                                                                        | Hisppd2a                 | 0.6±0.2    |
| histidine triad nucleotide binding protein 2 (predicted)                                                               | Hint2_predicted          | 18.64±2.14 |
| histidine triad nucleotide binding protein 3                                                                           | Hint3                    | 3.52±0.09  |
| histidine-rich glycoprotein                                                                                            | Hrg                      | 3.4±0.43   |
| histocompatibility 13 (predicted)                                                                                      | H13_predicted            | 3.18±0.54  |
| histone aminotransferase 1                                                                                             | Hat1                     | 3.05±0.85  |
| histone cluster 1, H2b1 /// histone cluster 1, H2b /// similar to Histone H2B 291B                                     | Hist1h2bc ///            | 4.71±0.05  |
|                                                                                                                        | Hist1h2b1 ///            |            |
|                                                                                                                        | LOC684797                |            |
| histone cluster 1, H4b                                                                                                 | Hist1h4b                 | 6.69±1.32  |
| histone cluster 2, H2aa1 /// similar to H2A histone family, member O                                                   | Hist2h2aa1 ///           | 0.28±0.27  |
|                                                                                                                        | LOC690131                |            |
|                                                                                                                        |                          |            |
| histone cluster 3, H2a                                                                                                 | Hist3h2a                 | 1.58±0.06  |
| histone deacetylase 1 (predicted)                                                                                      | Hdac1_predicted          | 0.29±0.13  |
| histone deacetylase 1 /// histone deacetylase 1 (predicted)                                                            | Hdac1 ///                | 0.52±0.19  |
|                                                                                                                        |                          |            |
| histone deacetylase 2                                                                                                  | Hdac2                    | 4.71±0.08  |
| histone deacetylase 3                                                                                                  | Hdac3                    | 2.94±0.42  |
| histone deacetylase 5                                                                                                  | Hdac5                    | 0.34±0.16  |
| histone deacetylase 8 (predicted)                                                                                      | Hdac8_predicted          | 0.3±0.18   |
| histone H4 variant H4-v.1 (predicted)                                                                                  | RGD1562378_predicted     | 0.23±0.12  |
| HIV TAT specific factor 1 (predicted)                                                                                  | Htatsf1_predicted        | 1.58±0.27  |
| HIV-1 Rev binding protein 2 (predicted)                                                                                | Hrb2_predicted           | 1.5±0.28   |
| HIV-1 tat interactive protein, homolog (human)                                                                         | Htatip                   | 1.06±0.18  |
| HLA-B associated transcript 5                                                                                          | Bat5                     | 4.12±0.23  |
| HLA-B-associated transcript 1A                                                                                         | Bat1a                    | 3.43±0.98  |
| HLA-B-associated transcript 3                                                                                          | Bat3                     | 0.94±0.22  |
| HNF1 homeobox A                                                                                                        | Hnf1a                    | 2.81±0.24  |
| HNF1 homeobox B                                                                                                        | Hnf1b                    | 2.56±0.64  |
| hnRNP-associated with lethal yellow                                                                                    | Raly                     | 0.3±0.27   |
| holocytochrome c synthetase (predicted)                                                                                | Hccs_predicted           | 4.82±0.6   |
| homeo box A10                                                                                                          | Hoxa10                   | 1.05±0.24  |
| homeo box A4                                                                                                           | Hoxa4                    | 0.42±0.18  |

|                                                                                                                                       |                      |            |
|---------------------------------------------------------------------------------------------------------------------------------------|----------------------|------------|
| homeo box A5                                                                                                                          | Hoxa5                | 1.29±0.19  |
| homeo box A9 (predicted)                                                                                                              | Hoxa9_predicted      | 1.63±0.41  |
| homeobox A9                                                                                                                           | Hoxa9                | 0.51±0.12  |
| homeodomain interacting protein kinase 1 (predicted)                                                                                  | Hipk1_predicted      | 1.3±0.09   |
| Homeodomain interacting protein kinase 2 (predicted)                                                                                  | Hipk2_predicted      | 4.24±1.28  |
| homer homolog 1 (Drosophila)                                                                                                          | Homer1               | 4.11±0.68  |
| homer homolog 2 (Drosophila)                                                                                                          | Homer2               | 0.96±0.1   |
| homocysteine-inducible, endoplasmic reticulum stress-inducible, ubiquitin-like domain member 1                                        | Herpud1              | 7.47±1.77  |
| homogentisate 1, 2-dioxygenase                                                                                                        | Hgd                  | 11.39±0.85 |
| homolog of zebrafish ES1                                                                                                              | RGD1303003           | 6.25±0.72  |
| hook homolog 1 (Drosophila) (predicted)                                                                                               | Hook1_predicted      | 11.2±0.42  |
| hook homolog 2 (Drosophila)                                                                                                           | Hook2                | 3.25±0.08  |
| hook homolog 3 (Drosophila)                                                                                                           | Hook3                | 1.89±0.11  |
| hormone-regulated proliferation associated protein 20                                                                                 | Hrpap20              | 3.83±0.69  |
| host cell factor C1 (predicted)                                                                                                       | Hcfc1_predicted      | 1.68±0.44  |
| host cell factor C1 regulator 1 (XPO1-dependent)                                                                                      | Hcfc1r1              | 3.16±0.84  |
| host cell factor C2                                                                                                                   | Hcfc2                | 1.22±0.23  |
| HpaII tiny fragments locus 9c                                                                                                         | Htf9c                | 0.95±0.15  |
| HRAS like suppressor 3                                                                                                                | Hrasls3              | 4.83±0.54  |
| HscB iron-sulfur cluster co-chaperone homolog (E. coli)                                                                               | Hscb                 | 0.95±0.13  |
| hsp70-interacting protein                                                                                                             | Hspbp1               | 1.45±0.37  |
| Hspb associated protein 1                                                                                                             | Hspbp1               | 2.96±0.9   |
| HtrA serine peptidase 1                                                                                                               | Htra1                | 5.39±0.37  |
| HtrA serine peptidase 2                                                                                                               | Htra2                | 1.49±0.16  |
| human immunodeficiency virus type I enhancer binding protein 1                                                                        | Hivep1               | 0.3±0.12   |
| human immunodeficiency virus type I enhancer binding protein 2                                                                        | Hivep2               | 0.2±0.06   |
| huntingtin interacting protein 1 related                                                                                              | Hip1r                | 0.62±0.11  |
| huntingtin interacting protein 2 (predicted)                                                                                          | Hip2_predicted       | 8.84±0.91  |
| Huntingtin interacting protein K                                                                                                      | Hypk                 | 5.1±0.71   |
| HUS1 checkpoint homolog (S. pombe)                                                                                                    | Hus1                 | 1.31±0.35  |
| hyaluronan mediated motility receptor (RHAMM)                                                                                         | Hmnr                 | 0.74±0.3   |
| hyaluronic acid binding protein 4 (predicted)                                                                                         | Habp4_predicted      | 2.12±0.18  |
| hyaluronoglucosaminidase 2                                                                                                            | Hyal2                | 0.85±0.11  |
| hyaluronoglucosaminidase 3                                                                                                            | Hyal3                | 0.82±0.33  |
| hydroxyacid oxidase 1, liver                                                                                                          | Hao1                 | 1.97±0.71  |
| hydroxyacid oxidase 2 (long chain)                                                                                                    | Hao2                 | 63.55±0.41 |
| hydroxyacyl glutathione hydrolase                                                                                                     | Hagh                 | 17.99±1.54 |
| hydroxyacyl-Coenzyme A dehydrogenase                                                                                                  | Hadh                 | 28.06±0.9  |
| hydroxyacyl-Coenzyme A dehydrogenase/3-ketoacyl-Coenzyme A thiolase/enoyl-Coenzyme A hydratase (trifunctional protein), alpha subunit | Hadha                | 10.95±1.14 |
| hydroxyacyl-Coenzyme A dehydrogenase/3-ketoacyl-Coenzyme A thiolase/enoyl-Coenzyme A hydratase (trifunctional protein), beta subunit  | Hadhb                | 23.88±0.6  |
| hydroxy-delta-5-steroid dehydrogenase, 3 beta- and steroid delta-isomerase 7                                                          | Hsd3b7               | 0.41±0.09  |
| hydroxymethylbilane synthase                                                                                                          | Hmbs                 | 2.18±0.3   |
| hydroxyprostaglandin dehydrogenase 15 (NAD)                                                                                           | Hpgd                 | 0.81±0.63  |
| hydroxysteroid (17-beta) dehydrogenase 1                                                                                              | Hsd17b1              | 1.36±0.11  |
| hydroxysteroid (17-beta) dehydrogenase 10                                                                                             | Hsd17b10             | 17.42±2.21 |
| hydroxysteroid (17-beta) dehydrogenase 11                                                                                             | Hsd17b11             | 11.05±0.91 |
| hydroxysteroid (17-beta) dehydrogenase 12                                                                                             | Hsd17b12             | 5.24±0.8   |
| hydroxysteroid (17-beta) dehydrogenase 2                                                                                              | Hsd17b2              | 2.06±0.22  |
| hydroxysteroid (17-beta) dehydrogenase 4                                                                                              | Hsd17b4              | 18.63±0.65 |
| hydroxysteroid (17-beta) dehydrogenase 8                                                                                              | Hsd17b8              | 2.83±0.92  |
| hydroxysteroid 11-beta dehydrogenase 1                                                                                                | Hsd11b1              | 24.97±3.07 |
| hydroxysteroid dehydrogenase like 2                                                                                                   | Hsd12                | 14.01±2.46 |
| hyperpolarization-activated cyclic nucleotide-gated potassium channel 1                                                               | Hcn1                 | 0.24±0.09  |
| hypothetical gene supported by BC088439                                                                                               | LOC500947            | 1.06±0.08  |
| hypothetical gene supported by NM_172157                                                                                              | LOC497729            | 3.1±1.08   |
| hypothetical LOC100125371                                                                                                             | LOC100125371         | 1.55±0.22  |
| hypothetical LOC287306 (predicted)                                                                                                    | RGD1307036_predicted | 0.73±0.08  |
| hypothetical LOC287388 (predicted)                                                                                                    | RGD1310324_predicted | 0.46±0.03  |
| hypothetical LOC288978                                                                                                                | LOC288978            | 0.5±0.05   |
| hypothetical LOC290577                                                                                                                | LOC290577            | 3.25±0.08  |
| hypothetical LOC291982 (predicted) /// similar to autoantigen                                                                         | LOC361399 ///        | 0.48±0.14  |
| hypothetical LOC294030                                                                                                                | RGD1309136 predicted |            |
| hypothetical LOC294883                                                                                                                | RGD1305481           | 3.47±0.48  |
| hypothetical LOC298018                                                                                                                | RGD1305844           | 1±0.07     |
| hypothetical LOC301124                                                                                                                | LOC298018            | 0.31±0.17  |
| hypothetical LOC302495                                                                                                                | LOC301124            | 15.88±1.52 |
| hypothetical LOC304650 (predicted)                                                                                                    | LOC302495            | 0.71±0.15  |
| hypothetical LOC305452 (predicted)                                                                                                    | RGD1310262_predicted | 2.53±0.12  |
| hypothetical LOC305552 (predicted)                                                                                                    | RGD1309634_predicted | 0.62±0.12  |
| hypothetical LOC306766                                                                                                                | RGD1309501_predicted | 0.25±0.07  |
| hypothetical LOC308765 (predicted) /// hypothetical protein LOC685841                                                                 | LOC306766            | 29.35±4.72 |
| hypothetical LOC308869                                                                                                                | LOC685841 ///        | 1.17±0.18  |
| hypothetical LOC310540                                                                                                                | RGD1311021 predicted |            |
| hypothetical LOC311134                                                                                                                | MGC72560             | 7.08±0.59  |
| hypothetical LOC361153                                                                                                                | MGC72614             | 3.14±0.53  |
| hypothetical LOC362564                                                                                                                | LOC311134            | 0.49±0.06  |
| hypothetical LOC366300                                                                                                                | LOC361153            | 0.82±0.25  |
| hypothetical LOC500532                                                                                                                | LOC362564            | 0.91±0.25  |
| hypothetical protein Dd25                                                                                                             | LOC366300            | 5.33±0.49  |
| hypothetical protein LK44                                                                                                             | LOC500532            | 1.37±0.33  |
| hypothetical protein LOC100125364                                                                                                     | Dd25                 | 1.54±0.16  |
| hypothetical protein LOC100125365                                                                                                     | RGD735140            | 1.16±0.06  |
| hypothetical protein LOC292764                                                                                                        | rCG_22919            | 1.96±0.23  |
|                                                                                                                                       | LOC100125365         | 1.03±0.46  |
|                                                                                                                                       | RGD1303117           | 0.53±0.11  |

|                                                                         |                         |            |
|-------------------------------------------------------------------------|-------------------------|------------|
| hypothetical protein LOC303332                                          | LOC303332               | 2.63±0.21  |
| hypothetical protein LOC307347                                          | LOC307347               | 7.39±0.51  |
| Hypothetical protein LOC311254                                          | LOC311254               | 0.99±0.07  |
| hypothetical protein LOC361335                                          | LOC361335               | 1.71±0.21  |
| hypothetical protein LOC498154                                          | LOC498154               | 0.79±0.15  |
| hypothetical protein LOC498606                                          | LOC498606               | 1.29±0.07  |
| hypothetical protein LOC499120                                          | LOC499120               | 1.18±0.13  |
| hypothetical protein LOC499339                                          | LOC499339               | 1.05±0.17  |
| hypothetical protein LOC499602                                          | LOC499602               | 0.31±0.09  |
| hypothetical protein LOC500251                                          | LOC500251               | 0.6±0.16   |
| hypothetical protein LOC501546                                          | LOC501546               | 3.07±0.17  |
| hypothetical protein LOC502374                                          | LOC502374               | 11.79±0.44 |
| hypothetical protein LOC595134                                          | LOC595134               | 1.89±0.08  |
| hypothetical protein LOC606294                                          | LOC606294               | 4.83±0.29  |
| Hypothetical protein LOC619558                                          | LOC619558               | 0.51±0.16  |
| hypothetical protein LOC619574                                          | LOC619574               | 0.74±0.13  |
| Hypothetical protein LOC679802                                          | LOC679802               | 0.25±0.04  |
| hypothetical protein LOC679880                                          | LOC679880               | 5.66±0.6   |
| hypothetical protein LOC680039                                          | LOC680039               | 1.97±0.19  |
| Hypothetical protein LOC680080                                          | LOC680080               | 4.81±0.27  |
| hypothetical protein LOC680262                                          | LOC680262               | 0.32±0.1   |
| Hypothetical protein LOC680422                                          | LOC680422               | 0.47±0.05  |
| Hypothetical protein LOC680817                                          | LOC296884               | 1.88±0.14  |
| hypothetical protein LOC681219                                          | LOC681219               | 11.14±1.2  |
| hypothetical protein LOC681292                                          | LOC681292               | 0.27±0.08  |
| hypothetical protein LOC681367                                          | LOC681367               | 3.13±0.06  |
| hypothetical protein LOC682679                                          | LOC682679               | 2.29±0.56  |
| hypothetical protein LOC682709                                          | LOC682709               | 3.84±0.4   |
| hypothetical protein LOC682874                                          | LOC682874               | 1.51±0.18  |
| hypothetical protein LOC682888                                          | LOC682888               | 4.6±0.64   |
| hypothetical protein LOC683034                                          | LOC683034               | 1.47±0.05  |
| Hypothetical protein LOC683140                                          | Ak1                     | 1.12±0.34  |
| hypothetical protein LOC683948                                          | LOC683948               | 0.41±0.09  |
| hypothetical protein LOC684830                                          | LOC684830               | 0.77±0.22  |
| hypothetical protein LOC684993                                          | LOC684993               | 1.44±0.24  |
| hypothetical protein LOC685203                                          | LOC685203               | 7.8±1.43   |
| hypothetical protein LOC685233 /// hypothetical protein LOC688211       | LOC685233 /// LOC688211 | 0.34±0.11  |
| hypothetical protein LOC685545                                          | LOC685545               | 12.06±1.28 |
| hypothetical protein LOC685548                                          | LOC685548               | 12.67±1.09 |
| hypothetical protein LOC685634                                          | LOC685634               | 1.04±0.24  |
| hypothetical protein LOC685888                                          | LOC685888               | 3.12±0.21  |
| hypothetical protein LOC686032                                          | LOC686032               | 6.81±0.5   |
| hypothetical protein LOC686120                                          | LOC686120               | 2.55±0.78  |
| hypothetical protein LOC686179                                          | MGC125239               | 1.91±0.23  |
| hypothetical protein LOC686796                                          | LOC686796               | 0.41±0.12  |
| hypothetical protein LOC687090                                          | LOC687090               | 6.26±0.17  |
| hypothetical protein LOC687361                                          | LOC687361               | 0.85±0.11  |
| hypothetical protein LOC687693                                          | LOC687693               | 1.88±0.15  |
| hypothetical protein LOC688211                                          | LOC688211               | 0.91±0.21  |
| hypothetical protein LOC688300                                          | LOC688300               | 2.59±0.3   |
| Hypothetical protein LOC688495                                          | LOC688495               | 5.25±0.54  |
| hypothetical protein LOC689147                                          | LOC689147               | 7.88±0.74  |
| Hypothetical protein LOC689165                                          | LOC689165               | 0.51±0.02  |
| hypothetical protein LOC689399                                          | LOC689399               | 0.31±0.05  |
| hypothetical protein LOC689574                                          | LOC689574               | 8.46±1.75  |
| hypothetical protein LOC689959                                          | LOC689959               | 0.73±0.09  |
| hypothetical protein LOC690243                                          | LOC690243               | 1.27±0.27  |
| hypothetical protein LOC690274                                          | LOC690274               | 0.6±0.1    |
| hypothetical protein LOC690349                                          | LOC690349               | 1.76±0.17  |
| hypothetical protein LOC690422                                          | LOC690422               | 0.37±0.05  |
| hypothetical protein LOC691543                                          | LOC691543               | 0.83±0.02  |
| hypothetical protein LOC691750                                          | LOC691750               | 1.85±0.22  |
| hypothetical protein LOC691807                                          | rCG_28701               | 16.08±0.7  |
| hypothetical protein LOC691849                                          | LOC691849               | 2.36±0.12  |
| hypothetical protein LOC692032                                          | LOC692032               | 0.61±0.22  |
| hypothetical protein MGC:15854                                          | RGD1302996              | 2.95±0.69  |
| hypothetical protein MGC:72616                                          | RGD735175               | 0.97±0.3   |
| hypothetical RNA binding protein RGD1359713                             | RGD1359713              | 9.8±1.28   |
| hypoxanthine guanine phosphoribosyl transferase 1                       | Hprt1                   | 11.57±0.75 |
| hypoxia inducible factor 1, alpha subunit                               | Hif1a                   | 7.61±0.13  |
| hypoxia up-regulated 1                                                  | Hyou1                   | 1.18±0.24  |
| IAP promoted placental gene (predicted)                                 | lpp_predicted           | 2.88±0.22  |
| iduronate 2-sulfatase                                                   | lds                     | 5.41±0.28  |
| IK cytokine /// WD repeat domain 55                                     | Ik /// Wdr55            | 0.95±0.41  |
| IKAROS family zinc finger 5                                             | Ikzf5                   | 0.33±0.05  |
| ilvB (bacterial acetolactate synthase)-like (predicted)                 | ilvb_predicted          | 2±0.24     |
| immature colon carcinoma transcript 1 (predicted)                       | lct1_predicted          | 4.59±0.53  |
| immediate early response 5-like                                         | ler5l                   | 0.23±0.23  |
| immunoglobulin (CD79A) binding protein 1                                | Igbbp1                  | 3.24±0.53  |
| immunoglobulin superfamily, member 11                                   | Igsf11                  | 24.72±2.36 |
| immunoglobulin superfamily, member 3 (predicted)                        | Igsf3_predicted         | 0.2±0.11   |
| IMP3, U3 small nucleolar ribonucleoprotein, homolog (yeast) (predicted) | Imp3_predicted          | 1.64±0.03  |
| IMP4, U3 small nucleolar ribonucleoprotein, homolog (yeast)             | Imp4                    | 6.53±0.53  |
| importin 11 (predicted)                                                 | Ipo11_predicted         | 1.62±0.25  |
| importin 13                                                             | Ipo13                   | 0.8±0.23   |
| importin 4 (predicted)                                                  | Ipo4_predicted          | 2.52±0.22  |

|                                                                                             |                    |            |
|---------------------------------------------------------------------------------------------|--------------------|------------|
| importin 7 (predicted)                                                                      | lpo7_predicted     | 7.46±0.93  |
| Importin 9 (predicted)                                                                      | lpo9_predicted     | 2.83±0.33  |
| imprinted and ancient                                                                       | lmpact             | 1.12±0.11  |
| Indian hedgehog homolog, (Drosophila)                                                       | lhh                | 0.74±0.04  |
| indolethylamine N-methyltransferase                                                         | lnmt               | 1.22±1.21  |
| influenza virus NS1A binding protein (predicted)                                            | lvns1abp_predicted | 16.44±1.4  |
| ing finger protein 5 pseudogene                                                             | rCG_38334          | 4.61±0.46  |
| inhibitor of Bruton agammaglobulinemia tyrosine kinase (predicted)                          | lbtik_predicted    | 1.56±0.25  |
| inhibitor of DNA binding 2                                                                  | ld2                | 5.46±0.12  |
| inhibitor of DNA binding 4                                                                  | ld4                | 8.18±1.78  |
| inhibitor of growth family, member 1                                                        | lng1               | 0.63±0.19  |
| inhibitor of growth family, member 2                                                        | lng2               | 1.2±0.08   |
| inhibitor of growth family, member 4                                                        | lng4               | 1.14±0.08  |
| inhibitor of kappa light polypeptide enhancer in B-cells, kinase complex-associated protein | lkbkap             | 0.98±0.08  |
| inhibitor of kappaB kinase beta                                                             | lkbkb              | 1.18±0.12  |
| inner membrane protein, mitochondrial                                                       | lmmt               | 23.17±1.93 |
| INO80 complex homolog 1 (S. cerevisiae)                                                     | lnoc1              | 0.56±0.18  |
| inosine 5'-phosphate dehydrogenase 2                                                        | lmpdh2             | 1.47±0.24  |
| inosine triphosphatase (nucleoside triphosphate pyrophosphatase)                            | ltpa               | 3.28±0.35  |
| Inositol (myo)-1(or 4)-monophosphatase 1                                                    | lmpa1              | 4.28±0.32  |
| inositol (myo)-1(or 4)-monophosphatase 2                                                    | lmpa2              | 0.76±0.15  |
| inositol 1,4,5-triphosphate receptor 1                                                      | ltpr1              | 8.63±0.9   |
| inositol hexaphosphate kinase 1                                                             | lhpk1              | 4.75±0.6   |
| inositol hexaphosphate kinase 2                                                             | lhpk2              | 1.09±0.23  |
| inositol monophosphatase domain containing 1                                                | lmpad1             | 1.26±0.12  |
| inositol polyphosphate multikinase                                                          | lpmk               | 4.42±0.48  |
| inositol polyphosphate phosphatase-like 1                                                   | lnpp1              | 0.56±0.38  |
| inositol polyphosphate-1-phosphatase                                                        | lnpp1              | 1.66±0.38  |
| inositol polyphosphate-4-phosphatase, type 1                                                | lnpp4a             | 0.83±0.14  |
| inositol polyphosphate-5-phosphatase B                                                      | lnpp5b             | 6.46±0.49  |
| insulin degrading enzyme                                                                    | lde                | 1.59±0.4   |
| insulin induced gene 1                                                                      | linsig1            | 4.39±0.61  |
| insulin induced gene 2                                                                      | linsig2            | 1.91±0.11  |
| insulin receptor substrate 2                                                                | lrs2               | 0.55±0.05  |
| insulin-like growth factor 1 receptor                                                       | lqf1r              | 2.35±0.84  |
| insulin-like growth factor 2 receptor                                                       | lqf2r              | 43.42±1.73 |
| insulin-like growth factor binding protein 2                                                | lgfbp2             | 0.72±0.3   |
| insulin-like growth factor binding protein 4                                                | lgfbp4             | 1.96±0.14  |
| insulin-like growth factor binding protein 5                                                | lgfbp5             | 11.8±1.87  |
| insulin-like growth factor binding protein 7                                                | lgfbp7             | 44.87±1.7  |
| insulin-like growth factor binding protein, acid labile subunit                             | lqfals             | 2.54±0.45  |
| integral membrane protein 2B                                                                | ltm2b              | 37.61±1.47 |
| integral membrane transport protein UST5r                                                   | Ust5r              | 1.29±0.53  |
| integrator complex subunit 10                                                               | lnts10             | 0.65±0.2   |
| integrator complex subunit 4                                                                | lnts4              | 2.31±0.08  |
| integrator complex subunit 5 (predicted)                                                    | lnts5_predicted    | 0.61±0.17  |
| integrator complex subunit 6                                                                | lnts6              | 1.94±0.48  |
| integrator complex subunit 7                                                                | lnts7              | 0.35±0.15  |
| integrator complex subunit 9                                                                | lnts9              | 1.14±0.19  |
| integrin alpha 1                                                                            | ltga1              | 4.97±2.21  |
| integrin alpha 7                                                                            | ltga7              | 0.57±0.12  |
| integrin alpha FG-GAP repeat containing 1                                                   | ltfg1              | 7.85±0.49  |
| integrin alpha FG-GAP repeat containing 2                                                   | ltfg2              | 0.55±0.12  |
| integrin alpha FG-GAP repeat containing 3                                                   | ltfg3              | 3.08±0.49  |
| integrin alpha V (predicted)                                                                | ltgav_predicted    | 0.46±0.08  |
| integrin beta 1 (fibronectin receptor beta)                                                 | ltgb1              | 4.51±0.2   |
| integrin beta 1 binding protein 1 (predicted)                                               | ltqb1bp1_predicted | 4.36±0.52  |
| integrin beta 3 binding protein (beta3-endonexin)                                           | ltgb3bp            | 0.76±0.33  |
| integrin linked kinase                                                                      | lik                | 5.84±0.5   |
| Integrin, alpha 6                                                                           | ltga6              | 3.06±0.25  |
| integrin, alpha E, epithelial-associated                                                    | ltgae              | 0.34±0.23  |
| integrin, beta 5                                                                            | ltgb5              | 1.77±0.34  |
| integrin, beta 6                                                                            | ltgb6              | 5.53±0.63  |
| integrin-linked kinase-associated serine/threonine phosphatase 2C                           | likap              | 1.36±0.09  |
| interferon (alpha and beta) receptor 1 (predicted)                                          | lfnar1_predicted   | 0.66±0.2   |
| interferon gamma induced GTPase                                                             | lqto               | 2.36±0.04  |
| interferon gamma inducible protein 30                                                       | lfi30              | 15.4±1.86  |
| interferon gamma receptor 1                                                                 | lfngr1             | 0.51±0.23  |
| interferon gamma receptor 2 (predicted)                                                     | lfngr2_predicted   | 0.59±0.24  |
| interferon induced transmembrane protein 2                                                  | lfitm2             | 6.65±1.29  |
| interferon regulatory factor 2 binding protein 1 (predicted)                                | lrf2bp1_predicted  | 0.79±0.28  |
| interferon regulatory factor 6 (predicted)                                                  | lrf6_predicted     | 0.98±0.3   |
| interferon stimulated exonuclease gene 20-like 1 (predicted)                                | lsg20l1_predicted  | 0.55±0.12  |
| interferon-induced protein 35                                                               | lfi35              | 1.1±0.58   |
| interferon-related developmental regulator 1                                                | lfrd1              | 3.75±0.91  |
| interferon-related developmental regulator 2 (predicted)                                    | lfrd2_predicted    | 1.54±0.27  |
| interleukin 1 receptor accessory protein                                                    | li1rap             | 0.44±0.08  |
| interleukin 10 receptor, beta                                                               | li10rb             | 3.09±0.19  |
| interleukin 13 receptor, alpha 1                                                            | li13ra1            | 1.26±0.07  |
| interleukin 15                                                                              | li15               | 0.51±0.3   |
| interleukin 17 receptor A                                                                   | li17ra             | 0.88±0.23  |
| interleukin 33                                                                              | li33               | 4.42±0.3   |
| interleukin 4 receptor, alpha                                                               | li4ra              | 1.04±0.17  |
| interleukin 6 signal transducer                                                             | li6st              | 1.08±0.38  |
| interleukin enhancer binding factor 2                                                       | liif2              | 3.08±0.03  |
| interleukin enhancer binding factor 3                                                       | liif3              | 0.25±0.1   |
| interleukin-1 receptor-associated kinase 1 (predicted)                                      | lirak1_predicted   | 4.92±0.24  |

|                                                                                       |                    |            |
|---------------------------------------------------------------------------------------|--------------------|------------|
| interleukin-1 receptor-associated kinase 1 binding protein 1 (predicted)              | Irak1bp1_predicted | 2.86±0.16  |
| interleukin-1 receptor-associated kinase 2                                            | Irak2              | 1.93±0.34  |
| intersectin 1                                                                         | Itns1              | 0.39±0.1   |
| intersectin 2                                                                         | Itns2              | 2.67±0.51  |
| intraflagellar transport 172 homolog (Chlamydomonas)                                  | Ift172             | 1.22±0.15  |
| intraflagellar transport 20 homolog (Chlamydomonas)                                   | Ift20              | 2.63±0.49  |
| intraflagellar transport 57 homolog (Chlamydomonas) (predicted)                       | Ift57_predicted    | 0.92±0.14  |
| intraflagellar transport 80 homolog (Chlamydomonas)                                   | Ift80              | 0.43±0.05  |
| intraflagellar transport 81 homolog (Chlamydomonas)                                   | Ift81              | 0.74±0.11  |
| intraflagellar transport 88 homolog (Chlamydomonas) (predicted)                       | Ift88_predicted    | 0.66±0.06  |
| invasion inhibitory protein 45                                                        | lip45              | 0.48±0.15  |
| inversin                                                                              | Invs               | 0.46±0.14  |
| iodotyrosine deiodinase                                                               | lyd                | 7.43±0.54  |
| Ion transporter protein                                                               | Nritp              | 8.16±0.83  |
| IQ motif and ubiquitin domain containing                                              | Iqub               | 1.07±0.12  |
| IQ motif and WD repeats 1                                                             | Iqwd1              | 0.59±0.1   |
| Iron responsive element binding protein 2                                             | Ireb2              | 2.41±0.09  |
| iron-sulfur cluster assembly 1 homolog (S. cerevisiae)                                | IscA1              | 7.19±0.84  |
| ischemia related factor NYW-1                                                         | Nyw1               | 0.6±0.07   |
| IscU iron-sulfur cluster scaffold homolog (E. coli)                                   | Iscu               | 19.07±1.48 |
| isoamyl acetate-hydrolyzing esterase 1 homolog (S. cerevisiae)                        | Iah1               | 22.79±2.01 |
| isochorismatase domain containing 1                                                   | IsoC1              | 7.91±0.28  |
| isochorismatase domain containing 2b                                                  | IsoC2b             | 1.87±0.49  |
| isocitrate dehydrogenase 1 (NADP+), soluble                                           | Idh1               | 51.17±3.83 |
| isocitrate dehydrogenase 2 (NADP+), mitochondrial                                     | Idh2               | 45.47±2.36 |
| isocitrate dehydrogenase 3 (NAD), gamma                                               | Idh3g              | 33.16±2.43 |
| isocitrate dehydrogenase 3 (NAD+) alpha                                               | Idh3a              | 9.01±1.1   |
| isocitrate dehydrogenase 3 (NAD+) beta                                                | Idh3B              | 20.71±1.62 |
| isoleucine-tRNA synthetase (predicted)                                                | Iars_predicted     | 1.64±0.28  |
| isoleucine-tRNA synthetase 2, mitochondrial (predicted)                               | Iars2_predicted    | 2.23±0.14  |
| isopentenyl-diphosphate delta isomerase                                               | Iid1               | 6.29±0.57  |
| isoprenylcysteine carboxyl methyltransferase                                          | Icmt               | 0.99±0.15  |
| isovaleryl coenzyme A dehydrogenase                                                   | Ivd                | 9.38±0.94  |
| ISY1 splicing factor homolog (S. cerevisiae)                                          | Ily1               | 0.84±0.18  |
| IWS1 homolog (S. cerevisiae)                                                          | Iws1               | 2.17±0.18  |
| jagunal homolog 1 (Drosophila)                                                        | Jagn1              | 2.76±0.56  |
| Janus kinase 1                                                                        | Jak1               | 3.01±0.42  |
| Janus kinase 2                                                                        | Jak2               | 0.9±0.15   |
| Josephin domain containing 1                                                          | Josd1              | 1.01±0.37  |
| Josephin domain containing 2 (predicted)                                              | Josd2_predicted    | 0.7±0.16   |
| Josephin domain containing 3                                                          | Josd3              | 0.7±0.04   |
| JTV1 gene                                                                             | Jtv1               | 1.47±0.05  |
| jumonji domain containing 1A                                                          | Jmjd1a             | 1.31±0.11  |
| jumonji domain containing 1C                                                          | Jmjd1c             | 1.47±0.48  |
| jumonji domain containing 5                                                           | Jmjd5              | 0.93±0.11  |
| jumonji domain containing 6                                                           | Jmjd6              | 0.9±0.13   |
| jumonji, AT rich interactive domain 1B (Rbp2 like)                                    | Jarid1b            | 1.19±0.26  |
| jumping translocation breakpoint                                                      | Jtb                | 2.96±0.36  |
| Jun D proto-oncogene                                                                  | Jund               | 6.17±2.49  |
| Jun oncogene                                                                          | Jun                | 2.81±1.94  |
| Junction adhesion molecule 2                                                          | Jam2               | 0.4±0.15   |
| junction plakoglobin                                                                  | Jup                | 1.26±0.36  |
| junctional adhesion molecule 3                                                        | Jam3               | 0.38±0.17  |
| kalirin, RhoGEF kinase                                                                | Kalrn              | 0.77±0.1   |
| kaptin                                                                                | Kptn               | 1.2±0.35   |
| Karyopherin (importin) alpha 1                                                        | Kpna1              | 3.14±0.32  |
| karyopherin (importin) alpha 2                                                        | Kpna2              | 4.4±0.58   |
| Karyopherin (importin) alpha 3                                                        | Kpna3              | 1.79±0.08  |
| karyopherin (importin) alpha 6                                                        | Kpna6              | 0.47±0.08  |
| karyopherin (importin) beta 1                                                         | Kpnb1              | 0.39±0.21  |
| katanin p60 (ATPase-containing) subunit A1                                            | Katna1             | 0.61±0.23  |
| KDEL (Lys-Asp-Glu-Leu) containing 1                                                   | KdelC1             | 0.76±0.05  |
| KDEL (Lys-Asp-Glu-Leu) endoplasmic reticulum protein retention receptor 1             | Kdelr1             | 8.52±0.4   |
| KDEL (Lys-Asp-Glu-Leu) endoplasmic reticulum protein retention receptor 2             | Kdelr2             | 5.54±0.4   |
| KDEL (Lys-Asp-Glu-Leu) endoplasmic reticulum protein retention receptor 3 (predicted) | Kdelr3_predicted   | 7.88±0.9   |
| kelch domain containing 1 (predicted)                                                 | KlhdC1_predicted   | 0.39±0.1   |
| kelch domain containing 2                                                             | KlhdC2             | 4.27±0.46  |
| kelch domain containing 3                                                             | KlhdC3             | 1.66±0.98  |
| kelch domain containing 5                                                             | KlhdC5             | 0.7±0.13   |
| kelch repeat and BTB (POZ) domain containing 2 (predicted)                            | Kbtbd2_predicted   | 1.98±0.41  |
| kelch repeat and BTB (POZ) domain containing 3 (predicted)                            | Kbtbd3_predicted   | 0.48±0.15  |
| kelch repeat and BTB (POZ) domain containing 4 (predicted)                            | Kbtbd4_predicted   | 1.01±0.19  |
| kelch-like 14 (Drosophila)                                                            | Klhl14             | 0.74±0.06  |
| kelch-like 2, Mayven (Drosophila) (predicted)                                         | Klhl2_predicted    | 0.52±0.09  |
| kelch-like 22 (Drosophila) (predicted)                                                | Klhl22_predicted   | 3.84±0.26  |
| kelch-like 23 (Drosophila) (predicted)                                                | Klhl23_predicted   | 1.49±0.31  |
| kelch-like 24 (Drosophila)                                                            | Klhl24             | 6.72±0.51  |
| kelch-like 25 (Drosophila)                                                            | Klhl25             | 3.7±0.08   |
| kelch-like 26 (Drosophila) (predicted)                                                | Klhl26_predicted   | 0.26±0.03  |
| kelch-like 7 (Drosophila)                                                             | Klhl7              | 1.49±0.58  |
| kelch-like 8 (Drosophila) (predicted)                                                 | Klhl8_predicted    | 0.9±0.03   |
| kelch-like 9 (Drosophila) (predicted)                                                 | Klhl9_predicted    | 5.45±0.43  |
| Kelch-like ECH-associated protein 1                                                   | Keap1              | 0.89±0.32  |
| keratin 10                                                                            | Krt10              | 0.51±0.06  |
| keratin 7                                                                             | Krt7               | 9.11±1.51  |
| keratin 8                                                                             | Krt8               | 10.06±1.69 |
| keratinocyte associated protein 2 (predicted)                                         | Krtcap2_predicted  | 5.8±0.65   |



|                                                                                   |                          |            |
|-----------------------------------------------------------------------------------|--------------------------|------------|
| ketoheokinase                                                                     | Khk                      | 18.78±2.53 |
| KH domain containing, RNA binding, signal transduction associated 1               | Khdrbs1                  | 4.47±0.2   |
| KH domain containing, RNA binding, signal transduction associated 3               | Khdrbs3                  | 0.29±0.04  |
| KH-type splicing regulatory protein                                               | Khsrp                    | 0.49±0.95  |
| kidney androgen regulated protein                                                 | Kap                      | 35.17±5.66 |
| kidney expressed gene 1                                                           | Keg1                     | 2.09±0.42  |
| kidney predominant protein NCU-G1                                                 | RGD1303130               | 30.1±1.91  |
| kinase D-interacting substrate of 220 kDa                                         | Kidins220                | 5.26±0.94  |
| kinectin 1 (predicted)                                                            | Ktn1_predicted           | 2.65±0.54  |
| kinesin family member 11                                                          | Kif11                    | 5.97±0.44  |
| kinesin family member 12                                                          | Kif12                    | 7.58±0.87  |
| kinesin family member 13A (predicted)                                             | Kif13a_predicted         | 0.95±0.08  |
| kinesin family member 16B (predicted)                                             | Kif16b_predicted         | 1.84±0.15  |
| kinesin family member 21A (predicted)                                             | Kif21a_predicted         | 3.61±0.27  |
| kinesin family member 22                                                          | Kif22                    | 0.33±0.04  |
| kinesin family member 2A                                                          | Kif2a                    | 1.22±0.23  |
| kinesin family member 3a                                                          | Kif3a                    | 0.46±0.07  |
| kinesin family member 3B (predicted)                                              | Kif3b_predicted          | 2.09±0.08  |
| kinesin family member 5B                                                          | Kif5b                    | 0.57±0.2   |
| kinesin family member C1                                                          | Kifc1                    | 1.05±0.09  |
| kinesin family member C2                                                          | KIFC2                    | 4.11±0.5   |
| kinesin family member C3                                                          | Kifc3                    | 0.92±0.13  |
| Kinesin heavy chain family, member 2                                              | Kif2                     | 0.33±0.09  |
| kinesin light chain 1                                                             | Klc1                     | 1.3±0.14   |
| kinesin light chain 2 (predicted)                                                 | Klc2_predicted           | 1.52±0.34  |
| kinesin light chain 4                                                             | Klc4                     | 6.6±0.1    |
| kinesin-associated protein 3 (predicted)                                          | Kifap3_predicted         | 2.64±0.34  |
| KISS-1 metastasis-suppressor /// golgi transport 1 homolog A (S. cerevisiae)      | Golt1a /// Kiss1         | 2.04±0.29  |
| Klotho                                                                            | Kl                       | 1.46±0.27  |
| KRAB-A domain containing 1                                                        | Krba1                    | 0.44±0.1   |
| KRIT1, ankyrin repeat containing (predicted)                                      | Krit1_predicted          | 0.91±0.19  |
| Kruppel-like factor 13                                                            | Klf13                    | 0.24±0.16  |
| Kruppel-like factor 15                                                            | Klf15                    | 4.53±0.52  |
| Kruppel-like factor 3 (basic)                                                     | Klf3                     | 1.48±0.22  |
| Kruppel-like factor 6                                                             | Klf6                     | 0.75±0.11  |
| Kruppel-like factor 9                                                             | Klf9                     | 13.84±0.79 |
| KTEL (Lys-Tyr-Glu-Leu) containing 1                                               | Ktelc1                   | 1.15±0.18  |
| KTI12 homolog, chromatin associated (S. cerevisiae)                               | Kti12                    | 2.07±0.19  |
| kynureninase (L-kynurenine hydrolase)                                             | Kynu                     | 10.65±0.65 |
| kynurenine 3-monooxygenase (kynurenine 3-hydroxylase)                             | Kmo                      | 10.18±0.83 |
| kynurenine aminotransferase III                                                   | Kat3                     | 1.89±0.34  |
| L antigen family, member 3                                                        | Lage3                    | 8.12±0.64  |
| l(3)mbt-like 2 (Drosophila)                                                       | L3mbtl2                  | 0.76±0.15  |
| l(3)mbt-like 3 (Drosophila) (predicted)                                           | L3mbtl3_predicted        | 0.57±0.15  |
| L-2-hydroxyglutarate dehydrogenase (predicted)                                    | L2hgdh_predicted         | 1.28±0.13  |
| La ribonucleoprotein domain family, member 1 (predicted)                          | Larp1_predicted          | 3.88±2.98  |
| La ribonucleoprotein domain family, member 5 (predicted)                          | Larp5_predicted          | 4.51±1.59  |
| lactamase, beta (predicted)                                                       | Lactb_predicted          | 2.51±0.16  |
| Lactamase, beta 2                                                                 | Lactb2                   | 20.59±1.33 |
| lactate dehydrogenase A                                                           | Ldha                     | 5.11±1.26  |
| lactate dehydrogenase B                                                           | Ldhb                     | 53.64±1.76 |
| lactate dehydrogenase D                                                           | Ldhd                     | 5.02±0.78  |
| lactation elevated 1                                                              | Lace1                    | 5.74±0.51  |
| ladinin (predicted)                                                               | Lad1_predicted           | 0.95±0.1   |
| LAG1 homolog, ceramide synthase 1 /// growth differentiation factor 1 (predicted) | Gdf1_predicted /// Lass1 | 1.9±0.03   |
| lamin A                                                                           | Lmna                     | 1.82±0.4   |
| lamin B receptor                                                                  | Lbr                      | 0.83±0.13  |
| laminin, alpha 1                                                                  | Lama1                    | 2.07±0.32  |
| laminin, alpha 3                                                                  | Lama3                    | 0.65±0.18  |
| laminin, alpha 5                                                                  | Lama5                    | 0.33±0.24  |
| laminin, beta 1                                                                   | Lamb1                    | 4.49±0.43  |
| lanC (bacterial lantibiotic synthetase component C)-like 1                        | Lanc1                    | 2.44±0.53  |
| LanC (bacterial lantibiotic synthetase component C)-like 2 (predicted)            | Lanc2_predicted          | 1.44±0.04  |
| Lanosterol synthase                                                               | Lss                      | 1.07±0.26  |
| large subunit GTPase 1 homolog (S. cerevisiae)                                    | Lsg1                     | 0.35±0.07  |
| large subunit ribosomal protein L36a                                              | LOC685642 /// LOC687717  | 12.34±0.23 |
|                                                                                   | /// LOC691991 ///        |            |
|                                                                                   | RGD1566235_predicted /// |            |
|                                                                                   | Rpl36a ///               |            |
|                                                                                   | Rpl36a_predicted         |            |
| large subunit ribosomal protein L36a                                              | LOC687717 /// LOC691991  | 9.27±1.69  |
|                                                                                   | /// RGD1566235_predicted |            |
|                                                                                   | /// Rpl36a ///           |            |
|                                                                                   | Rpl36a_predicted         |            |
| LAS1-like (S. cerevisiae) (predicted)                                             | Las11_predicted          | 0.74±0.12  |
| latent transforming growth factor beta binding protein 4                          | Ltbp4                    | 0.54±0.1   |
| latrophilin 1                                                                     | Lphn1                    | 2.83±0.63  |
| latrophilin 2                                                                     | Lphn2                    | 1±0.25     |
| LEA_4 domain containing protein RGD1359600                                        | RGD1359600               | 3.48±0.27  |
| lectin, galactose binding, soluble 8                                              | Lgals8                   | 9.93±0.09  |
| lectin, galactoside-binding, soluble 2                                            | Lgals2                   | 1.65±0.1   |
| lectin, mannose-binding 2 (predicted)                                             | Lman2_predicted          | 13.18±1.53 |
| Lectin, mannose-binding 2-like (predicted)                                        | Lman2l_predicted         | 1.98±0.33  |
| lectin, mannose-binding, 1                                                        | Lman1                    | 0.28±0.25  |
| legumain                                                                          | Lgmn                     | 65.54±3.06 |

|                                                                         |                      |            |
|-------------------------------------------------------------------------|----------------------|------------|
| LEM domain containing 2                                                 | Lemd2                | 0.54±0.15  |
| LEM domain containing 3                                                 | Lemd3                | 0.45±0.21  |
| Leo1, Paf1/RNA polymerase II complex component, homolog (S. cerevisiae) | Leo1                 | 0.48±0.12  |
| leprecan 1                                                              | Lepre1               | 0.79±0.15  |
| leptin receptor overlapping transcript                                  | Leprot               | 1.57±0.3   |
| leptin receptor overlapping transcript-like 1                           | Leprotl1             | 2.74±0.7   |
| leucine aminopeptidase 3                                                | Lap3                 | 5.59±0.58  |
| leucine carboxyl methyltransferase 1                                    | Lcmt1                | 1.11±0.42  |
| leucine rich repeat (in FLII) interacting protein 2                     | Lrrfp2               | 0.76±0.22  |
| leucine rich repeat and sterile alpha motif containing 1                | Lrsam1               | 0.35±0.14  |
| leucine rich repeat containing 14                                       | Lrrc14               | 0.9±0.2    |
| leucine rich repeat containing 16                                       | Lrrc16               | 2.05±0.21  |
| leucine rich repeat containing 19                                       | Lrrc19               | 32.26±0.78 |
| leucine rich repeat containing 20                                       | Lrrc20               | 0.25±0.05  |
| leucine rich repeat containing 27                                       | Lrrc27               | 0.73±0.07  |
| leucine rich repeat containing 28 (predicted)                           | Lrrc28_predicted     | 0.68±0.11  |
| leucine rich repeat containing 40                                       | Lrrc40               | 1.44±0.35  |
| leucine rich repeat containing 41                                       | Lrrc41               | 1.46±0.16  |
| leucine rich repeat containing 42                                       | Lrrc42               | 1.12±0.18  |
| leucine rich repeat containing 48                                       | Lrrc48               | 0.36±0.03  |
| leucine rich repeat containing 57                                       | Lrrc57               | 0.74±0.01  |
| leucine rich repeat containing 59                                       | Lrrc59               | 5.94±0.51  |
| leucine rich repeat containing 61                                       | Lrrc61               | 0.44±0.09  |
| leucine rich repeat containing 8 family, member B                       | Lrrc8b               | 5.89±0.19  |
| leucine rich repeat containing 8 family, member E                       | Lrrc8e               | 0.28±0.07  |
| leucine rich repeat containing 8D                                       | Lrrc8d               | 11.22±1.69 |
| leucine zipper and CTNBP1 domain containing                             | Lzic                 | 0.4±0.07   |
| leucine zipper protein 1                                                | Luzp1                | 0.23±0.18  |
| leucine zipper transcription factor-like 1                              | Lztlf1               | 11.51±0.83 |
| leucine zipper-EF-hand containing transmembrane protein 1               | Letm1                | 3.43±0.88  |
| leucine-rich PPR-motif containing                                       | Lrpprc               | 10.54±0.36 |
| leucine-rich repeat-containing G protein-coupled receptor 4             | Lgr4                 | 1.49±0.44  |
| leucine-rich repeats and immunoglobulin-like domains 3                  | Lrig3                | 0.62±0.17  |
| leucine-zipper-like transcriptional regulator, 1 (predicted)            | Lztr1_predicted      | 1.89±0.1   |
| leucyl-tRNA synthetase                                                  | Lars                 | 2.9±0.54   |
| leukocyte cell-derived chemotaxin 2 (predicted)                         | Lect2_predicted      | 0.29±0.03  |
| leukocyte receptor cluster (LRC) member 1 (predicted)                   | Leng1_predicted      | 0.2±0.05   |
| leukocyte receptor cluster (LRC) member 4 (predicted)                   | Leng4_predicted      | 2.75±0.11  |
| leukotriene A4 hydrolase                                                | Lta4h                | 5.07±0.08  |
| leukotriene B4 12-hydroxydehydrogenase                                  | Ltb4dh               | 4.43±0.94  |
| ligand of numb-protein X 2 (predicted)                                  | LnX2_predicted       | 1.05±0.21  |
| ligase I, DNA, ATP-dependent                                            | Lig1                 | 0.4±0.11   |
| ligase III, DNA, ATP-dependent                                          | Lig3                 | 0.44±0.14  |
| LIM and cysteine-rich domains 1 (predicted)                             | Lmcd1_predicted      | 0.61±0.06  |
| LIM and senescent cell antigen like domains 2                           | Lims2                | 7.78±0.68  |
| LIM and SH3 protein 1                                                   | Lasp1                | 9.8±1.02   |
| LIM domain binding 1 (predicted)                                        | Ldb1_predicted       | 1.14±0.09  |
| LIM domain containing preferred translocation partner in lipoma         | Lpp                  | 0.41±0.15  |
| LIM domain only 4                                                       | Lmo4                 | 14.63±1.86 |
| LIM domain only 7                                                       | Lmo7                 | 1.34±0.2   |
| LIM domain only protein 7                                               | LMO7                 | 2.65±0.87  |
| LIM domains containing 1 (predicted)                                    | Limd1_predicted      | 0.81±0.21  |
| limkain b1                                                              | Lkap                 | 0.72±0.2   |
| lin-37 homolog (C. elegans)                                             | Lin37                | 0.6±0.37   |
| lin-7 homolog C (C. elegans)                                            | Lin7c                | 0.4±0.04   |
| lipase maturation factor 1                                              | Lmf1                 | 1.07±0.07  |
| lipin 2 (predicted)                                                     | Lpin2_predicted      | 1.89±0.43  |
| lipin 3                                                                 | Lpin3                | 0.92±0.29  |
| lipic acid synthetase                                                   | Lias                 | 3.99±0.42  |
| lipolysis stimulated lipoprotein receptor                               | Lsr                  | 1.19±0.13  |
| lipoma HMGIC fusion partner-like 2 (predicted)                          | Lhfp12_predicted     | 3.05±0.23  |
| liver glycogen phosphorylase                                            | Pygl                 | 7.18±0.42  |
| LMBR1 domain containing 1                                               | Lmbrd1               | 8.08±1.59  |
| LOC360590 (predicted)                                                   | RGD1311564_predicted | 0.23±0.09  |
| LOC360807                                                               | LOC360807            | 2.84±0.41  |
| LOC361485 /// similar to chromosome 6 open reading frame 70 (predicted) | RGD1309374 ///       | 0.85±0.21  |
|                                                                         | RGD1562376_predicted |            |
| LOC361614 (predicted)                                                   | RGD1308929_predicted | 0.86±0.03  |
| LOC361719 (predicted)                                                   | RGD1308106_predicted | 0.26±0.07  |
| LOC361774 (predicted)                                                   | RGD1306116_predicted | 0.75±0.15  |
| LOC362678 (predicted)                                                   | RGD1308923_predicted | 1.31±0.09  |
| LOC362793                                                               | RGD1307315           | 0.3±0.14   |
| LOC363015 (predicted)                                                   | RGD1310444_predicted | 0.61±0.24  |
| LOC363020 (predicted)                                                   | RGD1309410_predicted | 2.38±0.51  |
| LOC500651                                                               | MGC112883            | 4.23±0.16  |
| lon peptidase 1, mitochondrial                                          | Lonp1                | 3.79±0.47  |
| lon peptidase 2, peroxisomal                                            | Lonp2                | 18.18±1.38 |
| Longevity assurance homolog 2 (S. cerevisiae)                           | Lass2                | 7.28±0.53  |
| low density lipoprotein receptor adaptor protein 1                      | Ldlrap1              | 0.24±0.05  |
| low density lipoprotein receptor-related protein 11 (predicted)         | Lrp11_predicted      | 6.87±0.06  |
| low density lipoprotein receptor-related protein 2                      | Lrp2                 | 51.16±1.49 |
| low density lipoprotein receptor-related protein 3                      | Lrp3                 | 1.23±0.09  |
| low density lipoprotein receptor-related protein 4                      | Lrp4                 | 1.26±0.14  |
| low density lipoprotein receptor-related protein 6 (predicted)          | Lrp6_predicted       | 0.48±0.12  |
| low density lipoprotein receptor-related protein associated protein 1   | Lrapap1              | 26.32±2.53 |
| low density lipoprotein-related protein 12 (predicted)                  | Lrp12_predicted      | 0.46±0.06  |
| low-density lipoprotein receptor-related protein 10                     | Lrp10                | 8.62±1.04  |

|                                                                           |                  |            |
|---------------------------------------------------------------------------|------------------|------------|
| LPS-induced TN factor                                                     | Litaf            | 6.73±1.05  |
| LPS-responsive beige-like anchor (predicted)                              | Lrba_predicted   | 1.96±0.4   |
| LRRGT00141                                                                | LOC499235        | 4.45±0.31  |
| LSM domain containing 1                                                   | Lsm1             | 9.28±0.89  |
| LSM1 homolog, U6 small nuclear RNA associated (S. cerevisiae) (predicted) | Lsm1_predicted   | 1.36±0.4   |
| LSM12 homolog (S. cerevisiae)                                             | Lsm12            | 3.71±0.82  |
| LSM14 homolog A (SCD6, S. cerevisiae) (predicted)                         | Lsm14a_predicted | 3.89±0.37  |
| LSM3 homolog, U6 small nuclear RNA associated (S. cerevisiae) (predicted) | Lsm3_predicted   | 2.45±0.44  |
| LSM4 homolog, U6 small nuclear RNA associated (S. cerevisiae) (predicted) | Lsm4_predicted   | 1.79±0.45  |
| LSM5 homolog, U6 small nuclear RNA associated (S. cerevisiae) (predicted) | Lsm5_predicted   | 2.17±0.21  |
| LSM6 homolog, U6 small nuclear RNA associated (S. cerevisiae)             | Lsm6             | 3.19±0.86  |
| LSM7 homolog, U6 small nuclear RNA associated (S. cerevisiae) (predicted) | Lsm7_predicted   | 1.24±0.06  |
| LSM8 homolog, U6 small nuclear RNA associated (S. cerevisiae) (predicted) | Lsm8_predicted   | 1.03±0.13  |
| LTV1 homolog (S. cerevisiae)                                              | Ltv1             | 1.41±0.23  |
| LUC7-like (S. cerevisiae)                                                 | Luc7l            | 1.36±0.13  |
| LUC7-like 2 (S. cerevisiae) (predicted)                                   | Luc7l2_predicted | 3.2±0.39   |
| lung-inducible neuralized-related C3HC4 RING domain protein               | Lincr            | 1.06±0.23  |
| luteinizing hormone beta                                                  | Lhb              | 0.64±0.06  |
| Ly1 antibody reactive clone                                               | Lyar             | 0.71±0.1   |
| lymphocyte antigen 6 complex, locus B                                     | Ly6b             | 1.53±0.76  |
| lymphocyte antigen 96                                                     | Ly96             | 0.49±0.14  |
| lymphotoxin B receptor                                                    | Ltbr             | 2.13±0.65  |
| LYR motif containing 1                                                    | Lymr1            | 1.29±0.24  |
| lysine-rich coiled-coil 1                                                 | Krcc1            | 5.06±0.33  |
| LysM, putative peptidoglycan-binding, domain containing 1                 | Lysmd1           | 0.46±0.06  |
| LysM, putative peptidoglycan-binding, domain containing 3                 | Lysmd3           | 1.2±0.02   |
| lysophospholipase 1                                                       | Lypla1           | 29.39±1.32 |
| lysophospholipase 2                                                       | Lypla2           | 0.55±0.03  |
| lysophospholipase 3                                                       | Lypla3           | 3.09±0.31  |
| lysophospholipase-like 1 (predicted)                                      | Lypla1_predicted | 4.95±0.36  |
| lysosomal acid lipase A                                                   | Lipa             | 4.57±0.84  |
| lysosomal membrane glycoprotein 1                                         | Lamp1            | 47.74±3.45 |
| lysosomal membrane glycoprotein 2                                         | Lamp2            | 48.1±4.48  |
| lysosomal-associated protein transmembrane 4A                             | Laptm4a          | 26.22±1.08 |
| lysosomal-associated protein transmembrane 4B                             | Laptm4b          | 5.58±0.77  |
| lysozyme-like 6 (predicted)                                               | Lyzl6_predicted  | 0.48±0.03  |
| lysyl-tRNA synthetase                                                     | Kars             | 3.71±0.36  |
| MACRO domain containing 1                                                 | Macrod1          | 2.46±0.9   |
| macrophage erythroblast attacher                                          | Maea             | 5.57±0.48  |
| macrophage migration inhibitory factor                                    | Mif              | 23.63±4.83 |
| MAD homolog 1 (Drosophila)                                                | Smad1            | 0.57±0.27  |
| MAD homolog 2 (Drosophila)                                                | Smad2            | 0.71±0.19  |
| MAD homolog 4 (Drosophila)                                                | Smad4            | 2.73±0.17  |
| MAD homolog 5 (Drosophila)                                                | Smad5            | 0.45±0.13  |
| MAD homolog 7 (Drosophila)                                                | Smad7            | 0.23±0.06  |
| MAD2 (mitotic arrest deficient, homolog)-like 1 (yeast) (predicted)       | Mad2l1_predicted | 0.52±0.14  |
| MAD2 mitotic arrest deficient-like 2 (yeast)                              | Mad2l2           | 0.78±0.05  |
| MAD2L1 binding protein                                                    | Mad2l1bp         | 0.58±0.14  |
| maestro                                                                   | Mro              | 16.86±0.82 |
| MAF1 homolog (S. cerevisiae)                                              | Maf1             | 4.02±0.5   |
| magnesium transporter 1                                                   | Magt1            | 2.84±0.34  |
| magnesium-dependent phosphatase 1                                         | Mdp1             | 0.97±0.11  |
| mago-nashi homolog, proliferation-associated (Drosophila) (predicted)     | Magoh_predicted  | 4.73±0.57  |
| major facilitator superfamily domain containing 1 (predicted)             | Mfsd1_predicted  | 6.2±0.56   |
| major facilitator superfamily domain containing 3                         | Mfsd3            | 1.14±0.38  |
| major facilitator superfamily domain containing 9                         | Mfsd9            | 0.24±0.15  |
| major histocompatibility complex, class II, DM alpha                      | Hla-dma          | 0.75±0.38  |
| major histocompatibility complex, class II, DM beta                       | Hla-dmb          | 3.74±1.35  |
| major vault protein                                                       | Mvp              | 3.76±0.76  |
| MAK10 homolog, amino-acid N-acetyltransferase subunit, (S. cerevisiae)    | Mak10            | 2.9±0.39   |
| makorin, ring finger protein, 2                                           | Mkrm2            | 0.56±0.14  |
| malate dehydrogenase 1, NAD (soluble)                                     | Mdh1             | 51.38±0.58 |
| malate dehydrogenase 2, NAD (mitochondrial)                               | Mdh2             | 17.73±1    |
| male-enhanced antigen 1                                                   | Mea1             | 6.14±1.8   |
| male-specific lethal 2-like 1 (Drosophila) (predicted)                    | Msl2l1_predicted | 2.15±0.23  |
| male-specific lethal-3 homolog 1 (Drosophila)                             | Msl3l1           | 2.11±0.32  |
| malic enzyme 1, NADP(+)-dependent, cytosolic                              | Me1              | 1.58±0.62  |
| malic enzyme 3, NADP(+)-dependent, mitochondrial (predicted)              | Me3_predicted    | 0.29±0.06  |
| malignant T cell amplified sequence 1                                     | Mcts1            | 5.6±0.52   |
| malignant T cell amplified sequence 2                                     | Mcts2            | 2.01±0.62  |
| malonyl-CoA decarboxylase                                                 | Mlycd            | 1.25±0.05  |
| mannose phosphate isomerase (mapped)                                      | Mpi              | 3.36±0.16  |
| mannose-6-phosphate protein p76                                           | P76              | 5.95±1.05  |
| mannose-6-phosphate receptor binding protein 1                            | M6prbp1          | 3.32±1.84  |
| mannose-6-phosphate receptor, cation dependent                            | M6pr             | 16.32±2.08 |
| mannose-P-dolichol utilization defect 1                                   | Mpdu1            | 3.52±0.4   |
| mannosidase 1, alpha (predicted)                                          | Man1a_predicted  | 7.37±1.14  |
| mannosidase 2, alpha 1                                                    | Man2a1           | 1.08±0.18  |
| mannosidase 2, alpha B1                                                   | Man2b1           | 18±2.07    |
| mannosidase, alpha, class 1A, member 2 (predicted)                        | Man1a2_predicted | 0.34±0.05  |
| mannosidase, alpha, class 1B, member 1                                    | Man1b1           | 2.6±0.17   |
| mannosidase, alpha, class 2C, member 1                                    | Man2c1           | 2.65±1.13  |
| mannosidase, beta A, lysosomal                                            | Manba            | 6.75±0.72  |
| mannosidase, beta A, lysosomal-like                                       | Manbal           | 2.18±0.18  |
| mannoside acetylglucosaminyltransferase 1                                 | Mgat1            | 1.16±0.09  |
| mannoside acetylglucosaminyltransferase 2                                 | Mgat2            | 3.64±0.51  |
| mannoside acetylglucosaminyltransferase 4, isoenzyme B                    | Mgat4b           | 2.73±0.53  |

|                                                                                       |                                                       |            |
|---------------------------------------------------------------------------------------|-------------------------------------------------------|------------|
| MAP kinase-activated protein kinase 2                                                 | Mapkapk2                                              | 1.54±1.63  |
| MAP kinase-activated protein kinase 5                                                 | Mapkapk5                                              | 1.4±0.04   |
| MAP kinase-interacting serine/threonine kinase 1                                      | Mknk1                                                 | 0.48±0.1   |
| MAP kinase-interacting serine/threonine kinase 2                                      | Mknk2                                                 | 0.93±0.12  |
| MAP/microtubule affinity-regulating kinase 2                                          | Mark2                                                 | 1.52±0.53  |
| MAP/microtubule affinity-regulating kinase 3                                          | Mark3                                                 | 5.58±0.15  |
| MAP3K12 binding inhibitory protein 1 (predicted)                                      | Mbip_predicted                                        | 0.26±0.07  |
| MAP-kinase activating death domain                                                    | Madd                                                  | 0.44±0.16  |
| maternal G10 transcript                                                               | G10                                                   | 3.73±0.23  |
| matrin 3                                                                              | Matr3                                                 | 9.12±0.32  |
| matrix metalloproteinase 11                                                           | Mmp11                                                 | 1.99±0.25  |
| matrix-remodelling associated 8                                                       | Mxra8                                                 | 3.97±0.3   |
| max binding protein (predicted)                                                       | Mnt_predicted                                         | 0.66±0.17  |
| Max dimerization protein 4 (predicted)                                                | Mxd4_predicted                                        | 0.77±0.27  |
| MAX gene associated                                                                   | Mga                                                   | 0.84±0.06  |
| Max interacting protein 1                                                             | Mxi1                                                  | 5.3±0.95   |
| Max protein                                                                           | Max                                                   | 2.79±0.37  |
| MAX-like protein X                                                                    | Mlx                                                   | 4.2±0.09   |
| MCF.2 cell line derived transforming sequence-like                                    | Mcf2l                                                 | 0.28±0.05  |
| McKusick-Kaufman syndrome protein                                                     | Mkks                                                  | 4.3±1.16   |
| Meckel syndrome, type 1                                                               | Mks1                                                  | 0.44±0.17  |
| mediator complex subunit 1                                                            | Med1                                                  | 0.9±0.08   |
| mediator complex subunit 13                                                           | Med13                                                 | 0.87±0.04  |
| mediator complex subunit 13-like                                                      | Med13l                                                | 0.94±0.28  |
| mediator complex subunit 14                                                           | Med14                                                 | 1.87±0.33  |
| mediator complex subunit 15                                                           | Med15                                                 | 0.57±0.15  |
| mediator complex subunit 16                                                           | Med16                                                 | 2.22±0.5   |
| mediator complex subunit 17                                                           | Med17                                                 | 1.2±0.18   |
| mediator complex subunit 20 /// similar to ubiquitin specific protease 49 (predicted) | LOC501098 /// Med20                                   | 1.64±0.25  |
| mediator complex subunit 21                                                           | Med21                                                 | 1.51±0.32  |
| mediator complex subunit 22                                                           | Med22                                                 | 0.83±0.12  |
| mediator complex subunit 23                                                           | Med23                                                 | 1.95±0.19  |
| mediator complex subunit 24                                                           | Med24                                                 | 2.16±0.59  |
| mediator complex subunit 29                                                           | Med29                                                 | 1.48±0.41  |
| mediator complex subunit 30 (predicted)                                               | Med30_predicted                                       | 0.78±0.2   |
| mediator of cell motility 1                                                           | Memo1                                                 | 4.23±0.13  |
| mediator of DNA damage checkpoint 1                                                   | Mdc1                                                  | 0.26±0.11  |
| mediator of RNA polymerase II transcription, subunit 10 homolog (NUT2, S. cerevisiae) | Med10                                                 | 1.5±0.26   |
| mediator of RNA polymerase II transcription, subunit 11 homolog (S. cerevisiae)       | Med11                                                 | 2.03±0.14  |
| mediator of RNA polymerase II transcription, subunit 19 homolog (yeast) (predicted)   | Med19_predicted                                       | 0.52±0.07  |
| mediator of RNA polymerase II transcription, subunit 28 homolog (yeast) (predicted)   | Med28_predicted                                       | 6.86±0.34  |
| mediator of RNA polymerase II transcription, subunit 31 homolog (yeast) (predicted)   | Med31_predicted                                       | 3.5±0.5    |
| mediator of RNA polymerase II transcription, subunit 4 homolog (yeast)                | Med4                                                  | 1.29±0.4   |
| mediator of RNA polymerase II transcription, subunit 6 homolog (yeast) (predicted)    | Med6_predicted                                        | 4.02±0.18  |
| mediator of RNA polymerase II transcription, subunit 8 homolog (yeast) (predicted)    | Med8_predicted                                        | 0.7±0.09   |
| melanocyte proliferating gene 1                                                       | Myg1                                                  | 1.41±0.2   |
| melanoma antigen, family D, 1                                                         | Maged1                                                | 4.68±0.35  |
| melanoma antigen, family H, 1                                                         | Mageh1                                                | 2.54±0.58  |
| melanoma nuclear protein 13 /// similar to CG3420-PA                                  | LOC688169 /// Mel13                                   | 8.85±0.93  |
| melanophilin                                                                          | Mlph                                                  | 3.05±0.77  |
| membranin                                                                             | Mbri                                                  | 1.03±0.29  |
| membrane associated guanylate kinase, WW and PDZ domain containing 1                  | Magi1                                                 | 0.27±0.05  |
| membrane associated guanylate kinase, WW and PDZ domain containing 3                  | Magi3                                                 | 0.84±0.04  |
| membrane bound O-acyltransferase domain containing 5                                  | Mboat5                                                | 6.12±0.71  |
| membrane protein, palmitoylated 5 (MAGUK p55 subfamily member 5) (predicted)          | Mpp5_predicted                                        | 6.59±0.38  |
| membrane protein, palmitoylated 6 (MAGUK p55 subfamily member 6) (predicted)          | Mpp6_predicted                                        | 4.06±0.62  |
| Membrane-associated DHHC1 zinc finger protein                                         | LOC291967                                             | 0.24±0.09  |
| membrane-associated ring finger (C3HC4) 2                                             | March2                                                | 10.56±0.44 |
| membrane-associated ring finger (C3HC4) 3                                             | March3                                                | 0.21±0.06  |
| membrane-associated ring finger (C3HC4) 5 (predicted)                                 | March5_predicted                                      | 8.58±1.13  |
| Membrane-associated ring finger (C3HC4) 7                                             | March7                                                | 5.87±0.69  |
| membrane-associated ring finger (C3HC4) 8 (predicted)                                 | March8_predicted                                      | 3.59±0.23  |
| membrane-bound transcription factor peptidase, site 1                                 | Mbtps1                                                | 2.19±0.15  |
| menage a trois 1                                                                      | Mnat1                                                 | 0.59±0.22  |
| Meningioma expressed antigen 5 (hyaluronidase)                                        | Mgea5                                                 | 3.18±0.47  |
| mepri1 alpha                                                                          | Mep1a                                                 | 22.14±3.28 |
| mercaptopyruvate sulfurtransferase                                                    | Mpst                                                  | 20.37±3.58 |
| mesoderm development candidate 2                                                      | Mesdc2                                                | 6.5±1.3    |
| mesoderm induction early response 1 homolog (Xenopus laevis)                          | Mier1                                                 | 0.21±0.04  |
| mesoderm induction early response 1, family member 3                                  | Mier3                                                 | 1.01±0.11  |
| met proto-oncogene                                                                    | Asz1 /// Cav1 /// Cav2 /// Ctnbp2 /// Met /// ST7 /// | 1.75±0.49  |
|                                                                                       | Vnt2                                                  |            |
| metadherin                                                                            | Mtdh                                                  | 5.25±0.78  |
| metal response element binding transcription factor 1 (predicted)                     | Mtf1_predicted                                        | 1.13±0.51  |
| metal response element binding transcription factor 2                                 | Mtf2                                                  | 1.2±0.11   |
| metallophosphoesterase 1 (predicted)                                                  | Mppe1_predicted                                       | 1.2±0.16   |
| metallothionein 1a                                                                    | Mt1a                                                  | 43.13±5.43 |
| metallothionein 2A                                                                    | Mt2A                                                  | 23.85±1.01 |
| metastasis associated 1                                                               | Mta1                                                  | 0.5±0.1    |
| metastasis suppressor 1 (predicted)                                                   | Mtss1_predicted                                       | 15.88±0.64 |
| metastasis-associated gene family, member 2                                           | Mta2                                                  | 0.84±0.14  |
| metaxin 2                                                                             | Mtx2                                                  | 5.43±0.11  |
| meteorin, glial cell differentiation regulator                                        | Metrn                                                 | 0.32±0.46  |
| methionine adenosyltransferase II, alpha                                              | Mat2a                                                 | 11.4±3.98  |
| methionine aminopeptidase 2                                                           | Metap2                                                | 6.36±0.74  |
| methionine aminopeptidase-like 1 (predicted)                                          | Metap1_predicted                                      | 0.56±0.07  |

|                                                                                                                                      |                                                 |            |
|--------------------------------------------------------------------------------------------------------------------------------------|-------------------------------------------------|------------|
| methionine sulfoxide reductase A                                                                                                     | Msra                                            | 9.75±1.64  |
| methionine sulfoxide reductase B2                                                                                                    | Msrb2                                           | 3.17±0.47  |
| methionine-tRNA synthetase 2 (mitochondrial) (predicted)                                                                             | Mars2_predicted                                 | 1.52±0.28  |
| methionyl aminopeptidase 1 (predicted)                                                                                               | Metap1_predicted                                | 2.61±0.37  |
| methyl-CpG binding domain protein 1                                                                                                  | Mbd1                                            | 0.74±0.21  |
| methyl-CpG binding domain protein 2                                                                                                  | Mbd2                                            | 9.66±1.45  |
| methyl-CpG binding domain protein 3 (predicted)                                                                                      | Mbd3_predicted                                  | 3.9±0.88   |
| methyl-CpG binding domain protein 6 (predicted)                                                                                      | Mbd6_predicted                                  | 0.48±0.02  |
| methylcrotonoyl-Coenzyme A carboxylase 1 (alpha)                                                                                     | Mccc1                                           | 3.95±0.52  |
| methylcrotonoyl-Coenzyme A carboxylase 2 (beta)                                                                                      | Mccc2                                           | 14.38±0.93 |
| methylenetetrahydrofolate dehydrogenase (NADP+ dependent), methylenetetrahydrofolate cyclohydrolase, formyltetrahydrofolate synthase | Mthfd1                                          | 18.55±0.69 |
| methylmalonic aciduria (cobalamin deficiency) cblA type                                                                              | Mmaa                                            | 0.68±0.08  |
| methylmalonic aciduria (cobalamin deficiency) cblC type, with homocystinuria                                                         | Mmachc                                          | 2.95±0.39  |
| methylmalonyl CoA epimerase (predicted)                                                                                              | Mcee_predicted                                  | 5.83±0.34  |
| methylmalonyl-Coenzyme A mutase                                                                                                      | Mut                                             | 8.92±0.7   |
| methylphosphate capping enzyme                                                                                                       | Mepce                                           | 0.62±0.21  |
| Methylthioadenosine phosphorylase (predicted)                                                                                        | Mtap_predicted                                  | 0.58±0.08  |
| methyltransferase 10 domain containing                                                                                               | Mett10d                                         | 0.74±0.04  |
| methyltransferase like 10                                                                                                            | Mett10                                          | 0.82±0.1   |
| methyltransferase like 2 (predicted)                                                                                                 | Mett2_predicted                                 | 0.38±0.12  |
| methyltransferase like 5                                                                                                             | Mett5                                           | 2.56±0.66  |
| methyltransferase like 6                                                                                                             | Mett6                                           | 0.38±0.02  |
| methyltransferase like 7B                                                                                                            | Mett7b                                          | 4.61±0.76  |
| methyltransferase-like 3                                                                                                             | Mett3                                           | 1.4±0.12   |
| mevalonate kinase                                                                                                                    | Mvk                                             | 0.61±0.13  |
| microfibrillar-associated protein 3                                                                                                  | Mfap3                                           | 0.87±0.1   |
| microfibrillar-associated protein 3-like                                                                                             | Mfap3l                                          | 0.25±0.11  |
| microorchidia 2A                                                                                                                     | Morc2a                                          | 0.24±0.23  |
| microorchidia 3 (predicted)                                                                                                          | Morc3_predicted                                 | 0.58±0.26  |
| microorchidia 4                                                                                                                      | Morc4                                           | 0.86±0.07  |
| microsomal glutathione S-transferase 1                                                                                               | Mgst1                                           | 34.63±2.72 |
| microsomal glutathione S-transferase 3 (predicted)                                                                                   | Mgst3_predicted                                 | 60.1±1.87  |
| microspherule protein 1                                                                                                              | Mcrs1                                           | 2.54±0.27  |
| microtubule associated serine/threonine kinase 2 (predicted)                                                                         | Mast2_predicted                                 | 1.14±0.08  |
| microtubule associated serine/threonine kinase family member 4                                                                       | Mast4                                           | 1.07±0.13  |
| microtubule-associated protein 1 light chain 3 alpha                                                                                 | Map1lc3a                                        | 1.24±0.98  |
| microtubule-associated protein 1 light chain 3 beta                                                                                  | Map1lc3b                                        | 5.49±0.22  |
| microtubule-associated protein 7 (predicted)                                                                                         | Mtap7_predicted                                 | 11.38±0.66 |
| microtubule-associated protein tau                                                                                                   | Mapt                                            | 10.67±2.52 |
| microtubule-associated protein, RP/EB family, member 1                                                                               | Mapre1                                          | 5.16±0.45  |
| MID1 interacting protein 1 (gastrulation specific G12 homolog (zebrafish))                                                           | Mid1ip1                                         | 0.39±0.39  |
| midasin homolog (yeast)                                                                                                              | Mdn1                                            | 0.54±0.22  |
| midasin homolog (yeast) /// L YR motif containing 2                                                                                  | Lym2 /// Mdn1                                   | 4.01±0.38  |
| midkine                                                                                                                              | Mdk                                             | 3.32±0.58  |
| midnolin (predicted)                                                                                                                 | Midn_predicted                                  | 0.68±0.63  |
| MIF4G domain containing                                                                                                              | Mif4gd                                          | 1.08±0.1   |
| minichromosome maintenance deficient 2 mitotin (S. cerevisiae) (predicted)                                                           | Mcm2_predicted                                  | 0.82±0.06  |
| minichromosome maintenance deficient 3 (S. cerevisiae) associated protein (predicted)                                                | Mcm3ap_predicted                                | 0.73±0.04  |
| minichromosome maintenance deficient 4 homolog (S. cerevisiae)                                                                       | Mcm4                                            | 0.41±0.21  |
| minichromosome maintenance deficient 5, cell division cycle 46 (S. cerevisiae) (predicted)                                           | Mcm5_predicted                                  | 0.24±0.15  |
| minichromosome maintenance deficient 7 (S. cerevisiae)                                                                               | Mcm7                                            | 1.09±0.36  |
| MIS12, MIND kinetochore complex component, homolog (yeast)                                                                           | Mis12                                           | 0.29±0.04  |
| misato homolog 1 (Drosophila) (predicted)                                                                                            | Msto1_predicted                                 | 0.27±0.06  |
| MIT, microtubule interacting and transport, domain containing 1                                                                      | Mitd1                                           | 0.44±0.09  |
| mitochondrial ribosomal protein S7                                                                                                   | Mrps7                                           | 5.45±0.4   |
| Mitochondrial acyl-CoA thioesterase 1                                                                                                | Mte1                                            | 2.98±0.44  |
| mitochondrial carrier homolog 1 (C. elegans)                                                                                         | Mtch1                                           | 7.67±1.4   |
| mitochondrial carrier homolog 2 (C. elegans) (predicted)                                                                             | Mtch2_predicted                                 | 21.91±0.41 |
| mitochondrial carrier triple repeat 1                                                                                                | Mcart1                                          | 15.68±1.21 |
| Mitochondrial fission regulator 1 (predicted)                                                                                        | Mtfr1_predicted                                 | 12.94±1.61 |
| mitochondrial intermediate peptidase                                                                                                 | Mipep                                           | 8.55±0.13  |
| mitochondrial methionyl-tRNA formyltransferase                                                                                       | Mtfmt                                           | 2.41±0.06  |
| mitochondrial protein 18 kDa                                                                                                         | Mtp18                                           | 2.1±0.35   |
| mitochondrial ribosomal protein 63                                                                                                   | Mrp63                                           | 4.11±0.29  |
| mitochondrial ribosomal protein L1 (predicted)                                                                                       | Mrpl1_predicted                                 | 2.25±0.16  |
| mitochondrial ribosomal protein L10 (predicted) /// similar to mitochondrial ribosomal protein L10                                   | LOC688165 /// LOC691075<br>/// Mrpl10_predicted | 1.25±0.18  |
| mitochondrial ribosomal protein L11                                                                                                  | mrpl11                                          | 6.71±0.42  |
| mitochondrial ribosomal protein L12                                                                                                  | Mrpl12                                          | 9.16±0.98  |
| mitochondrial ribosomal protein L13                                                                                                  | Mrpl13                                          | 3.9±0.52   |
| mitochondrial ribosomal protein L14 (predicted)                                                                                      | Mrpl14_predicted                                | 2.1±0.82   |
| mitochondrial ribosomal protein L15 (predicted)                                                                                      | Mrpl15_predicted                                | 22.5±1.12  |
| mitochondrial ribosomal protein L16                                                                                                  | Mrpl16                                          | 9.22±0.4   |
| mitochondrial ribosomal protein L17                                                                                                  | Mrpl17                                          | 15.86±1.22 |
| mitochondrial ribosomal protein L18 (predicted)                                                                                      | Mrpl18_predicted                                | 6.87±0.45  |
| mitochondrial ribosomal protein L19                                                                                                  | Mrpl19                                          | 2.11±0.08  |
| mitochondrial ribosomal protein L2                                                                                                   | Mrpl2                                           | 3.85±0.76  |
| mitochondrial ribosomal protein L20                                                                                                  | Mrpl20                                          | 6.64±0.69  |
| mitochondrial ribosomal protein L21 (predicted)                                                                                      | Mrpl21_predicted                                | 2.31±0.42  |
| mitochondrial ribosomal protein L22 (predicted)                                                                                      | Mrpl22_predicted                                | 5.31±0.39  |
| mitochondrial ribosomal protein L23                                                                                                  | Mrpl23                                          | 2.95±0.54  |
| mitochondrial ribosomal protein L24                                                                                                  | mrpl24                                          | 5.23±0.53  |
| mitochondrial ribosomal protein L27 (predicted)                                                                                      | Mrpl27_predicted                                | 10.06±0.87 |
| mitochondrial ribosomal protein L28                                                                                                  | Mrpl28                                          | 4.12±0.9   |
| mitochondrial ribosomal protein L3 (predicted)                                                                                       | Mrpl3_predicted                                 | 6.03±0.94  |

|                                                                                    |                     |            |
|------------------------------------------------------------------------------------|---------------------|------------|
| mitochondrial ribosomal protein L30 (predicted)                                    | Mrpl30_predicted    | 3.11±0.55  |
| mitochondrial ribosomal protein L32 (predicted)                                    | Mrpl32_predicted    | 5.06±0.73  |
| mitochondrial ribosomal protein L34                                                | Mrpl34              | 3.06±0.3   |
| mitochondrial ribosomal protein L35 (predicted)                                    | Mrpl35_predicted    | 4.62±0.58  |
| mitochondrial ribosomal protein L36 (predicted)                                    | Mrpl36_predicted    | 6.07±1.07  |
| mitochondrial ribosomal protein L37                                                | Mrpl37              | 4.71±0.71  |
| mitochondrial ribosomal protein L38                                                | Mrpl38              | 1.12±0.26  |
| mitochondrial ribosomal protein L4 (predicted)                                     | Mrpl4_predicted     | 4.93±1.11  |
| mitochondrial ribosomal protein L40                                                | Mrpl40              | 2.3±0.14   |
| mitochondrial ribosomal protein L41                                                | Mrpl41              | 11.23±0.36 |
| mitochondrial ribosomal protein L42 (predicted)                                    | Mrpl42_predicted    | 6.74±1.16  |
| mitochondrial ribosomal protein L43 (predicted)                                    | Mrpl43_predicted    | 4.58±0.31  |
| mitochondrial ribosomal protein L44                                                | Mrpl44              | 2.33±0.22  |
| mitochondrial ribosomal protein L45 (predicted)                                    | Mrpl45_predicted    | 2.65±0.33  |
| mitochondrial ribosomal protein L46                                                | Mrpl46              | 2.02±0.26  |
| mitochondrial ribosomal protein L47                                                | Mrpl47              | 1.87±0.75  |
| mitochondrial ribosomal protein L48 (predicted)                                    | Mrpl48_predicted    | 3.97±0.66  |
| Mitochondrial ribosomal protein L49                                                | Mrpl49              | 2.63±0.27  |
| mitochondrial ribosomal protein L50 (predicted)                                    | Mrpl50_predicted    | 6.32±0.17  |
| mitochondrial ribosomal protein L51 (predicted)                                    | Mrpl51_predicted    | 4.26±0.32  |
| mitochondrial ribosomal protein L52 (predicted)                                    | Mrpl52_predicted    | 1.37±0.08  |
| mitochondrial ribosomal protein L53 (predicted)                                    | Mrpl53_predicted    | 9.35±1.03  |
| mitochondrial ribosomal protein L54 (predicted)                                    | Mrpl54_predicted    | 7.63±1.28  |
| mitochondrial ribosomal protein L55 (predicted)                                    | Mrpl55_predicted    | 4.5±0.72   |
| mitochondrial ribosomal protein L9                                                 | mrpl9               | 3.27±0.24  |
| mitochondrial ribosomal protein S11                                                | Mrps11              | 4.13±0.5   |
| mitochondrial ribosomal protein S12 (predicted)                                    | Mrps12_predicted    | 3.12±0.41  |
| mitochondrial ribosomal protein S14 (predicted)                                    | Mrps14_predicted    | 6.19±0.83  |
| mitochondrial ribosomal protein S15                                                | Mrps15              | 2.32±0.23  |
| mitochondrial ribosomal protein S16                                                | Mrps16              | 7.83±1.19  |
| mitochondrial ribosomal protein S17 (predicted)                                    | Mrps17_predicted    | 8.35±0.28  |
| mitochondrial ribosomal protein S18A                                               | Mrps18a             | 3.55±0.52  |
| mitochondrial ribosomal protein S18C (predicted)                                   | Mrps18c_predicted   | 2.55±0.31  |
| mitochondrial ribosomal protein S2 (predicted)                                     | Mrps2_predicted     | 3.4±0.3    |
| mitochondrial ribosomal protein S21                                                | Mrps21              | 5.4±0.15   |
| mitochondrial ribosomal protein S23 (predicted)                                    | Mrps23_predicted    | 6.59±0.27  |
| mitochondrial ribosomal protein S24 (predicted)                                    | Mrps24_predicted    | 3.35±0.63  |
| mitochondrial ribosomal protein S25                                                | Mrps25              | 13.57±1.89 |
| mitochondrial ribosomal protein S26 (predicted)                                    | Mrps26_predicted    | 4.87±0.19  |
| mitochondrial ribosomal protein S27 (predicted)                                    | Mrps27_predicted    | 1.09±0.02  |
| mitochondrial ribosomal protein S30 (predicted)                                    | Mrps30_predicted    | 5.56±0.56  |
| mitochondrial ribosomal protein S31 (predicted)                                    | Mrps31_predicted    | 4.85±0.69  |
| mitochondrial ribosomal protein S33 (predicted)                                    | Mrps33_predicted    | 7.27±1.24  |
| mitochondrial ribosomal protein S34 (predicted)                                    | Mrps34_predicted    | 4.04±0.2   |
| mitochondrial ribosomal protein S35 (predicted)                                    | Mrps35_predicted    | 2.63±0.59  |
| mitochondrial ribosomal protein S36 (predicted)                                    | Mrps36_predicted    | 17.47±0.97 |
| mitochondrial ribosomal protein S5 (predicted)                                     | Mrps5_predicted     | 2.02±0.56  |
| mitochondrial ribosomal protein S9                                                 | Mrps9               | 3.15±0.78  |
| mitochondrial ribosome recycling factor                                            | Mrrf                | 1±0.09     |
| mitochondrial trans-2-enoyl-CoA reductase                                          | Mecr                | 1.77±0.14  |
| mitochondrial transcription termination factor                                     | Mterf               | 1.91±0.32  |
| mitochondrial translation optimization 1 homolog (S. cerevisiae) (predicted)       | Mto1_predicted      | 1.66±0.3   |
| mitochondrial translational initiation factor 2                                    | Mtif2               | 1.16±0.19  |
| mitochondrial translational release factor 1-like                                  | Mtrf1l              | 0.97±0.08  |
| mitochondrial tumor suppressor 1                                                   | Mtus1               | 2.87±0.32  |
| mitochondrial ubiquitin ligase activator of NFKB 1                                 | Mul1                | 0.48±0.25  |
| mitofusin 1                                                                        | Mfn1                | 3.94±0.48  |
| mitofusin 2                                                                        | Mfn2                | 3.74±0.35  |
| Mitogen activated protein kinase 1                                                 | Mapk1               | 3.77±1.05  |
| mitogen activated protein kinase 14                                                | Mapk14              | 4.49±0.42  |
| mitogen activated protein kinase 3                                                 | Mapk3               | 0.84±0.23  |
| mitogen activated protein kinase kinase 1                                          | Map2k1              | 1.97±0.27  |
| mitogen activated protein kinase kinase 2                                          | Map2k2              | 7.43±0.77  |
| mitogen activated protein kinase kinase 3                                          | Map2k3              | 2.06±0.33  |
| mitogen activated protein kinase kinase 4                                          | Map2k4              | 0.37±0.09  |
| mitogen activated protein kinase kinase 5                                          | Map2k5              | 0.9±0.2    |
| mitogen activated protein kinase kinase 7                                          | Map2k7              | 0.51±0.09  |
| mitogen activated protein kinase kinase kinase 12                                  | Map3k12             | 1.92±0.37  |
| mitogen activated protein kinase kinase kinase 3 (predicted)                       | Map3k3_predicted    | 0.52±0.08  |
| mitogen activated protein kinase kinase kinase 4 (predicted)                       | Map3k4_predicted    | 3.85±0.64  |
| Mitogen activated protein kinase kinase kinase 7 (predicted)                       | Map3k7_predicted    | 2.4±0.06   |
| mitogen activated protein kinase kinase kinase kinase 2 (predicted)                | Map4k2_predicted    | 0.36±0.06  |
| mitogen-activated protein binding protein interacting protein                      | Mapbbip             | 5.75±0.94  |
| mitogen-activated protein kinase 1 interacting protein 1                           | Mapk1ip1            | 0.63±0.18  |
| mitogen-activated protein kinase 6                                                 | Mapk6               | 2.95±0.13  |
| mitogen-activated protein kinase 8                                                 | Mapk8               | 0.62±0.05  |
| mitogen-activated protein kinase 8 interacting protein 1                           | Mapk8ip1            | 6.61±1.14  |
| mitogen-activated protein kinase 9                                                 | Mapk9               | 0.3±0.14   |
| mitogen-activated protein kinase associated protein 1                              | Mapkap1             | 1.55±0.11  |
| mitogen-activated protein kinase kinase 1 interacting protein 1                    | Map2k1ip1           | 5.58±0.09  |
| mitogen-activated protein kinase kinase 6                                          | Map2k6              | 1.16±0.09  |
| mitogen-activated protein kinase kinase kinase 11                                  | Map3k11             | 1.16±0.57  |
| mitogen-activated protein kinase kinase kinase 7 interacting protein 1 (predicted) | Map3k7ip1_predicted | 1.41±0.16  |
| mitogen-activated protein kinase kinase kinase 7 interacting protein 2             | Map3k7ip2           | 1.76±0.17  |
| mitogen-activated protein kinase kinase kinase kinase 3                            | Map4k3              | 1.86±0.34  |
| mitogen-activated protein kinase-activated protein kinase 3                        | Mapkapk3            | 0.78±0.15  |
| Mki67 (FHA domain) interacting nucleolar phosphoprotein                            | Mki67ip             | 3.37±0.15  |

|                                                                                                |                          |            |
|------------------------------------------------------------------------------------------------|--------------------------|------------|
| MLX interacting protein-like                                                                   | Mlxip1                   | 1.09±0.32  |
| MMR_HSR1 domain containing protein RGD1359460                                                  | RGD1359460               | 0.75±0.1   |
| MOB1, Mps One Binder kinase activator-like 1A (yeast) (predicted)                              | Mobkl1a_predicted        | 0.23±0.09  |
| MOB1, Mps One Binder kinase activator-like 1B (yeast)                                          | Mobkl1b                  | 2.2±0.49   |
| MOB1, Mps One Binder kinase activator-like 3 (yeast)                                           | Mobkl3                   | 1.46±0.63  |
| MOCO sulphurase C-terminal domain containing 2                                                 | Mosc2                    | 27.85±1.59 |
| MOCO sulphurase C-terminal domain containing-like moesin                                       | LOC690745                | 6.76±0.39  |
| molybdenum cofactor synthesis 2                                                                | Msn                      | 0.98±0.26  |
| MON1 homolog A (yeast) (predicted)                                                             | Mocs2                    | 13.2±2.47  |
| MON2 homolog (yeast)                                                                           | Mon1a_predicted          | 0.86±0.13  |
| monoamine oxidase A                                                                            | Mon2                     | 0.29±0.06  |
| monoamine oxidase B                                                                            | Maoa                     | 2.09±0.25  |
| Monoglyceride lipase                                                                           | Maob                     | 2.02±0.2   |
| Morf4 family associated protein 1                                                              | Mgll                     | 10.46±0.66 |
| mortality factor 4 like 1                                                                      | Mrfap1                   | 26.64±3.02 |
| mortality factor 4 like 1 /// similar to mortality factor 4 like 1 isoform b                   | Morf4l1                  | 13.27±1.48 |
| mortality factor 4 like 2                                                                      | LOC309220 /// Morf4l1    | 16.13±0.77 |
| motile sperm domain containing 1 /// similar to motile sperm domain containing 1               | Morf4l2                  | 12.94±0.4  |
| motile sperm domain containing 3                                                               | LOC686087 /// Mospd1     | 2.59±0.13  |
| M-phase phosphoprotein 1 (predicted)                                                           | Mospd3                   | 1.17±0.15  |
| M-phase phosphoprotein 10 (U3 small nucleolar ribonucleoprotein) (predicted)                   | Mphosph1_predicted       | 0.46±0.16  |
| M-phase phosphoprotein 8                                                                       | Mphosph10_predicted      | 0.64±0.06  |
| M-phase phosphoprotein 8 /// poly (ADP-ribose) polymerase family, member 4                     | Mphosph8                 | 3.44±0.59  |
| Mpv17 transgene, kidney disease mutant-like (predicted)                                        | Mphosph8 /// Parp4       | 1.1±0.13   |
| MRS2 magnesium homeostasis factor homolog (S. cerevisiae)                                      | Mpv17l_predicted         | 6.65±0.4   |
| MRT4, mRNA turnover 4, homolog (S. cerevisiae)                                                 | Mrs2                     | 1.16±0.18  |
| MTERF domain containing 1                                                                      | Mrto4                    | 0.89±0.19  |
| MTERF domain containing 2                                                                      | Mterfd1                  | 6.39±1.47  |
| MTERF domain containing 3                                                                      | Mterfd2                  | 2.47±0.12  |
| mucin and cadherin like                                                                        | Mterfd3                  | 0.72±0.18  |
| mucolin 1 (predicted)                                                                          | Mucdh1                   | 13.39±2.37 |
| multiple coagulation factor deficiency 2                                                       | Mcoln1_predicted         | 4.18±0.46  |
| multiple EGF-like-domains 8                                                                    | Mcfd2                    | 4.76±0.25  |
| multiple endocrine neoplasia 1                                                                 | Megf8                    | 0.27±0.07  |
| multiple inositol polyphosphate histidine phosphatase 1                                        | Men1                     | 1.52±0.19  |
| multiple PDZ domain protein                                                                    | Minpp1                   | 6.31±0.51  |
| Musashi homolog 2 (Drosophila)                                                                 | Mpdz                     | 0.7±0.06   |
| muskelin 1, intracellular mediator containing kelch motifs                                     | Msi2                     | 8.34±1.3   |
| muted                                                                                          | Mklin1                   | 4.37±0.44  |
| mutL homolog 1 (E. coli)                                                                       | Muted                    | 1.05±0.11  |
| mutL homolog 3 (E. coli) (predicted)                                                           | Mlh1                     | 1.59±0.14  |
| mutS homolog 2 (E. coli)                                                                       | Mlh3_predicted           | 0.74±0.07  |
| mutS homolog 3 (E. coli)                                                                       | Msh2                     | 0.79±0.2   |
| myb-like, SWIRM and MPN domains 1 (predicted)                                                  | Msh3                     | 0.61±0.12  |
| MYC binding protein 2                                                                          | Myrm1_predicted          | 0.45±0.11  |
| myc induced nuclear antigen                                                                    | Mycbp2                   | 3.86±0.61  |
| myelin basic protein expression factor 2, repressor                                            | Mina                     | 0.81±0.27  |
| myelin protein zero-like 2                                                                     | Myef2                    | 2.27±0.44  |
| myeloid cell leukemia sequence 1                                                               | Mpzl2                    | 1.41±0.39  |
| myeloid differentiation primary response gene 88                                               | Mcl1                     | 13.63±0.81 |
| myeloid leukemia factor 2 (predicted)                                                          | Myd88                    | 2.08±0.43  |
| myeloid/lymphoid or mixed lineage-leukemia translocation to 10 homolog (Drosophila)            | Mlf2_predicted           | 8.35±1.43  |
| myeloid/lymphoid or mixed lineage-leukemia translocation to 6 homolog (Drosophila) (predicted) | Mlit10                   | 1.72±0.21  |
| myeloid/lymphoid or mixed-lineage leukemia (trithorax homolog, Drosophila); translocated to, 1 | Mlit6_predicted          | 1.31±0.08  |
| myeloid/lymphoid or mixed-lineage leukemia 1                                                   | Mlit1                    | 0.32±0.14  |
| myeloid/lymphoid or mixed-lineage leukemia 5 (trithorax homolog, Drosophila)                   | Mlit1                    | 0.65±0.23  |
| myeloma overexpressed 2                                                                        | Mli5                     | 3.33±0.85  |
| Myocyte enhancer factor 2D                                                                     | Myeov2                   | 13.76±1.82 |
| myo-inositol oxygenase                                                                         | Mef2d                    | 0.51±0.14  |
| myosin 5B                                                                                      | Miox                     | 52.98±2.03 |
| myosin binding protein C, fast-type (predicted)                                                | Myo5b                    | 3.48±0.56  |
| myosin ID                                                                                      | Mybpc2_predicted         | 1.81±0.09  |
| myosin IE                                                                                      | Myo1d                    | 0.6±0.56   |
| myosin IXb                                                                                     | Myo1e                    | 0.78±0.35  |
| myosin light chain kinase 3                                                                    | Myo9b                    | 0.41±0.3   |
| myosin light chain, regulatory B                                                               | Myk3                     | 0.34±0.13  |
| myosin phosphatase-Rho interacting protein                                                     | Mrlcb                    | 8.54±2.53  |
| myosin Va                                                                                      | M-rip                    | 2.03±0.32  |
| myosin VI                                                                                      | Myo5a                    | 2.42±0.5   |
| myosin VIIb                                                                                    | Myo6                     | 10.64±0.65 |
| myosin X (predicted)                                                                           | Myo7b                    | 1.8±0.16   |
| myosin, heavy polypeptide 10, non-muscle                                                       | Myo10_predicted          | 1.6±0.17   |
| Myosin, heavy polypeptide 9, non-muscle                                                        | Myh10                    | 0.96±0.3   |
| myosin, light polypeptide 6, alkali, smooth muscle and non-muscle (predicted)                  | Myh9                     | 4.25±0.3   |
|                                                                                                | LOC684520 /// Myl6 ///   | 27.56±1.61 |
|                                                                                                | Myl6b /// Mvl6_predicted |            |
| myotrophin                                                                                     | Mtpn                     | 14.3±0.5   |
| Myotubularin related protein 1 (predicted)                                                     | Mtmr1_predicted          | 0.4±0.21   |
| myotubularin related protein 10                                                                | Mtmr10                   | 6.43±0.56  |
| myotubularin related protein 14                                                                | Mtmr14                   | 1.97±0.06  |
| myotubularin related protein 2 (predicted)                                                     | Mtmr2_predicted          | 4.92±0.39  |
| myotubularin related protein 3                                                                 | Mtmr3                    | 1.66±0.2   |
| myotubularin related protein 4 (predicted)                                                     | Mtmr4_predicted          | 3.11±0.4   |
| myotubularin related protein 6 (predicted)                                                     | Mtmr6_predicted          | 10.52±0.93 |
| myotubularin related protein 9                                                                 | Mtmr9                    | 1.17±0.27  |
| MYST histone acetyltransferase 2                                                               | Myst2                    | 1.42±0.05  |
| N-6 adenine-specific DNA methyltransferase 1 (putative)                                        | N6amt1                   | 2.34±0.34  |

|                                                                                                                        |                         |            |
|------------------------------------------------------------------------------------------------------------------------|-------------------------|------------|
| N-6 adenine-specific DNA methyltransferase 2 (putative)                                                                | N6amt2                  | 0.94±0.18  |
| Na <sup>+</sup> dependent glucose transporter 1                                                                        | Nagl1                   | 38.31±4.22 |
| N-acetyl galactosaminidase, alpha                                                                                      | Naga                    | 2.5±0.14   |
| N-acetylglucosamine kinase                                                                                             | Nagk                    | 3.78±0.45  |
| N-acetylglucosamine-1-phosphodiester alpha-N-acetylglucosaminidase (predicted)                                         | Nagpa_predicted         | 0.53±0.13  |
| N-acetylglucosamine-1-phosphotransferase, gamma subunit                                                                | Gnptg                   | 6.95±1.1   |
| N-acetylneuraminate pyruvate lyase                                                                                     | Npl                     | 8.15±0.33  |
| N-acetylneuraminic acid synthase (sialic acid synthase) (predicted)                                                    | Nans_predicted          | 2.36±0.26  |
| N-acetyltransferase 1 (arylamine N-acetyltransferase)                                                                  | Nat1                    | 0.77±0.05  |
| N-acetyltransferase 11                                                                                                 | Nat11                   | 0.84±0.02  |
| N-acetyltransferase 13                                                                                                 | Nat13                   | 1.11±0.08  |
| N-acetyltransferase 14                                                                                                 | Nat14                   | 0.22±0.02  |
| N-acetyltransferase 5 (ARD1 homolog, <i>S. cerevisiae</i> ) (predicted)                                                | Nat5_predicted          | 5.56±0.91  |
| N-acetyltransferase ARD1 homolog ( <i>S. cerevisiae</i> ) (predicted)                                                  | Ard1_predicted          | 0.35±0.09  |
| N-acylsphingosine amidohydrolase 1                                                                                     | Asah1                   | 4.74±0.54  |
| NAD kinase                                                                                                             | Nadk                    | 4.79±0.04  |
| NAD synthetase 1                                                                                                       | Nadsyn1                 | 2.63±0.21  |
| NAD(P) dependent steroid dehydrogenase-like                                                                            | Nsdhl                   | 3.02±0.47  |
| NAD(P) dependent steroid dehydrogenase-like                                                                            | Hspc105                 | 0.31±0.09  |
| NAD(P)H dehydrogenase, quinone 2                                                                                       | Nqo2                    | 16.08±0.49 |
| NADH dehydrogenase (ubiquinone) 1 alpha subcomplex 10-like 1 /// NADH dehydrogenase (ubiquinone) 1 alpha subcomplex 10 | Ndufa10 /// Ndufa10I1   | 9.23±1.63  |
| NADH dehydrogenase (ubiquinone) 1 alpha subcomplex 11                                                                  | Ndufa11                 | 12.21±2.04 |
| NADH dehydrogenase (ubiquinone) 1 alpha subcomplex 5                                                                   | Ndufa5                  | 4.78±0.05  |
| NADH dehydrogenase (ubiquinone) 1 alpha subcomplex, 1 (predicted)                                                      | Ndufa1_predicted        | 43.76±2.79 |
| NADH dehydrogenase (ubiquinone) 1 alpha subcomplex, 12 (predicted)                                                     | Ndufa12_predicted       | 23.83±2.56 |
| NADH dehydrogenase (ubiquinone) 1 alpha subcomplex, 13 (predicted)                                                     | Ndufa13_predicted       | 12.24±1.07 |
| NADH dehydrogenase (ubiquinone) 1 alpha subcomplex, 2 (predicted)                                                      | Ndufa2_predicted        | 16.44±2.29 |
| NADH dehydrogenase (ubiquinone) 1 alpha subcomplex, 4                                                                  | Ndufa4                  | 44.95±1.05 |
| NADH dehydrogenase (ubiquinone) 1 alpha subcomplex, 6 (B14) (predicted)                                                | Ndufa6_predicted        | 30.3±2.46  |
| NADH dehydrogenase (ubiquinone) 1 alpha subcomplex, 7 (B14.5a) (predicted)                                             | Ndufa7_predicted        | 9.12±3.99  |
| NADH dehydrogenase (ubiquinone) 1 alpha subcomplex, 8                                                                  | Ndufa8                  | 15.88±1.39 |
| NADH dehydrogenase (ubiquinone) 1 alpha subcomplex, 9                                                                  | Ndufa9                  | 17.9±1.91  |
| NADH dehydrogenase (ubiquinone) 1 alpha subcomplex, assembly factor 1 (predicted)                                      | Ndufa1_predicted        | 0.68±0.15  |
| NADH dehydrogenase (ubiquinone) 1 beta subcomplex 3 (predicted)                                                        | Ndub3_predicted         | 24.94±1.59 |
| NADH dehydrogenase (ubiquinone) 1 beta subcomplex 4                                                                    | Ndub4                   | 30.72±1.19 |
| NADH dehydrogenase (ubiquinone) 1 beta subcomplex, 11 (predicted)                                                      | Ndub11_predicted        | 27.56±1.2  |
| NADH dehydrogenase (ubiquinone) 1 beta subcomplex, 2 (predicted)                                                       | Ndub2_predicted         | 25.43±2.12 |
| NADH dehydrogenase (ubiquinone) 1 beta subcomplex, 5 (predicted)                                                       | Ndub5_predicted         | 36.39±5.06 |
| NADH dehydrogenase (ubiquinone) 1 beta subcomplex, 6 (predicted)                                                       | Ndub6_predicted         | 22.84±1.35 |
| NADH dehydrogenase (ubiquinone) 1 beta subcomplex, 7 (predicted)                                                       | Ndub7_predicted         | 12±2.7     |
| NADH dehydrogenase (ubiquinone) 1 beta subcomplex, 9 (predicted)                                                       | Ndub9_predicted         | 49.68±2.66 |
| NADH dehydrogenase (ubiquinone) 1, alpha                                                                               | LOC683884 ///           | 24.96±0.92 |
| NADH dehydrogenase (ubiquinone) 1, subcomplex unknown, 1                                                               | Ndubab1_predicted       |            |
| NADH dehydrogenase (ubiquinone) 1, subcomplex unknown, 2                                                               | Ndufc1                  | 22.82±2.49 |
| NADH dehydrogenase (ubiquinone) Fe-S protein 1                                                                         | Ndufc2                  | 24±0.29    |
| NADH dehydrogenase (ubiquinone) Fe-S protein 2                                                                         | Ndufs1                  | 28.23±2.77 |
| NADH dehydrogenase (ubiquinone) Fe-S protein 3 (predicted)                                                             | Ndufs2                  | 22.61±0.68 |
| NADH dehydrogenase (ubiquinone) Fe-S protein 4                                                                         | Ndufs3_predicted        | 16.95±1.2  |
| NADH dehydrogenase (ubiquinone) Fe-S protein 5                                                                         | Ndufs4                  | 2.22±0.22  |
| NADH dehydrogenase (ubiquinone) Fe-S protein 6                                                                         | Ndufs5                  | 24.38±0.99 |
| NADH dehydrogenase (ubiquinone) Fe-S protein 7                                                                         | LOC679739 /// LOC692052 | 24.91±1.41 |
| NADH dehydrogenase (ubiquinone) Fe-S protein 8 (predicted)                                                             | /// Ndufs6              |            |
| NADH dehydrogenase (ubiquinone) flavoprotein 1                                                                         | Ndufs7                  | 15.05±3.34 |
| NADH dehydrogenase (ubiquinone) flavoprotein 2                                                                         | Ndufs8_predicted        | 14.95±1.67 |
| NADH dehydrogenase (ubiquinone) flavoprotein 3-like                                                                    | Ndufv1                  | 14.59±1.38 |
| NADH dehydrogenase subunit 1                                                                                           | Ndufv2                  | 23.23±1.58 |
| NADH dehydrogenase subunit 2                                                                                           | LOC682566 /// Ndufv3I   | 14.53±1.26 |
| NADH dehydrogenase subunit 3                                                                                           | ND1                     | 62.3±1.74  |
| NADPH oxidase 4                                                                                                        | ND2                     | 80.18±4.84 |
| napsin A aspartic peptidase                                                                                            | ND3                     | 61.59±5.33 |
| nardilysin, N-arginine dibasic convertase, NRD convertase 1                                                            | Nox4                    | 24.63±2.5  |
| nascent-polypeptide-associated complex alpha polypeptide (predicted)                                                   | Napsa                   | 53.72±5.31 |
| NAT9                                                                                                                   | Nrd1                    | 2.96±0.34  |
| NCK interacting protein with SH3 domain (predicted)                                                                    | Naca_predicted          | 20.89±2.86 |
| NCK-associated protein 1                                                                                               | Nat9                    | 0.45±0.14  |
| N-deacetylase/N-sulfotransferase (heparan glucosaminyl) 2 (predicted)                                                  | Nckipsd_predicted       | 0.32±0.08  |
| NECAP endocytosis associated 1                                                                                         | Nckap1                  | 28.89±1.92 |
| NECAP endocytosis associated 2                                                                                         | Ndst2_predicted         | 1.07±0.16  |
| necdin-like 2                                                                                                          | Necap1                  | 2.06±0.19  |
| Nedd4 binding protein 1                                                                                                | Necap2                  | 1.98±0.62  |
| NEDD4 binding protein 2-like 2                                                                                         | Ndn12                   | 0.69±0.12  |
| Nedd4 family interacting protein 1                                                                                     | N4bp1                   | 0.23±0.1   |
| Nedd4 family interacting protein 2 (predicted)                                                                         | N4bp2I2                 | 3.49±0.74  |
| NEDD8 ultimate buster-1                                                                                                | Ndfip1                  | 20.1±1.58  |
| NEFA-interacting nuclear protein NIP30                                                                                 | Ndfip2_predicted        | 15.19±1.27 |
| nei endonuclease VIII-like 1 ( <i>E. coli</i> )                                                                        | Nub1                    | 1.48±0.16  |
| neighbor of Brca1 gene 1                                                                                               | Nip30                   | 3.24±0.38  |
| neighbor of Brca1 gene 1 /// similar to neighbor of Brca1 gene 1                                                       | Neil1                   | 1.64±0.45  |
| nemo like kinase                                                                                                       | Nbr1                    | 9.7±0.99   |
| neogenin                                                                                                               | LOC498369 /// Nbr1      | 0.92±0.19  |
| nephronophthisis 1 (juvenile) homolog (human) (predicted)                                                              | Nlk                     | 0.26±0.09  |
| nerve growth factor receptor (TNFRSF16) associated protein 1                                                           | Neo1                    | 1.54±0.12  |
| N-ethylmaleimide sensitive fusion protein                                                                              | Nphp1_predicted         | 5.08±0.32  |
| N-ethylmaleimide sensitive fusion protein attachment protein alpha                                                     | Nqfrap1                 | 8.44±0.75  |
| N-ethylmaleimide sensitive fusion protein attachment protein gamma                                                     | Nsf                     | 1.12±0.12  |
|                                                                                                                        | Napa                    | 9.19±0.74  |
|                                                                                                                        | Napg                    | 2.32±0.39  |



|                                                                               |                   |            |
|-------------------------------------------------------------------------------|-------------------|------------|
| neural precursor cell expressed, developmentally down-regulated gene 4        | Nedd4             | 10.49±0.65 |
| neural precursor cell expressed, developmentally down-regulated gene 4-like   | Nedd4l            | 1.11±0.34  |
| neural precursor cell expressed, developmentally down-regulated gene 8        | Nedd8             | 19.47±0.31 |
| neural precursor cell expressed, developmentally down-regulated gene 9        | Nedd9             | 3.99±0.27  |
| neural proliferation, differentiation and control, 1                          | Npdc1             | 4.34±0.32  |
| neuralized-like 2 ( <i>Drosophila</i> ) (predicted)                           | Neurl2_predicted  | 2.47±0.36  |
| neuraminidase 1                                                               | Neu1              | 4.79±0.37  |
| neuregulin 1                                                                  | Nrg1              | 0.84±0.19  |
| neuroblastoma ras oncogene                                                    | Nras              | 0.42±0.27  |
| neurocalcin delta                                                             | Ncald             | 0.92±0.08  |
| neuroepithelial cell transforming gene 1                                      | Net1              | 13.71±0.41 |
| neurofibromatosis 2                                                           | Nf2               | 2.25±0.2   |
| neuroquinin, EIF4E binding protein                                            | Nqdn              | 1.03±0.14  |
| neurolysin (metallopeptidase M3 family)                                       | Nln               | 1.54±0.23  |
| neuromedin B (predicted)                                                      | Nmb_predicted     | 0.83±0.04  |
| Neuronal regeneration related protein                                         | Nrep              | 28.65±3.29 |
| Neuropilin 1                                                                  | Nrp1              | 0.96±0.31  |
| neuroplastin                                                                  | Nptn              | 14.73±1.69 |
| neurotrophin 3                                                                | Ntf3              | 4.94±0.72  |
| neutral sphingomyelinase (N-SMase) activation associated factor               | Nsmaf             | 2.27±0.22  |
| NFKB activating protein                                                       | Nkap              | 0.47±0.05  |
| NFKB inhibitor interacting Ras-like protein 1 (predicted)                     | Nkiras1_predicted | 0.65±0.02  |
| NFKB inhibitor interacting Ras-like protein 2 (predicted)                     | Nkiras2_predicted | 0.79±0.12  |
| NFU1 iron-sulfur cluster scaffold homolog ( <i>S. cerevisiae</i> )            | Nfu1              | 1.24±0.26  |
| Ngfi-A binding protein 1                                                      | Nab1              | 0.57±0.2   |
| Ngfi-A binding protein 2                                                      | Nab2              | 0.51±0.25  |
| Ngg1 interacting factor 3-like 1 ( <i>S. pombe</i> )                          | Nif3l1            | 0.95±0.1   |
| N-glycanase 1                                                                 | Ngly1             | 6.39±1.02  |
| NHL repeat containing 2 (predicted)                                           | Nhlrc2_predicted  | 0.59±0.08  |
| NHL repeat containing 3                                                       | Nhlrc3            | 1.74±0.17  |
| nibrin                                                                        | Nbn               | 3.3±0.52   |
| nicalin homolog (zebrafish)                                                   | Ncln              | 3.81±0.68  |
| nicastrin                                                                     | Ncstn             | 1.97±0.21  |
| nicolin 1                                                                     | Nicn1             | 2.61±0.29  |
| nicotinamide nucleotide adenylyltransferase 1                                 | Nmnat1            | 0.59±0.07  |
| nicotinamide nucleotide adenylyltransferase 3                                 | Nmnat3            | 2.69±0.12  |
| nicotinamide nucleotide transhydrogenase                                      | Nnt               | 27.4±1.43  |
| nicotinate phosphoribosyltransferase domain containing 1                      | Naprt1            | 28.15±1.74 |
| nidogen 2                                                                     | Nid2              | 0.43±0.79  |
| Niemann Pick type C2                                                          | Npc2              | 15.38±1.83 |
| NIK and IKK(beta) binding protein                                             | Nipb              | 0.69±0.18  |
| NIMA (never in mitosis gene a)- related kinase 9 (predicted)                  | Nek9_predicted    | 4.37±0.8   |
| NIMA (never in mitosis gene a)-related expressed kinase 3 (predicted)         | Nek3_predicted    | 0.42±0.28  |
| NIMA (never in mitosis gene a)-related expressed kinase 7                     | Nek7              | 4.42±0.69  |
| NIN1/RPN12 binding protein 1 homolog ( <i>S. cerevisiae</i> )                 | Nob1              | 2.56±0.06  |
| ninjurin 1                                                                    | Ninj1             | 9.37±0.73  |
| NIPA-like domain containing 2                                                 | Npal2             | 0.27±0.32  |
| Nipped-B homolog ( <i>Drosophila</i> )                                        | NIPBL             | 1.31±0.16  |
| nischarin                                                                     | Nisch             | 3.73±0.62  |
| nitric oxide synthase interacting protein (predicted)                         | Nosip_predicted   | 0.92±0.34  |
| nitric oxide synthase trafficker                                              | Nostrin           | 0.89±0.22  |
| nitrilase 1                                                                   | Nit1              | 12.56±0.37 |
| nitrilase family, member 2                                                    | Nit2              | 19.25±1.05 |
| nitrogen fixation gene 1 ( <i>S. cerevisiae</i> )                             | Nfs1              | 18.16±1.43 |
| NLR family member X1                                                          | Nlrp1             | 1.42±0.2   |
| NLR family, pyrin domain containing 6                                         | Nlrp6             | 1.64±0.27  |
| NMD3 homolog ( <i>S. cerevisiae</i> ) (predicted)                             | Nmd3_predicted    | 2.54±0.52  |
| NMDA receptor-regulated gene 1 (predicted)                                    | Narg1_predicted   | 3.73±0.38  |
| N-methylpurine-DNA glycosylase                                                | Mpg               | 0.39±0.09  |
| NmrA-like family domain containing 1                                          | Nmr1              | 1.05±0.09  |
| N-myc downstream regulated gene 1                                             | Ndr1              | 55.07±2.4  |
| N-myc downstream regulated gene 3                                             | Ndr3              | 0.67±0.1   |
| N-myristoyltransferase 1                                                      | Nmt1              | 2.49±0.23  |
| nodal modulator 1                                                             | Nomo1             | 2.09±0.45  |
| NOL1/NOP2/Sun domain family, member 2                                         | Nsun2             | 2.29±0.28  |
| NOL1/NOP2/Sun domain family, member 4 (predicted)                             | Nsun4_predicted   | 1.56±0.23  |
| NOL1/NOP2/Sun domain family, member 5 (predicted)                             | Nsun5_predicted   | 0.4±0.13   |
| non imprinted in Prader-Willi/Angelman syndrome 2 homolog (human) (predicted) | Nipa2_predicted   | 1.93±0.24  |
| non-catalytic region of tyrosine kinase adaptor protein 1 (predicted)         | Nck1_predicted    | 2.11±0.44  |
| nonhomologous end-joining factor 1                                            | Nhej1             | 0.58±0.09  |
| non-metastatic cells 3, protein expressed in                                  | Nme3              | 2.96±0.1   |
| non-metastatic cells 6, protein expressed in (nucleoside-diphosphate kinase)  | Nme6              | 0.5±0.13   |
| non-POU-domain-containing, octamer-binding protein                            | Nono              | 8.19±1.08  |
| non-SMC condensin II complex, subunit D3                                      | Ncapd3            | 0.43±0.14  |
| non-SMC condensin II complex, subunit H2                                      | Ncaph2            | 0.81±0.08  |
| non-SMC element 1 homolog ( <i>S. cerevisiae</i> )                            | Nsmce1            | 2.91±0.22  |
| non-SMC element 2, MMS21 homolog ( <i>S. cerevisiae</i> )                     | Nsmce2            | 1.43±0.42  |
| non-SMC element 4 homolog A ( <i>S. cerevisiae</i> )                          | Nsmce4a           | 5.05±0.62  |
| notch1-induced protein                                                        | LOC493574         | 0.56±0.11  |
| notchless homolog 1 ( <i>Drosophila</i> ) (predicted)                         | Nle1_predicted    | 0.46±0.15  |
| NSSA (hepatitis C virus) transactivated protein 9                             | Ns5atp9           | 0.35±0.15  |
| NSFL1 (p97) cofactor (p47)                                                    | Nsfl1c            | 2.34±0.24  |
| N-terminal asparagine amidase                                                 | Ntan1             | 7.59±0.36  |
| NTF2-related export protein 1 (predicted)                                     | Nxt1_predicted    | 0.6±0.06   |
| NUAK family, SNF1-like kinase, 2                                              | Nuak2             | 3.94±0.72  |
| nuclear autoantigenic sperm protein (histone-binding)                         | Nasp              | 0.6±0.29   |
| nuclear cap binding protein subunit 1, 80kDa                                  | Ncbp1             | 18.69±0.48 |

|                                                                                                                             |                     |            |
|-----------------------------------------------------------------------------------------------------------------------------|---------------------|------------|
| nuclear casein kinase and cyclin-dependent kinase substrate 1                                                               | Nucks1              | 2.59±0.19  |
| nuclear distribution gene C homolog (Aspergillus)                                                                           | Nudc                | 3.12±0.14  |
| nuclear distribution gene E homolog 1 (A nidulans)                                                                          | Nde1                | 1.05±0.07  |
| nuclear distribution gene E-like homolog 1 (A. nidulans)                                                                    | Ndel1               | 5.59±0.41  |
| nuclear factor I/A                                                                                                          | Nfia                | 5.39±1.9   |
| nuclear factor I/B                                                                                                          | Nfib                | 1.24±0.44  |
| Nuclear factor I/C                                                                                                          | Nfic                | 1.07±0.77  |
| nuclear factor of activated T-cells 5 (predicted)                                                                           | Nfat5_predicted     | 1.16±0.13  |
| nuclear factor of activated T-cells, cytoplasmic, calcineurin-dependent 3 (predicted)                                       | Nfatc3_predicted    | 1.13±0.08  |
| nuclear factor of kappa light chain gene enhancer in B-cells inhibitor, beta                                                | Nfkbib              | 1.55±0.17  |
| nuclear factor of kappa light polypeptide gene enhancer in B-cells 1, p105                                                  | Nfkb1               | 1.55±0.44  |
| nuclear factor related to kappa B binding protein (predicted)                                                               | Nfrkb_predicted     | 0.63±0.1   |
| nuclear factor, erythroid derived 2, like 2                                                                                 | Nfe2l2              | 8.18±2.16  |
| nuclear factor, erythroid derived 2,-like 1 (predicted)                                                                     | Nfe2l1_predicted    | 0.69±0.2   |
| nuclear fragile X mental retardation protein interacting protein 1                                                          | Nufip1              | 1.51±0.06  |
| nuclear import 7 homolog (S. cerevisiae)                                                                                    | Nip7                | 1.91±0.08  |
| nuclear mitotic apparatus protein 1                                                                                         | Numa1               | 0.94±0.17  |
| nuclear pore associated protein                                                                                             | Npap60              | 0.28±0.08  |
| nuclear pore membrane protein 121                                                                                           | Pom121              | 0.55±0.34  |
| nuclear prelamin A recognition factor                                                                                       | Narf                | 1.9±0.46   |
| nuclear prelamin A recognition factor-like                                                                                  | Narfl               | 1.48±0.02  |
| nuclear protein E3-3                                                                                                        | RGD708545           | 3.93±0.24  |
| nuclear protein in the AT region (predicted)                                                                                | Npat_predicted      | 0.46±0.17  |
| nuclear protein localization 4 homolog (S. cerevisiae)                                                                      | Nploc4              | 1.59±0.1   |
| nuclear receptor binding factor 2                                                                                           | Nrbf2               | 1.39±0.19  |
| nuclear receptor binding protein                                                                                            | Nrbp                | 0.71±0.17  |
| Nuclear receptor binding SET domain protein 1 (predicted)                                                                   | Nsd1_predicted      | 2.16±0.49  |
| nuclear receptor coactivator 1 (predicted)                                                                                  | Ncoa1_predicted     | 3.26±0.81  |
| nuclear receptor coactivator 4 (predicted)                                                                                  | Ncoa4_predicted     | 16.24±1.66 |
| nuclear receptor coactivator 5 (predicted)                                                                                  | Ncoa5_predicted     | 0.39±0.14  |
| nuclear receptor coactivator 6                                                                                              | Ncoa6               | 1.17±0.43  |
| nuclear receptor coactivator 7                                                                                              | Ncoa7               | 14.07±1.46 |
| nuclear receptor co-repressor 1                                                                                             | Ncor1               | 4.19±0.19  |
| nuclear receptor subfamily 1, group D, member 2                                                                             | Nr1d2               | 3.42±0.59  |
| nuclear receptor subfamily 1, group H, member 2                                                                             | Nr1h2               | 1.8±0.17   |
| nuclear receptor subfamily 1, group H, member 3                                                                             | Nr1h3               | 2.43±0.1   |
| nuclear receptor subfamily 1, group H, member 4                                                                             | Nr1h4               | 13.63±0.18 |
| nuclear receptor subfamily 1, group I, member 2                                                                             | Nr1i2               | 1.11±0.05  |
| nuclear receptor subfamily 2, group F, member 2                                                                             | Nr2f2               | 1±0.48     |
| nuclear receptor subfamily 2, group F, member 6                                                                             | Nr2f6               | 2.52±0.86  |
| nuclear receptor subfamily 2, group F, member 6 /// similar to Orphan nuclear receptor EAR-2 (V-erbA-related protein EAR-2) | LOC688367 /// Nr2f6 | 0.59±0.14  |
| nuclear receptor subfamily 3, group C, member 1                                                                             | Nr3c1               | 4.33±0.28  |
| nuclear RNA export factor 1                                                                                                 | Nxf1                | 3.1±0.25   |
| nuclear transcription factor, X-box binding 1                                                                               | Nfx1                | 0.99±0.06  |
| nuclear transcription factor-Y beta                                                                                         | Nfyb                | 0.48±0.14  |
| nuclear transcription factor-Y gamma                                                                                        | Nfyc                | 3.53±0.49  |
| nuclear transport factor 2                                                                                                  | Nutf2               | 3.33±1.2   |
| nuclear transport factor 2-like export factor 2 (predicted)                                                                 | Nxt2_predicted      | 2.12±0.18  |
| nuclear undecaprenyl pyrophosphate synthase 1 homolog (S. cerevisiae)                                                       | Nus1                | 3.96±0.4   |
| nuclear VCP-like (predicted)                                                                                                | Nvl_predicted       | 0.55±0.15  |
| nucleobindin 1                                                                                                              | Nucb1               | 8.12±1.11  |
| nucleolar and coiled-body phosphoprotein 1                                                                                  | Nolc1               | 1±0.15     |
| nucleolar and spindle associated protein 1 (predicted)                                                                      | Nusap1_predicted    | 0.32±0.11  |
| nucleolar complex associated 4 homolog (S. cerevisiae)                                                                      | Noc4l               | 0.61±0.11  |
| nucleolar protein 1 (predicted)                                                                                             | Nol1_predicted      | 1.51±0.04  |
| nucleolar protein 14                                                                                                        | Nol14               | 0.68±0.13  |
| nucleolar protein 5                                                                                                         | Nol5                | 1.4±0.27   |
| nucleolar protein 5A                                                                                                        | Nol5a               | 3.15±0.59  |
| nucleolar protein 7                                                                                                         | Nol7                | 5.12±0.89  |
| nucleolar protein 8 (predicted)                                                                                             | Nol8_predicted      | 0.36±0.09  |
| nucleolar protein 9                                                                                                         | Nol9                | 0.81±0.25  |
| nucleolar protein family 6 (RNA-associated) (predicted)                                                                     | Nol6_predicted      | 0.93±0.09  |
| nucleolar protein family A, member 1 (H/ACA small nucleolar RNPs)                                                           | Nola1               | 0.62±0.05  |
| nucleolar protein family A, member 2 (predicted)                                                                            | Nola2_predicted     | 2.44±0.11  |
| nucleolar protein family A, member 3                                                                                        | Nola3               | 11.86±0.93 |
| nucleolin                                                                                                                   | Ncl                 | 7.67±0.29  |
| nucleophosmin 1                                                                                                             | Npm1                | 13.47±1.14 |
| nucleophosmin 1 /// similar to Nucleophosmin (NPM) (Nucleolar phosphoprotein B23) (Numatrin) (Nucleolar protein NO38)       | LOC300303 /// Npm1  | 1.6±0.23   |
| nucleoporin 133 (predicted)                                                                                                 | Nup133_predicted    | 0.2±0.12   |
| nucleoporin 153                                                                                                             | Nup153              | 3.55±0.39  |
| nucleoporin 155                                                                                                             | Nup155              | 1.05±0.17  |
| nucleoporin 160 (predicted)                                                                                                 | Nup160_predicted    | 0.77±0.13  |
| nucleoporin 188                                                                                                             | Nup188              | 0.76±0.14  |
| nucleoporin 205                                                                                                             | Nup205              | 1.46±0.08  |
| nucleoporin 35                                                                                                              | Nup35               | 1.77±0.14  |
| nucleoporin 37 (predicted)                                                                                                  | Nup37_predicted     | 1.71±0.05  |
| nucleoporin 54                                                                                                              | Nup54               | 0.5±0.14   |
| nucleoporin 62                                                                                                              | Nup62               | 0.35±0.14  |
| nucleoporin 85                                                                                                              | Nup85               | 0.53±0.11  |
| nucleoporin 88                                                                                                              | Nup88               | 1.34±0.03  |
| nucleoporin 93                                                                                                              | Nup93               | 0.43±0.05  |
| nucleoporin 98                                                                                                              | Nup98               | 1.07±0.3   |
| nucleoporin like 1                                                                                                          | Nupl1               | 1.28±0.16  |
| nucleoporin like 2                                                                                                          | Nupl2               | 0.65±0.09  |
| Nucleoside 2-deoxyribosyltransferase domain containing protein RGD620382                                                    | RGD620382           | 0.44±0.07  |
| nucleoside phosphorylase                                                                                                    | Np                  | 0.54±0.91  |
| Nucleosome assembly protein 1-like 1                                                                                        | Nap11l              | 5.27±0.16  |

|                                                                                                                          |                      |            |
|--------------------------------------------------------------------------------------------------------------------------|----------------------|------------|
| nucleosome assembly protein 1-like 3                                                                                     | Nap13                | 1.59±0.26  |
| nucleosome assembly protein 1-like 4                                                                                     | Nap14                | 2.21±0.13  |
| nucleosome binding protein 1 (predicted)                                                                                 | Nsbp1_predicted      | 0.37±0.08  |
| nucleotide binding protein 1                                                                                             | Nubp1                | 4.59±0.39  |
| nucleotide binding protein 2                                                                                             | Nubp2                | 6.02±0.54  |
| nucleotide binding protein-like (predicted)                                                                              | Nubp1_predicted      | 0.97±0.16  |
| NudC domain containing 1 (predicted)                                                                                     | Nudcd1_predicted     | 0.43±0.06  |
| NudC domain containing 2                                                                                                 | Nudcd2               | 1.24±0.15  |
| nudix (nucleoside diphosphate linked moiety X)-type motif 1                                                              | Nudt1                | 0.48±0.1   |
| nudix (nucleoside diphosphate linked moiety X)-type motif 12 (predicted)                                                 | Nudt12_predicted     | 3.54±0.69  |
| nudix (nucleoside diphosphate linked moiety X)-type motif 14 (predicted)                                                 | Nudt14_predicted     | 2.15±0.7   |
| nudix (nucleoside diphosphate linked moiety X)-type motif 16 (predicted)                                                 | Nudt16_predicted     | 0.21±0.2   |
| nudix (nucleoside diphosphate linked moiety X)-type motif 16-like 1                                                      | Nudt16l1             | 7.58±0.65  |
| nudix (nucleoside diphosphate linked moiety X)-type motif 18                                                             | Nudt18               | 1.17±0.18  |
| nudix (nucleoside diphosphate linked moiety X)-type motif 19                                                             | Nudt19               | 3.4±0.11   |
| nudix (nucleoside diphosphate linked moiety X)-type motif 2                                                              | Nudt2                | 3.08±0.31  |
| nudix (nucleoside diphosphate linked moiety X)-type motif 22                                                             | Nudt22               | 0.83±0.16  |
| nudix (nucleoside diphosphate linked moiety X)-type motif 5                                                              | Nudt5                | 1.13±0.12  |
| nudix (nucleoside diphosphate linked moiety X)-type motif 6                                                              | Nudt6                | 1.01±0.12  |
| nudix (nucleoside diphosphate linked moiety X)-type motif 7 (predicted)                                                  | Nudt7_predicted      | 4.37±0.32  |
| nudix (nucleoside diphosphate linked moiety X)-type motif 9                                                              | Nudt9                | 0.98±0.08  |
| nudix (nucleoside diphosphate linked moiety X)-type motif 3                                                              | Nudt3                | 2.71±1.22  |
| NUF2, NDC80 kinetochore complex component, homolog (S. cerevisiae)                                                       | Nuf2                 | 0.35±0.08  |
| Numb gene homolog (Drosophila)                                                                                           | Numb                 | 4.57±0.11  |
| Nur77 downstream gene 2                                                                                                  | Ndg2                 | 49.18±3.17 |
| O-6-methylguanine-DNA methyltransferase                                                                                  | Mgmt                 | 1.28±0.03  |
| OAF homolog (Drosophila)                                                                                                 | Oaf                  | 3.76±0.57  |
| Obg-like ATPase 1                                                                                                        | Ola1                 | 5.43±0.57  |
| occludin /// thiopurine methyltransferase                                                                                | Ocln /// Tpmt        | 1.48±0.27  |
| OCIA domain containing 1                                                                                                 | Ociad1               | 10.3±1.18  |
| oculocerebrorenal syndrome of Lowe                                                                                       | Ocrl                 | 0.37±0.13  |
| odd-skipped related 2 (Drosophila)                                                                                       | Osr2                 | 0.7±0.16   |
| olfactomedin-like 1                                                                                                      | Olfml1               | 12.99±2.94 |
| olfactomedin-like 2A (predicted)                                                                                         | Olfml2a_predicted    | 0.48±0.32  |
| oligonucleotide/oligosaccharide-binding fold containing 1                                                                | Obfc1                | 0.49±0.02  |
| oligonucleotide/oligosaccharide-binding fold containing 2A                                                               | Obfc2a               | 12.33±1.89 |
| oligonucleotide/oligosaccharide-binding fold containing 2B                                                               | Obfc2b               | 1.58±0.19  |
| O-linked N-acetylglucosamine (GlcNAc) transferase (UDP-N-acetylglucosamine:polypeptide-N-acetylglucosaminyl transferase) | Ogt                  | 4.65±0.28  |
| OMA1 homolog, zinc metallopeptidase (S. cerevisiae) (predicted)                                                          | Oma1_predicted       | 3.17±0.3   |
| open reading frame 19                                                                                                    | ORF19                | 2.15±0.07  |
| opioid growth factor receptor                                                                                            | Ogfr                 | 0.98±0.4   |
| opioid growth factor receptor-like 1                                                                                     | Ogfrl1               | 0.42±0.17  |
| opioid receptor, sigma 1                                                                                                 | Oprs1                | 1.28±0.1   |
| opsin 3                                                                                                                  | Opn3                 | 0.3±0.04   |
| optic atrophy 1 homolog (human)                                                                                          | Opa1                 | 1.65±0.23  |
| optic atrophy 3                                                                                                          | Opa3                 | 0.93±0.14  |
| optineurin                                                                                                               | Optn                 | 1.43±0.06  |
| ORAI calcium release-activated calcium modulator 1                                                                       | Orai1                | 0.91±0.15  |
| ORAI calcium release-activated calcium modulator 3                                                                       | Orai3                | 0.4±0.07   |
| ORAI calcium release-activated calcium modulator 3 /// similar to KIAA0339 protein                                       | Orai3 /// RGD1311624 | 0.73±0.06  |
| oral cancer overexpressed 1 (predicted)                                                                                  | Oraov1_predicted     | 0.58±0.06  |
| oral-facial-digital syndrome 1 gene homolog (human)                                                                      | Ofd1                 | 0.24±0.06  |
| organic solute transporter alpha                                                                                         | Osta                 | 4.66±0.73  |
| origin recognition complex, subunit 2-like (S. cerevisiae)                                                               | Orc2l                | 0.99±0.37  |
| origin recognition complex, subunit 3-like (S. cerevisiae)                                                               | Orc3l                | 0.28±0.06  |
| origin recognition complex, subunit 4                                                                                    | Orc4                 | 2.13±0.12  |
| origin recognition complex, subunit 4-like (S. cerevisiae)                                                               | Orc4l                | 1.86±0.31  |
| origin recognition complex, subunit 5-like (S. cerevisiae)                                                               | Orc5l                | 0.84±0.18  |
| origin recognition complex, subunit 6-like (S. cerevisiae)                                                               | Orc6l                | 0.39±0.15  |
| ORM1-like 2 (S. cerevisiae) (predicted)                                                                                  | Ormdl2_predicted     | 7.82±0.59  |
| ORM1-like 3 (S. cerevisiae)                                                                                              | Ormdl3               | 2.66±0.08  |
| ornithine aminotransferase                                                                                               | Oat                  | 7.91±1.43  |
| ornithine decarboxylase antizyme 1                                                                                       | Oaz1                 | 22.38±2.84 |
| O-sialoglycoprotein endopeptidase                                                                                        | Osgp                 | 1.02±0.09  |
| O-sialoglycoprotein endopeptidase-like 1                                                                                 | Osgp1l               | 1.12±0.2   |
| osteoclast stimulating factor 1                                                                                          | Ostf1                | 2.6±0.21   |
| osteomodulin                                                                                                             | Omd                  | 0.32±0.06  |
| osteopetrosis associated transmembrane protein 1                                                                         | Ostm1                | 4.97±0.44  |
| OTU domain containing 1                                                                                                  | Otud1                | 0.65±0.47  |
| OTU domain containing 5                                                                                                  | Otud5                | 2.5±0.04   |
| OTU domain containing 7B                                                                                                 | Otud7b               | 0.43±0.05  |
| OTU domain containing 7B /// myotubularin related protein 11                                                             | Mtmr11 /// Otud7b    | 1.27±0.38  |
| OTU domain, ubiquitin aldehyde binding 1 (predicted)                                                                     | Otub1_predicted      | 2.38±0.57  |
| outer dense fiber of sperm tails 2-like                                                                                  | Odf2l                | 0.84±0.2   |
| oxidase assembly 1-like                                                                                                  | Oxa1l                | 8.54±0.72  |
| oxidation resistance 1                                                                                                   | Oxr1                 | 1.2±0.21   |
| oxidative stress induced growth inhibitor family member 2                                                                | Osgin2               | 0.25±0.14  |
| oxidative stress responsive gene                                                                                         | RGD1303142           | 1.39±0.24  |
| oxidative-stress responsive 1 (predicted)                                                                                | Oxsr1_predicted      | 1.45±0.16  |
| oxidoreductase NAD-binding domain containing 1 (predicted)                                                               | Oxnad1_predicted     | 2.41±0.14  |
| oxoglutarate dehydrogenase (lipoamide)                                                                                   | Ogdh                 | 29.82±2.13 |
| oxysterol binding protein (predicted)                                                                                    | Osbp_predicted       | 1.77±0.3   |
| oxysterol binding protein-like 11 (predicted)                                                                            | Osbpl11_predicted    | 1.62±0.21  |
| oxysterol binding protein-like 1A                                                                                        | Osbpl1a              | 2.46±0.25  |
| oxysterol binding protein-like 2                                                                                         | Osbpl2               | 2.73±0.22  |
| oxysterol binding protein-like 3                                                                                         | Osbpl3               | 0.87±0.06  |

|                                                                              |                      |            |
|------------------------------------------------------------------------------|----------------------|------------|
| oxysterol binding protein-like 7 (predicted)                                 | Osbp17_predicted     | 0.43±0.11  |
| oxysterol binding protein-like 9 (predicted)                                 | Osbp19_predicted     | 2.89±0.53  |
| P18SRP protein                                                               | P18srp               | 1.88±0.29  |
| P21 (CDKN1A)-activated kinase 1                                              | Pak1                 | 1.12±0.3   |
| P21 (CDKN1A)-activated kinase 2                                              | Pak2                 | 0.79±0.15  |
| p21 (CDKN1A)-activated kinase 4 (predicted)                                  | Pak4_predicted       | 0.67±0.29  |
| p300/CBP-associated factor                                                   | Pcaf                 | 5.11±0.24  |
| p34 protein                                                                  | P34                  | 0.38±0.19  |
| P450 (cytochrome) oxidoreductase                                             | Por                  | 7.21±1.85  |
| p53 and DNA damage regulated 1                                               | Pdrq1                | 0.7±0.21   |
| P55                                                                          | LOC362855            | 8.58±0.98  |
| p55 protein                                                                  | LOC652956            | 9.44±1.95  |
| Paf1, RNA polymerase II associated factor, homolog (S. cerevisiae)           | Paf1                 | 0.73±0.11  |
| paired box gene 8                                                            | Pax8                 | 4.94±1     |
| paired-like homeodomain transcription factor 2                               | Pitx2                | 1.73±0.09  |
| PAK1 interacting protein 1                                                   | Pak1ip1              | 0.43±0.16  |
| pallidin                                                                     | Pldn                 | 1.92±0.09  |
| palmitoyl-protein thioesterase 1                                             | Ppt1                 | 1.72±0.22  |
| palmitoyl-protein thioesterase 2                                             | Ppt2                 | 0.83±0.15  |
| PAN3 polyA specific ribonuclease subunit homolog (S. cerevisiae)             | Pan3                 | 1.34±0.07  |
| Pannexin 1                                                                   | Panx1                | 0.26±0.05  |
| panthothenate kinase 1 (predicted)                                           | Pank1_predicted      | 7.27±1.7   |
| panthothenate kinase 2 (Hallervorden-Spatz syndrome) (predicted)             | Pank2_predicted      | 0.61±0.09  |
| panthothenate kinase 3 (predicted)                                           | Pank3_predicted      | 0.37±0.05  |
| panthothenate kinase 4                                                       | Pank4                | 1.06±0.15  |
| PAP associated domain containing 1 (predicted)                               | Papd1_predicted      | 1.52±0.23  |
| PAP associated domain containing 4                                           | Papd4                | 0.8±0.09   |
| PAP associated domain containing 5 (predicted)                               | Papd5_predicted      | 4.35±0.19  |
| papillary renal cell carcinoma (translocation-associated) (predicted)        | Prcc_predicted       | 0.85±0.09  |
| par-6 (partitioning defective 6) homolog beta (C. elegans) (predicted)       | Pard6b_predicted     | 4±0.27     |
| par-6 (partitioning defective 6,) homolog alpha (C. elegans)                 | Pard6a               | 0.41±0.08  |
| paralemmin                                                                   | Palm                 | 2.23±0.56  |
| paraoxonase 2                                                                | Pon2                 | 6.13±0.1   |
| paraoxonase 3                                                                | Pon3                 | 3.2±0.94   |
| paraspeckle protein 1                                                        | Pspc1                | 2±0.12     |
| parathyrosin                                                                 | Ptms                 | 5.51±1.98  |
| parathyroid hormone receptor 1                                               | Pthr1                | 22.6±3.38  |
| Parkinson disease (autosomal recessive, early onset) 7                       | Park7                | 28.39±0.68 |
| partner of NOB1 homolog (S. cerevisiae)                                      | Pno1                 | 1.88±0.19  |
| patatin-like phospholipase domain containing 2 (predicted)                   | Pnpla2_predicted     | 1.82±0.17  |
| patatin-like phospholipase domain containing 6                               | Pnpla6               | 0.25±0.1   |
| patatin-like phospholipase domain containing 7                               | Pnpla7               | 2±0.25     |
| patatin-like phospholipase domain containing 8                               | Pnpla8               | 0.65±0.19  |
| PAX interacting (with transcription-activation domain) protein 1 (predicted) | Paxip1_predicted     | 0.41±0.14  |
| paxillin                                                                     | Pxn                  | 4.55±0.6   |
| PC4 and SFRS1 interacting protein 1                                          | Psip1                | 0.93±0.27  |
| PCTAIRE-motif protein kinase 1                                               | Pctk1                | 0.92±0.11  |
| PCTAIRE-motif protein kinase 2                                               | Pctk2                | 1.45±0.25  |
| PDGFA associated protein 1                                                   | Pdap1                | 4.75±0.57  |
| PDS5, regulator of cohesion maintenance, homolog A (S. cerevisiae)           | Pds5a                | 2.18±0.26  |
| PDS5, regulator of cohesion maintenance, homolog B (S. cerevisiae)           | Pds5b                | 1.09±0.13  |
| PDZ binding kinase (predicted)                                               | Pbk_predicted        | 0.34±0.22  |
| PDZ domain containing 1                                                      | Pdzk1                | 40.44±0.62 |
| PDZ domain containing 11 (predicted)                                         | Pdzd11_predicted     | 2.55±0.44  |
| PDZ domain containing 3                                                      | Pdzd3                | 7.47±0.75  |
| PDZ domain containing 8                                                      | Pdzd8                | 0.75±0.1   |
| PDZ domain containing RING finger 3 (predicted)                              | Pdzrn3_predicted     | 1.53±0.24  |
| PDZK1 interacting protein 1                                                  | Pdzk1ip1             | 28.09±2.55 |
| pecanex homolog (Drosophila)                                                 | Pcnx                 | 2.78±0.36  |
| pecanex-like 3 (Drosophila)                                                  | Pcnx3                | 1.6±0.17   |
| pellino homolog 1 (Drosophila) /// similar to pellino protein (predicted)    | Peli1 ///            | 1.2±0.24   |
| pelota homolog (Drosophila)                                                  | RGD1564594_predicted |            |
| penta-EF hand domain containing 1                                            | Pelo                 | 1.86±0.03  |
| pentatricopeptide repeat domain 1 (predicted)                                | Pef1                 | 2.27±0.09  |
| pentatricopeptide repeat domain 2 (predicted)                                | Ptcd1_predicted      | 2.1±0.21   |
| Pentatricopeptide repeat domain 3                                            | Ptcd2_predicted      | 0.67±0.06  |
| peptidase (mitochondrial processing) alpha                                   | Ptcd3                | 18.08±3.36 |
| peptidase (mitochondrial processing) beta                                    | Pmpca                | 3.83±0.22  |
| peptidylglycine alpha-amidating monooxygenase                                | Pmpcb                | 6.84±0.75  |
| peptidylprolyl isomerase (cyclophilin)-like 1                                | Pam                  | 16.05±0.66 |
| peptidylprolyl isomerase (cyclophilin)-like 2                                | Ppil1                | 0.56±0.07  |
| peptidylprolyl isomerase (cyclophilin)-like 3                                | Ppil2                | 1.68±0.12  |
| peptidylprolyl isomerase (cyclophilin)-like 4 (predicted)                    | Ppil3                | 1.48±0.5   |
| peptidylprolyl isomerase A                                                   | Ppil4_predicted      | 0.4±0.02   |
| peptidylprolyl isomerase B                                                   | Ppia                 | 50.27±1.08 |
| peptidylprolyl isomerase D (cyclophilin D)                                   | Ppib                 | 19.77±1.6  |
| peptidylprolyl isomerase domain and WD repeat containing 1 (predicted)       | Ppid                 | 4.3±0.62   |
| peptidylprolyl isomerase E (cyclophilin E)                                   | Ppwd1_predicted      | 0.28±0.16  |
| peptidylprolyl isomerase F (cyclophilin F)                                   | Ppie                 | 0.51±0.09  |
| peptidyl-tRNA hydrolase 1 homolog (S. cerevisiae) (predicted)                | Ppif                 | 1.29±0.2   |
| Peptidyl-tRNA hydrolase 1 homolog (S. cerevisiae) (predicted)                | Pthr1_predicted      | 0.28±0.07  |
| peptidyl-tRNA hydrolase 2                                                    | Tor2a                | 0.27±0.02  |
| pericentriolar material 1                                                    | Pthr2                | 1.17±0.09  |
| period homolog 2 (Drosophila)                                                | Pcm1                 | 2.11±0.29  |
| periphilin 1 (predicted)                                                     | Per2                 | 2.95±1.09  |
| peroxiredoxin 1                                                              | Pphn1_predicted      | 1.15±0.1   |
|                                                                              | Prdx1                | 40.84±4.27 |

|                                                                                                                               |                      |            |
|-------------------------------------------------------------------------------------------------------------------------------|----------------------|------------|
| peroxiredoxin 2                                                                                                               | Prdx2                | 10.76±1.61 |
| peroxiredoxin 3                                                                                                               | Prdx3                | 18.16±0.86 |
| peroxiredoxin 4                                                                                                               | Prdx4                | 1.22±0.28  |
| peroxiredoxin 5                                                                                                               | Prdx5                | 14.91±0.44 |
| peroxiredoxin 6                                                                                                               | Prdx6                | 7.05±0.35  |
| peroxisomal biogenesis factor 11A                                                                                             | Pex11a               | 3.61±0.28  |
| peroxisomal biogenesis factor 11b                                                                                             | Pex11b               | 1.47±0.07  |
| peroxisomal biogenesis factor 11c (predicted)                                                                                 | Pex11c_predicted     | 0.8±0.09   |
| peroxisomal biogenesis factor 12                                                                                              | Pex12                | 1.74±0.2   |
| peroxisomal biogenesis factor 13 (predicted)                                                                                  | Pex13_predicted      | 8.61±1.05  |
| peroxisomal biogenesis factor 3                                                                                               | Pex3                 | 1.03±0.07  |
| peroxisomal biogenesis factor 6                                                                                               | Pex6                 | 0.66±0.28  |
| peroxisomal delta3, delta2-enoyl-Coenzyme A isomerase                                                                         | Peci                 | 9.51±1.53  |
| peroxisomal delta3, delta2-enoyl-Coenzyme A isomerase /// similar to RIKEN cDNA 1810022C23                                    | Peci /// RGD1310224  | 21.38±2.15 |
| peroxisomal membrane protein 2                                                                                                | Pxmp2                | 5.79±1.03  |
| peroxisomal membrane protein 4                                                                                                | Pxmp4                | 2.99±2.15  |
| peroxisomal trans-2-enoyl-CoA reductase                                                                                       | Pecr                 | 21.69±0.89 |
| peroxisome biogenesis factor 1                                                                                                | Pex1                 | 2.59±0.13  |
| peroxisome biogenesis factor 10                                                                                               | Pex10                | 0.71±0.1   |
| peroxisome biogenesis factor 16                                                                                               | Pex16                | 2.68±0.19  |
| peroxisome biogenesis factor 19                                                                                               | Pex19                | 1.15±0.21  |
| peroxisome biogenesis factor 19 /// similar to Peroxisomal biogenesis factor 19 (Pexin-19) (Peroxisomal farnesylated protein) | LOC679129 /// Pex19  | 3.24±0.14  |
| peroxisome biogenesis factor 2                                                                                                | Pex2                 | 1.37±0.25  |
| peroxisome biogenesis factor 26                                                                                               | Pex26                | 0.79±0.18  |
| peroxisome biogenesis factor 5 (predicted)                                                                                    | Pex5_predicted       | 5.27±0.29  |
| peroxisome biogenesis factor 7                                                                                                | Pex7                 | 2.53±0.12  |
| peroxisome proliferative activated receptor, gamma, coactivator 1 alpha                                                       | Ppargc1a             | 0.92±0.05  |
| peroxisome proliferative activated receptor, gamma, coactivator 1 beta                                                        | Ppargc1b             | 0.54±0.09  |
| PERP, TP53 apoptosis effector (predicted)                                                                                     | Perp_predicted       | 16.99±0.79 |
| PEST proteolytic signal containing nuclear protein                                                                            | Pcnp                 | 3.47±0.4   |
| PET112-like (yeast) (predicted)                                                                                               | Pet112_predicted     | 1.06±0.16  |
| peter pan homolog (Drosophila)                                                                                                | Ppan                 | 0.44±0.12  |
| PFTAIRE protein kinase 1 (predicted)                                                                                          | Ptk1_predicted       | 1.88±0.27  |
| PHD finger protein 12                                                                                                         | Phf12                | 0.47±0.13  |
| PHD finger protein 13 (predicted)                                                                                             | Phf13_predicted      | 0.47±0.16  |
| PHD finger protein 14                                                                                                         | Phf14                | 0.7±0.35   |
| PHD finger protein 17 (predicted)                                                                                             | Phf17_predicted      | 6.15±0.48  |
| PHD finger protein 2 (predicted)                                                                                              | Phf2_predicted       | 0.55±0.21  |
| PHD finger protein 20-like 1                                                                                                  | Phf20l1              | 1.56±0.19  |
| PHD finger protein 3 (predicted)                                                                                              | Phf3_predicted       | 2.28±0.36  |
| PHD finger protein 5A                                                                                                         | Phf5a                | 2.6±0.36   |
| phenazine biosynthesis-like protein domain containing                                                                         | Pbid                 | 19.22±1.68 |
| phenylalanine hydroxylase                                                                                                     | Pah                  | 64.61±2.21 |
| phenylalanine-tRNA synthetase 2 (mitochondrial)                                                                               | Fars2                | 1.3±0.27   |
| Phenylalanine-tRNA synthetase-like, alpha subunit                                                                             | Fars1a               | 1.35±0.16  |
| phenylalanyl-tRNA synthetase, beta subunit                                                                                    | Farsb                | 3.03±0.49  |
| phenylalkylamine Ca2+ antagonist (emopamil) binding protein                                                                   | Ebp                  | 2.11±0.09  |
| phosducin-like                                                                                                                | Pdcl                 | 0.94±0.25  |
| phosducin-like 3                                                                                                              | Pdcl3                | 2.83±0.23  |
| phosphatase and tensin homolog                                                                                                | Pten                 | 1.47±0.16  |
| phosphatase, orphan 2                                                                                                         | Phospho2             | 1.81±0.05  |
| phosphate cytidylyltransferase 1, choline, alpha isoform                                                                      | Pcyt1a               | 2.18±0.11  |
| phosphate cytidylyltransferase 2, ethanolamine                                                                                | Pcyt2                | 2.72±0.52  |
| phosphatidic acid phosphatase type 2 domain containing 1B                                                                     | Ppapdc1b             | 3.63±0.44  |
| phosphatidic acid phosphatase type 2 domain containing 2                                                                      | Ppapdc2              | 2.49±0.43  |
| phosphatidic acid phosphatase type 2B                                                                                         | Ppap2b               | 0.81±1.11  |
| phosphatidic acid phosphatase type 2c                                                                                         | Ppap2c               | 3.12±0.75  |
| phosphatidylcholine transfer protein                                                                                          | Pctp                 | 0.52±0.24  |
| phosphatidylethanolamine binding protein 1                                                                                    | Pebp1                | 25.83±1.09 |
| phosphatidylglycerophosphate synthase 1                                                                                       | Pgs1                 | 0.56±0.14  |
| phosphatidylinositol 3-kinase, C2 domain containing, alpha polypeptide (predicted)                                            | Pik3c2a_predicted    | 5.45±1     |
| Phosphatidylinositol 3-kinase, catalytic, alpha polypeptide                                                                   | Pik3ca               | 4.91±0.21  |
| phosphatidylinositol 3-kinase, catalytic, alpha polypeptide                                                                   | LOC685590 /// Pik3ca | 0.29±0.06  |
| phosphatidylinositol 3-kinase, catalytic, beta polypeptide                                                                    | Pik3cb               | 0.59±0.11  |
| phosphatidylinositol 3-kinase, regulatory subunit, polypeptide 2 (p85 beta)                                                   | Pik3r2               | 1.28±0.15  |
| phosphatidylinositol 4-kinase type 2 alpha                                                                                    | Pi4k2a               | 0.32±0.09  |
| phosphatidylinositol 4-kinase, catalytic, alpha                                                                               | Pi4ka                | 2.04±0.25  |
| phosphatidylinositol 4-kinase, catalytic, beta polypeptide                                                                    | Pi4kb                | 3.14±0.35  |
| Phosphatidylinositol binding clathrin assembly protein                                                                        | Picalm               | 29.75±1.34 |
| phosphatidylinositol glycan anchor biosynthesis, class C                                                                      | Pigc                 | 2.11±0.26  |
| phosphatidylinositol glycan anchor biosynthesis, class L                                                                      | Pigl                 | 0.92±0.05  |
| phosphatidylinositol glycan anchor biosynthesis, class M                                                                      | Pigm                 | 0.49±0.1   |
| phosphatidylinositol glycan anchor biosynthesis, class O                                                                      | Pigo                 | 1.55±0.25  |
| phosphatidylinositol glycan anchor biosynthesis, class P                                                                      | Pigp                 | 17.07±0.71 |
| phosphatidylinositol glycan anchor biosynthesis, class Q                                                                      | Pigq                 | 2.56±0.51  |
| phosphatidylinositol glycan anchor biosynthesis, class S                                                                      | Pigs                 | 1.5±0.07   |
| phosphatidylinositol glycan anchor biosynthesis, class T                                                                      | Pigt                 | 4.45±0.65  |
| phosphatidylinositol glycan anchor biosynthesis, class V                                                                      | Pigv                 | 0.64±0.16  |
| phosphatidylinositol glycan anchor biosynthesis, class X                                                                      | Pigx                 | 4.39±0.1   |
| phosphatidylinositol glycan anchor biosynthesis, class Y                                                                      | Pigy                 | 5.52±0.31  |
| phosphatidylinositol glycan, class K /// ubiquitin specific peptidase 33                                                      | Pigk /// Usp33       | 4.81±0.44  |
| phosphatidylinositol transfer protein, alpha                                                                                  | Pitpna               | 3.62±1.21  |
| phosphatidylinositol transfer protein, beta                                                                                   | Pitpnb               | 4.91±0.22  |
| phosphatidylinositol transfer protein, membrane-associated 1                                                                  | Pitpnm1              | 0.62±0.27  |
| phosphatidylinositol-3-phosphate/phosphatidylinositol 5-kinase, type III                                                      | Pip5k3               | 0.39±0.07  |
| phosphatidylinositol-4-phosphate 5-kinase, type 1, alpha (predicted)                                                          | Pip5k1a_predicted    | 0.29±0.08  |
| phosphatidylinositol-4-phosphate 5-kinase, type 1, beta                                                                       | Pip5k1b              | 0.64±0.13  |

|                                                                                                      |                    |            |
|------------------------------------------------------------------------------------------------------|--------------------|------------|
| phosphatidylinositol-4-phosphate 5-kinase, type I, gamma                                             | Pip5k1c            | 2.8±0.35   |
| phosphatidylinositol-5-phosphate 4-kinase, type II, alpha                                            | Pip4k2a            | 0.59±0.21  |
| phosphatidylinositol-5-phosphate 4-kinase, type II, gamma                                            | Pip4k2c            | 3.57±0.21  |
| phosphatidylserine decarboxylase                                                                     | Pisd               | 0.7±0.1    |
| phosphatidylserine synthase 1                                                                        | Ptdss1             | 2.7±0.66   |
| phosphatidylserine synthase 2 (predicted)                                                            | Ptdss2_predicted   | 2.77±0.75  |
| phosphodiesterase 3B, cGMP-inhibited                                                                 | Pde3b              | 1.09±0.19  |
| phosphodiesterase 4D interacting protein (myomegalin)                                                | Pde4dip            | 1.32±0.32  |
| phosphodiesterase 6D, cGMP-specific, rod, delta (predicted)                                          | Pde6d_predicted    | 1.89±0.19  |
| phosphodiesterase 7A                                                                                 | Pde7a              | 2.4±0.29   |
| Phosphodiesterase 8A                                                                                 | Pde8a              | 0.87±0.27  |
| phosphoenolpyruvate carboxykinase 1, cytosolic                                                       | Pck1               | 57.23±2.35 |
| phosphoenolpyruvate carboxykinase 2 (mitochondrial) (predicted)                                      | Pck2_predicted     | 1.11±0.27  |
| phosphofructokinase, liver, B-type                                                                   | Pfkl               | 1.18±0.35  |
| phosphofructokinase, muscle                                                                          | Pfkm               | 1.76±0.15  |
| phosphoglucomutase 1                                                                                 | Pgm1               | 3.97±0.7   |
| phosphoglucomutase 5 (predicted) /// similar to phosphoglucomutase 5                                 | LOC687552 ///      | 0.51±0.03  |
|                                                                                                      | Pgm5_predicted     |            |
| phosphoglycerate dehydrogenase like 1                                                                | Phgdh1             | 2.47±0.33  |
| phosphoglycerate kinase 1                                                                            | Pgk1               | 42.88±0.53 |
| phosphoglycerate mutase 1                                                                            | Pgam1              | 38.59±1.6  |
| phosphoglycerate mutase family member 5                                                              | Pgam5              | 2.9±0.13   |
| phosphohistidine phosphatase 1 (predicted)                                                           | Phpt1_predicted    | 8.28±1.09  |
| Phosphoinositide-3-kinase adaptor protein 1 (predicted)                                              | Pik3ap1_predicted  | 1.26±0.41  |
| phosphoinositide-3-kinase, class 3                                                                   | Pik3c3             | 0.76±0.11  |
| phosphoinositide-3-kinase, regulatory subunit 4, p150 (predicted)                                    | Pik3r4_predicted   | 1.84±0.2   |
| phospholipase A2, activating protein                                                                 | Plaa               | 1.96±0.36  |
| phospholipase A2, group VI                                                                           | Pla2q6             | 0.69±0.5   |
| phospholipase A2, group XIIA (predicted)                                                             | Pla2g12a_predicted | 1.19±0.08  |
| phospholipase C, beta 1                                                                              | Plcb1              | 7.53±0.91  |
| phospholipase C, gamma 1                                                                             | Plcg1              | 1.06±0.42  |
| phospholipase C-like 1                                                                               | Plcl1              | 6.91±0.61  |
| phospholipase D family, member 3                                                                     | Pld3               | 1.16±0.14  |
| phospholipid scramblase 1                                                                            | Plscr1             | 0.8±0.16   |
| phospholipid scramblase 2                                                                            | Plscr2             | 15.28±0.73 |
| phospholipid scramblase 3                                                                            | Plscr3             | 0.43±0.26  |
| Phospholipid transfer protein (predicted)                                                            | Pltp_predicted     | 4.04±0.57  |
| phospholysine phosphohistidine inorganic pyrophosphate phosphatase                                   | Lhpp               | 4.76±0.64  |
| phosphomannomutase 1                                                                                 | Pmm1               | 0.42±0.18  |
| phosphomannomutase 2 (predicted)                                                                     | Pmm2_predicted     | 2.75±0.37  |
| phosphomevalonate kinase                                                                             | Pmvk               | 0.46±0.31  |
| phosphopantothienoylcysteine decarboxylase (predicted)                                               | Ppcdc_predicted    | 0.29±0.1   |
| phosphopantothienoylcysteine synthetase                                                              | Ppcs               | 3.42±0.53  |
| phosphoribosyl pyrophosphate amidotransferase                                                        | Ppat               | 1.22±0.06  |
| phosphoribosyl pyrophosphate synthetase 1                                                            | Prps1              | 1.83±0.56  |
| phosphoribosyl pyrophosphate synthetase 2                                                            | Prps2              | 3.38±0.6   |
| phosphoribosyl pyrophosphate synthetase-associated protein 1                                         | Prpsap1            | 3.26±0.33  |
| phosphoribosyl pyrophosphate synthetase-associated protein 2                                         | Prpsap2            | 3.73±0.72  |
| phosphoribosylaminoimidazole carboxylase, phosphoribosylaminoimidazole succinocarboxamide synthetase | Paics              | 10.54±1.22 |
| phosphoribosylformylglycinamide synthase (FGAR amidotransferase) (predicted)                         | Pfas_predicted     | 0.49±0.38  |
| phosphoribosylglycinamide formyltransferase                                                          | Gart               | 1.01±0.11  |
| Phosphorylase kinase alpha 1                                                                         | Phka1              | 0.62±0.06  |
| phosphorylase kinase, gamma 2 (testis)                                                               | Phkg2              | 2.02±0.25  |
| phosphoserine aminotransferase 1                                                                     | Psat1              | 42.59±1.08 |
| phosphoserine phosphatase                                                                            | Psph               | 15.52±1.32 |
| phosphotriesterase related                                                                           | Pter               | 16.84±2.89 |
| phytanoyl-CoA dioxygenase domain containing 1                                                        | Phyhd1             | 18.9±1.63  |
| Phytanoyl-CoA hydroxylase                                                                            | Phyh               | 15.85±2.14 |
| Phytn_dehydro and Pyr_redox domain containing protein RGD1303232                                     | RGD1303232         | 27.3±4.46  |
| phytoceramidase, alkaline                                                                            | Phca               | 0.79±0.13  |
| PIH1 domain containing 1                                                                             | Pih1d1             | 0.99±0.1   |
| PIN2-interacting protein 1                                                                           | Pinx1              | 0.37±0.11  |
| pinin                                                                                                | Pnn                | 1.93±0.61  |
| pitrilysin metallepetidase 1 (predicted)                                                             | Pitrm1_predicted   | 5.06±0.56  |
| pituitary tumor-transforming 1 interacting protein                                                   | Pttg1ip            | 21.27±0.97 |
| placenta-specific 8 (predicted)                                                                      | Plac8_predicted    | 16.76±0.71 |
| plakophilin 2                                                                                        | Pkp2               | 1.3±0.18   |
| plakophilin 3 (predicted)                                                                            | Pkp3_predicted     | 0.44±0.25  |
| plakophilin 4 (predicted)                                                                            | Pkp4_predicted     | 5.54±1.13  |
| plasma glutamate carboxypeptidase                                                                    | Pgcp               | 26.16±2.57 |
| plasma membrane proteolipid                                                                          | Plip               | 17.01±1.79 |
| plasminogen activator, urokinase                                                                     | Plau               | 28.96±2.89 |
| plastin 1 (I isoform) (predicted)                                                                    | Pls1_predicted     | 5±0.31     |
| platelet derived growth factor receptor, alpha polypeptide                                           | Pdgfra             | 1.3±0.35   |
| platelet derived growth factor, alpha                                                                | Pdgfa              | 1.49±0.07  |
| platelet-activating factor acetylhydrolase, isoform 1b, alpha1 subunit                               | Pafah1b3           | 1.05±0.14  |
| platelet-activating factor acetylhydrolase, isoform 1b, alpha2 subunit                               | Pafah1b2           | 2.52±0.52  |
| platelet-activating factor acetylhydrolase, isoform 1b, alpha subunit 45kDa                          | Pafah1b1           | 3.51±0.13  |
| platelet-activating factor receptor                                                                  | Ptafr              | 0.32±0.27  |
| platelet-derived growth factor, C polypeptide                                                        | Pdgfc              | 1.19±0.09  |
| pleckstrin homology domain containing, family A (phosphoinositide binding specific) member 1         | Plekha1            | 6.3±0.2    |
| pleckstrin homology domain containing, family A (phosphoinositide binding specific) member 8         | Plekha8            | 0.34±0.06  |
| Pleckstrin homology domain containing, family A member 5                                             | Plekha5            | 1.23±0.25  |
| pleckstrin homology domain containing, family A member 6 (predicted)                                 | Plekha6_predicted  | 1.79±0.01  |
| pleckstrin homology domain containing, family B (evectins) member 1                                  | Plekhb1            | 0.27±0.06  |
| pleckstrin homology domain containing, family B (evectins) member 2 (predicted)                      | Plekhb2_predicted  | 24.04±3.26 |
| pleckstrin homology domain containing, family C (with FERM domain) member 1                          | Plekhc1            | 2.33±0.49  |

|                                                                                              |                                                         |            |
|----------------------------------------------------------------------------------------------|---------------------------------------------------------|------------|
| pleckstrin homology domain containing, family F (with FYVE domain) member 1                  | Plekhf1                                                 | 0.48±0.14  |
| pleckstrin homology domain containing, family F (with FYVE domain) member 2 (predicted)      | Plekhf2_predicted                                       | 10.31±1.16 |
| pleckstrin homology domain containing, family G (with RhoGef domain) member 3                | Plekhg3                                                 | 2.85±0.1   |
| pleckstrin homology domain containing, family H (with MyTH4 domain) member 1 (predicted)     | Plekhhh1_predicted                                      | 0.55±0.24  |
| pleckstrin homology domain containing, family J member 1                                     | Plekhj1                                                 | 1.5±0.62   |
| pleckstrin homology domain-containing, family A (phosphoinositide binding specific) member 3 | Plekha3                                                 | 2.59±0.2   |
| pleckstrin homology, Sec7 and coiled-coil domains 2                                          | Pscd2                                                   | 2.15±0.12  |
| pleckstrin homology-like domain, family A, member 2 (predicted)                              | Phlda2_predicted                                        | 0.31±0.12  |
| pleckstrin homology-like domain, family B, member 2                                          | Phldb2                                                  | 2.54±0.2   |
| pleiomorphic adenoma gene-like 1                                                             | Plaql1                                                  | 0.51±0.53  |
| pleiotropic regulator 1, PRL1 homolog (Arabidopsis)                                          | Plrg1                                                   | 3.2±1.05   |
| plexin A2 (predicted)                                                                        | Plxna2_predicted                                        | 0.38±0.1   |
| plexin B2                                                                                    | Plxnb2                                                  | 4.73±0.54  |
| plexin domain containing 2 (predicted)                                                       | Plxdc2_predicted                                        | 0.9±0.25   |
| podoplanin                                                                                   | Pdpn                                                    | 0.63±0.27  |
| pogo transposable element with KRAB domain (predicted)                                       | Pogk_predicted                                          | 0.22±0.06  |
| pogo transposable element with ZNF domain (predicted)                                        | Pogz_predicted                                          | 0.42±0.06  |
| Poliovirus receptor-related 3 (predicted)                                                    | Pvrl3_predicted                                         | 4.2±0.22   |
| poly (A) polymerase alpha (predicted)                                                        | Papola_predicted                                        | 2.88±0.42  |
| poly (ADP-ribose) glycohydrolase                                                             | Parq                                                    | 6.59±0.46  |
| poly (ADP-ribose) polymerase family, member 1                                                | Parp1                                                   | 3.67±0.15  |
| poly (ADP-ribose) polymerase family, member 12 (predicted)                                   | Parp12_predicted                                        | 0.65±0.12  |
| poly (ADP-ribose) polymerase family, member 16                                               | Parp16                                                  | 2.68±0.57  |
| poly (ADP-ribose) polymerase family, member 2 (predicted)                                    | Parp2_predicted                                         | 0.73±0.09  |
| poly (ADP-ribose) polymerase family, member 9 (predicted)                                    | Parp9_predicted                                         | 0.31±0.06  |
| poly A binding protein, cytoplasmic 4                                                        | Pabpc4                                                  | 5.7±0.22   |
| poly(A) binding protein, cytoplasmic 1                                                       | Pabpc1                                                  | 13.52±1.61 |
| poly(A) polymerase gamma (predicted)                                                         | Papolg_predicted                                        | 0.36±0.21  |
| poly(A)-specific ribonuclease (deadenylation nuclease)                                       | Parn                                                    | 0.61±0.11  |
| poly(rC) binding protein 1                                                                   | Pcbp1                                                   | 14.4±0.86  |
| poly(rC) binding protein 2                                                                   | Pcbp2                                                   | 10.8±2.21  |
| poly(rC) binding protein 3                                                                   | Pcbp3                                                   | 0.61±0.16  |
| poly(rC) binding protein 4 (predicted)                                                       | Pcbp4_predicted                                         | 2.3±0.64   |
| polyadenylate binding protein-interacting protein 1 (predicted)                              | Paip1_predicted                                         | 4.27±0.48  |
| polyadenylate-binding protein interacting protein 2                                          | Paip2                                                   | 9.67±0.9   |
| polyamine modulated factor 1 binding protein 1                                               | Pmfbp1                                                  | 0.75±0.14  |
| polyamine-modulated factor 1                                                                 | Pmf1                                                    | 0.23±0.18  |
| polybromo 1                                                                                  | Pbrm1                                                   | 3.41±0.21  |
| polycomb group ring finger 1                                                                 | Pcgf1                                                   | 0.58±0.17  |
| polycomb group ring finger 2 (predicted)                                                     | Pcgf2_predicted                                         | 0.29±0.02  |
| polycomb group ring finger 3                                                                 | Pcgf3                                                   | 0.58±0.01  |
| Polycomb group ring finger 4 (predicted)                                                     | Pcgf4_predicted                                         | 3.41±0.19  |
| polycomb group ring finger 5 /// similar to polycomb group ring finger 5                     | LOC687730 /// Pcgf5                                     | 1.4±0.2    |
| polycomb group ring finger 6                                                                 | Pcgf6                                                   | 1.05±0.12  |
| polyglutamine binding protein 1                                                              | Pqbp1                                                   | 1.02±0.17  |
| polyhomeotic-like 1 (Drosophila) (predicted)                                                 | Phc1_predicted                                          | 0.52±0.18  |
| polyhomeotic-like 2 (Drosophila)                                                             | Phc2                                                    | 0.76±0.24  |
| polymerase (DNA directed) sigma (predicted)                                                  | Pols_predicted                                          | 0.74±0.06  |
| Polymerase (DNA directed), alpha 1                                                           | Pola1                                                   | 1.4±0.02   |
| polymerase (DNA directed), beta                                                              | Polb                                                    | 1.08±0.13  |
| polymerase (DNA directed), delta 2, regulatory subunit                                       | Pold2                                                   | 0.39±0.04  |
| polymerase (DNA directed), epsilon 3 (p17 subunit)                                           | Pole3                                                   | 2.91±0.44  |
| polymerase (DNA directed), gamma                                                             | Polg                                                    | 1.92±0.09  |
| polymerase (DNA directed), gamma 2, accessory subunit (predicted)                            | Polg2_predicted                                         | 3.71±0.23  |
| polymerase (DNA directed), lambda                                                            | Poll                                                    | 0.78±0.14  |
| polymerase (DNA directed), mu                                                                | Polm                                                    | 0.53±0.07  |
| polymerase (DNA-directed), delta 3, accessory subunit                                        | Pold3                                                   | 0.23±0.12  |
| polymerase (DNA-directed), delta 4                                                           | Pold4                                                   | 3.03±0.61  |
| polymerase (DNA-directed), delta interacting protein 2 (predicted)                           | Poldip2_predicted                                       | 3.6±0.09   |
| polymerase (DNA-directed), delta interacting protein 3 (predicted)                           | Poldip3_predicted                                       | 0.82±0.18  |
| polymerase (DNA-directed), epsilon 4 (p12 subunit) (predicted)                               | Pole4_predicted                                         | 4.66±1.33  |
| polymerase (RNA) I polypeptide E                                                             | Polr1e                                                  | 0.49±0.08  |
| polymerase (RNA) II (DNA directed) polypeptide A                                             | Polr2a                                                  | 1.53±0.21  |
| polymerase (RNA) II (DNA directed) polypeptide B (predicted)                                 | Polr2b_predicted                                        | 3.95±0.53  |
| polymerase (RNA) II (DNA directed) polypeptide C                                             | Polr2c                                                  | 1.78±0.52  |
| polymerase (RNA) II (DNA directed) polypeptide C /// similar to RIKEN cDNA 2310005O14        | LOC498909 /// Polr2c                                    | 15.02±1.38 |
| polymerase (RNA) II (DNA directed) polypeptide D (predicted)                                 | Polr2d_predicted                                        | 3.93±0.12  |
| polymerase (RNA) II (DNA directed) polypeptide E                                             | Polr2e                                                  | 3.81±0.66  |
| polymerase (RNA) II (DNA directed) polypeptide F                                             | Polr2f                                                  | 2.93±0.24  |
| polymerase (RNA) II (DNA directed) polypeptide G                                             | Polr2g                                                  | 5.2±0.32   |
| polymerase (RNA) II (DNA directed) polypeptide H (predicted)                                 | Polr2h /// Polr2h_predicted<br>/// RGD1565904_predicted | 1.19±0.49  |
| polymerase (RNA) II (DNA directed) polypeptide I (predicted)                                 | Polr2i_predicted                                        | 1.51±0.05  |
| polymerase (RNA) II (DNA directed) polypeptide J (predicted)                                 | Polr2j_predicted                                        | 4.29±0.39  |
| polymerase (RNA) III (DNA directed) polypeptide A                                            | Polr3a                                                  | 1.19±0.23  |
| polymerase (RNA) III (DNA directed) polypeptide C                                            | Polr3c                                                  | 0.76±0.15  |
| polymerase (RNA) III (DNA directed) polypeptide D                                            | Polr3d                                                  | 1.61±0.21  |
| polymerase (RNA) III (DNA directed) polypeptide E (predicted)                                | Polr3e_predicted                                        | 0.47±0.08  |
| polymerase (RNA) III (DNA directed) polypeptide F (predicted)                                | Polr3f_predicted                                        | 0.5±0.17   |
| polymerase (RNA) III (DNA directed) polypeptide G                                            | Polr3g                                                  | 4.83±0.38  |
| polymerase (RNA) III (DNA directed) polypeptide H (predicted)                                | Polr3h_predicted                                        | 0.66±0.17  |
| polymerase (RNA) III (DNA directed) polypeptide K                                            | Polr3k                                                  | 1.85±0.41  |
| polymerase (RNA) mitochondrial (DNA directed) (predicted)                                    | Polrmt_predicted                                        | 1.65±0.21  |
| polynucleotide kinase 3'-phosphatase                                                         | Pnkp                                                    | 0.77±0.13  |
| polypyrimidine tract binding protein 1                                                       | Ptbp1                                                   | 4.98±0.3   |
| polypyrimidine tract binding protein 2                                                       | Ptbp2                                                   | 0.28±0.11  |

|                                                                                                             |                    |            |
|-------------------------------------------------------------------------------------------------------------|--------------------|------------|
| polyribonucleotide nucleotidyltransferase 1                                                                 | Pnpt1              | 4.84±0.35  |
| postmeiotic segregation increased 1 (S. cerevisiae)                                                         | Pms1               | 0.67±0.09  |
| postmeiotic segregation increased 2 (S. cerevisiae) (predicted)                                             | Pms2_predicted     | 0.32±0.08  |
| potassium channel tetramerisation domain containing 13                                                      | Kctd13             | 0.34±0.09  |
| potassium channel tetramerisation domain containing 15                                                      | Kctd15             | 0.6±0.12   |
| potassium channel tetramerisation domain containing 2                                                       | Kctd2              | 0.9±0.26   |
| potassium channel tetramerisation domain containing 3                                                       | Kctd3              | 1.55±0.17  |
| potassium channel tetramerisation domain containing 5 (predicted)                                           | Kctd5_predicted    | 5.73±0.27  |
| potassium channel tetramerisation domain containing 6 (predicted)                                           | Kctd6_predicted    | 3.09±0.29  |
| potassium channel tetramerisation domain containing 9 (predicted)                                           | Kctd9_predicted    | 2.71±0.32  |
| potassium channel, subfamily K, member 5                                                                    | Kcnk5              | 2.88±0.25  |
| potassium inwardly-rectifying channel, subfamily J, member 12                                               | Kcnj12             | 1.58±0.08  |
| potassium inwardly-rectifying channel, subfamily J, member 15                                               | Kcnj15             | 1.72±0.07  |
| potassium inwardly-rectifying channel, subfamily J, member 16                                               | Kcnj16             | 24.44±2.66 |
| potassium inwardly-rectifying channel, subfamily J, member 3                                                | Kcnj3              | 0.3±0.04   |
| potassium voltage gated channel, Shab-related subfamily, member 1                                           | Kcnnb1             | 0.71±0.07  |
| potassium voltage gated channel, Shaw-related subfamily, member 3                                           | Kcnc3              | 0.31±0.07  |
| potassium voltage-gated channel, shaker-related subfamily, member 2                                         | Kcna2              | 0.26±0.01  |
| POU domain, class 2, transcription factor 1                                                                 | Pou2f1             | 0.27±0.04  |
| PP3111 protein                                                                                              | Pp3111             | 2.75±0.33  |
| PQ loop repeat containing 1                                                                                 | Pqlc1              | 10.07±1.17 |
| PQ loop repeat containing 2 (predicted)                                                                     | Pqlc2_predicted    | 0.66±0.23  |
| PR domain containing 15 (predicted)                                                                         | Prdm15_predicted   | 0.59±0.25  |
| PRA1 domain family 2 (predicted)                                                                            | Praf2_predicted    | 0.8±0.16   |
| praja 2, RING-H2 motif containing                                                                           | Pja2               | 3.32±0.12  |
| pre-B-cell colony enhancing factor 1                                                                        | Pbef1              | 2.04±0.51  |
| pre-B-cell leukemia transcription factor 2                                                                  | Pbx2               | 0.87±0.33  |
| pre-B-cell leukemia transcription factor interacting protein 1                                              | Pbxip1             | 0.54±0.23  |
| prefoldin 1 (predicted)                                                                                     | Pfdn1_predicted    | 6.28±0.08  |
| prefoldin 2                                                                                                 | Pfdn2              | 5.09±0.07  |
| prefoldin 5 (predicted)                                                                                     | Pfdn5_predicted    | 6.59±0.51  |
| pregnancy specific beta-1-glycoprotein 4                                                                    | Psq4               | 0.36±0.02  |
| pregnancy-zone protein                                                                                      | Pzp                | 27.97±4.02 |
| PRELI domain containing 1                                                                                   | Preli1             | 15.34±1.46 |
| pre-mRNA processing factor 8                                                                                | Prpf8              | 4.4±0.18   |
| prenyl (solanesyl) diphosphate synthase, subunit 2                                                          | Pdss2              | 0.79±0.08  |
| Prenylated SNARE protein                                                                                    | Ykt6               | 1.07±0.49  |
| prenylcysteine oxidase 1                                                                                    | Pcyox1             | 2.34±0.12  |
| presenilin 1                                                                                                | Psen1              | 1.81±0.27  |
| presenilin 2                                                                                                | Psen2              | 0.33±0.14  |
| presenilin 2 /// chaperone, ABC1 activity of bc1 complex like (S. pombe)                                    | Cabc1 /// Psen2    | 5.05±1.15  |
| presenilin associated, rhomboid-like                                                                        | Parl               | 2.85±0.2   |
| presenilin enhancer 2 homolog (C. elegans)                                                                  | Psenen             | 6.96±0.83  |
| prickle homolog 4 (Drosophila)                                                                              | Prickle4           | 9.12±0.64  |
| prickle-like 1 (Drosophila)                                                                                 | Prickle1           | 0.54±0.03  |
| prickle-like 2 (Drosophila) (predicted)                                                                     | Prickle2_predicted | 0.33±0.03  |
| prion protein interacting protein 1                                                                         | Prnpip1            | 1.51±0.34  |
| PRKC, apoptosis, WT1, regulator                                                                             | Pawr               | 1.85±0.16  |
| Prkr interacting protein 1 (IL11 inducible)                                                                 | Prkrip1            | 0.29±0.16  |
| processing of precursor 4, ribonuclease P/MRP family, (S. cerevisiae)                                       | Pop4               | 0.94±0.12  |
| processing of precursor 5, ribonuclease P/MRP family (S. cerevisiae) (predicted)                            | Pop5_predicted     | 1.14±0.17  |
| processing of precursor 7, ribonuclease P family, (S. cerevisiae) (predicted)                               | Pop7_predicted     | 1.07±0.13  |
| procollagen, type IV, alpha 1 /// procollagen, type IV, alpha 2 (predicted)                                 | Col4a1 ///         | 12.34±1.1  |
| procollagen, type IV, alpha 2 (predicted)                                                                   | Col4a2_predicted   | 2.89±1.12  |
| procollagen, type IV, alpha 3 (Goodpasture antigen) binding protein (predicted)                             | Col4a2_predicted   | 3.76±0.44  |
| procollagen, type IV, alpha 4                                                                               | Col4a3bp_predicted | 2.08±0.08  |
| procollagen, type IX, alpha 1                                                                               | Col4a4             | 2.08±0.08  |
| procollagen, type XVIII, alpha 1                                                                            | Col9a1             | 0.73±0.26  |
| Procollagen, type XXVII, alpha 1                                                                            | Col18a1            | 0.74±0.29  |
| procollagen-lysine, 2-oxoglutarate 5-dioxygenase 1                                                          | Col27a1            | 1.02±0.69  |
| procollagen-lysine, 2-oxoglutarate 5-dioxygenase 3                                                          | Plod1              | 2.55±0.28  |
| procollagen-proline, 2-oxoglutarate 4-dioxygenase (proline 4-hydroxylase), alpha 1 polypeptide              | Plod3              | 1.14±0.07  |
| procollagen-proline, 2-oxoglutarate 4-dioxygenase (proline 4-hydroxylase), alpha II polypeptide (predicted) | P4ha1              | 4.14±1.09  |
| profilin 1                                                                                                  | P4ha2_predicted    | 0.31±0.05  |
| progesterone receptor membrane component 1                                                                  | Pfn1               | 9.12±1.58  |
| progesterone receptor membrane component 2                                                                  | Pgrmc1             | 46.48±2.88 |
| progesterin and adipoQ receptor family member IX (predicted)                                                | Pgrmc2             | 3.75±0.17  |
| progesterin and adipoQ receptor family member V                                                             | Paqr9_predicted    | 3.15±0.66  |
| progesterin induced protein                                                                                 | Paqr5              | 6.22±1.12  |
| programmed cell death 10                                                                                    | Dd5                | 6.35±0.54  |
| programmed cell death 2                                                                                     | Pdcd10             | 7.18±0.87  |
| programmed cell death 4                                                                                     | Pdcd2              | 1.38±0.14  |
| programmed cell death 5 (predicted)                                                                         | Pdcd4              | 0.75±0.34  |
| programmed cell death 6 (predicted)                                                                         | Pdcd5_predicted    | 4.12±0.58  |
| programmed cell death 6 interacting protein                                                                 | Pdcd6_predicted    | 7.11±0.53  |
| programmed cell death protein 11 (predicted)                                                                | Pdcd6ip            | 5.28±0.18  |
| programmed cell death protein 7 (predicted)                                                                 | Pdcd11_predicted   | 0.52±0.14  |
| progressive ankylosis                                                                                       | Pdcd7_predicted    | 2.77±0.33  |
| Progressive ankylosis homolog (mouse)                                                                       | Ank                | 0.45±0.1   |
| progressive external ophthalmoplegia 1 (human)                                                              | Ank                | 0.34±0.16  |
| prohibitin                                                                                                  | Peo1               | 0.54±0.09  |
| prohibitin 2                                                                                                | Phb                | 8.24±0.45  |
| prolactin receptor                                                                                          | Phb2               | 15.15±1.08 |
| prolactin regulatory element binding                                                                        | Prlr               | 5.93±1.68  |
| proliferating cell nuclear antigen                                                                          | Preb               | 3.31±0.34  |
| proliferation-associated 2G4                                                                                | Pcna               | 7.94±0.6   |
|                                                                                                             | Pa2g4              | 1.07±0.52  |



|                                                                                                 |                      |            |
|-------------------------------------------------------------------------------------------------|----------------------|------------|
| proline dehydrogenase (oxidase) 2                                                               | Prodh2               | 26.24±2.6  |
| proline rich 13                                                                                 | Prr13                | 0.98±0.7   |
| proline rich 14                                                                                 | Prr14                | 0.59±0.22  |
| proline rich 5 (renal)                                                                          | Prr5                 | 1.95±0.64  |
| proline synthetase co-transcribed (predicted)                                                   | Prosc_predicted      | 19.57±0.09 |
| proline, glutamic acid and leucine rich protein 1                                               | Pelp1                | 0.28±0.11  |
| proline/serine-rich coiled-coil 2                                                               | Psrc2                | 0.71±0.18  |
| proline-rich nuclear receptor coactivator 1                                                     | Pnrc1                | 2.13±1.25  |
| proline-rich nuclear receptor coactivator 2                                                     | Pnrc2                | 8.19±0.55  |
| proline-rich polypeptide 3                                                                      | Prr3                 | 0.88±0.14  |
| proline-rich polypeptide 6                                                                      | Prr6                 | 0.83±0.19  |
| proline-rich transmembrane protein 1 /// similar to NG5 protein                                 | LOC683953 /// Prrt1  | 0.23±0.12  |
| prolyl 4-hydroxylase, beta polypeptide                                                          | P4hb                 | 15.88±2.8  |
| prolyl endopeptidase-like                                                                       | Prepl                | 0.85±0.16  |
| promethin                                                                                       | LOC378467            | 3.56±0.36  |
| prominin 1                                                                                      | Prom1                | 3.34±1.02  |
| propionyl coenzyme A carboxylase, beta polypeptide                                              | Pccb                 | 11.99±0.23 |
| propionyl-coenzyme A carboxylase, alpha polypeptide                                             | Pcca                 | 8.83±0.62  |
| proprotein convertase subtilisin/kexin type 1 inhibitor                                         | Pcsk1n               | 1.58±0.32  |
| proprotein convertase subtilisin/kexin type 7                                                   | Pcsk7                | 0.78±0.15  |
| proprotein convertase subtilisin/kexin type 9                                                   | Pcsk9                | 0.45±0.26  |
| prosaposin                                                                                      | Psap                 | 10.32±1.46 |
| prostaglandin D2 synthase (brain)                                                               | Ptgds                | 7.13±1.67  |
| Prostaglandin E receptor 3 (subtype EP3)                                                        | Ptger3               | 0.66±0.36  |
| prostaglandin E synthase 2 (predicted)                                                          | Ptges2_predicted     | 4.95±0.56  |
| prostaglandin E synthase 3 (cytosolic) (predicted)                                              | Ptges3_predicted     | 15.54±0.44 |
| prostate tumor over expressed gene 1                                                            | Ptov1                | 2.85±0.95  |
| protease (prosome, macropain) 26S subunit, ATPase 1                                             | Psmc1                | 3.14±0.41  |
| protease (prosome, macropain) 26S subunit, ATPase 5                                             | Psmc5                | 3.95±0.97  |
| protease, serine, 8 (prostasin)                                                                 | Prss8                | 11.31±0.73 |
| proteasome (prosome, macropain) 28 subunit, 3                                                   | Psmc3                | 4.07±0.22  |
| proteasome (prosome, macropain) 26S subunit, ATPase 2                                           | Psmc2                | 12.39±2.01 |
| proteasome (prosome, macropain) 26S subunit, ATPase 3                                           | Psmc3                | 4.57±0.38  |
| proteasome (prosome, macropain) 26S subunit, ATPase 3, interacting protein                      | Psmc3ip              | 0.39±0.15  |
| proteasome (prosome, macropain) 26S subunit, ATPase, 4                                          | Psmc4                | 4.88±0.3   |
| proteasome (prosome, macropain) 26S subunit, ATPase, 6                                          | Psmc6                | 4.18±0.89  |
| proteasome (prosome, macropain) 26S subunit, ATPase, 6 /// similar to Psmc6 protein (predicted) | Psmc6 ///            | 1.01±0.16  |
|                                                                                                 | RGD1559647_predicted |            |
| proteasome (prosome, macropain) 26S subunit, non-ATPase, 1                                      | Psm1                 | 3.24±0.35  |
| proteasome (prosome, macropain) 26S subunit, non-ATPase, 11 (predicted)                         | Psm11_predicted      | 7.92±1.06  |
| proteasome (prosome, macropain) 26S subunit, non-ATPase, 12                                     | Psm12                | 5.29±0.54  |
| proteasome (prosome, macropain) 26S subunit, non-ATPase, 13 (predicted)                         | Psm13_predicted      | 3.22±0.4   |
| proteasome (prosome, macropain) 26S subunit, non-ATPase, 14                                     | Psm14                | 4.21±0.55  |
| proteasome (prosome, macropain) 26S subunit, non-ATPase, 2                                      | Psm2                 | 10.39±0.78 |
| proteasome (prosome, macropain) 26S subunit, non-ATPase, 3                                      | Psm3                 | 2.6±0.3    |
| proteasome (prosome, macropain) 26S subunit, non-ATPase, 4                                      | Psm4                 | 2.72±0.15  |
| proteasome (prosome, macropain) 26S subunit, non-ATPase, 5 (predicted)                          | Psm5_predicted       | 3.61±0.11  |
| proteasome (prosome, macropain) 26S subunit, non-ATPase, 6                                      | Psm6                 | 7.88±1.72  |
| proteasome (prosome, macropain) 26S subunit, non-ATPase, 7 (predicted)                          | Psm7_predicted       | 3.27±0.44  |
| proteasome (prosome, macropain) 26S subunit, non-ATPase, 8                                      | Psm8                 | 4.81±0.37  |
| proteasome (prosome, macropain) 26S subunit, non-ATPase, 9                                      | Psm9                 | 1.69±0.35  |
| proteasome (prosome, macropain) 28 subunit, alpha                                               | Psm1                 | 2.88±0.84  |
| proteasome (prosome, macropain) 28 subunit, beta                                                | Psm2                 | 2.36±0.27  |
| proteasome (prosome, macropain) activator subunit 4                                             | Psm4                 | 5.78±0.89  |
| proteasome (prosome, macropain) subunit, alpha type 1                                           | Psm1                 | 6.81±1.57  |
| proteasome (prosome, macropain) subunit, alpha type 2                                           | Psm2                 | 8.89±2.74  |
| proteasome (prosome, macropain) subunit, alpha type 3 /// proteasome subunit alpha type 3-like  | Psm3 /// Psma3l      | 11.48±1.37 |
| proteasome (prosome, macropain) subunit, alpha type 4                                           | Psm4                 | 3.85±0.41  |
| proteasome (prosome, macropain) subunit, alpha type 5                                           | Psm5                 | 8.36±0.29  |
| proteasome (prosome, macropain) subunit, alpha type 6                                           | Psm6                 | 17.81±1.15 |
| proteasome (prosome, macropain) subunit, alpha type 7                                           | Psm7                 | 9.63±0.53  |
| proteasome (prosome, macropain) subunit, beta type 1                                            | Psm1                 | 11.02±0.21 |
| proteasome (prosome, macropain) subunit, beta type 2                                            | Psm2                 | 9.21±0.52  |
| proteasome (prosome, macropain) subunit, beta type 3                                            | Psm3                 | 5.62±0.09  |
| proteasome (prosome, macropain) subunit, beta type 4                                            | Psm4                 | 19.53±0.68 |
| proteasome (prosome, macropain) subunit, beta type 5                                            | Psm5                 | 14.67±0.64 |
| proteasome (prosome, macropain) subunit, beta type 6                                            | Psm6                 | 6.71±0.69  |
| proteasome (prosome, macropain) subunit, beta type 7                                            | Psm7                 | 8.77±0.2   |
| proteasome maturation protein                                                                   | Pomp                 | 17.88±0.37 |
| protective protein for beta-galactosidase                                                       | Ppgb                 | 74.29±3.56 |
| protein (peptidyl-prolyl cis/trans isomerase) NIMA-interacting 1 (predicted)                    | Pin1_predicted       | 3.54±0.29  |
| protein arginine N-methyltransferase 1                                                          | Prmt1                | 2.7±0.23   |
| protein arginine N-methyltransferase 2                                                          | Prmt2                | 0.25±0.1   |
| protein arginine N-methyltransferase 3                                                          | Prmt3                | 0.78±0.14  |
| protein arginine N-methyltransferase 5 (predicted)                                              | Prmt5_predicted      | 1.76±0.33  |
| protein arginine N-methyltransferase 6 (predicted)                                              | Prmt6_predicted      | 0.27±0.09  |
| protein associated with topoisomerase II homolog 1 (yeast)                                      | Patl1                | 1.01±0.07  |
| protein C                                                                                       | Proc                 | 3.43±0.42  |
| protein disulfide isomerase associated 3                                                        | Pdia3                | 9.89±2.51  |
| protein disulfide isomerase associated 4                                                        | Pdia4                | 2.71±0.44  |
| protein disulfide isomerase associated 6                                                        | Pdia6                | 9.66±2.45  |
| protein geranylgeranyltransferase type I, beta subunit                                          | Pggt1b               | 0.41±0.04  |
| protein inhibitor of activated STAT 1 (predicted)                                               | Pias1_predicted      | 1.67±0.04  |
| protein inhibitor of activated STAT 2                                                           | Pias2                | 1.71±0.28  |
| protein inhibitor of activated STAT 3                                                           | Pias3                | 0.27±0.04  |
| protein inhibitor of activated STAT, 4                                                          | Pias4                | 0.68±0.28  |
| protein interacting with C kinase 1                                                             | Pick1                | 0.58±0.29  |

protein kinase C and casein kinase substrate in neurons 1  
 protein kinase C and casein kinase substrate in neurons 2  
 protein kinase C and casein kinase substrate in neurons 3  
 protein kinase C binding protein 1  
 protein kinase C substrate 80K-H (predicted)  
 protein kinase C, alpha  
 protein kinase C, delta  
 protein kinase C, epsilon  
 protein kinase C, iota  
 protein kinase C, zeta  
 protein kinase D3  
 protein kinase inhibitor, gamma  
 protein kinase LYK5  
 protein kinase N1  
 protein kinase N2  
 protein kinase, AMP-activated, alpha 2 catalytic subunit  
 protein kinase, AMP-activated, beta 1 non-catalytic subunit  
 protein kinase, AMP-activated, gamma 1 non-catalytic subunit  
 protein kinase, AMP-activated, gamma 2 non-catalytic subunit  
 Protein kinase, cAMP dependent regulatory, type I, alpha  
 protein kinase, cAMP dependent regulatory, type I, beta  
 protein kinase, cAMP dependent, catalytic, beta  
 protein kinase, cAMP-dependent, catalytic, alpha  
 protein kinase, cAMP-dependent, catalytic, alpha /// similar to CG2662-PA (predicted)

protein kinase, cGMP-dependent, type II  
 protein kinase, DNA activated, catalytic polypeptide (predicted)  
 protein kinase, interferon inducible double stranded RNA dependent activator  
 protein kinase, X-linked  
 protein O-fucosyltransferase 2 (predicted)  
 protein phosphatase 1, catalytic subunit, alpha isoform  
 protein phosphatase 1, catalytic subunit, beta isoform  
 protein phosphatase 1, catalytic subunit, gamma isoform  
 protein phosphatase 1, regulatory (inhibitor) subunit 11  
 protein phosphatase 1, regulatory (inhibitor) subunit 12A  
 protein phosphatase 1, regulatory (inhibitor) subunit 12C  
 protein phosphatase 1, regulatory (inhibitor) subunit 14B  
 protein phosphatase 1, regulatory (inhibitor) subunit 14c  
 protein phosphatase 1, regulatory (inhibitor) subunit 15b (predicted)  
 protein phosphatase 1, regulatory (inhibitor) subunit 16A (predicted)  
 protein phosphatase 1, regulatory (inhibitor) subunit 2  
 protein phosphatase 1, regulatory (inhibitor) subunit 7  
 protein phosphatase 1, regulatory (inhibitor) subunit 8 (predicted)  
 protein phosphatase 1, regulatory subunit 10  
 protein phosphatase 1A, magnesium dependent, alpha isoform  
 protein phosphatase 1B, magnesium dependent, beta isoform  
 protein phosphatase 1D magnesium-dependent, delta isoform (predicted)  
 protein phosphatase 1G (formerly 2C), magnesium-dependent, gamma isoform  
 protein phosphatase 1H (PP2C domain containing)  
 protein phosphatase 2 (formerly 2A), catalytic subunit, alpha isoform  
 protein phosphatase 2 (formerly 2A), catalytic subunit, beta isoform  
 protein phosphatase 2 (formerly 2A), regulatory subunit A (PR 65), alpha isoform  
 protein phosphatase 2 (formerly 2A), regulatory subunit A (PR 65), beta isoform  
 protein phosphatase 2 (formerly 2A), regulatory subunit B (PR 52), alpha isoform  
 protein phosphatase 2 (formerly 2A), regulatory subunit B<sup>''</sup>, alpha  
 protein phosphatase 2, regulatory subunit B (B56), alpha isoform (predicted)  
 protein phosphatase 2, regulatory subunit B (B56), beta isoform  
 protein phosphatase 2, regulatory subunit B (B56), delta isoform  
 protein phosphatase 2, regulatory subunit B (B56), epsilon isoform (predicted)  
 protein phosphatase 2, regulatory subunit B<sup>''</sup> gamma isoform  
 protein phosphatase 2, regulatory subunit B, delta isoform  
 protein phosphatase 2, regulatory subunit B<sup>''</sup>, gamma  
 protein phosphatase 2A, regulatory subunit B (PR 53) (predicted)  
 protein phosphatase 3, catalytic subunit, alpha isoform  
 protein phosphatase 3, catalytic subunit, beta isoform  
 protein phosphatase 3, regulatory subunit B, alpha isoform (calcineurin B, type I)  
 protein phosphatase 4, catalytic subunit  
 protein phosphatase 4, regulatory subunit 1  
 protein phosphatase 4, regulatory subunit 1-like  
 protein phosphatase 4, regulatory subunit 2 (predicted)  
 protein phosphatase 5, catalytic subunit  
 protein phosphatase 6, catalytic subunit  
 protein phosphatase methylesterase 1  
 protein regulator of cytokinesis 1 (predicted)  
 protein S (alpha)  
 protein serine kinase H1 (predicted)  
 protein tyrosine phosphatase 4a1  
 protein tyrosine phosphatase 4a2  
 protein tyrosine phosphatase, mitochondrial 1  
 protein tyrosine phosphatase, non-receptor type 1  
 Protein tyrosine phosphatase, non-receptor type 11  
 protein tyrosine phosphatase, non-receptor type 12  
 protein tyrosine phosphatase, non-receptor type 13  
 Protein tyrosine phosphatase, non-receptor type 14 (predicted)  
 protein tyrosine phosphatase, non-receptor type 2  
 protein tyrosine phosphatase, non-receptor type 21  
 protein tyrosine phosphatase, non-receptor type 23

Pacsin1 0.56±0.12  
 Pacsin2 4.27±0.44  
 Pacsin3 0.28±0.04  
 Prkcbp1 1.66±0.25  
 PrkcsH\_predicted 10.5±1.8  
 Prkca 0.48±0.07  
 Prkcd 1.83±0.18  
 Prkce 0.56±0.17  
 Prkci 2.4±0.75  
 Prkcz 1.88±0.36  
 Prkd3 2.23±0.13  
 Pkg 4.89±0.46  
 Lyk5 1.11±0.04  
 Pkn1 0.34±0.03  
 Pkn2 3.56±0.25  
 Prkaa2 9.77±0.46  
 Prkab1 4.51±0.46  
 Prkag1 1.7±0.33  
 Prkaq2 0.66±0.12  
 Prkar1a 3.6±0.53  
 Prkar1b 0.29±0.07  
 Prkacb 7.36±0.6  
 Prkaca 0.61±0.55  
 Prkaca /// 0.21±0.31  
 RGD1305094\_predicted  
 Prkg2 0.62±0.03  
 Prkdc\_predicted 0.93±0.12  
 Prkra 5.39±0.2  
 Prkx 0.38±0.17  
 Pofut2\_predicted 0.65±0.19  
 Ppp1ca 14.11±1.25  
 Ppp1cb 11.79±0.96  
 Ppp1cc 37.2±1.37  
 Ppp1r11 3.31±0.56  
 Ppp1r12a 0.64±0.09  
 Ppp1r12c 0.9±0.28  
 Ppp1r14b 4.89±0.34  
 Ppp1r14c 0.2±0.05  
 Ppp1r15b\_predicted 2.82±0.32  
 Ppp1r16a\_predicted 0.25±0.05  
 Ppp1r2 7.48±0.04  
 Ppp1r7 2.36±0.26  
 Ppp1r8\_predicted 1.37±0.05  
 Ppp1r10 0.84±0.15  
 Ppm1a 1.44±0.18  
 Ppm1b 9.25±0.85  
 Ppm1d\_predicted 0.47±0.14  
 Ppm1g 2.11±0.34  
 Ppm1h 0.9±0.08  
 Ppp2ca 13.92±0.38  
 Ppp2cb 7.54±0.38  
 Ppp2r1a 4.01±0.4  
 Ppp2r1b 8.48±1.08  
 Ppp2r2a 2.24±0.37  
 Ppp2r3a 3.19±0.4  
 Ppp2r5a\_predicted 9.76±1.65  
 Ppp2r5b 2.19±0.22  
 Ppp2r5d 0.5±0.18  
 Ppp2r5e\_predicted 3.18±0.6  
 Ppp2r5c 1.32±0.2  
 Ppp2r2d 3.35±0.15  
 Ppp2r3c 1.09±0.16  
 Ppp2r4\_predicted 3.4±0.55  
 Ppp3ca 3.24±0.44  
 Ppp3cb 2.28±0.2  
 Ppp3r1 2.43±0.59  
 Ppp4c 0.75±0.23  
 Ppp4r1 1.5±0.29  
 Ppp4r1l 0.49±0.05  
 Ppp4r2\_predicted 4.93±0.38  
 Ppp5c 1.2±0.27  
 Ppp6c 2.77±0.37  
 Ppme1 3.98±0.28  
 Prc1\_predicted 1.02±0.33  
 Pros1 0.27±0.18  
 Pskh1\_predicted 0.42±0.24  
 Ptp4a1 11±1.3  
 Ptp4a2 9.19±0.48  
 Ptpmt1 5.96±0.41  
 Ptpn1 0.33±0.05  
 Ptpn11 2.14±0.46  
 Ptpn12 2.93±0.28  
 Ptpn13 4.82±0.94  
 Ptpn14\_predicted 0.26±0.19  
 Ptpn2 1.96±0.26  
 Ptpn21 1.72±0.12  
 Ptpn23 0.9±0.13

|                                                                                                                        |                         |            |
|------------------------------------------------------------------------------------------------------------------------|-------------------------|------------|
| protein tyrosine phosphatase, non-receptor type 6                                                                      | Ptpn6                   | 0.42±0.11  |
| protein tyrosine phosphatase, receptor type, A                                                                         | Ptpna                   | 0.41±0.19  |
| protein tyrosine phosphatase, receptor type, F                                                                         | Ptpnf                   | 2.62±0.47  |
| protein tyrosine phosphatase, receptor type, f polypeptide (PTPRF), interacting protein, alpha 1 (predicted)           | Ppfia1_predicted        | 0.94±0.33  |
| Protein tyrosine phosphatase, receptor type, G                                                                         | Ptpng                   | 0.89±0.09  |
| protein tyrosine phosphatase, receptor type, J                                                                         | Ptpnj                   | 0.94±0.08  |
| protein tyrosine phosphatase, receptor type, K, extracellular region                                                   | Ptpnk                   | 2.91±0.32  |
| protein tyrosine phosphatase, receptor type, N                                                                         | Ptpnn                   | 1.58±0.23  |
| protein tyrosine phosphatase, receptor-type, F interacting protein, binding protein 2                                  | Ppfibp2                 | 2.41±0.29  |
| protein tyrosine phosphatase-like (proline instead of catalytic arginine), member a                                    | Ptpla                   | 1.95±0.24  |
| protein tyrosine phosphatase-like (proline instead of catalytic arginine), member b (predicted)                        | LOC690040 ///           | 3.22±0.25  |
|                                                                                                                        | Ptblb_predicted         |            |
| protein-kinase, interferon-inducible double stranded RNA dependent inhibitor, repressor of (P58 repressor) (predicted) | Prkrir_predicted        | 1.66±0.21  |
| protein-L-isoaspartate (D-aspartate) O-methyltransferase 1                                                             | Pcmt1                   | 2.29±0.1   |
| protein-L-isoaspartate (D-aspartate) O-methyltransferase domain containing 2 (predicted)                               | Pcmt2_predicted         | 3.84±0.29  |
| protein-O-mannosyltransferase 1                                                                                        | Pomt1                   | 0.79±0.1   |
| protein-O-mannosyltransferase 2                                                                                        | Pomt2                   | 2.84±0.39  |
| proteolipid protein 2                                                                                                  | Plp2                    | 1.15±0.08  |
| prothymosin alpha                                                                                                      | Ptma                    | 13.96±0.66 |
| Protocadherin 1 (cadherin-like 1) (predicted)                                                                          | Pcdh1_predicted         | 0.58±0.27  |
| protocadherin 24                                                                                                       | Pcdh24                  | 5.53±0.76  |
| protocadherin alpha 4                                                                                                  | Pcdha1 /// Pcdha10 ///  | 0.33±0.18  |
|                                                                                                                        | Pcdha11 /// Pcdha12 /// |            |
|                                                                                                                        | Pcdha13 /// Pcdha2 ///  |            |
|                                                                                                                        | Pcdha3 /// Pcdha4 ///   |            |
|                                                                                                                        | Pcdha5 /// Pcdha6 ///   |            |
|                                                                                                                        | Pcdha7 /// Pcdha8 ///   |            |
|                                                                                                                        | Pcdha9 /// Pcdhac1 ///  |            |
|                                                                                                                        | Pcdhac2                 |            |
| protoporphyrinogen oxidase (predicted)                                                                                 | Ppox_predicted          | 2.62±0.17  |
| PRP18 pre-mRNA processing factor 18 homolog (yeast)                                                                    | Prpf18                  | 1.41±0.25  |
| PRP19/PSO4 pre-mRNA processing factor 19 homolog (S. cerevisiae)                                                       | Prpf19                  | 0.74±0.16  |
| PRP3 pre-mRNA processing factor 3 homolog (yeast) (predicted)                                                          | Prpf3_predicted         | 1.14±0.2   |
| PRP38 pre-mRNA processing factor 38 (yeast) domain containing A (predicted)                                            | Prpf38a_predicted       | 2.12±0.23  |
| PRP38 pre-mRNA processing factor 38 (yeast) domain containing B                                                        | Prpf38b                 | 1.25±0.2   |
| PRP39 pre-mRNA processing factor 39 homolog (yeast) (predicted)                                                        | Prpf39_predicted        | 2.91±0.52  |
| PRP4 pre-mRNA processing factor 4 homolog (yeast)                                                                      | Prpf4                   | 1.91±0.23  |
| PRP4 pre-mRNA processing factor 4 homolog B (yeast)                                                                    | Prpf4b                  | 1.94±0.16  |
| PRP40 pre-mRNA processing factor 40 homolog A (S. cerevisiae)                                                          | Prpf40a                 | 0.83±0.14  |
| PRP6 pre-mRNA splicing factor 6 homolog (S. cerevisiae)                                                                | Prpf6                   | 1.47±0.33  |
| pseudouridine synthase 1                                                                                               | Pus1                    | 1.1±0.16   |
| pseudouridylylase synthase-like 1                                                                                      | Pusl1                   | 0.38±0.04  |
| PTC7 protein phosphatase homolog (S. cerevisiae)                                                                       | Ptpc7                   | 1.35±0.35  |
| PTEN induced putative kinase 1 (predicted)                                                                             | Pink1_predicted         | 8.18±1.35  |
| pterin 4 alpha carbinolamine dehydratase/dimerization cofactor of hepatocyte nuclear factor 1 alpha (TCF1) 1           | Pcbd1                   | 39.75±1.07 |
| PTK2 protein tyrosine kinase 2                                                                                         | Ptk2                    | 4.14±0.28  |
| PTPRF interacting protein, binding protein 1 (liprin beta 1) (predicted)                                               | Ppfibp1_predicted       | 3.68±0.53  |
| Pumilio 1 (Drosophila) (predicted)                                                                                     | Pum1_predicted          | 3.05±0.32  |
| pumilio 2 (Drosophila)                                                                                                 | Pum2                    | 7.19±0.81  |
| purine rich element binding protein A (predicted)                                                                      | Pura_predicted          | 5.85±0.93  |
| purine rich element binding protein B                                                                                  | Purb                    | 0.67±0.1   |
| purinergic receptor P2X, ligand-gated ion channel 4                                                                    | P2rx4                   | 2.88±0.71  |
| purine-rich element binding protein G (predicted)                                                                      | Purg_predicted          | 0.27±0.1   |
| putative GTP-binding protein                                                                                           | LOC293589               | 2.17±0.16  |
| putative homeodomain transcription factor 1                                                                            | Phtf1                   | 1.88±0.32  |
| putative homeodomain transcription factor 2 (predicted)                                                                | Phtf2_predicted         | 1.05±0.25  |
| putative nucleic acid binding protein RY-1                                                                             | Ry1                     | 4.87±0.67  |
| putative scaffolding protein POSH                                                                                      | Sh3md2                  | 0.68±0.14  |
| putative UA20 protein                                                                                                  | Ua20                    | 7.86±1.67  |
| PWP1 homolog (S. cerevisiae) (predicted)                                                                               | Pwp1_predicted          | 0.67±0.02  |
| PX domain containing serine/threonine kinase                                                                           | Pxk                     | 0.92±0.27  |
| pyridoxal (pyridoxine, vitamin B6) kinase /// similar to pyridoxal (pyridoxine, vitamin B6) kinase (predicted)         | Pdxk ///                | 1.59±0.12  |
|                                                                                                                        | RGD1566085_predicted    |            |
| pyridoxine 5'-phosphate oxidase                                                                                        | Pnpo                    | 4.11±0.33  |
| pyroglutamyl-peptidase I                                                                                               | Pgpep1                  | 47.07±4.15 |
| pyrophosphatase (inorganic) 1                                                                                          | Ppa1                    | 2.95±0.43  |
| pyrophosphatase (inorganic) 2 (predicted)                                                                              | Ppa2_predicted          | 19.23±2.37 |
| pyrroline-5-carboxylate reductase family, member 2                                                                     | Pycr2                   | 0.61±0.1   |
| pyrroline-5-carboxylate reductase-like                                                                                 | Pycl1                   | 1.44±0.18  |
| pyrroline-5-carboxylate synthetase (glutamate gamma-semialdehyde synthetase) (predicted)                               | Pycs_predicted          | 0.23±0.17  |
| pyruvate carboxylase                                                                                                   | Pcx                     | 11.08±0.77 |
| pyruvate dehydrogenase (lipoamide) beta                                                                                | Pdhb                    | 17.64±1.07 |
| pyruvate dehydrogenase complex, component X                                                                            | Pdhx                    | 2.72±0.12  |
| pyruvate dehydrogenase E1 alpha 1                                                                                      | Pdha1                   | 22.71±0.59 |
| pyruvate dehydrogenase kinase, isoenzyme 2                                                                             | Pdk2                    | 28.26±3.08 |
| pyruvate dehydrogenase kinase, isoenzyme 3                                                                             | Pdk3                    | 1.59±0.16  |
| pyruvate dehydrogenase phosphatase isoenzyme 2                                                                         | Pdp2                    | 9.44±0.14  |
| pyruvate dehydrogenase phosphatase regulatory subunit                                                                  | Pdpr                    | 0.32±0.05  |
| pyruvate kinase, liver and red blood cell                                                                              | Pklr                    | 2.08±0.41  |
| quaking                                                                                                                | Qk                      | 3.95±0.59  |
| quaking homolog, KH domain RNA binding (mouse) /// quaking                                                             | Qk /// Qki              | 1.32±0.46  |
| queuine tRNA-ribosyltransferase 1                                                                                      | Qtrt1                   | 0.35±0.1   |
| quiescin Q6 sulfhydryl oxidase 2                                                                                       | Qsox2                   | 0.61±0.11  |
| quinoid dihydropteridine reductase                                                                                     | Qdpr                    | 34.78±0.36 |
| quinolinate phosphoribosyltransferase                                                                                  | Qprt                    | 11.55±2.07 |
| R3H domain 1 (binds single-stranded nucleic acids)                                                                     | R3hdm1                  | 1.6±0.18   |
| R3H domain and coiled-coil containing 1 (predicted)                                                                    | R3hcc1_predicted        | 1.33±0.17  |

|                                                                                  |                    |            |
|----------------------------------------------------------------------------------|--------------------|------------|
| R3H domain containing 2                                                          | R3hdm2             | 0.74±0.03  |
| Rab acceptor 1 (prenylated)                                                      | Rabac1             | 6.27±0.51  |
| Rab geranylgeranyl transferase, a subunit                                        | Rabgga             | 0.81±0.16  |
| RAB geranylgeranyl transferase, b subunit                                        | Rabggb             | 6.08±0.69  |
| RAB GTPase activating protein 1                                                  | Rabgap1            | 2.58±0.1   |
| RAB GTPase activating protein 1-like                                             | Rabgap11           | 0.3±0.04   |
| RAB guanine nucleotide exchange factor (GEF) 1 (predicted)                       | Rabgef1_predicted  | 0.48±0     |
| RAB interacting factor                                                           | Rabif              | 0.79±0.03  |
| Rab interacting lysosomal protein-like 2                                         | Rilpl2             | 5.23±0.39  |
| RAB, member of RAS oncogene family-like 2A                                       | Rab12a             | 1.25±0.12  |
| RAB, member of RAS oncogene family-like 3 (predicted)                            | Rab13_predicted    | 0.63±0.02  |
| RAB, member of RAS oncogene family-like 4 (predicted)                            | Rab14_predicted    | 0.71±0.08  |
| RAB, member of RAS oncogene family-like 5                                        | Rab15              | 0.33±0.01  |
| RAB1, member RAS oncogene family                                                 | Rab1               | 34.03±2.4  |
| RAB10, member RAS oncogene family                                                | Rab10              | 5.26±0.49  |
| RAB11a, member RAS oncogene family                                               | Rab11a             | 15.61±0.47 |
| RAB11B, member RAS oncogene family                                               | Rab11b             | 2.94±1.2   |
| RAB12, member RAS oncogene family                                                | Rab12              | 1.04±0.55  |
| RAB13, member RAS oncogene family                                                | Rab13              | 0.66±0.21  |
| RAB14, member RAS oncogene family                                                | Rab14              | 2.81±0.53  |
| RAB17, member RAS oncogene family                                                | Rab17              | 3.85±0.18  |
| RAB18, member RAS oncogene family                                                | Rab18              | 3.44±0.44  |
| RAB2, member RAS oncogene family                                                 | Rab2               | 14.6±0.25  |
| RAB20, member RAS oncogene family                                                | Rab20              | 1.34±0.23  |
| RAB21, member RAS oncogene family                                                | Rab21              | 4.33±0.46  |
| RAB22A, member RAS oncogene family (predicted)                                   | Rab22a_predicted   | 1.55±0.26  |
| RAB23, member RAS oncogene family (predicted)                                    | Rab23_predicted    | 1.28±0.11  |
| RAB24, member RAS oncogene family                                                | Rab24              | 4.21±0.34  |
| RAB28, member RAS oncogene family                                                | Rab28              | 6.68±0.61  |
| RAB2B, member RAS oncogene family                                                | Rab2b              | 5.31±0.81  |
| RAB3 GTPase activating protein subunit 2                                         | Rab3gap2           | 0.37±0.26  |
| RAB32, member RAS oncogene family                                                | Rab32              | 0.75±0.11  |
| RAB33B, member of RAS oncogene family (predicted)                                | Rab33b_predicted   | 0.65±0.23  |
| RAB34, member of RAS oncogene family                                             | Rab34              | 7.03±0.64  |
| RAB35, member RAS oncogene family                                                | Rab35              | 1.14±0.38  |
| RAB3A interacting protein                                                        | Rab3ip             | 5.12±0.41  |
| RAB3A interacting protein (rabin3)-like 1                                        | Rab3il1            | 0.55±0.12  |
| RAB3A, member RAS oncogene family                                                | Rab3a              | 1.07±0.23  |
| Rab40b, member RAS oncogene family (predicted)                                   | Rab40b_predicted   | 1.3±0.12   |
| Rab40c, member RAS oncogene family                                               | Rab40c             | 0.52±0.21  |
| RAB4A, member RAS oncogene family                                                | Rab4a              | 3.22±0.03  |
| RAB4B, member RAS oncogene family                                                | Rab4b              | 0.72±0.24  |
| RAB5A, member RAS oncogene family                                                | Rab5a              | 5.64±0.74  |
| RAB5B, member RAS oncogene family (predicted)                                    | Rab5b_predicted    | 6.26±0.73  |
| RAB5C, member RAS oncogene family (predicted)                                    | Rab5c_predicted    | 1.7±0.8    |
| RAB6A, member RAS oncogene family                                                | Rab6a              | 9.07±0.49  |
| RAB7, member RAS oncogene family                                                 | Rab7               | 18.55±0.69 |
| RAB7, member RAS oncogene family-like 1                                          | Rab7l1             | 5.54±1.8   |
| RAB8A, member RAS oncogene family                                                | Rab8a              | 2.81±0.4   |
| Rab9 effector protein with kelch motifs                                          | Rabepk             | 0.64±0.19  |
| RAB9, member RAS oncogene family                                                 | Rab9               | 3.76±0.57  |
| rabaptin, RAB GTPase binding effector protein 1                                  | Rabep1             | 1.75±0.18  |
| rabaptin, RAB GTPase binding effector protein 2                                  | Rabep2             | 0.35±0.14  |
| rad and gem related GTP binding protein 2                                        | Rem2               | 0.94±0.25  |
| RAD1 homolog (S. pombe) (predicted)                                              | Rad1_predicted     | 0.58±0.11  |
| RAD17 homolog (S. pombe)                                                         | Rad17              | 1.39±0.1   |
| RAD21 homolog (S. pombe)                                                         | Rad21              | 11.07±0.27 |
| RAD23a homolog (S. cerevisiae)                                                   | Rad23a             | 0.35±0.24  |
| RAD23b homolog (S. cerevisiae)                                                   | Rad23b             | 7.95±0.41  |
| RAD50 homolog (S. cerevisiae)                                                    | Rad50              | 0.38±0.07  |
| Rad51 homolog c (S. cerevisiae)                                                  | Rad51c             | 0.38±0.09  |
| RAD52 homolog (S. cerevisiae) (predicted)                                        | Rad52_predicted    | 0.47±0.09  |
| RAD52 motif 1 (predicted)                                                        | Rdm1_predicted     | 0.67±0.05  |
| Rad54 like 2 (S. cerevisiae) (predicted)                                         | Rad54l2_predicted  | 0.22±0.08  |
| RAD9 homolog B (S. cerevisiae)                                                   | Rad9b              | 0.28±0.1   |
| radical fringe gene homolog (Drosophila)                                         | Rfnq               | 1.17±0.13  |
| radixin                                                                          | Rdx                | 6.81±0.65  |
| RAE1 RNA export 1 homolog (S. pombe)                                             | Rae1               | 1.1±0.13   |
| Ral guanine nucleotide dissociation stimulator,-like 1 (predicted)               | Rql1_predicted     | 8.72±1.29  |
| ralA binding protein 1                                                           | Ralbp1             | 1.24±0.22  |
| RalBP1 associated Eps domain containing protein (predicted)                      | Reps1_predicted    | 0.97±0.03  |
| RAN binding protein 10 (predicted)                                               | Ranbp10_predicted  | 0.71±0.31  |
| RAN binding protein 2                                                            | Ranbp2             | 5.61±0.14  |
| RAN binding protein 3                                                            | Ranbp3             | 1.54±0.08  |
| RAN binding protein 5 (predicted)                                                | Ranbp5_predicted   | 1.4±0.13   |
| RAN binding protein 6 (predicted)                                                | Ranbp6_predicted   | 1.01±0.46  |
| RAN GTPase activating protein 1                                                  | Rangap1            | 1.76±0.4   |
| RAN guanine nucleotide release factor                                            | Rangrf             | 3.21±0.1   |
| RAN, member RAS oncogene family                                                  | Ran                | 19.77±1.21 |
| RanBP-type and C3HC4-type zinc finger containing 1                               | Rbck1              | 0.5±0.22   |
| Rap guanine nucleotide exchange factor (GEF) 2 (predicted)                       | Rapgef2_predicted  | 1.73±0.28  |
| Rap guanine nucleotide exchange factor (GEF) 3                                   | Rapgef3            | 0.74±0.2   |
| Rap1 interacting factor 1 homolog (yeast)                                        | Rif1               | 0.44±0.08  |
| RAP1, GTP-GDP dissociation stimulator 1 (predicted)                              | Rap1gds1_predicted | 2.13±0.05  |
| RAR-related orphan receptor alpha (predicted)                                    | Rora_predicted     | 1.66±0.41  |
| RAR-related orphan receptor C /// leucine rich repeat and Ig domain containing 4 | Lingo4 /// Rorc    | 0.44±0.07  |
| Ras and Rab interactor 2 (predicted)                                             | Rin2_predicted     | 10.59±1.94 |

|                                                                                       |                   |            |
|---------------------------------------------------------------------------------------|-------------------|------------|
| Ras association (RalGDS/AF-6) and pleckstrin homology domains 1 (predicted)           | Raph1_predicted   | 1.06±0.19  |
| Ras association (RalGDS/AF-6) domain family 1                                         | Rassf1            | 0.98±0.21  |
| Ras association (RalGDS/AF-6) domain family 3 (predicted)                             | Rassf3_predicted  | 0.56±0.04  |
| Ras association (RalGDS/AF-6) domain family 7 (predicted)                             | Rassf7_predicted  | 1.4±0.12   |
| Ras association (RalGDS/AF-6) domain family member 6                                  | Rassf6            | 0.69±0.11  |
| Ras homolog enriched in brain                                                         | Rheb              | 10.44±1.04 |
| ras homolog gene family, member A                                                     | Rhoa              | 11.7±1.27  |
| ras homolog gene family, member B                                                     | Rhob              | 7.39±2.27  |
| ras homolog gene family, member C (predicted)                                         | Rhoc_predicted    | 5.03±0.38  |
| ras homolog gene family, member D (predicted)                                         | Rhod_predicted    | 2±0.29     |
| Ras homolog gene family, member G                                                     | Rhog              | 0.64±0.2   |
| ras homolog gene family, member Q                                                     | Rhoq              | 2.72±0.09  |
| ras homolog gene family, member T2                                                    | Rhot2             | 1.76±0.21  |
| RAS p21 protein activator 1                                                           | Rasa1             | 2.4±0.11   |
| RAS p21 protein activator 2                                                           | Rasa2             | 0.94±0.07  |
| RAS p21 protein activator 3                                                           | Rasa3             | 0.71±0.07  |
| RAS protein activator like 2 (predicted)                                              | Rasal2_predicted  | 0.75±0.22  |
| RAS related protein 1b                                                                | Rap1b             | 5.2±0.34   |
| ras responsive element binding protein 1 (predicted)                                  | Rreb1_predicted   | 3.46±0.55  |
| Ras-GTPase-activating protein SH3-domain binding protein 1                            | G3bp1             | 3.42±0.65  |
| RAS-like, family 10, member B (predicted)                                             | Rasl10b_predicted | 0.47±0.07  |
| RAS-like, family 12 (predicted)                                                       | Rasl12_predicted  | 1.65±0.32  |
| Ras-related C3 botulinum toxin substrate 1                                            | Rac1              | 6.94±1.32  |
| Ras-related GTP binding A                                                             | Rraga             | 5.91±0.11  |
| Ras-related GTP binding B                                                             | RragB             | 0.37±0.07  |
| Ras-related GTP binding C (predicted)                                                 | Rragc_predicted   | 6.84±0.5   |
| Ras-related GTP binding D (predicted)                                                 | Rragd_predicted   | 1.27±0.4   |
| RAS-related protein 1a                                                                | Rap1a             | 8.67±0.58  |
| RB1-inducible coiled-coil 1 (predicted)                                               | Rb1cc1_predicted  | 3.01±0.44  |
| RB-associated KRAB repressor                                                          | Rbak              | 0.24±0.08  |
| RBSC-skeletrophin                                                                     | LOC474147         | 0.73±0.11  |
| rcd1 (required for cell differentiation) homolog 1 (S. pombe)                         | Rgcd1             | 0.86±0.19  |
| RCE1 homolog, prenyl protein peptidase (S. cerevisiae)                                | Rce1              | 1.21±0.11  |
| rearranged L-myc fusion sequence (predicted)                                          | Rlf_predicted     | 0.37±0.11  |
| receptor (TNFRSF)-interacting serine-threonine kinase 1 (predicted)                   | Ripk1_predicted   | 1.57±0.35  |
| receptor accessory protein 4                                                          | Reep4             | 0.77±0.06  |
| receptor interacting protein kinase 5                                                 | Ripk5             | 0.88±0.11  |
| receptor-interacting serine-threonine kinase 4 (predicted)                            | Ripk4_predicted   | 2.09±0.26  |
| receptor-like tyrosine kinase                                                         | Ryk               | 1.32±0.18  |
| recombination activating gene 1 activating protein 1 (predicted)                      | Rag1ap1_predicted | 1.97±0.15  |
| recombining binding protein suppressor of hairless (Drosophila) (predicted)           | LOC679028 ///     | 0.54±0.02  |
| RecQ protein-like                                                                     | Rbpsuh_predicted  |            |
| RecQ protein-like 5 (predicted)                                                       | Recql             | 1.37±0.3   |
| reelin                                                                                | Recql5_predicted  | 0.65±0.14  |
| regulated endocrine-specific protein 18                                               | Reln              | 1.26±0.2   |
| regulator of calcineurin 1                                                            | Resp18            | 2.09±0.76  |
| regulator of chromosome condensation (RCC1) and BTB (POZ) domain containing protein 1 | Rcan1             | 12.56±1.22 |
| regulator of chromosome condensation (RCC1) and BTB (POZ) domain containing protein 2 | Rcbbt1            | 1.18±0.17  |
| regulator of telomere elongation helicase 1                                           | Rcbbt2            | 1.28±0.28  |
| regulatory factor X domain containing 2 homolog (human)                               | Rtel1             | 1.43±0.25  |
| regulatory factor X, 1 (influences HLA class II expression) (predicted)               | Rfxdc2            | 1.35±0.38  |
| regulatory factor X, 5 (influences HLA class II expression) (predicted)               | Rfx1_predicted    | 0.64±0.14  |
| regulatory factor X-associated protein                                                | Rfx5_predicted    | 1.4±0.18   |
| related RAS viral (r-ras) oncogene homolog 2                                          | Rfxap             | 0.88±0.08  |
| REL1-like 2                                                                           | Rras2             | 4.83±0.36  |
| remodeling and spacing factor 1                                                       | Rel12             | 1.74±0.49  |
| renin binding protein                                                                 | Rsf1              | 0.95±0.19  |
| replication factor C (activator 1) 1                                                  | Renbp             | 7.21±1.03  |
| replication factor C (activator 1) 2                                                  | Rfc1              | 0.48±0.09  |
| replication factor C (activator 1) 3                                                  | Rfc2              | 1.34±0.38  |
| replication factor C (activator 1) 4 (predicted)                                      | Rfc3              | 0.24±0.12  |
| replication factor C (activator 1) 5 (predicted)                                      | Rfc4_predicted    | 1.33±0.16  |
| Replication factor C 1                                                                | Rfc5_predicted    | 1.07±0.04  |
| Replication protein A1                                                                | Recc1             | 0.56±0.19  |
| replication protein A2                                                                | Rpa1              | 0.64±0.01  |
| replication protein A3 (predicted)                                                    | Rpa2              | 0.42±0.17  |
| required for meiotic nuclear division 5 homolog A (S. cerevisiae)                     | Rpa3_predicted    | 4.02±0.16  |
| RER1 retention in endoplasmic reticulum 1 homolog (S. cerevisiae)                     | Rmnd5a            | 3.59±0.35  |
| resistance to inhibitors of cholinesterase 8 homolog (C. elegans)                     | Rer1              | 8.23±1.01  |
| REST corepressor 1 (predicted)                                                        | Ric8              | 2.94±0.16  |
| reticulocalbin 2                                                                      | Rcor1_predicted   | 0.96±0.2   |
| reticulon 3                                                                           | Rcn2              | 3.92±0.19  |
| reticulon 4                                                                           | Rtn3              | 7.9±0.89   |
| reticulon 4 interacting protein 1                                                     | Rtn4              | 11.02±1.67 |
| retinitis pigmentosa 2 homolog (human) (predicted)                                    | Rtn4ip1           | 0.88±0.14  |
| Retinitis pigmentosa 9 homolog (human) (predicted)                                    | Rp2h_predicted    | 0.46±0.09  |
| retinoblastoma 1                                                                      | Rp9h_predicted    | 0.21±0.08  |
| retinoblastoma binding protein 4                                                      | Rb1               | 1.38±0.09  |
| retinoblastoma binding protein 5 (predicted)                                          | Rbbp4             | 3.95±0.87  |
| retinoblastoma binding protein 6                                                      | Rbbp5_predicted   | 0.85±0.16  |
| retinoblastoma binding protein 7                                                      | Rbbp6             | 1.45±0.2   |
| retinoblastoma binding protein 9                                                      | Rbbp7             | 15±0.67    |
| retinoblastoma-like 2                                                                 | Rbbp9             | 1.06±0.02  |
| retinoic acid induced 1 (predicted)                                                   | Rbl2              | 2.4±0.25   |
| retinoic acid induced 12                                                              | Rai1_predicted    | 0.25±0.19  |
| retinoic acid induced 14                                                              | Rai12             | 1.54±0.23  |
|                                                                                       | Rai14             | 0.93±0.06  |

|                                                                                                                 |                      |            |
|-----------------------------------------------------------------------------------------------------------------|----------------------|------------|
| retinoic acid receptor responder (tazarotene induced) 2                                                         | Rarres2              | 11.7±3.49  |
| retinoic acid receptor, alpha                                                                                   | Rara                 | 0.23±0.13  |
| retinoic acid receptor, beta                                                                                    | Rarb                 | 0.87±0.22  |
| Retinoid X receptor alpha                                                                                       | Rxra                 | 6.1±0.85   |
| retinoid X receptor beta                                                                                        | Rxrb                 | 0.2±0.03   |
| retinoid X receptor gamma                                                                                       | Rxrg                 | 2.76±0.12  |
| retinol binding protein 1, cellular                                                                             | Rbp1                 | 26.94±2.89 |
| Retinol dehydrogenase 10 (all-trans)                                                                            | Rdh10                | 5.14±0.28  |
| retinol dehydrogenase 11                                                                                        | Rdh11                | 1.04±0.05  |
| Retinol dehydrogenase 13 (all-trans and 9-cis) (predicted)                                                      | Rdh13_predicted      | 1.49±0.37  |
| retinol dehydrogenase 2                                                                                         | Rdh2                 | 3.52±0.45  |
| retinol dehydrogenase 5 (predicted)                                                                             | Rdh5_predicted       | 1.49±0.25  |
| retinol saturase (all trans retinol 13,14 reductase)                                                            | Retsat               | 10.95±1.52 |
| REV1 homolog (S. cerevisiae)                                                                                    | Rev1                 | 0.81±0.24  |
| REV3-like, catalytic subunit of DNA polymerase zeta RAD54 like (S. cerevisiae)                                  | Rev3l                | 1.33±0.19  |
| REX2, RNA exonuclease 2 homolog (S. cerevisiae)                                                                 | Rexo2                | 4.96±0.18  |
| REX4, RNA exonuclease 4 homolog (S. cerevisiae)                                                                 | Rexo4                | 2.03±0.42  |
| RFT1 homolog (S. cerevisiae) (predicted)                                                                        | Rft1_predicted       | 0.89±0.09  |
| RGD1559600 (predicted)                                                                                          | RGD1559600_predicted | 0.58±0.12  |
| RGD1559909 (predicted)                                                                                          | RGD1559909_predicted | 1.12±0.28  |
| RGD1560566 (predicted)                                                                                          | RGD1560566_predicted | 2.64±0.35  |
| RGD1561796 (predicted)                                                                                          | RGD1561796_predicted | 0.51±0.17  |
| RGD1561797 (predicted)                                                                                          | RGD1561797_predicted | 0.54±0.17  |
| RGD1562012 (predicted)                                                                                          | RGD1562012_predicted | 0.56±0.04  |
| RGD1562114 (predicted)                                                                                          | RGD1562114_predicted | 3.17±0.35  |
| RGD1562146 (predicted)                                                                                          | RGD1562146_predicted | 1.03±0.15  |
| RGD1563547 (predicted)                                                                                          | RGD1563547_predicted | 6.81±0.88  |
| RGD1564379 (predicted)                                                                                          | RGD1564379_predicted | 2.76±0.23  |
| RGD1564391 (predicted)                                                                                          | RGD1564391_predicted | 11.78±0.81 |
| RGD1564491 (predicted)                                                                                          | RGD1564491_predicted | 0.34±0.08  |
| RGD1564792 (predicted)                                                                                          | RGD1564792_predicted | 0.31±0.16  |
| RGD1564982 (predicted)                                                                                          | RGD1564982_predicted | 0.22±0.13  |
| RGD1565210 (predicted)                                                                                          | RGD1565210_predicted | 1.69±0.46  |
| RGD1565616 (predicted)                                                                                          | RGD1565616_predicted | 6.22±0.39  |
| RGD1565641 (predicted)                                                                                          | RGD1565641_predicted | 4.84±0.55  |
| RGD1565784 (predicted)                                                                                          | RGD1565784_predicted | 2.09±0.3   |
| RGD1566118 (predicted)                                                                                          | RGD1566118_predicted | 0.77±0.18  |
| RGD1566320 (predicted)                                                                                          | RGD1566320_predicted | 2.73±0.23  |
| Rho family GTPase 3                                                                                             | Rnd3                 | 1.18±0.09  |
| Rho GDP dissociation inhibitor (GDI) alpha                                                                      | Arhgdia              | 3.43±1.61  |
| Rho GTPase activating protein 10                                                                                | Arhgap10             | 2.22±0.17  |
| Rho GTPase activating protein 11A                                                                               | Arhgap11a            | 0.55±0.22  |
| Rho GTPase activating protein 12 (predicted)                                                                    | Arhgap12_predicted   | 0.93±0.06  |
| Rho GTPase activating protein 17                                                                                | Arhgap17             | 10.46±0.53 |
| Rho GTPase activating protein 18 (predicted)                                                                    | Arhgap18_predicted   | 1.48±0.29  |
| Rho GTPase activating protein 21 (predicted)                                                                    | Arhgap21_predicted   | 1.78±0.36  |
| Rho GTPase activating protein 24                                                                                | Arhgap24             | 23.45±2.15 |
| Rho GTPase activating protein 27                                                                                | Arhgap27             | 1.17±0.17  |
| Rho GTPase activating protein 5                                                                                 | Arhgap5              | 1.24±0.07  |
| Rho GTPase activating protein 8                                                                                 | Arhgap8              | 1.32±0.19  |
| Rho GTPase activating protein 9                                                                                 | Arhgap9              | 0.27±0.05  |
| Rho guanine nucleotide exchange factor (GEF) 12                                                                 | Arhgef12             | 0.74±0.12  |
| Rho guanine nucleotide exchange factor (GEF) 15 (predicted)                                                     | Arhgef15_predicted   | 1.15±0.23  |
| Rho guanine nucleotide exchange factor (GEF) 17 (predicted)                                                     | Arhgef17_predicted   | 0.53±0.17  |
| Rho guanine nucleotide exchange factor (GEF) 3 (predicted)                                                      | Arhgef3_predicted    | 0.55±0.3   |
| Rho guanine nucleotide exchange factor (GEF) 5                                                                  | Arhgef5              | 0.97±0.15  |
| Rho guanine nucleotide exchange factor 7                                                                        | Arhgef7              | 1.09±0.14  |
| rho/rac guanine nucleotide exchange factor (GEF) 18 (predicted)                                                 | Arhgef18_predicted   | 1.07±0.3   |
| Rho-associated coiled-coil forming kinase 2                                                                     | Rock2                | 0.44±0.12  |
| Rho-guanine nucleotide exchange factor (predicted)                                                              | Rqnef_predicted      | 2.73±0.31  |
| rhomboid domain containing 2                                                                                    | Rhbdd2               | 2.91±0.11  |
| rhomboid family 1 (Drosophila)                                                                                  | Rhbdf1               | 1.59±0.32  |
| rhomboid, veinlet-like 3 (Drosophila)                                                                           | Rhbdl3               | 0.47±0.04  |
| rhopilin, Rho GTPase binding protein 1 (predicted)                                                              | Rhpn1_predicted      | 2.96±0.83  |
| Rho-related BTB domain containing 1 (predicted)                                                                 | Rhobtb1_predicted    | 5.37±0.56  |
| RIB43A domain with coiled-coils 1                                                                               | Ribc1                | 0.38±0.06  |
| riboflavin kinase // similar to riboflavin kinase (predicted)                                                   | Rfk ///              | 13.13±1.5  |
| ribokinase (predicted)                                                                                          | RGD1563242_predicted |            |
| ribonuclease H2, large subunit                                                                                  | Rbks_predicted       | 2.61±0.23  |
| ribonuclease H2, subunit B                                                                                      | Rnaseh2a             | 0.86±0.05  |
| ribonuclease III, nuclear                                                                                       | Rnaseh2b             | 4.37±0.06  |
| ribonuclease P 14 subunit (human)                                                                               | Rnasen               | 1.15±0.04  |
| ribonuclease P 21 subunit (human) // RT1 class I, M10, gene 1                                                   | Rpp14                | 1.57±0.13  |
| ribonuclease P 25 subunit (human)                                                                               | Rpp21 // RT1-M10-1   | 1.08±0.2   |
| ribonuclease P 40 subunit (human)                                                                               | Rpp25                | 4.77±1.09  |
| ribonuclease P/MRP 30 // similar to Ribonuclease P protein subunit p30 (RNaseP protein p30) (RNase P subunit 2) | Rpp40                | 0.56±0.12  |
| ribonuclease T2 (predicted)                                                                                     | LOC687772 // Rpp30   | 0.9±0.12   |
| ribonuclease, RNase A family 4                                                                                  | Rnaset2_predicted    | 5.81±0.94  |
| ribonuclease, RNase K                                                                                           | Rnase4               | 2.5±0.86   |
| ribonuclease/angiogenin inhibitor 1                                                                             | Rnasek               | 17.71±1.26 |
| ribonucleic acid binding protein S1                                                                             | Rnh1                 | 5.09±0.56  |
| ribonucleotide reductase M1                                                                                     | Rnps1                | 1.98±0.18  |
| ribonucleotide reductase M2                                                                                     | Rrm1                 | 2.72±0.38  |
| ribophorin I                                                                                                    | Rrm2                 | 2.48±0.62  |
| ribophorin II                                                                                                   | Rpn1                 | 11.52±1.27 |
| ribose 5-phosphate isomerase A (predicted)                                                                      | Rpn2                 | 17.89±2.42 |
|                                                                                                                 | Rpia_predicted       | 1.99±0.34  |

|                                                                                                                                |                                                     |            |
|--------------------------------------------------------------------------------------------------------------------------------|-----------------------------------------------------|------------|
| ribose-phosphate pyrophosphokinase I -like                                                                                     | LOC314140                                           | 0.99±0.14  |
| ribosomal L1 domain containing 1                                                                                               | Rsl1d1                                              | 1.99±0.24  |
| ribosomal protein L10                                                                                                          | Rpl10                                               | 24.78±0.6  |
| ribosomal protein L10A                                                                                                         | Rpl10a                                              | 11.02±0.54 |
| ribosomal protein L11                                                                                                          | Rpl11                                               | 26.17±1.53 |
| ribosomal protein L12 (predicted) /// similar to 60S ribosomal protein L12 /// similar to similar to 60S ribosomal protein L12 | LOC499782 /// LOC685320<br>/// LOC688511 ///        | 17.43±0.4  |
|                                                                                                                                | Rpl12_predicted                                     |            |
| ribosomal protein L13                                                                                                          | Rpl13                                               | 15.58±1.7  |
| ribosomal protein L13A                                                                                                         | Rpl13a                                              | 15.95±2.05 |
| ribosomal protein L14                                                                                                          | Rpl14                                               | 12.22±0.44 |
| ribosomal protein L15                                                                                                          | Rpl15                                               | 17.83±0.89 |
| ribosomal protein L17                                                                                                          | Rpl17                                               | 20.48±2.34 |
| ribosomal protein L18                                                                                                          | Rpl18                                               | 27.14±3.59 |
| ribosomal protein L18A                                                                                                         | Rpl18a                                              | 25.9±5.29  |
| ribosomal protein L19                                                                                                          | Rpl19                                               | 32.27±2.18 |
| ribosomal protein L21 /// similar to ribosomal protein L21                                                                     | LOC679852 /// LOC690841<br>/// Rpl21                | 13.61±1.82 |
| ribosomal protein L22                                                                                                          | Rpl22                                               | 22.93±1.15 |
| ribosomal protein L22 like 1 (predicted)                                                                                       | Rpl22l1_predicted                                   | 19.95±2.85 |
| ribosomal protein L23                                                                                                          | Rpl23                                               | 23.48±2.5  |
| ribosomal protein L23a                                                                                                         | Rpl23a                                              | 23.68±2.45 |
| ribosomal protein L24                                                                                                          | Rpl24                                               | 17.44±0.92 |
| ribosomal protein L26                                                                                                          | Rpl26                                               | 40.42±6.72 |
| ribosomal protein L27                                                                                                          | Rpl27                                               | 28.82±2.21 |
| ribosomal protein L27a (predicted)                                                                                             | Rpl27a_predicted                                    | 25.48±1.03 |
| ribosomal protein L28                                                                                                          | Rpl28                                               | 23.63±4.01 |
| ribosomal protein L29                                                                                                          | Rpl29                                               | 16.61±0.59 |
| ribosomal protein L3                                                                                                           | Rpl3                                                | 24.11±1.46 |
| ribosomal protein L3 /// similar to 60S ribosomal protein L3 (L4)                                                              | LOC499207 /// Rpl3                                  | 1.26±0.23  |
| ribosomal protein L30                                                                                                          | Rpl30                                               | 28.39±2.65 |
| ribosomal protein L31                                                                                                          | Rpl31                                               | 31.61±0.73 |
| ribosomal protein L32                                                                                                          | Rpl32                                               | 37.06±1.34 |
| ribosomal protein L34 (predicted)                                                                                              | Rpl34_predicted                                     | 19.86±0.38 |
| ribosomal protein L35                                                                                                          | Rpl35                                               | 24.89±1.61 |
| ribosomal protein L35a                                                                                                         | Rpl35a                                              | 24.09±1.42 |
| ribosomal protein L36                                                                                                          | LOC364105 ///                                       | 0.51±0.08  |
|                                                                                                                                | RGD1563135_predicted ///                            |            |
|                                                                                                                                | RGD1563687_predicted ///                            |            |
|                                                                                                                                | RGD1563867_predicted ///                            |            |
|                                                                                                                                | Rpl36                                               |            |
| ribosomal protein L37                                                                                                          | Rpl37                                               | 25.47±3.02 |
| ribosomal protein L37a /// similar to 60S ribosomal protein L37a                                                               | LOC679823 /// LOC687187<br>/// LOC689401 /// Rpl37a | 28.1±1.13  |
| ribosomal protein L4                                                                                                           | Rpl4                                                | 18.01±2.47 |
| ribosomal protein L41                                                                                                          | Rpl41                                               | 27.05±1.03 |
| ribosomal protein L5                                                                                                           | Rpl5                                                | 27.43±4.44 |
| ribosomal protein L6 /// similar to 60S ribosomal protein L6 (Neoplasm-related protein C140) (predicted)                       | RGD1563476_predicted ///                            | 21.64±0.55 |
| ribosomal protein L6                                                                                                           | Rpl6                                                |            |
| ribosomal protein L7                                                                                                           | Rpl7                                                | 37.02±5.51 |
| ribosomal protein L7a (predicted)                                                                                              | Rpl7a_predicted                                     | 37±1.92    |
| ribosomal protein L7-like 1                                                                                                    | Rpl7l1                                              | 2.94±0.22  |
| ribosomal protein L8                                                                                                           | Rpl8                                                | 17.39±0.93 |
| ribosomal protein L8 /// similar to 60S ribosomal protein L8 /// similar to 60S ribosomal protein L8 (predicted)               | LOC365370 ///                                       | 2.4±0.83   |
|                                                                                                                                | RGD1561333_predicted ///                            |            |
| ribosomal protein L9 /// EH-domain containing 2                                                                                | Rpl8                                                |            |
| ribosomal protein S10                                                                                                          | Ehd2 /// Rpl9                                       | 38.69±0.4  |
| ribosomal protein S11                                                                                                          | Rps10                                               | 17±3.05    |
| ribosomal protein S12                                                                                                          | Rps11                                               | 18.44±1.66 |
| ribosomal protein S13 /// similar to ribosomal protein S13                                                                     | Rps12                                               | 24.9±0.44  |
| ribosomal protein S14                                                                                                          | LOC684988 /// Rps13                                 | 28.7±0.34  |
| ribosomal protein S15                                                                                                          | Rps14                                               | 30.25±3.03 |
| ribosomal protein S15a                                                                                                         | Rps15                                               | 19.96±3.43 |
| ribosomal protein S16                                                                                                          | Rps15a                                              | 15.95±0.35 |
| ribosomal protein S17                                                                                                          | Rps16                                               | 26.81±3.72 |
| ribosomal protein S18                                                                                                          | Rps17                                               | 46.45±2.28 |
| ribosomal protein S19                                                                                                          | Rps18                                               | 45.68±1.73 |
| ribosomal protein S2                                                                                                           | Rps19                                               | 22.29±1.7  |
| ribosomal protein S2 /// similar to ribosomal protein S2 (predicted) /// similar to 40S ribosomal protein S2                   | Rps2                                                | 37.38±0.25 |
|                                                                                                                                | LOC688473 ///                                       | 37.58±3.44 |
|                                                                                                                                | RGD1559516_predicted ///                            |            |
| ribosomal protein S20                                                                                                          | Rps2                                                |            |
| ribosomal protein S21                                                                                                          | Rps20                                               | 33.88±2.24 |
| ribosomal protein S23                                                                                                          | Rps21                                               | 17.95±2.55 |
| ribosomal protein S24                                                                                                          | Rps23                                               | 27.61±3.02 |
| ribosomal protein s25                                                                                                          | Rps24                                               | 26±0.91    |
| ribosomal protein S26                                                                                                          | Rps25                                               | 9.19±1.02  |
| ribosomal protein S27                                                                                                          | Rps26                                               | 23.21±0.41 |
| ribosomal protein S27a                                                                                                         | Rps27                                               | 27.66±2.2  |
| ribosomal protein S28 /// similar to 40S ribosomal protein S28                                                                 | Rps27a                                              | 25.91±3.76 |
| ribosomal protein S29                                                                                                          | LOC684733 /// Rps28                                 | 28.27±2.92 |
| ribosomal protein S3                                                                                                           | Rps29                                               | 55.08±2.78 |
|                                                                                                                                | Rps3                                                | 17.43±0.85 |

|                                                                                                                         |                            |            |
|-------------------------------------------------------------------------------------------------------------------------|----------------------------|------------|
| ribosomal protein S3a                                                                                                   | Rps3a                      | 33.17±5.43 |
| ribosomal protein S4, X-linked                                                                                          | Rps4x                      | 32.34±3.3  |
| ribosomal protein S4, Y-linked 2                                                                                        | Rps4y2                     | 0.42±0.2   |
| ribosomal protein S5                                                                                                    | Rps5                       | 23.19±0.71 |
| ribosomal protein S6                                                                                                    | Rps6                       | 20.14±3.48 |
| ribosomal protein S6 kinase polypeptide 1                                                                               | Rps6ka1                    | 0.34±0.17  |
| ribosomal protein S6 kinase polypeptide 3                                                                               | Rps6ka3                    | 1.77±0.18  |
| ribosomal protein S6 kinase, 70kDa, polypeptide 1                                                                       | Rps6kb1                    | 0.72±0.26  |
| ribosomal protein S6 kinase, polypeptide 4                                                                              | Rps6ka4                    | 0.68±0.14  |
| ribosomal protein S7 /// similar to ribosomal protein S7                                                                | LOC497813 /// Rps7         | 17.16±1.04 |
| ribosomal protein S8                                                                                                    | Rps8                       | 21.64±0.65 |
| ribosomal protein S9                                                                                                    | Rps9                       | 21.83±1.61 |
| ribosomal protein SA                                                                                                    | Rpsa                       | 27.91±1.59 |
| ribosomal protein SA                                                                                                    | LOC367035 /// LOC683125    | 5.3±0.53   |
|                                                                                                                         | /// LOC688911 ///          |            |
|                                                                                                                         | RGD1563757_predicted ///   |            |
|                                                                                                                         | Rpsa                       |            |
| ribosomal protein, large P2 /// hypothetical gene supported by X15098 /// similar to 60S acidic ribosomal protein P2    | LOC363929 /// LOC498555    | 22.62±2.5  |
| ribosomal protein, large, P1                                                                                            | /// Rplp2                  |            |
| ribosomal RNA processing 1 homolog (S. cerevisiae)                                                                      | Rplp1                      | 43.08±3.24 |
| ribosomal RNA processing 1 homolog B (S. cerevisiae)                                                                    | Rrp1                       | 0.93±0.24  |
| ribosome binding protein 1                                                                                              | Rrp1b                      | 0.2±0.14   |
| ribulose-5-phosphate-3-epimerase                                                                                        | Rrbp1                      | 0.78±0.03  |
| RIM binding protein 2                                                                                                   | Rpe                        | 1.66±0.22  |
| ring finger (C3HC4 type) and KH domain containing 1 (predicted)                                                         | Rimbp2                     | 1.84±0.18  |
| ring finger 111                                                                                                         | Rkhd1_predicted            | 0.41±0.02  |
| ring finger and CHY zinc finger domain containing 1                                                                     | Rnf111                     | 1.29±0.15  |
| ring finger and FYVE like domain containing protein                                                                     | Rchy1                      | 6.04±0.74  |
| ring finger and KH domain containing 2 (predicted)                                                                      | Rffl                       | 0.4±0.03   |
| ring finger and WD repeat domain 3 /// similar to mixed lineage kinase domain-like                                      | Rkhd2_predicted            | 1.66±0.26  |
| ring finger protein (C3H2C3 type) 6 (predicted)                                                                         | LOC690743 /// Rfwd3        | 0.3±0.13   |
| ring finger protein 10                                                                                                  | Rnf6_predicted             | 1.63±0.14  |
| ring finger protein 103                                                                                                 | Rnf10                      | 2.55±0.78  |
| ring finger protein 11 (predicted)                                                                                      | Rnf103                     | 3.02±0.31  |
| ring finger protein 11 (predicted) /// similar to RING finger protein 11 (NEDD4 WW domain-binding protein 2) (Sid 1669) | Rnf11_predicted            | 0.79±0.11  |
|                                                                                                                         | LOC683844 ///              | 5.43±0.24  |
|                                                                                                                         | Rnf11_predicted            |            |
| ring finger protein 113A1                                                                                               | Rnf113a1                   | 0.47±0.14  |
| ring finger protein 113A2                                                                                               | Rnf113a2                   | 1.32±0.31  |
| ring finger protein 121 (predicted)                                                                                     | Rnf121_predicted           | 0.51±0.06  |
| ring finger protein 125 (predicted)                                                                                     | Rnf125_predicted           | 0.23±0.06  |
| ring finger protein 126                                                                                                 | Rnf126                     | 0.55±0.11  |
| ring finger protein 128 /// hypothetical protein LOC680663                                                              | LOC680663 /// Rnf128       | 8.79±1.14  |
| ring finger protein 135 /// ras homolog gene family, member T1 (predicted)                                              | Rhot1_predicted /// Rnf135 | 4.67±0.37  |
| ring finger protein 138                                                                                                 | Rnf138                     | 0.44±0.26  |
| ring finger protein 139 (predicted)                                                                                     | Rnf139_predicted           | 3.07±0.41  |
| ring finger protein 14                                                                                                  | Rnf14                      | 8.16±0.9   |
| ring finger protein 145                                                                                                 | Rnf145                     | 1.01±0.21  |
| ring finger protein 146                                                                                                 | Rnf146                     | 3.23±0.46  |
| ring finger protein 149                                                                                                 | Rnf149                     | 9.25±1.77  |
| ring finger protein 152 (predicted)                                                                                     | Rnf152_predicted           | 2.04±0.38  |
| ring finger protein 166                                                                                                 | Rnf166                     | 0.59±0.1   |
| ring finger protein 167                                                                                                 | Rnf167                     | 2.28±0.04  |
| ring finger protein 181                                                                                                 | Rnf181                     | 5.93±0.48  |
| ring finger protein 185                                                                                                 | Rnf185                     | 2.11±0.25  |
| ring finger protein 187 (predicted)                                                                                     | Rnf187_predicted           | 1.97±0.44  |
| ring finger protein 19A                                                                                                 | Rnf19a                     | 3.61±0.78  |
| ring finger protein 2                                                                                                   | Rnf2                       | 1.1±0.05   |
| ring finger protein 20 (predicted)                                                                                      | Rnf20_predicted            | 1.32±0.17  |
| ring finger protein 208                                                                                                 | Rnf208                     | 1.32±0.55  |
| ring finger protein 215                                                                                                 | Rnf215                     | 4.68±0.57  |
| ring finger protein 216                                                                                                 | Rnf216                     | 1.29±0.18  |
| ring finger protein 217                                                                                                 | Rnf217                     | 0.31±0.07  |
| ring finger protein 219                                                                                                 | Rnf219                     | 0.22±0.05  |
| ring finger protein 25                                                                                                  | Rnf25                      | 0.72±0.25  |
| ring finger protein 26 (predicted)                                                                                      | Rnf26_predicted            | 1.15±0.22  |
| ring finger protein 31 (predicted)                                                                                      | Rnf31_predicted            | 0.2±0.02   |
| ring finger protein 34                                                                                                  | Rnf34                      | 1.3±0.06   |
| ring finger protein 4                                                                                                   | Rnf4                       | 1.74±0.28  |
| ring finger protein 41                                                                                                  | Rnf41                      | 1.08±0.31  |
| Ring finger protein 44                                                                                                  | Rnf44                      | 1.59±0.61  |
| ring finger protein 7 (predicted)                                                                                       | Rnf7_predicted             | 4.69±0.45  |
| ring finger protein 8                                                                                                   | Rnf8                       | 0.63±0.02  |
| RING1 and YY1 binding protein (predicted)                                                                               | Rybp_predicted             | 1.6±0.67   |
| ring-box 1                                                                                                              | Rbx1                       | 9.82±0.64  |
| RIO kinase 1 (yeast)                                                                                                    | Riok1                      | 0.3±0.24   |
| RIO kinase 2 (yeast)                                                                                                    | Riok2                      | 0.57±0.08  |
| RIO kinase 3 (yeast) (predicted)                                                                                        | Riok3_predicted            | 7.38±0.59  |
| RMI1, RecQ mediated genome instability 1, homolog (S. cerevisiae)                                                       | Rmi1                       | 1.28±0.22  |
| RNA (guanine-7-) methyltransferase                                                                                      | Rnmt                       | 1.36±0.36  |
| RNA (guanine-9-) methyltransferase domain containing 1                                                                  | Rg9mtd1                    | 1.46±0.19  |
| RNA (guanine-9-) methyltransferase domain containing 3                                                                  | Rg9mtd3                    | 0.92±0.1   |
| RNA binding motif protein 10                                                                                            | Rbm10                      | 0.76±0.01  |
| RNA binding motif protein 12                                                                                            | Rbm12                      | 0.22±0.09  |
| RNA binding motif protein 12B                                                                                           | Rbm12b                     | 1.62±0.36  |



|                                                                                                  |                                                                                                                                         |            |
|--------------------------------------------------------------------------------------------------|-----------------------------------------------------------------------------------------------------------------------------------------|------------|
| RNA binding motif protein 13                                                                     | Rbm13                                                                                                                                   | 0.38±0.06  |
| RNA binding motif protein 15B (predicted)                                                        | Rbm15b_predicted                                                                                                                        | 0.25±0.15  |
| RNA binding motif protein 16                                                                     | Rbm16                                                                                                                                   | 1.99±0.34  |
| RNA binding motif protein 17                                                                     | Rbm17                                                                                                                                   | 2.62±0.29  |
| RNA binding motif protein 18 (predicted)                                                         | Rbm18_predicted                                                                                                                         | 1.9±0.32   |
| RNA binding motif protein 22                                                                     | Rbm22                                                                                                                                   | 1.02±0.12  |
| RNA binding motif protein 25 (predicted)                                                         | Rbm25_predicted                                                                                                                         | 1.62±0.32  |
| RNA binding motif protein 25 (predicted) /// similar to RNA binding motif protein 25 (predicted) | Rbm25_predicted ///                                                                                                                     | 1.69±0.11  |
|                                                                                                  | RGD1565486_predicted                                                                                                                    |            |
| RNA binding motif protein 27 (predicted)                                                         | Rbm27_predicted                                                                                                                         | 0.63±0.1   |
| RNA binding motif protein 3                                                                      | Rbm3                                                                                                                                    | 4.39±0.35  |
| RNA binding motif protein 34                                                                     | Rbm34                                                                                                                                   | 0.66±0.15  |
| RNA binding motif protein 38                                                                     | Rbm38                                                                                                                                   | 0.42±0.11  |
| RNA binding motif protein 39                                                                     | Rbm39                                                                                                                                   | 7.1±1.03   |
| RNA binding motif protein 42                                                                     | Rbm42                                                                                                                                   | 2.83±0.73  |
| RNA binding motif protein 45                                                                     | Rbm45                                                                                                                                   | 3.42±0.46  |
| RNA binding motif protein 4B                                                                     | Rbm4b                                                                                                                                   | 2.31±0.1   |
| RNA binding motif protein 5                                                                      | Rbm5                                                                                                                                    | 2.86±0.04  |
| RNA binding motif protein 6                                                                      | Rbm6                                                                                                                                    | 0.91±0.04  |
| RNA binding motif protein 8 (predicted)                                                          | Rbm8_predicted                                                                                                                          | 4.14±0.61  |
| RNA binding motif protein, X chromosome                                                          | Rbmx                                                                                                                                    | 1.37±0.2   |
| RNA binding motif protein, X chromosome retrogene (predicted)                                    | Rbmxt_predicted                                                                                                                         | 2.07±0.24  |
| RNA binding motif, single stranded interacting protein 2                                         | Rbms2                                                                                                                                   | 0.42±0.09  |
| RNA guanylyltransferase and 5'-phosphatase (predicted)                                           | Rngtt_predicted                                                                                                                         | 0.91±0.06  |
| RNA polymerase 1-1                                                                               | Rpo1-1                                                                                                                                  | 2.14±0.27  |
| RNA polymerase 1-2                                                                               | Rpo1-2                                                                                                                                  | 0.53±0.09  |
| RNA polymerase II associated protein 2                                                           | Rpap2                                                                                                                                   | 1.01±0.12  |
| RNA polymerase II associated protein 3                                                           | Rpap3                                                                                                                                   | 1.03±0.12  |
| RNA pseudouridylate synthase domain containing 3 (predicted)                                     | Rpusd3_predicted                                                                                                                        | 0.88±0.21  |
| RNA pseudouridylate synthase domain containing 4                                                 | Rpusd4                                                                                                                                  | 0.37±0.06  |
| RNA terminal phosphate cyclase domain 1                                                          | Rtcd1                                                                                                                                   | 6.68±0.46  |
| RNA terminal phosphate cyclase-like 1                                                            | Rcl1                                                                                                                                    | 1.02±0.14  |
| RNA U, small nuclear RNA export adaptor                                                          | Rnuxa                                                                                                                                   | 2.43±0.45  |
| rogdi homolog (Drosophila)                                                                       | Rogdi                                                                                                                                   | 7.27±1.35  |
| Ros1 proto-oncogene                                                                              | Ros1                                                                                                                                    | 0.41±0.07  |
| rosbin, round spermatid basic protein 1 (predicted)                                              | Rsbm1_predicted                                                                                                                         | 0.72±0.19  |
| roundabout homolog 3 (Drosophila) (predicted)                                                    | Robo3_predicted                                                                                                                         | 0.93±0.44  |
| Rous sarcoma oncogene                                                                            | Src                                                                                                                                     | 1.25±0.3   |
| RPA interacting protein                                                                          | Rpain                                                                                                                                   | 0.42±0.22  |
| RRN3 RNA polymerase I transcription factor homolog (yeast)                                       | Rm3                                                                                                                                     | 1.65±0.55  |
| rRNA promoter binding protein                                                                    | LOC257642                                                                                                                               | 7.53±1.05  |
| RRP9, small subunit (SSU) processome component, homolog (yeast)                                  | Rrp9                                                                                                                                    | 0.78±0.05  |
| RRS1 ribosome biogenesis regulator homolog (S. cerevisiae) (predicted)                           | Rrs1_predicted                                                                                                                          | 0.85±0.17  |
| RT1 class I, CE12                                                                                | RT1-CE12                                                                                                                                | 0.45±0.45  |
| RT1 class Ib gene, H2-TL-like, grc region (N3)                                                   | Dhx16 /// Ier3 /// Mrps18b<br>/// RGD1303066 /// RT1-<br>149 /// RT1-N2 /// RT1-N3<br>/// RT1-O /// RT1-S2 /// RT1-<br>S2 /// RT1-T24.1 | 4.88±0.42  |
|                                                                                                  | RT1-Aw2                                                                                                                                 | 6.39±2.24  |
| RT1 class Ib, locus Aw2                                                                          | Atp6v1g2 /// B3galt4 ///                                                                                                                | 3.63±0.46  |
|                                                                                                  | Cdsn /// Col11a2 /// Daxx ///                                                                                                           |            |
|                                                                                                  | Ddr1 /// Gtf2h4 /// Hcr ///                                                                                                             |            |
|                                                                                                  | Ke2 /// LOC682408 /// Lst1<br>/// Ltb /// Phf1 /// Pou5f1 ///                                                                           |            |
|                                                                                                  | Psors1c2 /// Rab2l /// RT1-<br>A1 /// RT1-A2 /// RT1-A3 ///                                                                             |            |
|                                                                                                  | RT1-Aw2 /// RT1-CE1 ///                                                                                                                 |            |
|                                                                                                  | RT1-CE10 /// RT1-CE11 ///                                                                                                               |            |
|                                                                                                  | RT1-CE12 /// RT1-CE13 ///                                                                                                               |            |
|                                                                                                  | RT1-CE14 /// RT1-CE15 ///                                                                                                               |            |
|                                                                                                  | RT1-CE16 /// RT1-CE2 ///                                                                                                                |            |
|                                                                                                  | RT1-CE3 /// RT1-CE4 ///                                                                                                                 |            |
|                                                                                                  | RT1-CE5 /// RT1-CE7 ///                                                                                                                 |            |
|                                                                                                  | RT1-CI /// RT1-DOa /// RT1-<br>Ha /// RT1-Ke4 /// Syngap1<br>/// Tapbp /// Tcf19 /// Vars2l<br>/// Wdr46 /// Zbtb9 ///                  |            |
|                                                                                                  | Zfn297                                                                                                                                  |            |
| RT1 class II, locus Ba                                                                           | RT1-Ba                                                                                                                                  | 5.06±2.15  |
| Rtf1, Paf1/RNA polymerase II complex component, homolog (S. cerevisiae) (predicted)              | Rtf1_predicted                                                                                                                          | 0.45±0.02  |
| RUN and FYVE domain containing 1                                                                 | Rufy1                                                                                                                                   | 5.83±1.19  |
| RUN and FYVE domain containing 3                                                                 | Rufy3                                                                                                                                   | 1.43±0.36  |
| RUN domain containing 1 (predicted)                                                              | Rundc1_predicted                                                                                                                        | 1.27±0.03  |
| RuvB-like protein 1                                                                              | Ruvb1                                                                                                                                   | 0.96±0.09  |
| RuvB-like protein 2                                                                              | Ruvb2                                                                                                                                   | 0.55±0.51  |
| RWD domain containing 2B                                                                         | Rwdd2b                                                                                                                                  | 2.88±0.52  |
| RWD domain containing 3                                                                          | Rwdd3                                                                                                                                   | 0.34±0.04  |
| RWD domain containing 4A                                                                         | Rwdd4a                                                                                                                                  | 5.79±0.55  |
| S1 RNA binding domain 1                                                                          | Srbd1                                                                                                                                   | 0.53±0.08  |
| S100 calcium binding protein A13 (predicted)                                                     | S100a13_predicted                                                                                                                       | 0.2±0.21   |
| S100 calcium binding protein A16 (predicted)                                                     | S100a16_predicted                                                                                                                       | 1.69±0.36  |
| S100 calcium binding protein G                                                                   | S100g                                                                                                                                   | 0.44±0.12  |
| SAC1 (suppressor of actin mutations 1, homolog)-like (S. cerevisiae)                             | Sacm1l                                                                                                                                  | 6.94±1.39  |
| saccharopine dehydrogenase (putative)                                                            | Sccpdh                                                                                                                                  | 12.21±0.73 |
| S-adenosylhomocysteine hydrolase                                                                 | Ahcy                                                                                                                                    | 6.25±0.61  |

|                                                                                                                              |                   |            |
|------------------------------------------------------------------------------------------------------------------------------|-------------------|------------|
| S-adenosylhomocysteine hydrolase-like 1 (predicted)                                                                          | Ahcy1_predicted   | 12.63±0.58 |
| S-adenosylhomocysteine hydrolase-like 2                                                                                      | Ahcy2             | 19.33±0.68 |
| S-adenosylmethionine decarboxylase 1                                                                                         | Amd1              | 5.89±1.05  |
| Sal-like 1 (Drosophila) (predicted)                                                                                          | Sall1_predicted   | 2.75±0.21  |
| salvador homolog 1 (Drosophila) (predicted)                                                                                  | Sav1_predicted    | 1.89±0.53  |
| SAP30-like                                                                                                                   | Sap30l            | 1.71±0.22  |
| SAPS domain family, member 1 (predicted)                                                                                     | Saps1_predicted   | 2.04±0.24  |
| SAPS domain family, member 2                                                                                                 | Saps2             | 0.96±0.08  |
| SAPS domain family, member 3 (predicted)                                                                                     | Saps3_predicted   | 4.87±0.74  |
| SAR1 gene homolog A (S. cerevisiae)                                                                                          | Sar1a             | 5.28±1.02  |
| SAR1 gene homolog B (S. cerevisiae)                                                                                          | Sar1b             | 13.59±0.99 |
| sarcoma antigen NY-SAR-48                                                                                                    | Ny-sar-48         | 0.24±0.15  |
| sarcosine dehydrogenase                                                                                                      | Sardh             | 3.76±0.66  |
| scaffold attachment factor B                                                                                                 | Safb              | 0.41±0.12  |
| SCAN domain-containing 1 (predicted)                                                                                         | Scand1_predicted  | 10.27±2.97 |
| scavenger receptor class B, member 2                                                                                         | Scarb2            | 0.47±0.05  |
| SCF apoptosis response protein 1                                                                                             | LOC499941         | 1.13±0.51  |
| Scm-like with four mbt domains 1                                                                                             | Sfmbt1            | 0.97±0.12  |
| scotin                                                                                                                       | MGC94600          | 0.57±0.17  |
| scratch homolog 1, zinc finger protein (Drosophila) (predicted)                                                              | Scrt1_predicted   | 0.2±0.08   |
| scribbled homolog (Drosophila)                                                                                               | Scrib             | 1.02±0.26  |
| SCY1-like 1 (S. cerevisiae)                                                                                                  | Scyl1             | 1.41±0.55  |
| SCY1-like 1 binding protein 1                                                                                                | Scyl1bp1          | 0.56±0.04  |
| SCY1-like 2 (S. cerevisiae) (predicted)                                                                                      | Scyl2_predicted   | 4.12±0.39  |
| SCY1-like 3 (S. cerevisiae)                                                                                                  | Scyl3             | 0.32±0.05  |
| SDA1 domain containing 1                                                                                                     | Sdad1             | 0.42±0.06  |
| sec1 family domain containing 1                                                                                              | Scfd1             | 3.11±0.6   |
| SEC11 homolog A (S. cerevisiae)                                                                                              | Sec11a            | 4.98±0.58  |
| SEC11 homolog C (S. cerevisiae)                                                                                              | Sec11c            | 3.58±0.64  |
| SEC13 homolog (S. cerevisiae)                                                                                                | Sec13             | 10.21±0.53 |
| SEC14 and spectrin domains 1                                                                                                 | Sestd1            | 4.07±0.13  |
| SEC16 homolog A (S. cerevisiae)                                                                                              | Sec16a            | 1.37±0.41  |
| SEC22 vesicle trafficking protein homolog A (S. cerevisiae)                                                                  | Sec22a            | 1.41±0.1   |
| SEC22 vesicle trafficking protein homolog B (S. cerevisiae)                                                                  | Sec22b            | 0.92±0.18  |
| SEC23 interacting protein                                                                                                    | Sec23ip           | 0.3±0.11   |
| SEC23A (S. cerevisiae) (predicted)                                                                                           | Sec23a_predicted  | 1.96±0.23  |
| SEC23B (S. cerevisiae) (predicted)                                                                                           | Sec23b_predicted  | 5.39±0.51  |
| SEC24 related gene family, member A (S. cerevisiae) (predicted)                                                              | Sec24a_predicted  | 2.88±0.21  |
| SEC24 related gene family, member B (S. cerevisiae) (predicted)                                                              | Sec24b_predicted  | 0.74±0.16  |
| SEC24 related gene family, member D (S. cerevisiae) (predicted)                                                              | Sec24d_predicted  | 4.6±0.17   |
| SEC31 homolog A (S. cerevisiae)                                                                                              | Sec31a            | 3.03±0.15  |
| SEC3-like 1 (S. cerevisiae)                                                                                                  | Sec3l1            | 3.31±0.21  |
| Sec61 alpha 1 subunit (S. cerevisiae)                                                                                        | Sec61a1           | 3.54±0.47  |
| Sec61 beta subunit (predicted)                                                                                               | Sec61b_predicted  | 8.21±0.77  |
| Sec61, alpha subunit 2 (S. cerevisiae) (predicted)                                                                           | Sec61a2_predicted | 4.12±0.53  |
| SEC63-like (S. cerevisiae) (predicted)                                                                                       | Sec63_predicted   | 3.28±0.17  |
| secernin 2                                                                                                                   | Scrn2             | 1.66±0.28  |
| SECIS binding protein 2                                                                                                      | Secisbp2          | 0.97±0.07  |
| secreted and transmembrane 1B                                                                                                | Sectm1b           | 0.99±0.25  |
| secreted phosphoprotein 1                                                                                                    | Spp1              | 5.1±2.76   |
| secreted phosphoprotein 2                                                                                                    | Spp2              | 63.59±6.25 |
| secretion regulating guanine nucleotide exchange factor                                                                      | Sergef            | 5.34±0.73  |
| secretory carrier membrane protein 1                                                                                         | Scamp1            | 2.73±0.24  |
| secretory carrier membrane protein 2                                                                                         | Scamp2            | 4.68±0.52  |
| secretory carrier membrane protein 3                                                                                         | Scamp3            | 4.4±0.46   |
| secretory carrier membrane protein 4                                                                                         | Scamp4            | 1.48±0.17  |
| sedlin-like                                                                                                                  | LOC287274         | 6.88±0.21  |
| sedoheptulokinase                                                                                                            | Shpk              | 3.52±0.58  |
| Sei1 (suppressor of lin-12) 1 homolog (C. elegans)                                                                           | Sei1h             | 4.78±0.58  |
| SEL1 domain containing protein RGD735029                                                                                     | RGD735029         | 3±0.06     |
| sel-1 suppressor of lin-12-like (C. elegans)                                                                                 | Sel1l             | 1.39±0.19  |
| selenium binding protein 1                                                                                                   | Selenbp1          | 13.71±1.84 |
| selenocysteine lyase                                                                                                         | Scly              | 22.77±0.96 |
| selenophosphate synthetase 1                                                                                                 | Seps1             | 4.82±0.26  |
| selenophosphate synthetase 2                                                                                                 | Seps2             | 13.32±1.59 |
| selenoprotein                                                                                                                | Sept15            | 16.1±0.48  |
| selenoprotein K                                                                                                              | Selk              | 9.71±1.28  |
| selenoprotein P, plasma, 1                                                                                                   | Sepp1             | 67.38±3.01 |
| selenoprotein S                                                                                                              | SELS              | 7.42±0.23  |
| selenoprotein T                                                                                                              | Selt              | 6.6±0.84   |
| sema domain, immunoglobulin domain (Ig), short basic domain, secreted, (semaphorin) 3B (predicted)                           | Sema3b_predicted  | 2.7±0.35   |
| sema domain, immunoglobulin domain (Ig), transmembrane domain (TM) and short cytoplasmic domain, (semaphorin) 4A             | Sema4a            | 3.16±0.1   |
| sema domain, immunoglobulin domain (Ig), transmembrane domain (TM) and short cytoplasmic domain, (semaphorin) 4B             | Sema4b            | 4.29±0.6   |
| sema domain, immunoglobulin domain (Ig), transmembrane domain (TM) and short cytoplasmic domain, (semaphorin) 4G (predicted) | Sema4g_predicted  | 0.63±0.03  |
| sema domain, transmembrane domain (TM), and cytoplasmic domain, (semaphorin) 6D (predicted)                                  | Sema6d_predicted  | 0.22±0.41  |
| septin 11                                                                                                                    | Sept11            | 2.74±0.5   |
| septin 14                                                                                                                    | Sept14            | 0.23±0.03  |
| septin 2                                                                                                                     | Sept2             | 4.1±0.45   |
| septin 7                                                                                                                     | sept7             | 6.88±0.56  |
| septin 8 (predicted)                                                                                                         | Sept8_predicted   | 1.29±0.28  |
| septin 9                                                                                                                     | Sept9             | 0.47±0.3   |
| sequestosome 1                                                                                                               | Sqstm1            | 17.26±1.53 |
| serine (or cysteine) peptidase inhibitor, clade C (antithrombin), member 1                                                   | Serpinc1          | 26.82±2.01 |
| serine (or cysteine) peptidase inhibitor, clade F, member 1                                                                  | Serpinf1          | 43.69±2.5  |
| serine (or cysteine) peptidase inhibitor, clade F, member 2                                                                  | Serpinf2          | 4.98±1.64  |
| serine (or cysteine) peptidase inhibitor, clade H, member 1                                                                  | Serpinh1          | 4.16±0.59  |

|                                                                                                                                     |                          |            |
|-------------------------------------------------------------------------------------------------------------------------------------|--------------------------|------------|
| serine (or cysteine) proteinase inhibitor, clade B, member 1a                                                                       | Serpinb1a                | 0.45±0.42  |
| serine carboxypeptidase 1                                                                                                           | Scepe1                   | 56.6±6.14  |
| serine hydroxymethyltransferase 1 (soluble)                                                                                         | Shmt1                    | 13.06±0.46 |
| serine hydroxymethyltransferase 2 (mitochondrial)                                                                                   | Shmt2                    | 17.99±0.24 |
| serine incorporator 1                                                                                                               | Serinc1                  | 27.39±1.31 |
| serine incorporator 3                                                                                                               | Serinc3                  | 10.56±1.18 |
| serine palmitoyltransferase, long chain base subunit 1 (predicted)                                                                  | Sptlc1_predicted         | 3.31±0.26  |
| serine peptidase inhibitor, Kazal type 3                                                                                            | Spink3                   | 48.73±8.08 |
| serine protease inhibitor, Kazal type 1                                                                                             | Spink1                   | 2.86±0.19  |
| serine protease inhibitor, Kunitz type 1                                                                                            | Spint1                   | 1.18±0.17  |
| serine protease inhibitor, Kunitz type 2                                                                                            | Spint2                   | 11.19±1.12 |
| serine racemase                                                                                                                     | Srr                      | 2.08±0.18  |
| serine/arginine repetitive matrix 1 (predicted)                                                                                     | Srrm1_predicted          | 1.46±0.35  |
| serine/arginine repetitive matrix 2 (predicted)                                                                                     | Srrm2_predicted          | 6.76±2.87  |
| Serine/arginine-rich protein specific kinase 1                                                                                      | Srp1                     | 0.5±0.15   |
| serine/arginine-rich protein specific kinase 2 (predicted)                                                                          | Srp1_predicted           | 1.39±0.26  |
| serine/threonine kinase 11 interacting protein (predicted)                                                                          | Stk11ip_predicted        | 0.69±0.18  |
| serine/threonine kinase 16                                                                                                          | Stk16                    | 3.03±0.1   |
| serine/threonine kinase 17b (apoptosis-inducing)                                                                                    | Stk17b                   | 0.22±0.14  |
| Serine/threonine kinase 2                                                                                                           | Slk                      | 0.59±0.11  |
| serine/threonine kinase 22 substrate 1 /// interferon regulatory factor 3                                                           | Irf3 /// Stk22s1         | 5.68±0.52  |
| serine/threonine kinase 24 (STE20 homolog, yeast)                                                                                   | Stk24                    | 8.12±0.61  |
| serine/threonine kinase 25 (STE20 homolog, yeast)                                                                                   | Stk25                    | 1.92±0.26  |
| serine/threonine kinase 3 (STE20 homolog, yeast)                                                                                    | Stk3                     | 3.88±0.42  |
| serine/threonine kinase 38                                                                                                          | Stk38                    | 0.97±0.13  |
| serine/threonine kinase 4 (predicted)                                                                                               | Stk4_predicted           | 0.79±0.58  |
| serine/threonine kinase 40                                                                                                          | Stk40                    | 0.68±0.12  |
| serine/threonine kinase receptor associated protein                                                                                 | Strap                    | 9.8±0.64   |
| serine/threonine/tyrosine interacting-like 1                                                                                        | Styx1                    | 0.64±0.24  |
| serologically defined colon cancer antigen 1                                                                                        | Sdccag1                  | 2.89±0.4   |
| serologically defined colon cancer antigen 10                                                                                       | Sdccag10                 | 5.86±0.68  |
| serologically defined colon cancer antigen 3                                                                                        | Sdccag3                  | 2.73±0.08  |
| Serpine1 mRNA binding protein 1                                                                                                     | Serbp1                   | 11.26±0.99 |
| SERTA domain containing 1                                                                                                           | Sertad1                  | 1.44±0.3   |
| SERTA domain containing 2                                                                                                           | Sertad2                  | 1.57±0.39  |
| serum amyloid P-component                                                                                                           | Apcs                     | 47.85±6.28 |
| serum response factor (predicted)                                                                                                   | Srf_predicted            | 0.89±0.29  |
| serum response factor binding protein 1                                                                                             | Srfbp1                   | 2.04±0.06  |
| serum/glucocorticoid regulated kinase                                                                                               | Sgk                      | 27.1±4.45  |
| seryl-aminoacyl-tRNA synthetase                                                                                                     | Sars                     | 3.13±0.46  |
| seryl-aminoacyl-tRNA synthetase 2                                                                                                   | Sars2                    | 0.2±0.05   |
| sestrin 1 (predicted)                                                                                                               | Sesn1_predicted          | 2.75±0.34  |
| sestrin 3 (predicted)                                                                                                               | Sesn3_predicted          | 0.74±0.11  |
| SET and MYND domain containing 2                                                                                                    | Smyd2                    | 2.22±0.07  |
| SET and MYND domain containing 3                                                                                                    | Smyd3                    | 0.4±0.04   |
| SET and MYND domain containing 4 (predicted)                                                                                        | Smyd4_predicted          | 0.62±0.14  |
| SET binding factor 1 (predicted)                                                                                                    | Sbf1_predicted           | 1.14±0.26  |
| SET domain and mariner transposase fusion gene                                                                                      | Setmar                   | 0.43±0.14  |
| SET domain containing (lysine methyltransferase) 8 /// similar to SET domain-containing protein                                     | LOC687538 /// LOC689820  | 3.75±0.62  |
|                                                                                                                                     | /// Setd8                |            |
| SET domain containing 2                                                                                                             | Setd2                    | 0.68±0.17  |
| SET domain containing 3                                                                                                             | Setd3                    | 6.61±0.98  |
| SET domain containing 4                                                                                                             | Setd4                    | 0.56±0.13  |
| SET domain containing 5                                                                                                             | Setd5                    | 0.34±0.06  |
| SET domain containing 6                                                                                                             | Setd6                    | 1.44±0.12  |
| SET domain, bifurcated 1 (predicted)                                                                                                | Setdb1_predicted         | 1.11±0.19  |
| SET translocation (predicted)                                                                                                       | Set_predicted            | 4.8±0.87   |
| SET translocation (predicted)                                                                                                       | LOC502130 ///            | 4.39±0.08  |
|                                                                                                                                     | RGD1562760_predicted /// |            |
|                                                                                                                                     | Set predicted            |            |
| seven in absentia 1A                                                                                                                | Siah1a                   | 0.39±0.02  |
| seven in absentia 2                                                                                                                 | Siah2                    | 0.28±0.13  |
| sex comb on midleg homolog 1 (predicted)                                                                                            | Scmh1_predicted          | 0.31±0.23  |
| sex hormone binding globulin                                                                                                        | Shbg                     | 0.33±0.06  |
| SFT2 domain containing 1                                                                                                            | Sft2d1                   | 5.11±0.3   |
| SFT2 domain containing 2                                                                                                            | Sft2d2                   | 3.32±0.31  |
| SFT2 domain containing 3                                                                                                            | Sft2d3                   | 0.61±0.16  |
| SGT1, suppressor of G2 allele of SKP1 (S. cerevisiae)                                                                               | Sugt1                    | 3.21±0.24  |
| SH2 domain containing phosphatase anchor protein 1 (predicted)                                                                      | Spap1_predicted          | 1.54±0.1   |
| SH2-B PH domain containing signaling mediator 1                                                                                     | Sh2bpsm1                 | 2.21±0.28  |
| SH3 domain and tetratricopeptide repeats 1 (predicted)                                                                              | Sh3tc1_predicted         | 4.82±0.05  |
| SH3 domain and tetratricopeptide repeats 2                                                                                          | Sh3tc2                   | 1.75±0.33  |
| Sh3 domain YSC-like 1 (predicted)                                                                                                   | Sh3y1_predicted          | 2.6±0.13   |
| SH3/ankyrin domain gene 2                                                                                                           | Shank2                   | 0.63±0.27  |
| SH3-binding domain glutamic acid-rich protein like (predicted)                                                                      | Sh3bgr1_predicted        | 0.7±0.27   |
| SH3-domain binding protein 5 (BTK-associated)                                                                                       | Sh3bp5                   | 2.17±0.3   |
| SH3-domain GRB2-like 1                                                                                                              | Sh3g1                    | 0.48±0.09  |
| SH3-domain GRB2-like B1 (endophilin)                                                                                                | Sh3glb1                  | 0.82±0.07  |
| SH3-domain GRB2-like endophilin B2                                                                                                  | Sh3glb2                  | 0.3±0.14   |
| Sh3kbp1 binding protein 1 (predicted)                                                                                               | Shkbp1_predicted         | 0.67±0.09  |
| SHANK-associated RH domain interacting protein                                                                                      | Sharpin                  | 2.78±0.4   |
| short coiled-coil protein                                                                                                           | Scoc                     | 14.9±0.71  |
| SHQ1 homolog (S. cerevisiae) (predicted)                                                                                            | Shq1_predicted           | 0.35±0.01  |
| shroom family member 2                                                                                                              | Shroom2                  | 2.61±0.48  |
| Shwachman-Bodian-Diamond syndrome homolog (human)                                                                                   | Sbds                     | 3.42±0.4   |
| siah binding protein 1; FBP interacting repressor; pyrimidine tract binding splicing factor; Ro ribonucleoprotein-binding protein 1 | Siahbp1                  | 1.96±0.57  |
| sialic acid acetyltransferase (predicted)                                                                                           | Siae_predicted           | 5.02±0.82  |

|                                                                                                                                |                         |            |
|--------------------------------------------------------------------------------------------------------------------------------|-------------------------|------------|
| SID1 transmembrane family, member 2 (predicted)                                                                                | Sidt2_predicted         | 4.83±0.94  |
| sideroflexin 1                                                                                                                 | Sfxn1                   | 19.3±0.54  |
| sideroflexin 4 (predicted)                                                                                                     | Sfxn4_predicted         | 0.48±0.12  |
| sideroflexin 5                                                                                                                 | Sfxn5                   | 0.57±0.06  |
| signal peptidase complex subunit 2 homolog (S. cerevisiae) (predicted)                                                         | Spcs2_predicted         | 4.08±0.51  |
| signal peptide peptidase 3                                                                                                     | Sppl3                   | 1.4±0.86   |
| signal peptide peptidase-like 2A                                                                                               | Sppl2a                  | 2.77±0.16  |
| signal peptide peptidase-like 2B                                                                                               | Sppl2b                  | 0.76±0.05  |
| signal recognition particle 14 (predicted)                                                                                     | Srp14_predicted         | 10.23±0.91 |
| signal recognition particle 19 (predicted)                                                                                     | Srp19_predicted         | 1.6±0.48   |
| signal recognition particle 54                                                                                                 | Srp54                   | 4.34±0.5   |
| signal recognition particle 68 (predicted)                                                                                     | Srp68_predicted         | 3.17±0.39  |
| signal recognition particle 72                                                                                                 | Srp72                   | 3.56±0.07  |
| signal recognition particle receptor ('docking protein')                                                                       | Srpr                    | 5.2±0.25   |
| signal recognition particle receptor, B subunit                                                                                | Srprb                   | 4.29±0.81  |
| signal sequence receptor, alpha                                                                                                | Ssr1                    | 4.28±0.67  |
| signal sequence receptor, beta (predicted)                                                                                     | Ssr2_predicted          | 4.93±0.32  |
| signal sequence receptor, delta                                                                                                | Ssr4                    | 8.7±1.11   |
| signal sequence receptor, gamma                                                                                                | Ssr3                    | 18.82±1.05 |
| signal transducer and activator of transcription 1                                                                             | Stat1                   | 3.43±0.1   |
| signal transducer and activator of transcription 2                                                                             | Stat2                   | 0.34±0.12  |
| signal transducer and activator of transcription 3                                                                             | Stat3                   | 0.92±0.39  |
| signal transducer and activator of transcription 5B                                                                            | Stat5b                  | 0.33±0.13  |
| signal-induced proliferation-associated 1 like 1                                                                               | Sipa11                  | 0.69±0.23  |
| signal-regulatory protein alpha                                                                                                | Sirpa                   | 0.73±0.02  |
| similar to 0610007L01Rik protein                                                                                               | MGC94190                | 6.81±0.68  |
| similar to 0610010K06Rik protein                                                                                               | RGD1307161              | 3.27±0.24  |
| Similar to 106 kDa O-GlcNAc transferase-interacting protein (predicted)                                                        | RGD1307844_predicted    | 2.16±0.17  |
| similar to 1110008L16Rik protein (predicted)                                                                                   | RGD1305089_predicted    | 1.47±0.15  |
| similar to 1500019C06Rik protein (predicted)                                                                                   | RGD1560433_predicted    | 0.3±0.05   |
| similar to 1700019E19Rik protein (predicted)                                                                                   | RGD1307392_predicted    | 0.77±0.23  |
| similar to 1700123O20Rik protein (predicted)                                                                                   | RGD1308430_predicted    | 1.26±0.03  |
| similar to 2010004A03Rik protein (predicted) /// similar to 2010004A03Rik protein                                              | LOC498951 ///           | 2.22±0.16  |
|                                                                                                                                | RGD1305691_predicted    |            |
| similar to 2010321M09Rik protein                                                                                               | RGD1359616              | 1.77±0.25  |
| similar to 20-alpha-hydroxysteroid dehydrogenase (predicted)                                                                   | RGD1564865_predicted    | 29.62±2.05 |
| similar to 2210021J22Rik protein (predicted)                                                                                   | RGD1306001_predicted    | 0.47±0.07  |
| similar to 2310044H10Rik protein                                                                                               | MGC93975                | 2.15±0.43  |
| similar to 2310047B19Rik protein (predicted)                                                                                   | RGD1308026_predicted    | 1.11±0.13  |
| similar to 2410001C21Rik protein                                                                                               | RGD1311072              | 1.99±0.11  |
| similar to 2410024A21Rik protein                                                                                               | RGD1304878              | 1.95±0.22  |
| similar to 2610030H06Rik protein (predicted)                                                                                   | RGD1566155_predicted    | 0.69±0.06  |
| similar to 2610301G19Rik protein (predicted)                                                                                   | RGD1309922_predicted    | 0.94±0.28  |
| similar to 2610317D23Rik protein (predicted)                                                                                   | RGD1565411_predicted    | 0.59±0.19  |
| similar to 2700029M09Rik protein (predicted)                                                                                   | RGD1311747_predicted    | 2.13±0.33  |
| similar to 2700078E11Rik protein                                                                                               | RGD1308127              | 3.08±0.02  |
| similar to 2810422O20Rik protein                                                                                               | RGD1306783              | 0.77±0.13  |
| similar to 2900002H16Rik protein (predicted)                                                                                   | RGD1307973_predicted    | 1.16±0.2   |
| similar to 3000004C01Rik protein                                                                                               | RGD1310360              | 0.23±0.05  |
| similar to 3110080A02Rik protein (predicted)                                                                                   | RGD1305754_predicted    | 0.38±0.07  |
| similar to 3-oxoacid CoA transferase 1                                                                                         | LOC678860               | 42.23±5.28 |
| similar to 4632419K20Rik protein                                                                                               | MGC94288                | 0.68±0.07  |
| similar to 4921517L17Rik protein                                                                                               | RGD1311678              | 0.99±0.07  |
| similar to 4930429A08Rik protein (predicted)                                                                                   | RGD1564943_predicted    | 1.11±0.21  |
| similar to 4930431B09Rik protein                                                                                               | LOC310721               | 2.39±0.23  |
| similar to 4930453N24Rik protein                                                                                               | MGC95208                | 1.1±0.09   |
| Similar to 4930566A11Rik protein (predicted)                                                                                   | RGD1306674_predicted    | 0.24±0.04  |
| similar to 4931417G12Rik protein (predicted)                                                                                   | RGD1565997_predicted    | 1.3±0.19   |
| similar to 5(3)-deoxyribonucleotidase, cytosolic type (Cytosolic 5,3-pyrimidine nucleotidase) (Deoxy-5-nucleotidase 1) (dNT-1) | LOC688261               | 0.36±0.06  |
| similar to 5730403M16Rik protein                                                                                               | LOC308320               | 0.3±0.06   |
| Similar to 5730420B22Rik protein (predicted)                                                                                   | RGD1306755_predicted    | 2±0.32     |
| similar to 5930416I19Rik protein                                                                                               | MGC94282                | 0.53±0.09  |
| similar to 5-nucleotidase, cytosolic II                                                                                        | LOC365090               | 3.25±0.32  |
| similar to 6.8 kDa mitochondrial proteolipid                                                                                   | LOC691427               | 26.77±1.08 |
| similar to 60S ribosomal protein L38 /// ribosomal protein L38 /// 60S ribosomal protein L38 pseudogene                        | LOC681221 /// LOC681502 | 33.73±2.8  |
|                                                                                                                                | /// LOC682793 ///       |            |
|                                                                                                                                | LOC685963 /// LOC688248 |            |
|                                                                                                                                | /// LOC689671 ///       |            |
|                                                                                                                                | LOC690468 /// LOC690833 |            |
|                                                                                                                                | /// Rpl38               |            |
| similar to 82-kD FMRP Interacting Protein                                                                                      | LOC687994               | 0.43±0.01  |
| similar to 9130011E15Rik protein (predicted)                                                                                   | RGD1564887_predicted    | 0.58±0.09  |
| similar to 9230105E10Rik protein                                                                                               | RGD1304579              | 1.19±0.19  |
| similar to 9530008L14Rik protein                                                                                               | RGD1305679              | 5.64±0.85  |
| similar to 9630058J23Rik protein (predicted)                                                                                   | RGD1564833_predicted    | 2.07±0.19  |
| Similar to a disintegrin and metalloprotease domain 4                                                                          | LOC500688               | 2.6±0.55   |
| similar to Aa2-174                                                                                                             | RGD1309578              | 1.11±0.02  |
| similar to Acyl-CoA dehydrogenase family member 8, mitochondrial precursor (ACAD-8) (predicted)                                | RGD1564209_predicted    | 1.64±0.11  |
| similar to Acylphosphatase, muscle type isozyme (Acylphosphate phosphohydrolase)                                               | LOC682245               | 1.78±0.14  |
| similar to Adenosine deaminase CG11994-PA                                                                                      | LOC311352               | 0.32±0.07  |
| similar to adipocyte-specific protein 4                                                                                        | RGD1308813              | 5.08±0.99  |
| similar to ADP-ribosylation factor GTPase-activating protein 3 (ARF GAP 3)                                                     | LOC503165               | 1.02±0.18  |
| similar to ADP-ribosylation factor-like 1                                                                                      | LOC688311               | 0.52±0.21  |
| similar to AHA1, activator of heat shock 90kDa protein ATPase homolog 1                                                        | LOC681996               | 4.22±0.4   |
| Similar to AL023001 protein (predicted)                                                                                        | RGD1305001_predicted    | 3.05±0.58  |

|                                                                                                                                                                   |                         |            |
|-------------------------------------------------------------------------------------------------------------------------------------------------------------------|-------------------------|------------|
| similar to alcohol dehydrogenase PAN2 (predicted)                                                                                                                 | RGD1565196_predicted    | 3.27±0.71  |
| similar to Alpha- and gamma-adaptin-binding protein p34                                                                                                           | LOC498912               | 1.13±0.31  |
| Similar to alternative testis transcripts open reading frame A CG4241-PA, isoform A                                                                               | LOC689414               | 0.97±0.19  |
| similar to anaphase promoting complex subunit 13                                                                                                                  | LOC685029               | 5.59±1.33  |
| Similar to ankyrin repeat and SOCs box-containing protein 5                                                                                                       | LOC361187               | 0.24±0.04  |
| similar to ankyrin repeat domain 40                                                                                                                               | LOC688144               | 2.67±0.19  |
| Similar to AP2 associated kinase 1 (predicted)                                                                                                                    | RGD1563580_predicted    | 0.6±0.25   |
| similar to AP-3 complex subunit sigma-2 (Adapter-related protein complex 3 sigma-2 subunit) (Sigma-adaptin 3b) (AP-3 complex sigma-3B subunit) (Sigma-3B-adaptin) | LOC683402               | 3.88±0.39  |
| Similar to APG4 autophagy 4 homolog C                                                                                                                             | LOC313391               | 2.5±0.38   |
| similar to APG4-D protein                                                                                                                                         | LOC686505               | 0.83±0.1   |
| similar to apoptosis related protein APR-3; p18 protein (predicted)                                                                                               | RGD1311605_predicted    | 2.68±0.26  |
| similar to arginyl aminopeptidase (aminopeptidase B)-like 1                                                                                                       | LOC684035               | 3.21±1.22  |
| similar to arsenate resistance protein 2                                                                                                                          | LOC686980               | 1.36±0.26  |
| similar to ATP synthase, H+ transporting, mitochondrial F0 complex, subunit f, isoform 2                                                                          | LOC684567               | 42.65±1.9  |
| similar to ATP-binding cassette, sub-family G (WHITE), member 3                                                                                                   | LOC360997               | 1.43±0.08  |
| similar to autophagy 5-like                                                                                                                                       | LOC365601               | 2.1±0.29   |
| similar to B0511.12                                                                                                                                               | LOC690217               | 1.24±0.15  |
| similar to Basic FGF-repressed Zic-binding protein (mbFZb)                                                                                                        | LOC683512               | 1.82±0.24  |
| similar to BC003940 protein (predicted)                                                                                                                           | RGD1311925_predicted    | 1.31±0.32  |
| Similar to BC021442 protein (predicted)                                                                                                                           | RGD1561413_predicted    | 0.37±0.12  |
| similar to BC068281 protein (predicted)                                                                                                                           | RGD1563701_predicted    | 0.44±0.05  |
| Similar to B-cell CLL/lymphoma 7A                                                                                                                                 | LOC690085               | 0.75±0.5   |
| Similar to Bcl2-associated athanogene 2                                                                                                                           | LOC690038               | 0.83±0.27  |
| Similar to bK1191B2.3.1 (PUTATIVE novel Acyl Transferase similar to C. elegans C50D2.7) (variant 1) (predicted)                                                   | RGD1306698_predicted    | 1.14±0.16  |
| similar to BMP-2 inducible kinase                                                                                                                                 | LOC289485               | 1.51±0.08  |
| similar to Brain protein 44 (predicted)                                                                                                                           | RGD1563422_predicted    | 28.36±2.58 |
| similar to BRCA1-associated protein (BRAP2) (Impedes mitogenic signal propagation) (IMP)                                                                          | LOC687346               | 0.54±0.12  |
| Similar to Breast carcinoma amplified sequence 3 homolog (K20D4) (predicted)                                                                                      | RGD1560788_predicted    | 1.1±0.26   |
| similar to Butyrate-induced transcript 1 (predicted)                                                                                                              | RGD1565496_predicted    | 2.35±0.2   |
| similar to C184L-22 /// Sjogren's syndrome/scleroderma autoantigen 1                                                                                              | LOC684594 /// Sssca1    | 0.95±0.18  |
| similar to C1orf25                                                                                                                                                | RGD1307890              | 0.86±0.12  |
| similar to C21ORF7                                                                                                                                                | LOC304131               | 0.2±0.09   |
| similar to C21orf70 protein                                                                                                                                       | RGD1311257              | 0.51±0.03  |
| similar to C530044N13Rik protein                                                                                                                                  | RGD1306568              | 4.77±0.43  |
| Similar to calmodulin-like 4                                                                                                                                      | LOC691455               | 39.03±1.65 |
| similar to capping protein (actin filament) muscle Z-line, alpha 1                                                                                                | LOC691149               | 5.3±0.43   |
| Similar to CCAAT displacement protein isoform b                                                                                                                   | Cutl1                   | 4.86±0.49  |
| similar to cDNA sequence AF155546                                                                                                                                 | RGD1309387              | 0.67±0.11  |
| similar to cDNA sequence AF397014                                                                                                                                 | RGD1308114              | 4.1±0.37   |
| similar to cDNA sequence BC005537                                                                                                                                 | LOC498750               | 6.05±0.53  |
| Similar to cDNA sequence BC006662                                                                                                                                 | RGD1304748              | 4.09±0.03  |
| similar to cDNA sequence BC013529 (predicted)                                                                                                                     | RGD1309759_predicted    | 7.47±0.65  |
| similar to cDNA sequence BC017158                                                                                                                                 | RGD1310127              | 0.43±0.09  |
| similar to cDNA sequence BC017647 (predicted)                                                                                                                     | RGD1566149_predicted    | 0.72±0.12  |
| similar to cDNA sequence BC020002 (predicted)                                                                                                                     | RGD1308432_predicted    | 0.41±0.13  |
| similar to cDNA sequence BC021608                                                                                                                                 | MGC95155                | 8.51±1.08  |
| similar to cDNA sequence BC024479                                                                                                                                 | LOC500974               | 0.35±0.18  |
| similar to cDNA sequence BC024814 (predicted)                                                                                                                     | RGD1311433_predicted    | 0.26±0.17  |
| similar to cDNA sequence BC031181 (predicted)                                                                                                                     | RGD1562987_predicted    | 8.62±0.83  |
| similar to cDNA sequence BC056474 (predicted)                                                                                                                     | RGD1564058_predicted    | 6.64±0.16  |
| similar to CDV-3B                                                                                                                                                 | LOC315970               | 0.3±0.15   |
| similar to Cell division protein kinase 8 (Protein kinase K35) (predicted)                                                                                        | RGD1560888_predicted    | 1.47±0.11  |
| similar to centrosome protein Cep63                                                                                                                               | LOC300963               | 0.43±0.08  |
| similar to cervical cancer receptor (predicted)                                                                                                                   | RGD1310591_predicted    | 2.46±0.33  |
| similar to CG10084-PA                                                                                                                                             | RGD1308297              | 5.88±0.59  |
| similar to CG11206-PA                                                                                                                                             | LOC313672               | 0.21±0.03  |
| similar to CG12279-PA                                                                                                                                             | LOC500420               | 1.86±0.45  |
| similar to CG12379-PA (predicted)                                                                                                                                 | RGD1308635_predicted    | 1.27±0.21  |
| similar to CG12929-PA                                                                                                                                             | LOC682404               | 0.78±0.59  |
| similar to CG12935-PA                                                                                                                                             | LOC686289 /// LOC690285 | 5.51±0.62  |
| similar to CG13901-PA                                                                                                                                             | RGD1307648              | 2.05±0.2   |
| Similar to CG13957-PA (predicted)                                                                                                                                 | RGD1309995_predicted    | 12.02±1.22 |
| similar to CG14286-PA                                                                                                                                             | LOC686765               | 1.04±0.16  |
| similar to CG14483-PA                                                                                                                                             | LOC681884               | 2.24±0.24  |
| similar to CG14903-PA (predicted)                                                                                                                                 | RGD1561792_predicted    | 0.96±0.08  |
| similar to CG14967-PA                                                                                                                                             | RGD1307929              | 11.43±1.04 |
| similar to CG14977-PA (predicted)                                                                                                                                 | RGD1309735_predicted    | 7.24±1.17  |
| similar to CG14980-PB                                                                                                                                             | RGD1306410              | 6.01±0.64  |
| similar to CG16812-PA (predicted)                                                                                                                                 | RGD1307554_predicted    | 0.21±0.01  |
| similar to CG18661-PA                                                                                                                                             | RGD1307155              | 3.06±0.76  |
| similar to CG31122-PA (predicted)                                                                                                                                 | RGD1306941_predicted    | 2.24±0.07  |
| similar to CG31613-PA                                                                                                                                             | LOC684841               | 1.24±0.08  |
| Similar to CG31759-PA                                                                                                                                             | RGD1310975              | 0.73±0.03  |
| similar to CG33331-PA                                                                                                                                             | LOC362419               | 0.68±0.13  |
| similar to CG33714-PB, isoform B                                                                                                                                  | LOC688717               | 4.43±0.55  |
| similar to CG3570-PA                                                                                                                                              | LOC500034               | 2.7±0.12   |
| Similar to CG3740-PA                                                                                                                                              | LOC690000               | 4.28±0.11  |
| similar to CG4751-PA                                                                                                                                              | LOC681944               | 1.44±0.5   |
| similar to CG4768-PA (predicted)                                                                                                                                  | RGD1309748_predicted    | 2.35±0.42  |
| similar to CG5500-PA                                                                                                                                              | LOC688310               | 0.83±0.09  |
| similar to CG5987-PA (predicted) /// mesenchymal stem cell protein DSC92                                                                                          | Ngrn ///                | 1.69±0.04  |
| similar to CG6105-PA                                                                                                                                              | RGD1310399_predicted    | 37.23±2.22 |
| similar to CG6878-PA                                                                                                                                              | MGC72942                | 9.6±2.24   |
| similar to CG8043-PA (predicted)                                                                                                                                  | LOC679572               | 9.6±2.24   |
|                                                                                                                                                                   | RGD1306000_predicted    | 0.59±0.14  |

|                                                                                                                                                                            |                          |            |
|----------------------------------------------------------------------------------------------------------------------------------------------------------------------------|--------------------------|------------|
| similar to CG8272-PA                                                                                                                                                       | LOC502201                | 0.46±0.06  |
| similar to CG9117-PA                                                                                                                                                       | RGD1306932               | 0.38±0.08  |
| similar to CG9240-PA                                                                                                                                                       | LOC687395                | 3.12±0.11  |
| similar to CG9346-PA (predicted)                                                                                                                                           | RGD1307882_predicted     | 3.49±0.69  |
| similar to CG9752-PA                                                                                                                                                       | RGD1311345               | 7.96±0.93  |
| similar to CG9882-PA (predicted)                                                                                                                                           | RGD1306157_predicted     | 0.47±0.1   |
| similar to CG9886-like                                                                                                                                                     | LOC684314                | 7.72±0.56  |
| similar to CG9967-PA, isoform A                                                                                                                                            | LOC678910                | 0.21±0.03  |
| Similar to CG9996-PA                                                                                                                                                       | LOC300173                | 0.64±0.28  |
| similar to CGI-35 protein (predicted)                                                                                                                                      | RGD1310899_predicted     | 7.03±0.9   |
| similar to Chain A, Solution Structure Of The Bola-Like Protein From Mus Musculus (predicted)                                                                              | RGD1309998_predicted /// | 3.03±0.93  |
|                                                                                                                                                                            | RGD1565363_predicted     |            |
| similar to channel-interacting PDZ domain protein isoform 1 (predicted)                                                                                                    | RGD1565362_predicted     | 3.03±0.21  |
| similar to chr2 synaptotagmin (predicted)                                                                                                                                  | RGD1565705_predicted     | 0.52±0.15  |
| similar to chromosome 1 open reading frame 172                                                                                                                             | RGD1303271               | 0.65±0.1   |
| similar to chromosome 1 open reading frame 50 (predicted)                                                                                                                  | RGD1564804_predicted     | 0.65±0.09  |
| similar to chromosome 1 open reading frame 63                                                                                                                              | RGD1359529               | 15.27±2.98 |
| similar to chromosome 10 open reading frame 18 (predicted)                                                                                                                 | RGD1564456_predicted     | 1.74±0.28  |
| similar to chromosome 10 open reading frame 4; similar to putative acid phosphatase F26C11.1                                                                               | RGD1309482               | 0.77±0.07  |
| similar to chromosome 10 open reading frame 6 (predicted)                                                                                                                  | RGD1560300_predicted     | 1.01±0.19  |
| similar to chromosome 14 open reading frame 130                                                                                                                            | RGD1359144               | 2.75±0.54  |
| similar to chromosome 14 open reading frame 138 (predicted)                                                                                                                | RGD1306228_predicted     | 1.1±0.07   |
| similar to chromosome 14 open reading frame 21 (predicted)                                                                                                                 | RGD1308396_predicted     | 0.33±0.07  |
| similar to chromosome 14 open reading frame 35 (predicted)                                                                                                                 | RGD1559923_predicted     | 1.96±0.15  |
| similar to chromosome 14 open reading frame 94                                                                                                                             | RGD1305288               | 0.66±0.3   |
| similar to chromosome 16 open reading frame 28 (predicted)                                                                                                                 | RGD1565247_predicted     | 3.81±0.02  |
| similar to chromosome 16 open reading frame 33; minus -99 protein (predicted)                                                                                              | RGD1310922_predicted     | 0.61±0.09  |
| similar to chromosome 16 open reading frame 5                                                                                                                              | RGD1310686               | 1.98±0.24  |
| similar to chromosome 16 open reading frame 7 (predicted)                                                                                                                  | RGD1565149_predicted     | 1.54±0.3   |
| similar to chromosome 2 open reading frame 3; transcription factor 9 (binds GC-rich sequences) (predicted)                                                                 | RGD1304792_predicted     | 0.31±0.1   |
| similar to chromosome 20 open reading frame 116 (predicted)                                                                                                                | RGD1309979_predicted     | 4.44±0.68  |
| similar to chromosome 20 open reading frame 30; HSPC274 protein                                                                                                            | RGD1307399               | 5.17±0.58  |
| Similar to chromosome 20 open reading frame 6                                                                                                                              | RGD1306067               | 1.9±0.11   |
| similar to chromosome 3 open reading frame 10                                                                                                                              | LOC679934                | 4.44±1.36  |
| similar to chromosome 6 open reading frame 106 isoform a                                                                                                                   | LOC294154                | 7.41±1.65  |
| similar to chromosome 7 open reading frame 11                                                                                                                              | LOC678905                | 0.94±0.14  |
| similar to chromosome 7 open reading frame 11                                                                                                                              | LOC678905 /// LOC684996  | 0.53±0.26  |
| Similar to chromosome 7 open reading frame 23 (predicted)                                                                                                                  | RGD1562351_predicted     | 1.07±0.26  |
| similar to chromosome 7 open reading frame 30 (predicted)                                                                                                                  | RGD1306936_predicted     | 3.75±0.54  |
| Similar to chromosome 9 open reading frame 5 (predicted)                                                                                                                   | RGD1308958_predicted     | 0.57±0.13  |
| similar to cleavage stimulation factor, 3 pre-RNA subunit 2                                                                                                                | LOC683927                | 0.33±0.09  |
| similar to c-myc promoter binding protein (predicted)                                                                                                                      | RGD1562639_predicted     | 0.25±0.13  |
| similar to Coatomer gamma-2 subunit (Gamma-2 coat protein) (Gamma-2 COP) (predicted)                                                                                       | RGD1566215_predicted     | 2.96±0.13  |
| Similar to coiled-coil domain containing 6                                                                                                                                 | LOC691155                | 32.21±3.02 |
| similar to coiled-coil domain containing 9                                                                                                                                 | LOC684934                | 0.83±0.22  |
| similar to coiled-coil-helix-coiled-coil-helix domain containing 7                                                                                                         | LOC684258                | 2.34±0.12  |
| Similar to Complement C1q-like protein 3 precursor (Gliacolin)                                                                                                             | LOC680404                | 1.62±0.32  |
| similar to component of oligomeric golgi complex 2                                                                                                                         | LOC678914                | 2.48±0.26  |
| similar to component of oligomeric golgi complex 2 /// component of oligomeric golgi complex 2                                                                             | Cog2 /// LOC678914       | 0.39±0.06  |
| similar to component of oligomeric golgi complex 5 isoform 1 (predicted)                                                                                                   | RGD1563296_predicted     | 0.63±0.11  |
| similar to constitutive photomorphogenic protein 1                                                                                                                         | RGD1304773               | 3.86±0.29  |
| similar to COX10 homolog, cytochrome c oxidase assembly protein, heme A: farnesyltransferase                                                                               | LOC687381 /// LOC691853  | 1.79±0.11  |
| similar to CPSF4 protein                                                                                                                                                   | MGC108785                | 2.8±0.53   |
| similar to cullin 4A (predicted)                                                                                                                                           | RGD1563853_predicted     | 2.02±0.19  |
| similar to cullin 7                                                                                                                                                        | LOC680835                | 0.23±0.1   |
| similar to Cysteine protease ATG4A (Autophagy-related protein 4 homolog A) (Autophagin-2) (Autophagy-related cysteine endopeptidase 2) (AUT-like 2 cysteine endopeptidase) | LOC678769                | 1.09±0.17  |
| similar to cystin 1                                                                                                                                                        | LOC690489                | 5.17±0.31  |
| similar to cytokine receptor related protein 4                                                                                                                             | Cytor4                   | 0.99±0.15  |
| similar to D1Ert0622e protein (predicted)                                                                                                                                  | RGD1562136_predicted     | 3.25±0.17  |
| similar to D330021B20 protein                                                                                                                                              | RGD1308143               | 2.05±0.55  |
| similar to D8Ert0354e protein (predicted)                                                                                                                                  | RGD1560755_predicted     | 4.07±0.72  |
| similar to dachshund b                                                                                                                                                     | LOC686314                | 1.21±0.18  |
| similar to Dachshund homolog 1 (Dach1)                                                                                                                                     | LOC306096                | 3.68±0.59  |
| similar to DEAD (Asp-Glu-Ala-Asp) box polypeptide 48                                                                                                                       | rCG_33565                | 6.58±0.38  |
| similar to death effector domain-containing DNA binding protein 2                                                                                                          | LOC687118                | 0.27±0.05  |
| similar to Dedicator of cytokinesis protein 1 (180 kDa protein downstream of CRK) (DOCK180)                                                                                | LOC679295                | 2.23±0.27  |
| similar to defective SPERMATOGENESIS family member (spe-39)                                                                                                                | LOC681989                | 1.82±0.13  |
| similar to Dendritic cell protein GA17 (predicted)                                                                                                                         | RGD1565840_predicted     | 13.47±1.97 |
| similar to density-regulated protein                                                                                                                                       | LOC689601                | 1.32±0.26  |
| similar to DEP domain containing 6 (predicted)                                                                                                                             | RGD1561030_predicted     | 0.71±0.13  |
| similar to Der1-like domain family, member 2                                                                                                                               | LOC687738                | 3.46±0.49  |
| similar to diacylglycerol kinase, delta 130kDa isoform 1 (predicted)                                                                                                       | RGD1563309_predicted     | 0.46±0.16  |
| similar to differentially expressed in B16F10 1                                                                                                                            | LOC687029                | 5.72±0.4   |
| Similar to dimerization cofactor of hepatocyte nuclear factor 1 (HNF1) from muscle                                                                                         | LOC685729                | 8.6±2.43   |
| similar to DIP13 alpha (predicted)                                                                                                                                         | RGD1309388_predicted     | 1.02±0.09  |
| similar to Disco-interacting protein 2 homolog /// DIP2 disco-interacting protein 2 homolog A (Drosophila)                                                                 | Dip2a /// LOC687682      | 0.43±0.12  |
| similar to divalent cation tolerant protein CUTA (predicted)                                                                                                               | RGD1564854_predicted     | 0.68±0.16  |
| similar to dJ202D23.2 (novel protein similar to C21ORF5 (KIAA0933)) (predicted)                                                                                            | RGD1305534_predicted     | 0.9±0.13   |
| Similar to dJ55C23.6 gene product (predicted)                                                                                                                              | RGD1306962_predicted     | 1.9±0.51   |
| similar to dJ842G6.1.1 (novel protein) (predicted)                                                                                                                         | RGD1309829_predicted     | 1.18±0.12  |
| similar to dJ881L22.2 (novel protein) (predicted)                                                                                                                          | RGD1307696_predicted     | 1.92±0.27  |
| Similar to DKFZP434B168 protein (predicted)                                                                                                                                | RGD1308014_predicted     | 0.56±0.24  |
| similar to DKFZP547E1010 protein                                                                                                                                           | LOC361990                | 2.49±0.07  |

|                                                                                                                                                    |                          |            |
|----------------------------------------------------------------------------------------------------------------------------------------------------|--------------------------|------------|
| similar to DKFZP547E1010 protein /// similar to Protein C1orf77 homolog                                                                            | LOC361990 /// LOC500378  | 0.75±0.01  |
| Similar to DNA (cytosine-5)-methyltransferase 3A (Dnmt3a) (DNA methyltransferase MmullIA) (DNA MTase MmullIA) (M.MmullIA) (predicted)              | RGD1305891_predicted     | 0.62±0.23  |
| similar to DNA segment on chromosome X and Y (unique) 155 expressed sequence isoform 1                                                             | LOC288526                | 0.35±0.1   |
| similar to DNA segment, Chr 1, Brigham & Womens Genetics 0212 expressed (predicted)                                                                | RGD1560909_predicted     | 1.33±0.05  |
| Similar to DNA segment, Chr 10, University of California at Los Angeles 1 (predicted)                                                              | RGD1560401_predicted     | 5.33±0.54  |
| similar to DNA segment, Chr 10, Wayne State University 102, expressed (predicted)                                                                  | RGD1563365_predicted     | 0.76±0.17  |
| similar to DNA segment, Chr 11, Wayne State University 99, expressed (predicted) /// hypothetical protein LOC619573                                | LOC619573 ///            | 0.84±0.34  |
| similar to DNA segment, Chr 14, ERATO Doi 436, expressed (predicted)                                                                               | RGD1309706_predicted     | 0.35±0.05  |
| similar to DNA segment, Chr 14, ERATO Doi 449, expressed                                                                                           | RGD1304610_predicted     | 0.39±0.42  |
| similar to DNA segment, Chr 18, Wayne State University 98, expressed (predicted)                                                                   | RGD1560212_predicted     | 4.63±0.79  |
| similar to DNA segment, Chr 19, ERATO Doi 386, expressed (predicted)                                                                               | RGD1307934_predicted     | 0.35±0.05  |
| similar to DNA segment, Chr 4, Brigham & Womens Genetics 0951 expressed                                                                            | RGD1308059               | 0.58±0.21  |
| similar to DNA segment, Chr 4, ERATO Doi 22, expressed (predicted)                                                                                 | RGD1560286_predicted     | 1.57±0.33  |
| similar to DNA segment, Chr 5, ERATO Doi 135, expressed                                                                                            | LOC679383                | 3.94±0.14  |
| similar to DNA segment, Chr 6, Wayne State University 163, expressed (predicted)                                                                   | RGD1311164_predicted     | 2.22±0.12  |
| similar to DnaJ (Hsp40) homolog, subfamily A, member 4                                                                                             | LOC498996                | 3.85±0.88  |
| similar to DnaJ (Hsp40) homolog, subfamily B, member 10 isoform 2                                                                                  | LOC689593                | 1.82±0.31  |
| similar to DnaJ homolog subfamily B member 6 (Heat shock protein J2) (HSJ-2) (MRJ) (mDj4)                                                          | LOC690183                | 5.04±0.44  |
| similar to DnaJ homolog subfamily B member 6 (Heat shock protein J2) (predicted)                                                                   | Dnajb6 /// LOC686213 /// | 1.59±0.12  |
|                                                                                                                                                    | LOC690183 ///            |            |
| similar to DOC-1 related protein /// CDK2-associated protein 2                                                                                     | RGD1565996_predicted     | 4.27±0.65  |
| similar to dolichyl-phosphate mannosyltransferase polypeptide 3 (Dolichol-phosphate mannose synthase subunit 3) (predicted)                        | Cdk2ap2 /// LOC683786    | 4.85±0.48  |
|                                                                                                                                                    | rCG_63436 ///            |            |
|                                                                                                                                                    | RGD1561807_predicted     |            |
| similar to downregulated in renal cell carcinoma                                                                                                   | RGD1306327               | 0.68±0.19  |
| similar to e(y)2 protein                                                                                                                           | LOC682575                | 11.64±1.76 |
| similar to early estrogen-induced gene 1 protein                                                                                                   | LOC687750                | 1.88±0.24  |
| similar to ecotropic viral integration site 5-like (predicted)                                                                                     | RGD1561962_predicted     | 1.12±0.17  |
| similar to Elongation factor Ts, mitochondrial precursor (EF-Ts) (EF-TsMt) (2A3-2)                                                                 | LOC679068                | 3.57±0.16  |
| similar to Elongation of very long chain fatty acids protein 1                                                                                     | LOC679532                | 10.75±1.47 |
| similar to elongation protein 4 homolog                                                                                                            | LOC687694                | 0.63±0.11  |
| similar to enoyl Coenzyme A hydratase domain containing 3                                                                                          | LOC684538                | 1.67±0.94  |
| similar to ENSANGP00000021391 (predicted)                                                                                                          | RGD1309779_predicted     | 10.35±0.3  |
| similar to ErbB2 interacting protein isoform 2 (predicted)                                                                                         | RGD1562952_predicted     | 6.73±0.73  |
| similar to erythroid differentiation-related factor 1 (predicted)                                                                                  | RGD1306820_predicted     | 0.71±0.13  |
| similar to ES cell-expressed Ras                                                                                                                   | LOC679682                | 3.35±0.91  |
| similar to Eukaryotic translation initiation factor 3 subunit 2 (eIF-3 beta) (eIF3 p36) (eIF3i) (TGF-beta receptor-interacting protein 1) (TRIP-1) | LOC682390                | 5.65±0.33  |
| similar to Exocyst complex component Sec15B (predicted)                                                                                            | RGD1560638_predicted     | 0.68±0.1   |
| similar to exosome component 1                                                                                                                     | LOC679140                | 0.93±0.12  |
| similar to exosome component 10                                                                                                                    | LOC313707                | 0.8±0.1    |
| similar to expressed sequence AA960436                                                                                                             | RGD1305215               | 0.23±0.03  |
| Similar to expressed sequence AI449175                                                                                                             | MGC72612                 | 0.22±0.09  |
| similar to expressed sequence AI597479                                                                                                             | RGD1310553               | 0.56±0.12  |
| similar to expressed sequence AW209491                                                                                                             | RGD1308147               | 2.07±0.38  |
| similar to expressed sequence AW212394 (predicted)                                                                                                 | RGD1562317_predicted     | 1.42±0.15  |
| similar to expressed sequence AW413431 (predicted)                                                                                                 | RGD1559841_predicted     | 1.72±0.27  |
| similar to expressed sequence AW556797 (predicted)                                                                                                 | RGD1305138_predicted     | 1.09±0.16  |
| similar to F28C1.3a                                                                                                                                | LOC308398                | 0.43±0.29  |
| similar to F33H2.2                                                                                                                                 | LOC689997                | 5.23±0.76  |
| similar to F54C1.5a                                                                                                                                | LOC499814                | 0.74±0.14  |
| similar to F57G4.9                                                                                                                                 | LOC690164                | 0.32±0.14  |
| similar to Fam13a1 protein                                                                                                                         | RGD1309807               | 0.91±0.2   |
| similar to family 53, member C protein                                                                                                             | LOC685405                | 0.9±0.1    |
| similar to family with sequence similarity 11, member A (predicted)                                                                                | RGD1563037_predicted     | 2.98±0.32  |
| similar to F-box only protein 31 (predicted)                                                                                                       | RGD1561069_predicted     | 1.77±0.12  |
| similar to F-box only protein 6 (F-box/G-domain protein 2) (predicted)                                                                             | RGD1305932_predicted     | 0.33±0.18  |
| similar to F-box protein FBL2                                                                                                                      | RGD1308119               | 0.43±0.19  |
| similar to Fbxw17 protein (predicted)                                                                                                              | RGD1566133_predicted     | 0.89±0.04  |
| similar to FKSG24 (predicted)                                                                                                                      | RGD1308064_predicted     | 4.6±0.71   |
| Similar to FLJ20298 protein isoform a (predicted)                                                                                                  | RGD1563084_predicted     | 4.3±0.35   |
| similar to FLJ42986 protein (predicted)                                                                                                            | RGD1560724_predicted     | 0.98±0.19  |
| similar to FUN14 domain containing 2 (predicted)                                                                                                   | RGD1560916_predicted     | 4.24±0.62  |
| Similar to G protein-coupled receptor 146 (predicted)                                                                                              | RGD1560731_predicted     | 0.58±0.12  |
| similar to gamma-aminobutyric acid (GABA(A)) receptor-associated protein-like 1                                                                    | MGC125167                | 9.36±0.81  |
| similar to GC-rich sequence DNA-binding factor homolog                                                                                             | LOC681004                | 0.86±0.25  |
| similar to gem (nuclear organelle) associated protein 5                                                                                            | LOC686616                | 0.66±0.08  |
| similar to gem (nuclear organelle) associated protein 7                                                                                            | LOC499391                | 0.24±0.13  |
| similar to gene trap ROSA b-geo 22                                                                                                                 | LOC687166 /// LOC691093  | 0.46±0.39  |
| similar to germinal histone H4 gene                                                                                                                | LOC684887                | 0.29±0.04  |
| similar to GI:13385412-like protein splice form I                                                                                                  | RGD735065                | 8.29±0.56  |
| similar to GLI-Kruppel family member GLI4                                                                                                          | LOC500893                | 0.55±0.17  |
| similar to Glucocorticoid receptor DNA-binding factor 1                                                                                            | LOC686359                | 2.57±0.1   |
| similar to Glucosylceramidase precursor (Beta-glucocerebrosidase) (Acid beta-glucosidase) (D-glucosyl-N-acylsphingosine glucosylase)               | LOC684536                | 3.53±0.38  |
| similar to glutathione transferase GSTM7-7                                                                                                         | MGC108896                | 1.96±0.26  |
| similar to glycogen synthase 1, muscle                                                                                                             | LOC687978 /// LOC690987  | 0.31±0.13  |
| similar to Golgi phosphoprotein 2 (Golgi membrane protein GP73)                                                                                    | LOC680692 /// LOC682869  | 2.21±0.3   |
| similar to GS2 gene (predicted)                                                                                                                    | RGD1562200_predicted     | 0.38±0.05  |
| similar to GTPase activating RANGAP domain-like 3 (predicted)                                                                                      | RGD1564019_predicted     | 3.16±0.64  |
| similar to Harmonin-interacting ankyrin repeat-containing protein (Harp)                                                                           | LOC687561                | 4.44±0.6   |

|                                                                                                                                                                            |                          |            |
|----------------------------------------------------------------------------------------------------------------------------------------------------------------------------|--------------------------|------------|
| similar to HCDI protein (predicted)                                                                                                                                        | RGD1309307_predicted     | 0.43±0.03  |
| similar to Hepatocellular carcinoma-associated antigen 58 homolog (predicted)                                                                                              | RGD1305020_predicted     | 0.75±0.12  |
| Similar to heterogeneous nuclear ribonucleoprotein G - human                                                                                                               | LOC302855                | 1.36±0.35  |
| similar to Histidine triad nucleotide-binding protein 1 (Adenosine 5-monophosphoramidase) (Protein kinase C inhibitor 1) (Protein kinase C-interacting protein 1) (PKCI-1) | LOC690660                | 33.61±1.56 |
| Similar to histocompatibility 28                                                                                                                                           | LOC310968                | 0.84±0.13  |
| similar to histone cell cycle regulation defective homolog A isoform 1                                                                                                     | LOC363849                | 0.55±0.1   |
| similar to Histone H1.2 (H1 VAR.1) (H1c)                                                                                                                                   | LOC684681                | 3.7±1.45   |
| similar to HIV-1 Rev binding protein                                                                                                                                       | LOC363266                | 1.46±0.39  |
| similar to HLA-B associated transcript-2 isoform a                                                                                                                         | LOC296637                | 1.09±0.45  |
| similar to HSPC043 protein (predicted)                                                                                                                                     | RGD1307983_predicted     | 0.56±0.04  |
| similar to HSPC288 (predicted)                                                                                                                                             | RGD1310769_predicted     | 1.16±0.13  |
| similar to HT014 (predicted)                                                                                                                                               | RGD1308048_predicted     | 2.6±0.17   |
| similar to HT021 (predicted)                                                                                                                                               | RGD1306063_predicted     | 1.58±0.04  |
| similar to HTGN29 protein; keratinocytes associated transmembrane protein 2                                                                                                | RGD1310352               | 8.92±1.16  |
| similar to hypothetical gene supported by AF226663 (predicted)                                                                                                             | RGD1565146_predicted     | 0.53±0.06  |
| similar to hypothetical gene supported by AK085276 (predicted)                                                                                                             | RGD1562252_predicted     | 0.73±0.1   |
| similar to hypothetical MGC48595 (predicted)                                                                                                                               | RGD1566220_predicted     | 0.47±0.13  |
| similar to hypothetical p38 protein (predicted)                                                                                                                            | RGD1311910_predicted     | 1.16±0.19  |
| similar to hypothetical protein                                                                                                                                            | RGD1306595               | 2.01±0.37  |
| similar to hypothetical protein                                                                                                                                            | RGD1310571               | 1.66±0.02  |
| similar to hypothetical protein                                                                                                                                            | RGD1307336               | 0.91±0.08  |
| similar to hypothetical protein                                                                                                                                            | RGD1311361               | 0.7±0.05   |
| similar to hypothetical protein                                                                                                                                            | RGD1310571               | 0.28±0.19  |
| similar to hypothetical protein                                                                                                                                            | LOC360479                | 0.26±0.07  |
| similar to hypothetical protein (predicted)                                                                                                                                | RGD1305045_predicted     | 12±1.13    |
| similar to hypothetical protein (predicted)                                                                                                                                | RGD1308489_predicted     | 2.96±0.43  |
| similar to hypothetical protein (predicted)                                                                                                                                | RGD1561605_predicted     | 2.46±0.13  |
| similar to hypothetical protein (predicted)                                                                                                                                | RGD1309765_predicted     | 1.56±0.38  |
| similar to hypothetical protein (predicted)                                                                                                                                | RGD1565432_predicted     | 1.21±0.18  |
| similar to hypothetical protein (predicted)                                                                                                                                | RGD1308489_predicted     | 1.08±0.36  |
| similar to hypothetical protein (predicted)                                                                                                                                | RGD1310440_predicted     | 0.93±0.2   |
| similar to hypothetical protein (predicted)                                                                                                                                | RGD1306576_predicted     | 0.74±0.27  |
| similar to hypothetical protein (predicted)                                                                                                                                | RGD1560620_predicted     | 0.48±0.09  |
| similar to hypothetical protein (predicted)                                                                                                                                | RGD1305269_predicted     | 0.4±0.09   |
| similar to hypothetical protein 6720484B16 (predicted)                                                                                                                     | RGD1304881_predicted     | 0.57±0.16  |
| Similar to hypothetical protein A430031N04 (predicted)                                                                                                                     | RGD1559643_predicted     | 0.23±0.08  |
| similar to Hypothetical protein A430033K04 (predicted)                                                                                                                     | RGD1566386_predicted     | 0.23±0.07  |
| similar to hypothetical protein BC011833 (predicted)                                                                                                                       | RGD1309188_predicted     | 4.25±0.38  |
| similar to Hypothetical protein BC014729                                                                                                                                   | MGC105560                | 3.62±0.2   |
| similar to hypothetical protein BC015148 (predicted)                                                                                                                       | RGD1309095_predicted     | 0.44±0.12  |
| similar to Hypothetical protein C6orf60 (predicted) /// similar to minichromosome maintenance protein 8 isoform 1 (predicted)                                              | RGD1311294_predicted /// | 0.45±0.07  |
|                                                                                                                                                                            | RGD1560557_predicted     |            |
| similar to Hypothetical protein CGI-99                                                                                                                                     | RGD1304704               | 13.67±0.81 |
| similar to hypothetical protein CL25084 (predicted)                                                                                                                        | RGD1306508_predicted     | 7.24±0.68  |
| similar to hypothetical protein D030056L22                                                                                                                                 | LOC499331                | 1.15±0.07  |
| Similar to hypothetical protein D15ErtD785e                                                                                                                                | MGC114417                | 0.65±0.13  |
| similar to hypothetical protein D2ErtD391e (predicted)                                                                                                                     | RGD1310685_predicted     | 1.57±0.23  |
| similar to hypothetical protein DKFZp313N0621 (predicted)                                                                                                                  | RGD1560717_predicted     | 6.58±0.19  |
| similar to hypothetical protein DKFZp434A1319 (predicted)                                                                                                                  | RGD1307357_predicted     | 0.81±0.15  |
| similar to hypothetical protein DKFZp434K1815                                                                                                                              | LOC304396                | 0.33±0.07  |
| similar to hypothetical protein DKFZp564D0478 (predicted)                                                                                                                  | RGD1304793_predicted     | 0.89±0.29  |
| similar to hypothetical protein ET (predicted)                                                                                                                             | RGD1307394_predicted     | 1.52±0.09  |
| Similar to hypothetical protein F730001J03 (predicted)                                                                                                                     | RGD1311757_predicted     | 0.83±0.02  |
| similar to hypothetical protein FLJ10154                                                                                                                                   | RGD1310061               | 3.71±0.96  |
| similar to hypothetical protein FLJ10342 (predicted)                                                                                                                       | RGD1307791_predicted     | 0.75±0.1   |
| similar to hypothetical protein FLJ10901 (predicted)                                                                                                                       | RGD1311892_predicted     | 0.54±0.05  |
| similar to hypothetical protein FLJ10925                                                                                                                                   | RGD1305455               | 0.71±0.21  |
| similar to hypothetical protein FLJ10986                                                                                                                                   | LOC298250                | 12.64±1.34 |
| similar to hypothetical protein FLJ11193 (predicted)                                                                                                                       | RGD1306502_predicted     | 1.21±0.28  |
| similar to hypothetical protein FLJ11218                                                                                                                                   | RGD1309804               | 2.11±0.25  |
| Similar to hypothetical protein FLJ11305 (predicted)                                                                                                                       | RGD1307041_predicted     | 0.94±0.07  |
| similar to hypothetical protein FLJ12118 (predicted)                                                                                                                       | RGD1311612_predicted     | 0.57±0.06  |
| similar to hypothetical protein FLJ12242 (predicted)                                                                                                                       | RGD1311154_predicted     | 2.59±0.54  |
| similar to hypothetical protein FLJ12661 (predicted)                                                                                                                       | RGD1309403_predicted     | 0.35±0.1   |
| Similar to hypothetical protein FLJ12787                                                                                                                                   | RGD1310992               | 1.41±0.58  |
| similar to hypothetical protein FLJ13045 (predicted)                                                                                                                       | RGD1307615_predicted     | 0.63±0.26  |
| similar to hypothetical protein FLJ13089                                                                                                                                   | RGD1305685               | 0.45±0.03  |
| similar to hypothetical protein FLJ13149 (predicted)                                                                                                                       | RGD1563839_predicted     | 1.53±0.36  |
| similar to hypothetical protein FLJ13188 (predicted)                                                                                                                       | RGD1305500_predicted     | 0.28±0.07  |
| similar to hypothetical protein FLJ13231 (predicted) /// hypothetical protein LOC679830                                                                                    | LOC679830 ///            | 0.3±0.15   |
|                                                                                                                                                                            | RGD1310081_predicted     |            |
| similar to hypothetical protein FLJ14146                                                                                                                                   | RGD1310587               | 9.51±1.9   |
| similar to hypothetical protein FLJ14675                                                                                                                                   | RGD1309592               | 0.36±0.1   |
| similar to hypothetical protein FLJ20010 (predicted)                                                                                                                       | RGD1563941_predicted     | 3.51±1.25  |
| Similar to hypothetical protein FLJ20154                                                                                                                                   | RGD1305793               | 2.68±0.44  |
| similar to hypothetical protein FLJ20254                                                                                                                                   | RGD1311324               | 2.15±0.31  |
| similar to hypothetical protein FLJ20276 (predicted)                                                                                                                       | RGD1308101               | 0.21±0.03  |
| similar to hypothetical protein FLJ20436                                                                                                                                   | RGD1303127               | 1.15±0.22  |
| similar to hypothetical protein FLJ20487                                                                                                                                   | RGD1309216               | 5.01±0.85  |
| similar to hypothetical protein FLJ20507 (predicted)                                                                                                                       | RGD1309744_predicted     | 3.89±0.23  |
| Similar to hypothetical protein FLJ20627 (predicted)                                                                                                                       | RGD1309546_predicted     | 3.67±0.44  |
| similar to hypothetical protein FLJ20729 (predicted)                                                                                                                       | RGD1308723_predicted     | 0.32±0.08  |
| similar to hypothetical protein FLJ21156 (predicted)                                                                                                                       | RGD1309823_predicted     | 0.79±0.17  |
| similar to hypothetical protein FLJ21820                                                                                                                                   | RGD1311648               | 2.54±0.41  |
| similar to hypothetical protein FLJ21827                                                                                                                                   | RGD1307682               | 1.45±0.34  |



|                                                                                                                                     |                      |            |
|-------------------------------------------------------------------------------------------------------------------------------------|----------------------|------------|
| similar to hypothetical protein FLJ22490 (predicted)                                                                                | RGD1307055_predicted | 1.09±0.22  |
| similar to hypothetical protein FLJ22965 (predicted)                                                                                | RGD1564541_predicted | 1.61±0.18  |
| similar to hypothetical protein FLJ23263                                                                                            | RGD1310414           | 0.36±0.08  |
| Similar to hypothetical protein FLJ23451 (predicted)                                                                                | RGD1310453_predicted | 0.32±0.02  |
| similar to hypothetical protein FLJ30596 (predicted)                                                                                | RGD1306809_predicted | 2.09±0.28  |
| similar to hypothetical protein FLJ31364 (predicted)                                                                                | RGD1304924_predicted | 0.29±0.1   |
| similar to hypothetical protein FLJ31528                                                                                            | RGD1307410           | 0.74±0.17  |
| similar to hypothetical protein FLJ31606 (predicted)                                                                                | RGD1561507_predicted | 0.22±0.11  |
| similar to hypothetical protein FLJ32825 (predicted)                                                                                | RGD1564257_predicted | 5.57±0.64  |
| Similar to hypothetical protein FLJ32884 (predicted)                                                                                | RGD1309453_predicted | 1.1±0.15   |
| similar to hypothetical protein FLJ33868 (predicted)                                                                                | RGD1305797_predicted | 1.42±0.16  |
| Similar to hypothetical protein FLJ33977 (predicted)                                                                                | RGD1306423_predicted | 0.74±0.06  |
| similar to hypothetical protein FLJ37953 (predicted)                                                                                | RGD1311269_predicted | 0.72±0.27  |
| similar to hypothetical protein FLJ38348 (predicted)                                                                                | RGD1311424_predicted | 0.79±0.27  |
| similar to Hypothetical protein KIAA0152                                                                                            | RGD1307736           | 2.86±0.17  |
| similar to Hypothetical protein KIAA0373 (predicted)                                                                                | RGD1311640_predicted | 0.28±0.03  |
| similar to Hypothetical protein KIAA0539 (predicted)                                                                                | RGD1304621_predicted | 0.43±0.05  |
| similar to hypothetical protein LOC168850 (predicted)                                                                               | RGD1560157_predicted | 0.64±0.12  |
| similar to hypothetical protein LOC284018 isoform b (predicted)                                                                     | RGD1565033_predicted | 1.94±0.26  |
| similar to Hypothetical protein MGC11690                                                                                            | RGD1305178           | 1.67±0.38  |
| similar to hypothetical protein MGC14327 (predicted)                                                                                | RGD1306304_predicted | 2.6±0.16   |
| similar to hypothetical protein MGC17943 (predicted)                                                                                | RGD1563325_predicted | 2.21±0.11  |
| similar to Hypothetical protein MGC18716                                                                                            | RGD1307935           | 1.01±0.18  |
| Similar to hypothetical protein MGC20700 (predicted)                                                                                | RGD1307722_predicted | 0.57±0.12  |
| similar to hypothetical protein MGC23280 (predicted)                                                                                | RGD1305508_predicted | 0.58±0.16  |
| similar to hypothetical protein MGC2494                                                                                             | RGD1306126           | 2.31±0.58  |
| similar to hypothetical protein MGC25461 (predicted)                                                                                | RGD1306717_predicted | 0.26±0.06  |
| similar to Hypothetical protein MGC25529 (predicted)                                                                                | RGD1306746_predicted | 1.32±0.02  |
| Similar to hypothetical protein MGC29390 (predicted)                                                                                | RGD1310490_predicted | 0.79±0.02  |
| similar to hypothetical protein MGC29875; novel putative protein similar to YIL091C yeast hypothetical 84 kD protein from SGA1-KTR7 | LOC305076            | 0.66±0.12  |
| similar to hypothetical protein MGC30618                                                                                            | RGD1305572           | 0.83±0.01  |
| similar to hypothetical protein MGC3207                                                                                             | RGD1307789           | 1.49±0.06  |
| similar to hypothetical protein MGC34760                                                                                            | RGD1359349           | 2.95±1.68  |
| Similar to hypothetical protein MGC36325 (predicted)                                                                                | RGD1307374_predicted | 0.41±0.01  |
| similar to hypothetical protein MGC36831 (predicted)                                                                                | RGD1306215_predicted | 1.1±0.31   |
| similar to hypothetical protein MGC37079 (predicted)                                                                                | RGD1310484_predicted | 1.39±0.08  |
| similar to Hypothetical protein MGC38513                                                                                            | RGD1304580           | 0.67±0.03  |
| similar to hypothetical protein MGC38960 (predicted)                                                                                | RGD1310552_predicted | 1.56±0.15  |
| similar to hypothetical protein MGC40841; similar to hypothetical protein MGC4707                                                   | RGD1309540           | 0.97±0.21  |
| similar to hypothetical protein MGC45873 (predicted)                                                                                | RGD1310271_predicted | 0.24±0.12  |
| similar to hypothetical protein MGC47256 (predicted)                                                                                | RGD1308694_predicted | 5.74±0.67  |
| similar to hypothetical protein MGC52110 (predicted)                                                                                | RGD1565095_predicted | 18.56±0.39 |
| similar to hypothetical protein MGC6696                                                                                             | RGD1309471           | 4.25±0.6   |
| similar to hypothetical protein MGC7537                                                                                             | RGD1359380           | 2.45±0.53  |
| similar to hypothetical protein MGC9912 (predicted)                                                                                 | RGD1309138_predicted | 1.03±0.05  |
| similar to hypothetical protein PRO0971                                                                                             | RGD1311435           | 1.63±0.19  |
| similar to hypothetical protein supported by AL449243 (predicted) /// similar to CG17680-PA                                         | LOC687237 ///        | 29.26±1.47 |
| similar to Hypothetical UPF0184 protein C9orf16 homolog (predicted)                                                                 | RGD1311310_predicted |            |
| similar to Hypothetical UPF0327 protein (predicted)                                                                                 | RGD1561113_predicted | 1.35±0.37  |
| similar to Integrin alpha-IIb precursor (Platelet membrane glycoprotein IIb) (GPalpha IIb) (GPIIb) (CD41 antigen)                   | RGD1560187_predicted | 21.98±1.24 |
| similar to Interferon-alpha                                                                                                         | LOC685269            | 0.54±0.11  |
| similar to IQ motif and Sec7 domain 1                                                                                               | LOC686326            | 0.26±0.26  |
| similar to IQ motif and Sec7 domain 2                                                                                               | LOC686590            | 5.73±0.99  |
| Similar to IQ motif and WD repeats 1 (predicted)                                                                                    | LOC685244            | 0.58±0.06  |
| similar to isochorismatase domain containing 2                                                                                      | RGD1561961_predicted | 1.24±0.31  |
| similar to jumonji domain containing 1B                                                                                             | LOC684270            | 4.84±0.79  |
| similar to jumonji domain containing 2B                                                                                             | LOC682469            | 1.86±0.26  |
| similar to jumonji protein                                                                                                          | LOC301128            | 0.22±0.1   |
| similar to Jumonji/ARID domain-containing protein 1C (SmcX protein) (predicted)                                                     | LOC681740            | 2.05±0.45  |
| similar to K11B4.2                                                                                                                  | RGD1560601_predicted | 1.43±0.26  |
| similar to K11B4.2                                                                                                                  | LOC688966            | 2.59±0.35  |
|                                                                                                                                     | LOC684626 ///        | 0.65±0.12  |
| similar to KB07 protein (predicted)                                                                                                 | RGD1561940_predicted | 5.3±0.4    |
| similar to keratinocytes associated protein 3                                                                                       | LOC683980            | 0.36±0.14  |
| similar to KIAA0090 protein (predicted)                                                                                             | RGD1310427_predicted | 1.79±0.61  |
| similar to KIAA0157 gene product is novel. (predicted)                                                                              | RGD1308918_predicted | 1.13±0.3   |
| Similar to KIAA0240 (predicted)                                                                                                     | RGD1305680_predicted | 0.94±0.37  |
| similar to KIAA0335                                                                                                                 | RGD1305314           | 0.89±0.13  |
| similar to KIAA0368 (predicted)                                                                                                     | RGD1306148_predicted | 1.91±0.23  |
| similar to KIAA0372 gene product (predicted)                                                                                        | RGD1306062_predicted | 0.89±0.23  |
| similar to KIAA0406-like protein (predicted)                                                                                        | RGD1562582_predicted | 3.98±0.39  |
| similar to KIAA0423 (predicted)                                                                                                     | RGD1310474_predicted | 1.8±0.18   |
| similar to KIAA0456 protein (predicted)                                                                                             | RGD1566016_predicted | 0.47±0.19  |
| similar to KIAA0467 protein (predicted)                                                                                             | RGD1308616_predicted | 0.69±0.19  |
| similar to KIAA0528 protein (predicted)                                                                                             | RGD1304592_predicted | 1.2±0.09   |
| Similar to KIAA0564 protein (predicted)                                                                                             | RGD1308772_predicted | 5.22±1.75  |
| Similar to KIAA0597 protein (predicted)                                                                                             | RGD1565757_predicted | 20.83±1.47 |
| similar to KIAA0614 protein (predicted)                                                                                             | RGD1309762_predicted | 0.2±0.02   |
| Similar to KIAA0672 gene product                                                                                                    | RGD1305664           | 0.59±0.12  |
| similar to KIAA0833 protein /// similar to calmodulin-binding transcription activator 1                                             | LOC362665 ///        | 0.83±0.51  |
| similar to KIAA0853 protein (predicted)                                                                                             | RGD1563689_predicted | 2.49±0.33  |
| Similar to KIAA0869 protein (predicted)                                                                                             | RGD1308329_predicted | 0.29±0.12  |
| similar to KIAA0913 protein (predicted)                                                                                             | RGD1309414_predicted | 3.53±0.6   |
| similar to KIAA0947 protein (predicted)                                                                                             | RGD1309747_predicted | 0.46±0.24  |

|                                                                                                                                                                                                                                                             |                         |            |
|-------------------------------------------------------------------------------------------------------------------------------------------------------------------------------------------------------------------------------------------------------------|-------------------------|------------|
| similar to KIAA0965 protein (predicted)                                                                                                                                                                                                                     | RGD1564793_predicted    | 0.84±0.18  |
| similar to KIAA0999 protein                                                                                                                                                                                                                                 | LOC684112               | 3.28±0.71  |
| similar to KIAA1007 protein; adrenal gland protein AD-005                                                                                                                                                                                                   | RGD1308009              | 5.91±0.17  |
| similar to KIAA1009 protein                                                                                                                                                                                                                                 | RGD1307365              | 0.24±0.01  |
| similar to KIAA1078 protein (predicted)                                                                                                                                                                                                                     | RGD1310950_predicted    | 0.59±0.14  |
| Similar to KIAA1161 protein (predicted)                                                                                                                                                                                                                     | RGD1309821_predicted    | 0.3±0.06   |
| similar to KIAA1267 protein (predicted)                                                                                                                                                                                                                     | RGD1311429_predicted    | 1.64±0.25  |
| Similar to KIAA1280 protein (predicted)                                                                                                                                                                                                                     | RGD1560666_predicted    | 1.04±0.03  |
| similar to KIAA1411 protein (predicted)                                                                                                                                                                                                                     | RGD1304927_predicted    | 2.04±0.12  |
| similar to KIAA1582 protein (predicted)                                                                                                                                                                                                                     | RGD1310027_predicted    | 0.45±0.2   |
| similar to KIAA1627 protein (predicted)                                                                                                                                                                                                                     | RGD1304822_predicted    | 1.86±0.15  |
| similar to KIAA1636 protein (predicted)                                                                                                                                                                                                                     | RGD1309285_predicted    | 0.68±0.15  |
| similar to KIAA1712 protein                                                                                                                                                                                                                                 | RGD1308517              | 0.4±0.05   |
| similar to KIAA1841 protein (predicted)                                                                                                                                                                                                                     | RGD1305110_predicted    | 0.43±0.12  |
| similar to KIAA1919 protein (predicted)                                                                                                                                                                                                                     | RGD1310495_predicted    | 11.53±1.57 |
| similar to KIAA2026 protein                                                                                                                                                                                                                                 | RGD1311595              | 2.21±0.21  |
| similar to kynurenine formamidase                                                                                                                                                                                                                           | rCG_34031               | 5.45±1.03  |
| Similar to Lethal giant larvae homology 2 (predicted)                                                                                                                                                                                                       | RGD1560307_predicted    | 0.62±0.14  |
| similar to LEYDIG CELL TUMOR 10 KD PROTEIN                                                                                                                                                                                                                  | LOC288913               | 2.68±0.36  |
| similar to ligatin                                                                                                                                                                                                                                          | LOC498225               | 1.98±0.15  |
| similar to lin-9 homolog (C. elegans) /// lin-9 homolog (C. elegans)                                                                                                                                                                                        | Lin9 /// LOC360888      | 0.3±0.02   |
| similar to liver-specific bHLH-Zip transcription factor                                                                                                                                                                                                     | LOC686794               | 6.95±0.46  |
| Similar to Lmnb2 protein (predicted)                                                                                                                                                                                                                        | RGD1563803_predicted    | 0.21±0.08  |
| similar to LOC495800 protein                                                                                                                                                                                                                                | LOC499770               | 0.84±0.2   |
| similar to lymphocyte antigen 6 complex, locus E ligand                                                                                                                                                                                                     | LOC501282               | 3.32±0.27  |
| similar to lysophosphatidylglycerol acyltransferase 1                                                                                                                                                                                                       | LOC679692               | 6.61±0.36  |
| similar to M phase phosphoprotein 6                                                                                                                                                                                                                         | LOC686999               | 1.24±0.22  |
| similar to Maleylacetoacetate isomerase (MAAI) (Glutathione S-transferase zeta 1) (GSTZ1-1)                                                                                                                                                                 | LOC681913               | 6.96±0.69  |
| similar to mammalian retrotransposon derived 8b                                                                                                                                                                                                             | LOC678880               | 8.55±1.2   |
| similar to Map4k6-pending protein /// similar to misshapen-like kinase 1 isoform 1                                                                                                                                                                          | LOC303259 /// LOC687705 | 1.7±0.18   |
| similar to MASK-4E-BP3 protein                                                                                                                                                                                                                              | LOC682955               | 2.85±0.45  |
| similar to MASK-4E-BP3 protein                                                                                                                                                                                                                              | LOC679725 /// LOC682955 | 2.21±0.38  |
| similar to MASK-4E-BP3 protein                                                                                                                                                                                                                              | LOC679725               | 1.11±0.05  |
| similar to mbt domain containing 1                                                                                                                                                                                                                          | LOC688133               | 2.09±0.3   |
| similar to Mediator of RNA polymerase II transcription subunit 12 (Thyroid hormone receptor-associated protein complex 230 kDa component) (Trap230) (Activator-recruited cofactor 240 kDa component) (ARC240) (CAG repeat protein 45) (OPA-containing pr... | LOC679693               | 0.6±0.05   |
| similar to mediator of RNA polymerase II transcription, subunit 18 homolog                                                                                                                                                                                  | LOC682988               | 0.44±0.46  |
| similar to melanoma inhibitory activity 3                                                                                                                                                                                                                   | LOC683007               | 5.84±1.17  |
| similar to membrane-associated RING-CH protein IX                                                                                                                                                                                                           | LOC679272               | 0.97±0.32  |
| similar to Metaxin 1, isoform 2                                                                                                                                                                                                                             | LOC295241               | 2.14±0.5   |
| similar to methionine adenosyltransferase II, beta /// methionine adenosyltransferase II, beta                                                                                                                                                              | Mat2b /// MGC94725      | 17.22±0.5  |
| similar to Methionine-R-sulfoxide reductase (Selenoprotein X 1) (Selenoprotein R)                                                                                                                                                                           | MGC105753               | 35.33±3.33 |
| similar to microfibrillar-associated protein 1 (predicted) /// microfibrillar-associated protein 1A                                                                                                                                                         | Mfap1a ///              | 1.08±0.1   |
| similar to microfilament and actin filament cross-linker protein isoform b                                                                                                                                                                                  | RGD1564148_predicted    |            |
| similar to Microsomal signal peptidase 23 kDa subunit (SPase 22 kDa subunit) (SPC22/23)                                                                                                                                                                     | LOC362587               | 1.5±0.23   |
| similar to Microtubule-associated protein RP/EB family member 2 (APC-binding protein EB2) (End-binding protein 2) (EB2)                                                                                                                                     | MGC109340               | 0.81±0.07  |
| Similar to MIR-interacting saposin-like protein precursor (Transmembrane protein 4) (Putative secreted protein ZSIG9)                                                                                                                                       | LOC679221               | 0.24±0.2   |
| similar to mitochondria-associated granulocyte macrophage CSF signaling molecule (predicted)                                                                                                                                                                | LOC685001               | 0.31±0.09  |
|                                                                                                                                                                                                                                                             | Magmas ///              | 7.55±1.19  |
|                                                                                                                                                                                                                                                             | RGD1564452_predicted    |            |
| similar to Mitochondrial 28S ribosomal protein S28 (S28mt) (MRP-S28)                                                                                                                                                                                        | LOC679330               | 1.7±0.36   |
| similar to Mitochondrial 39S ribosomal protein L39 (L39mt) (MRP-L39)                                                                                                                                                                                        | LOC684304               | 2.42±0.07  |
| similar to Mitochondrial carrier triple repeat 1 (predicted)                                                                                                                                                                                                | LOC686727 ///           | 5.55±0.64  |
|                                                                                                                                                                                                                                                             | Mcart2_predicted ///    |            |
|                                                                                                                                                                                                                                                             | RGD1565119_predicted    |            |
| similar to mitochondrial hepatocellular carcinoma-downregulated carrier protein                                                                                                                                                                             | LOC684556               | 4.27±0.48  |
| similar to mitochondrial ribosomal protein L10                                                                                                                                                                                                              | LOC691075               | 2.4±0.18   |
| similar to mKIAA0133 protein (predicted)                                                                                                                                                                                                                    | RGD1307980_predicted    | 0.33±0.05  |
| similar to mKIAA0215 protein (predicted)                                                                                                                                                                                                                    | RGD1563945_predicted    | 0.85±0.16  |
| similar to mKIAA0256 protein (predicted)                                                                                                                                                                                                                    | RGD1559930_predicted    | 1.55±0.52  |
| similar to mKIAA0317 protein (predicted)                                                                                                                                                                                                                    | RGD1307597_predicted    | 1.43±0.36  |
| similar to mKIAA0664 protein (predicted)                                                                                                                                                                                                                    | RGD1307222_predicted    | 7.81±0.69  |
| similar to mKIAA0738 protein (predicted)                                                                                                                                                                                                                    | RGD1565474_predicted    | 0.91±0.22  |
| similar to mKIAA0978 protein (predicted)                                                                                                                                                                                                                    | RGD1561878_predicted    | 0.42±0.12  |
| similar to mKIAA1011 protein                                                                                                                                                                                                                                | LOC366669               | 5.97±0.8   |
| similar to mKIAA1111 protein (predicted)                                                                                                                                                                                                                    | RGD1561065_predicted    | 0.74±0.04  |
| Similar to mKIAA1208 protein (predicted)                                                                                                                                                                                                                    | RGD1564821_predicted    | 1.23±0.22  |
| similar to mKIAA1402 protein (predicted)                                                                                                                                                                                                                    | RGD1306404_predicted    | 0.56±0.09  |
| similar to mKIAA1429 protein (predicted)                                                                                                                                                                                                                    | RGD1559904_predicted    | 0.64±0.12  |
| similar to mKIAA1450 protein (predicted)                                                                                                                                                                                                                    | RGD1562174_predicted    | 2.16±0.41  |
| similar to mKIAA1604 protein (predicted)                                                                                                                                                                                                                    | RGD1565385_predicted    | 0.28±0.2   |
| similar to mKIAA1737 protein (predicted)                                                                                                                                                                                                                    | RGD1309492_predicted    | 3.62±0.42  |
| similar to mKIAA1797 protein (predicted)                                                                                                                                                                                                                    | RGD1311849_predicted    | 1.59±0.17  |
| similar to mKIAA1931 protein (predicted)                                                                                                                                                                                                                    | RGD1562335_predicted    | 0.53±0.15  |
| similar to Mkrn1 protein                                                                                                                                                                                                                                    | MGC94941                | 1.6±0.21   |
| similar to modulator of estrogen induced transcription                                                                                                                                                                                                      | RGD1307526              | 2.86±0.36  |
| similar to monogenic, audiogenic seizure susceptibility 1                                                                                                                                                                                                   | LOC685383               | 0.95±0.17  |
| similar to Mospd2 protein (predicted)                                                                                                                                                                                                                       | RGD1563952_predicted    | 4.05±0.26  |
| Similar to Msx2-interacting protein (SPEN homolog) (SMART/HDAC1-associated repressor protein)                                                                                                                                                               | LOC690911               | 0.69±0.15  |
| similar to multi sex combs CG12058-PA                                                                                                                                                                                                                       | LOC686883               | 1.79±0.57  |
| Similar to Murine homolog of human ftp-3                                                                                                                                                                                                                    | LOC308650               | 4.74±0.21  |
| similar to muscleblind-like 2 isoform 1                                                                                                                                                                                                                     | LOC680445               | 7.77±0.55  |
| Similar to Myc-associated zinc finger protein (MAZI) (Purine-binding transcription factor) (Pur-1)                                                                                                                                                          | LOC691842               | 0.78±0.1   |

|                                                                                                                                         |                                                       |            |
|-----------------------------------------------------------------------------------------------------------------------------------------|-------------------------------------------------------|------------|
| similar to Myeloid/lymphoid or mixed-lineage leukemia protein 3 homolog (Histone-lysine N-methyltransferase, H3 lysine-4 specific MLL3) | LOC502710                                             | 1.58±0.23  |
| similar to myocyte enhancer factor 2C                                                                                                   | LOC309957                                             | 1.22±0.31  |
| similar to myosin light chain 1 slow a                                                                                                  | LOC684533                                             | 0.3±0.19   |
| similar to myosin XVIIIa                                                                                                                | LOC360570                                             | 1.95±0.24  |
| similar to Myosin-15 (Myosin XV) (Unconventional myosin-15)                                                                             | LOC688266 /// LOC690323                               | 0.7±0.26   |
| similar to Myosin-15 (Myosin XV) (Unconventional myosin-15)                                                                             | LOC688264                                             | 0.67±0.22  |
| similar to MYST histone acetyltransferase monocytic leukemia 4 (predicted)                                                              | RGD1566399_predicted                                  | 0.31±0.2   |
| similar to NADH-ubiquinone oxidoreductase B9 subunit (Complex I-B9) (CI-B9)                                                             | LOC683547                                             | 21.9±3.05  |
| similar to NADH-ubiquinone oxidoreductase PDSW subunit (Complex I-PDSW) (CI-PDSW)                                                       | LOC681418 /// LOC681867                               | 11.41±1.63 |
| similar to Naglu (predicted)                                                                                                            | RGD1564228_predicted                                  | 2.14±0.57  |
| similar to Negative elongation factor D (NELF-D) (TH1-like protein)                                                                     | LOC679203                                             | 1.13±0.18  |
| Similar to nemo like kinase (predicted)                                                                                                 | RGD1561602_predicted                                  | 0.41±0.07  |
| similar to nemo like kinase (predicted) /// nemo like kinase                                                                            | Nik ///                                               | 1.3±0.23   |
| similar to NHP2-like protein 1 (High mobility group-like nuclear protein 2 homolog 1) ([U4/U6.U5] tri-snRNP 15.5 kDa protein) (OTK27)   | RGD1561440_predicted<br>MGC72932                      | 4.71±0.46  |
| similar to NICE-3                                                                                                                       | LOC361985                                             | 6.61±0.25  |
| similar to Nicotinamide riboside kinase 1                                                                                               | LOC499330                                             | 1.6±0.27   |
| similar to NMDA receptor regulated 1-like                                                                                               | LOC686240                                             | 0.26±0.03  |
| similar to NN3 (predicted)                                                                                                              | RGD1310358_predicted                                  | 1.31±0.08  |
| similar to novel protein (HT036) (predicted)                                                                                            | RGD1561416_predicted                                  | 2.78±0.5   |
| similar to novel protein (predicted)                                                                                                    | RGD1563106_predicted                                  | 0.92±0.38  |
| similar to novel protein (predicted)                                                                                                    | RGD1560636_predicted                                  | 0.29±0.18  |
| similar to novel protein of unknown function (DUF423) family member (predicted)                                                         | RGD1563438_predicted                                  | 14.74±1.6  |
| similar to Nuclear membrane binding protein NUCLING (predicted)                                                                         | RGD1560011_predicted                                  | 0.96±0.17  |
| similar to Nucleolar protein 11                                                                                                         | LOC688235                                             | 1.66±0.06  |
| similar to nucleolar protein with MIF4G domain 1                                                                                        | LOC682058                                             | 1.94±0.39  |
| similar to O-acetyltransferase                                                                                                          | LOC678772                                             | 0.91±0.09  |
| similar to olfactory receptor 873                                                                                                       | LOC687016                                             | 0.43±0.14  |
| similar to Oligosaccharyl transferase 3 CG7748-PA                                                                                       | RGD1311563                                            | 14.34±1.89 |
| similar to oocyte-testis gene 1 (predicted)                                                                                             | RGD1307158_predicted                                  | 0.46±0.08  |
| similar to OPA3 protein (predicted)                                                                                                     | RGD1561117_predicted                                  | 2.73±0.44  |
| similar to opposite strand transcription unit to Stag3; Gats protein                                                                    | RGD1304774                                            | 3.11±0.34  |
| similar to OTTHUMP00000040081 (predicted)                                                                                               | RGD1566403_predicted                                  | 0.92±0.1   |
| similar to p150 target of rapamycin (TOR)-scaffold protein containing WD-repeats (predicted)                                            | RGD1311784_predicted                                  | 0.54±0.12  |
| similar to Paired amphipathic helix protein Sin3b (Transcriptional corepressor Sin3b) (Histone deacetylase complex subunit Sin3b)       | LOC683381                                             | 2.63±0.46  |
| Similar to Pellino protein homolog 2 (Pellino 2) (predicted)                                                                            | RGD1565884_predicted                                  | 0.86±0.25  |
| similar to peptide deformylase-like protein                                                                                             | LOC690214                                             | 1.93±0.21  |
| similar to peptidyl prolyl isomerase H (predicted)                                                                                      | RGD1564921_predicted                                  | 1.18±0.16  |
| similar to Peptidyl-prolyl cis-trans isomerase NIMA-interacting 4 (Rotamase Pin4) (PPLase Pin4)                                         | LOC684441                                             | 0.63±0.07  |
| similar to peptidylprolyl isomerase D                                                                                                   | LOC295142 /// LOC364127<br>/// LOC501602 /// Ppid /// | 0.37±0.02  |
|                                                                                                                                         | RGD1560149_predicted                                  |            |
| similar to pericentrin                                                                                                                  | LOC687681                                             | 0.64±0.24  |
| similar to Peroxisomal biogenesis factor 19 (Peroxin-19) (Peroxisomal farnesylated protein)                                             | LOC289233                                             | 0.99±0.03  |
| similar to PES1 protein                                                                                                                 | LOC289740                                             | 1.15±0.15  |
| Similar to PHD finger protein 14 isoform 1 (predicted)                                                                                  | RGD1563764_predicted                                  | 1.39±1.54  |
| similar to PHD zinc finger containing protein JUNE1                                                                                     | MGC94192                                              | 1.13±0.07  |
| similar to PHF21A protein (predicted)                                                                                                   | RGD1560612_predicted                                  | 0.44±0.15  |
| similar to phosphoserine-tRNA kinase (predicted)                                                                                        | RGD1564300_predicted                                  | 1.76±0.42  |
| Similar to PI-3-kinase-related kinase SMG-1                                                                                             | Arl6ip1                                               | 2.42±0.66  |
| similar to Placental protein 25 homolog (PP25)                                                                                          | LOC685284                                             | 1.91±0.46  |
| similar to plasma kallikrein-like protein 4 precursor /// gene trap locus 3                                                             | Gt3 /// RGD1307877                                    | 1.66±0.05  |
| similar to plexin 1 (predicted)                                                                                                         | RGD1560871_predicted                                  | 0.39±0.18  |
| similar to polyglutamine-containing protein                                                                                             | RGD1310994                                            | 1.25±0.58  |
| similar to POT1-like telomere end-binding protein                                                                                       | LOC500054                                             | 0.62±0.02  |
| similar to potassium channel modulatory factor 1                                                                                        | LOC684322                                             | 4.28±0.48  |
| similar to praja1, RING-H2 motif containing                                                                                             | LOC683077                                             | 6.86±0.35  |
| similar to prefoldin 4 (predicted)                                                                                                      | RGD1560211_predicted                                  | 3.56±0.05  |
| similar to Prefoldin subunit 2 /// prefoldin 2                                                                                          | LOC678975 /// Pfdn2                                   | 0.53±0.08  |
| similar to Prefoldin subunit 3 (Von Hippel-Lindau-binding protein 1) (VHL-binding protein 1) (VBP-1)                                    | LOC681825                                             | 0.36±0.08  |
| similar to PRO1853 homolog                                                                                                              | RGD1311578                                            | 1.35±0.27  |
| similar to procollagen C-endopeptidase enhancer 2                                                                                       | LOC684050                                             | 1±0.13     |
| similar to product is unknown-seizure-related gene (predicted) /// similar to Ornithine decarboxylase antizyme 2 (ODC-Az 2) (AZ2)       | LOC690789 ///                                         | 3.81±0.49  |
|                                                                                                                                         | RGD1562933_predicted                                  |            |
| similar to Proline oxidase, mitochondrial precursor (Proline dehydrogenase)                                                             | LOC680409                                             | 1.91±0.45  |
| similar to Protease-associated domain-containing protein of 21 kDa precursor                                                            | LOC686393                                             | 1.61±0.21  |
| similar to Proteasome inhibitor PI31 subunit                                                                                            | LOC682071 /// LOC689852                               | 3.22±0.41  |
| similar to Protein C10orf11 homolog                                                                                                     | LOC681383                                             | 1.68±0.34  |
| similar to Protein C12orf11 (Sarcoma antigen NY-SAR-95)                                                                                 | LOC690728                                             | 1.34±0.21  |
| similar to Protein C20orf20                                                                                                             | RGD1308612                                            | 1.11±0.27  |
| similar to protein C33A12.3                                                                                                             | RGD1359508                                            | 1.19±0.51  |
| similar to Protein C6orf115                                                                                                             | LOC684848 /// LOC685045                               | 7.58±0.37  |
| similar to Protein C6orf203                                                                                                             | LOC683897                                             | 1.1±0.2    |
| similar to Protein C7orf26 homolog                                                                                                      | LOC683674                                             | 0.34±0.29  |
| similar to Protein CGI-117 (Protein HSPC111) (predicted)                                                                                | RGD1305727_predicted                                  | 2.56±0.13  |
| similar to Protein disulfide-isomerase TXNDC10 precursor (Thioredoxin domain-containing protein 10)                                     | LOC682967                                             | 1.67±0.34  |
| similar to Protein FAM60A (Tera protein)                                                                                                | LOC686611                                             | 0.26±0.11  |
| similar to Protein KIAA0280                                                                                                             | LOC503175 /// LOC690188                               | 6.65±0.59  |

|                                                                                                                                                               |                          |            |
|---------------------------------------------------------------------------------------------------------------------------------------------------------------|--------------------------|------------|
| similar to Protein KIAA1404                                                                                                                                   | LOC686701                | 0.33±0.21  |
| similar to Protein KIAA1543                                                                                                                                   | LOC682941 /// LOC689074  | 1.49±0.41  |
| similar to Protein KIAA1688                                                                                                                                   | LOC500901                | 0.26±0.19  |
| similar to Protein Njmu-R1 (predicted)                                                                                                                        | RGD1310429_predicted     | 0.29±0.13  |
| similar to Protein SYS1 homolog                                                                                                                               | LOC685079                | 3.26±0.46  |
| similar to Protein transport protein SEC61 gamma subunit                                                                                                      | LOC689134                | 17.57±1.11 |
| similar to protein tyrosine phosphatase, receptor type, D (predicted)                                                                                         | RGD1561090_predicted     | 13.93±1.72 |
| similar to Protein UNQ655/PRO1286 homolog precursor                                                                                                           | LOC686324                | 2.38±0.16  |
| Similar to putative phosphoinositide 5-phosphatase type II; C62                                                                                               | LOC287533                | 0.87±0.09  |
| similar to Putative protein 15E1.2 (predicted)                                                                                                                | RGD1309698_predicted     | 0.98±0.13  |
| similar to putative protein, with at least 9 transmembrane domains, of eukaryotic origin (43.9 kD) (2G415)                                                    | RGD1309228               | 0.74±0.23  |
| similar to putative repair and recombination helicase RAD26L (predicted)                                                                                      | RGD1561537_predicted     | 1.96±0.09  |
| similar to Putative RNA-binding protein 15 (RNA-binding motif protein 15) (One-twenty two protein)                                                            | LOC684233                | 1.54±0.25  |
| similar to R31449_3 (predicted)                                                                                                                               | RGD1563634_predicted     | 0.91±0.34  |
| similar to RAB11 family interacting protein 5 (class I) isoform 1                                                                                             | LOC312502                | 5.71±0.19  |
| similar to RAB3 GTPase-activating protein (predicted)                                                                                                         | RGD1306487_predicted     | 2.34±0.19  |
| similar to Rap2-binding protein 9                                                                                                                             | MGC124740                | 0.49±0.04  |
| similar to Ras GTPase-activating-like protein IQGAP2 (predicted)                                                                                              | RGD1561455_predicted     | 8.25±0.55  |
| Similar to Ras suppressor protein 1                                                                                                                           | LOC680419                | 0.71±0.02  |
| similar to Ras-related protein Rab-1B /// RAB1B, member RAS oncogene family                                                                                   | MGC105830 /// rCG_48149  | 2.74±0.64  |
| similar to RCK (predicted)                                                                                                                                    | RGD1564560_predicted     | 2.05±0.55  |
| similar to receptor-interacting factor 1                                                                                                                      | RGD1306520               | 0.69±0.09  |
| similar to Recombining binding protein suppressor of hairless (J kappa-recombination signal binding protein) (RBP-J kappa)                                    | LOC679028                | 1.97±0.34  |
| similar to reduced expression 2                                                                                                                               | LOC690559                | 0.45±0.27  |
| similar to replication protein-binding trans-activator RBT1                                                                                                   | MGC108974                | 0.48±0.14  |
| similar to REST corepressor 3                                                                                                                                 | LOC684192                | 0.51±0.03  |
| Similar to Retinoblastoma-binding protein 2 (RBBP-2)                                                                                                          | LOC312678                | 2.32±0.17  |
| similar to Retinoblastoma-binding protein 8 (RBBP-8) (CtBP interacting protein) (CtIP) (Retinoblastoma-interacting protein and myosin-like) (RIM) (predicted) | RGD1308872_predicted     | 1.01±0.19  |
| similar to ribosomal protein L27a (predicted)                                                                                                                 | RGD1560633_predicted     | 3.98±1.19  |
| similar to ribosomal protein, mitochondrial, S22                                                                                                              | LOC683519                | 2.59±0.41  |
| similar to RIKEN cDNA 0610007P06                                                                                                                              | LOC293103                | 3.48±0.19  |
| similar to RIKEN cDNA 0610007P22 (predicted)                                                                                                                  | RGD1565744_predicted     | 0.77±0.08  |
| Similar to RIKEN cDNA 0610010D20 (predicted)                                                                                                                  | RGD1310475_predicted     | 25.19±0.91 |
| similar to RIKEN cDNA 0610011L14 gene                                                                                                                         | RGD1311066               | 1.07±0.22  |
| similar to RIKEN cDNA 0610012D14                                                                                                                              | RGD1310111               | 4.07±0.53  |
| similar to RIKEN cDNA 0610037D15                                                                                                                              | LOC298442                | 0.25±0.09  |
| similar to RIKEN cDNA 0610037L13                                                                                                                              | RGD1559786               | 1.16±0.26  |
| similar to RIKEN cDNA 0610037P05                                                                                                                              | RGD1305823               | 2±0.25     |
| similar to RIKEN cDNA 0610038D11 (predicted)                                                                                                                  | RGD1309710_predicted     | 2.49±0.46  |
| similar to RIKEN cDNA 0610038L10 gene (predicted) /// riboflavin kinase /// similar to riboflavin kinase (predicted)                                          | Rfk ///                  | 7.04±0.25  |
|                                                                                                                                                               | RGD1560961_predicted /// |            |
|                                                                                                                                                               | RGD1563242_predicted     |            |
| similar to RIKEN cDNA 0610039J04                                                                                                                              | RGD1562218               | 0.88±0.11  |
| similar to RIKEN cDNA 0610040J01                                                                                                                              | LOC498368                | 7.1±0.79   |
| similar to RIKEN cDNA 1100001H23                                                                                                                              | RGD1308734               | 3.32±0.4   |
| similar to RIKEN cDNA 1110001A07 gene /// hypothetical protein LOC687897 /// hypothetical protein LOC691962                                                   | LOC687897 /// LOC691962  | 0.5±0.11   |
|                                                                                                                                                               | /// RGD1307084           |            |
| similar to RIKEN cDNA 1110001J03                                                                                                                              | MGC112899                | 5.61±0.32  |
| similar to RIKEN cDNA 1110001M20 (predicted)                                                                                                                  | RGD1310313_predicted     | 23.58±1.83 |
| similar to RIKEN cDNA 1110003E01                                                                                                                              | RGD1311122               | 3.85±0.06  |
| similar to RIKEN cDNA 1110004E09                                                                                                                              | RGD1306954               | 2.91±0.27  |
| similar to RIKEN cDNA 1110005A03                                                                                                                              | RGD1306284               | 3.4±0.74   |
| similar to RIKEN cDNA 1110007C09 (predicted)                                                                                                                  | RGD1306058_predicted     | 2.62±0.32  |
| similar to RIKEN cDNA 1110007L15 (predicted)                                                                                                                  | RGD1311660_predicted     | 2.22±0.4   |
| similar to RIKEN cDNA 1110008F13                                                                                                                              | RGD1307752               | 15.64±1.27 |
| similar to RIKEN cDNA 1110008J03 (predicted)                                                                                                                  | RGD1306772_predicted     | 0.43±0.33  |
| similar to RIKEN cDNA 1110012L19 (predicted)                                                                                                                  | RGD1562747_predicted     | 0.92±0.07  |
| similar to RIKEN cDNA 1110018J12 (predicted)                                                                                                                  | RGD1565310_predicted     | 1.94±0.07  |
| Similar to RIKEN cDNA 1110020A23 (predicted)                                                                                                                  | RGD1308134_predicted     | 0.67±0.05  |
| similar to RIKEN cDNA 1110031I02                                                                                                                              | RGD1305007               | 1.63±0.27  |
| Similar to RIKEN cDNA 1110038F21 (predicted)                                                                                                                  | RGD1562059_predicted     | 0.64±0.23  |
| similar to RIKEN cDNA 1110059E24                                                                                                                              | RGD1359158               | 2.3±0.13   |
| similar to RIKEN cDNA 1110059G10                                                                                                                              | RGD1311745               | 2.57±0.24  |
| similar to RIKEN cDNA 1190005P17 (predicted)                                                                                                                  | RGD1308261_predicted     | 1.3±0.59   |
| similar to RIKEN cDNA 1200003C05 (predicted)                                                                                                                  | RGD1308917_predicted     | 6.24±1.05  |
| similar to RIKEN cDNA 1200009B18; EST AA408438                                                                                                                | RGD1310606               | 3.52±0.79  |
| similar to RIKEN cDNA 1200011M11 (predicted)                                                                                                                  | RGD1306862_predicted     | 0.51±0.21  |
| similar to RIKEN cDNA 1200014J11 (predicted)                                                                                                                  | RGD1308139_predicted     | 1.01±0.26  |
| similar to RIKEN cDNA 1200014M14                                                                                                                              | RGD1310597               | 0.21±0.02  |
| similar to RIKEN cDNA 1200016B10 (predicted)                                                                                                                  | RGD1308695_predicted     | 1.19±0.03  |
| similar to RIKEN cDNA 1300018I05                                                                                                                              | RGD1307801               | 3.07±0.55  |
| similar to RIKEN cDNA 1500002O20                                                                                                                              | RGD1309888               | 1.15±0.23  |
| similar to RIKEN cDNA 1500003O22                                                                                                                              | RGD1308302               | 0.48±0.15  |
| similar to RIKEN cDNA 1500011H22                                                                                                                              | RGD1310861               | 1.16±0.16  |
| similar to RIKEN cDNA 1500031L02                                                                                                                              | RGD621352                | 2.8±0.25   |
| similar to RIKEN cDNA 1600012F09 (predicted)                                                                                                                  | RGD1306613_predicted     | 1.94±0.21  |
| similar to RIKEN cDNA 1700012G19 gene (predicted)                                                                                                             | RGD1307773_predicted     | 2.2±0.43   |
| similar to RIKEN cDNA 1700019G17 (predicted) /// similar to Camello-like 2                                                                                    | LOC681227 ///            | 0.56±0.36  |
|                                                                                                                                                               | RGD1563507_predicted     |            |
| similar to RIKEN cDNA 1700023M03                                                                                                                              | RGD1305457               | 0.28±0.16  |
| Similar to RIKEN cDNA 1700027M01                                                                                                                              | RGD1311815               | 0.63±0.05  |
| similar to RIKEN cDNA 1700027N10 (predicted)                                                                                                                  | RGD1310693_predicted     | 1.26±0.1   |

|                                                                                               |                      |            |
|-----------------------------------------------------------------------------------------------|----------------------|------------|
| similar to RIKEN cDNA 1700040L02 (predicted)                                                  | RGD1306739_predicted | 0.59±0.22  |
| similar to RIKEN cDNA 1700052N19                                                              | RGD1305235           | 2.43±0.3   |
| similar to RIKEN cDNA 1700088E04                                                              | RGD1359634           | 0.42±0.07  |
| similar to RIKEN cDNA 1700108L22                                                              | RGD1307509           | 1.13±0.23  |
| similar to RIKEN cDNA 1810007P19                                                              | RGD1306596           | 0.56±0.1   |
| similar to RIKEN cDNA 1810014F10 gene (predicted)                                             | RGD1311186_predicted | 4.7±0.13   |
| similar to RIKEN cDNA 1810020D17 (predicted)                                                  | RGD1561459_predicted | 1.51±0.25  |
| similar to RIKEN cDNA 1810021J13                                                              | RGD1311364           | 1.2±0.16   |
| similar to RIKEN cDNA 1810022C23                                                              | RGD1310224           | 36.11±3.29 |
| similar to RIKEN cDNA 1810029B16 (predicted)                                                  | RGD1305222_predicted | 0.47±0.07  |
| similar to RIKEN cDNA 1810030N24 (predicted)                                                  | RGD1305158_predicted | 3.2±0.32   |
| similar to RIKEN cDNA 1810030O07 (predicted)                                                  | RGD1565685_predicted | 1.42±0.19  |
| Similar to RIKEN cDNA 1810036I24 (predicted)                                                  | RGD1306343_predicted | 9.29±1.24  |
| similar to RIKEN cDNA 1810042K04 (predicted)                                                  | RGD1305593_predicted | 0.9±0.15   |
| similar to RIKEN cDNA 1810043G02; DNA segment, Chr 10, Johns Hopkins University 13, expressed | RGD1309594           | 0.32±0.1   |
| similar to RIKEN cDNA 1810046J19 (predicted)                                                  | RGD1306682_predicted | 6.07±0.35  |
| similar to RIKEN cDNA 1810063B07 gene (predicted)                                             | RGD1310877_predicted | 1.45±0.05  |
| similar to RIKEN cDNA 1810074P20 (predicted)                                                  | RGD1309308_predicted | 1.34±0.26  |
| similar to RIKEN cDNA 2010011I20 (predicted)                                                  | RGD1311378_predicted | 1.45±0.23  |
| similar to RIKEN cDNA 2010012F05 (predicted)                                                  | RGD1309846_predicted | 2.72±0.26  |
| Similar to RIKEN cDNA 2010012O05 (predicted)                                                  | RGD1311783_predicted | 2.87±0.41  |
| similar to RIKEN cDNA 2010107G23 (predicted) /// hypothetical protein LOC679430               | LOC679430 ///        | 4.31±0.72  |
| similar to RIKEN cDNA 2010110K16 (predicted)                                                  | RGD1305587_predicted |            |
| similar to RIKEN cDNA 2010200O16 (predicted)                                                  | RGD1305283_predicted | 2.38±0.37  |
| similar to RIKEN cDNA 2010301N04 (predicted)                                                  | RGD1564454_predicted | 1.53±0.11  |
| similar to RIKEN cDNA 2010305A19 (predicted)                                                  | RGD1565557_predicted | 1.17±0.49  |
| similar to RIKEN cDNA 2010309E21 (predicted)                                                  | RGD1305274_predicted | 0.66±0.07  |
| similar to RIKEN cDNA 2010311D03                                                              | RGD1304825_predicted | 1.8±0.3    |
| similar to RIKEN cDNA 2010316F05 (predicted)                                                  | RGD1303272           | 14.93±2.37 |
| similar to RIKEN cDNA 2210009G21 (predicted)                                                  | RGD1308179_predicted | 0.42±0.15  |
| similar to RIKEN cDNA 2210010N04 gene                                                         | RGD1563120_predicted | 0.59±0.04  |
| similar to RIKEN cDNA 2210012G02                                                              | RGD1306873           | 0.29±0.14  |
| similar to RIKEN cDNA 2210016L21 gene                                                         | LOC366431            | 0.47±0.16  |
| similar to RIKEN cDNA 2310001A20                                                              | RGD1311899           | 3.1±0.15   |
| similar to RIKEN cDNA 2310002J15 (predicted)                                                  | RGD1308874           | 38.2±0.92  |
| similar to RIKEN cDNA 2310004I24 gene                                                         | RGD1560880_predicted | 0.32±0.02  |
| Similar to RIKEN cDNA 2310005N03 gene                                                         | RGD1309906           | 0.95±0.03  |
| similar to RIKEN cDNA 2310007F12 (predicted)                                                  | RGD1309105_predicted | 0.38±0.16  |
| similar to RIKEN cDNA 2310008H04 (predicted)                                                  | RGD1562416_predicted | 1.36±0.2   |
| similar to RIKEN cDNA 2310011J03                                                              | RGD1566036_predicted | 0.5±0.19   |
| similar to RIKEN cDNA 2310022B05 (predicted)                                                  | RGD1359127           | 0.99±0.06  |
| similar to RIKEN cDNA 2310028N02                                                              | RGD1559896_predicted | 4.34±0.95  |
| similar to RIKEN cDNA 2310033P09                                                              | RGD1359339           | 3.85±0.21  |
| similar to RIKEN cDNA 2310035C23 (predicted)                                                  | RGD1304587           | 1.09±0.14  |
| similar to RIKEN cDNA 2310036O22 (predicted) /// similar to CG18809-PA, isoform A             | RGD1307235_predicted | 2.72±0.4   |
|                                                                                               | LOC690331 ///        | 5.9±0.94   |
| similar to RIKEN cDNA 2310042G06                                                              | RGD1564093_predicted |            |
| similar to RIKEN cDNA 2310047O13 (predicted)                                                  | MGC72955             | 3.82±0.68  |
| similar to RIKEN cDNA 2310057M21                                                              | RGD1309605_predicted | 5.63±0.94  |
| similar to RIKEN cDNA 2310061F22                                                              | RGD1305014           | 0.33±0.12  |
| similar to RIKEN cDNA 2310079N02 (predicted)                                                  | LOC292069            | 0.21±0.07  |
| similar to RIKEN cDNA 2400003C14                                                              | RGD1306192_predicted | 3.65±0.1   |
| similar to RIKEN cDNA 2400010D15                                                              | RGD1307799           | 4.5±0.5    |
| similar to RIKEN cDNA 2410002O22 gene                                                         | RGD1311805           | 1.13±0.1   |
| similar to RIKEN cDNA 2410004B18 (predicted)                                                  | RGD1306583           | 3.68±0.63  |
| similar to RIKEN cDNA 2410016O06 (predicted)                                                  | RGD1560065_predicted | 0.47±0.39  |
| similar to RIKEN cDNA 2410022L05 (predicted)                                                  | RGD1307704_predicted | 0.76±0.19  |
| similar to RIKEN cDNA 2410025L10 (predicted)                                                  | RGD1565675_predicted | 5.86±0.68  |
| similar to RIKEN cDNA 2510039O18 (predicted)                                                  | RGD1563342_predicted | 1.3±0.11   |
| similar to RIKEN cDNA 2610002M06 (predicted)                                                  | RGD1305350_predicted | 1.75±0.03  |
| similar to RIKEN cDNA 2610003J06                                                              | RGD1566265_predicted | 0.56±0.06  |
| similar to RIKEN cDNA 2610029G23 (predicted)                                                  | RGD1307381           | 1.56±0.17  |
| similar to RIKEN cDNA 2610205E22                                                              | RGD1562502_predicted | 1.03±0.27  |
| similar to RIKEN cDNA 2610209A20 (predicted)                                                  | RGD1306582           | 1.86±0.18  |
| similar to RIKEN cDNA 2610301B20; EST AI428449                                                | RGD1305211_predicted | 0.58±0.12  |
| similar to RIKEN cDNA 2610304G08 gene (predicted)                                             | MGC94199             | 1.24±0.11  |
| similar to RIKEN cDNA 2610528E23                                                              | RGD1304782_predicted | 1.03±0.2   |
| similar to RIKEN cDNA 2610528J11 (predicted)                                                  | RGD1309437           | 1.07±0.27  |
| similar to RIKEN cDNA 2700002I20                                                              | RGD1305347_predicted | 9.25±1.15  |
| similar to RIKEN cDNA 2700038C09                                                              | RGD1307279           | 3.93±0.68  |
| similar to RIKEN cDNA 2700062C07                                                              | RGD1310660           | 3.15±1.12  |
| similar to RIKEN cDNA 2810002N01                                                              | MGC116121            | 0.54±0.12  |
| similar to RIKEN cDNA 2810025M15 (predicted)                                                  | RGD1304719           | 1.48±0.19  |
| similar to RIKEN cDNA 2810055F11 (predicted)                                                  | RGD1304982_predicted | 21.87±1.04 |
| similar to RIKEN cDNA 2810403A07                                                              | RGD1305721_predicted | 13.23±1.07 |
| similar to RIKEN cDNA 2810405K02 (predicted)                                                  | RGD1565775           | 2.34±0.51  |
| similar to RIKEN cDNA 2810428I15 (predicted)                                                  | RGD1308251_predicted | 14.72±1.79 |
| Similar to RIKEN cDNA 2810443J12 (predicted)                                                  | RGD1566239_predicted | 0.6±0.23   |
| similar to RIKEN cDNA 2810451A06                                                              | RGD1304868_predicted | 0.22±0.1   |
| similar to RIKEN cDNA 2810485I05 (predicted)                                                  | RGD1311098           | 9.67±0.71  |
| similar to RIKEN cDNA 2900010J23                                                              | RGD1311077_predicted | 0.5±0.16   |
| similar to RIKEN cDNA 2900010M23 (predicted)                                                  | LOC499779            | 0.68±1.38  |
| similar to RIKEN cDNA 2900011O08                                                              | RGD1306917_predicted | 1.69±0.6   |
| similar to RIKEN cDNA 3010026O09 (predicted)                                                  | RGD1305733           | 1.03±0.08  |
| similar to RIKEN cDNA 3110001D03 (predicted)                                                  | RGD1564036_predicted | 0.33±0.04  |
| similar to RIKEN cDNA 3110001I22 (predicted)                                                  | RGD1309148_predicted | 1.87±0.16  |
|                                                                                               | RGD1305537_predicted | 1.09±0.09  |

|                                                                                                        |                      |            |
|--------------------------------------------------------------------------------------------------------|----------------------|------------|
| similar to RIKEN cDNA 3110040N11                                                                       | RGD1305713           | 1.06±0.1   |
| similar to RIKEN cDNA 3110043O21                                                                       | RGD1359108           | 0.23±0.04  |
| Similar to RIKEN cDNA 3110050N22 (predicted)                                                           | RGD1311970_predicted | 0.39±0.21  |
| similar to RIKEN cDNA 3200002M19 (predicted)                                                           | RGD1311634_predicted | 1.09±0.07  |
| similar to RIKEN cDNA 3930401K13                                                                       | RGD1309459           | 5.26±0.48  |
| similar to RIKEN cDNA 4121402D02 (predicted)                                                           | RGD1564778_predicted | 1.32±0.37  |
| similar to RIKEN cDNA 4632411B12                                                                       | RGD1309220           | 1.01±0.23  |
| similar to RIKEN cDNA 4732418C07 (predicted)                                                           | RGD1310351_predicted | 1.66±0.27  |
| similar to RIKEN cDNA 4921524J17 (predicted)                                                           | RGD1308706_predicted | 2.53±0.52  |
| similar to RIKEN cDNA 4921536K21 (predicted)                                                           | RGD1308775_predicted | 0.22±0.1   |
| similar to RIKEN cDNA 4930444A02                                                                       | RGD1310810           | 0.48±0.08  |
| similar to RIKEN cDNA 4930455F23                                                                       | RGD1309708           | 0.62±0.03  |
| similar to RIKEN cDNA 4930579G22 (predicted)                                                           | RGD1560258_predicted | 0.82±0.12  |
| similar to RIKEN cDNA 4931406C07                                                                       | RGD1309534           | 24.34±3.81 |
| similar to RIKEN cDNA 4931406P16 (predicted)                                                           | RGD1308428_predicted | 0.23±0.03  |
| similar to RIKEN cDNA 4931414P19 (predicted)                                                           | RGD1565222_predicted | 0.28±0.06  |
| similar to RIKEN cDNA 4932432K03                                                                       | RGD1308087           | 1.59±0.08  |
| similar to RIKEN cDNA 4933428G09 (predicted)                                                           | RGD1311045_predicted | 0.29±0.06  |
| similar to RIKEN cDNA 4933433P14 gene                                                                  | RGD1308470           | 0.55±0.14  |
| similar to RIKEN cDNA 4933435A13                                                                       | RGD1306402           | 0.32±0.07  |
| Similar to RIKEN cDNA 5033406L14                                                                       | RGD1305755           | 1.29±0.11  |
| similar to RIKEN cDNA 5033414D02 (predicted)                                                           | RGD1306839_predicted | 1.6±0.28   |
| similar to RIKEN cDNA 5133400G04                                                                       | RGD1311742           | 0.54±0.07  |
| similar to RIKEN cDNA 5133401N09                                                                       | MGC125086            | 1.2±0.05   |
| similar to RIKEN cDNA 5230400G24                                                                       | RGD1310230           | 8.24±0.58  |
| similar to RIKEN cDNA 5330440M15 /// coiled-coil domain containing 17                                  | Ccdc17 /// LOC313519 | 1.69±0.31  |
| similar to RIKEN cDNA 5430437P03                                                                       | MGC94542             | 2.8±1.01   |
| similar to RIKEN cDNA 5730449L18 (predicted)                                                           | RGD1308584_predicted | 3.94±0.24  |
| similar to RIKEN cDNA 5730453I16                                                                       | RGD1305441           | 3.19±0.81  |
| similar to RIKEN cDNA 5730454B08 (predicted)                                                           | RGD1308290_predicted | 0.99±0.19  |
| Similar to RIKEN cDNA 5730469D23 (predicted)                                                           | RGD1308324_predicted | 0.88±0.19  |
| similar to RIKEN cDNA 5730469M10                                                                       | RGD1309676           | 2.27±0.35  |
| similar to RIKEN cDNA 5730509K17 gene (predicted)                                                      | RGD1561042_predicted | 1.52±0.05  |
| similar to RIKEN cDNA 5730557B15 (predicted)                                                           | RGD1564227_predicted | 0.72±0.11  |
| similar to RIKEN cDNA 5730596K20 (predicted)                                                           | RGD1309871_predicted | 0.49±0.09  |
| similar to RIKEN cDNA 5830433M19                                                                       | MGC125002            | 1.6±0.06   |
| similar to RIKEN cDNA 6330409N04                                                                       | RGD1306437           | 4.96±0.39  |
| similar to RIKEN cDNA 6330416G13 gene (predicted)                                                      | RGD1304595_predicted | 1.56±0.38  |
| similar to RIKEN cDNA 6530403A03                                                                       | RGD1309020           | 0.22±0.09  |
| similar to RIKEN cDNA 8430406I07                                                                       | RGD1307465           | 1.04±0.12  |
| Similar to RIKEN cDNA 9030221M09 gene (predicted)                                                      | RGD1305469_predicted | 1.18±0.13  |
| similar to RIKEN cDNA 9030624J02                                                                       | LOC361635            | 3.07±0.18  |
| similar to RIKEN cDNA 9430023L20                                                                       | RGD1359310           | 0.75±0.08  |
| Similar to RIKEN cDNA 9430077D24 gene                                                                  | LOC290341            | 1.8±0.21   |
| similar to RIKEN cDNA 9430098E02 (predicted) /// hypothetical protein LOC680815                        | LOC680815 ///        | 1.87±0.34  |
|                                                                                                        | RGD1565407_predicted |            |
|                                                                                                        | LOC685702 ///        | 1.01±1.29  |
| similar to RIKEN cDNA A030007L17; EST AA673177 (predicted) /// similar to C44B7.7                      | RGD1304876_predicted |            |
|                                                                                                        | RGD1304567           | 2.89±0.18  |
|                                                                                                        | LOC367113            | 2.13±0.11  |
| similar to RIKEN cDNA A430005L14                                                                       | LOC311984            | 0.83±0.12  |
| Similar to RIKEN cDNA A430093J20 gene                                                                  | RGD1310799_predicted | 0.57±0.05  |
| similar to RIKEN cDNA A530088I07 gene                                                                  | RGD1560629_predicted | 1.43±0.14  |
| similar to RIKEN cDNA A930008G19 (predicted)                                                           | RGD1309730_predicted | 1.81±0.17  |
| similar to RIKEN cDNA A930016P21 (predicted)                                                           | RGD1311249           | 0.45±0.05  |
| similar to RIKEN cDNA B230118H07 (predicted)                                                           | RGD1311456_predicted | 0.66±0.18  |
| Similar to RIKEN cDNA B230312A22                                                                       | MGC94207             | 6.32±0.66  |
| similar to RIKEN cDNA B230380D07 (predicted)                                                           | RGD1305225           | 0.35±0.11  |
| similar to RIKEN cDNA C030006K11                                                                       | LOC499749            | 3.95±0.54  |
| similar to RIKEN cDNA C130022K22 gene                                                                  | RGD1310199           | 2.15±0.33  |
| similar to RIKEN cDNA C430004E15                                                                       | RGD1310722_predicted | 0.8±0.24   |
| similar to RIKEN cDNA D030070L09                                                                       | RGD621098            | 0.64±0.02  |
| similar to RIKEN cDNA D130059P03 gene (predicted)                                                      | RGD1307179_predicted | 1.02±0.2   |
| similar to RIKEN cDNA D230025D16Rik                                                                    | RGD1307100           | 3.01±0.5   |
| similar to RIKEN cDNA D530033C11 (predicted)                                                           | RGD1311589_predicted | 3.52±0.84  |
| similar to RIKEN cDNA D630029K19                                                                       | RGD1310951_predicted | 0.96±0.05  |
| similar to RIKEN cDNA E130201N16 (predicted)                                                           | RGD1560873_predicted | 0.92±0.22  |
| similar to RIKEN cDNA E130308A19 (predicted)                                                           | RGD1310800_predicted | 0.79±0.15  |
| similar to RIKEN cDNA E230015L20 gene (predicted)                                                      | LOC681578            | 14.14±0.57 |
| similar to RIKEN cDNA F730014I05 (predicted)                                                           | RGD1561067_predicted | 5.46±0.9   |
| similar to ring finger protein 13                                                                      | RGD1561222_predicted | 3.67±0.73  |
| similar to RNA binding protein gene with multiple splicing (predicted)                                 | MGC112727            | 6.28±0.81  |
| Similar to RNA binding protein with multiple splicing 2 (predicted)                                    | LOC686263            | 1.07±0.15  |
| similar to RNA polymerase 1-3                                                                          | RGD1305440           | 0.31±0.07  |
| similar to RNA-binding region (RNP1, RRM) containing 3                                                 | LOC301126            | 0.78±0.25  |
| similar to Rnf37-pending protein                                                                       | RGD1559538_predicted | 2.41±0.19  |
| similar to scaffold attachment factor B2                                                               | LOC498353            | 0.99±0.21  |
| Similar to SCO cytochrome oxidase deficient homolog 1 (yeast) (predicted)                              | LOC685144            | 2.98±0.14  |
| similar to Sec1 family domain containing protein 2 (Syntaxin binding protein 1-like 1) (Neuronal Sec1) | RGD1563348_predicted | 10.33±0.66 |
| similar to SEC24 related gene family, member C                                                         | LOC365960            | 12.75±0.66 |
| similar to Selenoprotein H (predicted)                                                                 | RGD1310348_predicted | 4.55±0.27  |
| similar to semaF cytoplasmic domain associated protein 2                                               | LOC691318            | 0.64±0.19  |
| similar to Ser/Thr-rich protein T10 in DGCR region (predicted)                                         | LOC683605            | 1.05±0.28  |
| Similar to Serine                                                                                      | LOC687992            | 0.9±0.23   |
| similar to serologically defined colon cancer antigen 3 isoform 1                                      | RGD1566319_predicted | 5.52±1.79  |
| similar to Serum amyloid A-3 protein precursor                                                         | RGD1561347_predicted | 0.78±0.36  |
| similar to Sestrin 2 (Hi95) (predicted)                                                                | LOC688018            | 3.85±0.52  |
| similar to Sfrs4 protein (predicted)                                                                   |                      |            |
| Similar to SH3-domain binding protein 3                                                                |                      |            |

|                                                                                                                                                           |                                                  |            |
|-----------------------------------------------------------------------------------------------------------------------------------------------------------|--------------------------------------------------|------------|
| similar to Shb protein (predicted)                                                                                                                        | RGD1565350_predicted                             | 1.91±0.39  |
| similar to sid2057p                                                                                                                                       | RGD1311703                                       | 3.92±0.46  |
| similar to signal peptidase complex subunit 3 homolog                                                                                                     | LOC680782                                        | 12.12±0.87 |
| similar to Signal recognition particle 9 kDa protein (SRP9) /// signal recognition particle 9                                                             | LOC682826 /// Srp9                               | 5.45±1.21  |
| similar to Ski protein (predicted)                                                                                                                        | RGD1565591_predicted                             | 1.61±0.51  |
| similar to Smad ubiquitination regulatory factor 1 isoform 2                                                                                              | LOC690516                                        | 0.37±0.05  |
| similar to small nuclear ribonucleoprotein D3                                                                                                             | LOC687711                                        | 2.42±0.65  |
| similar to small nuclear ribonucleoprotein polypeptide G                                                                                                  | LOC681031 /// LOC687679                          | 4.89±0.64  |
| Similar to small nuclear RNA activating complex, polypeptide 5                                                                                            | LOC691501                                        | 1.78±0.3   |
| similar to small unique nuclear receptor co-repressor (predicted)                                                                                         | RGD1560600_predicted                             | 0.31±0.07  |
| similar to small unique nuclear receptor co-repressor (predicted) /// nuclear DNA binding protein                                                         | C1d ///                                          | 5.71±0.4   |
| similar to SMP3 mannosyltransferase /// similar to nuclear cap binding protein subunit 2                                                                  | RGD1560600_predicted<br>LOC684506 /// LOC689116  | 3.16±0.32  |
| similar to snRNP core protein SMX5                                                                                                                        | LOC684148                                        | 0.86±0.4   |
| similar to solute carrier family 25 (mitochondrial carrier, Aralar), member 12 (predicted)                                                                | RGD1561141_predicted                             | 0.97±0.35  |
| Similar to solute carrier family 30 (zinc transporter), member 9                                                                                          | LOC498358                                        | 2.85±0.43  |
| Similar to Solute carrier family 35, member E3 (predicted)                                                                                                | RGD1564876_predicted                             | 1.21±0.38  |
| similar to Solute carrier family 6 (neurotransmitter transporter), member 20 (predicted)                                                                  | RGD1566368_predicted                             | 15.25±1.48 |
| similar to sorbin and SH3 domain containing 1 isoform 3                                                                                                   | LOC678826                                        | 4.33±0.89  |
| similar to sorting nexin 3                                                                                                                                | LOC684097                                        | 25.33±1.52 |
| similar to Sorting nexin-9                                                                                                                                | LOC683687                                        | 11.15±0.87 |
| similar to SPBPJ4664.02 (predicted) /// RGD1562079 (predicted)                                                                                            | RGD1559845_predicted ///<br>RGD1562079_predicted | 5.39±0.31  |
| similar to Sperm 1 POU-domain transcription factor (SPRM-1) (predicted)                                                                                   | RGD1305526_predicted                             | 1±0.22     |
| similar to spermatogenesis associated 5-like 1                                                                                                            | LOC691729                                        | 0.33±0.14  |
| similar to sphingomyelin phosphodiesterase 3, neutral membrane (predicted) /// similar to spermatogenesis and centriole associated 1                      | LOC686589 ///                                    | 0.39±0.04  |
| similar to spindlin                                                                                                                                       | RGD1565316_predicted                             | 4.41±0.47  |
| similar to spinster-like protein                                                                                                                          | LOC682571                                        | 2.64±0.39  |
| similar to SPla/Ryanodine receptor SPRY (1J970) (predicted)                                                                                               | RGD1305613                                       | 1.79±0.21  |
| similar to Splicing factor U2AF 35 kDa subunit (U2 auxiliary factor 35 kDa subunit) (U2 snRNP auxiliary factor small subunit)                             | LOC687575                                        | 1.26±0.26  |
| similar to splicing factor, arginine/serine-rich 1 (ASF/SF2) /// splicing factor, arginine/serine-rich 1                                                  | LOC688114 /// Sfrs1                              | 5.44±0.65  |
| Similar to splicing factor, arginine/serine-rich 2, interacting protein                                                                                   | LOC312030                                        | 3.15±0.33  |
| Similar to step II splicing factor SLU7; DNA segment, Chr 11, ERATO Doi 730, expressed; DNA segment, Chr 3, Brigham & Womens Genetics 0878 expressed      | LOC303057                                        | 2.34±0.36  |
| similar to step II splicing factor SLU7; DNA segment, Chr 11, ERATO Doi 730, expressed; DNA segment, Chr 3, Brigham & Womens Genetics 0878 expressed      | LOC303057 /// Slu7                               | 0.78±0.15  |
| Similar to Sterile alpha motif domain containing 10 (predicted)                                                                                           | RGD1563203_predicted                             | 0.53±0.08  |
| similar to stromal membrane-associated protein 1                                                                                                          | LOC684800                                        | 4.36±0.36  |
| similar to SUMO/sentrin specific protease 2                                                                                                               | LOC295194                                        | 1.02±0.09  |
| similar to SUMO/sentrin specific protease 5                                                                                                               | LOC686286                                        | 0.76±0.19  |
| similar to SUMO/sentrin specific protease 5 (predicted) /// similar to SUMO/sentrin specific protease 5                                                   | LOC686286 ///                                    | 0.32±0.05  |
| similar to suppressor of hairy wing homolog 4 isoform 1 (predicted)                                                                                       | RGD1564247_predicted                             | 0.71±0.16  |
| similar to Suppressor of S. cerevisiae gcr2 (predicted)                                                                                                   | RGD1560796_predicted                             | 0.86±0.08  |
| similar to SWI                                                                                                                                            | RGD1565023_predicted<br>LOC684513 /// LOC685179  | 1.44±0.22  |
| similar to T03G11.6                                                                                                                                       | LOC689540                                        | 11.86±0.23 |
| similar to TAF11 RNA polymerase II, TATA box binding protein (TBP)-associated factor (predicted)                                                          | RGD1562272_predicted                             | 0.83±0.11  |
| similar to talin 2 (predicted)                                                                                                                            | RGD1565416_predicted                             | 0.57±0.11  |
| Similar to TBP-associated factor 172 (TAF-172) (TAF(II)170) (predicted)                                                                                   | RGD1564130_predicted                             | 1.7±0.41   |
| similar to TBP-associated factor 4                                                                                                                        | LOC682097                                        | 0.79±0.26  |
| similar to testhymen (predicted)                                                                                                                          | RGD1563612_predicted                             | 0.33±0.27  |
| similar to THO complex subunit 4 (Tho4) (RNA and export factor binding protein 1) (REF1-I) (Ally of AML-1 and LEF-1) (Aly/REF)                            | LOC688305                                        | 1.29±0.3   |
| similar to thymus atrophy-related protein (predicted)                                                                                                     | RGD1304607_predicted                             | 0.76±0.12  |
| Similar to TICAM-1                                                                                                                                        | LOC363328                                        | 0.28±0.17  |
| similar to topoisomerase (DNA) II beta                                                                                                                    | LOC361100                                        | 2.67±0.19  |
| similar to TR4 orphan receptor associated protein TRA16                                                                                                   | LOC361128                                        | 1.36±0.08  |
| Similar to Traf2 and NCK interacting kinase, splice variant 4 (predicted)                                                                                 | RGD1561817_predicted                             | 0.54±0.09  |
| similar to transcription factor                                                                                                                           | MGC112830                                        | 2.5±0.06   |
| similar to Transcription factor 7-like 2 (HMG box transcription factor 4) (T-cell-specific transcription factor 4) (TCF-4) (hTCF-4)                       | LOC683733                                        | 0.7±0.28   |
| similar to Transcription initiation factor TFIID subunit 12 (Transcription initiation factor TFIID 20 kDa subunits) (TAFII-20) (TAFII20)                  | LOC682902                                        | 0.41±0.17  |
| similar to translocase of inner mitochondrial membrane 50 homolog                                                                                         | LOC687295                                        | 1.47±0.07  |
| similar to translocase of the inner mitochondrial membrane 14 isoform a                                                                                   | LOC683663                                        | 25.52±1.53 |
| Similar to transmembrane 6 superfamily member 2                                                                                                           | LOC689029                                        | 1.33±0.09  |
| similar to transmembrane protein 41a                                                                                                                      | LOC681708                                        | 5±0.39     |
| similar to TRS85 homolog (predicted)                                                                                                                      | RGD1309102_predicted                             | 2.15±0.29  |
| Similar to TSC22 domain family protein 2 (TSC22-related-inducible leucine zipper protein 4)                                                               | LOC499624                                        | 0.46±0.29  |
| similar to tyrosine kinase-associated leucine zipper protein LAZipII (predicted)                                                                          | RGD1565584_predicted                             | 0.83±0.16  |
| similar to U5 snRNP-specific protein (Prp8-binding) (predicted)                                                                                           | RGD1309198_predicted                             | 0.52±0.22  |
| similar to ubiquinol-cytochrome c reductase complex 7.2kDa protein isoform b                                                                              | LOC685322                                        | 48.89±4.43 |
| similar to Ubiquitin carboxyl-terminal hydrolase 21 (Ubiquitin thiolesterase 21) (Ubiquitin-specific processing protease 21) (Deubiquitinating enzyme 21) | LOC678925 /// LOC688466                          | 0.67±0.1   |
| similar to ubiquitin protein ligase E3 component n-recogin 2                                                                                              | LOC363188                                        | 1.33±0.08  |
| similar to ubiquitin protein ligase E3B                                                                                                                   | LOC687633                                        | 2.16±0.42  |
| similar to ubiquitin specific protease 34                                                                                                                 | LOC360990                                        | 2.04±0.14  |
| similar to Ubiquitin-associated protein 2-like                                                                                                            | LOC497952                                        | 1.51±0.07  |
| similar to ubiquitin-conjugating enzyme E2R 2                                                                                                             | LOC689226                                        | 5.76±1.08  |
| similar to ubiquitin-protein ligase E3-alpha (predicted)                                                                                                  | RGD1562326_predicted                             | 1.99±0.46  |
| similar to UPF0197 protein C11orf10 homolog (predicted)                                                                                                   | RGD1560328_predicted                             | 7.41±0.28  |
| similar to UPF0308 protein C9orf21                                                                                                                        | LOC498685                                        | 0.43±0.08  |
| similar to vacuolar protein sorting 13C protein (predicted)                                                                                               | RGD1560364_predicted                             | 2.74±0.07  |
| Similar to Vacuolar protein sorting 26 homolog (VPS26 protein homolog)                                                                                    | LOC300472                                        | 2.94±0.71  |
| similar to vacuolar protein sorting 37D                                                                                                                   | LOC687208                                        | 0.66±0.46  |

|                                                                                                      |                      |            |
|------------------------------------------------------------------------------------------------------|----------------------|------------|
| similar to vesicle transport through interaction with t-SNAREs 1B homolog (predicted)                | RGD1560475_predicted | 0.61±0.19  |
| similar to Vps41 protein (predicted)                                                                 | RGD1560511_predicted | 8.26±0.71  |
| similar to WAC (predicted)                                                                           | RGD1562407_predicted | 1.67±0.2   |
| similar to WD repeat domain 11 protein (predicted)                                                   | RGD1564964_predicted | 0.81±0.17  |
| similar to WD repeat domain 74 /// WD repeat domain 74                                               | LOC686449 /// Wdr74  | 0.86±0.3   |
| similar to Wdr8 protein                                                                              | LOC366515            | 0.67±0.17  |
| Similar to XPA binding protein 1                                                                     | LOC688393            | 0.86±0.09  |
| similar to yippee-like 3 (predicted)                                                                 | RGD1564579_predicted | 0.94±0.18  |
| similar to YY1-associated factor 2 /// YY1 associated factor 2                                       | LOC681599 /// Yaf2   | 0.53±0.09  |
| similar to Zinc finger CCCH-type domain containing protein 6                                         | LOC678741            | 1.07±0.35  |
| Similar to Zinc finger CCHC domain-containing protein 6                                              | LOC501515            | 0.99±0.16  |
| similar to zinc finger like protein 1                                                                | LOC684755            | 0.46±0.23  |
| similar to Zinc finger protein 133                                                                   | LOC499900            | 0.5±0.11   |
| similar to zinc finger protein 146                                                                   | LOC687516            | 0.68±0.26  |
| similar to zinc finger protein 277 isoform 1                                                         | LOC298977            | 2.9±0.31   |
| similar to zinc finger protein 322a                                                                  | LOC684943            | 0.21±0.08  |
| similar to Zinc finger protein 326 (Zinc finger protein-associated with nuclear matrix of 75 kDa)    | LOC682914            | 3.44±0.37  |
| similar to zinc finger protein 422, related sequence 1                                               | LOC314600            | 1.25±0.12  |
| similar to zinc finger protein 426 (predicted)                                                       | RGD1564241_predicted | 0.36±0.05  |
| similar to zinc finger protein 455                                                                   | LOC682834            | 0.5±0.06   |
| Similar to zinc finger protein 609 (predicted)                                                       | RGD1561651_predicted | 0.49±0.12  |
| similar to Zinc finger protein 62 homolog (Zfp-62) (ZT3) (predicted)                                 | RGD1560191_predicted | 0.44±0.18  |
| similar to zinc finger protein 639                                                                   | LOC683504            | 0.84±0.12  |
| similar to zinc finger protein 709                                                                   | LOC362845            | 0.23±0.07  |
| Similar to zinc finger protein 748 isoform 2                                                         | LOC680222            | 0.32±0.05  |
| similar to zinc finger protein 75 (predicted)                                                        | RGD1565419_predicted | 0.69±0.11  |
| similar to zinc finger protein 84 (HPF2)                                                             | LOC691170            | 0.53±0.11  |
| similar to Zinc finger protein RP-8 CG3260-PA /// programmed cell death 2-like                       | LOC687670 /// Pcdc2l | 1.23±0.09  |
| similar to zinc finger, matrix type 2                                                                | LOC679898            | 1.91±0.11  |
| similar to zinc finger, RAN-binding domain containing 3 (predicted)                                  | RGD1564952_predicted | 0.3±0.07   |
| similar to zinc finger, ZZ domain containing 3                                                       | LOC310958            | 1.65±0.36  |
| Sin3A associated protein                                                                             | Sap130               | 1.64±0.22  |
| Sin3-associated polypeptide 18                                                                       | Sap18                | 10.25±0.11 |
| single immunoglobulin and toll-interleukin 1 receptor (TIR) domain                                   | Sigirr               | 3.02±0.38  |
| single stranded DNA binding protein 3                                                                | Ssbp3                | 0.68±0.06  |
| single-stranded DNA binding protein 1                                                                | Ssbp1                | 2.52±0.41  |
| single-stranded DNA binding protein 2                                                                | Ssbp2                | 1.47±0.39  |
| sirtuin (silent mating type information regulation 2 homolog) 2 (S. cerevisiae)                      | Sirt2                | 4.37±0.47  |
| sirtuin 3 (silent mating type information regulation 2, homolog) 3 (S. cerevisiae) (predicted)       | Sirt3_predicted      | 2.79±0.06  |
| sirtuin 4 (silent mating type information regulation 2 homolog) 4 (S. cerevisiae)                    | Sirt4                | 0.32±0.08  |
| sirtuin 5 (silent mating type information regulation 2 homolog) 5 (S. cerevisiae)                    | Sirt5                | 1.61±0.22  |
| sirtuin 6 (silent mating type information regulation 2, homolog) 6 (S. cerevisiae)                   | Sirt6                | 0.57±0.06  |
| sirtuin 7 (silent mating type information regulation 2, homolog) 7 (S. cerevisiae) (predicted)       | Sirt7_predicted      | 1.58±0.15  |
| six transmembrane epithelial antigen of the prostate 1 (predicted)                                   | Steap1_predicted     | 4.79±0.71  |
| six transmembrane epithelial antigen of the prostate 2                                               | Steap2               | 22.22±1.41 |
| Sjogren syndrome antigen B                                                                           | Ssb                  | 4.58±0.35  |
| Sjogren's syndrome nuclear autoantigen 1 (predicted)                                                 | Ssna1_predicted      | 2.78±0.38  |
| skeletal muscle and kidney enriched inositol phosphatase                                             | Skip                 | 1.11±0.12  |
| SLAIN motif family, member 2                                                                         | Slain2               | 1.18±0.31  |
| slingshot homolog 1 (Drosophila)                                                                     | Ssh1                 | 0.24±0.14  |
| slingshot homolog 3 (Drosophila)                                                                     | Ssh3                 | 0.68±0.1   |
| slit homolog 2 (Drosophila)                                                                          | Slit2                | 1.47±0.2   |
| Smad nuclear interacting protein 1                                                                   | Snip1                | 1.33±0.02  |
| SMAD specific E3 ubiquitin protein ligase 2 (predicted)                                              | Smurf2_predicted     | 1.08±0.3   |
| small cell adhesion glycoprotein                                                                     | Smaggp               | 4.9±0.37   |
| small EDRK-rich factor 2                                                                             | Serf2                | 20.28±3.31 |
| small glutamine-rich tetratricopeptide repeat (TPR)-containing, alpha                                | Sqta                 | 4.73±0.49  |
| small inducible cytokine subfamily E, member 1                                                       | Scye1                | 2.11±0.29  |
| small nuclear ribonucleoprotein D1 (predicted)                                                       | Snrpd1_predicted     | 0.4±0.02   |
| small nuclear ribonucleoprotein D2 /// similar to small nuclear ribonucleoprotein D2                 | LOC686737 /// Snrpd2 | 3.06±1.05  |
| small nuclear ribonucleoprotein E                                                                    | Snrpe                | 10.26±0.68 |
| small nuclear ribonucleoprotein N /// SNRPN upstream reading frame                                   | Snrpn /// Snurf      | 0.44±0.19  |
| small nuclear ribonucleoprotein polypeptide A                                                        | Snrpa                | 0.45±0     |
| small nuclear ribonucleoprotein polypeptide F                                                        | Snrpf                | 3.05±0.24  |
| small nuclear ribonucleoprotein polypeptides B and B1                                                | Snrpb                | 8.72±0.33  |
| small nuclear RNA activating complex, polypeptide 1 (predicted)                                      | Snapc1_predicted     | 0.21±0.03  |
| small nuclear RNA activating complex, polypeptide 2                                                  | Snapc2               | 0.28±0.09  |
| small nuclear RNA activating complex, polypeptide 3                                                  | Snapc3               | 0.23±0.21  |
| small nuclear RNA activating complex, polypeptide 5                                                  | Snapc5               | 1.28±0.39  |
| small nucleolar RNA host gene (non-protein coding) 8                                                 | Snhg8                | 0.72±0.2   |
| SMC6 structural maintenance of chromosomes 6-like 1 (yeast) (predicted)                              | Smc6l1_predicted     | 1.54±0.12  |
| SMEK homolog 1, suppressor of mek1 (Dictyostelium)                                                   | Smek1                | 2.95±0.45  |
| SMEK homolog 2, suppressor of mek1 (Dictyostelium)                                                   | Smek2                | 2.79±0.44  |
| Smg-6 homolog, nonsense mediated mRNA decay factor (C. elegans) /// similar to KIAA0732 protein      | RGD1309609 /// Smg6  | 0.47±0.1   |
| Smith-Magenis syndrome chromosome region, candidate 7-like                                           | Smcr7l               | 0.54±0.12  |
| smoothelin-like 2                                                                                    | Smtnl2               | 5.59±0.32  |
| smoothened homolog (Drosophila)                                                                      | Smo                  | 0.3±0.03   |
| SMT3 suppressor of mif two 3 homolog 1 (yeast)                                                       | Sumo1                | 6.21±0.49  |
| SMT3 suppressor of mif two 3 homolog 2 (yeast) /// similar to SMT3 suppressor of mif two 3 homolog 2 | LOC690244 /// Sumo2  | 7.9±0.17   |
| SMT3 suppressor of mif two 3 homolog 3 (S. cerevisiae)                                               | Sumo3                | 6.61±0.99  |
| smu-1 suppressor of mec-8 and unc-52 homolog (C. elegans)                                            | Smu1                 | 2.83±0.29  |
| SNAP-associated protein                                                                              | Snapap               | 3.58±0.37  |
| SNF1-like kinase 2 (predicted)                                                                       | Snf1lk2_predicted    | 5.67±0.65  |
| SNF2 histone linker PHD RING helicase (predicted)                                                    | Shprh_predicted      | 0.86±0.06  |
| Snf2-related CREBBP activator protein                                                                | Srcap                | 0.32±0.05  |
| SNF8, ESCRT-II complex subunit, homolog (S. cerevisiae)                                              | Snf8                 | 2.66±0.23  |
| sno, strawberry notch homolog 1 (Drosophila)                                                         | Sbno1                | 3.32±0.37  |



|                                                                                                         |                    |            |
|---------------------------------------------------------------------------------------------------------|--------------------|------------|
| snurportin 1                                                                                            | Snupn              | 0.27±0.12  |
| soc-2 (suppressor of clear) homolog (C. elegans)                                                        | Shoc2              | 0.47±0.05  |
| sodium channel and clathrin linker 1                                                                    | Sclt1              | 0.4±0.27   |
| sodium channel modifier 1 (predicted)                                                                   | Scnm1_predicted    | 6.15±1.91  |
| solute carrier family 1 (neuronal/epithelial high affinity glutamate transporter, system Xag), member 1 | Slc1a1             | 15.39±2.87 |
| solute carrier family 10 (sodium/bile acid cotransporter family), member 1                              | Slc10a1            | 0.28±0.09  |
| solute carrier family 10 (sodium/bile acid cotransporter family), member 3                              | Slc10a3            | 0.3±0.09   |
| solute carrier family 10, member 2                                                                      | Slc10a2            | 1.69±0.01  |
| solute carrier family 11 (proton-coupled divalent metal ion transporters), member 2                     | Slc11a2            | 8.34±1.6   |
| solute carrier family 12 (potassium/chloride transporters), member 8                                    | Slc12a8            | 7±1.52     |
| solute carrier family 12 (potassium/chloride transporters), member 9                                    | Slc12a9            | 0.57±0.06  |
| solute carrier family 12 (sodium/potassium/chloride transporters), member 2                             | Slc12a2            | 1.95±0.11  |
| solute carrier family 12, member 6                                                                      | Slc12a6            | 4.07±0.85  |
| solute carrier family 12, member 7                                                                      | Slc12a7            | 2.94±0.29  |
| solute carrier family 13 (sodium/sulfate symporters), member 1                                          | Slc13a1            | 24.03±3.58 |
| solute carrier family 13 (sodium-dependent dicarboxylate transporter), member 2                         | Slc13a2            | 9.67±1.37  |
| solute carrier family 13 (sodium-dependent dicarboxylate transporter), member 3                         | Slc13a3            | 43.0±5.03  |
| solute carrier family 15 (oligopeptide transporter), member 1                                           | Slc15a1            | 3.54±0.14  |
| solute carrier family 15, member 4                                                                      | Slc15a4            | 1.24±0.23  |
| solute carrier family 16 (monocarboxylic acid transporters), member 1                                   | Slc16a1            | 18.81±2.84 |
| solute carrier family 16 (monocarboxylic acid transporters), member 10                                  | Slc16a10           | 2.29±0.15  |
| solute carrier family 16 (monocarboxylic acid transporters), member 13                                  | Slc16a13           | 6.23±0.41  |
| solute carrier family 16 (monocarboxylic acid transporters), member 6                                   | Slc16a6            | 7.83±0.65  |
| solute carrier family 17 (anion/sugar transporter), member 5                                            | Slc17a5            | 8.02±1.49  |
| solute carrier family 17 (sodium phosphate), member 1                                                   | Slc17a1            | 13.3±0.94  |
| solute carrier family 17 (sodium phosphate), member 2 (predicted)                                       | Slc17a2_predicted  | 3.32±0.36  |
| solute carrier family 17 (sodium phosphate), member 3                                                   | Slc17a3            | 7.55±1.49  |
| solute carrier family 17 (sodium phosphate), member 4                                                   | Slc17a4            | 3.02±0.26  |
| solute carrier family 19 (sodium/hydrogen exchanger), member 1                                          | Slc19a1            | 6.55±1.33  |
| solute carrier family 19 (thiamine transporter), member 2                                               | Slc19a2            | 0.63±0.38  |
| solute carrier family 2 (facilitated glucose transporter), member 2                                     | Slc2a2             | 26.18±2.14 |
| solute carrier family 2 (facilitated glucose transporter), member 9                                     | Slc2a9             | 0.5±0.06   |
| solute carrier family 2, (facilitated glucose transporter) member 8                                     | Slc2a8             | 0.66±0.08  |
| solute carrier family 20 (phosphate transporter), member 1                                              | Slc20a1            | 2.29±0.33  |
| solute carrier family 20, member 2                                                                      | Slc20a2            | 0.74±0.14  |
| solute carrier family 22 (organic anion transporter), member 6                                          | Slc22a6            | 33.58±3.92 |
| solute carrier family 22 (organic anion transporter), member 8                                          | Slc22a8            | 46.31±2.28 |
| solute carrier family 22 (organic anion/cation transporter), member 12                                  | Slc22a12           | 8.5±1.19   |
| solute carrier family 22 (organic anion/cation transporter), member 9                                   | Slc22a9            | 24.56±3.26 |
| solute carrier family 22 (organic cation transporter), member 1                                         | Slc22a1            | 24.22±1.7  |
| solute carrier family 22 (organic cation transporter), member 15 (predicted)                            | Slc22a15_predicted | 0.75±0.13  |
| solute carrier family 22 (organic cation transporter), member 17                                        | Slc22a17           | 1.23±0.19  |
| solute carrier family 22 (organic cation transporter), member 18                                        | Slc22a18           | 28.05±2.82 |
| solute carrier family 22 (organic cation transporter), member 4                                         | Slc22a4            | 2.64±0.39  |
| solute carrier family 22 (organic cation transporter), member 5                                         | Slc22a5            | 24.84±3.12 |
| solute carrier family 22, member 23                                                                     | Slc22a23           | 0.59±0.17  |
| solute carrier family 23 (nucleobase transporters), member 1                                            | Slc23a1            | 2.07±0.36  |
| solute carrier family 25 (mitochondrial carnitine/acylcarnitine translocase), member 20                 | Slc25a20           | 3.41±0.37  |
| solute carrier family 25 (mitochondrial carrier, adenine nucleotide translocator), member 13            | Slc25a13           | 24.42±2.08 |
| solute carrier family 25 (mitochondrial carrier, brain), member 14                                      | Slc25a14           | 0.28±0.13  |
| solute carrier family 25 (mitochondrial carrier, citrate transporter), member 1                         | Slc25a1            | 7.17±0.82  |
| solute carrier family 25 (mitochondrial carrier, glutamate), member 22                                  | Slc25a22           | 1.3±0.18   |
| solute carrier family 25 (mitochondrial carrier, palmitoylcarnitine transporter), member 29             | Slc25a29           | 1.04±0.06  |
| solute carrier family 25 (mitochondrial carrier, peroxisomal membrane protein), member 17 (predicted)   | Slc25a17_predicted | 4.34±0.53  |
| solute carrier family 25 (mitochondrial carrier, phosphate carrier), member 25                          | Slc25a25           | 0.7±0.32   |
| solute carrier family 25 (mitochondrial carrier, phosphate carrier), member 3                           | Slc25a3            | 51.28±3.76 |
| solute carrier family 25 (mitochondrial carrier; adenine nucleotide translocator), member 4             | Slc25a4            | 16.99±2.91 |
| solute carrier family 25 (mitochondrial carrier; adenine nucleotide translocator), member 5             | Slc25a5            | 57.01±2.74 |
| solute carrier family 25 (mitochondrial carrier; dicarboxylate transporter), member 10                  | Slc25a10           | 14.41±1.94 |
| Solute carrier family 25 (mitochondrial carrier; ornithine transporter) member 15                       | Slc25a15           | 6.44±0.44  |
| solute carrier family 25 (mitochondrial carrier; oxoglutarate carrier), member 11                       | Slc25a11           | 15.79±0.47 |
| solute carrier family 25 (mitochondrial carrier; phosphate carrier), member 23                          | Slc25a23           | 6.69±1.1   |
| solute carrier family 25, member 28                                                                     | Slc25a28           | 1.78±0.46  |
| Solute carrier family 25, member 30                                                                     | Slc25a30           | 7.11±0.9   |
| solute carrier family 25, member 36                                                                     | Slc25a36           | 7.78±0.48  |
| solute carrier family 25, member 37                                                                     | Slc25a37           | 0.69±0.27  |
| solute carrier family 25, member 38                                                                     | Slc25a38           | 1.2±0.07   |
| solute carrier family 25, member 39                                                                     | Slc25a39           | 18.55±2.28 |
| solute carrier family 25, member 44                                                                     | Slc25a44           | 1.6±0.08   |
| solute carrier family 25, member 46                                                                     | Slc25a46           | 5.63±1.1   |
| solute carrier family 26 (sulfate transporter), member 1                                                | Slc26a1            | 17.3±1.24  |
| solute carrier family 27 (fatty acid transporter), member 1                                             | Slc27a1            | 1.2±0.12   |
| solute carrier family 27 (fatty acid transporter), member 2                                             | Slc27a2            | 46.06±4.43 |
| solute carrier family 27 (fatty acid transporter), member 4                                             | Slc27a4            | 1.33±0.19  |
| solute carrier family 27 (fatty acid transporter), member 5                                             | Slc27a5            | 0.72±0.05  |
| solute carrier family 28 (sodium-coupled nucleoside transporter), member 1                              | Slc28a1            | 1.53±0.21  |
| solute carrier family 29 (nucleoside transporters), member 2                                            | Slc29a2            | 0.2±0.06   |
| solute carrier family 29 (nucleoside transporters), member 3                                            | Slc29a3            | 10.79±1.49 |
| solute carrier family 3 (activators of dibasic and neutral amino acid transport), member 2              | Slc3a2             | 37.93±1.59 |
| solute carrier family 3, member 1                                                                       | Slc3a1             | 47.78±4.89 |
| solute carrier family 30 (zinc transporter), member 1                                                   | Slc30a1            | 0.3±0.18   |
| solute carrier family 30 (zinc transporter), member 2                                                   | Slc30a2            | 4.15±0.71  |
| solute carrier family 30 (zinc transporter), member 4                                                   | Slc30a4            | 4.38±0.21  |
| solute carrier family 30 (zinc transporter), member 5 (predicted)                                       | Slc30a5_predicted  | 2.3±0.46   |
| solute carrier family 30 (zinc transporter), member 6 (predicted)                                       | Slc30a6_predicted  | 1.54±0.29  |
| solute carrier family 30 (zinc transporter), member 7                                                   | Slc30a7            | 0.4±0.12   |
| solute carrier family 30 (zinc transporter), member 9                                                   | Slc30a9            | 0.99±0.13  |

|                                                                                                                  |                    |            |
|------------------------------------------------------------------------------------------------------------------|--------------------|------------|
| solute carrier family 31 (copper transporters), member 1                                                         | Slc31a1            | 7.99±0.59  |
| solute carrier family 31, member 2                                                                               | Slc31a2            | 1.22±0.1   |
| solute carrier family 33 (acetyl-CoA transporter), member 1                                                      | Slc33a1            | 6.84±0.53  |
| solute carrier family 34 (sodium phosphate), member 1                                                            | Slc34a1            | 54.47±2.06 |
| solute carrier family 34 (sodium phosphate), member 3                                                            | Slc34a3            | 31.33±2.82 |
| solute carrier family 35 (CMP-sialic acid transporter), member 1 (predicted)                                     | Slc35a1_predicted  | 12.17±0.99 |
| Solute carrier family 35 (UDP-glucuronic acid/UDP-N-acetylgalactosamine dual transporter), member D1 (predicted) | Slc35d1_predicted  | 2.93±0.44  |
| solute carrier family 35 (UDP-N-acetylglucosamine (UDP-GlcNAc) transporter), member 3                            | Slc35a3            | 0.73±0.12  |
| solute carrier family 35, member A4                                                                              | Slc35a4            | 1.32±0.3   |
| solute carrier family 35, member A5                                                                              | Slc35a5            | 0.64±0.04  |
| solute carrier family 35, member B1                                                                              | Slc35b1            | 6.71±0.88  |
| solute carrier family 35, member B3 (predicted)                                                                  | Slc35b3_predicted  | 2±0.81     |
| solute carrier family 35, member B4 (predicted)                                                                  | Slc35b4_predicted  | 2.75±0.51  |
| solute carrier family 35, member C1 (predicted)                                                                  | Slc35c1_predicted  | 2.13±0.16  |
| solute carrier family 35, member C2                                                                              | Slc35c2            | 1.98±0.04  |
| solute carrier family 35, member E1                                                                              | Slc35e1            | 0.5±0.06   |
| solute carrier family 35, member E3                                                                              | Slc35e3            | 0.47±0.03  |
| solute carrier family 35, member F2 (predicted)                                                                  | Slc35f2_predicted  | 1.12±0.33  |
| solute carrier family 35, member F5 (predicted)                                                                  | Slc35f5_predicted  | 0.63±0.13  |
| solute carrier family 37 (glucose-6-phosphate transporter), member 4                                             | Slc37a4            | 41.99±2.71 |
| solute carrier family 38, member 10                                                                              | Slc38a10           | 2.05±0.23  |
| solute carrier family 38, member 2                                                                               | Slc38a2            | 1.6±0.58   |
| solute carrier family 38, member 6                                                                               | Slc38a6            | 0.94±0.25  |
| solute carrier family 38, member 7                                                                               | Slc38a7            | 1.09±0.08  |
| solute carrier family 39 (iron-regulated transporter), member 1                                                  | Slc40a1            | 4.16±0.27  |
| solute carrier family 39 (metal ion transporter), member 13                                                      | Slc39a13           | 1.53±0.11  |
| solute carrier family 39 (metal ion transporter), member 5 (predicted)                                           | Slc39a5_predicted  | 0.69±0.04  |
| solute carrier family 39 (metal ion transporter), member 8                                                       | Slc39a8            | 5.04±1.23  |
| solute carrier family 39 (zinc transporter), member 10 (predicted)                                               | Slc39a10_predicted | 2.04±0.28  |
| solute carrier family 39 (zinc transporter), member 14 (predicted)                                               | Slc39a14_predicted | 1.21±0.03  |
| solute carrier family 39 (zinc transporter), member 3                                                            | Slc39a3            | 1.19±0.26  |
| solute carrier family 4 (anion exchanger), member 1, adaptor protein (predicted)                                 | Slc4a1ap_predicted | 0.96±0.04  |
| solute carrier family 4 (anion exchanger), member 2                                                              | Slc4a2             | 2.18±0.14  |
| solute carrier family 4 (anion exchanger), member 4                                                              | Slc4a4             | 26.35±3.93 |
| solute carrier family 41, member 1 (predicted)                                                                   | Slc41a1_predicted  | 0.23±0.1   |
| solute carrier family 43, member 2 (predicted)                                                                   | Slc43a2_predicted  | 14.4±1.31  |
| solute carrier family 44, member 4                                                                               | Slc44a4            | 5.63±0.98  |
| solute carrier family 45, member 3 (predicted)                                                                   | Slc45a3_predicted  | 1.37±0.24  |
| solute carrier family 45, member 4                                                                               | Slc45a4            | 1.07±0.09  |
| solute carrier family 46, member 1                                                                               | Slc46a1            | 0.37±0.02  |
| solute carrier family 47, member 1                                                                               | Slc47a1            | 33.38±4.15 |
| solute carrier family 5 (sodium/glucose cotransporter), member 11                                                | Slc5a11            | 8.45±1.37  |
| solute carrier family 5 (sodium/glucose cotransporter), member 12                                                | Slc5a12            | 23.43±1.69 |
| solute carrier family 5 (sodium/glucose cotransporter), member 2                                                 | Slc5a2             | 34.46±3.46 |
| solute carrier family 5 (sodium-dependent vitamin transporter), member 6                                         | Slc5a6             | 1.59±0.56  |
| solute carrier family 6 (neurotransmitter transporter), member 18                                                | Slc6a18            | 1.31±1.19  |
| solute carrier family 6 (neurotransmitter transporter), member 20                                                | Slc6a20            | 1.5±0.26   |
| solute carrier family 6 (neurotransmitter transporter, creatine), member 8                                       | Slc6a8             | 31.37±3.68 |
| solute carrier family 6 (neurotransmitter transporter, GABA), member 13                                          | Slc6a13            | 3.92±0.14  |
| solute carrier family 6 (neurotransmitter transporter, taurine), member 6                                        | Slc6a6             | 1.05±0.14  |
| solute carrier family 7 (cationic amino acid transporter, y+ system), member 7                                   | Slc7a7             | 56.19±1.81 |
| solute carrier family 7 (cationic amino acid transporter, y+ system), member 8                                   | Slc7a8             | 10.65±1.2  |
| solute carrier family 7 (cationic amino acid transporter, y+ system), member 9                                   | Slc7a9             | 43.28±3.17 |
| solute carrier family 7, member 6 opposite strand                                                                | Slc7a6os           | 0.46±0.12  |
| solute carrier family 9 (sodium/hydrogen exchanger), isoform 6                                                   | Slc9a6             | 1.95±0.38  |
| solute carrier family 9 (sodium/hydrogen exchanger), member 1                                                    | Slc9a1             | 0.33±0.28  |
| solute carrier family 9 (sodium/hydrogen exchanger), member 3                                                    | Slc9a3             | 10.18±0.89 |
| solute carrier family 9 (sodium/hydrogen exchanger), member 3 regulator 1                                        | Slc9a3r1           | 19.1±2.42  |
| Son cell proliferation protein                                                                                   | Son                | 4.69±0.86  |
| Son of sevenless homolog 1 (Drosophila)                                                                          | Sos1               | 1.34±0.23  |
| sorbitol dehydrogenase                                                                                           | Sord               | 48.33±3    |
| sortilin-related receptor, LDLR class A repeats-containing                                                       | Sort1              | 1.17±1.35  |
| sortilin-related VPS10 domain containing receptor 2 (predicted)                                                  | Sorcs2_predicted   | 4.77±0.59  |
| sorting and assembly machinery component 50 homolog (S. cerevisiae)                                              | Samm50             | 12.48±1.78 |
| sorting nexin 1                                                                                                  | Snx1               | 3.63±0.69  |
| sorting nexin 11                                                                                                 | Snx11              | 0.86±0.3   |
| sorting nexin 12 (predicted)                                                                                     | Snx12_predicted    | 2.32±0.08  |
| sorting nexin 13 (predicted)                                                                                     | Snx13_predicted    | 2.11±0.38  |
| sorting nexin 14 (predicted)                                                                                     | Snx14_predicted    | 1.4±0.26   |
| sorting nexin 15                                                                                                 | Snx15              | 0.6±0.21   |
| sorting nexin 16                                                                                                 | Snx16              | 2.35±0.11  |
| sorting nexin 17                                                                                                 | Snx17              | 4.12±1.01  |
| sorting nexin 18                                                                                                 | Snx18              | 4.74±1.07  |
| sorting nexin 19 (predicted)                                                                                     | Snx19_predicted    | 1.22±0.39  |
| sorting nexin 2 (predicted)                                                                                      | Snx2_predicted     | 11.85±2.62 |
| sorting nexin 25                                                                                                 | Snx25              | 5.12±0.16  |
| sorting nexin 4 (predicted)                                                                                      | Snx4_predicted     | 1.77±0.14  |
| sorting nexin 5 (predicted)                                                                                      | Snx5_predicted     | 22.1±0.48  |
| sorting nexin 6 (predicted)                                                                                      | Snx6_predicted     | 9.41±0.9   |
| sorting nexin 7                                                                                                  | Snx7               | 2.98±1.23  |
| sorting nexin 8 (predicted)                                                                                      | Snx8_predicted     | 1.45±0.33  |
| sorting nexin family member 27                                                                                   | Snx27              | 2.24±0.27  |
| sorting nexin 24                                                                                                 | Snx24              | 1.37±0.16  |
| spastic paraplegia 20, spartin (Troyer syndrome) homolog (human)                                                 | Spq20              | 0.9±0.18   |
| spastic paraplegia 21 homolog (human)                                                                            | Spq21              | 6.35±0.82  |
| spastic paraplegia 3A homolog (human)                                                                            | Spq3a              | 0.33±0.02  |
| spastic paraplegia 7 homolog (human)                                                                             | Spq7               | 3.72±0.34  |

|                                                                                                               |                         |            |
|---------------------------------------------------------------------------------------------------------------|-------------------------|------------|
| spastin (predicted)                                                                                           | Spast_predicted         | 1.71±0.27  |
| SPC24, NDC80 kinetochore complex component, homolog (S. cerevisiae)                                           | Spc24                   | 0.46±0.18  |
| SPC25, NDC80 kinetochore complex component, homolog (S. cerevisiae)                                           | Spc25                   | 0.66±0.11  |
| SPECC1-like                                                                                                   | Specc11                 | 0.94±0.15  |
| special AT-rich sequence binding protein 1                                                                    | Satb1                   | 0.59±0.15  |
| speckle-type POZ protein                                                                                      | Spop                    | 1.04±0.04  |
| spectrin beta 2                                                                                               | Spnb2                   | 34.54±0.64 |
| sperm associated antigen 7 (predicted)                                                                        | Spag7_predicted         | 1.94±0.07  |
| sperm associated antigen 9 (predicted)                                                                        | Spag9_predicted         | 8.77±0.67  |
| sperm autoantigenic protein 17                                                                                | Spa17                   | 3.13±0.47  |
| sperm specific antigen 2 (predicted)                                                                          | Ssfa2_predicted         | 6.04±0.41  |
| spermatid perinuclear RNA binding protein                                                                     | Strbp                   | 1.32±0.2   |
| spermatogenesis associated 5 (predicted)                                                                      | Spata5_predicted        | 0.23±0.11  |
| spermatogenesis associated 6                                                                                  | Spata6                  | 0.71±0.21  |
| spermatogenesis associated 7                                                                                  | Spata7                  | 1.2±0.12   |
| spermatogenesis associated, serine-rich 2 (predicted)                                                         | Spats2_predicted        | 2.88±0.58  |
| spermidine synthase                                                                                           | Srm                     | 0.85±0.12  |
| spermidine/spermine N1-acetyl transferase 1                                                                   | Sat1                    | 6.28±1.86  |
| spermidine/spermine N1-acetyl transferase 2 (predicted)                                                       | Sat2_predicted          | 11.23±0.43 |
| spermine synthase                                                                                             | Sms                     | 2.49±0.19  |
| spermine synthase /// similar to spermine synthase                                                            | LOC683008 /// LOC690027 | 1.16±0.28  |
|                                                                                                               | /// Sms                 |            |
| S-phase kinase-associated protein 1A                                                                          | Skp1a                   | 33.12±1.87 |
| S-phase kinase-associated protein 2 (p45)                                                                     | Skp2                    | 0.25±0.12  |
| sphingomyelin phosphodiesterase 1, acid lysosomal                                                             | Smpd1                   | 9.03±0.42  |
| sphingomyelin phosphodiesterase 2, neutral                                                                    | Smpd2                   | 0.78±0.12  |
| sphingomyelin phosphodiesterase 4                                                                             | Smpd4                   | 0.87±0.01  |
| sphingomyelin phosphodiesterase, acid-like 3A                                                                 | Smpd3a                  | 3.46±0.09  |
| sphingomyelin synthase 1                                                                                      | Sgms1                   | 1.17±0.1   |
| sphingosine kinase 2                                                                                          | Sphk2                   | 1.3±0.52   |
| sphingosine phosphate lyase 1                                                                                 | Sgpl1                   | 0.32±0.01  |
| sphingosine-1-phosphate phosphatase 1                                                                         | Sgpp1                   | 13.13±1.4  |
| spindlin 1 /// similar to spindlin                                                                            | LOC682571 /// Spin1     | 1.5±0.19   |
| spindlin family, member 2                                                                                     | Spin2                   | 0.24±0.02  |
| spire homolog 1 (Drosophila) (predicted)                                                                      | Spire1_predicted        | 0.27±0.13  |
| splA/ryanodine receptor domain and SOCS box containing 2                                                      | Spsb2                   | 0.44±0.11  |
| splA/ryanodine receptor domain and SOCS box containing 3 (predicted)                                          | Spsb3_predicted         | 2.7±0.35   |
| splA/ryanodine receptor domain and SOCS box containing 4 (predicted)                                          | Spsb4_predicted         | 0.66±0.09  |
| splicing factor 1                                                                                             | Sf1                     | 3.32±0.64  |
| splicing factor 3a, subunit 1 (predicted)                                                                     | Sf3a1_predicted         | 0.42±0.1   |
| splicing factor 3a, subunit 2                                                                                 | Sf3a2                   | 1.23±0.19  |
| splicing factor 3a, subunit 3                                                                                 | Sf3a3                   | 0.97±0.25  |
| splicing factor 3b, subunit 1                                                                                 | Sf3b1                   | 11.25±1.11 |
| splicing factor 3b, subunit 2 (predicted)                                                                     | Sf3b2_predicted         | 2.21±0.26  |
| splicing factor 3b, subunit 3 (predicted)                                                                     | Sf3b3_predicted         | 1.72±0.15  |
| splicing factor 3b, subunit 4                                                                                 | Sf3b4                   | 2.47±0.05  |
| splicing factor 3b, subunit 5                                                                                 | Sf3b5                   | 4.41±0.76  |
| splicing factor 4                                                                                             | Sf4                     | 0.68±0.05  |
| splicing factor proline/glutamine rich (polypyrimidine tract binding protein associated)                      | Sfpq                    | 1.08±0.2   |
| splicing factor YT521-B                                                                                       | Yt521                   | 3.68±0.22  |
| splicing factor, arginine/serine rich 9                                                                       | Sfrs9                   | 1.47±0.34  |
| splicing factor, arginine/serine-rich 10 (transformer 2 homolog, Drosophila)                                  | Sfrs10                  | 11.25±1.27 |
| splicing factor, arginine/serine-rich 11                                                                      | Sfrs11                  | 3.15±0.41  |
| splicing factor, arginine/serine-rich 12                                                                      | Sfrs12                  | 0.93±0.15  |
| splicing factor, arginine/serine-rich 14 (predicted)                                                          | Sfrs14_predicted        | 0.31±0.06  |
| splicing factor, arginine/serine-rich 15                                                                      | Sfrs15                  | 0.69±0.17  |
| splicing factor, arginine/serine-rich 18                                                                      | Sfrs18                  | 2.27±0.7   |
| splicing factor, arginine/serine-rich 2 (SC-35)                                                               | Sfrs2                   | 8.79±1.02  |
| splicing factor, arginine/serine-rich 2, interacting protein                                                  | Sfrs2ip                 | 2.53±0.47  |
| splicing factor, arginine/serine-rich 3 (SRp20) (predicted)                                                   | Sfrs3_predicted         | 5.29±0.75  |
| splicing factor, arginine/serine-rich 5                                                                       | Sfrs5                   | 7.6±1.7    |
| splicing factor, arginine/serine-rich 6                                                                       | Sfrs6                   | 8.27±0.74  |
| splicing factor, arginine/serine-rich 8                                                                       | Sfrs8                   | 0.37±0.09  |
| split hand/foot malformation (ectrodactyly) type 1                                                            | Shfm1                   | 12.41±0.66 |
| sporulation protein, meiosis-specific, SPO11 homolog (S. cerevisiae) (predicted)                              | Spo11_predicted         | 0.79±0.17  |
| sprouty homolog 4 (Drosophila) (predicted)                                                                    | Spry4_predicted         | 0.24±0.3   |
| Sprouty-related, EVH1 domain containing 2                                                                     | Spred2                  | 0.46±0.34  |
| SPRY domain containing 4                                                                                      | Spryd4                  | 0.89±0.07  |
| squalene epoxidase                                                                                            | Sqle                    | 1.22±0.42  |
| squamous cell carcinoma antigen recognized by T-cells 1                                                       | Sart1                   | 1.64±0.35  |
| squamous cell carcinoma antigen recognized by T-cells 3 (predicted)                                           | Sart3_predicted         | 0.48±0.19  |
| src family associated phosphoprotein 2                                                                        | Skap2                   | 1.8±0.41   |
| Src homology 2 domain containing F                                                                            | Shf                     | 0.72±0.06  |
| Src homology 2 domain-containing transforming protein C1                                                      | Shc1                    | 0.75±0.14  |
| SREBF chaperone                                                                                               | Scap                    | 2.87±0.54  |
| SRR1 domain containing                                                                                        | Srrd                    | 0.3±0.15   |
| SR-related CTD-associated factor 1                                                                            | Scaf1                   | 0.44±0.15  |
| SRY-box containing gene 13                                                                                    | Sox13                   | 0.53±0.27  |
| SRY-box containing gene 6                                                                                     | Sox6                    | 0.29±0.04  |
| Ssu72 RNA polymerase II CTD phosphatase homolog (yeast)                                                       | Ssu72                   | 5.44±0.43  |
| ST3 beta-galactoside alpha-2,3-sialyltransferase 3                                                            | St3gal3                 | 0.66±0.07  |
| ST3 beta-galactoside alpha-2,3-sialyltransferase 5                                                            | St3gal5                 | 3.46±0.51  |
| ST3 beta-galactoside alpha-2,3-sialyltransferase 6                                                            | St3gal6                 | 5.83±0.28  |
| ST6 (alpha-N-acetyl-neuraminyl-2,3-beta-galactosyl-1,3)-N-acetylgalactosaminide alpha-2,6-sialyltransferase 3 | St6galnac3              | 7.14±0.32  |
| Stam binding protein                                                                                          | Stampb                  | 1.28±0.08  |
| stannin                                                                                                       | Snn                     | 1.04±0.17  |
| staphylococcal nuclease and tudor domain containing 1                                                         | Snd1                    | 1.2±0.24   |

|                                                                                   |                          |            |
|-----------------------------------------------------------------------------------|--------------------------|------------|
| STARD3 N-terminal like                                                            | Stard3nl                 | 1.46±0.32  |
| STAR-related lipid transfer (START) domain containing 4 (predicted)               | Stard4_predicted         | 1.68±0.07  |
| STAR-related lipid transfer (START) domain containing 5                           | Stard5                   | 0.71±0.08  |
| START domain containing 10                                                        | Stard10                  | 2.73±2.31  |
| START domain containing 3                                                         | Stard3                   | 1.74±0.55  |
| START domain containing 7 (predicted)                                             | Stard7_predicted         | 7.42±0.6   |
| START domain containing 8 (predicted)                                             | Stard8_predicted         | 1.72±0.46  |
| stathmin 1                                                                        | Stmn1                    | 23.12±0.92 |
| stauden RNA binding protein homolog 1 (Drosophila)                                | Stau1                    | 5.25±0.2   |
| stauden, RNA binding protein, homolog 2 (Drosophila)                              | Stau2                    | 2.1±0.3    |
| stem-loop binding protein                                                         | Slbp                     | 1.4±0.06   |
| Sterile alpha motif domain containing 4 (predicted)                               | Samd4_predicted          | 0.33±0.06  |
| sterile alpha motif domain containing 4B                                          | Samd4b                   | 0.66±0.23  |
| sterile alpha motif domain containing 8                                           | Samd8                    | 1.45±0.15  |
| steroid receptor RNA activator 1                                                  | Sra1                     | 5±0.99     |
| steroid sulfatase                                                                 | Sts                      | 0.48±0.15  |
| sterol carrier protein 2 /// podocan (predicted)                                  | Podn_predicted /// Scp2  | 22.75±0.87 |
| Sterol O-acyltransferase 1                                                        | Soat1                    | 1.13±0.06  |
| sterol regulatory element binding factor 1                                        | Sreb1                    | 1.31±0.25  |
| sterol regulatory element binding factor 2 (predicted)                            | Sreb2                    | 2.32±0.11  |
| sterol-C4-methyl oxidase-like                                                     | Sc4mol                   | 8.18±1.36  |
| sterol-C5-desaturase (fungal ERG3, delta-5-desaturase) homolog (S. cerevisiae)    | Sc5d                     | 5.97±1.86  |
| stimulated by retinoic acid gene 6                                                | Stra6                    | 8.59±0.17  |
| STIP1 homology and U-Box containing protein 1                                     | Stub1                    | 2.66±0.82  |
| stomatin (Epb7.2)-like 2                                                          | Stom2                    | 3.38±0.16  |
| strawberry notch homolog 2 (Drosophila)                                           | Sbno2                    | 0.6±0.07   |
| stress 70 protein chaperone, microsome-associated                                 | Stch                     | 1.09±0.03  |
| stress-associated endoplasmic reticulum protein 1                                 | Serp1                    | 14.44±0.26 |
| stress-induced phosphoprotein 1                                                   | Stip1                    | 4.8±0.45   |
| striatin, calmodulin binding protein                                              | Strn                     | 0.85±0.22  |
| striatin, calmodulin binding protein 3                                            | Strn3                    | 1.89±0.48  |
| striatin, calmodulin binding protein 4 (predicted)                                | Strn4_predicted          | 0.81±0.26  |
| stromal antigen 1 (predicted)                                                     | Stag1_predicted          | 1.66±0.3   |
| stromal antigen 2 (predicted)                                                     | Stag2_predicted          | 4.65±0.27  |
| stromal cell derived factor 2 (predicted)                                         | Sdf2_predicted           | 4.71±1.15  |
| stromal cell derived factor 4                                                     | Sdf4                     | 10.62±1.51 |
| stromal cell-derived factor 2-like 1 (predicted)                                  | Sdf2l1_predicted         | 1.23±0.36  |
| stromal interaction molecule 1 (predicted)                                        | Stim1_predicted          | 0.36±0.01  |
| stromal interaction molecule 2 (predicted)                                        | Stim2_predicted          | 0.58±0.16  |
| stromal membrane-associated GTPase-activating protein 2                           | Smap2                    | 1.08±0.23  |
| structural maintenance of chromosomes 3                                           | Smc3                     | 2.62±0.52  |
| structural maintenance of chromosomes 1A                                          | Smc1a                    | 1.73±0.41  |
| structural maintenance of chromosomes 2                                           | Smc2                     | 1.57±0.24  |
| structural maintenance of chromosomes 4                                           | Smc4                     | 0.52±0.19  |
| structural maintenance of chromosomes 5                                           | Smc5                     | 1.28±0.1   |
| structure specific recognition protein 1                                          | Ssrp1                    | 1.55±0.18  |
| STT3, subunit of the oligosaccharyltransferase complex, homolog A (S. cerevisiae) | Stt3a                    | 1.3±0.08   |
| SUB1 homolog (S. cerevisiae)                                                      | Sub1                     | 27.08±1.26 |
| succinate dehydrogenase complex, subunit A, flavoprotein (Fp)                     | Sdha                     | 39.33±3.17 |
| succinate dehydrogenase complex, subunit B, iron sulfur (Ip) (predicted)          | Sdhb_predicted           | 29.77±2.29 |
| succinate dehydrogenase complex, subunit C, integral membrane protein             | Sdhc                     | 35.7±1.91  |
| succinate dehydrogenase complex, subunit D, integral membrane protein             | Sdhd                     | 30.13±1.37 |
| succinate-CoA ligase, GDP-forming, alpha subunit                                  | Suclg1                   | 28.61±1.47 |
| succinate-Coenzyme A ligase, ADP-forming, beta subunit (predicted)                | Sucla2_predicted         | 22.66±2.71 |
| succinate-Coenzyme A ligase, GDP-forming, beta subunit                            | Suclg2                   | 30.37±4.67 |
| sulfatase 2                                                                       | Sulf2                    | 0.23±0.16  |
| sulfatase modifying factor 1 (predicted)                                          | Sumf1_predicted          | 2.46±0.48  |
| sulfatase modifying factor 2                                                      | Sumf2                    | 1.86±0.19  |
| sulfite oxidase                                                                   | Suox                     | 13.06±1.23 |
| sulfotransferase family 1A, phenol-preferring, member 1                           | Sult1a1                  | 0.89±0.38  |
| sulfotransferase family 1B, member 1                                              | Sult1b1                  | 16.67±1.68 |
| sulfotransferase family, cytosolic, 1C, member 2                                  | Sult1c2                  | 43.62±3.1  |
| sulfotransferase family, cytosolic, 1C, member 2a                                 | Sult1c2a                 | 63.09±0.58 |
| SUMO                                                                              | LOC686286 ///            | 0.61±0.12  |
|                                                                                   | RGD1564247_predicted /// |            |
| SUMO/sentrin specific peptidase 2                                                 | Senp5_predicted          |            |
| SUMO/sentrin specific peptidase 3                                                 | Senp2                    | 0.61±0.07  |
| SUMO/sentrin specific peptidase 6 (predicted)                                     | Senp3                    | 1.71±0.09  |
| SUMO1 activating enzyme subunit 1                                                 | Senp6_predicted          | 1.91±0.14  |
| SUMO1 activating enzyme subunit 2                                                 | Sae1                     | 2.6±0.17   |
| SUMO1/sentrin specific protease 7 (predicted)                                     | Sae2                     | 2.64±0.77  |
| superkiller viralicidic activity 2-like 2 (S. cerevisiae)                         | Senp7_predicted          | 0.7±0.03   |
| superoxide dismutase 1, soluble                                                   | Skiv2l2                  | 3.39±0.45  |
| superoxide dismutase 2, mitochondrial                                             | Sod1                     | 45.43±1.69 |
| superoxide dismutase 3, extracellular                                             | Sod2                     | 13.55±0.15 |
| supervillin (predicted)                                                           | Sod3                     | 34.3±3.46  |
| suppression of tumorigenicity 13                                                  | Svil_predicted           | 1.92±0.21  |
| suppression of tumorigenicity 7-like                                              | Stt13                    | 19.88±1.58 |
| suppressor of cytokine signaling 5                                                | Stt7                     | 0.74±0.02  |
| suppressor of cytokine signaling 6 (predicted)                                    | Socs5                    | 1.47±0.35  |
| suppressor of cytokine signaling 7 (predicted)                                    | Socs6_predicted          | 1.47±0.04  |
| suppressor of defective silencing 3 homolog (S. cerevisiae)                       | Socs7_predicted          | 0.33±0.04  |
| suppressor of IKK epsilon                                                         | Suds3                    | 2.34±0.49  |
| suppressor of Ty 16 homolog (S. cerevisiae) (predicted)                           | Sike                     | 0.57±0.17  |
| suppressor of Ty 4 homolog 1 (S. cerevisiae)                                      | Supt16h_predicted        | 1.88±0.41  |
| suppressor of Ty 5 homolog (S. cerevisiae)                                        | Supt4h1                  | 2.94±0.23  |
|                                                                                   | Supt5h                   | 4.19±0.52  |

|                                                                                                                              |                          |            |
|------------------------------------------------------------------------------------------------------------------------------|--------------------------|------------|
| suppressor of Ty 6 homolog (S. cerevisiae)                                                                                   | Supt6h                   | 2.35±0.49  |
| suppressor of Ty 7 (S. cerevisiae)-like                                                                                      | Supt7l                   | 0.84±0.19  |
| suppressor of var1, 3-like 1 (S. cerevisiae)                                                                                 | Supv3l1                  | 2.46±0.43  |
| suppressor of variegation 3-9 homolog 1 (Drosophila) (predicted)                                                             | Suv39h1_predicted        | 0.71±0.04  |
| suppressor of variegation 4-20 homolog 1 (Drosophila) (predicted)                                                            | Suv420h1_predicted       | 0.73±0.13  |
| suppressor of variegation 4-20 homolog 2 (Drosophila) (predicted)                                                            | Suv420h2_predicted       | 0.36±0.06  |
| surfeit 1                                                                                                                    | Surf1                    | 4.87±0.62  |
| surfeit 4                                                                                                                    | Surf4                    | 6.78±0.67  |
| surfeit gene 2                                                                                                               | Surf2                    | 4.33±0.58  |
| surfeit gene 6 (predicted)                                                                                                   | Surf6_predicted          | 0.7±0.13   |
| survival motor neuron 1                                                                                                      | Smn1                     | 0.86±0.06  |
| survival motor neuron domain containing 1                                                                                    | Smn1                     | 2.02±0.35  |
| survival of motor neuron protein interacting protein 1                                                                       | Sip1                     | 0.61±0.11  |
| sushi domain containing 2 (predicted)                                                                                        | Susd2_predicted          | 24.94±2.84 |
| sushi domain containing 3 (predicted)                                                                                        | Susd3_predicted          | 3.16±0.24  |
| sushi, nidogen and EGF-like domains 1 /// similar to CG2919-PA (predicted)                                                   | RGD1305604_predicted /// | 0.28±0.18  |
| SWA-70 protein                                                                                                               | Sned1                    |            |
| Swi/SNF related matrix associated, actin dependent regulator of chromatin, subfamily a-like 1 (predicted)                    | Swap70                   | 3.24±0.21  |
| SWI/SNF related, matrix associated, actin dependent regulator of chromatin, subfamily a, member 4                            | Smarcal1_predicted       | 0.39±0.1   |
| SWI/SNF related, matrix associated, actin dependent regulator of chromatin, subfamily a, member 5 (predicted)                | Smarca4                  | 1.05±0.09  |
| SWI/SNF related, matrix associated, actin dependent regulator of chromatin, subfamily b, member 1                            | Smarca5_predicted        | 1.7±0.12   |
| SWI/SNF related, matrix associated, actin dependent regulator of chromatin, subfamily b, member 1 (predicted)                | Smarcb1                  | 2.24±0.24  |
| SWI/SNF related, matrix associated, actin dependent regulator of chromatin, subfamily c, member 1 (predicted)                | Smarcc1_predicted        | 0.58±0.11  |
| SWI/SNF related, matrix associated, actin dependent regulator of chromatin, subfamily d, member 1 (predicted)                | Smarcd1_predicted        | 0.27±0.04  |
| SWI/SNF related, matrix associated, actin dependent regulator of chromatin, subfamily d, member 2                            | Smarcd2                  | 0.47±0.17  |
| SWI/SNF related, matrix associated, actin dependent regulator of chromatin, subfamily e, member 1                            | Smarce1                  | 3.24±0.38  |
| SWI/SNF-related, matrix-associated actin-dependent regulator of chromatin, subfamily a, containing DEAD/H box 1; (predicted) | Smarcd1_predicted        | 0.7±0.13   |
| SYF2 homolog, RNA splicing factor (S. cerevisiae)                                                                            | Syf2                     | 2.88±0.24  |
| symplekin                                                                                                                    | Sympk                    | 0.31±0.14  |
| synapse associated protein 1                                                                                                 | Syap1                    | 3.81±0.28  |
| synaptic vesicle glycoprotein 2b                                                                                             | Sv2b                     | 33.74±4    |
| synaptogyrin 1                                                                                                               | Syng1                    | 1±0.1      |
| synaptogyrin 2                                                                                                               | Syng2                    | 1.57±0.12  |
| synaptotagmin 1                                                                                                              | Synj1                    | 3.3±0.17   |
| synaptotagmin 2 binding protein                                                                                              | Synj2bp                  | 18.04±2.22 |
| synaptophysin-like 2                                                                                                         | Sypl2                    | 1.78±0.22  |
| Synaptophysin-like protein                                                                                                   | Sypl                     | 29.81±1.53 |
| synaptosomal-associated protein 23                                                                                           | Snap23                   | 7.08±0.9   |
| synaptosomal-associated protein 29                                                                                           | Snap29                   | 2.54±0.29  |
| Synaptotagmin binding, cytoplasmic RNA interacting protein                                                                   | Syncrip                  | 2.37±0.25  |
| Synaptotagmin III                                                                                                            | Syt3                     | 0.3±0.13   |
| syndecan 1                                                                                                                   | Sdc1                     | 2.45±0.29  |
| syndecan 2                                                                                                                   | Sdc2                     | 20.12±1.07 |
| syndecan 4                                                                                                                   | Sdc4                     | 21.21±1.7  |
| syndecan binding protein                                                                                                     | Sdcbp                    | 30.97±3.88 |
| synovial apoptosis inhibitor 1, synoviolin                                                                                   | Syvn1                    | 1.55±0.36  |
| synovial sarcoma translocation, Chromosome 18                                                                                | Ss18                     | 2.67±0.83  |
| synovial sarcoma, X breakpoint 2 interacting protein                                                                         | Ssx2ip                   | 0.56±0.18  |
| syntaxin 12                                                                                                                  | Stx12                    | 1.86±0.22  |
| syntaxin 16 (predicted)                                                                                                      | Stx16_predicted          | 0.98±0.27  |
| syntaxin 18                                                                                                                  | Stx18                    | 1.68±0.18  |
| syntaxin 3                                                                                                                   | Stx3                     | 0.45±0.1   |
| syntaxin 4A (placental)                                                                                                      | Stx4a                    | 2.63±0.18  |
| syntaxin 5a                                                                                                                  | Stx5a                    | 2.05±0.26  |
| syntaxin 6                                                                                                                   | Stx6                     | 1.01±0.05  |
| syntaxin 7                                                                                                                   | Stx7                     | 9.21±0.48  |
| syntaxin 8                                                                                                                   | Stx8                     | 1.28±0.3   |
| syntaxin binding protein 2                                                                                                   | Stxbp2                   | 2.07±0.25  |
| syntaxin binding protein 3                                                                                                   | Stxbp3                   | 4.9±0.45   |
| syntaxin binding protein 5 (tomosyn)                                                                                         | Stxbp5                   | 0.89±0.2   |
| syntrophin, acidic 1                                                                                                         | Snta1                    | 9.3±1.85   |
| TAF1 RNA polymerase II, TATA box binding protein (TBP)-associated factor (predicted)                                         | Taf1_predicted           | 0.52±0.22  |
| TAF11 RNA polymerase II, TATA box binding protein (TBP)-associated factor                                                    | Taf11                    | 3.71±0.22  |
| TAF13 RNA polymerase II, TATA box binding protein (TBP)-associated factor (predicted)                                        | Taf13_predicted          | 2.69±0.36  |
| TAF2 RNA polymerase II, TATA box binding protein (TBP)-associated factor                                                     | Taf2                     | 2.53±0.28  |
| TAF5 RNA polymerase II, TATA box binding protein (TBP)-associated factor (predicted)                                         | Taf5_predicted           | 0.2±0.07   |
| TAF5-like RNA polymerase II, p300/CBP-associated factor (PCAF)-associated factor                                             | Taf5l                    | 0.59±0.07  |
| TAF6 RNA polymerase II, TATA box binding protein (TBP)-associated factor                                                     | Taf6                     | 1.19±0.28  |
| TAF8 RNA polymerase II, TATA box binding protein (TBP)-associated factor                                                     | Taf8                     | 0.49±0.02  |
| TAF9 RNA polymerase II, TATA box binding protein (TBP)-associated factor                                                     | Taf9                     | 4.83±0.87  |
| TAF9 RNA polymerase II, TATA box binding protein (TBP)-associated factor pseudogene                                          | Taf9 /// Taf9_ps         | 1.8±0.02   |
| TAF9B RNA polymerase II, TATA box binding protein (TBP)-associated factor                                                    | Taf9b                    | 0.65±0.19  |
| tafazzin                                                                                                                     | Taz                      | 1.57±0.2   |
| talin 1                                                                                                                      | Tln1                     | 0.26±0.48  |
| TANK-binding kinase 1                                                                                                        | Tbk1                     | 2.39±0.32  |
| tankyrase, TRF1-interacting ankyrin-related ADP-ribose polymerase 2 (predicted)                                              | Tnks2_predicted          | 2.12±0.24  |
| TAO kinase 1                                                                                                                 | Taok1                    | 0.59±0.22  |
| TAP binding protein                                                                                                          | Tapbp                    | 0.73±0.17  |
| TAR (HIV) RNA binding protein 2                                                                                              | Tarbp2                   | 0.72±0.14  |
| TAR DNA binding protein                                                                                                      | Tardbp                   | 7±1.7      |
| target of EGR1, member 1 (nuclear) (predicted)                                                                               | Toe1_predicted           | 0.23±0.07  |
| target of myb1 homolog (chicken)                                                                                             | Tom1                     | 5.56±0.71  |
| Target of myb1-like 2 (chicken) (predicted)                                                                                  | Tom1l2_predicted         | 1.67±0.3   |
| taspace, threonine aspartase 1 (predicted)                                                                                   | Tasp1_predicted          | 0.49±0.03  |
| TATA box binding protein                                                                                                     | Tbp                      | 0.79±0.03  |
| TATA box binding protein-like 1                                                                                              | Tbpl1                    | 2.33±0.22  |

|                                                                    |                    |            |
|--------------------------------------------------------------------|--------------------|------------|
| TatD DNase domain containing 2                                     | Tatdn2             | 2.58±0.2   |
| Tax1 (human T-cell leukemia virus type I) binding protein 1        | Tax1bp1            | 12±1.67    |
| Tax1 (human T-cell leukemia virus type I) binding protein 3        | Tax1bp3            | 2.17±0.52  |
| TBC1 domain family, member 1 (predicted)                           | Tbc1d1_predicted   | 2.75±0.38  |
| TBC1 domain family, member 10a                                     | Tbc1d10a           | 3.2±1.24   |
| TBC1 domain family, member 14                                      | Tbc1d14            | 5.08±1.09  |
| TBC1 domain family, member 15                                      | Tbc1d15            | 3.59±0.13  |
| TBC1 domain family, member 17 (predicted)                          | Tbc1d17_predicted  | 0.59±0.07  |
| TBC1 domain family, member 19 (predicted)                          | Tbc1d19_predicted  | 1.38±0.17  |
| TBC1 domain family, member 2 (predicted)                           | Tbc1d2_predicted   | 0.28±0.05  |
| TBC1 domain family, member 22a (predicted)                         | Tbc1d22a_predicted | 0.47±0.14  |
| TBC1 domain family, member 22B                                     | Tbc1d22b           | 0.82±0.31  |
| TBC1 domain family, member 23 (predicted)                          | Tbc1d23_predicted  | 1.75±0.54  |
| TBC1 domain family, member 7 (predicted)                           | Tbc1d7_predicted   | 0.57±0.02  |
| TBC1 domain family, member 9B                                      | Tbc1d9b            | 1.25±0.18  |
| TBCC domain containing 1                                           | Tbccd1             | 0.89±0.21  |
| T-box 2 (predicted)                                                | Tbx2_predicted     | 0.68±0.13  |
| TCDD-inducible poly(ADP-ribose) polymerase (predicted)             | Tiparp_predicted   | 3.03±0.17  |
| T-cell leukemia translocation altered gene                         | Tcta               | 5.74±1.08  |
| TCF3 (E2A) fusion partner                                          | Ttpt               | 0.2±0.02   |
| t-complex 11 (mouse) like 2                                        | Tcp1112            | 0.21±0.44  |
| t-complex protein 1                                                | Tcp1               | 11.31±1.84 |
| Tctex1 domain containing 2                                         | Tctex1d2           | 1.92±0.24  |
| teashirt zinc finger family member 1                               | Tshz1              | 3.3±0.74   |
| Tectonic 2                                                         | Tect2              | 0.28±0.05  |
| tectonic family member 3                                           | Tctn3              | 1.15±0.25  |
| telomerase associated protein 1                                    | Tep1               | 0.6±0.05   |
| telomeric repeat binding factor 2 (predicted)                      | Terf2_predicted    | 0.41±0.11  |
| telomeric repeat binding factor 2, interacting protein             | Terf2ip            | 2.05±0.16  |
| tensin 1                                                           | Tns1               | 15.82±1.64 |
| TERF1 (TRF1)-interacting nuclear factor 2                          | Tinf2              | 0.75±0.09  |
| terminal uridylyl transferase 1, U6 snRNA-specific                 | Tut1               | 0.24±0.06  |
| testis enhanced gene transcript                                    | Tegt               | 45.05±2.18 |
| testis expressed gene 10 (predicted)                               | Tex10_predicted    | 0.2±0.13   |
| testis expressed gene 2                                            | Tex2               | 3.72±0.2   |
| testis expressed gene 261                                          | Tex261             | 3.02±0.25  |
| testis expressed gene 264                                          | Tex264             | 18.77±2.09 |
| testis specific protein kinase 1                                   | Tesk1              | 0.6±0.17   |
| testis specific X-linked gene                                      | Tsx                | 4.8±0.48   |
| testis-specific kinase 2                                           | Tesk2              | 0.43±0.08  |
| testis-specific protein, Y-encoded-like 1                          | Tspyl1             | 5.51±0.67  |
| tetraspanin 14 (predicted)                                         | Tspan14_predicted  | 5.35±0.29  |
| tetraspanin 18 (predicted)                                         | Tspan18_predicted  | 1.44±0.19  |
| tetraspanin 3                                                      | Tspan3             | 7.15±0.44  |
| tetraspanin 31                                                     | Tspan31            | 4.44±0.54  |
| tetraspanin 33                                                     | Tspan33            | 10.47±1.49 |
| tetraspanin 4                                                      | Tspan4             | 2.17±0.36  |
| tetraspanin 5                                                      | Tspan5             | 4.43±0.64  |
| tetraspanin 6                                                      | Tspan6             | 2.47±0.41  |
| tetratricopeptide repeat domain 1                                  | Ttc1               | 2.14±0.61  |
| tetratricopeptide repeat domain 12                                 | Ttc12              | 0.6±0.13   |
| tetratricopeptide repeat domain 13                                 | Ttc13              | 1.42±0.18  |
| tetratricopeptide repeat domain 15                                 | Ttc15              | 2.15±0.16  |
| tetratricopeptide repeat domain 17                                 | Ttc17              | 0.85±0.04  |
| tetratricopeptide repeat domain 19                                 | Ttc19              | 0.82±0.05  |
| tetratricopeptide repeat domain 21B                                | Ttc21b             | 0.23±0.5   |
| tetratricopeptide repeat domain 23                                 | Ttc23              | 0.69±0.07  |
| tetratricopeptide repeat domain 27                                 | Ttc27              | 0.96±0.18  |
| tetratricopeptide repeat domain 3 (predicted)                      | Ttc3_predicted     | 4.15±0.08  |
| tetratricopeptide repeat domain 33                                 | Ttc33              | 0.71±0.1   |
| tetratricopeptide repeat domain 35                                 | Ttc35              | 9.81±1.43  |
| tetratricopeptide repeat domain 5                                  | Ttc5               | 0.63±0.13  |
| tetratricopeptide repeat domain 7                                  | Ttc7               | 0.81±0.14  |
| tetratricopeptide repeat domain 7B (predicted)                     | Ttc7b_predicted    | 2.19±0.28  |
| Tetratricopeptide repeat domain 8 (predicted)                      | Ttc8_predicted     | 1.14±0.18  |
| Tetratricopeptide repeat domain 9C                                 | Ttc9c              | 1.79±0.22  |
| TG interacting factor 1                                            | Tgif1              | 0.86±0.35  |
| THAP domain containing 11 (predicted)                              | Thap11_predicted   | 0.89±0.04  |
| THAP domain containing 4                                           | Thap4              | 8.56±0.9   |
| THAP domain containing 7                                           | Thap7              | 0.8±0.19   |
| THAP domain containing, apoptosis associated protein 3 (predicted) | Thap3_predicted    | 1.72±0.75  |
| thiamine triphosphatase                                            | Thtpa              | 2.47±0.43  |
| thimet oligopeptidase 1                                            | Thop1              | 0.36±0.25  |
| thioesterase superfamily member 2 (predicted)                      | Them2_predicted    | 3.31±0.28  |
| thioesterase superfamily member 4                                  | Them4              | 0.95±0.19  |
| thiopurine methyltransferase                                       | Tpmt               | 11.47±1.43 |
| thioredoxin 1                                                      | Txn1               | 46.18±2.23 |
| thioredoxin 2                                                      | Txn2               | 8.71±1.09  |
| thioredoxin domain containing 1                                    | Txndc1             | 3.83±0.33  |
| thioredoxin domain containing 11 (predicted)                       | Txndc11_predicted  | 0.77±0.06  |
| thioredoxin domain containing 12 (endoplasmic reticulum)           | Txndc12            | 3.57±0.13  |
| thioredoxin domain containing 13                                   | Txndc13            | 3.8±0.84   |
| thioredoxin domain containing 15                                   | Txndc15            | 5.13±1.31  |
| thioredoxin domain containing 17                                   | Txndc17            | 32.75±0.89 |
| thioredoxin domain containing 4 (endoplasmic reticulum)            | Txndc4             | 7.95±0.76  |
| Thioredoxin domain containing 9                                    | Txndc9             | 1.04±0.1   |
| thioredoxin reductase 1                                            | Txnrd1             | 6.07±1.21  |

|                                                                                                                                      |                            |            |
|--------------------------------------------------------------------------------------------------------------------------------------|----------------------------|------------|
| thioredoxin reductase 2                                                                                                              | Txnrd2                     | 2.55±0.25  |
| thioredoxin-like 1                                                                                                                   | Txn11                      | 12.94±1    |
| thioredoxin-like 4B                                                                                                                  | Txn14b                     | 0.58±0.13  |
| Thioredoxin-related transmembrane protein 2                                                                                          | Tmx2                       | 8.93±1.56  |
| thiosulfate sulfurtransferase, mitochondrial                                                                                         | Tst                        | 32.56±3.28 |
| THO complex 1                                                                                                                        | Thoc1                      | 1.88±0.41  |
| THO complex 2 (predicted)                                                                                                            | Thoc2_predicted            | 0.96±0.59  |
| THO complex 5                                                                                                                        | Thoc5                      | 1±0.21     |
| THO complex 6 homolog (Drosophila)                                                                                                   | Thoc6                      | 0.32±0.08  |
| THO complex 7 homolog (Drosophila)                                                                                                   | Thoc7                      | 7.14±1.13  |
| three prime histone mRNA exonuclease 1                                                                                               | Thex1                      | 0.48±0.1   |
| three prime repair exonuclease 1                                                                                                     | Trex1                      | 0.4±0.07   |
| threonine synthase-like 2 (bacterial)                                                                                                | Thns12                     | 23.95±1.84 |
| threonyl-tRNA synthetase                                                                                                             | Tars                       | 2.78±0.21  |
| threonyl-tRNA synthetase 2, mitochondrial (putative)                                                                                 | Tars2                      | 1.89±0.29  |
| thrombopoietin                                                                                                                       | Thpo                       | 0.21±0.08  |
| THUMP domain containing 1                                                                                                            | Thumpd1                    | 4.38±0.42  |
| THUMP domain containing 3                                                                                                            | Thumpd3                    | 1.03±0.28  |
| thymidine kinase 1                                                                                                                   | Tk1                        | 1.13±0.13  |
| thymidine kinase 2, mitochondrial (predicted)                                                                                        | Tk2_predicted              | 0.47±0.25  |
| thymidylate synthase                                                                                                                 | Tyms                       | 0.31±0.06  |
| thymine-DNA glycosylase                                                                                                              | Tdq                        | 1.52±0.21  |
| thymocyte nuclear protein 1                                                                                                          | Thyn1                      | 0.97±0.05  |
| thymocyte selection-associated high mobility group box                                                                               | Tox                        | 1.29±0.28  |
| Thymoma viral proto-oncogene 1                                                                                                       | Akt1                       | 1.09±0.61  |
| Thymoma viral proto-oncogene 2                                                                                                       | Akt2                       | 1.25±0.06  |
| thymopoietin                                                                                                                         | Tmpo                       | 2.24±0.07  |
| thyroid adenoma associated                                                                                                           | Thada                      | 1.99±0.09  |
| thyroid hormone receptor associated protein 3                                                                                        | Thrap3                     | 3.03±0.47  |
| thyroid hormone receptor beta                                                                                                        | Thrb                       | 0.47±0.06  |
| thyroid hormone receptor interactor 10                                                                                               | Trip10                     | 0.26±0.02  |
| thyroid hormone receptor interactor 12                                                                                               | Trip12                     | 7.04±0.81  |
| thyrotroph embryonic factor                                                                                                          | Tef                        | 1.34±0.17  |
| Tia1 cytotoxic granule-associated RNA binding protein-like 1                                                                         | Tial1                      | 2.02±0.16  |
| Tigger transposable element derived 3 (predicted)                                                                                    | Tiqd3_predicted            | 0.25±0.15  |
| tight junction associated protein 1 (predicted)                                                                                      | Tjap1_predicted            | 0.3±0.1    |
| tight junction protein 2                                                                                                             | Tjp2                       | 1.74±0.24  |
| TIP41, TOR signalling pathway regulator-like (S. cerevisiae) (predicted) /// similar to TIP41, TOR signalling pathway regulator-like | LOC686733 ///              | 1.42±0.14  |
|                                                                                                                                      | Tipr1_predicted            |            |
| tissue factor pathway inhibitor                                                                                                      | Tfpi                       | 4.82±0.66  |
| tissue inhibitor of metalloproteinase 3                                                                                              | Timp3                      | 34.93±1.8  |
| Tissue inhibitor of metalloproteinase 3 (Sorsby fundus dystrophy, pseudoinflammatory)                                                | Timp3                      | 34.24±3.16 |
| tissue inhibitor of metalloproteinase 4                                                                                              | Timp4                      | 0.75±0.2   |
| tissue specific transplantation antigen P35B (predicted)                                                                             | Tsta3_predicted            | 2.6±0.27   |
| TLC domain containing 1                                                                                                              | Tlcd1                      | 1.53±0.22  |
| TM2 domain containing 1 (predicted)                                                                                                  | Tm2d1_predicted            | 6.89±0.25  |
| TM2 domain containing 2                                                                                                              | Tm2d2                      | 3.74±0.25  |
| TM2 domain containing 3 (predicted)                                                                                                  | Tm2d3_predicted            | 5.99±0.65  |
| TM2 domain containing 3 (predicted) /// threonyl-tRNA synthetase-like 2                                                              | Tars12 /// Tm2d3_predicted | 0.4±0.06   |
|                                                                                                                                      | Tmem9b_predicted           | 6.71±0.18  |
| TMEM9 domain family, member B (predicted)                                                                                            | Traf4_predicted            | 3.31±0.14  |
| Tnf receptor associated factor 4 (predicted)                                                                                         | Traf3_predicted            | 0.67±0.13  |
| Tnf receptor-associated factor 3 (predicted)                                                                                         | Traf6_predicted            | 1.16±0.11  |
| Tnf receptor-associated factor 6 (predicted)                                                                                         | Traf7_predicted            | 0.75±0.11  |
| Tnf receptor-associated factor 7 (predicted)                                                                                         | Trap1                      | 5.85±0.69  |
| TNF receptor-associated protein 1                                                                                                    | Tnip1_predicted            | 0.91±0.08  |
| TNFAIP3 interacting protein 1 (predicted)                                                                                            | Tradd                      | 0.28±0.21  |
| TNFRSF1A-associated via death domain                                                                                                 | Ttpa                       | 0.79±0.02  |
| tocopherol (alpha) transfer protein                                                                                                  | Tollip_predicted           | 2.23±0.41  |
| toll interacting protein (predicted)                                                                                                 | Top2a                      | 0.21±0.15  |
| topoisomerase (DNA) 2 alpha                                                                                                          | Top1                       | 4.56±0.48  |
| topoisomerase (DNA) I                                                                                                                | Topbp1                     | 0.81±0.23  |
| topoisomerase (DNA) II beta binding protein                                                                                          | Top3a_predicted            | 0.64±0.14  |
| topoisomerase (DNA) III alpha (predicted)                                                                                            | Top3b_predicted            | 0.9±0.07   |
| topoisomerase (DNA) III beta (predicted)                                                                                             | Topors_predicted           | 2.75±0.08  |
| topoisomerase I binding, arginine/serine-rich (predicted)                                                                            | Tor1aip1                   | 2.92±0.15  |
| torsin A interacting protein 1                                                                                                       | Tor1aip2                   | 1.09±0.1   |
| torsin A interacting protein 2                                                                                                       | Tor1b                      | 1.61±0.32  |
| torsin family 1, member B                                                                                                            | Tor2a                      | 1.98±0.07  |
| torsin family 2, member A                                                                                                            | Tlk1_predicted             | 2.49±0.03  |
| tousled-like kinase 1 (predicted)                                                                                                    | Tlk2_predicted             | 1.13±0.17  |
| tousled-like kinase 2 (Arabidopsis) (predicted)                                                                                      | Tox4                       | 1.3±0.22   |
| TOX high mobility group box family member 4                                                                                          | Triap1                     | 6.24±0.74  |
| TP53 regulated inhibitor of apoptosis 1                                                                                              | Trp53rk_predicted          | 0.79±0.02  |
| TP53 regulating kinase (predicted)                                                                                                   | Tprkb                      | 2.09±0.13  |
| TP53rk binding protein                                                                                                               | Trabd                      | 2.09±0.35  |
| TraB domain containing                                                                                                               | Ttrap                      | 1.23±0.11  |
| Traf and Tnf receptor associated protein                                                                                             | Tank                       | 0.32±0.04  |
| TRAF family member-associated Nf-kappa B activator                                                                                   | Traf1                      | 0.6±0.27   |
| TRAF type zinc finger domain containing 1                                                                                            | Traf3ip2                   | 0.6±0.13   |
| Traf3 interacting protein 2                                                                                                          | Trappc1                    | 11.02±0.7  |
| trafficking protein particle complex 1                                                                                               | Trappc2                    | 1.44±0.07  |
| trafficking protein particle complex 2                                                                                               | Trappc2l                   | 5.39±0.28  |
| trafficking protein particle complex 2-like                                                                                          | Trappc3                    | 5.35±0.41  |
| trafficking protein particle complex 3                                                                                               | Trappc4                    | 1.74±0.12  |
| trafficking protein particle complex 4                                                                                               | Trappc5                    | 2.35±0.45  |
| trafficking protein particle complex 5                                                                                               |                            |            |

|                                                                                                |                        |            |
|------------------------------------------------------------------------------------------------|------------------------|------------|
| trafficking protein particle complex 6A /// similar to trafficking protein particle complex 6A | LOC686599 /// Trappc6a | 4.62±0.61  |
| trafficking protein particle complex 6B (predicted)                                            | Trappc6b_predicted     | 1.65±0.32  |
| trafficking protein, kinesin binding 2                                                         | Trak2                  | 2.63±0.36  |
| trans-acting transcription factor 1                                                            | Sp1                    | 1.57±0.21  |
| transaldolase 1                                                                                | Taldo1                 | 13.62±1.01 |
| transcobalamin 2                                                                               | Tcn2                   | 43.89±3.29 |
| transcription elongation factor A (SII) 1                                                      | Tcea1                  | 7.8±0.28   |
| transcription elongation factor A (SII), 3                                                     | Tcea3                  | 2.02±1.05  |
| transcription elongation factor A (SII)-like 1                                                 | Tceal1                 | 1.35±0.23  |
| transcription elongation factor A (SII)-like 8                                                 | Tceal8                 | 2.39±0.37  |
| transcription elongation factor B (SIII), polypeptide 1                                        | Tceb1                  | 11.91±1.17 |
| transcription elongation factor B (SIII), polypeptide 2                                        | Tceb2                  | 14.04±1.53 |
| transcription elongation factor B (SIII), polypeptide 3                                        | Tceb3                  | 1.68±0.2   |
| transcription elongation regulator 1 (CA150) (predicted)                                       | Tcerg1_predicted       | 1.85±0.1   |
| transcription factor 19                                                                        | Tcf19                  | 0.43±0.05  |
| transcription factor 25 (basic helix-loop-helix)                                               | Tcf25                  | 5.85±0.49  |
| transcription factor A, mitochondrial                                                          | Tfam                   | 2.91±0.44  |
| transcription factor AP4 (predicted)                                                           | Tcfap4_predicted       | 0.33±0.14  |
| transcription factor B1, mitochondrial                                                         | Tfb1m                  | 1.44±0.19  |
| transcription factor B2, mitochondrial                                                         | Tfb2m                  | 3.42±0.44  |
| transcription factor CP2 (predicted)                                                           | Tfcfp2_predicted       | 0.59±0.16  |
| transcription factor CP2-like 2                                                                | Tfcfp2l2               | 0.41±0.16  |
| transcription factor Dp-2 (E2F dimerization partner 2)                                         | Tfdp2                  | 0.64±0.27  |
| transcription factor E3 (predicted)                                                            | Tcfe3_predicted        | 1.15±0.17  |
| transcription factor EC                                                                        | Tcfec                  | 1.15±0.2   |
| transcriptional adaptor 1 (HF11 homolog, yeast) like                                           | Tada1l                 | 0.83±0.09  |
| transcriptional adaptor 3 (NGG1 homolog, yeast)-like                                           | Tada3l                 | 0.63±0.17  |
| transcriptional regulator, SIN3A (yeast) (predicted)                                           | Sin3a_predicted        | 0.55±0.21  |
| transducer of ERBB2, 2                                                                         | Tob2                   | 2.18±0.28  |
| transducer of ErbB-2.1                                                                         | Tob1                   | 6.45±1.18  |
| transducin (beta)-like 1 X-linked (predicted)                                                  | Tbl1x_predicted        | 1.03±0.33  |
| transducin (beta)-like 1X-linked receptor 1 (predicted)                                        | Tbl1xr1_predicted      | 7.15±0.52  |
| transducin (beta)-like 3                                                                       | Tbl3                   | 0.55±0.09  |
| transferrin receptor                                                                           | Tfrc                   | 3.11±1.44  |
| transformation related protein 53                                                              | Trp53                  | 1.68±0.03  |
| transformation related protein 53 binding protein 1 (predicted)                                | Trp53bp1_predicted     | 0.36±0.07  |
| transformation/transcription domain-associated protein (predicted)                             | Trrap_predicted        | 0.3±0.2    |
| transformed mouse 3T3 cell double minute 1                                                     | Mdm1                   | 0.26±0.14  |
| transformed mouse 3T3 cell double minute 2 homolog (mouse) (predicted)                         | Mdm2_predicted         | 1.73±0.45  |
| transformer 2 alpha homolog (Drosophila)                                                       | Tra2a                  | 2.28±0.61  |
| transforming growth factor beta regulated gene 1                                               | Tbrg1                  | 4.58±0.46  |
| transforming growth factor beta regulated gene 4                                               | Tbrg4                  | 1.28±0.11  |
| Transforming growth factor, beta 2                                                             | Tgfb2                  | 0.27±0.07  |
| transforming growth factor, beta receptor 1                                                    | Tgfb1                  | 8.52±1.18  |
| transforming growth factor, beta receptor associated protein 1 (predicted)                     | Tgfbap1_predicted      | 1.01±0.27  |
| transforming, acidic coiled-coil containing protein 2                                          | Tacc2                  | 4.47±0.55  |
| transglutinin 2                                                                                | Tagln2                 | 6.92±1.63  |
| transglutaminase 2, C polypeptide                                                              | Tgm2                   | 36.44±6.29 |
| trans-golgi network protein                                                                    | Tgoln1                 | 18.27±1.35 |
| transient receptor potential cation channel, subfamily C, member 3                             | Trpc3                  | 0.33±0.06  |
| transient receptor potential cation channel, subfamily C, member 4 associated protein          | Trpc4ap                | 2.17±0.37  |
| transient receptor potential cation channel, subfamily M, member 7                             | Trpm7                  | 1.37±0.15  |
| transient receptor potential cation channel, subfamily V, member 1                             | Trpv1                  | 10.38±1.03 |
| transient receptor potential cation channel, subfamily V, member 4                             | Trpv4                  | 3.94±0.29  |
| transient receptor potential cation channel, subfamily V, member 4                             | Trpv1 /// Trpv4        | 3.17±0.31  |
| Transient receptor potential-related protein, Chak                                             | Trpm7                  | 6.06±0.45  |
| transketolase                                                                                  | Tkt                    | 22.11±0.93 |
| translin                                                                                       | Tsn                    | 0.65±0.05  |
| translin-associated factor X                                                                   | Tsnax                  | 6.18±0.67  |
| translocase of inner mitochondrial membrane 10 homolog (yeast)                                 | Timm10                 | 6.26±0.62  |
| translocase of inner mitochondrial membrane 13 homolog (yeast)                                 | Timm13                 | 13.21±2.74 |
| translocase of inner mitochondrial membrane 17a                                                | Timm17a                | 8.17±0.67  |
| translocase of inner mitochondrial membrane 17b                                                | Timm17b                | 1.43±0.08  |
| translocase of inner mitochondrial membrane 22 homolog (yeast)                                 | Timm22                 | 2.61±0.28  |
| translocase of inner mitochondrial membrane 23 homolog (yeast)                                 | Timm23                 | 17±0.67    |
| translocase of inner mitochondrial membrane 44                                                 | Timm44                 | 0.89±0.04  |
| translocase of inner mitochondrial membrane 8 homolog a1 (yeast)                               | Timm8a1                | 2.39±0.08  |
| translocase of inner mitochondrial membrane 8 homolog b (yeast)                                | Timm8b                 | 19.36±3.04 |
| translocase of inner mitochondrial membrane 9 homolog (yeast)                                  | Timm9                  | 3.82±0.68  |
| translocase of outer mitochondrial membrane 20 homolog (yeast)                                 | Tom20                  | 26.47±0.68 |
| translocase of outer mitochondrial membrane 22 homolog (yeast)                                 | Tom22                  | 6.6±0.17   |
| translocase of outer mitochondrial membrane 34 (predicted)                                     | Tom34_predicted        | 0.57±0.14  |
| translocase of outer mitochondrial membrane 40 homolog (yeast)                                 | Tom40                  | 2.52±0.36  |
| translocase of outer mitochondrial membrane 7 homolog (yeast)                                  | Tom7                   | 15.31±2.17 |
| translocase of outer mitochondrial membrane 70 homolog A (yeast)                               | Tom70a                 | 4.68±0.58  |
| translocated promoter region                                                                   | Tpr                    | 1.25±0.36  |
| translocating chain-associating membrane protein 1                                             | Tram1                  | 8.6±1.13   |
| translocation protein 1                                                                        | Tloc1                  | 9.85±1.23  |
| transmembrane 7 superfamily member 2                                                           | Tm7sf2                 | 2.43±0.37  |
| transmembrane 7 superfamily member 3                                                           | Tm7sf3                 | 1.81±0.1   |
| transmembrane 9 superfamily member 1                                                           | Tm9sf1                 | 5.86±0.54  |
| transmembrane 9 superfamily member 2                                                           | Tm9sf2                 | 17.1±1.29  |
| transmembrane 9 superfamily member 3                                                           | Tm9sf3                 | 6.5±1.4    |
| transmembrane 9 superfamily protein member 4                                                   | Tm9sf4                 | 4.56±0.56  |
| transmembrane and coiled coil domains 3                                                        | Tmcc3                  | 1.29±0.04  |
| transmembrane and coiled-coil domains 1                                                        | Tmco1                  | 15.8±2.51  |
| transmembrane and coiled-coil domains 3 (predicted)                                            | Tmco3_predicted        | 1.58±0.4   |



|                                                                                                |                          |            |
|------------------------------------------------------------------------------------------------|--------------------------|------------|
| transmembrane and coiled-coil domains 4                                                        | Tmco4                    | 0.45±0.15  |
| transmembrane and coiled-coil domains 6                                                        | Tmco6                    | 1.27±0.37  |
| transmembrane and tetratricopeptide repeat containing 4                                        | Tmtc4                    | 0.33±0.12  |
| transmembrane and ubiquitin-like domain containing 1                                           | Tmub1                    | 0.54±0.02  |
| transmembrane and ubiquitin-like domain containing 2                                           | Tmub2                    | 2.94±0.39  |
| transmembrane BAX inhibitor motif containing 4                                                 | Tmbim4                   | 6.22±0.97  |
| transmembrane emp24 domain containing 1                                                        | Tmed1                    | 0.87±0.34  |
| transmembrane emp24 domain trafficking protein 2                                               | Tmed2                    | 9.07±1.13  |
| transmembrane emp24 protein transport domain containing 4 (predicted)                          | Tmed4_predicted          | 4.08±0.2   |
| transmembrane emp24 protein transport domain containing 5                                      | Tmed5                    | 1.07±0.14  |
| transmembrane emp24 protein transport domain containing 7                                      | Tmed7                    | 6.74±0.63  |
| transmembrane emp24 protein transport domain containing 9                                      | Tmed9                    | 3.28±0.37  |
| transmembrane emp24-like trafficking protein 10 (yeast)                                        | Tmed10                   | 6.16±0.72  |
| transmembrane phosphoinositide 3-phosphatase and tensin homolog 2                              | Tpte2                    | 0.98±0.23  |
| transmembrane protease, serine 8 (intestinal)                                                  | Tmprss8                  | 0.74±0.48  |
| transmembrane protein 1 (predicted)                                                            | Tmem1_predicted          | 2.1±0.15   |
| transmembrane protein 101                                                                      | Tmem101                  | 0.79±0.16  |
| transmembrane protein 103 (predicted)                                                          | Tmem103_predicted        | 0.96±0.18  |
| transmembrane protein 106A                                                                     | Tmem106a                 | 11.96±1.07 |
| transmembrane protein 106B                                                                     | Tmem106b                 | 5.83±0.23  |
| transmembrane protein 109                                                                      | Tmem109                  | 0.43±0.11  |
| transmembrane protein 11 (predicted)                                                           | Tmem11_predicted         | 2.27±0.23  |
| transmembrane protein 110                                                                      | Tmem110                  | 0.21±0.02  |
| transmembrane protein 111                                                                      | Tmem111                  | 6.22±0.72  |
| transmembrane protein 112B                                                                     | Tmem112b                 | 0.84±0.16  |
| transmembrane protein 115 (predicted)                                                          | Tmem115_predicted        | 2.33±0.19  |
| transmembrane protein 120A                                                                     | Tmem120a                 | 1.93±0.13  |
| transmembrane protein 123                                                                      | Tmem123                  | 14.8±1.67  |
| transmembrane protein 126A                                                                     | Tmem126a                 | 9.85±0.12  |
| transmembrane protein 126B                                                                     | Tmem126b                 | 12.23±0.78 |
| transmembrane protein 128                                                                      | Tmem128                  | 2.02±0.22  |
| transmembrane protein 129                                                                      | Tmem129                  | 1.46±0.44  |
| transmembrane protein 131                                                                      | Tmem131                  | 5.79±0.28  |
| transmembrane protein 134                                                                      | Tmem134                  | 3.33±0.46  |
| transmembrane protein 135                                                                      | Tmem135                  | 0.45±0.13  |
| transmembrane protein 138                                                                      | Tmem138                  | 0.55±0.12  |
| transmembrane protein 139                                                                      | Tmem139                  | 4.05±1.01  |
| transmembrane protein 140                                                                      | Tmem140                  | 13.66±2.16 |
| transmembrane protein 141                                                                      | Tmem141                  | 2.13±0.15  |
| transmembrane protein 143                                                                      | Tmem143                  | 0.7±0.21   |
| transmembrane protein 144                                                                      | Tmem144                  | 3.98±0.51  |
| transmembrane protein 147                                                                      | Tmem147                  | 6.58±0.74  |
| transmembrane protein 14C                                                                      | Tmem14c                  | 4.71±0.36  |
| transmembrane protein 150                                                                      | Tmem150                  | 11.91±0.89 |
| transmembrane protein 157                                                                      | Tmem157                  | 0.82±0.07  |
| transmembrane protein 160                                                                      | Tmem160                  | 3.46±0.32  |
| transmembrane protein 161B                                                                     | Tmem161b                 | 2.29±0.48  |
| transmembrane protein 165                                                                      | Tmem165                  | 1.37±0.22  |
| transmembrane protein 166                                                                      | Tmem166                  | 3.84±0.24  |
| transmembrane protein 168                                                                      | Tmem168                  | 5.24±0.46  |
| transmembrane protein 16F (predicted)                                                          | Tmem16f_predicted        | 4.35±0.44  |
| transmembrane protein 16K                                                                      | Tmem16k                  | 0.85±0.26  |
| transmembrane protein 17                                                                       | Tmem17                   | 0.51±0.11  |
| transmembrane protein 174                                                                      | Tmem174                  | 14.91±1.76 |
| transmembrane protein 176A                                                                     | Tmem176a                 | 0.9±1.18   |
| transmembrane protein 176B                                                                     | Tmem176b                 | 1.99±0.56  |
| transmembrane protein 177                                                                      | Tmem177                  | 0.67±0.07  |
| transmembrane protein 178                                                                      | Tmem178                  | 0.43±0.35  |
| transmembrane protein 179B                                                                     | Tmem179b                 | 4±0.21     |
| transmembrane protein 183A                                                                     | Tmem183a                 | 8.69±0.59  |
| transmembrane protein 185B                                                                     | Tmem185b                 | 10.39±1.88 |
| transmembrane protein 186                                                                      | Tmem186                  | 0.8±0.24   |
| transmembrane protein 188                                                                      | Tmem188                  | 2.66±0.28  |
| transmembrane protein 189 /// similar to ubiquitin-conjugating enzyme E2 variant 1 (predicted) | RGD1562209_predicted /// | 0.48±0.12  |
| transmembrane protein 19                                                                       | Tmem189                  |            |
| transmembrane protein 192                                                                      | Tmem19                   | 0.96±0.13  |
| transmembrane protein 205                                                                      | Tmem192                  | 2.15±0.56  |
| transmembrane protein 208                                                                      | Tmem205                  | 8.07±1.07  |
| transmembrane protein 209                                                                      | Tmem208                  | 4.57±0.21  |
| transmembrane protein 24                                                                       | Tmem209                  | 2.3±0.31   |
| transmembrane protein 27                                                                       | Tmem24                   | 8.96±0.93  |
| transmembrane protein 30A                                                                      | Tmem27                   | 67.69±6.83 |
| transmembrane protein 32 (predicted)                                                           | Tmem30a                  | 9.51±0.55  |
| transmembrane protein 33                                                                       | Tmem32_predicted         | 6.49±1.2   |
| transmembrane protein 34                                                                       | Tmem33                   | 4.4±0.71   |
| transmembrane protein 37                                                                       | Tmem34                   | 3.96±0.64  |
| transmembrane protein 38a (predicted)                                                          | Tmem37                   | 13.86±0.55 |
| transmembrane protein 38B                                                                      | Tmem38a_predicted        | 0.41±0.26  |
| transmembrane protein 39a                                                                      | Tmem38b                  | 1.91±0.08  |
| transmembrane protein 39b                                                                      | Tmem39a                  | 0.52±0.03  |
| transmembrane protein 4                                                                        | Tmem39b                  | 3.85±0.54  |
| transmembrane protein 41B                                                                      | Tmem4                    | 5.05±0.67  |
| transmembrane protein 42 (predicted)                                                           | Tmem41b                  | 12.02±0.95 |
| transmembrane protein 43                                                                       | Tmem42_predicted         | 5.68±0.98  |
| transmembrane protein 49                                                                       | Tmem43                   | 2.14±0.18  |
| transmembrane protein 5                                                                        | Tmem49                   | 4.88±0.4   |
|                                                                                                | Tmem5                    | 0.7±0.05   |

|                                                                          |                                  |            |
|--------------------------------------------------------------------------|----------------------------------|------------|
| transmembrane protein 50A (predicted)                                    | Tmem50a_predicted                | 6.16±0.18  |
| transmembrane protein 50B                                                | Tmem50b                          | 1.6±0.21   |
| transmembrane protein 51                                                 | Tmem51                           | 5.12±0.28  |
| transmembrane protein 53 (predicted)                                     | Tmem53_predicted                 | 0.9±0.1    |
| transmembrane protein 55A                                                | Tmem55a                          | 3.23±0.66  |
| transmembrane protein 55B                                                | Tmem55b                          | 2.14±0.11  |
| transmembrane protein 57                                                 | Tmem57                           | 1.2±0.18   |
| transmembrane protein 60 (predicted)                                     | Tmem60_predicted                 | 2.23±0.21  |
| transmembrane protein 62                                                 | Tmem62                           | 1.18±0.25  |
| transmembrane protein 63a (predicted)                                    | Tmem63a_predicted                | 1.03±0.27  |
| transmembrane protein 66                                                 | Tmem66                           | 5.97±0.96  |
| transmembrane protein 67                                                 | Tmem67                           | 1.28±0.54  |
| transmembrane protein 68 (predicted)                                     | Tmem68_predicted                 | 1.59±0.14  |
| transmembrane protein 69                                                 | Tmem69                           | 3.63±0.08  |
| transmembrane protein 77                                                 | Tmem77                           | 19.62±1.63 |
| transmembrane protein 79                                                 | Tmem79                           | 4.34±0.14  |
| transmembrane protein 8 (five membrane-spanning domains) (predicted)     | Tmem8_predicted                  | 12.37±0.72 |
| transmembrane protein 82                                                 | Tmem82                           | 1.49±0.37  |
| transmembrane protein 85                                                 | Tmem85                           | 8.74±1.05  |
| transmembrane protein 86A (predicted)                                    | Tmem86a_predicted                | 11.07±1.15 |
| transmembrane protein 87A (predicted)                                    | Tmem87a_predicted                | 0.77±0.33  |
| transmembrane protein 87B                                                | Tmem87b                          | 1.75±0.17  |
| transmembrane protein 9 (predicted)                                      | Tmem9_predicted                  | 2.38±0.38  |
| transmembrane protein 93 (predicted)                                     | Tmem93_predicted                 | 7.27±0.74  |
| transmembrane protein 97                                                 | Tmem97                           | 2.17±0.41  |
| transmembrane protein 98                                                 | Tmem98                           | 2.73±0.25  |
| transporter 1, ATP-binding cassette, sub-family B (MDR)                  | Btnl3 /// Btnl4 /// Btnl5 ///    | 7.39±3.78  |
|                                                                          | Hla-dma /// Hla-dmb ///          |            |
|                                                                          | Psmb9 ///                        |            |
|                                                                          | RGD1562488_predicted ///         |            |
|                                                                          | RT1-Ba /// RT1-Bb /// RT1-Da /// |            |
|                                                                          | RT1-Db1 /// RT1-DOb ///          |            |
|                                                                          | Tap1 /// Tap2 ///                |            |
| transportin 1                                                            | Tnpo1                            | 0.9±0.06   |
| transportin 2 (importin 3, karyopherin beta 2b) (predicted)              | Tnpo2_predicted                  | 2.2±0.22   |
| transportin 3                                                            | Tnpo3                            | 4.49±1.32  |
| tribbles homolog 1 (Drosophila)                                          | Trib1                            | 0.67±0.04  |
| tribbles homolog 2 (Drosophila)                                          | Trib2                            | 0.47±0.4   |
| trichoplein, keratin filament binding (predicted)                        | Tchp_predicted                   | 0.58±0.1   |
| trichorhinophalangeal syndrome I (human)                                 | Trps1                            | 2.12±0.24  |
| trimethylguanosine synthase homolog (S. cerevisiae)                      | Tgs1                             | 0.77±0.04  |
| trimethyllysine hydroxylase, epsilon                                     | Tmlhe                            | 6.2±1.02   |
| trinucleotide repeat containing 6a                                       | Tnrc6a                           | 0.8±0.19   |
| trinucleotide repeat containing 6B                                       | Tnrc6b                           | 0.84±0.13  |
| TRIO and F-actin binding protein                                         | Triobp                           | 0.59±0.12  |
| triosephosphate isomerase 1                                              | Tpi1                             | 29.51±1.73 |
| tripartite motif protein 14 (predicted)                                  | Trim14_predicted                 | 1.51±0.08  |
| tripartite motif protein 32                                              | Trim32                           | 4±0.06     |
| Tripartite motif protein 37 (predicted)                                  | Trim37_predicted                 | 0.8±0.2    |
| tripartite motif protein 8 (predicted) /// tripartite motif-containing 8 | Trim8 /// Trim8_predicted        | 2.25±0.44  |
| tripartite motif-containing 11                                           | Trim11                           | 2±0.08     |
| tripartite motif-containing 23                                           | Trim23                           | 0.41±0.08  |
| tripartite motif-containing 24                                           | Trim24                           | 0.2±0.16   |
| tripartite motif-containing 25                                           | Trim25                           | 1.78±0.35  |
| tripartite motif-containing 26                                           | Trim26                           | 0.23±0.11  |
| tripartite motif-containing 27                                           | Trim27                           | 2.04±0.31  |
| tripartite motif-containing 28                                           | Trim28                           | 3.28±0.39  |
| tripartite motif-containing 3                                            | Trim3                            | 1.21±0.09  |
| tripartite motif-containing 33                                           | Trim33                           | 1.16±0.26  |
| tripartite motif-containing 35                                           | Trim35                           | 17.36±1.41 |
| tripartite motif-containing 37                                           | Trim37                           | 0.51±0.13  |
| tripartite motif-containing 39                                           | Trim39                           | 0.53±0.09  |
| tripartite motif-containing 41                                           | Trim41                           | 1.12±0.16  |
| tripartite motif-containing 46                                           | Trim46                           | 0.38±0.16  |
| tripartite motif-containing 59 (predicted)                               | Trim59_predicted                 | 2.39±0.22  |
| tripartite motif-containing 63                                           | Trim63                           | 0.36±0.05  |
| tripeptidyl peptidase I                                                  | Tpp1                             | 19.72±2.2  |
| tripeptidyl peptidase II                                                 | Tpp2                             | 3.45±0.47  |
| triple functional domain (PTPRF interacting)                             | Trio                             | 2.27±0.23  |
| Trk-fused gene                                                           | Tfg                              | 3.96±0.95  |
| TRM1 tRNA methyltransferase 1 homolog (S. cerevisiae)                    | Trmt1                            | 1.04±0.29  |
| TRM5 tRNA methyltransferase 5 homolog (S. cerevisiae) (predicted)        | Trmt5_predicted                  | 0.52±0.13  |
| tRNA isopentenyltransferase 1 (predicted)                                | Trit1_predicted                  | 1.2±0.11   |
| tRNA methyltransferase 12 homolog (S. cerevisiae)                        | Trmt12                           | 0.24±0.1   |
| tRNA methyltransferase 6 homolog (S. cerevisiae)                         | Trmt6                            | 0.56±0.06  |
| tRNA nucleotidyl transferase, CCA-adding, 1                              | Trnt1                            | 3.64±0.56  |
| tRNA selenocysteine associated protein                                   | Secp43                           | 4.91±0.44  |
| tRNA splicing endonuclease 2 homolog (SEN2, S. cerevisiae)               | Tsen2                            | 0.34±0.03  |
| tRNA splicing endonuclease 34 homolog (SEN34, S. cerevisiae)             | Tsen34                           | 3.9±0.7    |
| tRNA splicing endonuclease 54 homolog (S. cerevisiae)                    | Tsen54                           | 0.56±0.17  |
| tRNA-yW synthesizing protein 1 homolog (S. cerevisiae)                   | Tyw1                             | 0.47±0.23  |
| tRNA-yW synthesizing protein 3 homolog (S. cerevisiae)                   | Tyw3                             | 0.77±0.18  |
| tropomodulin 3                                                           | Tmod3                            | 0.71±0.65  |
| tropomyosin 3, gamma                                                     | Tpm3                             | 12.62±0.16 |
| TruB pseudouridine (psi) synthase homolog 1 (E. coli)                    | Trub1                            | 0.54±0.02  |
| TruB pseudouridine (psi) synthase homolog 2 (E. coli)                    | Trub2                            | 2.94±0.72  |

|                                                                                                                                      |                          |            |
|--------------------------------------------------------------------------------------------------------------------------------------|--------------------------|------------|
| trypsin domain containing 1 (predicted)                                                                                              | Tysnd1_predicted         | 2.52±0.28  |
| tryptophan rich basic protein                                                                                                        | Wrb                      | 1.12±0.34  |
| tryptophanyl-tRNA synthetase                                                                                                         | Wars                     | 2.9±0.22   |
| TSC22 domain family 3                                                                                                                | Tsc22d3                  | 3.53±0.35  |
| TSC22 domain family, member 1                                                                                                        | Tsc22d1                  | 38.58±3.38 |
| TSPY-like 4                                                                                                                          | Tspy4                    | 0.95±0.23  |
| tsukushin                                                                                                                            | Tsku                     | 1.92±0.22  |
| Tu translation elongation factor, mitochondrial (predicted)                                                                          | Tufm_predicted           | 12.81±0.5  |
| tubby like protein 4                                                                                                                 | Tulp4                    | 0.62±0.06  |
| tuberous sclerosis 2                                                                                                                 | Tsc2                     | 1.28±0.25  |
| tubulin cofactor a                                                                                                                   | Tbca                     | 21.94±1.18 |
| tubulin folding cofactor B                                                                                                           | Tbcb                     | 4.86±0.17  |
| Tubulin tyrosine ligase                                                                                                              | Ttl                      | 0.49±0.07  |
| tubulin tyrosine ligase-like family, member 7                                                                                        | Ttl7                     | 0.47±0.09  |
| tubulin, alpha 1A /// tubulin, alpha 1C /// tubulin, alpha 1B                                                                        | Tuba1a /// Tuba1b ///    | 3.32±1.08  |
|                                                                                                                                      | Tuba1c                   |            |
| tubulin, alpha 4A                                                                                                                    | Tuba4a                   | 9.22±0.51  |
| tubulin, beta 2a                                                                                                                     | Tubb2a                   | 0.21±0.43  |
| tubulin, beta 2c                                                                                                                     | Tubb2c                   | 14.37±1.32 |
| tubulin, beta 4                                                                                                                      | Tubb4                    | 0.36±0.16  |
| tubulin, beta 5                                                                                                                      | Tubb5                    | 0.55±0.31  |
| tubulin, gamma 1                                                                                                                     | Tubg1                    | 1.14±0.05  |
| tubulin, gamma complex associated protein 2                                                                                          | Tubgcp2                  | 1.24±0.15  |
| tubulin, gamma complex associated protein 3                                                                                          | Tubgcp3                  | 0.38±0.08  |
| tubulin-specific chaperone c (predicted)                                                                                             | Tbcc_predicted           | 0.85±0.11  |
| tubulin-specific chaperone d                                                                                                         | Tbcd                     | 2.04±0.15  |
| tubulin-specific chaperone e                                                                                                         | Tbce                     | 2.47±0.18  |
| tubulointerstitial nephritis antigen                                                                                                 | Tinaq                    | 32.99±3.1  |
| tudor domain containing 3                                                                                                            | Tdr3                     | 0.37±0.37  |
| tudor domain containing 7                                                                                                            | Tdr7                     | 1.43±0.17  |
| tumor necrosis factor (ligand) superfamily, member 13                                                                                | Tnfsf13                  | 3.94±0.21  |
| tumor necrosis factor receptor superfamily, member 14 (herpesvirus entry mediator)                                                   | Tnfrsf14                 | 5.22±0.56  |
| tumor necrosis factor receptor superfamily, member 1a                                                                                | Tnfrsf1a                 | 1.16±0.41  |
| tumor necrosis factor receptor superfamily, member 21 (predicted)                                                                    | Tnfrsf21_predicted       | 4.83±1.11  |
| tumor necrosis factor receptor superfamily, member 9                                                                                 | Tnfrsf9                  | 0.85±0.19  |
| tumor necrosis factor superfamily, member 5-induced protein 1 (predicted)                                                            | Tnfsf5ip1_predicted      | 3.02±0.31  |
| tumor necrosis factor, alpha-induced protein 1 (endothelial)                                                                         | Tnfaip1                  | 3.57±0.3   |
| tumor necrosis factor, alpha-induced protein 8 (predicted)                                                                           | Tnfaip8_predicted        | 18.46±0.74 |
| tumor protein D52 (predicted)                                                                                                        | Tpd52_predicted          | 1.83±0.2   |
| tumor protein D52-like 2                                                                                                             | Tpd52l2                  | 1.07±0.13  |
| tumor protein p53 inducible nuclear protein 2                                                                                        | Trp53inp2                | 4.3±0.23   |
| tumor protein, translationally-controlled 1                                                                                          | Tpt1                     | 52.82±0.91 |
| tumor rejection antigen gp96 (predicted)                                                                                             | Tra1_predicted           | 15.4±4.18  |
| tumor suppressing subtransferable candidate 1                                                                                        | Tssc1                    | 0.62±0.2   |
| tumor suppressor candidate 2                                                                                                         | Tusc2                    | 1.11±0.07  |
| tumor suppressor candidate 3                                                                                                         | Tusc3                    | 3.61±0.44  |
| tumor suppressor candidate 4                                                                                                         | Tusc4                    | 1.91±0.07  |
| tumor susceptibility gene 101                                                                                                        | Tsg101                   | 3.09±0.2   |
| tumor-associated calcium signal transducer 1                                                                                         | Tacsd1                   | 29.56±1.15 |
| tumor-suppressing subchromosomal transferable fragment 4                                                                             | Tssc4                    | 1.05±0.34  |
| wee1 homolog 2 (Drosophila)                                                                                                          | Ttyh2                    | 1.66±0.43  |
| wee1 homolog 3 (Drosophila) (predicted)                                                                                              | Ttyh3_predicted          | 3.56±0.53  |
| twinfilin, actin-binding protein, homolog 1 (Drosophila)                                                                             | Twf1                     | 14.58±0.81 |
| TWIST neighbor (predicted)                                                                                                           | Twistnb_predicted        | 1.74±0.21  |
| twisted gastrulation homolog 1 (Drosophila) (predicted)                                                                              | Twsq1_predicted          | 4.1±0.68   |
| two pore channel 1                                                                                                                   | Tpcn1                    | 5.98±0.34  |
| type 1 tumor necrosis factor receptor shedding aminopeptidase regulator                                                              | Arts1                    | 4.77±0.52  |
| tyrosine 3-monooxygenase/tryptophan 5-monooxygenase activation protein, beta polypeptide                                             | Ywhab                    | 8.81±0.12  |
| tyrosine 3-monooxygenase/tryptophan 5-monooxygenase activation protein, epsilon polypeptide                                          | Ywhae                    | 14.95±0.7  |
| tyrosine 3-monooxygenase/tryptophan 5-monooxygenase activation protein, eta polypeptide                                              | Ywhah                    | 1.21±0.56  |
| tyrosine 3-monooxygenase/tryptophan 5-monooxygenase activation protein, gamma polypeptide                                            | Ywhag                    | 4.18±0.35  |
| tyrosine 3-monooxygenase/tryptophan 5-monooxygenase activation protein, theta polypeptide                                            | Ywhaq                    | 14.89±0.42 |
| tyrosine 3-monooxygenase/tryptophan 5-monooxygenase activation protein, zeta polypeptide                                             | Ywhaz                    | 13.99±0.32 |
| tyrosylprotein sulfotransferase 2                                                                                                    | Tpst2                    | 3.03±0.34  |
| tyrosyl-tRNA synthetase                                                                                                              | Yars                     | 1.84±0.54  |
| tyrosyl-tRNA synthetase 2 (mitochondrial)                                                                                            | Yars2                    | 1.69±0.23  |
| U1 small nuclear ribonucleoprotein C /// similar to U1 small nuclear ribonucleoprotein C (U1 snRNP protein C) (U1C protein) (U1-C)   | LOC685273 /// Snrpc      | 4.43±0.78  |
| U1 small nuclear ribonucleoprotein polypeptide A (predicted)                                                                         | Snrp70_predicted         | 1.7±0.43   |
| U2 small nuclear ribonucleoprotein auxiliary factor (U2AF) 2 /// similar to U2 (RNU2) small nuclear RNA auxiliary factor 2 isoform b | LOC690372 /// U2af2      | 4.09±0.59  |
| U2 small nuclear ribonucleoprotein B (predicted)                                                                                     | Snrb2_predicted          | 1.23±0.22  |
| U2 small nuclear RNA auxiliary factor 1-like 4 /// similar to Hypothetical protein MGC30332 (predicted)                              | RGD1563574_predicted /// | 0.86±0.22  |
|                                                                                                                                      | U2af1l4                  |            |
| U7 snRNP-specific Sm-like protein LSM10                                                                                              | Lsm10                    | 1.25±0.19  |
| UbiA prenyltransferase domain containing 1 (predicted)                                                                               | Ubiad1_predicted         | 0.44±0.2   |
| ubiquitin 1 (predicted)                                                                                                              | Ubn1_predicted           | 1.47±0.12  |
| Ubiquitin 1                                                                                                                          | Ubq1n1                   | 6.18±0.61  |
| ubiquitin 2 (predicted)                                                                                                              | Ubq1n2_predicted         | 4.03±0.67  |
| ubiquitin 4 (predicted)                                                                                                              | Ubq1n4_predicted         | 0.66±0.34  |
| ubiquinol cytochrome c reductase core protein 2                                                                                      | Uqcrc2                   | 41.12±3.96 |
| ubiquinol-cytochrome c reductase binding protein (predicted)                                                                         | LOC687741 /// Uqcrb ///  | 48.31±0.5  |
|                                                                                                                                      | Uqcrb_predicted          |            |
| ubiquinol-cytochrome c reductase core protein 1                                                                                      | Uqcrc1                   | 26.62±3.59 |
| ubiquinol-cytochrome c reductase hinge protein                                                                                       | Uqcrh                    | 35.91±2.04 |
| ubiquinol-cytochrome c reductase, 6.4kDa subunit                                                                                     | Uqcr                     | 28.55±3.26 |
| ubiquinol-cytochrome c reductase, complex III subunit VII                                                                            | Uqcrcq                   | 27.17±5.74 |
| ubiquinol-cytochrome c reductase, Rieske iron-sulfur polypeptide 1                                                                   | Uqcrcfs1                 | 40.83±3.14 |
| ubiquitin A-52 residue ribosomal protein fusion product 1                                                                            | Uba52                    | 23.93±3.43 |

|                                                                                                        |                          |            |
|--------------------------------------------------------------------------------------------------------|--------------------------|------------|
| ubiquitin associated domain containing 1                                                               | Ubc1                     | 2.81±0.36  |
| ubiquitin B                                                                                            | Ubb                      | 42.85±3.26 |
| ubiquitin C                                                                                            | Ubc                      | 27.37±2.15 |
| ubiquitin carboxyl-terminal esterase L3 (ubiquitin thiolesterase)                                      | LOC679036 ///            | 4.03±0.78  |
|                                                                                                        | RGD1561196_predicted /// |            |
| ubiquitin carboxyl-terminal esterase L5                                                                | Uchl3                    |            |
| ubiquitin family domain containing 1                                                                   | Uchl5                    | 4.67±0.58  |
| ubiquitin fusion degradation 1-like                                                                    | Ubfd1                    | 0.82±0.18  |
| ubiquitin interaction motif containing 1                                                               | Ufd1l                    | 2.26±0.12  |
| ubiquitin protein ligase E3A (predicted)                                                               | Uimc1                    | 1.19±0.45  |
| ubiquitin protein ligase E3C                                                                           | Ube3a_predicted          | 4.35±0.31  |
| ubiquitin related modifier 1 homolog (S. cerevisiae)                                                   | Ube3c                    | 1.52±0.16  |
| ubiquitin specific peptidase 1                                                                         | Urm1                     | 0.58±0.06  |
| ubiquitin specific peptidase 10                                                                        | Usp1                     | 1.15±0.12  |
| ubiquitin specific peptidase 11                                                                        | Usp10                    | 4.79±0.28  |
| ubiquitin specific peptidase 12                                                                        | Usp11                    | 0.27±0.08  |
| ubiquitin specific peptidase 14                                                                        | Usp12                    | 0.59±0.02  |
| ubiquitin specific peptidase 15                                                                        | Usp14                    | 4.73±0.27  |
| ubiquitin specific peptidase 19                                                                        | Usp15                    | 1.44±0.2   |
| ubiquitin specific peptidase 2                                                                         | Usp19                    | 1.81±0.24  |
| ubiquitin specific peptidase 20                                                                        | Usp2                     | 1.05±0.48  |
| ubiquitin specific peptidase 25                                                                        | Usp20                    | 1.48±0.09  |
| ubiquitin specific peptidase 28                                                                        | Usp25                    | 4.32±0.92  |
| ubiquitin specific peptidase 3                                                                         | Usp28                    | 0.51±0.04  |
| ubiquitin specific peptidase 33                                                                        | Usp3                     | 1.72±0.2   |
| ubiquitin specific peptidase 36                                                                        | Usp33                    | 7.6±1.14   |
| ubiquitin specific peptidase 38                                                                        | Usp36                    | 0.95±0.01  |
| ubiquitin specific peptidase 39                                                                        | Usp38                    | 1.31±0.16  |
| ubiquitin specific peptidase 4 (proto-oncogene)                                                        | Usp39                    | 1.45±0.27  |
| ubiquitin specific peptidase 40                                                                        | Usp4                     | 2.4±0.76   |
| ubiquitin specific peptidase 42                                                                        | Usp40                    | 2.78±0.31  |
| ubiquitin specific peptidase 46                                                                        | Usp42                    | 0.62±0.16  |
| ubiquitin specific peptidase 47                                                                        | Usp46                    | 1.05±0.08  |
| ubiquitin specific peptidase 5 (isopeptidase T)                                                        | Usp47                    | 3.16±0.61  |
| ubiquitin specific peptidase 7                                                                         | Usp5                     | 2.55±0.45  |
| ubiquitin specific peptidase 8                                                                         | Usp7                     | 1.78±0.16  |
| Ubiquitin specific peptidase 9, X chromosome (predicted)                                               | Usp8                     | 5.62±1.29  |
| ubiquitin specific peptidase like 1                                                                    | Usp9x_predicted          | 2.9±0.23   |
| ubiquitin specific protease 24 (predicted)                                                             | Usp1                     | 0.61±0.08  |
| ubiquitin specific protease 32 (predicted)                                                             | Usp24_predicted          | 1.77±0.47  |
| ubiquitin specific protease 48                                                                         | Usp32_predicted          | 1.58±0.16  |
| Ubiquitin specific protease 7 (herpes virus-associated)                                                | Usp48                    | 0.9±0.26   |
| ubiquitin-activating enzyme E1C                                                                        | Usp7                     | 2.79±0.21  |
| ubiquitin-activating enzyme E1-domain containing 1                                                     | Ube1c                    | 6.23±0.26  |
| ubiquitin-activating enzyme E1-like 2                                                                  | Ube1dc1                  | 1.79±0.48  |
| ubiquitin-associated protein 1                                                                         | Ube1l2                   | 0.98±0.06  |
| ubiquitin-associated protein 2 (predicted)                                                             | Ubap1                    | 2.21±0.52  |
| ubiquitination factor E4A, UFD2 homolog (S. cerevisiae)                                                | Ubap2_predicted          | 2.33±0.35  |
| ubiquitination factor E4B, UFD2 homolog (S. cerevisiae) (predicted)                                    | Ube4a                    | 5.43±0.9   |
| ubiquitin-conjugating enzyme E2 variant 1 (predicted)                                                  | Ube4b_predicted          | 1.59±0.65  |
| ubiquitin-conjugating enzyme E2 variant 2                                                              | Ube2v1_predicted         | 5.77±1.29  |
| Ubiquitin-conjugating enzyme E2, J1 (predicted)                                                        | Ube2v2                   | 3.03±0.52  |
| ubiquitin-conjugating enzyme E2, J2 homolog (yeast)                                                    | Ube2j1_predicted         | 2.44±0.42  |
| ubiquitin-conjugating enzyme E2A, RAD6 homolog (S. cerevisiae)                                         | Ube2j2                   | 1.18±0.16  |
| ubiquitin-conjugating enzyme E2B, RAD6 homolog (S. cerevisiae)                                         | Ube2a                    | 2.71±0.39  |
| ubiquitin-conjugating enzyme E2C (predicted)                                                           | Ube2b                    | 7.93±0.5   |
| ubiquitin-conjugating enzyme E2D 1, UBC4/5 homolog (yeast) (predicted)                                 | Ube2c_predicted          | 0.39±0.12  |
| Ubiquitin-conjugating enzyme E2D 2                                                                     | Ube2d1_predicted         | 0.39±0.06  |
| ubiquitin-conjugating enzyme E2D 3 (UBC4/5 homolog, yeast)                                             | Ube2d2                   | 5.92±0.42  |
| ubiquitin-conjugating enzyme E2E 2 (UBC4/5 homolog, yeast)                                             | Ube2d3                   | 21.74±0.37 |
| ubiquitin-conjugating enzyme E2E 3, UBC4/5 homolog (yeast) (predicted)                                 | Ube2e2                   | 5.31±0.99  |
| ubiquitin-conjugating enzyme E2F (putative)                                                            | Ube2e3_predicted         | 8.31±0.78  |
| ubiquitin-conjugating enzyme E2G 1 (UBC7 homolog, C. elegans)                                          | Ube2f                    | 5.42±0.56  |
| ubiquitin-conjugating enzyme E2G 2 (predicted)                                                         | Ube2g1                   | 4.62±1     |
| ubiquitin-conjugating enzyme E2I                                                                       | Ube2g2_predicted         | 1.01±0.18  |
| ubiquitin-conjugating enzyme E2L 3 (predicted)                                                         | Ube2i                    | 3.7±0.25   |
| ubiquitin-conjugating enzyme E2M (UBC12 homolog, yeast) (predicted)                                    | Ube2l3_predicted         | 7.22±0.59  |
| ubiquitin-conjugating enzyme E2M (UBC12 homolog, yeast) (predicted) /// chromatin modifying protein 2A | Ube2m_predicted          | 4.96±0.88  |
|                                                                                                        | Chmp2a ///               | 7.84±0.2   |
| ubiquitin-conjugating enzyme E2N                                                                       | Ube2m_predicted          |            |
| ubiquitin-conjugating enzyme E2O (predicted)                                                           | Ube2n                    | 4.11±0.42  |
| ubiquitin-conjugating enzyme E2Q (putative) 1                                                          | Ube2o_predicted          | 0.51±0.23  |
| ubiquitin-conjugating enzyme E2Q (putative) 2 (predicted)                                              | Ube2q1                   | 4.49±0.34  |
| ubiquitin-conjugating enzyme E2S (predicted)                                                           | Ube2q2_predicted         | 4.04±0.31  |
| ubiquitin-conjugating enzyme E2Z (putative)                                                            | Ube2s_predicted          | 2.59±0.4   |
| ubiquitin-fold modifier 1                                                                              | Ube2z                    | 1.6±0.1    |
| ubiquitin-fold modifier conjugating enzyme 1                                                           | Ufm1                     | 6.67±0.81  |
| ubiquitin-like 3                                                                                       | Ufc1                     | 5.44±0.95  |
| ubiquitin-like 4                                                                                       | Ubl3                     | 7.84±1.57  |
| ubiquitin-like 5                                                                                       | Ubl4                     | 3.35±0.43  |
| ubiquitin-like 7 (bone marrow stromal cell-derived)                                                    | Ubl5                     | 12.72±1.21 |
| ubiquitin-like domain containing CTD phosphatase 1                                                     | Ubl7                     | 1.67±0.55  |
| ubiquitin-like modifier activating enzyme 1                                                            | Ublcp1                   | 3.7±0.2    |
| ubiquitin-like, containing PHD and RING finger domains 2 (predicted)                                   | Uba1                     | 5.8±0.63   |
| ubiquitously expressed transcript                                                                      | Uhrf2_predicted          | 3.49±0.61  |
| ubiquitously transcribed tetratricopeptide repeat gene, X chromosome (predicted)                       | Uxt                      | 3.58±0.24  |
|                                                                                                        | Utx_predicted            | 2.4±0.5    |

|                                                                                              |                       |            |
|----------------------------------------------------------------------------------------------|-----------------------|------------|
| UBX domain containing 1                                                                      | Ubx1                  | 1.81±0.25  |
| UBX domain containing 2                                                                      | Ubx2                  | 9.56±0.26  |
| UBX domain containing 4                                                                      | Ubx4                  | 4.22±0.5   |
| UBX domain containing 6 (predicted)                                                          | Ubx6_predicted        | 3.31±0.49  |
| UBX domain containing 8                                                                      | Ubx8                  | 1.6±0.36   |
| UCHL5 interacting protein                                                                    | Uchl5ip               | 0.94±0.22  |
| UDP glucuronosyltransferase 2 family, polypeptide B36                                        | Ugt2b36               | 5.02±3.99  |
| UDP glycosyltransferase 1 family, polypeptide A1                                             | Ugt1a1 /// Ugt1a2 /// | 6.12±3.17  |
|                                                                                              | Ugt1a3 /// Ugt1a5 /// |            |
|                                                                                              | Ugt1a6 /// Ugt1a7 /// |            |
|                                                                                              | Ugt1a8 /// Ugt1a9 /// |            |
| UDP-Gal:betaGal beta 1,3-galactosyltransferase, polypeptide 6 (predicted)                    | B3gal6_predicted      | 0.26±0.06  |
| UDP-Gal:betaGlcNAc beta 1,4- galactosyltransferase, polypeptide 1                            | B4gal1_predicted      | 0.64±0.34  |
| UDP-Gal:betaGlcNAc beta 1,4-galactosyltransferase, polypeptide 3                             | B4gal3                | 1.9±0.24   |
| UDP-Gal:betaGlcNAc beta 1,4-galactosyltransferase, polypeptide 5 (predicted)                 | B4gal5_predicted      | 0.28±0.06  |
| UDP-Gal:betaGlcNAc beta 1,4-galactosyltransferase, polypeptide 6                             | B4gal6                | 0.64±0.29  |
| UDP-GlcNAc:betaGal beta-1,3-N-acetylglucosaminyltransferase 1                                | B3gnt1                | 3.78±0.14  |
| UDP-GlcNAc:betaGal beta-1,3-N-acetylglucosaminyltransferase 7                                | B3gnt7                | 0.28±0.01  |
| UDP-glucose dehydrogenase                                                                    | Ugdh                  | 18.04±1.73 |
| UDP-glucose pyrophosphorylase 2                                                              | Ugp2                  | 8.27±0.26  |
| UDP-glucuronate decarboxylase 1                                                              | Uxs1                  | 1.67±0.12  |
| UDP-glucuronosyltransferase                                                                  | LOC286989             | 1.13±0.35  |
| UDP-N-acetyl-alpha-D-galactosamine:polypeptide N-acetylglucosaminyltransferase 1             | Galnt1                | 4.38±0.51  |
| UDP-N-acetyl-alpha-D-galactosamine:polypeptide N-acetylglucosaminyltransferase 11            | Galnt11               | 19.06±4.35 |
| UDP-N-acetyl-alpha-D-galactosamine:polypeptide N-acetylglucosaminyltransferase 14            | Galnt14               | 3.39±0.6   |
| UDP-N-acetyl-alpha-D-galactosamine:polypeptide N-acetylglucosaminyltransferase 2 (predicted) | Galnt2_predicted      | 9.91±0.98  |
| UDP-N-acetyl-alpha-D-galactosamine:polypeptide N-acetylglucosaminyltransferase 3             | Galnt3                | 1.04±0.19  |
| UDP-N-acetylglucosamine pyrophosphorylase 1-like 1 (predicted)                               | Uap111_predicted      | 11.41±1.75 |
| UFM1-specific peptidase 2                                                                    | Ufsp2                 | 6.71±0.76  |
| UHRF1 (ICBP90) binding protein 1-like                                                        | Uhrf1bp11             | 2.06±0.11  |
| unc-119 homolog B (C. elegans)                                                               | Unc119b               | 3.92±0.19  |
| unc-45 homolog A (C. elegans)                                                                | Unc45a                | 2.12±0.33  |
| unc-5 homolog C (C. elegans)-like                                                            | Unc5cl                | 4.39±0.25  |
| unc-50 homolog (C. elegans)                                                                  | Unc50                 | 5±0.76     |
| Unc-51 like kinase 1 (C. elegans)                                                            | ULK1                  | 0.55±0.16  |
| Unc-51 like kinase 2 (C. elegans) (predicted)                                                | ULK2_predicted        | 1.46±0.17  |
| unc-84 homolog B (C. elegans)                                                                | Unc84b                | 1.57±0.46  |
| unconventional SNARE in the ER 1 homolog (S. cerevisiae)                                     | LOC292282 /// Use1    | 4.51±0.57  |
| UPF3 regulator of nonsense transcripts homolog A (yeast)                                     | Upf3a                 | 1.4±0.15   |
| UPF3 regulator of nonsense transcripts homolog B (yeast) (predicted)                         | Upf3b_predicted       | 2.17±0.2   |
| upregulated during skeletal muscle growth 5                                                  | Usmg5                 | 49.86±2.57 |
| up-regulated gene 4                                                                          | Urg4                  | 1.36±0.13  |
| up-regulator of carnitine transporter, OCTN2                                                 | LOC303140             | 0.2±0.07   |
| upstream binding protein 1 (predicted)                                                       | Ubp1_predicted        | 1.61±0.3   |
| upstream binding transcription factor, RNA polymerase I                                      | Ubtf                  | 0.96±0.25  |
| upstream transcription factor 1                                                              | Usf1                  | 0.36±0.26  |
| upstream transcription factor 2                                                              | Usf2                  | 1.59±0.24  |
| uracil-DNA glycosylase                                                                       | Ung                   | 6.25±0.67  |
| ureidopropionase, beta                                                                       | Upb1                  | 14.21±1.12 |
| uridine monophosphate synthetase                                                             | Umps                  | 3.96±0.27  |
| uridine-cytidine kinase 1 (predicted)                                                        | Uck1_predicted        | 2.52±0.51  |
| uridine-cytidine kinase 1-like 1                                                             | Uck1l                 | 1.05±0.07  |
| uroporphyrinogen decarboxylase                                                               | Urod                  | 3.88±0.49  |
| uroporphyrinogen III synthase                                                                | Uros                  | 0.44±0.07  |
| Usher syndrome 1C homolog (human)                                                            | Ush1c                 | 7.29±1.06  |
| USO1 homolog, vesicle docking protein (yeast)                                                | Uso1                  | 5.1±0.66   |
| USP6 N-terminal like (predicted)                                                             | Usp6n1_predicted      | 0.45±0.19  |
| UTP14, U3 small nucleolar ribonucleoprotein, homolog A (yeast)                               | Utp14a                | 1.06±0.12  |
| UTP15, U3 small nucleolar ribonucleoprotein, homolog (yeast)                                 | Utp15                 | 0.5±0.14   |
| UTP18, small subunit (SSU) processome component, homolog (yeast)                             | Utp18                 | 1.55±0.1   |
| UTP20, small subunit (SSU) processome component, homolog (yeast)                             | Utp20                 | 0.66±0.14  |
| UTP3, small subunit (SSU) processome component, homolog (S. cerevisiae)                      | Utp3                  | 2.46±0.3   |
| UTP6, small subunit (SSU) processome component, homolog (yeast)                              | Utp6                  | 0.35±0.09  |
| Vac14 homolog (S. cerevisiae)                                                                | Vac14                 | 1.42±0.23  |
| vaccinia related kinase 1                                                                    | Vrk1                  | 0.54±0.13  |
| vaccinia related kinase 3                                                                    | Vrk3                  | 2.95±0.12  |
| vacuolar protein sorting 11 (yeast) (predicted)                                              | Vps11_predicted       | 1.69±0.13  |
| vacuolar protein sorting 13D (yeast) (predicted)                                             | Vps13d_predicted      | 0.58±0.1   |
| vacuolar protein sorting 16 (yeast)                                                          | Vps16                 | 1.19±0.15  |
| vacuolar protein sorting 18 (yeast) (predicted)                                              | Vps18_predicted       | 0.34±0.05  |
| vacuolar protein sorting 25 homolog (S. cerevisiae)                                          | Vps25                 | 6.78±0.62  |
| Vacuolar protein sorting 26 (yeast)                                                          | Vps26                 | 3.22±0.19  |
| vacuolar protein sorting 26 homolog A (yeast)                                                | Vps26a                | 2.56±0.33  |
| vacuolar protein sorting 26 homolog B (S. pombe)                                             | Vps26b                | 0.35±0.19  |
| vacuolar protein sorting 28 (yeast) (predicted)                                              | Vps28_predicted       | 6.37±0.25  |
| vacuolar protein sorting 29 (S. pombe) (predicted)                                           | Vps29_predicted       | 21.81±2.58 |
| vacuolar protein sorting 33A (yeast)                                                         | Vps33a                | 0.75±0.31  |
| vacuolar protein sorting 33B (yeast)                                                         | Vps33b                | 0.51±0.09  |
| vacuolar protein sorting 35                                                                  | Vps35                 | 21.84±0.52 |
| vacuolar protein sorting 36 (yeast) (predicted)                                              | Vps36_predicted       | 0.96±0.2   |
| vacuolar protein sorting 37 homolog A (S. cerevisiae)                                        | Vps37a                | 1.86±0.08  |
| vacuolar protein sorting 37B (yeast) (predicted)                                             | Vps37b_predicted      | 0.68±0.24  |
| vacuolar protein sorting 37C (yeast) (predicted)                                             | Vps37c_predicted      | 0.45±0.07  |
| vacuolar protein sorting 39 (yeast)                                                          | Vps39                 | 0.43±0.1   |
| vacuolar protein sorting 45 (yeast)                                                          | Vps45                 | 1.25±0.1   |
| vacuolar protein sorting 4a (yeast)                                                          | Vps4a                 | 3.28±0.3   |
| vacuolar protein sorting 4b (yeast)                                                          | Vps4b                 | 4.22±0.12  |

|                                                                                                                |                          |            |
|----------------------------------------------------------------------------------------------------------------|--------------------------|------------|
| vacuolar protein sorting 52 (yeast)                                                                            | Vps52                    | 0.39±0.1   |
| vacuolar protein sorting 53 (yeast) (predicted)                                                                | Vps53_predicted          | 1.42±0.31  |
| vacuolar protein sorting 54 (yeast)                                                                            | Vps54                    | 1.49±0.07  |
| vacuolar protein sorting 72 (yeast) (predicted)                                                                | Vps72_predicted          | 0.22±0.26  |
| vacuolar protein sorting 8 homolog (S. cerevisiae)                                                             | Vps8                     | 2.06±0.26  |
| valosin containing protein (p97)/p47 complex interacting protein 1                                             | Vcpip1                   | 1.13±0.03  |
| valosin-containing protein                                                                                     | Vcp                      | 14.86±0.75 |
| valyl-tRNA synthetase 2                                                                                        | Vars2                    | 0.24±0.21  |
| vang-like 1 (van gogh, Drosophila)                                                                             | Vangl1                   | 2.48±0.37  |
| vanin 1                                                                                                        | Vnn1                     | 9.86±0.13  |
| vascular endothelial growth factor A                                                                           | Vegfa                    | 2.59±0.45  |
| vascular endothelial growth factor B                                                                           | Vegfb                    | 3.82±0.24  |
| vascular endothelial growth factor C                                                                           | Vegfc                    | 0.61±0.21  |
| vascular endothelial zinc finger 1 (predicted)                                                                 | VeZF1_predicted          | 1.52±0.17  |
| VATPase, H+ transporting, lysosomal V1 subunit E1                                                              | Atp6v1e1                 | 13.8±0.86  |
| vav 3 oncogene                                                                                                 | Vav3                     | 0.43±0.39  |
| Vav2 oncogene (predicted)                                                                                      | Vav2_predicted           | 0.95±0.06  |
| ventricular zone expressed PH domain homolog 1 (zebrafish) /// similar to VEPH isoform A (predicted)           | RGD1565184_predicted /// | 0.58±0.03  |
| v-erb-b2 erythroblastic leukemia viral oncogene homolog 2, neuro/glioblastoma derived oncogene homolog (avian) | Vepb1                    |            |
| very low density lipoprotein receptor                                                                          | ErbB2                    | 0.78±0.11  |
| vesicle amine transport protein 1 homolog (T. californica)                                                     | Vldlr                    | 3.92±0.09  |
| vesicle transport through interaction with t-SNAREs homolog 1A (yeast)                                         | Vat1                     | 0.99±0.72  |
| vesicle-associated membrane protein 2                                                                          | Vti1a                    | 0.36±0.05  |
| vesicle-associated membrane protein 3                                                                          | Vamp2                    | 0.69±0.07  |
| vesicle-associated membrane protein 4 (predicted)                                                              | Vamp3                    | 5.86±0.33  |
| vesicle-associated membrane protein 7                                                                          | Vamp4_predicted          | 0.39±0.13  |
| vesicle-associated membrane protein 8                                                                          | Vamp7                    | 5.3±0.63   |
| vesicle-associated membrane protein, associated protein a                                                      | Vamp8                    | 6.82±1.52  |
| vesicle-associated membrane protein, associated protein B and C                                                | Vapa                     | 19.05±1.76 |
| vestigial like 4 (Drosophila)                                                                                  | Vapb                     | 4.35±0.72  |
| villin 1 (predicted)                                                                                           | Vgll4                    | 0.48±0.19  |
| villin 2                                                                                                       | Vil1_predicted           | 11.23±1.16 |
| villin-like (predicted)                                                                                        | Vil2                     | 27.35±0.64 |
| vinculin (predicted)                                                                                           | Vill_predicted           | 5.07±1.07  |
| virus-induced signaling adapter                                                                                | Vcl_predicted            | 1.5±0.52   |
| vitamin D receptor                                                                                             | Visa                     | 0.62±0.05  |
| vitamin K epoxide reductase complex, subunit 1                                                                 | Vdr                      | 0.29±0.1   |
| vitamin K epoxide reductase complex, subunit 1-like 1                                                          | Vkorc1                   | 11.89±1.49 |
| v-Ki-ras2 Kirsten rat sarcoma viral oncogene homolog                                                           | Vkorc111                 | 1.2±0.21   |
| v-maf musculoaponeurotic fibrosarcoma oncogene family, protein G (avian)                                       | Kras                     | 3.39±0.25  |
| v-maf musculoaponeurotic fibrosarcoma oncogene family, protein K (avian)                                       | Mafg                     | 0.33±0.1   |
| v-maf musculoaponeurotic fibrosarcoma oncogene homolog (avian)                                                 | Mafk                     | 0.51±0.09  |
| voltage-dependent anion channel 1                                                                              | Maf                      | 5.99±1.62  |
| voltage-dependent anion channel 2                                                                              | Vdac1                    | 26.64±2.25 |
| voltage-dependent anion channel 3                                                                              | Vdac2                    | 26.07±1.03 |
| von Hippel-Lindau tumor suppressor                                                                             | Vdac3                    | 22.89±3.27 |
| von Willebrand factor A domain containing 1                                                                    | Vhl                      | 3.91±0.26  |
| Vps20-associated 1 homolog (S. cerevisiae)                                                                     | Vwa1                     | 0.49±0.16  |
| v-raf murine sarcoma 3611 viral oncogene homolog                                                               | Vta1                     | 3.57±0.13  |
| v-raf-1 murine leukemia viral oncogene homolog 1                                                               | Araf                     | 2.38±0.39  |
| v-ral simian leukemia viral oncogene homolog A (ras related)                                                   | Raf1                     | 3.2±0.31   |
| v-ral simian leukemia viral oncogene homolog B (ras related)                                                   | Rala                     | 1.5±0.19   |
| v-rel reticuloendotheliosis viral oncogene homolog A (avian)                                                   | Ralb                     | 2.91±0.41  |
| WAS protein homology region 2 domain containing 1                                                              | Rela                     | 0.46±0.4   |
| WAS/WASL interacting protein family, member 1                                                                  | Whdc1                    | 0.32±0.1   |
| WASP family 1                                                                                                  | Wipf1                    | 0.5±0.33   |
| WD and tetratricopeptide repeats 1 (predicted)                                                                 | Wasf1                    | 0.62±0.08  |
| WD repeat and FYVE domain containing 1                                                                         | Wdtd1_predicted          | 1.62±0.33  |
| WD repeat and FYVE domain containing 2 (predicted)                                                             | Wdfy1                    | 6.24±0.84  |
| WD repeat and FYVE domain containing 3 (predicted)                                                             | Wdfy2_predicted          | 1.75±0.29  |
| WD repeat and SOCS box-containing 1                                                                            | Wdfy3_predicted          | 10.84±0.39 |
| WD repeat and SOCS box-containing 2                                                                            | Wsb1                     | 3.89±0.87  |
| WD repeat domain 1                                                                                             | Wsb2                     | 5.02±0.25  |
| WD repeat domain 12                                                                                            | Wdr1                     | 7.51±0.48  |
| WD repeat domain 13 (predicted)                                                                                | Wdr12                    | 0.95±0.13  |
| WD repeat domain 18                                                                                            | Wdr13_predicted          | 1.58±0.24  |
| WD repeat domain 19 (predicted)                                                                                | Wdr18                    | 0.86±0.13  |
| WD repeat domain 20                                                                                            | Wdr19_predicted          | 0.47±0.06  |
| WD repeat domain 20a                                                                                           | Wdr20                    | 0.31±0.1   |
| WD repeat domain 21 (predicted)                                                                                | Wdr20a                   | 0.43±0.05  |
| WD repeat domain 23                                                                                            | Wdr21_predicted          | 0.71±0.06  |
| WD repeat domain 24                                                                                            | Wdr23                    | 7.43±1.88  |
| WD repeat domain 25 /// similar to pre-mRNA splicing factor-like (predicted)                                   | Wdr24                    | 0.83±0.25  |
|                                                                                                                | RGD1562505_predicted /// | 0.2±0.04   |
|                                                                                                                | Wdr25                    |            |
| WD repeat domain 26                                                                                            | Wdr26                    | 3.5±0.33   |
| WD repeat domain 3 (predicted)                                                                                 | Wdr3_predicted           | 0.96±0.14  |
| WD repeat domain 31                                                                                            | Wdr31                    | 0.47±0.1   |
| WD repeat domain 32 (predicted)                                                                                | Wdr32_predicted          | 0.43±0.07  |
| WD repeat domain 33 (predicted)                                                                                | Wdr33_predicted          | 0.96±0.45  |
| WD repeat domain 34                                                                                            | Wdr34                    | 0.4±0.03   |
| WD repeat domain 36 (predicted)                                                                                | Wdr36_predicted          | 1.73±0.13  |
| WD repeat domain 37 (predicted)                                                                                | Wdr37_predicted          | 1.5±0.15   |
| WD repeat domain 41 (predicted)                                                                                | Wdr41_predicted          | 0.45±0.08  |
| WD repeat domain 42A                                                                                           | Wdr42a                   | 1.07±0.22  |
| WD repeat domain 43                                                                                            | Wdr43                    | 0.69±0.08  |
| WD repeat domain 44                                                                                            | Wdr44                    | 0.29±0.06  |

|                                                                                                          |                       |            |
|----------------------------------------------------------------------------------------------------------|-----------------------|------------|
| WD repeat domain 45                                                                                      | Wdr45                 | 2.47±0.26  |
| WD repeat domain 47                                                                                      | Wdr47                 | 0.33±0.13  |
| WD repeat domain 48 (predicted)                                                                          | Wdr48_predicted       | 0.64±0.2   |
| WD repeat domain 5                                                                                       | Wdr5                  | 0.96±0.19  |
| WD repeat domain 51A                                                                                     | Wdr51a                | 0.53±0.09  |
| WD repeat domain 55                                                                                      | Wdr55                 | 0.26±0.15  |
| WD repeat domain 5B                                                                                      | Wdr5b                 | 0.27±0.07  |
| WD repeat domain 6                                                                                       | Wdr6                  | 2.11±0.52  |
| WD repeat domain 61                                                                                      | Wdr61                 | 5.37±0.16  |
| WD repeat domain 67                                                                                      | Wdr67                 | 1.52±0.12  |
| WD repeat domain 68 (predicted)                                                                          | Wdr68_predicted       | 2.81±0.4   |
| WD repeat domain 70                                                                                      | Wdr70                 | 0.44±0.08  |
| WD repeat domain 75                                                                                      | Wdr75                 | 0.56±0.26  |
| WD repeat domain 77                                                                                      | Wdr77                 | 2.61±0.36  |
| WD repeat domain 79                                                                                      | Wdr79                 | 0.7±0.1    |
| WD repeat domain 81                                                                                      | Wdr81                 | 1.95±0.3   |
| WD repeat domain 89                                                                                      | Wdr89                 | 1.34±0.14  |
| WD repeat domain 91                                                                                      | Wdr91                 | 1.32±0.31  |
| WD repeat domain, phosphoinositide interacting 1 (predicted)                                             | Wipi1_predicted       | 3.52±0.55  |
| WD repeat domain, phosphoinositide interacting 2                                                         | Wipi2                 | 1.72±0.2   |
| WD repeat, SAM and U-box domain containing 1                                                             | Wdsub1                | 0.96±0.13  |
| WD repeats and SOF domain containing 1 (predicted)                                                       | Wdsof1_predicted      | 2.68±0.38  |
| Wdr45 like (predicted)                                                                                   | Wdr45l_predicted      | 3.87±0.49  |
| wee 1 homolog (S. pombe)                                                                                 | Wee1                  | 0.43±0.12  |
| Werner helicase interacting protein 1                                                                    | Wrnip1                | 0.92±0.16  |
| widely-interspaced zinc finger motifs (predicted)                                                        | Wiz_predicted         | 0.84±0.05  |
| Williams Beuren syndrome chromosome region 22                                                            | LOC368084 /// Wbscr22 | 1.25±0.09  |
| Williams-Beuren syndrome chromosome region 16 homolog (human) (predicted)                                | Wbscr16_predicted     | 0.82±0.19  |
| Williams-Beuren syndrome chromosome region 18 /// similar to Williams-Beuren syndrome critical region 18 | LOC680976 /// Wbscr18 | 2.74±0.06  |
| Wilms' tumour 1-associating protein                                                                      | Wtap                  | 3.76±0.51  |
| wingless related MMTV integration site 2b                                                                | Wnt2b                 | 0.3±0.18   |
| Wiskott-Aldrich syndrome-like (human)                                                                    | Wasl                  | 4.06±0.22  |
| Wolf-Hirschhorn syndrome candidate 1 (human)                                                             | Whsc1                 | 0.27±0.12  |
| Wolf-Hirschhorn syndrome candidate 1-like 1 (predicted)                                                  | Whsc111_predicted     | 0.92±0.07  |
| Wolf-Hirschhorn syndrome candidate 2 (human)                                                             | Whsc2                 | 0.8±0.02   |
| WW domain binding protein 1                                                                              | Wbp1                  | 2.36±0.2   |
| WW domain binding protein 11                                                                             | Wbp11                 | 0.86±0.29  |
| WW domain binding protein 2                                                                              | Wbp2                  | 4.65±0.28  |
| WW domain binding protein 4                                                                              | Wbp4                  | 1.22±0.27  |
| WW domain binding protein 5 (predicted)                                                                  | Wbp5_predicted        | 8.18±1.83  |
| WW domain binding protein 7                                                                              | Wbp7                  | 0.31±0.09  |
| WW domain containing E3 ubiquitin protein ligase 1                                                       | Wwp1                  | 1.6±0.39   |
| WW domain containing E3 ubiquitin protein ligase 2 (predicted)                                           | Wwp2_predicted        | 1.25±0.17  |
| WW domain containing transcription regulator 1                                                           | Wwtr1                 | 0.93±0.17  |
| WW, C2 and coiled-coil domain containing 1                                                               | Wwc1                  | 5.19±0.61  |
| WW, C2 and coiled-coil domain containing 2                                                               | Wwc2                  | 3.99±0.08  |
| X Kell blood group precursor-related family, member 5                                                    | Xkr5                  | 0.23±0.09  |
| xanthine dehydrogenase                                                                                   | Xdh                   | 21.99±3.2  |
| X-box binding protein 1                                                                                  | Xbp1                  | 4.99±1.19  |
| Xenotropic and polytropic retrovirus receptor 1 (predicted)                                              | Xpr1_predicted        | 5.24±0.31  |
| xeroderma pigmentosum, complementation group A (predicted)                                               | Xpa_predicted         | 0.7±0.03   |
| xeroderma pigmentosum, complementation group C (predicted)                                               | Xpc_predicted         | 1.93±0.12  |
| X-linked myotubular myopathy gene 1                                                                      | Mtm1                  | 0.35±0.08  |
| XPA binding protein 2                                                                                    | Xab2                  | 0.77±0.34  |
| X-prolyl aminopeptidase (aminopeptidase P) 1, soluble                                                    | Xpnpep1               | 13.35±2.37 |
| X-prolyl aminopeptidase (aminopeptidase P) 2, membrane-bound                                             | Xpnpep2               | 14.51±0.65 |
| X-ray repair complementing defective repair in Chinese hamster cells 1                                   | Xrcc1                 | 0.41±0.16  |
| X-ray repair complementing defective repair in Chinese hamster cells 4                                   | Xrcc4                 | 0.79±0.05  |
| X-ray repair complementing defective repair in Chinese hamster cells 5                                   | Xrcc5                 | 2.86±0.49  |
| X-ray repair complementing defective repair in Chinese hamster cells 6                                   | Xrcc6                 | 0.26±0.08  |
| XRCC6 binding protein 1                                                                                  | Xrcc6bp1              | 1.46±0.29  |
| XTP3-transactivated protein A                                                                            | Xtp3tpa               | 0.75±0.15  |
| xylosyltransferase II                                                                                    | Xylt2                 | 0.7±0.27   |
| xylulokinase homolog (H. influenzae)                                                                     | Xylb                  | 30.17±2.64 |
| Y box protein 1                                                                                          | Ybx1                  | 19.37±1.73 |
| YEATS domain containing 2                                                                                | Yeats2                | 1.91±0.23  |
| YEATS domain containing 4 (predicted)                                                                    | Yeats4_predicted      | 1.7±0.05   |
| Yip1 domain family, member 1                                                                             | Yipf1                 | 4.02±0.64  |
| Yip1 domain family, member 2                                                                             | Yipf2                 | 0.43±0.02  |
| Yip1 domain family, member 3                                                                             | Yipf3                 | 1.04±0.35  |
| Yip1 domain family, member 4                                                                             | Yipf4                 | 4.45±0.29  |
| Yip1 domain family, member 5                                                                             | Yipf5                 | 10.99±1.28 |
| Yip1 interacting factor homolog (S. cerevisiae)                                                          | Yif1                  | 4.13±0.34  |
| yippee-like 5 (Drosophila)                                                                               | Ypel5                 | 7.82±0.59  |
| YKT6 homolog (S. Cerevisiae)                                                                             | Ykt6                  | 0.31±0.07  |
| YME1-like 1 (S. cerevisiae)                                                                              | Yme11                 | 7.85±1.01  |
| yrdC domain containing (E.coli)                                                                          | Yrdc                  | 0.44±0.15  |
| YTH domain family 1                                                                                      | Ythdf1                | 1.96±0.07  |
| YTH domain family 2 (predicted)                                                                          | Ythdf2_predicted      | 1.85±0.13  |
| YTH domain family 3 (predicted)                                                                          | Ythdf3_predicted      | 4.24±0.27  |
| YY1 transcription factor                                                                                 | Yy1                   | 10.74±0.89 |
| zer-1 homolog (C. elegans)                                                                               | Zer1                  | 0.88±0.16  |
| zeta-chain (TCR) associated protein kinase 70                                                            | Zap70                 | 0.2±0.03   |
| zinc and ring finger 1 (predicted)                                                                       | Znrf1_predicted       | 5.48±1.04  |
| zinc binding alcohol dehydrogenase, domain containing 1                                                  | Zadh1                 | 5.63±0.58  |
| zinc binding alcohol dehydrogenase, domain containing 2 (predicted)                                      | Zadh2_predicted       | 1.23±0.06  |
| zinc finger (CCCH type), RNA binding motif and serine/arginine rich 1                                    | Zrsr1                 | 0.43±0.06  |

|                                                                                   |                                                 |            |
|-----------------------------------------------------------------------------------|-------------------------------------------------|------------|
| zinc finger (CCCH type), RNA binding motif and serine/arginine rich 2             | Zrsr2                                           | 0.36±0.14  |
| zinc finger and BTB domain containing 1                                           | Zbtb1                                           | 0.4±0.2    |
| zinc finger and BTB domain containing 11 (predicted)                              | Zbtb11_predicted                                | 1.93±0.14  |
| zinc finger and BTB domain containing 17                                          | Zbtb17                                          | 0.6±0.26   |
| zinc finger and BTB domain containing 2 (predicted)                               | Zbtb2_predicted                                 | 0.42±0.16  |
| zinc finger and BTB domain containing 20 (predicted)                              | Zbtb20_predicted                                | 4.2±1.19   |
| zinc finger and BTB domain containing 24 (predicted)                              | Zbtb24_predicted                                | 0.25±0.08  |
| zinc finger and BTB domain containing 4 (predicted)                               | Zbtb4_predicted                                 | 0.86±0.22  |
| zinc finger and BTB domain containing 41 homolog                                  | Zbtb41                                          | 0.83±0.17  |
| zinc finger and BTB domain containing 43                                          | Zbtb43                                          | 0.95±0.18  |
| zinc finger and BTB domain containing 44                                          | Zbtb44                                          | 0.48±0.02  |
| zinc finger and BTB domain containing 45                                          | Zbtb45                                          | 0.39±0.13  |
| zinc finger and BTB domain containing 5 (predicted)                               | Zbtb5_predicted                                 | 0.75±0.11  |
| zinc finger and BTB domain containing 6                                           | Zbtb6                                           | 0.23±0.07  |
| zinc finger and BTB domain containing 7a                                          | Zbtb7a                                          | 0.49±0.15  |
| zinc finger and BTB domain containing 8 opposite strand (predicted)               | Zbtb8os_predicted                               | 3.36±0.37  |
| zinc finger and SCAN domain containing 21                                         | Zscan21                                         | 0.55±0.12  |
| zinc finger and SCAN domains 20                                                   | Zscan20                                         | 0.61±0.1   |
| zinc finger CCCH type containing 13                                               | Zc3h13                                          | 0.71±0.12  |
| zinc finger CCCH type containing 14                                               | Zc3h14                                          | 3.65±0.41  |
| zinc finger CCCH type containing 6 (predicted)                                    | Zc3h6_predicted                                 | 0.24±0.07  |
| zinc finger CCCH type containing 7 A (predicted)                                  | Zc3h7a_predicted                                | 1.35±0.14  |
| zinc finger CCCH type containing 8                                                | Zc3h8                                           | 1.07±0.21  |
| zinc finger CCCH-type containing 15                                               | Zc3h15                                          | 6.16±0.07  |
| zinc finger CCCH-type containing 7B (predicted)                                   | Zc3h7b_predicted                                | 1.58±0.18  |
| zinc finger CCHC-type and RNA binding motif 1                                     | Zcrb1                                           | 1.43±0.09  |
| zinc finger protein 105                                                           | Zfp105                                          | 0.6±0.08   |
| zinc finger protein 110                                                           | Zfp110                                          | 2.1±0.16   |
| zinc finger protein 124 (HZF-16) (predicted)                                      | Znf124_predicted                                | 0.33±0.02  |
| zinc finger protein 131                                                           | Zfp131                                          | 0.74±0.27  |
| zinc finger protein 143                                                           | Zfp143                                          | 0.67±0.11  |
| zinc finger protein 148                                                           | Zfp148                                          | 2.48±0.11  |
| zinc finger protein 157                                                           | Zfp157                                          | 0.54±0.02  |
| zinc finger protein 161                                                           | Zfp161                                          | 0.24±0.03  |
| zinc finger protein 180                                                           | Zfp180                                          | 2.37±0.43  |
| zinc finger protein 189 (predicted)                                               | Zfp189_predicted                                | 0.32±0.18  |
| zinc finger protein 191                                                           | Zfp191                                          | 0.61±0.08  |
| zinc finger protein 207                                                           | Zfp207                                          | 3.04±0.31  |
| Zinc finger protein 212                                                           | Zfp212                                          | 1±0.41     |
| zinc finger protein 213 (predicted)                                               | Znf213_predicted                                | 0.38±0.02  |
| zinc finger protein 213 (predicted) /// similar to Caspase-14 precursor (CASP-14) | LOC679178 /// LOC680728<br>/// Znf213_predicted | 0.33±0.02  |
| zinc finger protein 219                                                           | Zfp219                                          | 0.65±0.32  |
| zinc finger protein 259                                                           | Zfp259                                          | 1.01±0.44  |
| zinc finger protein 260                                                           | Zfp260                                          | 2.07±0.2   |
| zinc finger protein 275 (predicted)                                               | Zfp275_predicted                                | 0.54±0.17  |
| zinc finger protein 278                                                           | Zfp278                                          | 0.71±0.17  |
| zinc finger protein 281                                                           | Zfp281                                          | 2.54±0.36  |
| zinc finger protein 289                                                           | Zfp289                                          | 2.73±0.33  |
| zinc finger protein 291                                                           | Znf291                                          | 0.43±0.11  |
| zinc finger protein 292                                                           | Zfp292                                          | 0.88±0.14  |
| zinc finger protein 294                                                           | Zfp294                                          | 3.02±0.55  |
| zinc finger protein 297                                                           | Zfp297                                          | 0.46±0.07  |
| zinc finger protein 313                                                           | Zfp313                                          | 0.73±0.12  |
| zinc finger protein 316 (predicted)                                               | Zfp316_predicted                                | 0.32±0.11  |
| zinc finger protein 329 (predicted)                                               | Zfp329_predicted                                | 0.4±0.05   |
| zinc finger protein 330 (predicted)                                               | Zfp330_predicted                                | 4.21±0.58  |
| zinc finger protein 335                                                           | Zfp335                                          | 0.43±0.19  |
| zinc finger protein 346 (predicted)                                               | Zfp346_predicted                                | 0.77±0.14  |
| zinc finger protein 347                                                           | Zfp347                                          | 0.71±0.13  |
| zinc finger protein 354A                                                          | Zfp354a                                         | 15.77±2.85 |
| zinc finger protein 358 (predicted)                                               | Zfp358_predicted                                | 0.87±0.16  |
| zinc finger protein 36                                                            | Zfp36                                           | 1.57±0.91  |
| zinc finger protein 36, C3H type-like 1                                           | Zfp36l1                                         | 7.34±2.18  |
| zinc finger protein 36, C3H type-like 2                                           | Zfp36l2                                         | 0.94±0.73  |
| zinc finger protein 362 /// zinc finger and SCAN domains 20                       | Zfp362 /// Zscan20                              | 7.48±1.38  |
| zinc finger protein 364 (predicted)                                               | Zfp364_predicted                                | 5.01±0.15  |
| zinc finger protein 367                                                           | Zfp367                                          | 0.27±0.15  |
| zinc finger protein 384                                                           | Zfp384                                          | 2.58±0.25  |
| zinc finger protein 386 (Kruppel-like)                                            | Zfp386                                          | 2.27±0.58  |
| zinc finger protein 395 (predicted)                                               | Zfp395_predicted                                | 1.09±0.33  |
| zinc finger protein 407                                                           | Zfp407                                          | 0.36±0.05  |
| zinc finger protein 410 (predicted)                                               | Zfp410_predicted                                | 1.78±0.36  |
| zinc finger protein 414                                                           | Zfp414                                          | 0.62±0.34  |
| zinc finger protein 422                                                           | Zfp422                                          | 1.21±0.05  |
| zinc finger protein 444 (predicted)                                               | Zfp444_predicted                                | 0.2±0.13   |
| zinc finger protein 445                                                           | Zfp445                                          | 1.25±0.14  |
| zinc finger protein 446 (predicted)                                               | Zfp446_predicted                                | 0.35±0.05  |
| zinc finger protein 451                                                           | Zfp451                                          | 0.44±0.04  |
| zinc finger protein 455                                                           | Zfp455                                          | 0.76±0.08  |
| zinc finger protein 46 (predicted)                                                | Zfp46_predicted                                 | 0.59±0.26  |
| zinc finger protein 462                                                           | Zfp462                                          | 1.34±0.11  |
| zinc finger protein 467                                                           | Zfp467                                          | 0.2±0.11   |
| zinc finger protein 469 (predicted)                                               | Zfp469_predicted                                | 1.52±0.19  |
| zinc finger protein 503 (predicted)                                               | Zfp503_predicted                                | 13.48±2.16 |
| Zinc finger protein 507 (predicted)                                               | Znf507_predicted                                | 0.98±0.03  |



|                                                     |                   |           |
|-----------------------------------------------------|-------------------|-----------|
| zinc finger protein 511                             | Zfp511            | 0.65±0.08 |
| zinc finger protein 512                             | Zfp512            | 0.45±0.09 |
| zinc finger protein 512B                            | Znf512b           | 0.7±0.17  |
| zinc finger protein 513                             | Zfp513            | 1.42±0.17 |
| zinc finger protein 524                             | Zfp524            | 1.08±0.1  |
| zinc finger protein 533 (predicted)                 | Zfp533_predicted  | 0.62±0.28 |
| zinc finger protein 541                             | Zfp541            | 0.83±0.19 |
| zinc finger protein 553 /// zinc finger protein 771 | Zfp553 /// Zfp771 | 2.09±0.55 |
| zinc finger protein 574                             | Zfp574            | 0.48±0.13 |
| zinc finger protein 580 (predicted)                 | Zfp580_predicted  | 0.28±0.18 |
| zinc finger protein 592 (predicted)                 | Zfp592_predicted  | 0.56±0.07 |
| zinc finger protein 598 (predicted)                 | Zfp598_predicted  | 0.96±0.25 |
| zinc finger protein 609                             | Zfp609            | 0.52±0.15 |
| zinc finger protein 61                              | Zfp61             | 0.46±0.14 |
| zinc finger protein 612 (predicted)                 | Zfp612_predicted  | 0.24±0.09 |
| zinc finger protein 618 (predicted)                 | Znf618_predicted  | 0.39±0.15 |
| zinc finger protein 622                             | Zfp622            | 0.93±0.06 |
| Zinc finger protein 637                             | Zfp637            | 1.28±0.14 |
| zinc finger protein 644 (predicted)                 | Zfp644_predicted  | 1.54±0.06 |
| zinc finger protein 653 (predicted)                 | Zfp653_predicted  | 0.59±0.05 |
| zinc finger protein 654                             | Zfp654            | 1.03±0.09 |
| zinc finger protein 655                             | Zfp655            | 3.65±0.38 |
| zinc finger protein 667                             | Zfp667            | 0.34±0.07 |
| zinc finger protein 672                             | Zfp672            | 0.89±0.11 |
| zinc finger protein 68 (predicted)                  | Zfp68_predicted   | 1.16±0.29 |
| zinc finger protein 688 (predicted)                 | Zfp688_predicted  | 0.58±0.07 |
| zinc finger protein 692 (predicted)                 | Zfp692_predicted  | 0.37±0.01 |
| zinc finger protein 706                             | Zfp706            | 9.4±0.65  |
| zinc finger protein 709                             | Zfp709            | 0.22±0.16 |
| zinc finger protein 771                             | Zfp771            | 0.37±0.14 |
| zinc finger protein 777                             | Zfp777            | 0.23±0.16 |
| zinc finger protein 787                             | Zfp787            | 1.37±0.03 |
| zinc finger protein 821                             | Zfp821            | 0.33±0.2  |
| zinc finger protein 828                             | Zfp828            | 0.9±0.11  |
| zinc finger protein 84 (predicted)                  | Zfp84_predicted   | 0.43±0.12 |
| zinc finger protein 91                              | Zfp91             | 3.86±0.17 |
| zinc finger protein X-linked (predicted)            | Zfx_predicted     | 0.68±0.12 |
| zinc finger protein ZFP                             | LOC503192         | 1.05±0.13 |
| zinc finger RNA binding protein                     | Zfr               | 5.38±0.76 |
| zinc finger with KRAB and SCAN domains 1            | Zkscan1           | 0.76±0.06 |
| zinc finger with KRAB and SCAN domains 17           | Zkscan17          | 1.66±0.21 |
| zinc finger with KRAB and SCAN domains 3            | Zkscan3           | 1.88±0.05 |
| zinc finger with KRAB and SCAN domains 5            | Zkscan5           | 0.85±0.19 |
| zinc finger with KRAB and SCAN domains 6            | Zkscan6           | 0.31±0.09 |
| zinc finger with UFM1-specific peptidase domain     | Zufsp             | 0.81±0.07 |
| zinc finger, AN1-type domain 1                      | Zfand1            | 0.97±0.08 |
| zinc finger, AN1-type domain 3                      | Zfand3            | 3.52±0.42 |
| zinc finger, AN1-type domain 5                      | Zfand5            | 2.5±0.53  |
| zinc finger, AN1-type domain 6                      | Zfand6            | 9.5±0.41  |
| zinc finger, BED domain containing 3                | Zbed3             | 2.1±0.49  |
| zinc finger, BED domain containing 4 (predicted)    | Zbed4_predicted   | 0.72±0.14 |
| zinc finger, C3HC-type 1 (predicted)                | Zc3hc1_predicted  | 0.36±0.18 |
| zinc finger, CCCH-type with G patch domain          | Zgpat             | 0.31±0.04 |
| zinc finger, CCHC domain containing 10              | Zcchc10           | 0.59±0.13 |
| zinc finger, CCHC domain containing 11 (predicted)  | Zcchc11_predicted | 0.65±0.16 |
| Zinc finger, CCHC domain containing 7 (predicted)   | Zcchc7_predicted  | 0.85±0.09 |
| zinc finger, CCHC domain containing 9               | Zcchc9            | 1.83±0.12 |
| zinc finger, DHHC domain containing 1               | Zdhhc1            | 0.61±0.35 |
| zinc finger, DHHC domain containing 13              | Zdhhc13           | 0.93±0.31 |
| zinc finger, DHHC domain containing 16              | Zdhhc16           | 2.46±0.03 |
| zinc finger, DHHC domain containing 2               | Zdhhc2            | 1.06±0.22 |
| zinc finger, DHHC domain containing 23              | Zdhhc23           | 0.73±0.19 |
| Zinc finger, DHHC domain containing 3               | Zdhhc3            | 7.39±0.31 |
| zinc finger, DHHC domain containing 4               | Zdhhc4            | 2.06±0.11 |
| zinc finger, DHHC domain containing 5               | Zdhhc5            | 2.33±0.24 |
| zinc finger, DHHC domain containing 6               | Zdhhc6            | 2.4±0.2   |
| zinc finger, DHHC domain containing 7               | Zdhhc7            | 1.78±0.62 |
| zinc finger, DHHC domain containing 9               | Zdhhc9            | 8.15±1.18 |
| zinc finger, DHHC-type containing 22                | Zdhhc22           | 0.25±0.08 |
| zinc finger, FYVE domain containing 1 (predicted)   | Zfyve1_predicted  | 0.57±0.22 |
| zinc finger, FYVE domain containing 16              | Zfyve16           | 1.19±0.16 |
| zinc finger, FYVE domain containing 20 (predicted)  | Zfyve20_predicted | 0.68±0.02 |
| zinc finger, FYVE domain containing 21 (predicted)  | Zfyve21_predicted | 7.57±0.07 |
| zinc finger, FYVE domain containing 26 (predicted)  | Zfyve26_predicted | 1.64±0.04 |
| zinc finger, FYVE domain containing 27              | Zfyve27           | 0.4±0.07  |
| zinc finger, HIT domain containing 1 (predicted)    | Znhit1_predicted  | 4.16±0.75 |
| zinc finger, HIT domain containing 2 (predicted)    | Znhit2_predicted  | 0.7±0.03  |
| zinc finger, HIT type 3                             | Znhit3            | 1.21±0.14 |
| zinc finger, matrin type 2                          | Zmat2             | 0.93±0.21 |
| zinc finger, matrin type 3                          | Zmat3             | 0.65±0.22 |
| zinc finger, matrin-like (predicted)                | Zfml_predicted    | 2.2±0.36  |
| zinc finger, MIZ-type containing 1                  | Zmiz1             | 0.75±0.77 |
| zinc finger, MIZ-type containing 2                  | Zmiz2             | 0.43±0.34 |
| zinc finger, MYM domain containing 1 (predicted)    | Zmym1_predicted   | 0.71±0.12 |
| zinc finger, MYM-type 2                             | Zmym2             | 2.59±0.09 |
| zinc finger, MYM-type 3                             | Zmym3             | 0.23±0.1  |
| zinc finger, MYM-type 4 (predicted)                 | Zmym4_predicted   | 0.77±0.04 |

|                                                                   |                    |            |
|-------------------------------------------------------------------|--------------------|------------|
| zinc finger, MYM-type 6                                           | Zmym6              | 1.37±0.22  |
| zinc finger, MYND domain containing 11                            | Zmynd11            | 3.97±0.46  |
| zinc finger, MYND domain containing 15 (predicted)                | Zmynd15_predicted  | 0.8±0.11   |
| zinc finger, RAN-binding domain containing 2                      | Zranb2             | 5.57±0.29  |
| zinc finger, SWIM domain containing 1 (predicted)                 | Zswim1_predicted   | 0.81±0.17  |
| zinc finger, SWIM domain containing 3 (predicted)                 | Zswim3_predicted   | 0.21±0.05  |
| zinc finger, SWIM domain containing 4 (predicted)                 | Zswim4_predicted   | 0.48±0.19  |
| zinc finger, SWIM domain containing 5 (predicted)                 | Zswim5_predicted   | 0.81±0.22  |
| Zinc finger, ZZ-type with EF hand domain 1 (predicted)            | Zzef1_predicted    | 0.87±0.07  |
| Zinc fingers and homeoboxes 2                                     | Zhx2               | 2.55±0.38  |
| zinc fingers and homeoboxes protein 1                             | Zhx1               | 1.54±0.18  |
| Zinc metalloproteinase, STE24 homolog (S. cerevisiae) (predicted) | Zmpste24_predicted | 4.58±0.51  |
| zinc ribbon domain containing, 1                                  | Znrd1              | 1.64±0.16  |
| ZUBR1                                                             | Rbaf600            | 1.32±0.24  |
| ZW10 homolog (Drosophila), centromere/kinetochore protein         | Zw10               | 1.09±0.06  |
| ZW10 interactor                                                   | Zwint              | 12.09±1.06 |
| Zwisch, kinetochore associated, homolog (Drosophila)              | Zwilch             | 0.32±0.02  |
| ZXD family zinc finger C                                          | Zxdc               | 0.39±0.09  |
| zyxin                                                             | Zyx                | 0.88±0.13  |
