# Supplementary material
Source: PubMed Central journal article supplement (PMC2650175)
Supplement: 0813002106_ST4_PDF.pdf [file 0813002106_ST4_PDF.pdf]

Table S4. Rat Kidney Medullary Thick Ascending Limb Transcriptome

| Gene Title                                                                                                                            | Gene Symbol          | Signal     |
|---------------------------------------------------------------------------------------------------------------------------------------|----------------------|------------|
| 1-acylglycerol-3-phosphate O-acyltransferase 2 (lysophosphatidic acid acyltransferase, beta) (predicted)                              | Agpat2_predicted     | 4.83±0.59  |
| 1-acylglycerol-3-phosphate O-acyltransferase 3 (predicted)                                                                            | Agpat3_predicted     | 2.57±0.34  |
| 1-acylglycerol-3-phosphate O-acyltransferase 5 (lysophosphatidic acid acyltransferase, epsilon) (predicted)                           | Agpat5_predicted     | 1.73±0.32  |
| 1-acylglycerol-3-phosphate O-acyltransferase 6 (lysophosphatidic acid acyltransferase, zeta)                                          | Agpat6               | 5.21±1.04  |
| 1-aminocyclopropane-1-carboxylate synthase homolog (Arabidopsis)(non-functional)                                                      | Accs / LOC690470     | 1.4±0.31   |
| 2'-5' oligoadenylate synthetase 11                                                                                                    | Oas1i                | 0.25±0.26  |
| 2,3-bisphosphoglycerate mutase                                                                                                        | Bpgm                 | 2.13±0.78  |
| 2',3'-cyclic nucleotide 3' phosphodiesterase                                                                                          | Cnp                  | 1±0.06     |
| 2,4-dienoyl CoA reductase 1, mitochondrial                                                                                            | Decr1                | 4.64±1.18  |
| 24-dehydrocholesterol reductase                                                                                                       | Dhcr24               | 7.6±2.36   |
| 2-4-dienoyl-Coenzyme A reductase 2, peroxisomal                                                                                       | Decr2                | 1.11±0.16  |
| 2'-5' oligoadenylate synthetase 1A                                                                                                    | Oas1a                | 0.48±0.11  |
| 2'-5' oligoadenylate synthetase-like 1                                                                                                | Oas1l                | 0.69±0.18  |
| 2-hydroxyacyl-CoA lyase 1                                                                                                             | Hacl1                | 1.31±0.14  |
| 2-oxoglutarate and iron-dependent oxygenase domain containing 1                                                                       | Ogfd1                | 0.36±0.21  |
| 3-hydroxy-3-methylglutaryl-Coenzyme A lyase                                                                                           | Hmgcl                | 2.64±0.08  |
| 3-hydroxy-3-methylglutaryl-Coenzyme A reductase                                                                                       | Hmgcr                | 2.66±1.69  |
| 3-hydroxy-3-methylglutaryl-Coenzyme A synthase 1                                                                                      | Hmgcs1               | 6.71±5.14  |
| 3-hydroxybutyrate dehydrogenase, type 1                                                                                               | Bdh1                 | 6.78±2.29  |
| 3-hydroxybutyrate dehydrogenase, type 2 (predicted)                                                                                   | Bdh2_predicted       | 2.65±0.27  |
| 3-hydroxyisobutyrate dehydrogenase                                                                                                    | Hibadh               | 28.82±4.7  |
| 3-hydroxyisobutyryl-Coenzyme A hydrolase                                                                                              | Hibch                | 6.12±0.13  |
| 3-ketodihydrospingosine reductase                                                                                                     | Kdsr                 | 0.51±0.01  |
| 3-oxoacyl-ACP synthase, mitochondrial                                                                                                 | Oxsm                 | 1.3±0.45   |
| 3'-phosphoadenosine 5'-phosphosulfate synthase 1 (predicted)                                                                          | Papss1_predicted     | 11.58±0.92 |
| 3'-phosphoadenosine 5'-phosphosulfate synthase 2 (predicted)                                                                          | Papss2_predicted     | 5.2±0.17   |
| 3-phosphoinositide dependent protein kinase-1                                                                                         | Pdpk1                | 1.83±0.36  |
| 4-hydroxyphenylpyruvate dioxygenase-like                                                                                              | Hpd1                 | 0.92±0.43  |
| 4-hydroxyphenylpyruvic acid dioxygenase                                                                                               | Hpd                  | 4.94±2.58  |
| 4-nitrophenylphosphatase domain and non-neuronal SNAP25-like protein homolog 1 (C. elegans)                                           | Nipsnap1             | 2.57±0.32  |
| 5, 10-methylnetetrahydrofolate synthetase                                                                                             | Mthfs                | 1.33±0.63  |
| 5',3'-nucleotidase, mitochondrial (predicted)                                                                                         | Nt5m_predicted       | 0.86±0.06  |
| 5'-3' exoribonuclease 1 (predicted)                                                                                                   | Xrn1_predicted       | 0.2±0.03   |
| 5'-3' exoribonuclease 2 (predicted)                                                                                                   | Xrn2_predicted       | 1.89±1.05  |
| 5-aminimidazole-4-carboxamide ribonucleotide formyltransferase/IMP cyclohydrolase                                                     | Atic                 | 2.09±0.49  |
| 5-azacytidine induced gene 2                                                                                                          | Azi2                 | 1.18±0.4   |
| 5-methyltetrahydrofolate-homocysteine methyltransferase                                                                               | Mtr                  | 0.21±0.07  |
| 5-methyltetrahydrofolate-homocysteine methyltransferase reductase                                                                     | Mtrr                 | 1.64±0.23  |
| 5'-nucleotidase domain containing 1 (predicted)                                                                                       | Nt5dc1_predicted     | 1.12±0.68  |
| 5'-nucleotidase, cytosolic III (predicted)                                                                                            | Nt5c3_predicted      | 2.34±0.64  |
| 5'-nucleotidase, cytosolic III-like                                                                                                   | Nt5c3l               | 4.42±1.16  |
| 5-oxoprolinase (ATP-hydrolyzing)                                                                                                      | Oplah                | 8.87±1.72  |
| 6-phosphofructo-2-kinase/fructose-2,6-biphosphatase 2                                                                                 | Pfkfb2               | 0.26±0.12  |
| 6-phosphogluconolactonase (predicted)                                                                                                 | Pgls_predicted       | 1.44±0.26  |
| 6-pyruvoyl-tetrahydropterin synthase                                                                                                  | Pts                  | 5.48±0.16  |
| 7-dehydrocholesterol reductase                                                                                                        | Dhcr7                | 1.23±0.2   |
| 92Aa-Protein                                                                                                                          | LOC494529            | 3.24±0.45  |
| a disintegrin and metallopeptidase domain 10                                                                                          | Adam10               | 1±0.21     |
| a disintegrin and metallopeptidase domain 17                                                                                          | Adam17               | 1.11±0.5   |
| a disintegrin and metallopeptidase domain 1a                                                                                          | Adam1a               | 0.21±0.11  |
| a disintegrin and metallopeptidase domain 9 (meltrin gamma)                                                                           | Adam9                | 0.98±0.33  |
| A kinase (PRKA) anchor protein (yotiao) 9                                                                                             | Akap9                | 3.16±0.64  |
| A kinase (PRKA) anchor protein 1                                                                                                      | Akap1                | 3.78±0.08  |
| A kinase (PRKA) anchor protein 10 (predicted)                                                                                         | Akap10_predicted     | 0.9±0.05   |
| A kinase (PRKA) anchor protein 11                                                                                                     | Akap11               | 1.14±0.04  |
| A kinase (PRKA) anchor protein 7                                                                                                      | Akap7                | 1.59±0.13  |
| A kinase (PRKA) anchor protein 8                                                                                                      | Akap8                | 3.07±0.57  |
| A kinase (PRKA) anchor protein 8-like                                                                                                 | Akap8l               | 1.04±0.21  |
| aarF domain containing kinase 1 (predicted)                                                                                           | Adck1_predicted      | 0.37±0.03  |
| aarF domain containing kinase 2 (predicted)                                                                                           | Adck2_predicted      | 0.66±0.27  |
| aarF domain containing kinase 4                                                                                                       | Adck4                | 1.59±0.25  |
| aarF domain containing kinase 5                                                                                                       | Adck5                | 0.96±0.08  |
| Abelson helper integration site 1                                                                                                     | Ahi1                 | 0.47±0.16  |
| abhydrolase domain containing 1                                                                                                       | Abhd1                | 0.53±0.06  |
| abhydrolase domain containing 10                                                                                                      | Abhd10               | 0.48±0.13  |
| abhydrolase domain containing 11 /// similar to abhydrolase domain containing 11                                                      | Abhd11 /// LOC686139 | 1.98±0.04  |
| abhydrolase domain containing 12                                                                                                      | Abhd12               | 1.19±0.45  |
| abhydrolase domain containing 13                                                                                                      | Abhd13               | 1.7±0.03   |
| abhydrolase domain containing 14b                                                                                                     | Abhd14b              | 13.59±0.47 |
| abhydrolase domain containing 3 (predicted)                                                                                           | Abhd3_predicted      | 2.21±0.27  |
| abhydrolase domain containing 4 (predicted)                                                                                           | Abhd4_predicted      | 7.09±0.83  |
| abhydrolase domain containing 6                                                                                                       | Abhd6                | 2.98±0.68  |
| abhydrolase domain containing 8 (predicted)                                                                                           | Abhd8_predicted      | 1.34±0.09  |
| abl-interactor 1                                                                                                                      | Abi1                 | 1.36±0.64  |
| abl-interactor 2                                                                                                                      | Abi2                 | 3.39±0.02  |
| ABO blood group (transferase A, alpha 1-3-N-acetylgalactosaminyltransferase; transferase B, alpha 1-3-galactosyltransferase)          | Abo                  | 1.59±0.37  |
| Ac1254                                                                                                                                | LOC362901            | 8.33±1.05  |
| acetoacetyl-CoA synthetase                                                                                                            | Aacs                 | 0.47±0.11  |
| acetyl-coenzyme A acetyltransferase 1                                                                                                 | Acat1                | 33.36±3.13 |
| acetyl-Coenzyme A acetyltransferase 2                                                                                                 | Acat2                | 2.34±0.01  |
| acetyl-Coenzyme A acyltransferase 1 /// similar to 3-ketoacyl-CoA thiolase B, peroxisomal precursor (Beta-ketothiolase B) (predicted) | Acaa1 /// RGD1562373 | 3.66±0.43  |
| acetyl-Coenzyme A acyltransferase 2 (mitochondrial 3-oxoacyl-Coenzyme A thiolase)                                                     | Acaa2                | 14.84±1.13 |
| acetyl-coenzyme A carboxylase alpha                                                                                                   | Acaca                | 2.8±0.24   |
| acetyl-Coenzyme A carboxylase beta                                                                                                    | Acacb                | 1±0.04     |
| acetylserotonin O-methyltransferase-like (predicted)                                                                                  | Asmtl_predicted      | 2.91±0.23  |

|                                                                                                                                |                         |            |
|--------------------------------------------------------------------------------------------------------------------------------|-------------------------|------------|
| acid phosphatase 1, soluble                                                                                                    | Acp1                    | 2.75±0.1   |
| acid phosphatase 2, lysosomal                                                                                                  | Acp2                    | 2.19±0.24  |
| acid phosphatase 5, tartrate resistant                                                                                         | Acp5                    | 4.05±0.4   |
| acid phosphatase 6, lysophosphatidic                                                                                           | Acp6                    | 2.03±0.05  |
| acid phosphatase-like 2                                                                                                        | AcpI2                   | 0.62±0.08  |
| acidic (leucine-rich) nuclear phosphoprotein 32 family, member A                                                               | Anp32a                  | 6.4±2.06   |
| Acidic (leucine-rich) nuclear phosphoprotein 32 family, member E                                                               | Anp32e                  | 2.97±1.05  |
| acidic nuclear phosphoprotein 32 family, member B                                                                              | Anp32b                  | 4.64±0.4   |
| acidic ribosomal phosphoprotein P0                                                                                             | Arbp                    | 33.9±0.71  |
| acireductone dioxygenase 1                                                                                                     | Adi1                    | 12.75±1.46 |
| ACN9 homolog (S. cerevisiae)                                                                                                   | Acn9                    | 3.41±1.03  |
| aconitase 1                                                                                                                    | Aco1                    | 5.26±0.14  |
| aconitase 2, mitochondrial                                                                                                     | Aco2                    | 34.96±3.19 |
| actin filament associated protein 1-like 1                                                                                     | Afap111                 | 0.86±0.09  |
| actin related protein 2/3 complex, subunit 1A                                                                                  | Arpc1a                  | 4.95±0.45  |
| actin related protein 2/3 complex, subunit 1B                                                                                  | Arpc1b                  | 0.76±0.11  |
| actin related protein 2/3 complex, subunit 2 (predicted)                                                                       | Arpc2_predicted         | 19.82±2.52 |
| actin related protein 2/3 complex, subunit 3 (predicted)                                                                       | Arpc3_predicted         | 7.78±0.81  |
| actin related protein 2/3 complex, subunit 4 (predicted)                                                                       | Arpc4_predicted         | 3.88±0.48  |
| actin related protein 2/3 complex, subunit 5                                                                                   | Arpc5                   | 6.51±0.49  |
| actin related protein 2/3 complex, subunit 5-like /// similar to actin related protein 2/3 complex, subunit 5-like (predicted) | Arpc5I /// RGD1560362   | 3.53±0.21  |
| actin, beta                                                                                                                    | Actb                    | 27.78±3.54 |
| actin, gamma, cytoplasmic 1                                                                                                    | Actg1 /// LOC295810 /// | 0.24±0.32  |
| actin, gamma, cytoplasmic 1 /// similar to Actin, cytoplasmic 2 (Gamma-actin)                                                  | Actg1 /// LOC295810     | 52.52±7.67 |
| actinin alpha 4                                                                                                                | Actn4                   | 8.04±0.96  |
| actinin, alpha 1                                                                                                               | Actn1                   | 0.48±0.76  |
| actin-like 6A                                                                                                                  | Actl6a                  | 2.28±0.42  |
| activated leukocyte cell adhesion molecule                                                                                     | Alcam                   | 2.8±0.58   |
| activating signal cointegrator 1 complex subunit 1                                                                             | Ascc1                   | 0.95±0.18  |
| activating signal cointegrator 1 complex subunit 2                                                                             | Ascc2                   | 0.55±0.06  |
| activating signal cointegrator 1 complex subunit 3 (predicted)                                                                 | Ascc3_predicted         | 1.5±0.66   |
| activating signal cointegrator 1 complex subunit 3-like 1                                                                      | Ascc3I1                 | 2.39±0.15  |
| activating transcription factor 1                                                                                              | Atf1                    | 5.98±0.29  |
| activating transcription factor 4                                                                                              | Atf4                    | 13.66±2.54 |
| activating transcription factor 5                                                                                              | Atf5                    | 1.42±0.23  |
| Activating transcription factor 6 (predicted)                                                                                  | Atf6_predicted          | 2.38±0.09  |
| activating transcription factor 7 interacting protein (predicted)                                                              | Atf7ip_predicted        | 1.15±0.19  |
| activator of basal transcription 1                                                                                             | Abt1                    | 1.11±0.21  |
| active BCR-related gene (predicted)                                                                                            | Abr_predicted           | 0.52±0.17  |
| actinin receptor IIA                                                                                                           | Acvr2a                  | 0.49±0.1   |
| actinin receptor IIB                                                                                                           | Acvr2b                  | 0.54±0.28  |
| activity-dependent neuroprotective protein                                                                                     | Adnp                    | 7.08±0.32  |
| acyl-CoA synthetase family member 2                                                                                            | Acsf2                   | 0.54±0.01  |
| acyl-CoA synthetase family member 3                                                                                            | Acsf3                   | 2.77±0.83  |
| acyl-CoA synthetase long-chain family member 1                                                                                 | Acs1                    | 22.68±0.64 |
| acyl-CoA synthetase long-chain family member 3                                                                                 | Acs3                    | 1.67±0.3   |
| acyl-CoA synthetase long-chain family member 4                                                                                 | Acs4                    | 4.86±1.93  |
| acyl-CoA synthetase long-chain family member 5                                                                                 | Acs5                    | 5.99±0.3   |
| acyl-CoA synthetase short-chain family member 1 (predicted)                                                                    | Acss1_predicted         | 18.72±0.3  |
| acyl-CoA synthetase short-chain family member 2 (predicted)                                                                    | Acss2_predicted         | 4.72±1.49  |
| acyl-CoA thioesterase 2                                                                                                        | Acot2                   | 1.36±0.75  |
| acyl-CoA thioesterase 3 /// acyl-CoA thioesterase 4                                                                            | Acot3 /// Acot4         | 0.28±0.06  |
| acyl-CoA thioesterase 7                                                                                                        | Acot7                   | 0.32±0.04  |
| acyl-CoA thioesterase 8                                                                                                        | Acot8                   | 4.74±1.1   |
| acyl-Coenzyme A binding domain containing 3                                                                                    | Acbd3                   | 1.46±0.22  |
| Acyl-Coenzyme A binding domain containing 5                                                                                    | Acbd5                   | 5.58±0.83  |
| acyl-Coenzyme A binding domain containing 6                                                                                    | Acbd6                   | 1.48±0.1   |
| acyl-Coenzyme A dehydrogenase family, member 11 (predicted)                                                                    | Acad11_predicted        | 1.2±0.05   |
| acyl-Coenzyme A dehydrogenase family, member 9                                                                                 | Acad9                   | 4.34±1.03  |
| acyl-Coenzyme A dehydrogenase, long-chain                                                                                      | Acadl                   | 14.86±1.84 |
| acyl-Coenzyme A dehydrogenase, medium chain                                                                                    | Acadm                   | 34.57±3.38 |
| acyl-Coenzyme A dehydrogenase, short chain                                                                                     | Acads                   | 1.95±0.25  |
| acyl-Coenzyme A dehydrogenase, short/branched chain                                                                            | Acadsb                  | 2.13±0.8   |
| acyl-Coenzyme A dehydrogenase, very long chain                                                                                 | Acadvl                  | 7.45±1.26  |
| acyl-Coenzyme A oxidase 1, palmitoyl                                                                                           | Acox1                   | 8.97±1.42  |
| acylglycerol kinase                                                                                                            | Aqk                     | 0.97±0.17  |
| acylpeptide hydrolase                                                                                                          | Apeh                    | 3.99±0.3   |
| acylphosphatase 1, erythrocyte (common) type (predicted)                                                                       | Acyp1_predicted         | 3.08±0.15  |
| ADAMTS-like 2                                                                                                                  | Adamtsl2                | 0.48±0.01  |
| ADAMTS-like 5 (predicted)                                                                                                      | Adamtsl5_predicted      | 0.35±0.01  |
| adaptor protein complex AP-1, beta 1 subunit                                                                                   | Ap1b1                   | 2.51±0.91  |
| adaptor protein complex AP-1, sigma 1 (predicted)                                                                              | Ap1s1_predicted         | 5.2±0.94   |
| adaptor protein complex AP-2, alpha 2 subunit                                                                                  | Ap2a2                   | 2.17±0.57  |
| adaptor protein, phosphotyrosine interaction, PH domain and leucine zipper containing 2                                        | AppI2                   | 3.42±0.71  |
| adaptor-related protein complex 1, gamma 1 subunit                                                                             | Ap1q1                   | 1.66±0.1   |
| adaptor-related protein complex 2, beta 1 subunit                                                                              | Ap2b1                   | 5.94±0.78  |
| adaptor-related protein complex 2, mu 1 subunit                                                                                | Ap2m1                   | 20.2±2.47  |
| adaptor-related protein complex 2, sigma 1 subunit                                                                             | Ap2s1                   | 4.3±0.33   |
| adaptor-related protein complex 3, beta 1 subunit (predicted)                                                                  | Ap3b1_predicted         | 2.71±1.16  |
| adaptor-related protein complex 3, delta 1 subunit                                                                             | Ap3d1                   | 12.26±0.03 |
| adaptor-related protein complex 3, mu 1 subunit                                                                                | Ap3m1                   | 3.72±0.48  |
| adaptor-related protein complex 3, mu 2 subunit                                                                                | Ap3m2                   | 0.32±0.14  |
| adaptor-related protein complex 3, sigma 1 subunit (predicted)                                                                 | Ap3s1_predicted         | 2.44±0.52  |
| adaptor-related protein complex AP-1, mu subunit 1                                                                             | Ap1m1                   | 1.5±0.1    |
| adaptor-related protein complex AP-4, beta 1 (predicted)                                                                       | Ap4b1_predicted         | 1.34±0.11  |
| adducin 1 (alpha)                                                                                                              | Add1                    | 10.12±1.48 |
| adducin 3 (gamma)                                                                                                              | Add3                    | 1.14±0.43  |

|                                                                                                  |                           |            |
|--------------------------------------------------------------------------------------------------|---------------------------|------------|
| adenine phosphoribosyl transferase (predicted)                                                   | Aprt_predicted            | 11.54±0.84 |
| adenosine deaminase, RNA-specific                                                                | Adar                      | 0.26±0.21  |
| adenosine kinase                                                                                 | Adk                       | 4.77±1.05  |
| adenosine monophosphate deaminase 2 (isoform L)                                                  | Ampd2                     | 1±0.05     |
| adenosine monophosphate deaminase 3                                                              | Ampd3                     | 10.3±1.37  |
| adenylate cyclase 6                                                                              | Adcy6                     | 0.59±0.06  |
| adenylate kinase 1                                                                               | Ak1                       | 1.67±0.57  |
| adenylate kinase 2                                                                               | Ak2                       | 5.75±0.04  |
| adenylate kinase 3                                                                               | Ak3                       | 11.78±2.52 |
| adenylosuccinate lyase                                                                           | Adsl                      | 1.99±0.35  |
| adenylosuccinate synthetase, non muscle (predicted)                                              | Adss_predicted            | 9.54±1.42  |
| adhesion molecule with Ig like domain 1                                                          | Amigo1                    | 0.7±0.22   |
| adhesion regulating molecule 1                                                                   | Adrm1                     | 2.14±0.42  |
| adiponectin receptor 1                                                                           | Adipor1                   | 14.47±0.14 |
| adiponectin receptor 2                                                                           | Adipor2                   | 2.27±0.52  |
| adipose differentiation related protein                                                          | Adfp                      | 1.85±0.45  |
| ADNP homeobox 2                                                                                  | Adnp2                     | 0.9±0.1    |
| ADP-dependent glucokinase                                                                        | Adpgk                     | 0.29±0.14  |
| ADP-ribosylarginine hydrolase                                                                    | Adprh                     | 1.3±0.25   |
| ADP-ribosylation factor 1                                                                        | Arf1                      | 23.44±0.39 |
| ADP-ribosylation factor 2                                                                        | Arf2                      | 0.36±0.1   |
| ADP-ribosylation factor 3                                                                        | Arf3                      | 7.62±0.6   |
| ADP-ribosylation factor 4                                                                        | Arf4                      | 10.42±0.48 |
| ADP-ribosylation factor 4-like (predicted)                                                       | Arf4l_predicted           | 4.86±2.12  |
| ADP-ribosylation factor 5                                                                        | Arf5                      | 3.87±0.18  |
| ADP-ribosylation factor 6                                                                        | Arf6                      | 2.43±0.37  |
| ADP-ribosylation factor GTPase activating protein 1                                              | Arfgap1                   | 0.96±0.47  |
| ADP-ribosylation factor guanine nucleotide-exchange factor 1 (brefeldin A-inhibited) (predicted) | Arfgef1_predicted         | 2.81±0.62  |
| ADP-ribosylation factor guanine nucleotide-exchange factor 2 (brefeldin A-inhibited)             | Arfgef2                   | 1.15±0.05  |
| ADP-ribosylation factor interacting protein 2                                                    | Arfip2                    | 2.74±0.69  |
| ADP-ribosylation factor related protein 1                                                        | Arfrp1                    | 1.13±0.17  |
| ADP-ribosylation factor-like 1                                                                   | Arl1                      | 3.96±0.41  |
| ADP-ribosylation factor-like 13B                                                                 | Arl13b                    | 1.31±0.31  |
| ADP-ribosylation factor-like 2                                                                   | Arl2                      | 1.02±0.15  |
| ADP-ribosylation factor-like 2 binding protein                                                   | Arl2bp                    | 4.44±0.41  |
| ADP-ribosylation factor-like 3                                                                   | Arl3                      | 3.31±0.55  |
| ADP-ribosylation factor-like 4A                                                                  | Arl4a                     | 0.52±0.37  |
| ADP-ribosylation factor-like 4C                                                                  | Arl4c                     | 0.46±0.01  |
| ADP-ribosylation factor-like 5A                                                                  | Arl5a                     | 0.9±0.38   |
| ADP-ribosylation factor-like 6 (predicted)                                                       | Arl6_predicted            | 3.42±1.47  |
| ADP-ribosylation factor-like 6 interacting protein 1                                             | Arl6ip1                   | 4.74±0.5   |
| ADP-ribosylation factor-like 6 interacting protein 2                                             | Arl6ip2                   | 1.9±0.09   |
| ADP-ribosylation factor-like 6 interacting protein 4                                             | Arl6ip4                   | 1.76±0.72  |
| ADP-ribosylation factor-like 6 interacting protein 5                                             | Arl6ip5                   | 7.91±0.23  |
| ADP-ribosylation factor-like 8A                                                                  | Arl8a                     | 2.43±0.24  |
| ADP-ribosylation factor-like 8B                                                                  | Arl8b                     | 4.49±0.93  |
| ADP-ribosylhydrolase like 2 (predicted)                                                          | Adprh2_predicted          | 1.07±0.35  |
| adrenergic receptor kinase, beta 1                                                               | Adrbk1                    | 0.37±0.07  |
| adrenocortical dysplasia                                                                         | Acd                       | 1.42±0.09  |
| advanced glycosylation end product-specific receptor                                             | Ager /// Aqpat1 /// Btlr7 | 3.34±0.66  |
| AF4/FMR2 family, member 3 (predicted)                                                            | Aff3_predicted            | 0.21±0.01  |
| AF4/FMR2 family, member 4 (predicted)                                                            | Aff4_predicted            | 4.1±1.11   |
| AFG3(ATPase family gene 3)-like 1 (yeast) (predicted)                                            | Afg3l1_predicted          | 0.73±0.03  |
| AFG3(ATPase family gene 3)-like 2 (yeast)                                                        | Afg3l2                    | 3.91±1.33  |
| afipillin                                                                                        | Afip                      | 2.9±0.59   |
| agrin                                                                                            | Agri                      | 2.76±0.92  |
| AHNAK nucleoprotein (desmoyokin)                                                                 | Ahnak                     | 8.91±3.82  |
| ajuba                                                                                            | Jub                       | 5.45±2.56  |
| AKT1 substrate 1 (proline-rich) (predicted)                                                      | Akt1s1_predicted          | 1.49±0.2   |
| alanyl-tRNA synthetase                                                                           | Aars                      | 4.34±0.29  |
| alanyl-tRNA synthetase 2, mitochondrial (putative)                                               | Aars2                     | 0.43±0.11  |
| alanyl-tRNA synthetase domain containing 1                                                       | Aarsd1                    | 1.29±0.01  |
| alcohol dehydrogenase 4 (class II), pi polypeptide /// alcohol dehydrogenase 5                   | Adh4 /// Adh5             | 5.26±0.36  |
| alcohol dehydrogenase, iron containing, 1                                                        | Adhe1                     | 11.52±0.35 |
| aldehyde dehydrogenase 1 family, member A1                                                       | Aldh1a1                   | 39.7±4.82  |
| aldehyde dehydrogenase 1 family, member L1                                                       | Aldh1l1                   | 11.64±0.17 |
| aldehyde dehydrogenase 16 family, member A1                                                      | Aldh16a1                  | 2.47±0.29  |
| aldehyde dehydrogenase 9 family, member A1                                                       | Aldh9a1                   | 3.74±1.22  |
| aldehyde dehydrogenase family 1, subfamily A2                                                    | Aldh1a2                   | 4.41±0.79  |
| aldehyde dehydrogenase family 1, subfamily A7                                                    | Aldh1a7                   | 0.32±0.06  |
| aldehyde dehydrogenase family 3, subfamily A2                                                    | Aldh3a2                   | 4.47±0.25  |
| aldehyde dehydrogenase family 6, subfamily A1                                                    | Aldh6a1                   | 10.8±0.77  |
| aldehyde dehydrogenase family 7, member A1                                                       | Aldh7a1                   | 16.14±3.34 |
| aldo-keto reductase family 1, member A1 (aldehyde reductase)                                     | Akr1a1                    | 15.05±0.85 |
| aldo-keto reductase family 1, member B1 (aldose reductase)                                       | Akr1b1                    | 1.13±1.81  |
| aldo-keto reductase family 1, member E1                                                          | Akr1e1                    | 3.78±0.73  |
| aldo-keto reductase family 7, member A2 (aflatoxin aldehyde reductase)                           | Akr7a2                    | 3.14±2.3   |
| aldolase A                                                                                       | Aldoa                     | 60.73±1.36 |
| aldolase B                                                                                       | Aldob                     | 12.01±8.31 |
| alkB, alkylation repair homolog (E. coli) (predicted)                                            | Alkbh_predicted           | 2.11±0.66  |
| alkB, alkylation repair homolog 2 (E. coli) (predicted)                                          | Alkbh2_predicted          | 1.5±0.22   |
| alkB, alkylation repair homolog 3 (E. coli)                                                      | Alkbh3                    | 2.21±0.24  |
| alkB, alkylation repair homolog 5 (E. coli) (predicted)                                          | Alkbh5_predicted          | 1.21±0.17  |
| alkB, alkylation repair homolog 6 (E. coli)                                                      | Alkbh6                    | 1.03±0.47  |
| alkB, alkylation repair homolog 7 (E. coli)                                                      | Alkbh7                    | 2.79±0.3   |
| alpha globin regulatory element containing gene                                                  | Mare                      | 0.98±0.27  |
| alpha glucosidase 2 alpha neutral subunit (predicted)                                            | Ganab_predicted           | 2.7±0.4    |

|                                                                                     |                    |            |
|-------------------------------------------------------------------------------------|--------------------|------------|
| alpha thalassemia/mental retardation syndrome X-linked homolog (human)              | Atrx               | 5.32±0.5   |
| alpha-2-glycoprotein 1, zinc                                                        | Azgp1              | 0.59±0.1   |
| alpha-kinase 2                                                                      | Alpk2              | 0.31±0.42  |
| alpha-spectrin 2                                                                    | Spna2              | 14.4±3.75  |
| amine oxidase (flavin containing) domain 2                                          | Aof2               | 1.84±0.07  |
| amine oxidase, flavin containing 1 (predicted)                                      | Aof1_predicted     | 0.77±0.18  |
| aminoadipate-semialdehyde dehydrogenase                                             | Aasdh              | 0.9±0.15   |
| aminoadipate-semialdehyde dehydrogenase-phosphopantetheinyl transferase (predicted) | Aasdhppt_predicted | 2.87±0.68  |
| aminolevulinate, delta-, dehydratase                                                | Alad               | 2.04±0.1   |
| aminolevulinic acid synthase 1                                                      | Alas1              | 8.22±2.36  |
| aminomethyltransferase (glycine cleavage system protein T)                          | Amt                | 1.45±0     |
| aminopeptidase puromycin sensitive                                                  | Npepps             | 3.54±0.96  |
| aminopeptidase-like 1 (predicted)                                                   | Npepl1_predicted   | 1.8±0.06   |
| amino-terminal enhancer of split                                                    | Aes                | 9.56±0.78  |
| AMME chromosomal region gene 1-like                                                 | Ammecr11           | 4.36±1.03  |
| amphiphysin                                                                         | Amph               | 1.22±0.52  |
| amplified in osteosarcoma                                                           | Os9                | 1.03±0.96  |
| amylo-1,6-glucosidase, 4-alpha-glucanotransferase                                   | Ag1                | 3.36±0     |
| amyloid beta (A4) precursor protein                                                 | App                | 34.55±4.08 |
| amyloid beta (A4) precursor protein-binding, family A, member 3                     | Apba3              | 1.91±0.24  |
| amyloid beta (A4) precursor protein-binding, family B, member 1                     | Apbb1              | 1.24±0.03  |
| amyloid beta (A4) precursor protein-binding, family B, member 2                     | Apbb2              | 2±0.12     |
| amyloid beta (A4) precursor protein-binding, family B, member 3                     | Apbb3              | 0.2±0.25   |
| amyloid beta (A4) precursor-like protein 2                                          | Aplp2              | 15.29±0.24 |
| Amyloid beta precursor protein (cytoplasmic tail) binding protein 2                 | Appbp2             | 2.43±0.74  |
| amyloid beta precursor protein binding protein 1                                    | Appbp1             | 1.56±0.57  |
| amyotrophic lateral sclerosis 2 (juvenile) chromosome region, candidate 2           | Als2cr2            | 4.51±0.09  |
| Amyotrophic lateral sclerosis 2 (juvenile) homolog (human)                          | Als2               | 1.22±0.47  |
| anaphase promoting complex subunit 1 (predicted)                                    | Anapc1_predicted   | 0.57±0.1   |
| anaphase promoting complex subunit 10 (predicted)                                   | Anapc10_predicted  | 0.64±0.12  |
| anaphase promoting complex subunit 11 homolog (yeast)                               | Anapc11            | 3.94±0.26  |
| anaphase promoting complex subunit 2                                                | Anapc2             | 3.96±1.08  |
| anaphase promoting complex subunit 4                                                | Anapc4             | 2.64±0.18  |
| anaphase promoting complex subunit 7 (predicted)                                    | Anapc7_predicted   | 0.8±0.05   |
| anaphase-promoting complex subunit 5 (predicted)                                    | Anapc5_predicted   | 17.58±1.82 |
| ancient ubiquitous protein 1                                                        | Aup1               | 1.66±0.36  |
| androgen-induced 1                                                                  | Aig1               | 1.03±0.28  |
| angel homolog 2 (Drosophila) (predicted)                                            | Angel2_predicted   | 0.65±0.07  |
| angio-associated migratory protein (predicted)                                      | Aamp_predicted     | 4.79±0.35  |
| angiogenic factor with G patch and FHA domains 1                                    | Aggf1              | 1.08±0.13  |
| angiopoietin-like 4                                                                 | Angptl4            | 3.45±2.93  |
| angiotensin II receptor, type 1a                                                    | Agtr1a             | 3.15±1.29  |
| angiotensin II, type I receptor-associated protein                                  | Agtrap             | 0.41±0.37  |
| anillin, actin binding protein (scraps homolog, Drosophila)                         | Anln               | 0.46±0.02  |
| ankyrin repeat domain 50                                                            | Ankrd50            | 1.87±0.47  |
| ankyrin 2, neuronal                                                                 | Ank2               | 1.68±0.02  |
| ankyrin 3, epithelial                                                               | Ank3               | 6.98±0.6   |
| ankyrin repeat and BTB (POZ) domain containing 1                                    | Abtb1              | 1.63±0.09  |
| ankyrin repeat and FYVE domain containing 1 (predicted)                             | Anky1_predicted    | 2.98±0.51  |
| ankyrin repeat and IBR domain containing 1                                          | Ankib1             | 1.87±0.59  |
| ankyrin repeat and LEM domain containing 2                                          | Ankle2             | 1.07±0.04  |
| ankyrin repeat and MYND domain containing 2 (predicted)                             | Ankmy2_predicted   | 3.15±1.32  |
| ankyrin repeat and SAM domain containing 1 (predicted)                              | Anks1_predicted    | 13.5±0.31  |
| ankyrin repeat and SOCS box-containing protein 1 (predicted)                        | Asb1_predicted     | 0.32±0.06  |
| Ankyrin repeat and SOCS box-containing protein 3 (predicted)                        | Asb3_predicted     | 0.99±0.66  |
| ankyrin repeat and SOCS box-containing protein 6                                    | Asb6               | 0.78±0.29  |
| ankyrin repeat and SOCS box-containing protein 8 (predicted)                        | Asb8_predicted     | 4.54±0.67  |
| ankyrin repeat and SOCS box-containing protein 9 (predicted)                        | Asb9_predicted     | 3.38±0.8   |
| ankyrin repeat and sterile alpha motif domain containing 3                          | Anks3              | 0.81±0.34  |
| ankyrin repeat and zinc finger domain containing 1                                  | Ankzf1             | 0.57±0.25  |
| ankyrin repeat domain 1 (cardiac muscle)                                            | Ankrd1             | 0.28±0.22  |
| ankyrin repeat domain 10                                                            | Ankrd10            | 7.64±0.32  |
| ankyrin repeat domain 11 (predicted)                                                | Ankrd11_predicted  | 0.36±0.18  |
| ankyrin repeat domain 12 (predicted)                                                | Ankrd12_predicted  | 0.32±0.12  |
| ankyrin repeat domain 13a                                                           | Ankrd13a           | 17.7±3.51  |
| ankyrin repeat domain 13C                                                           | Ankrd13c           | 9.26±0.57  |
| ankyrin repeat domain 15                                                            | Ankrd15            | 6.58±1.15  |
| ankyrin repeat domain 17                                                            | Ankrd17            | 5.25±0.12  |
| ankyrin repeat domain 24 (predicted)                                                | Ankrd24_predicted  | 1.01±0.25  |
| ankyrin repeat domain 26                                                            | Ankrd26            | 0.2±0.01   |
| ankyrin repeat domain 28                                                            | Ankrd28            | 1.51±0.28  |
| ankyrin repeat domain 46                                                            | Ankrd46            | 5.65±1.03  |
| ankyrin repeat domain 49 (predicted)                                                | Ankrd49_predicted  | 0.83±0.37  |
| ankyrin repeat domain 52 (predicted)                                                | Ankrd52_predicted  | 1.4±0.15   |
| ankyrin repeat domain 54                                                            | Ankrd54            | 0.86±0.26  |
| ankyrin repeat domain 6                                                             | Ankrd6             | 0.31±0.12  |
| ankyrin repeat, family A (RFXANK-like), 2                                           | Ankra2             | 0.56±0.44  |
| annexin A1                                                                          | Anxa1              | 1.21±0.29  |
| annexin A11                                                                         | Anxa11             | 16.17±1.37 |
| annexin A2                                                                          | Anxa2              | 12.43±0.31 |
| annexin A4                                                                          | Anxa4              | 1.06±0.21  |
| annexin A5                                                                          | Anxa5              | 21.96±5.77 |
| annexin A6                                                                          | Anxa6              | 10.74±0.73 |
| annexin A7                                                                          | Anxa7              | 2.88±0.02  |
| anterior pharynx defective 1a homolog (C. elegans)                                  | Aph1a              | 6.31±2.06  |
| anterior pharynx defective 1b homolog (C. elegans)                                  | Aph1b              | 3.23±2.28  |
| antigen identified by monoclonal antibody Ki-67 (predicted)                         | Mki67_predicted    | 1.32±0.6   |

|                                                                                                                      |                     |            |
|----------------------------------------------------------------------------------------------------------------------|---------------------|------------|
| antigenic determinant of rec-A protein                                                                               | Kin                 | 0.85±0.64  |
| anti-Mullerian hormone type 2 receptor                                                                               | Amhr2               | 0.27±0.17  |
| Antisense paternally expressed gene 3                                                                                | Apeg3               | 1.77±0.23  |
| antizyme inhibitor 1                                                                                                 | Azin1               | 3.86±0.51  |
| AP1 gamma subunit binding protein 1                                                                                  | Ap1gbp1             | 1.9±0.29   |
| APAF1 interacting protein (predicted)                                                                                | Apip_predicted      | 0.86±0.01  |
| apolipoprotein A-1 binding protein (predicted)                                                                       | Apoa1bp_predicted   | 9.23±0.81  |
| apolipoprotein O-like                                                                                                | Apool               | 3.73±0.85  |
| apoptosis antagonizing transcription factor                                                                          | Aatf                | 0.31±0.05  |
| Apoptosis inhibitor 5 (predicted)                                                                                    | Api5_predicted      | 5.15±0.54  |
| apoptosis-inducing factor, mitochondrion-associated 1                                                                | Aifm1               | 17.84±5.57 |
| apoptosis-inducing factor, mitochondrion-associated 2                                                                | Aifm2               | 0.42±0.01  |
| apoptotic chromatin condensation inducer 1                                                                           | Acin1               | 3.63±0.36  |
| apoptotic peptidase activating factor 1                                                                              | Apaf1               | 0.26±0.19  |
| aprataxin                                                                                                            | Aptx                | 0.29±0.3   |
| apurinic/aprimidinic endonuclease 1                                                                                  | Apex1               | 1.24±0.06  |
| aquarius (predicted)                                                                                                 | Aqr_predicted       | 1.71±0.32  |
| archaelysin family metallopeptidase 2                                                                                | Amz2                | 0.9±0.17   |
| archain 1                                                                                                            | Arcn1               | 5.39±1.08  |
| Arg/Abl-interacting protein ArgBP2                                                                                   | Argbp2              | 1.07±0.48  |
| arginine vasopressin receptor 2                                                                                      | Avpr2               | 2.25±1.13  |
| arginine vasopressin-induced 1                                                                                       | Avpi1               | 3.35±0.68  |
| arginine/serine-rich coiled-coil 1                                                                                   | Rsrc1               | 1.26±0.02  |
| arginine-glutamic acid dipeptide (RE) repeats                                                                        | Rere                | 2.41±0.12  |
| arginine-rich, mutated in early stage tumors (predicted)                                                             | Armet_predicted     | 3.16±0.39  |
| arginine-tRNA-protein transferase 1 (predicted)                                                                      | Ate1_predicted      | 1.14±1.01  |
| argininosuccinate lyase                                                                                              | Asl                 | 1.69±0.87  |
| arginyl aminopeptidase (aminopeptidase B)                                                                            | Rnpep               | 11.27±0.35 |
| arginyl-tRNA synthetase (predicted)                                                                                  | Rars_predicted      | 2.13±0.43  |
| arginyl-tRNA synthetase 2, mitochondrial                                                                             | Rars2               | 1.49±0.11  |
| ariadne homolog 2 (Drosophila) (predicted)                                                                           | Arih2_predicted     | 1.2±0.11   |
| Ariadne ubiquitin-conjugating enzyme E2 binding protein homolog 1 (Drosophila)                                       | Arih1               | 0.87±0.25  |
| armadillo repeat containing 1 (predicted)                                                                            | Armc1_predicted     | 1.74±0.38  |
| armadillo repeat containing 10                                                                                       | Armc10              | 1.33±0.01  |
| armadillo repeat containing 5                                                                                        | Armc5               | 0.77±0.27  |
| armadillo repeat containing 8 (predicted)                                                                            | Armc8_predicted     | 1.28±0.28  |
| armadillo repeat containing 9 (predicted)                                                                            | Armc9_predicted     | 1.28±0.23  |
| armadillo repeat containing, X-linked 1                                                                              | Armcx1              | 0.77±0.03  |
| armadillo repeat containing, X-linked 2                                                                              | Armcx2              | 0.29±0.03  |
| armadillo repeat containing, X-linked 3                                                                              | Armcx3              | 1.29±0.12  |
| armadillo repeat containing, X-linked 6                                                                              | Armcx6              | 0.21±0.14  |
| ARP1 actin-related protein 1 homolog A (yeast) (predicted)                                                           | Actr1a_predicted    | 3.78±0.38  |
| ARP1 actin-related protein 1 homolog B (yeast)                                                                       | Actr1b              | 2.75±0.05  |
| ARP10 actin-related protein 10 homolog (S. cerevisiae)                                                               | Actr10              | 5.87±1.78  |
| ARP2 actin-related protein 2 homolog (yeast)                                                                         | Actr2               | 11.89±2.24 |
| ARP2 actin-related protein 2 homolog (yeast) /// similar to ARP2 actin-related protein 2 homolog (yeast) (predicted) | Actr2 /// LOC301861 | 0.23±0.07  |
| ARP3 actin-related protein 3 homolog (yeast)                                                                         | Actr3               | 5.51±0.87  |
| ARP5 actin-related protein 5 homolog (yeast) (predicted)                                                             | Actr5_predicted     | 0.37±0.01  |
| ARP6 actin-related protein 6 homolog (yeast) (predicted)                                                             | Actr6_predicted     | 2.86±1.56  |
| ARP8 actin-related protein 8 homolog (S. cerevisiae) (predicted)                                                     | Actr8_predicted     | 2.24±0.08  |
| arrestin domain containing 1                                                                                         | Arrdc1              | 1.87±0.31  |
| arrestin domain containing 2                                                                                         | Arrdc2              | 1.39±0.7   |
| arrestin, beta 2                                                                                                     | Arrb2               | 0.37±0.35  |
| arsA arsenite transporter, ATP-binding, homolog 1 (bacterial)                                                        | Asna1               | 3.55±1.02  |
| arsenic (+3 oxidation state) methyltransferase                                                                       | As3mt               | 0.76±0.34  |
| ARV1 homolog (yeast) (predicted)                                                                                     | Arv1_predicted      | 1.34±0.06  |
| aryl hydrocarbon receptor nuclear translocator 2                                                                     | Arnt2               | 10±0.16    |
| aryl hydrocarbon receptor nuclear translocator-like                                                                  | Arntl               | 0.97±0.17  |
| aryl-hydrocarbon receptor-interacting protein                                                                        | Aip                 | 2.08±0.18  |
| arylsulfatase A                                                                                                      | Arsa                | 3.82±0.68  |
| arylsulfatase B                                                                                                      | Arsb                | 1.61±0.31  |
| arylsulfatase E (chondrodysplasia punctata 1)                                                                        | Arse                | 1.1±0.26   |
| arylsulfatase K                                                                                                      | Arsk                | 0.78±0.34  |
| ASF1 anti-silencing function 1 homolog A (S. cerevisiae) (predicted)                                                 | Asf1a_predicted     | 2.14±0.76  |
| ASF1 anti-silencing function 1 homolog B (S. cerevisiae) (predicted)                                                 | Asf1b_predicted     | 0.23±0     |
| ash1 (absent, small, or homeotic)-like (Drosophila) (predicted)                                                      | Ash1_predicted      | 3.05±0.4   |
| ash2 (absent, small, or homeotic)-like (Drosophila) (predicted)                                                      | Ash2_predicted      | 1.96±0.46  |
| asp (abnormal spindle)-like, microcephaly associated (Drosophila) (predicted)                                        | Aspm_predicted      | 0.36±0.03  |
| asparaginase like 1                                                                                                  | Asrql1              | 1.38±0     |
| asparagine synthetase                                                                                                | Asns                | 0.8±0.21   |
| asparagine synthetase domain containing 1                                                                            | Asnsd1              | 2.22±0.53  |
| asparagine-linked glycosylation 1 homolog (yeast, beta-1,4-mannosyltransferase) (predicted)                          | Alg1_predicted      | 0.4±0.09   |
| asparagine-linked glycosylation 10 homolog B (yeast, alpha-1,2-glucosyltransferase)                                  | Alg10b              | 1.37±0.24  |
| asparagine-linked glycosylation 11 homolog (S. cerevisiae, alpha-1,2-mannosyltransferase)                            | Alg11               | 1.39±0.52  |
| asparagine-linked glycosylation 12 homolog (yeast, alpha-1,6-mannosyltransferase) (predicted)                        | Alg12_predicted     | 0.59±0     |
| asparagine-linked glycosylation 13 homolog (S. cerevisiae)                                                           | Alg13               | 1.8±0.19   |
| asparagine-linked glycosylation 14 homolog (S. cerevisiae)                                                           | Alg14               | 1.64±0.01  |
| asparagine-linked glycosylation 2 homolog (yeast, alpha-1,3-mannosyltransferase)                                     | Alg2                | 3.47±0.22  |
| asparagine-linked glycosylation 3 homolog (yeast, alpha-1,3-mannosyltransferase)                                     | Alg3                | 1.13±0.13  |
| asparagine-linked glycosylation 5 homolog (yeast, dolichyl-phosphate beta-glucosyltransferase)                       | Alg5                | 3.76±0.78  |
| asparagine-linked glycosylation 8 homolog (yeast, alpha-1,3-glucosyltransferase)                                     | Alg8                | 1.68±0.29  |
| asparagine-linked glycosylation 9 homolog (yeast, alpha 1,2 mannosyltransferase) (predicted)                         | Alg9_predicted      | 0.74±0.02  |
| asparaginyl-tRNA synthetase                                                                                          | Nars                | 2.55±0.44  |
| asparaginyl-tRNA synthetase 2, mitochondrial                                                                         | Nars2               | 0.54±0.01  |
| aspartate-beta-hydroxylase (predicted)                                                                               | Asph_predicted      | 0.56±0.08  |
| aspartyl aminopeptidase                                                                                              | Dnpep               | 11.15±1.24 |
| aspartylglucosaminidase                                                                                              | Aga                 | 3.03±0.08  |

|                                                                                           |                    |            |
|-------------------------------------------------------------------------------------------|--------------------|------------|
| aspartyl-tRNA synthetase                                                                  | Dars               | 5.98±2.64  |
| aspartyl-tRNA synthetase 2 (mitochondrial)                                                | Dars2              | 1.29±0.3   |
| AT hook containing transcription factor 1 (predicted)                                     | Ahctf1_predicted   | 1.14±0.34  |
| AT hook, DNA binding motif, containing 1 (predicted)                                      | Ahdc1_predicted    | 1.13±0.12  |
| AT rich interactive domain 1A (Swi1 like) (predicted)                                     | Arid1a_predicted   | 5.69±0.27  |
| AT rich interactive domain 1B (Swi1 like)                                                 | Arid1b             | 0.32±0.44  |
| AT rich interactive domain 2 (Arid-rfx like) (predicted)                                  | Arid2_predicted    | 2.12±0.5   |
| AT rich interactive domain 3A (Bright like) (predicted)                                   | Arid3a_predicted   | 0.56±0.24  |
| AT rich interactive domain 4A (Rbp1 like) (predicted)                                     | Arid4a_predicted   | 1.16±0.32  |
| AT rich interactive domain 4B (Rbp1 like)                                                 | Arid4b             | 2.12±0.21  |
| AT rich interactive domain 5B (Mrf1 like) (predicted)                                     | Arid5b_predicted   | 0.48±0.91  |
| ataxin 10                                                                                 | Atxn10             | 7.23±0.05  |
| ataxin 2 (predicted)                                                                      | Atxn2_predicted    | 3.04±0.98  |
| ataxin 2-like (predicted)                                                                 | Atxn2l_predicted   | 0.91±0.34  |
| ATG16 autophagy related 16-like 2 (S. cerevisiae) (predicted)                             | Atg16l2_predicted  | 0.36±0.06  |
| ATG2 autophagy related 2 homolog A (S. cerevisiae)                                        | Atg2a              | 0.96±0.16  |
| ATH1, acid trehalase-like 1 (yeast) (predicted)                                           | Ath1l_predicted    | 0.72±0.02  |
| ATP binding domain 1 family, member B (predicted)                                         | Atpbd1b_predicted  | 0.49±0     |
| ATP binding domain 1 family, member C                                                     | Atpbd1c            | 1.3±0.21   |
| ATP binding domain 4                                                                      | Atpbd4             | 2.83±0.83  |
| ATP citrate lyase                                                                         | Acly               | 3.23±0.71  |
| ATP synthase mitochondrial F1 complex assembly factor 1 (predicted)                       | Atpaf1_predicted   | 3.9±0.54   |
| ATP synthase mitochondrial F1 complex assembly factor 2 (predicted)                       | Atpaf2_predicted   | 3.7±0.9    |
| ATP synthase, H+ transporting mitochondrial F1 complex, beta subunit                      | Atp5b              | 58.52±1.84 |
| ATP synthase, H+ transporting, mitochondrial F0 complex, subunit b, isoform 1             | Atp5f1             | 49.16±1.78 |
| ATP synthase, H+ transporting, mitochondrial F0 complex, subunit c (subunit 9) isoform 3  | Atp5g3             | 57.76±0.77 |
| ATP synthase, H+ transporting, mitochondrial F0 complex, subunit c (subunit 9), isoform 1 | Atp5g1             | 47.41±3.52 |
| ATP synthase, H+ transporting, mitochondrial F0 complex, subunit c (subunit 9), isoform 2 | Atp5g2             | 33.27±2.89 |
| ATP synthase, H+ transporting, mitochondrial F0 complex, subunit d                        | Atp5h              | 43.49±4.15 |
| ATP synthase, H+ transporting, mitochondrial F0 complex, subunit e                        | Atp5i              | 29.03±5.51 |
| ATP synthase, H+ transporting, mitochondrial F0 complex, subunit F6                       | Atp5j              | 38.41±3.63 |
| ATP synthase, H+ transporting, mitochondrial F0 complex, subunit s                        | Atp5s              | 2.26±0.41  |
| ATP synthase, H+ transporting, mitochondrial F1 complex, alpha subunit, isoform 1         | Atp5a1             | 50.66±2.94 |
| ATP synthase, H+ transporting, mitochondrial F1 complex, delta subunit                    | Atp5d              | 34±3.54    |
| ATP synthase, H+ transporting, mitochondrial F1 complex, epsilon subunit                  | Atp5e              | 44.08±3.02 |
| ATP synthase, H+ transporting, mitochondrial F1 complex, gamma polypeptide 1              | Atp5c1             | 55.88±4.45 |
| ATP synthase, H+ transporting, mitochondrial F1 complex, O subunit                        | Atp5o              | 45.22±4.41 |
| ATP/GTP binding protein 1 (predicted)                                                     | Aqtpbp1_predicted  | 1.64±0.29  |
| ATP5S-like                                                                                | Atp5sl             | 3.25±0.42  |
| ATPase family, AAA domain containing 1                                                    | Atad1              | 8.23±1.09  |
| ATPase family, AAA domain containing 2 (predicted)                                        | Atad2_predicted    | 1.06±0.62  |
| ATPase family, AAA domain containing 3A                                                   | Atad3a             | 0.93±0.05  |
| ATPase family, AAA domain containing 3A                                                   | Atad5              | 0.22±0.11  |
| ATPase family, AAA domain containing 5                                                    | Atpif1             | 9.98±0.98  |
| ATPase inhibitory factor 1                                                                | Atp13a1_predicted  | 1.78±0.03  |
| ATPase type 13A1 (predicted)                                                              | Atp13a2_predicted  | 0.68±0.23  |
| ATPase type 13A2 (predicted)                                                              | Atp2a2             | 10.1±0.18  |
| ATPase, Ca++ transporting, cardiac muscle, slow twitch 2                                  | Atp2b1             | 1.49±0.73  |
| ATPase, Ca++ transporting, plasma membrane 1                                              | Atp2b2             | 0.41±0.05  |
| ATPase, Ca++ transporting, plasma membrane 2                                              | Atp2b3             | 1.59±0.16  |
| ATPase, Ca++ transporting, plasma membrane 3                                              | Atp2c2             | 0.23±0.02  |
| ATPase, Ca++ transporting, type 2C, member 2                                              | Atp2c1             | 0.99±0.16  |
| ATPase, Ca++-sequestering                                                                 | Atp8b1_predicted   | 2.75±0.13  |
| ATPase, Class I, type 8B, member 1 (predicted)                                            | Atp9b              | 1.08±0.08  |
| ATPase, class II, type 9B                                                                 | Atp11b             | 2.24±0.25  |
| ATPase, class VI, type 11B                                                                | Atp11c_predicted   | 0.46±0.24  |
| ATPase, class VI, type 11C (predicted)                                                    | Atp7b              | 0.24±0.09  |
| ATPase, Cu++ transporting, beta polypeptide                                               | Atp6v0c            | 18.03±0.05 |
| ATPase, H transporting, lysosomal V0 subunit c                                            | Atp6v1b2           | 5.82±1.19  |
| ATPase, H transporting, lysosomal V1 subunit B2                                           | Atp6v1f            | 11.32±0.82 |
| ATPase, H transporting, lysosomal V1 subunit F                                            | Atp6v1g1_predicted | 3.19±0.22  |
| ATPase, H transporting, lysosomal V1 subunit G1 (predicted)                               | Atp6ap1            | 6.26±0.12  |
| ATPase, H+ transporting, lysosomal accessory protein 1                                    | Atp6ap2            | 12.69±1.06 |
| ATPase, H+ transporting, lysosomal accessory protein 2                                    | Atp6v0a1           | 0.63±1.14  |
| ATPase, H+ transporting, lysosomal V0 subunit A1                                          | Atp6v0a2           | 0.72±0.11  |
| ATPase, H+ transporting, lysosomal V0 subunit A2                                          | Atp6v0a4           | 9.83±0.1   |
| ATPase, H+ transporting, lysosomal V0 subunit A4                                          | Atp6v0b            | 5.27±0.08  |
| ATPase, H+ transporting, lysosomal V0 subunit B                                           | Atp6v0d1           | 9.92±0.19  |
| ATPase, H+ transporting, lysosomal V0 subunit D1                                          | Atp6v0e            | 14.18±3.51 |
| ATPase, H+ transporting, lysosomal V0 subunit E1                                          | Atp6v0e2           | 4.69±0.75  |
| ATPase, H+ transporting, lysosomal V0 subunit E2                                          | Atp6v1a            | 11.46±0.19 |
| ATPase, H+ transporting, lysosomal V1 subunit A                                           | Atp6v1c1           | 5.66±0.78  |
| ATPase, H+ transporting, lysosomal V1 subunit C1                                          | Atp6v1d            | 12.35±2.54 |
| ATPase, H+ transporting, lysosomal V1 subunit D                                           | Atp6v1h            | 5.21±0.37  |
| ATPase, H+ transporting, lysosomal V1 subunit H                                           | Atp1a1             | 55.14±1.85 |
| ATPase, Na+/K+ transporting, alpha 1 polypeptide                                          | Atp1b1             | 64.21±7.61 |
| ATPase, Na+/K+ transporting, beta 1 polypeptide                                           | Atp1b3             | 8.55±0.16  |
| ATPase, Na+/K+ transporting, beta 3 polypeptide                                           | Abca2              | 6.26±1.4   |
| ATP-binding cassette, sub-family A (ABC1), member 2                                       | Abca3              | 1.55±0.04  |
| ATP-binding cassette, sub-family A (ABC1), member 3                                       | Abca4_predicted    | 2.95±0.13  |
| ATP-binding cassette, sub-family A (ABC1), member 4 (predicted)                           | Abca5              | 0.3±0.27   |
| ATP-binding cassette, sub-family A (ABC1), member 5                                       | Abcb10             | 6.4±0.87   |
| ATP-binding cassette, sub-family B (MDR/TAP), member 10                                   | Abcb6              | 1.46±0.36  |
| ATP-binding cassette, sub-family B (MDR/TAP), member 6                                    | Abcb8              | 2.5±0.41   |
| ATP-binding cassette, sub-family B (MDR/TAP), member 8                                    | Abcb9              | 0.44±0.03  |
| ATP-binding cassette, sub-family B (MDR/TAP), member 9                                    | Abcc1              | 1.17±0.17  |
| ATP-binding cassette, sub-family C (CFTR/MRP), member 1                                   | Abcc4              | 2.49±0.44  |
| ATP-binding cassette, sub-family C (CFTR/MRP), member 4                                   |                    |            |

|                                                                    |                   |            |
|--------------------------------------------------------------------|-------------------|------------|
| ATP-binding cassette, sub-family C (CFTR/MRP), member 5            | Abcc5             | 0.29±0.11  |
| ATP-binding cassette, sub-family D (ALD), member 3                 | Abcd3             | 2.98±0.44  |
| ATP-binding cassette, sub-family E (OABP), member 1                | Abce1             | 3.04±0.62  |
| ATP-binding cassette, sub-family F (GCN20), member 1               | Abcf1             | 3.59±0.49  |
| ATP-binding cassette, sub-family F (GCN20), member 2 (predicted)   | Abcf2_predicted   | 1.94±0.55  |
| ATP-binding cassette, sub-family F (GCN20), member 3               | Abcf3             | 2.11±0.44  |
| ATP-binding cassette, sub-family G (WHITE), member 1               | Abcg1             | 3.2±1.25   |
| ATR interacting protein                                            | Atrip             | 0.54±0.03  |
| atrophin 1                                                         | Atn1              | 2.3±0.17   |
| attractin                                                          | Atrn              | 2.08±0.08  |
| attractin like 1                                                   | Atrn1             | 3.48±0.22  |
| ATX1 (antioxidant protein 1) homolog 1 (yeast)                     | Atox1             | 4.26±0.36  |
| AU RNA binding protein/enoyl-coenzyme A hydratase (predicted)      | Auh_predicted     | 10.57±0.42 |
| aurora kinase A                                                    | Aurka             | 0.39±0.11  |
| aurora kinase A interacting protein 1                              | Aurkaip1          | 5.64±1.12  |
| aurora kinase B                                                    | Aurkb             | 0.35±0.2   |
| aurora kinase C (predicted)                                        | Aurkc_predicted   | 0.5±0.17   |
| autocrine motility factor receptor (predicted)                     | Amfr_predicted    | 1.91±0.83  |
| autophagy-related 10 (S. cerevisiae)                               | Atq10             | 0.63±0.11  |
| autophagy-related 12 (yeast)                                       | Atq12             | 2.54±0.07  |
| autophagy-related 16-like 1 (yeast)                                | Atq16l1           | 1.01±0.08  |
| autophagy-related 3 (yeast)                                        | Atq3              | 2.47±0.15  |
| autophagy-related 4B (yeast)                                       | Atq4b             | 1.19±0.37  |
| Autophagy-related 7 (yeast)                                        | Atq7              | 0.55±0.15  |
| autophagy-related 9A (yeast)                                       | Atq9a             | 2.03±0.19  |
| axin 1                                                             | Axin1             | 1.59±0.22  |
| AXIN1 up-regulated 1 (predicted)                                   | Axud1_predicted   | 0.2±0.44   |
| B9 protein domain 1                                                | B9d1              | 3.44±0.02  |
| baculoviral IAP repeat-containing 2                                | Birc2             | 1.53±0.05  |
| baculoviral IAP repeat-containing 4                                | Birc4             | 0.21±0.06  |
| baculoviral IAP repeat-containing 5                                | Birc5             | 0.5±0.15   |
| Bardet-Biedl syndrome 2 homolog (human)                            | Bbs2              | 1.46±0.43  |
| Bardet-Biedl syndrome 4 homolog (human) (predicted)                | Bbs4_predicted    | 1.13±0.11  |
| Bardet-Biedl syndrome 5                                            | Bbs5              | 0.43±0.01  |
| Bardet-Biedl syndrome 9                                            | Bbs9              | 1.26±0.41  |
| barrier to autointegration factor 1                                | Banf1             | 7.77±1.15  |
| Bartter syndrome, infantile, with sensorineural deafness (Barttin) | Bsnd              | 8.03±0.12  |
| basic helix-loop-helix domain containing, class B, 9               | Bhlhb9            | 0.24±0.02  |
| basic helix-loop-helix domain containing, class B2                 | Bhlhb2            | 2.5±1.17   |
| basic leucine zipper and W2 domains 1                              | Bzw1              | 5.81±0.58  |
| basic leucine zipper and W2 domains 2                              | Bzw2              | 1.55±0.3   |
| basic leucine zipper nuclear factor 1                              | Blzf1             | 0.44±0.12  |
| basic transcription factor 3                                       | Btf3              | 12.77±1.4  |
| basic transcription factor 3-like 4                                | Btf3l4            | 5.76±1.28  |
| basigin                                                            | Bsg               | 32.58±0.56 |
| basophilic leukemia expressed protein BLES03                       | Bles03            | 2.12±0.08  |
| BAT2 domain containing 1                                           | Bat2d             | 0.63±0.52  |
| B-box and SPRY domain containing                                   | Bspry             | 2.69±0.78  |
| BCDIN3 domain containing                                           | Bcdin3d           | 0.94±0.27  |
| B-cell CLL/lymphoma 7B                                             | Bcl7b             | 2.09±0.19  |
| B-cell CLL/lymphoma 7C (predicted)                                 | Bcl7c_predicted   | 0.77±0.3   |
| B-cell CLL/lymphoma 9 (predicted)                                  | Bcl9_predicted    | 0.36±0.17  |
| B-cell CLL/lymphoma 9-like (predicted)                             | Bcl9l_predicted   | 3.45±0.53  |
| B-cell leukemia/lymphoma 10                                        | Bcl10             | 3.69±0.78  |
| B-cell leukemia/lymphoma 6 (predicted)                             | Bcl6_predicted    | 3.68±1.47  |
| B-cell linker                                                      | Blink             | 1.48±1.09  |
| B-cell receptor-associated protein 29                              | Bcap29            | 4.07±0.14  |
| B-cell receptor-associated protein 31                              | Bcap31            | 12.33±1.77 |
| B-cell translocation gene 1, anti-proliferative                    | Btg1              | 30.83±3.27 |
| B-cell translocation gene 2, anti-proliferative                    | Btg2              | 3.26±8.42  |
| B-cell translocation gene 3                                        | Btg3              | 1.48±0.49  |
| Bcl-2 binding component 3                                          | Bbc3              | 0.64±0.49  |
| BCL2/adenovirus E1B 19 kDa-interacting protein 3                   | Bnip3             | 6.57±0.43  |
| BCL2/adenovirus E1B 19kDa-interacting protein 1                    | Bnip1             | 2.07±0.05  |
| BCL2/adenovirus E1B interacting protein 2                          | Bnip2             | 0.53±0.17  |
| BCL2/adenovirus E1B interacting protein 3-like                     | Bnip3l            | 5.49±0.37  |
| BCL2-antagonist/killer 1                                           | Bak1              | 0.6±0.14   |
| Bcl2-associated athanogene 1 (predicted)                           | Bag1_predicted    | 6.11±1.46  |
| Bcl2-associated athanogene 3                                       | Bag3              | 0.8±1.63   |
| BCL2-associated athanogene 4                                       | Bag4              | 1.34±0.01  |
| BCL2-associated athanogene 5                                       | Bag5              | 1.59±0.7   |
| bcl2-associated death promoter                                     | Bad               | 2.06±0.63  |
| BCL2-associated transcription factor 1                             | Bclaf1            | 7.02±0.78  |
| Bcl2-associated X protein                                          | Bax               | 0.82±0.22  |
| Bcl2-like 1                                                        | Bcl2l1            | 1.63±0.67  |
| BCL2-like 13 (apoptosis facilitator) (predicted)                   | Bcl2l13_predicted | 1.03±0.02  |
| Bcl2-like 14 (apoptosis facilitator)                               | Bcl2l14           | 0.76±0.04  |
| Bcl2-like 2                                                        | Bcl2l2            | 1.05±0.07  |
| Bcl2-like 2 /// poly(A) binding protein, nuclear 1                 | Bcl2l2 /// Pabpn1 | 5.89±1.49  |
| Bcl6 interacting corepressor (predicted)                           | Bcor_predicted    | 0.83±0.23  |
| BCS1-like (yeast)                                                  | Bcs1l             | 1.14±0.29  |
| beclin 1, autophagy related                                        | Becn1             | 3.7±0.8    |
| Bernardinelli-Seip congenital lipodystrophy 2 homolog (human)      | Bscl2             | 3.28±0.53  |
| beta galactoside alpha 2,6 sialyltransferase 1                     | St6gal1           | 2.53±1.41  |
| beta-1,4-N-acetyl-galactosaminyl transferase 1                     | B4galnt1          | 3.47±1.8   |
| beta-2 microglobulin                                               | B2m               | 7.84±12.3  |
| beta-transducin repeat containing                                  | Btrc              | 0.36±0.19  |

|                                                                                                                                |                         |            |
|--------------------------------------------------------------------------------------------------------------------------------|-------------------------|------------|
| BH3 interacting domain death agonist                                                                                           | Bid                     | 0.3±0.1    |
| bicaudal D homolog 2 ( <i>Drosophila</i> )                                                                                     | Bicd2                   | 1.32±0.3   |
| bifunctional apoptosis regulator                                                                                               | Bfar                    | 0.79±0.33  |
| biliverdin reductase A                                                                                                         | Blvra                   | 0.43±0.5   |
| biliverdin reductase B (flavin reductase (NADPH)) (predicted) /// similar to biliverdin reductase B (flavin reductase (NADPH)) | Blvrb_predicted /// LOC | 0.52±0.12  |
| biogenesis of lysosome-related organelles complex-1, subunit 1 (predicted)                                                     | Bloc1s1_predicted       | 5.4±0.33   |
| biogenesis of lysosome-related organelles complex-1, subunit 2                                                                 | Bloc1s2                 | 1.49±0.2   |
| biotinidase                                                                                                                    | Btd                     | 1.4±0.45   |
| biphenyl hydrolase-like (serine hydrolase, breast epithelial mucin-associated antigen)                                         | Bphl                    | 5.2±1.23   |
| bisphosphate 3'-nucleotidase 1                                                                                                 | Bpnt1                   | 6.89±0.5   |
| bladder cancer associated protein homolog (human)                                                                              | Blcap                   | 3.9±0.38   |
| bleomycin hydrolase                                                                                                            | Blmh                    | 1.92±0.08  |
| block of proliferation 1                                                                                                       | Bop1                    | 0.38±0.07  |
| blocked early in transport 1 homolog ( <i>S. cerevisiae</i> )                                                                  | Bet1                    | 3.74±0.4   |
| blocked early in transport 1 homolog ( <i>S. cerevisiae</i> ) like                                                             | Bet1l                   | 1.1±0.12   |
| Bloom syndrome homolog (human) (predicted)                                                                                     | Blm_predicted           | 0.36±0.03  |
| Bm403207                                                                                                                       | LOC498525               | 0.89±0.06  |
| BMP and activin membrane-bound inhibitor, homolog ( <i>Xenopus laevis</i> )                                                    | Bambi                   | 2.35±1.04  |
| BMS1 homolog, ribosome assembly protein (yeast)                                                                                | Bms1                    | 0.89±0.61  |
| bobby sox homolog ( <i>Drosophila</i> ) (predicted)                                                                            | Bbx_predicted           | 1.88±0.83  |
| bolA homolog 3 ( <i>E. coli</i> )                                                                                              | Bola3                   | 4.58±2.06  |
| bolA-like 1 ( <i>E. coli</i> ) (predicted)                                                                                     | Bola1_predicted         | 4.3±1      |
| bone marrow stromal cell antigen 2                                                                                             | Bst2                    | 0.69±1.59  |
| bone morphogenetic protein 1                                                                                                   | Bmp1                    | 0.61±0.12  |
| bone morphogenetic protein 4                                                                                                   | Bmp4                    | 6.07±0.64  |
| bone morphogenetic protein 7                                                                                                   | Bmp7                    | 4.35±0.24  |
| bone morphogenetic protein receptor, type 1A                                                                                   | Bmpr1a                  | 2.59±0.09  |
| bone morphogenetic protein receptor, type II (serine/threonine kinase)                                                         | Bmpr2                   | 1.46±1     |
| bradykinin receptor, beta 2 /// similar to RIKEN cDNA 4933433P14 gene                                                          | Bdkrb2 /// RGD130847    | 0.25±0.22  |
| brain and acute leukemia, cytoplasmic                                                                                          | Baalc                   | 0.77±0.13  |
| brain and reproductive organ-expressed protein                                                                                 | Bre                     | 1.61±0.43  |
| brain expressed gene 1                                                                                                         | Bex1                    | 0.5±0.88   |
| brain expressed gene 4                                                                                                         | Bex4                    | 0.87±0.98  |
| brain expressed myelocytomatosis oncogene                                                                                      | Bmyc                    | 0.35±0.12  |
| brain expressed X-linked 2 /// brain expressed gene 1                                                                          | Bex1 /// Bex2           | 0.33±0.08  |
| brain glycogen phosphorylase                                                                                                   | Pygb                    | 7.86±1.59  |
| brain protein 16                                                                                                               | Brp16                   | 0.7±0.17   |
| brain protein 44-like                                                                                                          | Brp44l                  | 46.52±1.18 |
| brain protein I3                                                                                                               | Bri3                    | 6.38±0.05  |
| brain-specific angiogenesis inhibitor 1-associated protein 2                                                                   | Baiap2                  | 0.2±0.28   |
| branched chain aminotransferase 2, mitochondrial                                                                               | Bcat2                   | 10.65±1.54 |
| branched chain keto acid dehydrogenase E1, beta polypeptide                                                                    | Bckdhb                  | 11.92±0.06 |
| branched chain ketoacid dehydrogenase E1, alpha polypeptide                                                                    | Bckdha                  | 8.1±0.19   |
| branched chain ketoacid dehydrogenase kinase                                                                                   | Bckdk                   | 4.6±0.33   |
| Brca1 associated protein 1 (predicted)                                                                                         | Bap1_predicted          | 5.22±1.09  |
| BRCA1/BRCA2-containing complex, subunit 3                                                                                      | Brcc3                   | 6.11±1.3   |
| BRCA2 and CDKN1A interacting protein (predicted)                                                                               | Bccip_predicted         | 1.22±0.42  |
| breakpoint cluster region homolog (predicted)                                                                                  | Bcr_predicted           | 0.77±0.44  |
| breast cancer 2                                                                                                                | Brca2                   | 0.37±0.13  |
| breast cancer anti-estrogen resistance 1                                                                                       | Bcar1                   | 0.69±0.31  |
| breast cancer anti-estrogen resistance 3 (predicted)                                                                           | Bcar3_predicted         | 1.8±0.3    |
| breast cancer metastasis-suppressor 1                                                                                          | Brms1                   | 2.18±0.64  |
| breast cancer metastasis-suppressor 1-like (predicted)                                                                         | Brms1l_predicted        | 2.3±0.47   |
| breast carcinoma amplified sequence 2 (predicted)                                                                              | Bcas2_predicted         | 2.02±0.34  |
| breast carcinoma amplified sequence 3                                                                                          | Bcas3                   | 0.24±0.04  |
| BRF1 homolog, subunit of RNA polymerase III transcription initiation factor IIIB ( <i>S. cerevisiae</i> ) (predicted)          | Brf1_predicted          | 0.89±0.01  |
| BRF2, subunit of RNA polymerase III transcription initiation factor, BRF1-like                                                 | Brf2                    | 0.27±0.07  |
| bridging integrator 3                                                                                                          | Bin3                    | 1.46±0.3   |
| brix domain containing 1 (predicted)                                                                                           | Bxdc1_predicted         | 0.24±0.02  |
| brix domain containing 2                                                                                                       | Bxdc2                   | 1.15±0.13  |
| bromo adjacent homology domain containing 1                                                                                    | Bahd1                   | 0.76±0.26  |
| bromodomain adjacent to zinc finger domain, 1B                                                                                 | Baz1b                   | 2.79±0.25  |
| bromodomain adjacent to zinc finger domain, 2A (predicted)                                                                     | Baz2a_predicted         | 0.71±0.38  |
| bromodomain adjacent to zinc finger domain, 2B (predicted)                                                                     | Baz2b_predicted         | 1.44±0.09  |
| bromodomain and PHD finger containing, 1                                                                                       | Brpf1                   | 0.7±0.03   |
| bromodomain and WD repeat domain containing 2                                                                                  | Brwd2                   | 2.07±0.23  |
| bromodomain containing 1 (predicted)                                                                                           | Brd1_predicted          | 0.77±0.09  |
| bromodomain containing 2                                                                                                       | Brd2                    | 1.81±0.22  |
| bromodomain containing 3 (predicted)                                                                                           | Brd3_predicted          | 1.36±0.16  |
| bromodomain containing 4                                                                                                       | Brd4                    | 2.31±0.63  |
| bromodomain containing 7 (predicted)                                                                                           | Brd7_predicted          | 2.7±0.56   |
| bromodomain containing 8                                                                                                       | Brd8                    | 0.98±0.14  |
| bromodomain containing 9 (predicted)                                                                                           | Brd9_predicted          | 1.88±0.24  |
| BSD domain containing 1                                                                                                        | Bsdc1                   | 1.37±0.06  |
| BTB (POZ) domain containing 1                                                                                                  | Btbd1                   | 10.26±1.24 |
| BTB (POZ) domain containing 10                                                                                                 | Btbd10                  | 0.93±0.03  |
| BTB (POZ) domain containing 11 (predicted)                                                                                     | Btbd11_predicted        | 0.61±0.34  |
| BTB (POZ) domain containing 12                                                                                                 | Btbd12                  | 0.61±0.06  |
| BTB (POZ) domain containing 14A                                                                                                | Btbd14a                 | 1.33±0.2   |
| BTB (POZ) domain containing 2                                                                                                  | Btbd2                   | 1.62±0.45  |
| BTB (POZ) domain containing 3 (predicted)                                                                                      | Btbd3_predicted         | 0.99±0.12  |
| BTB (POZ) domain containing 6                                                                                                  | Btbd6                   | 3.73±0.61  |
| BTB (POZ) domain containing 9                                                                                                  | Btbd9                   | 0.52±0.18  |
| BUD13 homolog (yeast)                                                                                                          | Bud13                   | 0.69±0.1   |
| budding uninhibited by benzimidazoles 1 homolog ( <i>S. cerevisiae</i> ) (predicted)                                           | Bub1_predicted          | 0.33±0.05  |
| budding uninhibited by benzimidazoles 3 homolog ( <i>S. cerevisiae</i> )                                                       | Bub3                    | 5.44±0.93  |
| Bwk1 leukemia-related gene                                                                                                     | Bwk1                    | 1.65±0.45  |



|                                                                                    |                      |            |
|------------------------------------------------------------------------------------|----------------------|------------|
| bystin-like                                                                        | Bysl                 | 0.64±0.42  |
| C1GALT1-specific chaperone 1                                                       | C1galt1c1            | 4.83±0.38  |
| c-abl oncogene 1, receptor tyrosine kinase                                         | Abl1                 | 0.68±0.1   |
| cadherin 1                                                                         | Cdh1                 | 9.32±2.89  |
| cadherin 15                                                                        | Cdh15                | 0.24±0.1   |
| cadherin 16                                                                        | Cdh16                | 32.97±2.19 |
| cadherin 3, type 1, P-cadherin (placental)                                         | Cdh3                 | 1.06±0.08  |
| Cadherin 5 (predicted)                                                             | Cdh5_predicted       | 0.47±0.55  |
| cadherin EGF LAG seven-pass G-type receptor 1                                      | Celsr1               | 0.46±0.01  |
| cadherin EGF LAG seven-pass G-type receptor 2                                      | Celsr2               | 3.45±0.29  |
| calcineurin binding protein 1                                                      | Cabin1               | 1.13±0.04  |
| calcitonin gene-related peptide-receptor component protein                         | Crp                  | 1.56±0.15  |
| calcitonin receptor                                                                | Calcr                | 0.82±0.23  |
| calcium activated nucleotidase 1                                                   | Cant1                | 0.37±0.11  |
| calcium and integrin binding 1 (calmyrin)                                          | Cib1                 | 5.08±0.23  |
| calcium binding and coiled coil domain 1                                           | Calcoco1             | 3.46±0.32  |
| calcium binding atopy-related autoantigen 1                                        | Cbara1               | 0.42±0.05  |
| calcium binding protein 1                                                          | Cabp1                | 1.2±0.49   |
| calcium binding protein 39 (predicted)                                             | Cab39_predicted      | 4.41±1.19  |
| calcium binding protein 39-like                                                    | Cab39l               | 2.42±1     |
| calcium binding protein p22                                                        | Chp                  | 2.86±0.16  |
| calcium binding protein p22 /// similar to calcium binding protein P22 (predicted) | Chp /// RGD1565588_c | 1.27±0.3   |
| calcium homeostasis endoplasmic reticulum protein (predicted)                      | Cherp_predicted      | 1.16±0.17  |
| calcium modulating ligand                                                          | Camlg                | 0.62±0.15  |
| calcium regulated heat stable protein 1                                            | Carhsp1              | 1.67±0.74  |
| calcium/calmodulin-dependent protein kinase I                                      | Camk1                | 1.31±0.15  |
| calcium/calmodulin-dependent protein kinase II gamma                               | Camk2g               | 0.41±0.15  |
| Calcium/calmodulin-dependent protein kinase II inhibitor 1                         | Camk2n1              | 0.23±0.05  |
| calcium/calmodulin-dependent protein kinase II, delta                              | Camk2d               | 2.93±0.16  |
| calcium/calmodulin-dependent protein kinase kinase 1, alpha                        | Camkk1               | 0.77±0.07  |
| calcium/calmodulin-dependent protein kinase kinase 2, beta                         | Camkk2               | 0.3±0.24   |
| calcium/calmodulin-dependent serine protein kinase (MAGUK family)                  | Cask                 | 0.79±0.32  |
| calcium-sensing receptor                                                           | Casr                 | 9.96±0.69  |
| calcyclin binding protein                                                          | Cacybp               | 2.25±2.16  |
| calmodulin 1                                                                       | Calm1                | 11.52±1.12 |
| calmodulin 2                                                                       | Calm2                | 26.55±5.18 |
| calmodulin 3                                                                       | Calm3                | 2.01±0.5   |
| calmodulin binding transcription activator 2 (predicted)                           | Camta2_predicted     | 1.18±0.15  |
| calmodulin regulated spectrin-associated protein 1                                 | Camsap1              | 0.82±0     |
| calnexin                                                                           | Canx                 | 21.47±2.6  |
| calpain 1                                                                          | Capn1                | 9.48±1.35  |
| calpain 10                                                                         | Capn10               | 0.44±0.08  |
| calpain 2                                                                          | Capn2                | 7.92±0.96  |
| calpain 7                                                                          | Capn7                | 2.97±0.24  |
| calpain, small subunit 1                                                           | Capns1               | 9.07±0.01  |
| calpastatin                                                                        | Cast                 | 2.85±0.9   |
| calreticulin                                                                       | Calr                 | 7.87±1.93  |
| calreticulin 3                                                                     | Calr3                | 0.58±0.21  |
| calsyntenin 1                                                                      | Clstn1               | 4.67±2.24  |
| calumenin                                                                          | Calu                 | 4.2±0.04   |
| camello-like 5                                                                     | Cml5                 | 3.55±2.07  |
| cAMP responsive element binding protein 3                                          | Creb3                | 1±0        |
| cAMP responsive element binding protein 3-like 1                                   | Creb3l1              | 0.35±0.16  |
| cAMP responsive element binding protein 3-like 2                                   | Creb3l2              | 0.67±0.36  |
| cAMP responsive element binding protein-like 2                                     | Crebl2               | 1.06±0.05  |
| cAMP-regulated phosphoprotein 19                                                   | Arpp19               | 4.49±1.16  |
| Cancer susceptibility candidate 3                                                  | Casc3                | 0.93±0.04  |
| cannabinoid receptor 1 (brain)                                                     | Cnr1                 | 3.8±1.32   |
| canopy 3 homolog (zebrafish)                                                       | Cnpy3                | 1.23±0.09  |
| canopy 4 homolog (zebrafish)                                                       | Cnpy4                | 0.45±0.23  |
| CAP, adenylate cyclase-associated protein 1 (yeast)                                | Cap1                 | 5.19±0.78  |
| CAP-GLY domain containing linker protein 1                                         | Clip1                | 0.55±0.05  |
| CAP-GLY domain containing linker protein 2                                         | Clip2                | 1.63±0     |
| capicua homolog (Drosophila) (predicted)                                           | Cic_predicted        | 4.49±1.21  |
| capping protein (actin filament) muscle Z-line, alpha 2                            | Capza2               | 5.48±2.7   |
| capping protein (actin filament) muscle Z-line, beta                               | Capzb                | 8.7±1.45   |
| cappuccino                                                                         | Cno                  | 1.67±0.28  |
| carbamoyl-phosphate synthetase 2, aspartate transcarbamylase, and dihydroorotase   | Cad                  | 1.19±0.28  |
| carbohydrate (N-acetylglactosamine 4-0) sulfotransferase 14                        | Chst14               | 0.21±0.21  |
| carbonic anhydrase 11                                                              | Car11                | 1.62±0.45  |
| carbonic anhydrase 2                                                               | Ca2                  | 16.64±3.63 |
| carbonic anhydrase 4                                                               | Ca4                  | 11.21±1.55 |
| carbonic anhydrase VB, mitochondrial                                               | Ca5b                 | 1.04±0.34  |
| carbonyl reductase 1                                                               | Cbr1                 | 3.76±0.09  |
| carbonyl reductase 3 (predicted)                                                   | Cbr3_predicted       | 0.26±0.01  |
| carbonyl reductase 4                                                               | Cbr4                 | 3.5±0.33   |
| carboxylesterase 2 (intestine, liver)                                              | Ces2                 | 0.66±0.7   |
| carboxylesterase 3                                                                 | Ces3                 | 0.76±0.35  |
| carboxymethylenebutenolide homolog (Pseudomonas)                                   | Cmb1                 | 1.1±1.12   |
| carboxypeptidase A4                                                                | Cpa4                 | 0.29±0.06  |
| carboxypeptidase D                                                                 | Cpd                  | 3.73±1.13  |
| carboxypeptidase M (predicted)                                                     | Cpm_predicted        | 0.85±0.29  |
| carcinoembryonic antigen gene family 4                                             | Cgm4                 | 0.21±0.04  |
| cardiolipin synthase 1                                                             | Crls1                | 1.69±0.32  |
| cardiotrophin 1                                                                    | Ctf1                 | 0.99±0.47  |
| carnitine acetyltransferase                                                        | Crat                 | 6.13±2     |
| carnitine O-octanoyltransferase                                                    | Crot                 | 3.87±1.94  |

|                                                                                                       |                        |            |
|-------------------------------------------------------------------------------------------------------|------------------------|------------|
| carnitine palmitoyltransferase 1a, liver                                                              | Cpt1a                  | 17.39±1.64 |
| carnitine palmitoyltransferase 1b, muscle                                                             | Cpt1b                  | 12.75±1.34 |
| carnitine palmitoyltransferase 2                                                                      | Cpt2                   | 2.89±0.45  |
| cartilage associated protein                                                                          | Crtap                  | 3.66±0.11  |
| casein kinase 1, alpha 1                                                                              | Csnk1a1                | 6.91±0.98  |
| casein kinase 1, delta                                                                                | Csnk1d                 | 3.99±0.16  |
| casein kinase 1, epsilon                                                                              | Csnk1e                 | 0.42±0.04  |
| casein kinase 1, gamma 2                                                                              | Csnk1g2                | 1.32±0.1   |
| casein kinase 1, gamma 3                                                                              | Csnk1g3                | 0.96±0.13  |
| casein kinase 2, alpha 1 polypeptide                                                                  | Csnk2a1                | 0.79±0.24  |
| casein kinase 2, alpha prime polypeptide                                                              | Csnk2a2                | 1.65±0.21  |
| casein kinase 2, beta subunit                                                                         | Csnk2b                 | 11.25±1.96 |
| caseinolytic peptidase X (E.coli)                                                                     | Clpx                   | 5.4±0.65   |
| caseinolytic peptidase, ATP-dependent, proteolytic subunit homolog (E. coli)                          | Clpp                   | 2.43±0.17  |
| Casitas B-lineage lymphoma                                                                            | Cbl                    | 0.39±0.19  |
| Casitas B-lineage lymphoma b                                                                          | Cblb                   | 0.45±0.2   |
| Casitas B-lineage lymphoma-like 1 (predicted)                                                         | Cbl1l_predicted        | 1.26±0.1   |
| case-interacting protein 2 (predicted)                                                                | Caskin2_predicted      | 2.65±0.51  |
| CASP2 and RIPK1 domain containing adaptor with death domain (predicted)                               | Cradd_predicted        | 0.41±0.04  |
| CASP8 and FADD-like apoptosis regulator                                                               | Cflar                  | 0.41±0.3   |
| caspase 2                                                                                             | Casp2                  | 2.5±0.62   |
| caspase 3, apoptosis related cysteine protease                                                        | Casp3                  | 0.93±0.4   |
| caspase 6                                                                                             | Casp6                  | 2.04±0.33  |
| caspase 7                                                                                             | Casp7                  | 1.16±0.16  |
| caspase 8 associated protein 2 (predicted)                                                            | Casp8ap2_predicted     | 0.34±0.05  |
| caspase 9                                                                                             | Casp9                  | 0.92±0.01  |
| castration induced prostatic apoptosis-related protein 1                                              | Cipar1                 | 0.84±0.41  |
| catalase                                                                                              | Cat                    | 12.84±3.52 |
| catechol-O-methyltransferase domain containing 1 (predicted)                                          | Comtd1_predicted       | 8.98±1.69  |
| catenin (cadherin associated protein), alpha 1                                                        | Ctnna1                 | 20.97±0.31 |
| Catenin (cadherin associated protein), beta 1                                                         | Ctnnb1                 | 36.46±1.4  |
| catenin (cadherin associated protein), delta 1 (predicted)                                            | Ctnd1_predicted        | 0.86±0.15  |
| catenin, beta like 1                                                                                  | Ctnnb1l                | 1.98±0.29  |
| catenin, beta-interacting protein 1                                                                   | Ctnnbip1               | 1.77±0.61  |
| cathepsin B                                                                                           | Ctsb                   | 16.62±0.65 |
| cathepsin C                                                                                           | Ctsc                   | 7.04±1.53  |
| cathepsin D                                                                                           | Ctsd                   | 5.84±1.54  |
| cathepsin L                                                                                           | Ctsl                   | 4.69±19.13 |
| caudal type homeo box 2                                                                               | Cdx2                   | 0.29±0.18  |
| CBF1 interacting corepressor                                                                          | Cir                    | 1.35±0.09  |
| Cbp/p300-interacting transactivator with Glu/Asp-rich carboxy-terminal domain 1                       | Cited1                 | 4.9±3.84   |
| Cbp/p300-interacting transactivator, with Glu/Asp-rich carboxy-terminal domain, 2                     | Cited2                 | 4.95±1.9   |
| CCAAT/enhancer binding protein (C/EBP), beta                                                          | Cebpb                  | 1.81±2.86  |
| CCAAT/enhancer binding protein (C/EBP), delta                                                         | Cebpd                  | 0.86±1.78  |
| CCAAT/enhancer binding protein zeta (predicted)                                                       | Cebpz_predicted        | 2.3±0.73   |
| CCCTC-binding factor                                                                                  | Ctcf                   | 2.45±0.63  |
| CCR4-NOT transcription complex, subunit 10                                                            | Cnot10                 | 1.42±0.46  |
| CCR4-NOT transcription complex, subunit 2                                                             | Cnot2                  | 3.78±0.32  |
| CCR4-NOT transcription complex, subunit 4                                                             | Cnot4                  | 2.13±0.38  |
| CCR4-NOT transcription complex, subunit 6                                                             | Cnot6                  | 2.12±0.05  |
| CCR4-NOT transcription complex, subunit 7 (predicted)                                                 | Cnot7_predicted        | 2.08±0.76  |
| CCR4-NOT transcription complex, subunit 8                                                             | Cnot8                  | 0.75±0.21  |
| CD 81 antigen                                                                                         | Cd81                   | 17.97±1.72 |
| CD151 antigen (Raph blood group)                                                                      | Cd151                  | 5.24±2.36  |
| CD164 antigen                                                                                         | Cd164                  | 19.53±1.52 |
| CD1d1 antigen                                                                                         | Cd1d1                  | 1.02±0.09  |
| CD2 antigen (cytoplasmic tail) binding protein 2 (predicted)                                          | Cd2bp2_predicted       | 4.05±1.15  |
| CD24 antigen                                                                                          | Cd24                   | 43.92±1.31 |
| CD276 antigen                                                                                         | Cd276                  | 0.9±0.05   |
| CD320 antigen                                                                                         | Cd320                  | 6.93±1.11  |
| cd36 antigen                                                                                          | Cd36                   | 0.95±0.28  |
| CD47 antigen (Rh-related antigen, integrin-associated signal transducer)                              | Cd47                   | 2.21±0.09  |
| CD59 antigen                                                                                          | Cd59                   | 18.71±1.4  |
| CD63 antigen                                                                                          | Cd63                   | 38.38±1.98 |
| CD74 antigen (invariant polypeptide of major histocompatibility complex, class II antigen-associated) | Cd74                   | 27.81±0.21 |
| CD82 antigen                                                                                          | Cd82                   | 7.14±0.78  |
| CD9 antigen                                                                                           | Cd9                    | 9.43±0.56  |
| CD99 antigen                                                                                          | Cd99                   | 9.17±0.38  |
| Cd99 antigen-like 2                                                                                   | Cd99l2                 | 1.6±0.46   |
| CDC like kinase 4                                                                                     | Clk4                   | 3.35±0.76  |
| CDC16 cell division cycle 16 homolog (S. cerevisiae)                                                  | Cdc16                  | 2.24±0.03  |
| CDC23 (cell division cycle 23, yeast, homolog)                                                        | Cdc23                  | 1.27±0.24  |
| CDC28 protein kinase regulatory subunit 2                                                             | Cks2                   | 2.56±0.69  |
| Cdc2-related kinase, arginine/serine-rich                                                             | Crkrs                  | 1.01±0.01  |
| CDC42 binding protein kinase alpha                                                                    | Cdc42bpa               | 0.25±0.09  |
| Cdc42 binding protein kinase beta                                                                     | Cdc42bpb               | 1.03±0.2   |
| CDC42 effector protein (Rho GTPase binding) 1 (predicted)                                             | Cdc42ep1_predicted     | 0.34±0.49  |
| CDC42 effector protein (Rho GTPase binding) 2                                                         | Cdc42ep2               | 2.42±0.31  |
| CDC42 effector protein (Rho GTPase binding) 4 (predicted)                                             | Cdc42ep4_predicted     | 1.04±0.22  |
| CDC42 effector protein (Rho GTPase binding) 5 (predicted)                                             | Cdc42ep5_predicted     | 0.66±0.01  |
| CDC42 small effector 1                                                                                | Cdc42se1               | 3.56±1.15  |
| CDC42 small effector 2                                                                                | Cdc42se2               | 1.51±0.45  |
| CDC42 small effector 2 /// hypothetical protein LOC691031                                             | Cdc42se2 /// LOC691031 | 0.32±0.04  |
| CDC91 cell division cycle 91-like 1 (S. cerevisiae)                                                   | Cdc9111                | 1.5±0.25   |
| CDC-like kinase 1                                                                                     | Clk1                   | 7.91±1.95  |
| CDC-like kinase 2                                                                                     | Clk2                   | 0.82±0.57  |
| CDC-like kinase 3                                                                                     | Clk3                   | 1.09±0.23  |

|                                                                                                                                        |                        |            |
|----------------------------------------------------------------------------------------------------------------------------------------|------------------------|------------|
| CDGSH iron sulfur domain 1                                                                                                             | Cisd1                  | 34.2±1.65  |
| CDGSH iron sulfur domain 2                                                                                                             | Cisd2                  | 2.83±0.62  |
| CDK105 protein                                                                                                                         | Cdk105                 | 5.75±0.13  |
| CDK2 (cyclin-dependent kinase 2)-associated protein 1 (predicted) /// similar to CDK2 (cyclin-dependent kinase 2)-associated protein 1 | Cdk2ap1_predicted ///  | 14.8±0.38  |
| Cdk5 and Abl enzyme substrate 1 (predicted)                                                                                            | Cables1_predicted      | 1.51±0.29  |
| CDK5 regulatory subunit associated protein 1-like 1 (predicted)                                                                        | Cdkal1_predicted       | 0.63±0.16  |
| CDK5 regulatory subunit associated protein 2                                                                                           | Cdk5rap2               | 1.02±0.27  |
| CDKN1A interacting zinc finger protein 1 (predicted)                                                                                   | Ciz1_predicted         | 1.75±0.55  |
| CDKN2A interacting protein                                                                                                             | Cdkn2aip               | 0.65±0.46  |
| CDKN2A interacting protein N-terminal like                                                                                             | Cdkn2aipnl             | 1.25±0.09  |
| CDNA BC060737 (predicted)                                                                                                              | BC060737_predicted     | 0.37±0.18  |
| CDP-diacylglycerol synthase 1                                                                                                          | Cds1                   | 3.89±0.18  |
| CDP-diacylglycerol--inositol 3-phosphatidyltransferase (phosphatidylinositol synthase)                                                 | Cdipt                  | 7.83±0.31  |
| CDW92 antigen                                                                                                                          | Cdw92                  | 4.88±0.63  |
| cell adhesion molecule 1                                                                                                               | Cadm1                  | 1.12±0.01  |
| cell adhesion molecule JCAM                                                                                                            | LOC304000              | 6.26±0.13  |
| cell cycle associated protein 1                                                                                                        | Caprin1                | 7.78±2.69  |
| cell cycle progression 1 (predicted)                                                                                                   | Ccp1_predicted         | 1.87±0.38  |
| cell death-inducing DNA fragmentation factor, alpha subunit-like effector A (predicted)                                                | Cidea_predicted        | 1.73±1.05  |
| cell division cycle 123 homolog (S. cerevisiae)                                                                                        | Cdc123                 | 2.03±0.4   |
| cell division cycle 2 homolog (S.pombe)-like 1                                                                                         | Cdc211                 | 0.27±0     |
| cell division cycle 2 homolog (S.pombe)-like 1 /// similar to cell division cycle 2-like 1 (predicted)                                 | Cdc211 /// RGD156635   | 2.06±0.16  |
| cell division cycle 2 homolog A (S. pombe)                                                                                             | Cdc2a                  | 1.22±0.02  |
| cell division cycle 20 homolog (S. cerevisiae)                                                                                         | Cdc20                  | 0.92±0.01  |
| cell division cycle 25 homolog A (S. pombe)                                                                                            | Cdc25a                 | 0.26±0.02  |
| cell division cycle 26                                                                                                                 | Cdc26                  | 1.07±0.04  |
| cell division cycle 2-like 5 (cholinesterase-related cell division controller)                                                         | Cdc2l5                 | 1.36±0.46  |
| cell division cycle 2-like 6 (CDK8-like) (predicted)                                                                                   | Cdc2l6_predicted       | 2.64±0.59  |
| cell division cycle 34 homolog (S. cerevisiae) (predicted)                                                                             | Cdc34_predicted        | 2.9±0.53   |
| cell division cycle 37 homolog (S. cerevisiae)                                                                                         | Cdc37                  | 6.64±0.12  |
| cell division cycle 37 homolog (S. cerevisiae)-like 1                                                                                  | Cdc37l1                | 1.79±0.23  |
| cell division cycle 40 homolog (yeast) (predicted)                                                                                     | Cdc40_predicted        | 0.85±0.22  |
| cell division cycle 42 homolog (S. cerevisiae)                                                                                         | Cdc42                  | 17.09±1.58 |
| cell division cycle 45 homolog (S. cerevisiae)-like                                                                                    | Cdc45l                 | 0.34±0.31  |
| cell division cycle 5-like (S. pombe)                                                                                                  | Cdc5l                  | 3.28±0.53  |
| cell division cycle 73, Paf1/RNA polymerase II complex component, homolog (S. cerevisiae)                                              | Cdc73                  | 3.7±0.36   |
| cell division cycle and apoptosis regulator 1                                                                                          | Ccar1                  | 3.18±0.32  |
| cell division cycle associated 3                                                                                                       | Cdca3                  | 1.55±0.53  |
| cell division cycle associated 4                                                                                                       | Cdca4                  | 1.71±0.49  |
| cell division cycle associated 7 like                                                                                                  | Cdca7l                 | 0.72±0.14  |
| cell growth regulator with ring finger domain 1                                                                                        | Cgrrf1                 | 2.42±0.18  |
| cellular nucleic acid binding protein                                                                                                  | Cnbp                   | 12.42±1.29 |
| cellular repressor of E1A-stimulated genes 1                                                                                           | Creg1                  | 13.58±6.82 |
| centaurin, alpha 1                                                                                                                     | Centa1                 | 1.37±0.24  |
| centaurin, beta 5 (predicted)                                                                                                          | Centb5_predicted       | 0.58±0.02  |
| centaurin, delta 1 (predicted)                                                                                                         | Centd1_predicted       | 0.21±0.2   |
| centaurin, delta 2                                                                                                                     | Centd2                 | 1.04±0.16  |
| centaurin, gamma 2 (predicted)                                                                                                         | Centg2_predicted       | 2.82±0.47  |
| centrin 2                                                                                                                              | Cetn2                  | 9.26±0.98  |
| centrin 3                                                                                                                              | Cetn3                  | 3.55±0.16  |
| centrin 4                                                                                                                              | Cetn4                  | 0.26±0.06  |
| centrobin, centrosomal BRCA2 interacting protein (predicted)                                                                           | Cntrob_predicted       | 0.28±0.08  |
| centromere protein B                                                                                                                   | Cenpb                  | 2.32±0.32  |
| centromere protein I                                                                                                                   | Cenpi                  | 0.29±0     |
| centromere protein J (predicted)                                                                                                       | Cenpj_predicted        | 0.36±0.08  |
| centromere protein K                                                                                                                   | Cenpk                  | 0.32±0.01  |
| centromere protein L                                                                                                                   | Cenpl                  | 0.83±0.17  |
| centromere protein N                                                                                                                   | Cenpn                  | 0.49±0.13  |
| centromere protein Q                                                                                                                   | Cenpq                  | 0.25±0.02  |
| centrosomal protein 110                                                                                                                | Cep110                 | 0.77±0     |
| centrosomal protein 152 (predicted)                                                                                                    | Cep152_predicted       | 0.28±0.1   |
| centrosomal protein 250                                                                                                                | Cep250                 | 0.59±0.05  |
| centrosomal protein 27 (predicted)                                                                                                     | Cep27_predicted        | 1.02±0.2   |
| centrosomal protein 27 (predicted) /// similar to Centrosomal protein of 27 kDa (Cep27 protein)                                        | Cep27_predicted /// LO | 0.84±0.13  |
| centrosomal protein 57                                                                                                                 | Cep57                  | 0.9±0.19   |
| centrosomal protein 68 (predicted)                                                                                                     | Cep68_predicted        | 1.32±0.48  |
| centrosomal protein 70                                                                                                                 | Cep70                  | 1.91±0.46  |
| cereblon                                                                                                                               | Crbn                   | 1.45±0.09  |
| ceroid lipofuscinosis, neuronal 3, juvenile (Batten, Spielmeier-Vogt disease)                                                          | Cln3                   | 2.74±0.43  |
| ceroid-lipofuscinosis, neuronal 5 (predicted)                                                                                          | Cln5_predicted         | 0.3±0.04   |
| ceroid-lipofuscinosis, neuronal 8                                                                                                      | Cln8                   | 0.69±0.09  |
| CGG triplet repeat binding protein 1 (predicted)                                                                                       | Cggbp1_predicted       | 2.95±0.42  |
| CGI-96 protein                                                                                                                         | Cgi-96                 | 0.35±0.09  |
| ChaC, cation transport regulator homolog 2 (E. coli)                                                                                   | Chac2                  | 1.1±0.43   |
| ChaC, cation transport regulator-like 1 (E. coli) (predicted)                                                                          | Chac1_predicted        | 0.43±0.15  |
| chaperonin containing TCP1, subunit 2 (beta)                                                                                           | Cct2                   | 6.69±0.79  |
| chaperonin subunit 3 (gamma)                                                                                                           | Cct3                   | 7.99±1.37  |
| chaperonin subunit 4 (delta)                                                                                                           | Cct4                   | 10.75±1.42 |
| chaperonin subunit 5 (epsilon)                                                                                                         | Cct5                   | 12.43±2.53 |
| chaperonin subunit 6a (zeta) /// similar to chaperonin subunit 6a (zeta)                                                               | Cct6a /// LOC316484 // | 2.55±0.25  |
| chaperonin subunit 7 (eta) (predicted)                                                                                                 | Cct7_predicted         | 8.52±0.41  |
| chaperonin subunit 8 (theta) (predicted)                                                                                               | Cct8_predicted         | 4.81±1.21  |
| checkpoint kinase 1 homolog (S. pombe)                                                                                                 | Chek1                  | 0.39±0.1   |
| Checkpoint suppressor 1 (predicted)                                                                                                    | Ches1_predicted        | 1.01±0.2   |
| checkpoint with forkhead and ring finger domains                                                                                       | Chfr                   | 1.31±0.33  |
| chemokine (C-C motif) ligand 27 (predicted)                                                                                            | Ccl27_predicted        | 0.54±0.14  |
| chemokine (C-X3-C motif) ligand 1                                                                                                      | Cx3cl1                 | 0.73±0.81  |

|                                                                                 |                  |            |
|---------------------------------------------------------------------------------|------------------|------------|
| chemokine (C-X-C motif) ligand 11                                               | Cxcl11           | 0.9±1.2    |
| chemokine (C-X-C motif) ligand 12                                               | Cxcl12           | 9.4±0.78   |
| chemokine (C-X-C motif) ligand 16                                               | Cxcl16           | 2.95±0.75  |
| chibby homolog 1 (Drosophila)                                                   | Cby1             | 2.49±0.7   |
| chimerin (chimaerin) 1                                                          | Chn1             | 0.28±0.13  |
| chitinase domain containing 1                                                   | Chid1            | 0.82±0.2   |
| chitinase, di-N-acetyl-                                                         | Ctbs             | 1.38±0.06  |
| chloride channel 2                                                              | Clcn2            | 0.22±0.11  |
| chloride channel 3                                                              | Clcn3            | 5.92±0.01  |
| chloride channel 4-2                                                            | Clcn4-2          | 8.75±2.97  |
| Chloride channel 6 (predicted)                                                  | Clcn6_predicted  | 0.59±0.4   |
| chloride channel 7                                                              | Clcn7            | 0.28±0.05  |
| chloride channel calcium activated 5                                            | Clca5            | 0.34±0.13  |
| chloride channel CLIC-like 1                                                    | Clcc1            | 0.95±0.08  |
| chloride channel Ka                                                             | Clcnka           | 15.78±4.17 |
| chloride channel Kb                                                             | Clcnkb           | 15.84±0.49 |
| chloride channel, nucleotide-sensitive, 1A                                      | Clns1a           | 2.67±0.58  |
| chloride intracellular channel 1                                                | Clc1             | 16.8±1.28  |
| CHMP family, member 7 (predicted)                                               | Chmp7_predicted  | 2.21±0.45  |
| cholecystokinin                                                                 | Cck              | 0.23±0.19  |
| choline kinase alpha                                                            | Chka             | 1.96±1.17  |
| choline kinase beta                                                             | Chkb             | 4.53±0.16  |
| choline phosphotransferase 1                                                    | Chpt1            | 7.34±2.21  |
| choline/ethanolamine phosphotransferase 1                                       | Cept1            | 3.81±0.01  |
| chondroitin sulfate N-acetylgalactosaminyltransferase 2                         | Csgalnact2       | 0.87±0.16  |
| chondroitin sulfate proteoglycan 4                                              | Cspg4            | 1.34±0.21  |
| choroideremia                                                                   | Chm              | 0.48±0.23  |
| chromatin accessibility complex 1 (predicted)                                   | Chrac1_predicted | 3±0.47     |
| chromatin assembly factor 1, subunit B (p60)                                    | Chaf1b           | 0.42±0.13  |
| chromatin licensing and DNA replication factor 1                                | Cdt1             | 0.62±0.26  |
| chromatin modifying protein 1A                                                  | Chmp1a           | 2.24±0.07  |
| chromatin modifying protein 1B                                                  | Chmp1b           | 1.51±0.3   |
| chromatin modifying protein 2B                                                  | Chmp2b           | 2.63±0.56  |
| chromatin modifying protein 4C                                                  | Chmp4c           | 0.68±0.8   |
| chromatin modifying protein 5                                                   | Chmp5            | 16.66±2.15 |
| chromatin modifying protein 6 (predicted)                                       | Chmp6_predicted  | 2.01±0.56  |
| chromobox homolog 1 (Drosophila HP1 beta) (predicted)                           | Cbx1_predicted   | 3.4±2.13   |
| chromobox homolog 2 (Drosophila Pc class)                                       | Cbx2             | 0.44±0.01  |
| chromobox homolog 3 (HP1 gamma homolog, Drosophila)                             | Cbx3             | 8.48±1.25  |
| chromobox homolog 5 (Drosophila HP1a) (predicted)                               | Cbx5_predicted   | 1.12±0.59  |
| chromobox homolog 6                                                             | Cbx6             | 4.57±1.62  |
| chromobox homolog 7                                                             | Cbx7             | 1.72±0.21  |
| chromodomain helicase DNA binding protein 1 (predicted)                         | Chd1_predicted   | 1.86±0.29  |
| Chromodomain helicase DNA binding protein 2 (predicted)                         | Chd2_predicted   | 2.27±0.04  |
| Chromodomain helicase DNA binding protein 3                                     | Chd3             | 0.67±0.41  |
| chromodomain helicase DNA binding protein 4                                     | Chd4             | 5.04±0.25  |
| chromodomain helicase DNA binding protein 6 (predicted)                         | Chd6_predicted   | 0.42±0.02  |
| chromodomain helicase DNA binding protein 7 (predicted)                         | Chd7_predicted   | 0.92±0.07  |
| chromodomain helicase DNA binding protein 8                                     | Chd8             | 2.18±0.18  |
| chromosome segregation 1-like (S. cerevisiae) (predicted)                       | Cse1_predicted   | 2.41±1.12  |
| chromosome transmission fidelity factor 8 homolog (S. cerevisiae)               | Ctf8             | 1.5±0.16   |
| churchill domain containing 1 (predicted)                                       | Churc1_predicted | 7.08±1.69  |
| ciliary rootlet coiled-coil, rootletin (predicted)                              | Crocc_predicted  | 1.13±0.22  |
| cingulin (predicted)                                                            | Cgn_predicted    | 1.78±0.17  |
| cingulin-like 1                                                                 | Cgn1             | 35.96±1.95 |
| cirrhosis, autosomal recessive 1A (human)                                       | Cirh1a           | 1.12±0.06  |
| cisplatin resistance-associated overexpressed protein                           | Crop             | 8.32±0.7   |
| citrate lyase beta like                                                         | Clybl            | 2.18±1.19  |
| Citrate synthase                                                                | Cs               | 26.63±3.33 |
| Citron                                                                          | Cit              | 1.92±0.25  |
| CKLF-like MARVEL transmembrane domain containing 6                              | Cmtm6            | 3.63±0.89  |
| CKLF-like MARVEL transmembrane domain containing 7                              | Cmtm7            | 0.97±0.08  |
| CKLF-like MARVEL transmembrane domain containing 8                              | Cmtm8            | 0.29±0.26  |
| clathrin, heavy polypeptide (Hc)                                                | Cltc             | 14.8±1.68  |
| clathrin, light polypeptide (Lca)                                               | Cltla            | 17.11±0.05 |
| clathrin, light polypeptide (Lcb)                                               | Cltb             | 2.75±0.49  |
| claudin 10 (predicted)                                                          | Cldn10_predicted | 46.93±2.56 |
| claudin 12                                                                      | Cldn12           | 1.07±0.22  |
| claudin 16                                                                      | Cldn16           | 8.91±0.01  |
| claudin 19                                                                      | Cldn19           | 14.28±2.39 |
| claudin 3                                                                       | Cldn3            | 1.62±0.96  |
| claudin 5                                                                       | Cldn5            | 0.66±2.44  |
| claudin 6 (predicted)                                                           | Cldn6_predicted  | 0.32±0.08  |
| claudin 7                                                                       | Cldn7            | 2.52±0.16  |
| claudin 8                                                                       | Cldn8            | 4.23±0.18  |
| claudin domain containing 1                                                     | Cldnd1           | 3.21±0.29  |
| cleavage and polyadenylation factor subunit homolog (S. cerevisiae) (predicted) | Pcf11_predicted  | 1.18±0.28  |
| cleavage and polyadenylation specific factor 1                                  | Cpsf1            | 0.46±0.39  |
| cleavage and polyadenylation specific factor 2 (predicted)                      | Cpsf2_predicted  | 2.4±0.34   |
| cleavage and polyadenylation specific factor 3-like                             | Cpsf3            | 1.24±0.3   |
| cleavage and polyadenylation specific factor 5                                  | Cpsf5            | 3.5±0.49   |
| cleavage and polyadenylation specific factor 6                                  | Cpsf6            | 4.68±0.1   |
| cleavage and polyadenylation specificity factor 3                               | Cpsf3            | 2.41±0.54  |
| cleavage stimulation factor, 3' pre-RNA subunit 2, tau (predicted)              | Cstf2t_predicted | 7.66±2.4   |
| cleavage stimulation factor, 3' pre-RNA, subunit 1                              | Cstf1            | 0.64±0.05  |
| cleft lip and palate associated transmembrane protein 1 (predicted)             | Ciptm1_predicted | 4.45±0.94  |
| CLIP associating protein 2                                                      | Clasp2           | 1.24±0.02  |

|                                                                              |                        |            |
|------------------------------------------------------------------------------|------------------------|------------|
| CLP1, cleavage and polyadenylation factor I subunit, homolog (S. cerevisiae) | Clp1                   | 0.49±0.08  |
| ClpB caseinolytic peptidase B homolog (E. coli)                              | Clpb                   | 2.98±0.31  |
| CLPTM1-like                                                                  | Clptm1                 | 8.96±0.55  |
| clusterin associated protein 1                                               | Cluap1                 | 1.88±0.44  |
| c-Maf-inducing protein                                                       | Cmip                   | 0.95±0.51  |
| Cnksr family member 3                                                        | Cnksr3                 | 0.71±0.7   |
| coagulation factor II (thrombin) receptor                                    | F2r                    | 18.56±1.08 |
| coagulation factor II (thrombin) receptor-like 1                             | F2rl1                  | 1.16±0.38  |
| coagulation factor III                                                       | F3                     | 1.04±0.79  |
| coagulation factor V                                                         | F5                     | 4.04±6.57  |
| coatmer protein complex subunit alpha                                        | Copa                   | 10.52±0.96 |
| coatmer protein complex, subunit beta 1                                      | Copb1                  | 5.57±1.15  |
| coatmer protein complex, subunit beta 2 (beta prime)                         | Copb2                  | 9.09±2.16  |
| coatmer protein complex, subunit epsilon (predicted)                         | Cope_predicted         | 5.73±1.02  |
| coatmer protein complex, subunit gamma                                       | Copg                   | 4.49±1.76  |
| coatmer protein complex, subunit zeta 1 (predicted)                          | Copz1_predicted        | 8.8±0.56   |
| coatmer protein complex, subunit zeta 2 (predicted)                          | Copz2_predicted        | 1.65±0.36  |
| Cobl-like 1 (predicted)                                                      | Cobl1_predicted        | 11.4±1.52  |
| COBW domain containing 1                                                     | Cbwd1                  | 0.47±0.05  |
| Coenzyme A synthase                                                          | Coasy                  | 1.2±0.05   |
| coenzyme Q10 homolog A (yeast) (predicted)                                   | Coq10a_predicted       | 1.36±0.1   |
| coenzyme Q10 homolog B (S. cerevisiae)                                       | Coq10b                 | 3.22±0.61  |
| coenzyme Q2 homolog, prenyltransferase (yeast)                               | Coq2                   | 0.82±0.07  |
| coenzyme Q3 homolog, methyltransferase (yeast)                               | Coq3                   | 2.49±0.4   |
| coenzyme Q4 homolog (yeast)                                                  | Coq4                   | 0.69±0.02  |
| coenzyme Q5 homolog, methyltransferase (yeast)                               | Coq5                   | 0.96±0.3   |
| Coenzyme Q6 homolog (yeast)                                                  | Coq6                   | 0.49±1.4   |
| cofactor of BRCA1                                                            | Cobra1                 | 2.21±0.51  |
| cofilin 1, non-muscle                                                        | Cfl1                   | 6.01±0.12  |
| cofilin 1, non-muscle                                                        | Cfl1 /// LOC502589 /// | 0.63±0.02  |
| cofilin 2, muscle (predicted)                                                | Cfl2_predicted         | 8.42±1.95  |
| Cohen syndrome homolog 1 (predicted)                                         | Cohh1_predicted        | 2.84±0.67  |
| coiled-coil and C2 domain containing 1A                                      | Cc2d1a                 | 0.86±0.26  |
| coiled-coil and C2 domain containing 1B                                      | Cc2d1b                 | 1.31±0.07  |
| coiled-coil domain containing 100                                            | Ccdc100                | 1.25±0.3   |
| coiled-coil domain containing 101                                            | Ccdc101                | 0.69±0.11  |
| coiled-coil domain containing 104                                            | Ccdc104                | 1.6±0.81   |
| coiled-coil domain containing 107                                            | Ccdc107                | 0.9±0.11   |
| coiled-coil domain containing 113                                            | Ccdc113                | 0.3±0.01   |
| coiled-coil domain containing 115                                            | Ccdc115                | 0.37±0.04  |
| coiled-coil domain containing 117                                            | Ccdc117                | 3±0.56     |
| coiled-coil domain containing 12 (predicted)                                 | Ccdc12_predicted       | 1.17±0.07  |
| coiled-coil domain containing 124                                            | Ccdc124                | 3±0.43     |
| coiled-coil domain containing 125                                            | Ccdc125                | 1.59±0.39  |
| coiled-coil domain containing 126                                            | Ccdc126                | 1.63±0.32  |
| coiled-coil domain containing 127                                            | Ccdc127                | 0.79±0.34  |
| coiled-coil domain containing 130                                            | Ccdc130                | 0.6±0.05   |
| coiled-coil domain containing 132                                            | Ccdc132                | 1.85±0.34  |
| coiled-coil domain containing 16                                             | Ccdc16                 | 1.05±0.17  |
| coiled-coil domain containing 17                                             | Ccdc17                 | 1.04±0.12  |
| coiled-coil domain containing 21                                             | Ccdc21                 | 1.49±0.35  |
| coiled-coil domain containing 22 (predicted)                                 | Ccdc22_predicted       | 1.86±0.18  |
| coiled-coil domain containing 23                                             | Ccdc23                 | 1.62±0.42  |
| coiled-coil domain containing 28A                                            | Ccdc28a                | 1±0.11     |
| coiled-coil domain containing 34                                             | Ccdc34                 | 0.27±0.04  |
| coiled-coil domain containing 41                                             | Ccdc41                 | 0.96±0.12  |
| coiled-coil domain containing 43                                             | Ccdc43                 | 1.23±0.11  |
| coiled-coil domain containing 45                                             | Ccdc45                 | 0.61±0.29  |
| coiled-coil domain containing 49 (predicted)                                 | Ccdc49_predicted       | 0.42±0.09  |
| coiled-coil domain containing 5                                              | Ccdc5                  | 0.37±0.02  |
| coiled-coil domain containing 51                                             | Ccdc51                 | 1.01±0.07  |
| coiled-coil domain containing 52                                             | Ccdc52                 | 0.28±0     |
| coiled-coil domain containing 53 (predicted)                                 | Ccdc53_predicted       | 9.51±0.46  |
| coiled-coil domain containing 55                                             | Ccdc55                 | 0.32±0.07  |
| coiled-coil domain containing 56                                             | Ccdc56                 | 13.07±1.9  |
| coiled-coil domain containing 58 (predicted)                                 | Ccdc58_predicted       | 2.26±0.33  |
| coiled-coil domain containing 59 (predicted)                                 | Ccdc59_predicted       | 0.36±0.24  |
| coiled-coil domain containing 64                                             | Ccdc64                 | 5.49±0.28  |
| coiled-coil domain containing 65                                             | Ccdc65                 | 0.52±0.15  |
| coiled-coil domain containing 68                                             | Ccdc68                 | 0.39±0.01  |
| coiled-coil domain containing 72 /// hypothetical protein LOC685117          | Ccdc72 /// LOC685117   | 15.95±2.78 |
| coiled-coil domain containing 84                                             | Ccdc84                 | 0.77±0.1   |
| coiled-coil domain containing 86                                             | Ccdc86                 | 0.49±0.09  |
| coiled-coil domain containing 90B                                            | Ccdc90b                | 2.27±0.04  |
| coiled-coil domain containing 91                                             | Ccdc91                 | 0.82±0.02  |
| coiled-coil domain containing 92                                             | Ccdc92                 | 1.02±0.25  |
| coiled-coil domain containing 93                                             | Ccdc93                 | 0.48±0.1   |
| coiled-coil domain containing 97                                             | Ccdc97                 | 1.15±0.19  |
| coiled-coil domain containing 98                                             | Ccdc98                 | 0.28±0.05  |
| coiled-coil-helix-coiled-coil-helix domain containing 1 (predicted)          | Chchd1_predicted       | 5.4±0.1    |
| coiled-coil-helix-coiled-coil-helix domain containing 2                      | Chchd2                 | 24.51±1.59 |
| coiled-coil-helix-coiled-coil-helix domain containing 3 (predicted)          | Chchd3_predicted       | 17.25±4.35 |
| coiled-coil-helix-coiled-coil-helix domain containing 4                      | Chchd4                 | 1±0.28     |
| coiled-coil-helix-coiled-coil-helix domain containing 5 (predicted)          | Chchd5_predicted       | 1.68±0.16  |
| coiled-coil-helix-coiled-coil-helix domain containing 6 (predicted)          | Chchd6_predicted       | 1.81±0.6   |
| coiled-coil-helix-coiled-coil-helix domain containing 8                      | Chchd8                 | 0.78±0.38  |
| cold inducible RNA binding protein                                           | Cirbp                  | 1.23±0.37  |

|                                                                                                    |                            |             |
|----------------------------------------------------------------------------------------------------|----------------------------|-------------|
| cold shock domain containing E1, RNA binding                                                       | Csde1                      | 12.78±2.43  |
| cold shock domain protein A                                                                        | Csda                       | 2.32±0.27   |
| collagen, type IV, alpha 5                                                                         | Col4a5                     | 9.92±1.93   |
| colony stimulating factor 1 (macrophage)                                                           | Csf1                       | 1.74±0.07   |
| COMM domain containing 10                                                                          | Commmd10                   | 3.84±0.67   |
| COMM domain containing 2                                                                           | Commmd2                    | 1.95±0.05   |
| COMM domain containing 3                                                                           | Commmd3                    | 12.51±0.51  |
| COMM domain containing 4 (predicted)                                                               | Commmd4_predicted          | 2.14±0.04   |
| COMM domain containing 5                                                                           | Commmd5                    | 1.21±0.17   |
| COMM domain containing 6                                                                           | Commmd6                    | 2.31±0.33   |
| COMM domain containing 7                                                                           | Commmd7                    | 0.88±0.1    |
| COMM domain containing 8 (predicted)                                                               | Commmd8_predicted          | 4.91±0.84   |
| COMM domain containing 9                                                                           | Commmd9                    | 4.54±0.68   |
| complement component (3b/4b) receptor 1-like                                                       | Cr1l                       | 3.15±0.03   |
| complement component 1, q subcomponent binding protein                                             | C1qbp                      | 13.48±0.96  |
| complement component 2                                                                             | Bat4 /// C2 /// C4a /// Cf | 2.18±0.52   |
| complement component 5                                                                             | C5                         | 4.54±0.79   |
| complement component 8, gamma subunit                                                              | C8g                        | 0.41±0.01   |
| component of oligomeric golgi complex 1 (predicted)                                                | Cog1_predicted             | 1.69±0.23   |
| component of oligomeric golgi complex 3                                                            | Cog3                       | 1.29±0.26   |
| component of oligomeric golgi complex 4 (predicted)                                                | Cog4_predicted             | 1.78±0      |
| component of oligomeric golgi complex 6                                                            | Cog6                       | 1.86±0.37   |
| component of oligomeric golgi complex 7                                                            | Cog7                       | 1.25±0.05   |
| connector enhancer of kinase suppressor of Ras 1                                                   | Cnksr1                     | 0.97±0.38   |
| conserved helix-loop-helix ubiquitous kinase (predicted)                                           | Chuk_predicted             | 5.48±0.29   |
| conserved nuclear protein Nhn1                                                                     | Nhn1                       | 0.54±0.4    |
| COP9 (constitutive photomorphogenic) homolog, subunit 2 (Arabidopsis thaliana)                     | Cops2                      | 5.47±0.41   |
| COP9 (constitutive photomorphogenic) homolog, subunit 3 (Arabidopsis thaliana)                     | Cops3                      | 5.19±1.25   |
| COP9 (constitutive photomorphogenic) homolog, subunit 4 (Arabidopsis thaliana)                     | Cops4                      | 7.26±1.37   |
| COP9 (constitutive photomorphogenic) homolog, subunit 5 (Arabidopsis thaliana)                     | Cops5                      | 4.5±0.83    |
| COP9 (constitutive photomorphogenic) homolog, subunit 6 (Arabidopsis thaliana) (predicted)         | Cops6_predicted            | 9.89±0.08   |
| COP9 (constitutive photomorphogenic) homolog, subunit 7a (Arabidopsis thaliana) (predicted)        | Cops7a_predicted           | 3.27±0.81   |
| COP9 (constitutive photomorphogenic) homolog, subunit 7b (Arabidopsis thaliana) (predicted)        | Cops7b_predicted           | 0.86±0.02   |
| COP9 (constitutive photomorphogenic) homolog, subunit 8 (Arabidopsis thaliana)                     | Cops8                      | 4.17±0.57   |
| Copine III (predicted)                                                                             | Cpne3_predicted            | 5.48±0.22   |
| copper chaperone for superoxide dismutase                                                          | Ccs                        | 1.69±0.12   |
| copper metabolism (Murr1) domain containing 1 (predicted)                                          | Commmd1_predicted          | 4.59±1.32   |
| coproporphyrinogen oxidase                                                                         | Cpox                       | 3.63±0.66   |
| cordón-bleu (predicted)                                                                            | Cobl_predicted             | 3.34±0.02   |
| core 1 synthase, glycoprotein-N-acetylgalactosamine 3-beta-galactosyltransferase, 1                | C1galt1                    | 0.73±0.14   |
| core binding factor beta                                                                           | Cbfb                       | 2.85±0.26   |
| cornichon homolog (Drosophila) (predicted)                                                         | Cnih_predicted             | 4.53±1.56   |
| cornichon homolog 4 (Drosophila)                                                                   | Cnih4                      | 1.65±0.06   |
| coronin 7                                                                                          | Coro7                      | 0.43±0.04   |
| coronin, actin binding protein 6                                                                   | Coro6                      | 1.39±0.17   |
| coronin, actin-binding protein, 1B                                                                 | Coro1b                     | 2.1±0.1     |
| cortactin                                                                                          | Ctn                        | 1.54±0.33   |
| cortistatin /// kinesin family member 1B                                                           | Cort /// Kif1b             | 0.5±0.01    |
| cortistatin /// phosphogluconate dehydrogenase                                                     | Cort /// Pgd               | 3.22±0.38   |
| COX15 homolog, cytochrome c oxidase assembly protein (yeast)                                       | Cox15                      | 2.98±0.37   |
| COX18 cytochrome c oxidase assembly homolog (S. cerevisiae)                                        | Cox18                      | 1.83±0.05   |
| COX19 cytochrome c oxidase assembly homolog (S. cerevisiae)                                        | Cox19                      | 2.78±0.09   |
| COX4 neighbor                                                                                      | Cox4nb                     | 1.93±0.3    |
| COXII /// cytochrome c oxidase subunit 3                                                           | COX2 /// COX3              | 83.38±17.95 |
| CP110 protein                                                                                      | Cp110                      | 0.51±0.02   |
| craniofacial development protein 1                                                                 | Cfdp1                      | 3.03±0.52   |
| creatine kinase, brain                                                                             | Kcb                        | 19.7±4.61   |
| creatine kinase, mitochondrial 1, ubiquitous                                                       | Ckmt1                      | 16.54±3.29  |
| CREB binding protein                                                                               | Crebbp                     | 1.81±0.03   |
| CREB regulated transcription coactivator 2                                                         | Crtc2                      | 0.59±0.27   |
| Crn, crooked neck-like 1 (Drosophila)                                                              | Crnk1                      | 0.87±0.26   |
| crumbs homolog 3 (Drosophila)                                                                      | Crb3                       | 3.52±0.37   |
| cryptochrome 1 (photolyase-like)                                                                   | Cry1                       | 0.43±0.19   |
| crystallin, alpha B                                                                                | Cryab                      | 4.02±20.49  |
| crystallin, mu                                                                                     | Crym                       | 6.45±0.8    |
| crystallin, zeta                                                                                   | Cryz                       | 1.35±2.01   |
| crystallin, zeta (quinone reductase)-like 1                                                        | Cryz1                      | 1.32±0.17   |
| c-src tyrosine kinase                                                                              | Csk                        | 1.69±0.64   |
| CTAGE family, member 5                                                                             | Ctage5                     | 5.56±0.23   |
| CTD (carboxy-terminal domain, RNA polymerase II, polypeptide A) phosphatase, subunit 1 (predicted) | Ctdp1_predicted            | 1.34±0.34   |
| CTD (carboxy-terminal domain, RNA polymerase II, polypeptide A) small phosphatase 1                | Ctdsp1                     | 6.13±0.08   |
| CTD (carboxy-terminal domain, RNA polymerase II, polypeptide A) small phosphatase-like (predicted) | Ctdspl_predicted           | 5.13±2.03   |
| CTD-binding SR-like protein rA9                                                                    | LOC245925                  | 1.45±0.21   |
| C-terminal binding protein 1                                                                       | Ctbp1                      | 5.6±0.27    |
| C-terminal binding protein 2                                                                       | Ctbp2                      | 3.11±1.66   |
| Ctr9, Paf1/RNA polymerase II complex component, homolog (S. cerevisiae)                            | Ctr9                       | 1.05±0.1    |
| CTTNBP2 N-terminal like (predicted)                                                                | Cttbnp2nl_predicted        | 2.8±0.19    |
| C-type lectin domain family 11, member a                                                           | Clec11a                    | 0.31±0.09   |
| C-type lectin domain family 16, member A                                                           | Clec16a                    | 2.17±0.65   |
| CUB domain containing protein 1 (predicted)                                                        | Cdcp1_predicted            | 1.1±0.1     |
| CUE domain containing 1                                                                            | Cuedc1                     | 0.67±0.05   |
| CUE domain containing 2 (predicted)                                                                | Cuedc2_predicted           | 1.13±0.17   |
| CUG triplet repeat, RNA binding protein 1                                                          | Cugbp1                     | 2±0.46      |
| CUG triplet repeat, RNA binding protein 2                                                          | Cugbp2                     | 0.2±0.23    |
| cullin 1 (predicted)                                                                               | Cul1_predicted             | 4.05±0.11   |
| cullin 2 (predicted)                                                                               | Cul2_predicted             | 0.46±0.05   |
| cullin 3 (predicted)                                                                               | Cul3_predicted             | 8.77±0.84   |

|                                                                                                          |                      |            |
|----------------------------------------------------------------------------------------------------------|----------------------|------------|
| Cullin 4B (predicted)                                                                                    | Cul4b_predicted      | 2.24±0.18  |
| cullin 5                                                                                                 | Cul5                 | 0.24±0.04  |
| cullin associated and neddylation disassociated 1                                                        | Cand1                | 4.75±0.83  |
| cullin-associated and neddylation-dissociated 2 (putative)                                               | Cand2                | 1.24±0.17  |
| cutA divalent cation tolerance homolog (E. coli)                                                         | Cuta                 | 10.12±2.4  |
| cutC copper transporter homolog (E.coli) (predicted)                                                     | Cutc_predicted       | 0.84±0.13  |
| cut-like homeobox 1                                                                                      | Cux1                 | 1.75±0.28  |
| CWC15 homolog (S. cerevisiae)                                                                            | Cwc15                | 4.47±0.35  |
| CXXC finger 1 (PHD domain)                                                                               | Cxxc1                | 1.63±0.93  |
| CXXC finger 5                                                                                            | Cxxc5                | 11.7±0.03  |
| cyclin A2                                                                                                | Ccna2                | 0.62±0.14  |
| cyclin B1                                                                                                | Ccnb1                | 0.82±0.13  |
| cyclin B2                                                                                                | Ccnb2                | 1.46±0.38  |
| cyclin C                                                                                                 | Ccnc                 | 2.68±0.55  |
| cyclin D binding myb-like transcription factor 1 /// hypothetical gene supported by AF352170 (predicted) | Dmtf1 /// RGD1562889 | 2.33±0.5   |
| cyclin D1                                                                                                | Ccnd1                | 7.71±3.57  |
| cyclin D3                                                                                                | Ccnd3                | 2.52±0.26  |
| cyclin dependent kinase 2                                                                                | Cdk2                 | 1.03±0.02  |
| cyclin D-type binding-protein 1                                                                          | Ccndbp1              | 2.47±0.03  |
| cyclin E1                                                                                                | Ccne1                | 0.34±0.15  |
| cyclin G associated kinase                                                                               | Gak                  | 3.08±0.64  |
| cyclin G1                                                                                                | Ccng1                | 5.12±2.09  |
| cyclin G2 (predicted)                                                                                    | Ccng2_predicted      | 1.21±0.63  |
| cyclin H                                                                                                 | Ccnh                 | 2.88±0.2   |
| cyclin I (predicted)                                                                                     | Ccni_predicted       | 15.92±2.02 |
| cyclin J (predicted)                                                                                     | Ccnj_predicted       | 0.23±0.05  |
| cyclin K                                                                                                 | Ccnk                 | 1.38±0.06  |
| cyclin L1                                                                                                | Ccnl1                | 0.87±2.58  |
| cyclin L2                                                                                                | Ccnl2                | 2.48±1.36  |
| Cyclin M1 (predicted)                                                                                    | Cnmm1_predicted      | 0.25±0.14  |
| cyclin M2                                                                                                | Cnmm2                | 0.71±0.13  |
| cyclin M3 (predicted)                                                                                    | Cnmm3_predicted      | 5.14±0.25  |
| cyclin T2 (predicted)                                                                                    | Ccnt2_predicted      | 0.49±0.22  |
| cyclin Y                                                                                                 | Ccny                 | 4.14±0.05  |
| cyclin Y-like 1                                                                                          | Ccnyl1               | 0.41±0.26  |
| cyclin-dependent kinase (CDC2-like) 10                                                                   | Cdk10                | 0.81±0.06  |
| cyclin-dependent kinase 2B-inhibitor-related protein                                                     | P15rs                | 0.43±0.2   |
| cyclin-dependent kinase 2-interacting protein                                                            | Cinp                 | 1.29±0.2   |
| cyclin-dependent kinase 4                                                                                | Cdk4                 | 3.57±0.21  |
| cyclin-dependent kinase 5                                                                                | Cdk5                 | 1.18±0.23  |
| cyclin-dependent kinase 7 (homolog of Xenopus MO15 cdk-activating kinase)                                | Cdk7                 | 1.67±0.15  |
| cyclin-dependent kinase 9 (CDC2-related kinase)                                                          | Cdk9                 | 3.39±0.25  |
| cyclin-dependent kinase inhibitor 1A                                                                     | Cdkn1a               | 2.65±2     |
| cyclin-dependent kinase inhibitor 1B                                                                     | Cdkn1b               | 4.78±0.85  |
| cyclin-dependent kinase inhibitor 2C (p18, inhibits CDK4)                                                | Cdkn2c               | 1.57±0.1   |
| cyclin-dependent kinase inhibitor 3 (predicted)                                                          | Cdkn3_predicted      | 1.45±0.39  |
| cyldromatosis (turban tumor syndrome)                                                                    | Cyld                 | 1.52±0.55  |
| cystathionase (cystathionine gamma-lyase)                                                                | Cth                  | 2.59±1.22  |
| cystathionine beta synthase                                                                              | Cbs                  | 5.52±0.17  |
| cystatin B                                                                                               | Cstb                 | 20.39±1.49 |
| cystatin C                                                                                               | Cst3                 | 16.38±0.58 |
| cysteine and glycine-rich protein 1                                                                      | Csrp1                | 2.63±2.06  |
| cysteine and glycine-rich protein 2                                                                      | Csrp2                | 3.07±0.25  |
| cysteine and glycine-rich protein 2 binding protein (predicted)                                          | Csrp2bp_predicted    | 3.43±0.12  |
| cysteine and histidine rich 1                                                                            | Cyhr1                | 1.26±0.25  |
| cysteine and histidine-rich domain (CHORD)-containing, zinc-binding protein 1 (predicted)                | Chordc1_predicted    | 3.2±0.67   |
| cysteine conjugate-beta lyase 1                                                                          | Ccbl1                | 2.41±0.44  |
| cysteine dioxygenase 1, cytosolic                                                                        | Cdo1                 | 3.92±3.13  |
| cysteine rich transmembrane BMP regulator 1 (chordin like)                                               | Crim1                | 1.22±0.6   |
| cysteine sulfinic acid decarboxylase                                                                     | Csad                 | 2.49±0.15  |
| cysteine-rich hydrophobic domain 2 (predicted)                                                           | Chic2_predicted      | 0.24±0.03  |
| cysteine-rich PDZ-binding protein                                                                        | Cript                | 3.33±0.58  |
| cysteine-rich protein 2                                                                                  | Crip2                | 14.63±0.22 |
| cysteine-rich secretory protein LCCL domain containing 2                                                 | Crispld2             | 1.09±0.06  |
| cysteine-rich with EGF-like domains 2                                                                    | Crel2                | 0.35±0.16  |
| cysteine-serine-rich nuclear protein 2                                                                   | Csnrp2               | 0.78±0.02  |
| cysteinyl-tRNA synthetase (predicted)                                                                    | Cars_predicted       | 0.35±0.02  |
| cytidine 5'-triphosphate synthase (predicted)                                                            | Ctps_predicted       | 0.21±0.3   |
| cytidine 5'-triphosphate synthase 2                                                                      | Ctps2                | 1.92±0.32  |
| cytidine and dCMP deaminase domain containing 1                                                          | Cdad1                | 2.61±0.01  |
| cytidine monophosphate (UMP-CMP) kinase 1, cytosolic                                                     | Cmpk1                | 30.43±5.14 |
| cytidine monophospho-N-acetylneuraminic acid hydroxylase                                                 | Cmah                 | 1.06±0.15  |
| cytidine monophospho-N-acetylneuraminic acid synthetase                                                  | Cmas                 | 3.19±0.05  |
| Cytidine triphosphate synthase II                                                                        | Ctps2                | 1.72±0.42  |
| cytochrome b /// cytochrome c oxidase subunit 3                                                          | COX3 /// CYTB        | 81.6±8.51  |
| cytochrome b, ascorbate dependent 3                                                                      | Cybasc3              | 1.27±0.01  |
| cytochrome b-5                                                                                           | Cyb5                 | 6.73±1.04  |
| cytochrome b5 reductase 3                                                                                | Cyb5r3               | 1.27±0.69  |
| cytochrome b5 reductase 4                                                                                | Cyb5r4               | 3.62±0.12  |
| cytochrome b5 type B                                                                                     | Cyb5b                | 9.62±1.58  |
| cytochrome b-561 (predicted)                                                                             | Cyb561_predicted     | 4.83±0.38  |
| cytochrome b-561 domain containing 1 (predicted)                                                         | Cyb561d1_predicted   | 0.31±0.09  |
| cytochrome b-561 domain containing 2                                                                     | Cyb561d2             | 1.93±0.68  |
| cytochrome c oxidase subunit IV isoform 1                                                                | Cox4i1               | 50.09±3.79 |
| cytochrome c oxidase subunit Vb                                                                          | Cox5b                | 48.3±2.59  |
| cytochrome c oxidase subunit VIIa polypeptide 2 like (predicted)                                         | Cox7a2l_predicted    | 9.2±0.76   |
| cytochrome c oxidase subunit VIIb                                                                        | Cox7b                | 56.87±1.44 |

|                                                                                                         |                   |            |
|---------------------------------------------------------------------------------------------------------|-------------------|------------|
| cytochrome c oxidase, subunit Va                                                                        | Cox5a             | 47.57±3.34 |
| cytochrome c oxidase, subunit VIa, polypeptide 1                                                        | Cox6a1            | 46.55±3.19 |
| cytochrome c oxidase, subunit VIb polypeptide 1                                                         | Cox6b1            | 43.78±4.79 |
| cytochrome c oxidase, subunit VIc                                                                       | Cox6c             | 51.63±2.68 |
| cytochrome c oxidase, subunit VIIa 2                                                                    | Cox7a2            | 51.17±1.55 |
| cytochrome c oxidase, subunit VIIa                                                                      | Cox8a             | 58.35±0.33 |
| cytochrome c oxidase, subunit XVII assembly protein homolog (yeast)                                     | Cox17             | 7.25±2.34  |
| cytochrome c, somatic                                                                                   | Cycs              | 39.56±0.12 |
| cytochrome c-1 (predicted)                                                                              | Cyc1_predicted    | 36.6±1.26  |
| cytochrome P450 4F6                                                                                     | Cyp4f6            | 2.17±0.05  |
| cytochrome P450, family 2, subfamily s, polypeptide 1                                                   | Cyp2s1            | 2.4±0.62   |
| cytochrome P450, family 2, subfamily u, polypeptide 1                                                   | Cyp2u1            | 1.11±0.05  |
| cytochrome P450, family 20, subfamily A, polypeptide 1                                                  | Cyp20a1           | 3.05±0.58  |
| cytochrome P450, family 27, subfamily a, polypeptide 1                                                  | Cyp27a1           | 2.05±0.2   |
| cytochrome P450, family 4, subfamily f, polypeptide 17 (predicted)                                      | Cyp4f17_predicted | 0.31±0.06  |
| cytochrome P450, family 4, subfamily v, polypeptide 3                                                   | Cyp4v3            | 6.14±2.86  |
| cytochrome P450, subfamily 51                                                                           | Cyp51             | 5.1±1.36   |
| cytokine induced apoptosis inhibitor 1                                                                  | Ciapin1           | 5.65±0.52  |
| cytokine induced protein 29 kDa                                                                         | Cip29             | 4.37±0.93  |
| cytokine inducible SH2-containing protein                                                               | Cish              | 0.94±0.4   |
| cytoplasmic FMR1 interacting protein 1 (predicted)                                                      | Cyfi1_predicted   | 6.12±1.77  |
| cytoplasmic FMR1 interacting protein 2 (predicted)                                                      | Cyfi2_predicted   | 18.25±2.72 |
| cytoplasmic linker associated protein 1                                                                 | Clasp1            | 2.75±0.38  |
| cytoplasmic polyadenylation element binding protein 2 (predicted)                                       | Cpeb2_predicted   | 4.76±1.39  |
| cytoplasmic polyadenylation element binding protein 4 (predicted)                                       | Cpeb4_predicted   | 3.2±1.33   |
| cytoskeleton associated protein 2 (predicted)                                                           | Ckap2_predicted   | 0.32±0.18  |
| cytoskeleton associated protein 5                                                                       | Ckap5             | 1.58±0.73  |
| cytoskeleton-associated protein 4 (predicted)                                                           | Ckap4_predicted   | 0.38±0.16  |
| cytosolic iron-sulfur protein assembly 1 homolog (S. cerevisiae)                                        | Ciao1             | 1.81±0.39  |
| cytotoxic granule-associated RNA binding protein 1                                                      | Tia1              | 0.32±0.09  |
| cytotoxic T lymphocyte-associated protein 2 alpha                                                       | Ctla2a            | 1.46±0.58  |
| D site albumin promoter binding protein                                                                 | Dbp               | 0.79±0.39  |
| D-2-hydroxyglutarate dehydrogenase                                                                      | D2hgdh            | 0.83±0.06  |
| D4, zinc and double PHD fingers family 2 (predicted)                                                    | Dpf2_predicted    | 1.96±0.09  |
| damage-specific DNA binding protein 1                                                                   | Ddb1              | 4.99±0.23  |
| dapper homolog 2, antagonist of beta-catenin (xenopus) (predicted)                                      | Dact2_predicted   | 0.73±0.1   |
| DAZ associated protein 1                                                                                | Dazap1            | 2.08±0.53  |
| DAZ associated protein 2                                                                                | Dazap2            | 11.01±1.68 |
| DAZ interacting protein 1-like                                                                          | Dzip1l            | 1.98±0.26  |
| DC2 protein                                                                                             | Dc2               | 5.39±0.6   |
| dCMP deaminase                                                                                          | Dctd              | 0.43±0.1   |
| DCN1, defective in cullin neddylation 1, domain containing 1 (S. cerevisiae) (predicted)                | Dcun1d1_predicted | 1.36±0.42  |
| DCN1, defective in cullin neddylation 1, domain containing 4 (S. cerevisiae) (predicted)                | Dcun1d4_predicted | 3.02±0.78  |
| DCN1, defective in cullin neddylation 1, domain containing 5 (S. cerevisiae)                            | Dcun1d5           | 0.72±0.85  |
| DCP1 decapping enzyme homolog A (S. cerevisiae)                                                         | Dcp1a             | 0.68±0.35  |
| DCP1 decapping enzyme homolog b (S. cerevisiae)                                                         | Dcp1b             | 0.87±0.01  |
| DDHD domain containing 1                                                                                | Dhd1              | 0.65±0.5   |
| D-dopachrome tautomerase                                                                                | Ddt               | 15.24±0.56 |
| DEAD (Asp-Glu-Ala-Asp) box polypeptide 1                                                                | Ddx1              | 5.39±0.9   |
| DEAD (Asp-Glu-Ala-Asp) box polypeptide 10 (predicted)                                                   | Ddx10_predicted   | 0.97±0.17  |
| DEAD (Asp-Glu-Ala-Asp) box polypeptide 17                                                               | Ddx17             | 2.25±0.74  |
| DEAD (Asp-Glu-Ala-Asp) box polypeptide 18                                                               | Ddx18             | 0.79±0.07  |
| DEAD (Asp-Glu-Ala-Asp) box polypeptide 19                                                               | Ddx19             | 2.25±0.1   |
| DEAD (Asp-Glu-Ala-Asp) box polypeptide 20                                                               | Ddx20             | 0.55±0.1   |
| DEAD (Asp-Glu-Ala-Asp) box polypeptide 21                                                               | Ddx21             | 0.46±0.07  |
| DEAD (Asp-Glu-Ala-Asp) box polypeptide 23 (predicted)                                                   | Ddx23_predicted   | 2.54±0.18  |
| DEAD (Asp-Glu-Ala-Asp) box polypeptide 24                                                               | Ddx24             | 2.63±0.11  |
| DEAD (Asp-Glu-Ala-Asp) box polypeptide 27                                                               | Ddx27             | 0.89±0.19  |
| DEAD (Asp-Glu-Ala-Asp) box polypeptide 28 (predicted)                                                   | Ddx28_predicted   | 0.29±0.03  |
| DEAD (Asp-Glu-Ala-Asp) box polypeptide 39                                                               | Ddx39             | 0.94±0.16  |
| DEAD (Asp-Glu-Ala-Asp) box polypeptide 41 (predicted)                                                   | Ddx41_predicted   | 1.96±0.13  |
| DEAD (Asp-Glu-Ala-Asp) box polypeptide 42 (predicted)                                                   | Ddx42_predicted   | 2.65±0.03  |
| DEAD (Asp-Glu-Ala-Asp) box polypeptide 46                                                               | Ddx46             | 2.12±0.05  |
| DEAD (Asp-Glu-Ala-Asp) box polypeptide 47                                                               | Ddx47             | 2.23±0.05  |
| DEAD (Asp-Glu-Ala-Asp) box polypeptide 49 (predicted)                                                   | Ddx49_predicted   | 0.84±0.06  |
| DEAD (Asp-Glu-Ala-Asp) box polypeptide 5                                                                | Ddx5              | 17.18±2.28 |
| DEAD (Asp-Glu-Ala-Asp) box polypeptide 50                                                               | Ddx50             | 1.3±0.67   |
| DEAD (Asp-Glu-Ala-Asp) box polypeptide 51 (predicted)                                                   | Ddx51_predicted   | 1.47±0.26  |
| DEAD (Asp-Glu-Ala-Asp) box polypeptide 52                                                               | Ddx52             | 0.37±0.12  |
| DEAD (Asp-Glu-Ala-Asp) box polypeptide 54                                                               | Ddx54             | 0.87±0.05  |
| DEAD (Asp-Glu-Ala-Asp) box polypeptide 58 (predicted)                                                   | Ddx58_predicted   | 1.31±0.85  |
| DEAD (Asp-Glu-Ala-Asp) box polypeptide 59                                                               | Ddx59             | 0.61±0.01  |
| dead end homolog 1 (zebrafish)                                                                          | Dnd1              | 0.62±0.17  |
| DEAD/H (Asp-Glu-Ala-Asp/His) box polypeptide 11 (CHL1-like helicase homolog, S. cerevisiae) (predicted) | Ddx11_predicted   | 0.38±0.03  |
| DEAD/H (Asp-Glu-Ala-Asp/His) box polypeptide 3, X-linked                                                | Ddx3x             | 13.71±0.58 |
| DEAD/H (Asp-Glu-Ala-Asp/His) box polypeptide 31 (predicted)                                             | Ddx31_predicted   | 0.91±0.06  |
| DEAH (Asp-Glu-Ala-Asp/His) box polypeptide 57                                                           | Dhx57             | 1.12±0.04  |
| DEAH (Asp-Glu-Ala-His) box polypeptide 15 (predicted)                                                   | Dhx15_predicted   | 6.47±1.09  |
| DEAH (Asp-Glu-Ala-His) box polypeptide 30                                                               | Dhx30             | 1.6±0.35   |
| DEAH (Asp-Glu-Ala-His) box polypeptide 35 (predicted)                                                   | Dhx35_predicted   | 0.63±0.18  |
| DEAH (Asp-Glu-Ala-His) box polypeptide 36 (predicted)                                                   | Dhx36_predicted   | 2.28±0.37  |
| DEAH (Asp-Glu-Ala-His) box polypeptide 37 (predicted)                                                   | Dhx37_predicted   | 0.44±0.03  |
| DEAH (Asp-Glu-Ala-His) box polypeptide 38 (predicted)                                                   | Dhx38_predicted   | 0.44±0.05  |
| DEAH (Asp-Glu-Ala-His) box polypeptide 40                                                               | Dhx40             | 1.43±0.11  |
| DEAH (Asp-Glu-Ala-His) box polypeptide 8                                                                | Dhx8              | 0.6±0.05   |
| DEAH (Asp-Glu-Ala-His) box polypeptide 9 (predicted)                                                    | Dhx9_predicted    | 1.87±0.91  |
| death associated protein 3                                                                              | Dap3              | 2.9±0.44   |



|                                                                                       |                    |            |
|---------------------------------------------------------------------------------------|--------------------|------------|
| death associated protein kinase 1 (predicted)                                         | Dapk1_predicted    | 4.14±1.27  |
| death associated protein-like 1                                                       | Dapl1              | 5.05±0.52  |
| Death effector domain-containing                                                      | Dedd               | 4.32±0.04  |
| death inducer-oblierator 1                                                            | Dido1              | 0.58±0.12  |
| death-associated protein                                                              | Dap                | 2.19±0.34  |
| death-associated protein kinase 3                                                     | Dapk3              | 1.6±0.55   |
| debranching enzyme homolog 1 (S. cerevisiae)                                          | Dbr1               | 0.4±0.05   |
| decapping enzyme, scavenger                                                           | Dcps               | 1.16±0.2   |
| dedicator of cytokinesis 11                                                           | Dock11             | 1.85±0.52  |
| dedicator of cytokinesis 7                                                            | Dock7              | 1.12±0.53  |
| dedicator of cytokinesis 8                                                            | Dock8              | 2.38±0.78  |
| dedicator of cytokinesis 9                                                            | Dock9              | 1.57±2.35  |
| de-etiolated homolog 1 (Arabidopsis)                                                  | Det1               | 0.5±0.35   |
| defective in sister chromatid cohesion 1 homolog (S. cerevisiae)                      | Dsc1               | 0.37±0.26  |
| defender against cell death 1                                                         | Dad1               | 14.41±0.79 |
| deformed epidermal autoregulatory factor 1 (Drosophila)                               | Deaf1              | 1.08±0.21  |
| degenerative spermatocyte homolog 1 (Drosophila)                                      | Degs1              | 12.17±0.42 |
| degenerative spermatocyte homolog 2 (Drosophila), lipid desaturase                    | Degs2              | 0.74±2.2   |
| dehydrodolichyl diphosphate synthase                                                  | Dhd1               | 0.6±0.1    |
| dehydrogenase E1 and transketolase domain containing 1                                | Dhtkd1             | 2.48±0.54  |
| dehydrogenase/reductase (SDR family) member 1                                         | Dhrs1              | 2.93±0.15  |
| dehydrogenase/reductase (SDR family) member 3                                         | Dhrs3              | 4.96±1.36  |
| dehydrogenase/reductase (SDR family) member 4                                         | Dhrs4              | 6.05±0.54  |
| dehydrogenase/reductase (SDR family) member 7B                                        | Dhrs7b             | 2.3±0.08   |
| dehydrogenase/reductase (SDR family) X chromosome                                     | Dhrsx              | 2.29±0.11  |
| DEK oncogene (DNA binding)                                                            | Dek                | 9.11±1.59  |
| deltex 2 homolog (Drosophila)                                                         | Dtx2               | 0.37±0.17  |
| deltex 3 homolog (Drosophila)                                                         | Dtx3               | 2.78±0.49  |
| deltex 3-like (Drosophila)                                                            | Dtx3l              | 0.45±0.3   |
| demethyl-Q 7                                                                          | Coq7               | 6.24±0.55  |
| DENN/MADD domain containing 1A                                                        | Dennd1a            | 1.33±0.03  |
| DENN/MADD domain containing 2D (predicted)                                            | Dennd2d_predicted  | 2.14±1.07  |
| DENN/MADD domain containing 3                                                         | Dennd3             | 0.92±0.52  |
| DENN/MADD domain containing 4B                                                        | Dennd4b            | 0.54±0.1   |
| deoxyguanosine kinase (predicted)                                                     | Dguok_predicted    | 1.59±0.12  |
| deoxyhypusine hydroxylase/monooxygenase                                               | Dohh               | 1.41±0.19  |
| deoxyhypusine synthase                                                                | Dhps               | 1.79±0.73  |
| deoxynucleotidyltransferase, terminal, interacting protein 1                          | Dnttip1            | 3.05±0.04  |
| deoxynucleotidyltransferase, terminal, interacting protein 2 (predicted)              | Dnttip2_predicted  | 0.89±0.64  |
| deoxyribonuclease I                                                                   | Dnase1             | 41.07±6.97 |
| deoxythymidylate kinase (predicted)                                                   | Dtymk_predicted    | 5.08±0.59  |
| deoxyuridine triphosphatase                                                           | Dut                | 4.7±0.38   |
| DEP domain containing 5 (predicted)                                                   | Depdc5_predicted   | 0.47±0.13  |
| dephospho-CoA kinase domain containing                                                | Dcakd              | 7.02±0.94  |
| Der1-like domain family, member 1                                                     | Der1               | 4.33±0.12  |
| Dermal papilla derived protein 6                                                      | DERP6              | 0.27±0.06  |
| desmoplakin                                                                           | Dsp                | 12.29±0.55 |
| destrin                                                                               | Dstn               | 13.29±1.96 |
| DET1 and DDB1 associated 1                                                            | Dda1               | 1.25±0.18  |
| development and differentiation enhancing (predicted)                                 | Ddef1_predicted    | 0.73±0.31  |
| development and differentiation enhancing factor 2 (predicted)                        | Ddef2_predicted    | 1.82±0.42  |
| developmentally regulated GTP binding protein 1                                       | Drg1               | 1.93±0.05  |
| developmentally regulated GTP binding protein 2                                       | Drg2               | 1.78±0.64  |
| developmentally regulated protein TPO1                                                | Tpo1               | 1.62±0.1   |
| dexamethasone-induced transcript                                                      | Dexi               | 2.35±0.26  |
| diablo homolog (Drosophila)                                                           | Diablo             | 4.99±0.88  |
| diacylglycerol kinase zeta                                                            | Dgkz               | 3.23±0.98  |
| diacylglycerol lipase, beta                                                           | Daglb              | 0.43±0.13  |
| diacylglycerol O-acyltransferase 1                                                    | Dgat1              | 2.49±0.31  |
| diacylglycerol O-acyltransferase 2                                                    | Dgat2              | 5.26±1.6   |
| Diaphanous homolog 1 (Drosophila) (predicted)                                         | Diap1_predicted    | 1.59±0.37  |
| diazepam binding inhibitor                                                            | Dbi                | 41.05±5.91 |
| dicarbonyl L-xylulose reductase                                                       | Dcxr               | 4.88±0.33  |
| Dicer1, Dcr-1 homolog (Drosophila)                                                    | Dicer1             | 0.32±0.22  |
| differentially expressed in FDCP 8                                                    | Def8               | 1.44±0.33  |
| DiGeorge syndrome critical region gene 14                                             | Dgcr14             | 0.38±0.1   |
| DiGeorge syndrome critical region gene 2                                              | Dgcr2              | 4.13±0.39  |
| DiGeorge syndrome critical region gene 6 (predicted)                                  | Dgcr6_predicted    | 2.34±0.01  |
| DiGeorge syndrome critical region gene 8 (predicted)                                  | Dgcr8_predicted    | 1.58±0.26  |
| dihydrofolate reductase                                                               | Dhfr               | 0.78±0.13  |
| dihydrolipoamide branched chain transacylase E2                                       | Dbt                | 7.1±0.92   |
| dihydrolipoamide dehydrogenase                                                        | Dld                | 15.18±2.63 |
| dihydrolipoamide S-acetyltransferase (E2 component of pyruvate dehydrogenase complex) | Dlat               | 4.32±1.66  |
| dihydrolipoamide S-succinyltransferase (E2 component of 2-oxo-glutarate complex)      | Dlst               | 12.66±2.46 |
| dihydropyrimidinase-like 2                                                            | Dpysl2             | 2.97±1.41  |
| dihydrouridine synthase 2-like, SMM1 homolog (S. cerevisiae)                          | Dus2l              | 0.59±0.05  |
| dihydrouridine synthase 3-like (S. cerevisiae)                                        | Dus3l              | 0.85±0.03  |
| dihydroxyacetone kinase 2 homolog (yeast)                                             | Dak                | 0.34±0.72  |
| DIM1 dimethyladenosine transferase 1-like (S. cerevisiae)                             | Dimt1              | 0.46±0.29  |
| dimethylarginine dimethylaminohydrolase 2                                             | Ddah2              | 2.34±0.09  |
| dipeptidyl peptidase 9                                                                | Dpp9               | 0.83±0.32  |
| dipeptidylpeptidase 3                                                                 | Dpp3 /// LOC678760 | 2.09±0.62  |
| dipeptidylpeptidase 7                                                                 | Dpp7               | 10.61±1.31 |
| dipeptidylpeptidase 8 (predicted)                                                     | Dpp8_predicted     | 2.86±0.19  |
| DIS3 mitotic control homolog (S. cerevisiae)-like                                     | Dis3l              | 3.17±0.59  |
| DIS3 mitotic control homolog (S. cerevisiae)-like 2                                   | Dis3l2             | 1.57±0.87  |
| disabled homolog 2 (Drosophila) interacting protein                                   | Dab2ip             | 0.35±0.21  |

|                                                                                                               |                       |            |
|---------------------------------------------------------------------------------------------------------------|-----------------------|------------|
| disabled homolog 2, mitogen-responsive phosphoprotein (Drosophila)                                            | Dab2                  | 1.59±1.64  |
| Discs, large homolog 1 (Drosophila)                                                                           | Dlgh1                 | 2.82±0.01  |
| discs, large homolog 3 (Drosophila)                                                                           | Dlg3                  | 0.25±0.1   |
| discs, large homolog 5 (Drosophila) (predicted)                                                               | Dlg5_predicted        | 2.07±0.22  |
| discs, large homolog-associated protein 4 (Drosophila)                                                        | Dlgap4                | 0.68±0.38  |
| dishevelled associated activator of morphogenesis 1 (predicted)                                               | Daam1_predicted       | 2.25±0.01  |
| dishevelled, dsh homolog 1 (Drosophila)                                                                       | Dvl1                  | 2.25±0.61  |
| disrupted in renal carcinoma 2                                                                                | Dirc2                 | 2.73±0.27  |
| distrobrein binding protein 1                                                                                 | Dtnbp1                | 3.15±0.01  |
| DIX domain containing 1                                                                                       | Dixdc1                | 1.29±0.4   |
| Dmx-like 1 (predicted)                                                                                        | Dmxl1_predicted       | 0.38±0.22  |
| DNA cross-link repair 1A, PSO2 homolog (S. cerevisiae) (predicted)                                            | Dclre1a_predicted     | 1.53±0.11  |
| DNA cross-link repair 1B, PSO2 homolog (S. cerevisiae)                                                        | Dclre1b               | 0.68±0.12  |
| DNA fragmentation factor, alpha subunit                                                                       | Dffa                  | 1.45±0.04  |
| DNA helicase HEL308                                                                                           | Hel308                | 0.43±0.11  |
| DNA methyltransferase (cytosine-5) 1                                                                          | Dnmt1                 | 0.76±0.13  |
| DNA methyltransferase 1-associated protein 1                                                                  | Dmap1                 | 1.09±0.47  |
| DNA methyltransferase 3A                                                                                      | Dnmt3a                | 0.73±0.16  |
| DNA primase, p49 subunit                                                                                      | Prim1                 | 3.35±0.07  |
| DNA primase, p58 subunit                                                                                      | Prim2                 | 0.3±0.02   |
| DNA topoisomerase 1, mitochondrial                                                                            | Top1mt                | 0.49±0.13  |
| DNA-damage inducible transcript 3                                                                             | Ddit3                 | 1.09±0.28  |
| DNA-damage-inducible transcript 4                                                                             | Ddit4                 | 3.14±0.19  |
| DNA-damage-inducible transcript 4-like                                                                        | Ddit4l                | 0.68±0.38  |
| DnaJ (Hsp40) homolog, subfamily A, member 1                                                                   | Dnaja1                | 9.34±5.45  |
| DnaJ (Hsp40) homolog, subfamily A, member 2                                                                   | Dnaja2                | 7.74±0.65  |
| DnaJ (Hsp40) homolog, subfamily A, member 3                                                                   | Dnaja3                | 2.22±0.08  |
| DnaJ (Hsp40) homolog, subfamily A, member 4                                                                   | Dnaja4                | 0.35±0.15  |
| DnaJ (Hsp40) homolog, subfamily B, member 1 (predicted)                                                       | Dnajb1_predicted      | 30.78±0.74 |
| DnaJ (Hsp40) homolog, subfamily B, member 11                                                                  | Dnajb11               | 2.62±0.47  |
| DnaJ (Hsp40) homolog, subfamily B, member 12                                                                  | Dnajb12               | 0.62±0.06  |
| DnaJ (Hsp40) homolog, subfamily B, member 6                                                                   | Dnajb6                | 0.3±0      |
| DnaJ (Hsp40) homolog, subfamily B, member 9                                                                   | Dnajb9                | 1.95±1.09  |
| DnaJ (Hsp40) homolog, subfamily C, member 10                                                                  | Dnajc10               | 4.61±0.06  |
| DnaJ (Hsp40) homolog, subfamily C, member 11 (predicted)                                                      | Dnajc11_predicted     | 0.28±0.23  |
| DnaJ (Hsp40) homolog, subfamily C, member 13 (predicted)                                                      | Dnajc13_predicted     | 2.67±0.28  |
| DnaJ (Hsp40) homolog, subfamily C, member 14                                                                  | Dnajc14               | 0.86±0.04  |
| DnaJ (Hsp40) homolog, subfamily C, member 15 (predicted)                                                      | Dnajc15_predicted     | 12.33±2.87 |
| DnaJ (Hsp40) homolog, subfamily C, member 17 (predicted)                                                      | Dnajc17_predicted     | 0.43±0.1   |
| DnaJ (Hsp40) homolog, subfamily C, member 18                                                                  | Dnajc18               | 0.61±0.17  |
| DnaJ (Hsp40) homolog, subfamily C, member 2                                                                   | Dnajc2                | 1.09±0.15  |
| DnaJ (Hsp40) homolog, subfamily C, member 21                                                                  | Dnajc21               | 0.71±0.07  |
| DnaJ (Hsp40) homolog, subfamily C, member 3                                                                   | Dnajc3                | 3.27±0.13  |
| DnaJ (Hsp40) homolog, subfamily C, member 4                                                                   | Dnajc4                | 1.34±0.23  |
| DnaJ (Hsp40) homolog, subfamily C, member 5                                                                   | Dnajc5                | 0.43±0.11  |
| DnaJ (Hsp40) homolog, subfamily C, member 7                                                                   | Dnajc7                | 4.06±0.17  |
| DnaJ (Hsp40) homolog, subfamily C, member 8                                                                   | Dnajc8                | 2.65±0.2   |
| DnaJ (Hsp40) homolog, subfamily C, member 9 (predicted)                                                       | Dnajc9_predicted      | 3.2±0.02   |
| DnaJ homolog subfamily C member 12                                                                            | Dnajc12               | 2.58±0.47  |
| dnaj-like protein                                                                                             | LOC56764              | 0.31±0.01  |
| docking protein 4 (predicted)                                                                                 | Dok4_predicted        | 0.86±0.05  |
| dodecenoyl-coenzyme A delta isomerase                                                                         | Dci                   | 7.25±0.02  |
| dolichol kinase                                                                                               | Dolk                  | 3.72±1.46  |
| dolichol-phosphate (beta-D) mannosyltransferase 1 (predicted)                                                 | Dpm1_predicted        | 6.57±0.14  |
| dolichol-phosphate (beta-D) mannosyltransferase 2                                                             | Dpm2                  | 1.85±0.31  |
| dolichyl-di-phosphooligosaccharide-protein glycotransferase (predicted)                                       | Ddost_predicted       | 7.86±0.05  |
| dolichyl-phosphate (UDP-N-acetylglucosamine) N-acetylglucosaminophosphotransferase 1 (GlcNAc-1-P transferase) | Dpagt1                | 1.71±0.23  |
| dopey family member 2 (predicted)                                                                             | Dopey2_predicted      | 0.68±0.25  |
| DOT1-like, histone H3 methyltransferase (S. cerevisiae) (predicted)                                           | Dot1l_predicted       | 0.96±0.03  |
| doublecortin domain containing 2                                                                              | Dcdc2                 | 1.2±0.68   |
| doublecortin-like kinase 1                                                                                    | Dclk1                 | 0.21±0.01  |
| Down syndrome critical region gene 3 (predicted)                                                              | Dscr3_predicted       | 1.67±0.05  |
| Down syndrome critical region homolog 2 (human) (predicted)                                                   | Dscr2_predicted       | 7.56±1.37  |
| down-regulator of transcription 1                                                                             | Dr1                   | 1.89±0.09  |
| downstream of Stk11 (predicted)                                                                               | Dos_predicted         | 0.32±0.75  |
| DPH1 homolog (S. cerevisiae) /// candidate tumor suppressor in ovarian cancer 2                               | Dph1 /// Ovca2        | 2.87±0.46  |
| DPH2 homolog (S. cerevisiae)                                                                                  | Dph2                  | 0.5±0.18   |
| DPH3, KTI11 homolog (S. cerevisiae)                                                                           | Dph3                  | 5.64±0.64  |
| DPH4 homolog (JJJ3, S. cerevisiae)                                                                            | Dph4                  | 0.53±0.33  |
| DPH5 homolog (S. cerevisiae)                                                                                  | Dph5                  | 0.24±0.09  |
| Dpy-19-like 1 (C. elegans) (predicted)                                                                        | Dpy19l1_predicted     | 1.5±0.16   |
| dpy-30 homolog (C. elegans)                                                                                   | Dpy30                 | 5.47±0.37  |
| Dr1 associated protein 1 (negative cofactor 2 alpha) (predicted)                                              | Drap1_predicted       | 2.92±0.6   |
| drebrin 1                                                                                                     | Dbn1                  | 1.85±0.09  |
| drebrin-like                                                                                                  | Dbnl                  | 2.45±0.2   |
| D-serine modulator-1                                                                                          | Dsm-1                 | 2.02±0.98  |
| DTW domain containing 1                                                                                       | Dtwd1                 | 0.37±0.01  |
| D-tyrosyl-tRNA deacylase 1 homolog (S. cerevisiae)                                                            | Dtd1                  | 5.24±0.42  |
| dual specificity phosphatase 1                                                                                | Dusp1                 | 3.37±5.46  |
| dual specificity phosphatase 11 (RNA/RNP complex 1-interacting)                                               | Dusp11                | 1.27±0.14  |
| dual specificity phosphatase 12                                                                               | Dusp12                | 0.2±0.08   |
| dual specificity phosphatase 14 (predicted)                                                                   | Dusp14_predicted / LO | 2.82±1.24  |
| dual specificity phosphatase 18                                                                               | Dusp18                | 0.42±0.07  |
| dual specificity phosphatase 19 (predicted)                                                                   | Dusp19_predicted      | 0.48±0.07  |
| dual specificity phosphatase 22 (predicted)                                                                   | Dusp22_predicted      | 0.35±0.19  |
| dual specificity phosphatase 3 (vaccinia virus phosphatase VH1-related)                                       | Dusp3                 | 1.26±0.69  |
| Dual specificity phosphatase 6                                                                                | Dusp6                 | 1.37±1.7   |

|                                                                                            |                  |            |
|--------------------------------------------------------------------------------------------|------------------|------------|
| dual specificity phosphatase 9                                                             | Dusp9            | 0.31±0.07  |
| dual-specificity tyrosine-(Y)-phosphorylation regulated kinase 1A                          | Dyrk1a           | 1.14±0.35  |
| dual-specificity tyrosine-(Y)-phosphorylation regulated kinase 2 (predicted)               | Dyrk2_predicted  | 1.15±0.21  |
| Dullard homolog (Xenopus laevis)                                                           | Dullard          | 0.6±0.29   |
| dymeclin (predicted)                                                                       | Dym_predicted    | 2.48±0.06  |
| dynactin 1                                                                                 | Dctn1            | 3.31±0.05  |
| dynactin 2                                                                                 | Dctn2            | 3.02±0.16  |
| dynactin 3 (predicted)                                                                     | Dctn3_predicted  | 4.98±0.21  |
| dynactin 4                                                                                 | Dctn4            | 0.52±0.02  |
| dynactin 5                                                                                 | Dctn5            | 2.74±0.5   |
| dynactin 6 (predicted)                                                                     | Dctn6_predicted  | 14.07±3.78 |
| dynamain 1                                                                                 | Dnm1             | 5.14±1.78  |
| dynamain 1-like                                                                            | Dnm1l            | 1.66±0.14  |
| dynamain binding protein                                                                   | Dnmbp            | 3.76±0.38  |
| dynein cytoplasmic 1 heavy chain 1                                                         | Dync1h1          | 7.53±0.72  |
| dynein cytoplasmic 1 intermediate chain 2                                                  | Dync1i2          | 5.75±0.76  |
| Dynein cytoplasmic 1 light intermediate chain 1                                            | Dync1li1         | 4.21±0.8   |
| dynein cytoplasmic 2 heavy chain 1                                                         | Dync2h1          | 0.6±0.02   |
| dynein cytoplasmic 2 light intermediate chain 1                                            | Dync2li1         | 1.97±0.04  |
| dynein light chain LC8-type 1                                                              | Dynll1           | 14.92±1.31 |
| dynein light chain LC8-type 2                                                              | Dynll2           | 12.96±1.49 |
| dynein light chain roadblock-type 1                                                        | Dynlr1           | 12.79±0.67 |
| dynein light chain Tctex-type 1                                                            | Dynlt1           | 1.69±0.22  |
| dynein light chain Tctex-type 3                                                            | Dynlt3           | 6.93±1.52  |
| dynein, axonemal, light chain 4                                                            | Dnalc4           | 1.57±0.11  |
| dynein, cytoplasmic 1 light intermediate chain 2                                           | Dync1li2         | 2.86±0.43  |
| dyskeratosis congenita 1, dyskerin                                                         | Dkc1             | 1.19±0.28  |
| dystonia 1                                                                                 | Dyt1             | 1.27±0.08  |
| dystonin (predicted)                                                                       | Dst_predicted    | 15.94±1.35 |
| dystrobrevin alpha (predicted)                                                             | Dtna_predicted   | 1.3±0.31   |
| dystrobrevin, beta                                                                         | Dtnb             | 2.49±0.25  |
| dystroglycan 1                                                                             | Daq1             | 6.9±2.25   |
| dystrophia myotonica-protein kinase (predicted)                                            | Dmpk_predicted   | 2.4±0.35   |
| E030032D13Rik gene                                                                         | E030032D13Rik    | 0.37±0.42  |
| E1A binding protein p300                                                                   | Ep300            | 4.37±0.52  |
| E1A binding protein p400                                                                   | Ep400            | 1.13±0.11  |
| E2F transcription factor 1                                                                 | E2f1             | 0.71±0.09  |
| E2F transcription factor 5                                                                 | E2f5             | 0.94±0.36  |
| E2F1-inducible gene                                                                        | LOC303566        | 0.24±0.11  |
| E2F-associated phosphoprotein                                                              | Eapp             | 3.96±0.36  |
| E74-like factor 1                                                                          | Elf1             | 0.58±0.06  |
| E74-like factor 2                                                                          | Elf2             | 2.73±0.35  |
| E74-like factor 3                                                                          | Elf3             | 4.25±0.37  |
| early endosome antigen 1 (predicted)                                                       | Eea1_predicted   | 1.12±0.14  |
| early growth response 1                                                                    | Egr1             | 17.64±7.54 |
| early growth response 2                                                                    | Egr2             | 1.68±1.18  |
| EBNA1 binding protein 2                                                                    | Ebna1bp2         | 2±0.37     |
| echinoderm microtubule associated protein like 2                                           | Eml2             | 1.2±0.07   |
| ecotropic viral integration site 1 (predicted)                                             | Evi1_predicted   | 2.9±0.3    |
| ECSIT homolog (Drosophila)                                                                 | Ecsit            | 3.32±1.16  |
| ect2 oncogene (predicted)                                                                  | Ect2_predicted   | 0.82±0.13  |
| ectonucleoside triphosphate diphosphohydrolase 2                                           | Entpd2           | 4.42±0.71  |
| ectonucleoside triphosphate diphosphohydrolase 4 (predicted)                               | Entpd4_predicted | 1.54±0.96  |
| ectonucleoside triphosphate diphosphohydrolase 6                                           | Entpd6           | 0.43±0.19  |
| ectonucleotide pyrophosphatase/phosphodiesterase 1                                         | Enpp1            | 1.83±0.52  |
| Ectonucleotide pyrophosphatase/phosphodiesterase 4 (predicted)                             | Enpp4_predicted  | 1.26±0.69  |
| EF hand domain containing 1                                                                | Efh1             | 26.12±4.49 |
| EF hand domain containing 2                                                                | Efh2             | 0.23±0.45  |
| EF hand domain family A1                                                                   | Efha1            | 2.71±0.28  |
| EF hand domain family, member A2                                                           | Efha2            | 1.13±0.18  |
| EF-hand calcium binding domain 2 (predicted)                                               | Efcab2_predicted | 0.59±0.27  |
| EF-hand calcium binding domain 7                                                           | Efcab7           | 0.27±0.16  |
| EFR3 homolog A (S. cerevisiae)                                                             | Efr3a            | 6.61±1.9   |
| EGF-containing fibulin-like extracellular matrix protein 2                                 | Efemp2           | 0.4±0.06   |
| EGF-like domain 8                                                                          | Egfl8            | 2.64±0.29  |
| EGL nine homolog 1 (C. elegans)                                                            | Egln1            | 3.11±0.48  |
| EGL nine homolog 2 (C. elegans)                                                            | Egln2            | 2.72±0     |
| EGL nine homolog 3 (C. elegans)                                                            | Egln3            | 1.69±0.18  |
| EH domain binding protein 1 (predicted)                                                    | Ehbp1_predicted  | 0.54±0.39  |
| EH-domain containing 1                                                                     | Ehd1             | 0.89±0.07  |
| EH-domain containing 2                                                                     | Ehd2             | 0.43±0.84  |
| EH-domain containing 4                                                                     | Ehd4             | 0.65±0.87  |
| elaC homolog 2 (E. coli)                                                                   | Elac2            | 0.88±0.01  |
| elastase 1, pancreatic                                                                     | Ela1             | 0.82±0.33  |
| ELAV (embryonic lethal, abnormal vision, Drosophila)-like 1 (Hu antigen R) (predicted)     | Elavl1_predicted | 5.21±0.9   |
| electron transferring flavoprotein, alpha polypeptide                                      | Etfa             | 14.81±3.93 |
| electron transferring flavoprotein, beta polypeptide                                       | Etfb             | 24.78±5.97 |
| electron-transferring-flavoprotein dehydrogenase                                           | Etfdh            | 4.79±0.25  |
| ELK4, member of ETS oncogene family (predicted)                                            | Elk4_predicted   | 0.83±0.37  |
| ELL associated factor 1 (predicted)                                                        | Eaf1_predicted   | 0.48±0.4   |
| ELMO domain containing 2                                                                   | Elmod2           | 0.52±0.2   |
| elongation factor 1 homolog (S. cerevisiae)                                                | Elof1            | 6.41±0.46  |
| elongation factor RNA polymerase II (predicted)                                            | Ell_predicted    | 1.02±0.31  |
| elongation factor RNA polymerase II 2                                                      | Ell2             | 0.86±0.04  |
| Elongation factor RNA polymerase II-like 3                                                 | Ell3             | 0.62±0.18  |
| elongation factor Tu GTP binding domain containing 2                                       | Eftud2           | 3.02±0.59  |
| elongation of very long chain fatty acids (FEN1/Elo2, SUR4/Elo3, yeast)-like 2 (predicted) | Elov12_predicted | 0.39±0.12  |

|                                                                                                                                  |                      |            |
|----------------------------------------------------------------------------------------------------------------------------------|----------------------|------------|
| elongation protein 2 homolog (S. cerevisiae)                                                                                     | Elp2                 | 2.65±0.02  |
| ELOVL family member 6, elongation of long chain fatty acids (yeast)                                                              | Elov16               | 4.96±1.04  |
| embigin                                                                                                                          | Emb                  | 13.23±2.16 |
| embryonic ectoderm development (predicted)                                                                                       | Eed_predicted        | 1.66±0.35  |
| emerin                                                                                                                           | Emd                  | 0.44±0.28  |
| empty spiracles homeobox 2                                                                                                       | Emx2                 | 2.2±1.38   |
| enabled homolog (Drosophila)                                                                                                     | Enah                 | 0.8±0.11   |
| Ena-vasodilator stimulated phosphoprotein                                                                                        | Evl                  | 1.88±0.38  |
| endonuclease G                                                                                                                   | Endog                | 1.57±0.1   |
| endonuclease G-like 1 (predicted)                                                                                                | Endog1_predicted     | 0.4±0.21   |
| endonuclease/exonuclease/phosphatase family domain containing 1                                                                  | Eepd1                | 1.01±0.06  |
| endoplasmic reticulum (ER) to nucleus signalling 1                                                                               | Ern1                 | 1.42±0.24  |
| endoplasmic reticulum chaperone SIL1 homolog (S. cerevisiae)                                                                     | Sil1                 | 1.88±0.17  |
| endoplasmic reticulum metalloproteinase 1                                                                                        | Ermp1                | 2.3±0.51   |
| endoplasmic reticulum protein 29                                                                                                 | Erp29                | 3.88±0.21  |
| endoplasmic reticulum-golgi intermediate compartment (ERGIC) 1                                                                   | Ergic1               | 2.24±0.32  |
| endosulfine alpha                                                                                                                | Ensa                 | 3.15±0.01  |
| endothelial cell adhesion molecule                                                                                               | Esam                 | 5.39±0.8   |
| endothelial differentiation, sphingolipid G-protein-coupled receptor, 5                                                          | Edg5                 | 0.5±0.32   |
| endothelial differentiation-related factor 1 (predicted)                                                                         | Edf1_predicted       | 15.03±2.05 |
| endothelin converting enzyme 1                                                                                                   | Ece1                 | 2.22±0.3   |
| engulfment and cell motility 2, ced-12 homolog (C. elegans)                                                                      | Elmo2                | 0.77±0.06  |
| engulfment and cell motility 3, ced-12 homolog (C. elegans)                                                                      | Elmo3                | 1.69±0.13  |
| enhancer of polycomb homolog 1 (Drosophila) (predicted)                                                                          | Epc1_predicted       | 2.11±0.19  |
| enhancer of polycomb homolog 2 (Drosophila) (predicted)                                                                          | Epc2_predicted       | 0.44±0.08  |
| enhancer of rudimentary homolog (Drosophila)                                                                                     | Erh                  | 5.11±0.43  |
| enhancer of zeste homolog 1 (Drosophila) (predicted)                                                                             | Ezh1_predicted       | 3.74±0.58  |
| enhancer of zeste homolog 2 (Drosophila)                                                                                         | Ezh2                 | 0.52±0.16  |
| enolase 1, alpha non-neuron                                                                                                      | Eno1                 | 37.43±2.13 |
| enolase-phosphatase 1                                                                                                            | Enoph1               | 1.65±0.13  |
| enoyl coenzyme A hydratase 1, peroxisomal                                                                                        | Ech1                 | 8.31±2.67  |
| enoyl Coenzyme A hydratase domain containing 1                                                                                   | Echdc1               | 5.97±1.08  |
| enoyl Coenzyme A hydratase domain containing 2 (predicted)                                                                       | Echdc2_predicted     | 0.38±0.65  |
| enoyl Coenzyme A hydratase, short chain, 1, mitochondrial                                                                        | Echs1                | 11.77±1.26 |
| enoyl-Coenzyme A, hydratase/3-hydroxyacyl Coenzyme A dehydrogenase                                                               | Ehhadh               | 0.96±0.1   |
| enthoproten                                                                                                                      | Enth                 | 17.01±1.9  |
| EP300 interacting inhibitor of differentiation 1                                                                                 | Eid1                 | 8.34±0.67  |
| Eph receptor A4                                                                                                                  | Epha4                | 0.3±0.06   |
| Eph receptor B2 (predicted)                                                                                                      | Ephb2_predicted      | 3.36±0.27  |
| Eph receptor B3 (predicted)                                                                                                      | Ephb3_predicted      | 1.01±0.07  |
| ephrin A1                                                                                                                        | Efna1                | 0.46±0.46  |
| ephrin A4 (predicted)                                                                                                            | Efna4_predicted      | 0.44±0.06  |
| ephrin B1                                                                                                                        | Efnb1                | 0.25±0.11  |
| epidermal growth factor                                                                                                          | Egf                  | 39.82±1.43 |
| epidermal growth factor receptor III peptidase D                                                                                 | Egfr /// Pepd        | 1.69±0.66  |
| epidermal growth factor receptor pathway substrate 15                                                                            | Eps15                | 0.89±0.42  |
| epidermal growth factor receptor pathway substrate 15-like 1                                                                     | Eps15l1              | 0.94±0.35  |
| epidermal growth factor receptor pathway substrate 8 (predicted)                                                                 | Eps8_predicted       | 0.66±0.19  |
| epidermal growth factor-containing fibulin-like extracellular matrix protein 1                                                   | Efemp1               | 3.89±0.72  |
| EPM2A (laforin) interacting protein 1 (predicted)                                                                                | Epm2aip1_predicted   | 8.22±0.89  |
| epoxide hydrolase 1, microsomal                                                                                                  | Ephx1                | 1.62±0.64  |
| epoxide hydrolase 2, cytoplasmic                                                                                                 | Ephx2                | 4.36±0.88  |
| EPS8-like 2 (predicted)                                                                                                          | Eps8l2_predicted     | 11.22±3.01 |
| epsilon-tubulin 1                                                                                                                | Tube1                | 0.2±0.1    |
| Epsin 1                                                                                                                          | Epn1                 | 1.03±0.13  |
| epsin 2                                                                                                                          | Epn2                 | 0.82±0.4   |
| epsin 3                                                                                                                          | Epn3                 | 1.91±0.37  |
| ER degradation enhancer, mannosidase alpha-like 1                                                                                | Edem1                | 3.29±0.58  |
| ER degradation enhancer, mannosidase alpha-like 2                                                                                | Edem2                | 0.98±0.3   |
| ER lipid raft associated 1                                                                                                       | Erlin1               | 1.47±0.29  |
| ER lipid raft associated 2                                                                                                       | Erlin2               | 7.59±0.61  |
| ERBB receptor feedback inhibitor 1                                                                                               | Errf1                | 6.27±7.36  |
| ERGIC and golgi 3 (predicted)                                                                                                    | Ergic3_predicted     | 2.58±0.05  |
| ERO1-like (S. cerevisiae)                                                                                                        | Ero1l                | 2.41±0.15  |
| erythrocyte membrane protein band 4.1                                                                                            | Epb4.1               | 2.53±0.17  |
| erythrocyte membrane protein band 4.1-like 2                                                                                     | Epb4.1l2             | 0.39±0.11  |
| erythrocyte protein band 4.1-like 1                                                                                              | Epb4.1l1             | 3.47±0.47  |
| erythrocyte protein band 4.1-like 4a (predicted)                                                                                 | Epb4.1l4a_predicted  | 1.95±0.21  |
| erythrocyte protein band 4.1-like 5                                                                                              | Epb4.1l5             | 2.37±0.23  |
| erythrocyte protein band 4.9 (predicted)                                                                                         | Epb4.9_predicted     | 10.51±1.93 |
| ESF1, nucleolar pre-rRNA processing protein, homolog (S. cerevisiae)                                                             | Esf1                 | 0.45±0.07  |
| establishment of cohesion 1 homolog 1 (S. cerevisiae)                                                                            | Esco1                | 3.94±0.07  |
| esterase D/formylglutathione hydrolase                                                                                           | Esd                  | 6.44±0.1   |
| estrogen receptor-binding fragment-associated gene 9                                                                             | Ebag9                | 1.88±0.6   |
| estrogen related receptor, alpha                                                                                                 | Esrra                | 4.22±1.81  |
| Ethanolamine kinase 1 (predicted)                                                                                                | Etnk1_predicted      | 22.78±5.07 |
| ethylmalonic encephalopathy 1 (predicted)                                                                                        | Ethe1_predicted      | 1.71±0.56  |
| etoposide induced 2.4 mRNA                                                                                                       | Ei24                 | 7.16±0.15  |
| Ets2 repressor factor (predicted)                                                                                                | Erf_predicted        | 2.08±0.65  |
| euchromatic histone methyltransferase 1 (predicted)                                                                              | Ehmt1_predicted      | 1.51±0.05  |
| eukaryotic elongation factor, selenocysteine-tRNA-specific                                                                       | Eefsec               | 0.5±0.04   |
| eukaryotic elongation factor-2 kinase                                                                                            | Eef2k                | 0.44±0.25  |
| eukaryotic translation elongation factor 1 alpha 1                                                                               | Eef1a1               | 31.52±2.2  |
| eukaryotic translation elongation factor 1 alpha 1 /// similar to eukaryotic translation elongation factor 1 alpha 1 (predicted) | Eef1a1 /// RGD156634 | 35.76±4.16 |
| eukaryotic translation elongation factor 1 beta 2 (predicted)                                                                    | Eef1b2_predicted     | 14.91±2.58 |
| eukaryotic translation elongation factor 1 delta (guanine nucleotide exchange protein)                                           | Eef1d                | 5.86±0.02  |
| eukaryotic translation elongation factor 1 epsilon 1 (predicted)                                                                 | Eef1e1_predicted     | 3.37±0.73  |

|                                                                                                                                  |                         |            |
|----------------------------------------------------------------------------------------------------------------------------------|-------------------------|------------|
| eukaryotic translation elongation factor 1 gamma                                                                                 | Eef1g                   | 20.16±0.38 |
| eukaryotic translation elongation factor 2                                                                                       | Eef2                    | 17.31±2.51 |
| eukaryotic translation initiation factor 1                                                                                       | Eif1                    | 16.97±4.4  |
| eukaryotic translation initiation factor 1A                                                                                      | Eif1a                   | 1.09±0.55  |
| eukaryotic translation initiation factor 1A domain containing                                                                    | Eif1ad                  | 1.9±0.57   |
| eukaryotic translation initiation factor 1A, Y-linked                                                                            | Eif1ay                  | 6.27±1.4   |
| eukaryotic translation initiation factor 1B (predicted)                                                                          | Eif1b_predicted         | 2.47±0.7   |
| eukaryotic translation initiation factor 2 alpha kinase 1                                                                        | Eif2ak1                 | 2.99±0.05  |
| eukaryotic translation initiation factor 2 alpha kinase 3                                                                        | Eif2ak3                 | 1.24±0.02  |
| eukaryotic translation initiation factor 2, subunit 1 alpha                                                                      | Eif2s1                  | 3.68±1.29  |
| eukaryotic translation initiation factor 2, subunit 1 alpha /// hypothetical gene supported by NM_019356                         | Eif2s1 /// LOC364604 // | 0.98±0.08  |
| eukaryotic translation initiation factor 2, subunit 2 (beta)                                                                     | Eif2s2                  | 5.55±0.55  |
| eukaryotic translation initiation factor 2, subunit 3, structural gene X-linked                                                  | Eif2s3x                 | 6.58±2.72  |
| eukaryotic translation initiation factor 2A                                                                                      | Eif2a                   | 1.21±0.14  |
| eukaryotic translation initiation factor 2-alpha kinase 2                                                                        | Eif2ak2                 | 0.73±0.76  |
| eukaryotic translation initiation factor 2B, subunit 1 alpha                                                                     | Eif2b1                  | 1.7±0.13   |
| eukaryotic translation initiation factor 2B, subunit 2 beta                                                                      | Eif2b2                  | 1.76±0.19  |
| eukaryotic translation initiation factor 2B, subunit 3                                                                           | Eif2b3                  | 0.55±0.02  |
| eukaryotic translation initiation factor 2B, subunit 4 delta                                                                     | Eif2b4                  | 3.83±1.41  |
| eukaryotic translation initiation factor 2B, subunit 5 epsilon                                                                   | Eif2b5                  | 1.57±0.06  |
| eukaryotic translation initiation factor 2C, 1 (predicted)                                                                       | Eif2c1_predicted        | 2.77±0.2   |
| eukaryotic translation initiation factor 2C, 2                                                                                   | Eif2c2                  | 0.41±0.21  |
| eukaryotic translation initiation factor 3, subunit 1 alpha (predicted)                                                          | Eif3s1_predicted        | 5.24±0.59  |
| eukaryotic translation initiation factor 3, subunit 10 (theta)                                                                   | Eif3s10                 | 5.53±0.1   |
| eukaryotic translation initiation factor 3, subunit 6 interacting protein                                                        | Eif3s6ip                | 11.16±0.64 |
| eukaryotic translation initiation factor 3, subunit 9 (eta)                                                                      | Eif3s9                  | 5.83±0.82  |
| eukaryotic translation initiation factor 3, subunit C                                                                            | Eif3c                   | 7.75±1.18  |
| eukaryotic translation initiation factor 3, subunit D                                                                            | Eif3d                   | 3.64±0.04  |
| eukaryotic translation initiation factor 3, subunit E                                                                            | Eif3e                   | 8.2±0.78   |
| eukaryotic translation initiation factor 3, subunit F                                                                            | Eif3f                   | 8.96±0.11  |
| eukaryotic translation initiation factor 3, subunit G                                                                            | Eif3g                   | 10±0.49    |
| eukaryotic translation initiation factor 3, subunit H                                                                            | Eif3h                   | 11.39±0.33 |
| eukaryotic translation initiation factor 3, subunit K                                                                            | Eif3k                   | 5.22±0.12  |
| eukaryotic translation initiation factor 4 gamma, 1                                                                              | Eif4g1                  | 4.48±1     |
| eukaryotic translation initiation factor 4 gamma, 1 /// similar to eukaryotic translation initiation factor 4, gamma 1 isoform A | Eif4g1 /// LOC683907    | 0.28±0.04  |
| eukaryotic translation initiation factor 4 gamma, 3 (predicted)                                                                  | Eif4g3_predicted        | 2.39±0.18  |
| eukaryotic translation initiation factor 4, gamma 2 (predicted)                                                                  | Eif4g2_predicted        | 20.93±1.74 |
| eukaryotic translation initiation factor 4A1                                                                                     | Eif4a1                  | 5.44±0.76  |
| eukaryotic translation initiation factor 4A2                                                                                     | Eif4a2                  | 26.87±3.76 |
| eukaryotic translation initiation factor 4B                                                                                      | Eif4b                   | 4.11±0.65  |
| eukaryotic translation initiation factor 4E                                                                                      | Eif4e                   | 7.56±1.41  |
| eukaryotic translation initiation factor 4E binding protein 1                                                                    | Eif4ebp1                | 1.19±0.14  |
| eukaryotic translation initiation factor 4E binding protein 2                                                                    | Eif4ebp2                | 4.15±0.67  |
| eukaryotic translation initiation factor 4E member 2 (predicted)                                                                 | Eif4e2_predicted        | 3.13±0.03  |
| eukaryotic translation initiation factor 4E member 3                                                                             | Eif4e3                  | 0.3±0.22   |
| eukaryotic translation initiation factor 4E nuclear import factor 1                                                              | Eif4enif1               | 1.33±0.2   |
| eukaryotic translation initiation factor 4H                                                                                      | Eif4h                   | 12.28±0.78 |
| eukaryotic translation initiation factor 5                                                                                       | Eif5                    | 2.47±1.2   |
| eukaryotic translation initiation factor 5A                                                                                      | Eif5a                   | 6.49±0.67  |
| eukaryotic translation initiation factor 5B                                                                                      | Eif5b                   | 1.7±0.34   |
| eukaryotic translation initiation factor 6                                                                                       | Eif6                    | 5.17±0.15  |
| Eukaryotic translation termination factor 1                                                                                      | Etf1                    | 3.7±0.19   |
| Ewing sarcoma breakpoint region 1                                                                                                | Ewsr1                   | 2.76±0.06  |
| Ewing's tumor-associated antigen 1                                                                                               | Etaa1                   | 0.78±0.1   |
| excision repair cross-complementing rodent repair deficiency, complementation group 1 (predicted)                                | Erccl1_predicted        | 2.27±0.49  |
| excision repair cross-complementing rodent repair deficiency, complementation group 3                                            | Erccl3                  | 1.01±0.29  |
| excision repair cross-complementing rodent repair deficiency, complementation group 4                                            | Erccl4                  | 0.63±0.3   |
| excision repair cross-complementing rodent repair deficiency, complementation group 5                                            | Erccl5                  | 0.6±0.08   |
| excision repair cross-complementing rodent repair deficiency, complementation group 6 (predicted)                                | Erccl6_predicted        | 0.53±0.11  |
| excision repair cross-complementing rodent repair deficiency, complementation group 8                                            | Erccl8                  | 0.32±0.14  |
| exocyst complex component 2                                                                                                      | Exoc2                   | 1.97±0.37  |
| exocyst complex component 3                                                                                                      | Exoc3                   | 3.21±0.51  |
| Exocyst complex component 4                                                                                                      | Exoc4                   | 0.85±0.02  |
| exocyst complex component 5                                                                                                      | Exoc5                   | 0.55±0.41  |
| exocyst complex component 6                                                                                                      | Exoc6                   | 0.75±0.1   |
| exocyst complex component 7                                                                                                      | Exoc7                   | 1.01±0.38  |
| exonuclease 3"-5" domain-like 2 (predicted)                                                                                      | Exdl2_predicted         | 1.43±0.14  |
| exosome component 3 (predicted)                                                                                                  | Exosc3_predicted        | 1.71±0.32  |
| Exosome component 4 (predicted)                                                                                                  | Exosc4_predicted        | 1.14±0.36  |
| exosome component 5 (predicted)                                                                                                  | Exosc5_predicted        | 1.19±0.15  |
| exosome component 7                                                                                                              | Exosc7                  | 1.36±0.23  |
| exosome component 8 (predicted)                                                                                                  | Exosc8_predicted        | 0.61±0.2   |
| exosome component 9                                                                                                              | Exosc9                  | 0.39±0.09  |
| exostoses (multiple) 1                                                                                                           | Ext1                    | 2.31±0.02  |
| exostoses (multiple) 2 (predicted)                                                                                               | Ext2_predicted          | 2.47±0.35  |
| exportin 1, CRM1 homolog (yeast)                                                                                                 | Xpo1                    | 3.77±0.35  |
| exportin 4 (predicted)                                                                                                           | Xpo4_predicted          | 0.35±0.15  |
| exportin 5 (predicted)                                                                                                           | Xpo5_predicted          | 0.61±0.22  |
| exportin 6                                                                                                                       | Xpo6                    | 2.49±0.4   |
| exportin 7                                                                                                                       | Xpo7                    | 5.42±0.5   |
| Exportin, tRNA (nuclear export receptor for tRNAs) (predicted)                                                                   | Xpot_predicted          | 1.52±0.13  |
| expressed in non-metastatic cells 1                                                                                              | Nme1                    | 2.15±0.88  |
| expressed in non-metastatic cells 2                                                                                              | Nme2                    | 21.73±6.65 |
| expressed in non-metastatic cells 4                                                                                              | Nme4                    | 0.22±0.07  |
| Eyes absent 3 homolog (Drosophila) (predicted)                                                                                   | Eya3_predicted          | 1.45±0.11  |
| F11 receptor                                                                                                                     | F11r                    | 1.32±1.2   |
| factor 8-associated gene A                                                                                                       | F8a                     | 3.64±0.13  |

|                                                                                                                |                      |            |
|----------------------------------------------------------------------------------------------------------------|----------------------|------------|
| family with sequence similarity 100, member A                                                                  | Fam100a              | 0.38±0.77  |
| family with sequence similarity 103, member A1                                                                 | Fam103a1             | 2.36±0.54  |
| family with sequence similarity 107, member B                                                                  | Fam107b              | 5.82±1.21  |
| family with sequence similarity 108, member A1                                                                 | Fam108a1             | 2.99±0.74  |
| family with sequence similarity 108, member C1                                                                 | Fam108c1             | 11.29±1.64 |
| family with sequence similarity 110, member B                                                                  | Fam110b              | 0.22±0.17  |
| family with sequence similarity 110, member C                                                                  | Fam110c              | 0.28±0.15  |
| family with sequence similarity 111, member A                                                                  | Fam111a              | 3.71±4.12  |
| family with sequence similarity 113, member A                                                                  | Fam113a              | 0.34±0.14  |
| family with sequence similarity 116, member A                                                                  | Fam116a              | 1.72±0.09  |
| family with sequence similarity 117, member A                                                                  | Fam117a              | 0.57±0.58  |
| family with sequence similarity 118, member A                                                                  | Fam118a              | 0.22±0.04  |
| family with sequence similarity 120A /// similar to Protein CXorf17 homolog /// hypothetical protein LOC683420 | Fam120a /// LOC6794E | 14.79±0.42 |
| family with sequence similarity 120B                                                                           | Fam120b              | 1.18±0.73  |
| family with sequence similarity 120C                                                                           | FAM120C              | 1.13±0.33  |
| family with sequence similarity 122A                                                                           | Fam122a              | 0.95±0.25  |
| family with sequence similarity 125, member A                                                                  | Fam125a              | 5.57±0.1   |
| family with sequence similarity 126, member B                                                                  | Fam126b              | 1.82±0.07  |
| family with sequence similarity 128, member B                                                                  | Fam128b              | 1.01±0.26  |
| family with sequence similarity 129, member B                                                                  | Fam129b              | 1.83±1.05  |
| family with sequence similarity 133, member B                                                                  | Fam133b              | 2.56±0.21  |
| family with sequence similarity 134, member A                                                                  | Fam134a              | 3.4±0.43   |
| family with sequence similarity 134, member B                                                                  | Fam134b              | 5.08±0.76  |
| family with sequence similarity 134, member C                                                                  | Fam134c              | 3.11±1.02  |
| family with sequence similarity 149, member B1                                                                 | Fam149b1             | 3.35±0.14  |
| family with sequence similarity 151, member B                                                                  | Fam151b              | 1.55±0.48  |
| family with sequence similarity 152, member A                                                                  | Fam152a              | 3.36±0.11  |
| family with sequence similarity 152, member B                                                                  | Fam152b              | 1.21±0.01  |
| family with sequence similarity 19 (chemokine (C-C motif)-like), member A5                                     | Fam19a5              | 0.7±0.09   |
| family with sequence similarity 20, member B                                                                   | Fam20b               | 3.95±0.52  |
| family with sequence similarity 20, member C                                                                   | Fam20c               | 3.07±0.44  |
| family with sequence similarity 21, member C                                                                   | Fam21c               | 5.99±0.1   |
| family with sequence similarity 3, member A                                                                    | Fam3a                | 2.44±0.25  |
| family with sequence similarity 32, member A                                                                   | Fam32a               | 3.54±0.62  |
| family with sequence similarity 35, member A                                                                   | Fam35a               | 0.76±0.09  |
| family with sequence similarity 40, member A                                                                   | Fam40a               | 1.26±0.21  |
| family with sequence similarity 43, member A                                                                   | Fam43a               | 7.54±2.69  |
| family with sequence similarity 44, member B                                                                   | Fam44b               | 1.68±0.01  |
| family with sequence similarity 45, member A                                                                   | Fam45a               | 1.47±0.14  |
| family with sequence similarity 48, member A                                                                   | Fam48a               | 2.6±0.15   |
| family with sequence similarity 49, member B                                                                   | Fam49b               | 1.2±0.26   |
| family with sequence similarity 50, member A                                                                   | FAM50A               | 2.78±0.63  |
| family with sequence similarity 53, member A                                                                   | Fam53a               | 0.8±0.04   |
| family with sequence similarity 54, member B                                                                   | Fam54b               | 7.04±1.51  |
| family with sequence similarity 55, member C /// hypothetical protein LOC682630                                | Fam55c /// LOC682630 | 0.28±0.13  |
| family with sequence similarity 58, member B                                                                   | Fam58b               | 2.58±0.63  |
| family with sequence similarity 63, member A                                                                   | Fam63a               | 8.36±0.4   |
| family with sequence similarity 73, member B                                                                   | Fam73b               | 3.95±1.32  |
| family with sequence similarity 76, member A                                                                   | Fam76a               | 0.45±0.36  |
| family with sequence similarity 80, member B                                                                   | Fam80b               | 1.32±0.31  |
| family with sequence similarity 81, member A                                                                   | Fam81a               | 2.77±0.58  |
| family with sequence similarity 82, member C                                                                   | Fam82c               | 1.22±0.35  |
| family with sequence similarity 84, member A                                                                   | Fam84a               | 5.39±0.29  |
| family with sequence similarity 92, member A1                                                                  | Fam92a1              | 7.27±1.23  |
| family with sequence similarity 96, member A                                                                   | Fam96a               | 7.56±2.04  |
| family with sequence similarity 96, member B                                                                   | Fam96b               | 2.01±0.6   |
| family with sequence similarity 98, member A                                                                   | Fam98a               | 1.98±0.67  |
| family with sequence similarity 98, member B                                                                   | Fam98b               | 1.2±0.38   |
| Fanconi anemia, complementation group C                                                                        | Fancc                | 0.2±0.02   |
| Fanconi anemia, complementation group E                                                                        | Fance                | 0.55±0.2   |
| Fanconi anemia, complementation group L (predicted)                                                            | Fancl_predicted      | 0.58±0.07  |
| far upstream element (FUSE) binding protein 1                                                                  | Fubp1                | 2.31±0.68  |
| farnesyl diphosphate farnesyl transferase 1                                                                    | Fdft1                | 5.27±2.19  |
| farnesyl diphosphate synthetase                                                                                | Fdps                 | 4.62±1.85  |
| farnesyltransferase, CAAX box, alpha                                                                           | Fnta                 | 3.59±0.44  |
| Fas (TNFRSF6) binding factor 1 (predicted)                                                                     | Fb1_predicted        | 0.39±0.19  |
| Fas (TNFRSF6)-associated via death domain                                                                      | Fadd                 | 0.47±0.17  |
| Fas apoptotic inhibitory molecule                                                                              | Faim                 | 1.93±0.4   |
| Fas death domain-associated protein                                                                            | Daxx                 | 0.64±0.42  |
| Fas-activated serine/threonine kinase                                                                          | Fastk                | 1.83±0.36  |
| Fas-associated factor 1                                                                                        | Faf1                 | 3.32±0.52  |
| fasciculation and elongation protein zeta 2 (zyglin II)                                                        | Fez2                 | 4.44±0.77  |
| FAST kinase domains 2                                                                                          | Fastkd2              | 1.45±0.58  |
| FAST kinase domains 3                                                                                          | Fastkd3              | 1.25±0.15  |
| FAT tumor suppressor homolog 1 (Drosophila)                                                                    | Fat1                 | 11.57±2.32 |
| fatty acid amide hydrolase                                                                                     | Faah                 | 2.18±0.81  |
| fatty acid binding protein 3, muscle and heart                                                                 | Fabp3                | 40.86±4.22 |
| fatty acid synthase                                                                                            | Fasn                 | 3.95±2.05  |
| FBJ osteosarcoma oncogene                                                                                      | Fos                  | 22.42±0.82 |
| F-box and leucine-rich repeat protein 10                                                                       | Fbx10                | 3.36±0.38  |
| F-box and leucine-rich repeat protein 11 (predicted)                                                           | Fbx11_predicted      | 1.52±0.28  |
| F-box and leucine-rich repeat protein 12                                                                       | Fbx12                | 0.75±0.37  |
| F-box and leucine-rich repeat protein 14 (predicted)                                                           | Fbx14_predicted      | 0.98±0.15  |
| F-box and leucine-rich repeat protein 19 (predicted)                                                           | Fbx19_predicted      | 0.24±0.04  |
| F-box and leucine-rich repeat protein 20                                                                       | Fbx20                | 0.67±0.22  |
| F-box and leucine-rich repeat protein 3                                                                        | Fbx3                 | 1.72±0.1   |
| F-box and leucine-rich repeat protein 4 (predicted)                                                            | Fbx4_predicted       | 2.05±0.12  |

|                                                                                                   |                       |            |
|---------------------------------------------------------------------------------------------------|-----------------------|------------|
| F-box and leucine-rich repeat protein 5 (predicted)                                               | Fbxl5_predicted       | 2.63±0.38  |
| F-box and leucine-rich repeat protein 6                                                           | Fbxl6                 | 0.66±0.05  |
| F-box and leucine-rich repeat protein 8                                                           | Fbxl8                 | 0.23±0.05  |
| F-box and WD-40 domain protein 11 (predicted)                                                     | Fbxw11_predicted      | 5.35±0.84  |
| F-box and WD-40 domain protein 2 (predicted)                                                      | Fbxw2_predicted       | 2.34±0.35  |
| F-box and WD-40 domain protein 4 (predicted)                                                      | Fbxw4_predicted       | 0.96±0.02  |
| F-box and WD-40 domain protein 5                                                                  | Fbxw5                 | 4.97±0.35  |
| F-box and WD-40 domain protein 8 (predicted)                                                      | Fbxw8_predicted       | 1.48±0.45  |
| F-box and WD-40 domain protein 9                                                                  | Fbxw9                 | 1.06±0.11  |
| F-box only protein 18 (predicted)                                                                 | Fbxo18_predicted      | 4.12±0.2   |
| F-box protein 11                                                                                  | Fbxo11                | 1.67±0.08  |
| F-box protein 16                                                                                  | Fbxo16                | 0.46±0.38  |
| F-box protein 21                                                                                  | Fbxo21                | 1.13±0.13  |
| F-box protein 22                                                                                  | Fbxo22                | 1.55±0.66  |
| F-box protein 25                                                                                  | Fbxo25                | 0.25±0.03  |
| F-box protein 28 (predicted)                                                                      | Fbxo28_predicted      | 1.09±0.01  |
| F-box protein 3                                                                                   | Fbxo3                 | 10.38±1.93 |
| F-box protein 33                                                                                  | Fbxo33                | 1.49±0.17  |
| F-box protein 34                                                                                  | Fbxo34                | 0.54±0.11  |
| F-box protein 38 (predicted)                                                                      | Fbxo38_predicted      | 1.31±0.01  |
| F-box protein 4                                                                                   | Fbxo4                 | 0.85±0.11  |
| F-box protein 44                                                                                  | Fbxo44                | 1.94±0.9   |
| F-box protein 46                                                                                  | Fbxo46                | 0.4±0.04   |
| F-box protein 6                                                                                   | Fbxo6                 | 2.17±0.04  |
| F-box protein 7                                                                                   | Fbxo7                 | 3.27±0.5   |
| F-box protein 8                                                                                   | Fbxo8                 | 1.95±0.74  |
| f-box protein 9                                                                                   | Fbxo9                 | 3.34±0.43  |
| Fc receptor, IgG, alpha chain transporter                                                         | Fcgrt                 | 3.95±0.92  |
| FCH domain only 2 (predicted)                                                                     | Fcho2_predicted       | 4.1±0.63   |
| fem-1 homolog c ( <i>C.elegans</i> ) (predicted)                                                  | Fem1c_predicted       | 2.71±0.33  |
| feminization 1 homolog a ( <i>C. elegans</i> )                                                    | Fem1a                 | 3.35±0.24  |
| fer (fms/fps related) protein kinase, testis specific 2                                           | Fert2                 | 0.33±0.04  |
| fer-1-like 3, myoferlin ( <i>C. elegans</i> )                                                     | Fer1l3                | 2.01±0.35  |
| FERM domain containing 8                                                                          | FrmD8                 | 2.55±0.24  |
| FERM, RhoGEF (Arhgef) and pleckstrin domain protein 1 (chondrocyte-derived) (predicted)           | Farp1_predicted       | 5.31±0.57  |
| FERM, RhoGEF and pleckstrin domain protein 2 (predicted)                                          | Farp2_predicted       | 0.48±0.16  |
| ferredoxin 1                                                                                      | Fdx1                  | 11.23±1.71 |
| ferredoxin 1-like                                                                                 | Fdx1l                 | 1.82±0.42  |
| ferredoxin reductase                                                                              | Fdxr                  | 0.99±0.02  |
| ferric-chelate reductase 1                                                                        | Frrs1                 | 0.57±0.12  |
| ferritin heavy chain 1                                                                            | Fth1                  | 61.5±2.05  |
| ferritin light chain 1                                                                            | Ftl1                  | 16.49±2.32 |
| ferrochelatase (predicted)                                                                        | Fech_predicted        | 2.3±0.46   |
| fetal Alzheimer antigen (predicted)                                                               | Falz_predicted        | 0.7±0.05   |
| FGF receptor activating protein 1                                                                 | Frag1                 | 1.63±0.52  |
| FGFR1 oncogene partner 2                                                                          | Fgfr1op2              | 1.48±0.04  |
| FH2 domain containing 1                                                                           | Fhdc1                 | 1.36±0.55  |
| fibrillarin                                                                                       | Fbl                   | 2.16±0.38  |
| fibroblast growth factor (acidic) intracellular binding protein                                   | Fibp                  | 1.83±0.41  |
| fibroblast growth factor 9                                                                        | Fgf9                  | 6.34±0.81  |
| fibroblast growth factor binding protein 3                                                        | Fgfbp3                | 1.49±0     |
| Fibroblast growth factor receptor 1                                                               | Fgfr1                 | 2.3±0.43   |
| fibroblast growth factor receptor 2                                                               | Fgfr2                 | 1.73±0.22  |
| fibroblast growth factor receptor 4                                                               | Fgfr4                 | 0.6±0.02   |
| fibroblast growth factor receptor substrate 2 (predicted)                                         | Frs2_predicted        | 2.28±0.5   |
| fibroblast growth factor receptor substrate 3                                                     | Frs3                  | 0.24±0.04  |
| fibronectin type III domain containing 3a (predicted)                                             | Fndc3a_predicted      | 0.8±0.52   |
| fibronectin type III domain containing 3B (predicted)                                             | Fndc3b_predicted      | 5.83±0.72  |
| FIG4 homolog ( <i>S. cerevisiae</i> )                                                             | Fig4                  | 1.01±0.02  |
| filamin, beta (predicted)                                                                         | Flnb_predicted        | 0.64±0.49  |
| Finkel-Biskis-Reilly murine sarcoma virus (FBR-MuSV) ubiquitously expressed (fox derived) protein | Fau /// LOC687439 /// | 33.42±0.9  |
| FIP1 like 1 ( <i>S. cerevisiae</i> )                                                              | Fip1l1                | 0.81±0.22  |
| fission 1 (mitochondrial outer membrane) homolog (yeast)                                          | Fis1                  | 6.16±0.5   |
| fizzy/cell division cycle 20 related 1 ( <i>Drosophila</i> ) (predicted)                          | Fzr1_predicted        | 2.03±0.39  |
| FK506 binding protein 12-rapamycin associated protein 1                                           | Frap1                 | 1.84±0.16  |
| FK506 binding protein 15                                                                          | Fkbp15                | 1.05±0.2   |
| FK506 binding protein 1a                                                                          | Fkbp1a                | 5.45±0.27  |
| FK506 binding protein 2 (predicted)                                                               | Fkbp2_predicted       | 5.32±0.14  |
| FK506 binding protein 3 (predicted)                                                               | Fkbp3_predicted       | 4.12±1.04  |
| FK506 binding protein 4                                                                           | Fkbp4                 | 4.23±0.98  |
| FK506 binding protein 5                                                                           | Fkbp5                 | 0.49±0.38  |
| FK506 binding protein 7 (predicted)                                                               | Fkbp7_predicted       | 0.29±0.13  |
| FK506 binding protein 8                                                                           | Fkbp8                 | 5.04±0.2   |
| FK506 binding protein 9                                                                           | Fkbp9                 | 13.61±1.76 |
| FK506 binding protein-like                                                                        | FkbpI                 | 0.59±0.52  |
| flavin adenine dinucleotide synthetase                                                            | Flad1                 | 2.06±0.56  |
| flavin containing monooxygenase 5                                                                 | Fmo5                  | 2.48±0.28  |
| flightless I homolog ( <i>Drosophila</i> )                                                        | Flii                  | 2.6±0.79   |
| flotillin 1                                                                                       | Flot1                 | 1.41±1.23  |
| flotillin 2                                                                                       | Flot2                 | 3.56±0.18  |
| FLT3-interacting zinc finger 1                                                                    | Fiz1                  | 1.99±0.04  |
| FLYWCH-type zinc finger 1                                                                         | Flywch1               | 3.7±0.09   |
| folate receptor 1 (adult)                                                                         | Folr1                 | 5.73±0.33  |
| folliculin                                                                                        | Fln                   | 2.19±0.46  |
| folliculin                                                                                        | Fst                   | 0.53±7.13  |
| folliculin-like 1                                                                                 | Fstl1                 | 0.92±1.35  |
| folliculin-like 3                                                                                 | Fstl3                 | 1.05±0.07  |

|                                                                                                                               |                      |            |
|-------------------------------------------------------------------------------------------------------------------------------|----------------------|------------|
| forkhead box J2                                                                                                               | Foxj2                | 1.17±0.35  |
| forkhead box J3 (predicted)                                                                                                   | Foxj3_predicted      | 2.21±0.33  |
| forkhead box K2 (predicted)                                                                                                   | Foxk2_predicted      | 1.14±0.04  |
| forkhead box N3                                                                                                               | Foxn3                | 1.54±0.3   |
| forkhead box O1                                                                                                               | Foxo1                | 1.11±0.29  |
| forkhead box O4                                                                                                               | Foxo4                | 1.24±0.02  |
| forkhead box P1                                                                                                               | Foxp1                | 1.16±0.48  |
| forkhead box Q1                                                                                                               | Foxq1                | 1.08±0.42  |
| formin binding protein 1                                                                                                      | Fnbp1                | 0.21±0.01  |
| formin binding protein 4                                                                                                      | Fnbp4                | 3.49±0.46  |
| formin homology 2 domain containing 1                                                                                         | Fhod1                | 0.61±0.14  |
| Forty-two-three domain containing 1                                                                                           | Fytd1                | 1.31±1.07  |
| four jointed box 1 (Drosophila) (predicted)                                                                                   | Fjx1_predicted       | 0.43±0.13  |
| fractured callus expressed transcript 1                                                                                       | Fxc1                 | 1.58±0.15  |
| fragile histidine triad gene                                                                                                  | Fhit                 | 0.91±0.07  |
| fragile X mental retardation syndrome 1 homolog                                                                               | Fmr1                 | 0.84±0.56  |
| fragile X mental retardation, autosomal homolog 1                                                                             | Fxr1                 | 0.75±0.14  |
| fragile X mental retardation, autosomal homolog 2                                                                             | Fxr2                 | 1.68±0.1   |
| frataxin (predicted)                                                                                                          | Fxn_predicted        | 1.88±0.3   |
| frizzled homolog 3 (Drosophila)                                                                                               | Fzd3                 | 0.31±0.03  |
| frizzled homolog 4 (Drosophila)                                                                                               | Fzd4                 | 1.5±0.96   |
| frizzled homolog 7 (Drosophila) (predicted)                                                                                   | Fzd7_predicted       | 0.26±0.06  |
| frizzled homolog 8 (Drosophila)                                                                                               | Fzd8                 | 0.54±0.19  |
| fructosamine 3 kinase                                                                                                         | Fn3k                 | 0.86±0.05  |
| FSHD region gene 1 (predicted)                                                                                                | Frq1_predicted       | 1.68±0.45  |
| Ftsj homolog 1 (E. coli) (predicted)                                                                                          | Ftsj1_predicted      | 0.31±0.18  |
| FtsJ homolog 3 (E. coli)                                                                                                      | Ftsj3                | 0.64±0.1   |
| fucokinase (predicted)                                                                                                        | Fuk_predicted        | 0.6±0.01   |
| fucosidase, alpha-L- 1, tissue                                                                                                | Fuca1                | 7.36±0.03  |
| fucosidase, alpha-L- 2, plasma                                                                                                | Fuca2                | 3.92±1.01  |
| fukutin related protein                                                                                                       | Fkrp                 | 0.48±0.14  |
| Fukuyama type congenital muscular dystrophy homolog (human) (predicted)                                                       | Fcmd_predicted       | 2.18±0.19  |
| fumarate hydratase 1                                                                                                          | Fh1                  | 24.2±3.93  |
| fumarylacetoacetate hydrolase domain containing 1                                                                             | Fahd1                | 7.7±0.85   |
| fumarylacetoacetate hydrolase domain containing 2A (predicted)                                                                | Fahd2a_predicted     | 6.19±0.85  |
| FUN14 domain containing 1                                                                                                     | Fundc1               | 1.45±0.76  |
| furin (paired basic amino acid cleaving enzyme)                                                                               | Furin                | 1.08±0.12  |
| FUS interacting protein (serine-arginine rich) 1                                                                              | Fusip1               | 0.25±0.13  |
| fused toes                                                                                                                    | Fts                  | 8.42±2.24  |
| fusion, derived from t(12;16) malignant liposarcoma (human)                                                                   | Fus                  | 8.03±0.76  |
| FXYD domain-containing ion transport regulator 2                                                                              | Fxyd2                | 49.83±3.07 |
| FXYD domain-containing ion transport regulator 6                                                                              | Fxyd6                | 20.33±1.2  |
| FYVE and coiled-coil domain containing 1 (predicted)                                                                          | Fyco1_predicted      | 4.16±0.25  |
| FYVE, RhoGEF and PH domain containing 1                                                                                       | Fgd1                 | 0.81±0.05  |
| G elongation factor, mitochondrial 1                                                                                          | Gfm1                 | 5.61±1.27  |
| G elongation factor, mitochondrial 2                                                                                          | Gfm2                 | 0.98±0.61  |
| G kinase anchoring protein 1                                                                                                  | Gkap1                | 1.47±0.07  |
| G patch domain and KOW motifs                                                                                                 | Gpkow                | 1.91±0.42  |
| G patch domain containing 1                                                                                                   | Gpatch1              | 0.22±0     |
| G protein beta subunit-like                                                                                                   | Gbl                  | 0.97±0.19  |
| G protein pathway suppressor 1                                                                                                | Gps1                 | 6.71±0.71  |
| G protein pathway suppressor 2                                                                                                | Gps2                 | 1.25±0.1   |
| G protein pathway suppressor 2 (predicted)                                                                                    | Gps2_predicted       | 0.86±0.17  |
| G protein-coupled receptor 107 (predicted)                                                                                    | Gpr107_predicted     | 1.05±0.24  |
| G protein-coupled receptor 108                                                                                                | Gpr108               | 1.09±0.27  |
| G protein-coupled receptor 114 (predicted)                                                                                    | Gpr114_predicted     | 0.25±0.02  |
| G protein-coupled receptor 125 (predicted)                                                                                    | Gpr125_predicted     | 0.78±0.41  |
| G protein-coupled receptor 137                                                                                                | Gpr137               | 0.82±0.34  |
| G protein-coupled receptor 137B (predicted)                                                                                   | Gpr137b_predicted    | 3.71±0.16  |
| G protein-coupled receptor 146                                                                                                | Gpr146               | 0.31±0.34  |
| G protein-coupled receptor 162 (predicted)                                                                                    | Gpr162_predicted     | 0.59±0.01  |
| G protein-coupled receptor 172B                                                                                               | Gpr172b              | 0.68±0.04  |
| G protein-coupled receptor 175                                                                                                | Gpr175               | 1.8±0.29   |
| G protein-coupled receptor 177                                                                                                | Gpr177               | 2.5±1.52   |
| G protein-coupled receptor 180                                                                                                | Gpr180               | 0.59±0.02  |
| G protein-coupled receptor 19                                                                                                 | Gpr19                | 0.4±0.11   |
| G protein-coupled receptor 56                                                                                                 | Gpr56                | 9.41±2.12  |
| G protein-coupled receptor 89 (predicted)                                                                                     | Gpr89_predicted      | 3.13±0.06  |
| G protein-coupled receptor associated sorting protein 1                                                                       | Gprasp1              | 0.92±0.11  |
| G protein-coupled receptor associated sorting protein 2                                                                       | Gprasp2              | 0.9±0      |
| G protein-coupled receptor kinase 4                                                                                           | Grk4                 | 0.63±0.23  |
| G protein-coupled receptor kinase 6                                                                                           | Grk6                 | 2.96±0.13  |
| G protein-coupled receptor kinase interactor 1                                                                                | Git1                 | 1.87±0.1   |
| G protein-coupled receptor kinase-interactor 2                                                                                | Git2                 | 0.71±0     |
| G protein-coupled receptor, family C, group 5, member C                                                                       | Gprc5c               | 3.7±0.72   |
| G1 to S phase transition 1                                                                                                    | Gspt1                | 6.22±0.57  |
| G1 to S phase transition 2                                                                                                    | Gspt2                | 0.74±0.22  |
| G7c protein                                                                                                                   | G7c                  | 0.3±0.02   |
| GA repeat binding protein, alpha (predicted)                                                                                  | Gabpa_predicted      | 1.56±0.21  |
| GA repeat binding protein, beta 1 /// similar to GA binding protein transcription factor, beta subunit 2 (GABPB2) (predicted) | Gabpb1 /// RGD15603C | 0.77±0.21  |
| GABA(A) receptor-associated protein like 2                                                                                    | Gabarapl2            | 21.15±0.93 |
| galactokinase 1                                                                                                               | Galk1                | 1.54±0.04  |
| galactokinase 2                                                                                                               | Galk2                | 3.3±0.68   |
| galactose mutarotase                                                                                                          | Galm                 | 19.22±4.93 |
| galactose-1-phosphate uridylyl transferase                                                                                    | Galt                 | 4.9±1.16   |
| galactosidase, beta 1 (predicted)                                                                                             | Glb1_predicted       | 6±0.74     |
| galactosidase, beta 1-like 2                                                                                                  | Glb1l2               | 2.1±0.08   |



|                                                                                               |                       |            |
|-----------------------------------------------------------------------------------------------|-----------------------|------------|
| galectin-related protein                                                                      | Hspc159               | 2±0.55     |
| gametogenetin                                                                                 | Ggn                   | 0.27±0.07  |
| gametogenetin binding protein 2                                                               | Ggnbp2                | 4.45±1.4   |
| gamma-aminobutyric acid (GABA(A)) receptor-associated protein-like 1 (predicted)              | Gabarap1_predicted // | 1.15±1.24  |
| gamma-aminobutyric acid receptor associated protein                                           | Gabarap               | 21.63±1.56 |
| gamma-glutamyl carboxylase                                                                    | Ggcx                  | 1.62±0.27  |
| gamma-glutamyl hydrolase                                                                      | Gqh                   | 2.22±3.91  |
| ganglioside-induced differentiation-associated-protein 2                                      | Gdap2                 | 1.16±0.32  |
| gap junction membrane channel protein alpha 4                                                 | Gja4                  | 0.44±1.18  |
| GATA zinc finger domain containing 1                                                          | Gatad1                | 1.52±0.21  |
| GATA zinc finger domain containing 2A                                                         | Gatad2a               | 0.96±0.14  |
| GATA zinc finger domain containing 2B                                                         | Gatad2b               | 0.32±0.16  |
| GCN1 general control of amino-acid synthesis 1-like 1 (yeast) (predicted)                     | Gcn111_predicted      | 1.04±0.04  |
| GCN5 general control of amino acid synthesis-like 2 (yeast) (predicted)                       | Gcn5l2_predicted      | 0.54±0.26  |
| GC-rich promoter binding protein 1                                                            | Gppb1                 | 5.24±0.28  |
| GDNF-inducible zinc finger protein 1                                                          | Gzf1                  | 1.18±0.03  |
| GDP dissociation inhibitor 2                                                                  | Gdi2                  | 15.25±0.06 |
| GDP-mannose 4, 6-dehydratase                                                                  | Gmds                  | 0.9±0.02   |
| GDP-mannose pyrophosphorylase A                                                               | Gmppa                 | 1.72±0.36  |
| GDP-mannose pyrophosphorylase B (predicted)                                                   | Gmppb_predicted       | 0.26±0.2   |
| gelsolin                                                                                      | Gsn                   | 4.1±0.18   |
| gem (nuclear organelle) associated protein 4                                                  | Gemin4                | 0.48±0.3   |
| gem (nuclear organelle) associated protein 6                                                  | Gemin6                | 0.43±0.18  |
| gem (nuclear organelle) associated protein 8                                                  | Gemin8                | 1.34±0.42  |
| general transcription factor II E, polypeptide 2 (beta subunit) (predicted)                   | Gtf2e2_predicted      | 1.87±0.5   |
| general transcription factor II H, polypeptide 1 (predicted)                                  | Gtf2h1_predicted      | 0.91±0.22  |
| general transcription factor II H, polypeptide 2 (predicted)                                  | Gtf2h2_predicted      | 0.26±0.73  |
| general transcription factor II I                                                             | Gtf2i                 | 3.84±0.03  |
| general transcription factor II I repeat domain-containing 1                                  | Gtf2ird1              | 2.73±0.25  |
| general transcription factor IIa 2                                                            | Gtf2a2                | 7.42±0.72  |
| general transcription factor II B                                                             | Gtf2b                 | 2.71±0.65  |
| general transcription factor IIF, polypeptide 1                                               | Gtf2f1                | 1.81±0.04  |
| general transcription factor IIF, polypeptide 2                                               | Gtf2f2                | 0.65±0.2   |
| general transcription factor IIH, polypeptide 3                                               | Gtf2h3                | 0.59±0.09  |
| general transcription factor IIH, polypeptide 5                                               | Gtf2h5                | 9.27±2     |
| general transcription factor III A                                                            | Gtf3a                 | 0.88±0.18  |
| general transcription factor III C 1                                                          | Gtf3c1                | 2.07±0.14  |
| general transcription factor IIIC, polypeptide 2, beta                                        | Gtf3c2                | 2.78±0.46  |
| general transcription factor IIIC, polypeptide 3                                              | Gtf3c3                | 1.17±0.87  |
| general transcription factor IIIC, polypeptide 4                                              | Gtf3c4                | 1.01±0.24  |
| general transcription factor IIIC, polypeptide 5 (predicted)                                  | Gtf3c5_predicted      | 0.54±0.13  |
| general transcription factor IIIC, polypeptide 6, alpha                                       | Gtf3c6                | 1.54±0.1   |
| genetic suppressor element 1                                                                  | Gse1                  | 0.37±0.25  |
| gephyrin                                                                                      | Gphn                  | 3.5±0.73   |
| geranylgeranyl diphosphate synthase 1                                                         | Ggps1                 | 0.33±0.12  |
| germ cell-less homolog 1 (Drosophila)                                                         | Gmcl1                 | 4.03±0.39  |
| GH3 domain containing                                                                         | Ghdc                  | 0.63±0.23  |
| GINS complex subunit 3 (Psf3 homolog)                                                         | Gins3                 | 0.33±0.26  |
| GINS complex subunit 4 (Sld5 homolog)                                                         | Gins4                 | 0.7±0.3    |
| GIPC PDZ domain containing family, member 1                                                   | Gipc1                 | 1.29±0.22  |
| GIY-YIG domain containing 2                                                                   | Giyd2                 | 0.59±0.3   |
| GLE1 RNA export mediator (yeast)                                                              | Gle1                  | 0.52±0.07  |
| GLE1 RNA export mediator-like (yeast)                                                         | Gle1l                 | 1.7±0.1    |
| glial cell line derived neurotrophic factor family receptor alpha 2                           | Gfra2                 | 0.2±0.07   |
| glial cell line derived neurotrophic factor family receptor alpha 3                           | Gfra3                 | 10.24±0.04 |
| GLI-Kruppel family member HKR3                                                                | Hkr3                  | 0.52±0.07  |
| glioblastoma amplified sequence                                                               | Gbas                  | 2.03±0.09  |
| glioma tumor suppressor candidate region gene 2                                               | Gltscr2               | 4.28±0.56  |
| GLIS family zinc finger 2 (predicted)                                                         | Glis2_predicted       | 5.67±2.49  |
| glomulin, FKBP associated protein                                                             | Glmn                  | 0.31±0.15  |
| glucagon receptor                                                                             | Gcgr                  | 6.93±0.13  |
| glucan (1,4-alpha-), branching enzyme 1                                                       | Gbe1                  | 14.66±1.64 |
| glucocorticoid modulatory element binding protein 2                                           | Gmeb2                 | 0.59±0.28  |
| glucosamine                                                                                   | Gne                   | 0.75±0.17  |
| glucosamine (N-acetyl)-6-sulfatase                                                            | Gns                   | 5.88±0.44  |
| glucosamine-phosphate N-acetyltransferase 1                                                   | Gnpnat1               | 5.5±0.12   |
| glucosaminyl (N-acetyl) transferase 1, core 2                                                 | Gcnt1                 | 1.22±0.08  |
| glucosaminyl (N-acetyl) transferase 2, l-branching enzyme                                     | Gcnt2                 | 8.76±2.15  |
| glucose 6 phosphatase, catalytic, 3                                                           | G6pc3                 | 5.6±1.09   |
| glucose phosphate isomerase                                                                   | Gpi                   | 23.25±5.18 |
| glucose-6-phosphatase, catalytic                                                              | G6pc                  | 2.7±1.15   |
| glucose-6-phosphate dehydrogenase X-linked                                                    | G6pdx                 | 4.16±0.11  |
| glucosidase 1                                                                                 | Gcs1                  | 1.85±0.67  |
| glucosidase, alpha, acid                                                                      | Gaa                   | 2.36±0.57  |
| glucuronidase, beta                                                                           | Gusb                  | 1.21±0.05  |
| glucuronyl C5-epimerase                                                                       | Glce                  | 1.28±0.11  |
| glutamate dehydrogenase 1                                                                     | Glud1                 | 9.95±1.88  |
| glutamate oxaloacetate transaminase 1, soluble                                                | Got1                  | 12.84±2.53 |
| glutamate oxaloacetate transaminase 2, mitochondrial                                          | Got2                  | 25.46±3.55 |
| glutamate oxaloacetate transaminase 2, mitochondrial                                          | Got2 / LOC297793 / LC | 0.34±0.29  |
| glutamate receptor, ionotropic, kainate 2                                                     | Grik2                 | 0.43±0.04  |
| glutamate receptor, ionotropic, kainate 5                                                     | Grik5                 | 0.2±0.08   |
| glutamate receptor, ionotropic, N-methyl D-aspartate-associated protein 1 (glutamate binding) | Grina                 | 9.51±0.45  |
| glutamate receptor, ionotropic, N-methyl D-aspartate-like 1A                                  | Grin1a                | 13.32±1.36 |
| glutamate-rich WD repeat containing 1                                                         | Grwd1                 | 0.53±0.2   |
| glutamic pyruvic transaminase 1, soluble                                                      | Gpt1                  | 0.3±0.27   |
| glutaminase                                                                                   | Gls                   | 7.25±0.39  |

|                                                                                                                   |                         |            |
|-------------------------------------------------------------------------------------------------------------------|-------------------------|------------|
| Glutamine and serine rich 1 (predicted)                                                                           | Qser1_predicted         | 0.34±1.21  |
| glutamyl-tRNA synthase (glutamine-hydrolyzing)-like 1                                                             | Qrs1                    | 1.82±0.53  |
| glutamyl-tRNA synthetase /// similar to glutamyl-tRNA synthetase (predicted)                                      | Qars /// RGD1562301_    | 7.33±1.03  |
| glutamyl-prolyl-tRNA synthetase                                                                                   | Eprs                    | 5.34±0.25  |
| glutamyl-tRNA synthetase 2 mitochondrial (putative)                                                               | Ears2                   | 0.43±0.1   |
| glutaredoxin 2 (thioltransferase)                                                                                 | Glrx2                   | 5.94±1.15  |
| glutaredoxin 3                                                                                                    | Glrx3                   | 5.31±1.36  |
| glutaredoxin 5 homolog (S. cerevisiae) (predicted)                                                                | Glrx5_predicted         | 19.48±2.78 |
| glutaryl-Coenzyme A dehydrogenase (predicted)                                                                     | Gcdh_predicted          | 9.1±0.31   |
| glutathione peroxidase 1                                                                                          | Gpx1                    | 2.1±4.47   |
| glutathione peroxidase 2                                                                                          | Gpx2                    | 0.42±0.49  |
| glutathione peroxidase 4                                                                                          | Gpx4                    | 18.17±0.01 |
| glutathione reductase                                                                                             | Gsr                     | 2.34±0.29  |
| glutathione S-transferase A3 /// glutathione-S-transferase, alpha type2 /// glutathione S-transferase Yc2 subunit | Gsta2 /// Gsta3 /// Yc2 | 6.99±1.28  |
| glutathione S-transferase kappa 1                                                                                 | Gstk1                   | 5.64±1.07  |
| glutathione S-transferase omega 1                                                                                 | Gsto1                   | 3.94±0.23  |
| glutathione S-transferase omega 2                                                                                 | Gsto2                   | 0.32±0.09  |
| glutathione S-transferase theta 1                                                                                 | Gstt1                   | 0.29±0.38  |
| glutathione S-transferase theta 1 /// glutathione S-transferase, theta 3                                          | Gstt1 /// Gstt3         | 3.75±6.02  |
| glutathione S-transferase, alpha 4                                                                                | Gsta4                   | 14.83±1.14 |
| glutathione S-transferase, mu 1                                                                                   | Gstm1                   | 2.1±0.02   |
| glutathione S-transferase, mu 2                                                                                   | Gstm2                   | 7.22±0.31  |
| glutathione S-transferase, mu 5                                                                                   | Gstm5                   | 0.2±0.23   |
| glutathione S-transferase, mu type 3                                                                              | Gstm3                   | 0.7±0.15   |
| glutathione S-transferase, theta 2                                                                                | Gstt2                   | 1.22±0.46  |
| glutathione synthetase                                                                                            | Gss                     | 2.11±0.98  |
| glutathione-S-transferase, pi 1                                                                                   | Gstp1                   | 16.81±1.81 |
| glyceraldehyde-3-phosphate dehydrogenase                                                                          | Gapdh                   | 51.97±1.5  |
| glyceraldehyde-3-phosphate dehydrogenase /// similar to glyceraldehyde-3-phosphate dehydrogenase                  | Gapdh /// LOC686275     | 50.83±2.78 |
| glycerol kinase                                                                                                   | Gyk                     | 1.41±0.09  |
| glycerol-3-phosphate dehydrogenase 1 (soluble)                                                                    | Gpd1                    | 1.51±0.17  |
| glycerol-3-phosphate dehydrogenase 2, mitochondrial                                                               | Gpd2                    | 0.78±0.11  |
| glyceronephosphate O-acyltransferase                                                                              | Gnpat                   | 2.2±0.57   |
| glycerophosphodiester phosphodiesterase 1                                                                         | Gde1                    | 7.68±1.44  |
| glycerophosphodiester phosphodiesterase domain containing 1 (predicted)                                           | Gdpd1_predicted         | 0.96±0.04  |
| glycerophosphodiester phosphodiesterase domain containing 5                                                       | Gdpd5                   | 0.5±0.13   |
| glycine C-acetyltransferase (2-amino-3-ketobutyrate-coenzyme A ligase)                                            | Gcat                    | 2.78±0.36  |
| glycine cleavage system protein H (aminomethyl carrier)                                                           | Gcsh                    | 7.06±0.68  |
| glycine N-methyltransferase                                                                                       | Gnmt                    | 6.18±0.16  |
| glycine-, glutamate-, thienylcyclohexylpiperidine-binding protein                                                 | LOC246295               | 0.4±0.36   |
| glycogen synthase kinase 3 alpha                                                                                  | Gsk3a                   | 0.55±0.3   |
| glycogen synthase kinase 3 beta                                                                                   | Gsk3b                   | 0.79±0.24  |
| glycogenin 1                                                                                                      | Gyg1                    | 4.47±0.57  |
| glycolipid transfer protein (predicted)                                                                           | Gltp_predicted          | 5.37±0.26  |
| glycolipid transfer protein domain containing 1                                                                   | Gltpd1                  | 2.33±0.51  |
| glycoprotein 2 (zymogen granule membrane)                                                                         | Gp2                     | 3.11±1     |
| glycoprotein lb, beta polypeptide /// septin 5                                                                    | Gp1bb /// Sept5         | 0.64±0.11  |
| glycoprotein, synaptic 2                                                                                          | Gpsn2                   | 15.97±4.09 |
| glycosylation dependent cell adhesion molecule 1                                                                  | Glycam1                 | 0.36±0.13  |
| glycosylphosphatidylinositol specific phospholipase D1                                                            | Gpld1                   | 0.89±0.32  |
| glycosyltransferase 25 domain containing 1 (predicted)                                                            | Glt25d1_predicted       | 0.58±0.03  |
| glycosyltransferase 8 domain containing 1                                                                         | Glt8d1                  | 1.43±0.4   |
| glycosyltransferase-like 1B                                                                                       | Gytl1b                  | 2.07±0.06  |
| glycosyltransferase-like domain containing 1                                                                      | Gtdc1                   | 0.68±0.2   |
| glycyl-tRNA synthetase                                                                                            | Gars                    | 5.6±1.62   |
| glyoxalase 1                                                                                                      | Glo1                    | 8.6±0.17   |
| glyoxalase domain containing 4                                                                                    | Glod4                   | 3.97±0.43  |
| glyoxalase domain containing 5                                                                                    | Glod5                   | 0.53±0     |
| glyoxylate reductase/hydroxypyruvate reductase (predicted)                                                        | Grhpr_predicted         | 2.44±0.89  |
| glypican 1                                                                                                        | Gpc1                    | 1.33±0.41  |
| glypican 4                                                                                                        | Gpc4                    | 11.21±0.99 |
| GNAS (guanine nucleotide binding protein, alpha stimulating) complex locus                                        | Gnas                    | 28.4±0.32  |
| golgi apparatus protein 1                                                                                         | Glg1                    | 1.33±0.04  |
| golgi associated PDZ and coiled-coil motif containing (predicted)                                                 | Gopc_predicted          | 1.74±0.29  |
| golgi associated, gamma adaptin ear containing, ARF binding protein 1                                             | Gga1                    | 1.06±0.22  |
| golgi associated, gamma adaptin ear containing, ARF binding protein 2                                             | Gga2                    | 8.74±1.99  |
| golgi associated, gamma adaptin ear containing, ARF binding protein 3 (predicted)                                 | Gga3_predicted          | 0.58±0.03  |
| golgi autoantigen, golgin subfamily a, 2                                                                          | Golga2                  | 1.33±0.22  |
| golgi autoantigen, golgin subfamily a, 3 (predicted)                                                              | Golga3_predicted        | 0.59±0.08  |
| golgi autoantigen, golgin subfamily a, 4                                                                          | Golga4                  | 3.04±0.66  |
| golgi autoantigen, golgin subfamily a, 5                                                                          | Golga5                  | 2.08±0.59  |
| golgi autoantigen, golgin subfamily a, 7                                                                          | Golga7                  | 8.12±0.05  |
| golgi autoantigen, golgin subfamily b, macrogolgin 1                                                              | Golgb1                  | 3.98±0.33  |
| golgi integral membrane protein 4                                                                                 | Golim4                  | 0.61±0.19  |
| golgi phosphoprotein 3                                                                                            | Golph3                  | 3.25±0.12  |
| golgi phosphoprotein 3-like                                                                                       | Golph3l                 | 1.93±0.41  |
| golgi reassembly stacking protein 1                                                                               | Goras1                  | 1.29±0.24  |
| golgi reassembly stacking protein 2                                                                               | Goras2                  | 1.97±0.89  |
| Golgi SNAP receptor complex member 1                                                                              | Gosr1                   | 2.45±0.87  |
| golgi SNAP receptor complex member 2                                                                              | Gosr2                   | 2.11±0.23  |
| golgi transport 1 homolog B (S. cerevisiae) (predicted)                                                           | Golt1b_predicted        | 0.41±0.12  |
| golgi-specific brefeldin A-resistance factor 1                                                                    | Gbf1                    | 1.77±0.42  |
| goliath                                                                                                           | LOC652955               | 10.87±0.95 |
| gonadotropin inducible ovarian transcription factor 1                                                             | Giot1                   | 0.29±0.43  |
| GPI-anchored membrane protein 1                                                                                   | Gpiap1                  | 9.17±0.46  |
| G-protein signalling modulator 3 (AGS3-like, C. elegans)                                                          | Gpsm3                   | 0.69±0.31  |
| GRAM domain containing 3                                                                                          | Gramd3                  | 4.42±1.21  |

|                                                                            |                        |            |
|----------------------------------------------------------------------------|------------------------|------------|
| grancalcin (predicted)                                                     | Gca_predicted          | 6.93±0.6   |
| granule cell antiserum positive 14                                         | Gcap14                 | 0.37±0.36  |
| granulin                                                                   | Grn                    | 19.01±0.51 |
| Granulocyte-macrophage colony stimulating receptor alpha                   | Csf2ra                 | 0.28±0.18  |
| GRB10 interacting GYF protein 1                                            | Gigyf1                 | 0.76±0.19  |
| G-rich RNA sequence binding factor 1                                       | Grsf1                  | 16.69±2.22 |
| GRINL1A combined protein                                                   | Gcom1                  | 0.58±0.05  |
| GRIP and coiled-coil domain containing 2                                   | Gcc2                   | 1.61±0.02  |
| GRIP1 associated protein 1                                                 | Gripap1                | 0.88±0.03  |
| growth arrest and DNA-damage-inducible 45 alpha                            | Gadd45a                | 11.52±1.19 |
| growth arrest and DNA-damage-inducible 45 beta                             | Gadd45b                | 1.45±3.35  |
| growth arrest and DNA-damage-inducible 45 gamma                            | Gadd45g                | 14.88±1.87 |
| growth arrest and DNA-damage-inducible, gamma interacting protein 1        | Gadd45qip1             | 3.68±0.89  |
| growth arrest specific 5                                                   | Gas5                   | 1.42±0.22  |
| growth arrest specific 6                                                   | Gas6                   | 10.62±1.57 |
| growth arrest-specific 2 like 1 (predicted)                                | Gas2l1_predicted       | 1.27±0.25  |
| Growth differentiation factor 11                                           | Gdf11                  | 0.44±0.21  |
| growth factor receptor bound protein 2                                     | Grb2                   | 3.64±0.28  |
| growth factor receptor bound protein 2-associated protein 1 (predicted)    | Gab1_predicted         | 1.85±0.54  |
| growth factor receptor bound protein 7                                     | Grb7                   | 1.1±0.46   |
| growth factor, erv1 (S. cerevisiae)-like (augmenter of liver regeneration) | Gfer                   | 0.57±0.1   |
| growth hormone inducible transmembrane protein                             | Ghitm                  | 12.07±1.43 |
| growth hormone receptor                                                    | Ghr                    | 0.33±0.28  |
| GrpE-like 1, mitochondrial                                                 | Grpel1                 | 8.02±0.06  |
| GrpE-like 2, mitochondrial                                                 | Grpel2                 | 0.42±0.04  |
| GSG1-like /// similar to germ cell associated 1 (predicted)                | Gsg1l /// LOC687697    | 0.28±0.01  |
| GTP binding protein 1 (predicted)                                          | Gtpbp1_predicted       | 0.88±0.24  |
| GTP binding protein 2                                                      | Gtpbp2                 | 4.24±0.14  |
| GTP binding protein 3 (mitochondrial)                                      | Gtpbp3                 | 0.65±0.17  |
| GTP binding protein 4                                                      | Gtpbp4 /// LOC689842   | 0.66±0.11  |
| GTP binding protein 5                                                      | Gtpbp5                 | 2.01±0.18  |
| GTP binding protein 6 (putative) (predicted)                               | Gtpbp6_predicted       | 1.1±0.05   |
| GTP cyclohydrolase I feedback regulator                                    | Gchfr                  | 0.41±0.15  |
| GTPase activating protein and VPS9 domains 1 (predicted)                   | Gapvd1_predicted       | 1.75±0.57  |
| GTPase activating RANGAP domain-like 1                                     | Garnl1                 | 0.68±0.35  |
| GTPase activating RANGAP domain-like 4 (predicted)                         | Garnl4_predicted       | 5.54±0.43  |
| GTP-binding protein 10 (putative)                                          | Gtpbp10                | 1.26±0.26  |
| guanine monophosphate synthetase                                           | Gmps                   | 3.03±0.89  |
| guanine nucleotide binding protein (G protein), beta 5                     | Gnb5                   | 2.17±0.47  |
| guanine nucleotide binding protein (G protein), beta polypeptide 2 like 1  | Gnb2l1                 | 20.42±2.88 |
| guanine nucleotide binding protein (G protein), gamma 10                   | Gng10                  | 3.4±0.71   |
| guanine nucleotide binding protein (G protein), gamma 12                   | Gng12                  | 5.5±1.44   |
| guanine nucleotide binding protein (G protein), gamma 5                    | Gng5                   | 21.03±0.95 |
| guanine nucleotide binding protein, alpha 11                               | Gna11                  | 0.84±0.25  |
| guanine nucleotide binding protein, alpha 12                               | Gna12                  | 0.33±0.14  |
| guanine nucleotide binding protein, alpha 14                               | Gna14                  | 1.74±0.4   |
| guanine nucleotide binding protein, alpha inhibiting 1                     | Gnai1                  | 1.69±0.26  |
| guanine nucleotide binding protein, alpha inhibiting 2                     | Gnai2                  | 0.75±0.1   |
| guanine nucleotide binding protein, alpha inhibiting 3                     | Gnai3                  | 6.47±1.53  |
| guanine nucleotide binding protein, alpha stimulating, olfactory type      | Gnal                   | 0.59±0.1   |
| guanine nucleotide binding protein, beta 1                                 | Gnb1                   | 4.79±0.59  |
| guanine nucleotide binding protein, beta 2                                 | Gnb2                   | 5.15±0.14  |
| guanine nucleotide binding protein-like 1                                  | Gnl1                   | 1.79±0.33  |
| guanine nucleotide binding protein-like 2 (nucleolar)                      | Gnl2                   | 0.34±0.04  |
| guanine nucleotide binding protein-like 3 (nucleolar)                      | Gnl3                   | 1.15±0.14  |
| guanosine diphosphate dissociation inhibitor 1                             | Gdi1                   | 4.62±0.81  |
| guanosine monophosphate reductase                                          | Gmpr                   | 2.7±0.22   |
| guanosine monophosphate reductase 2                                        | Gmpr2                  | 1.98±0.52  |
| guanylate cyclase 2g                                                       | Gucy2g                 | 0.25±0.15  |
| guanylate kinase 1                                                         | Guk1                   | 6.38±1.23  |
| GULP, engulfment adaptor PTB domain containing 1                           | Gulp1                  | 3.9±1.41   |
| gypsy retrotransposon integrase 1                                          | Gin1                   | 0.56±0.25  |
| H1 histone family, member 0                                                | H1f0                   | 21.75±0.17 |
| H1 histone family, member X                                                | H1fx                   | 2.25±0.44  |
| H2A histone family, member J                                               | H2afj                  | 3.71±1.09  |
| H2A histone family, member V (predicted)                                   | H2afv_predicted /// LO | 8.21±0.38  |
| H2A histone family, member X                                               | H2afx                  | 0.94±0.03  |
| H2A histone family, member Y                                               | H2afy                  | 6.21±0.29  |
| H2A histone family, member Z                                               | H2afz                  | 20.7±1.68  |
| H3 histone, family 3B                                                      | H3f3b                  | 26.66±0.91 |
| hairy and enhancer of split 1 (Drosophila)                                 | Hes1                   | 1.75±1.94  |
| hairy and enhancer of split 6 (Drosophila)                                 | Hes6                   | 9.65±2.41  |
| Hairy/enhancer-of-split related with YRPW motif 1                          | Hey1                   | 0.32±0.29  |
| haloacid dehalogenase-like hydrolase domain containing 2                   | Hdhd2                  | 2.48±0.14  |
| Harvey rat sarcoma virus oncogene                                          | Hras                   | 4.57±0.63  |
| Hbs1-like (S. cerevisiae)                                                  | Hbs1l                  | 2.12±0.04  |
| HCCA2 protein                                                              | Hcca2                  | 0.87±0.25  |
| HCR (a-helix coiled-coil rod homolog)                                      | Hcr                    | 0.88±0.17  |
| HD domain containing 2 (predicted)                                         | Hddc2_predicted        | 0.85±0.09  |
| HD domain containing 3 (predicted)                                         | Hddc3_predicted        | 7.9±3.22   |
| headcase homolog (Drosophila) (predicted)                                  | Heca_predicted         | 2.02±0.56  |
| HEAT repeat containing 1 (predicted)                                       | Heatr1_predicted       | 0.25±0.11  |
| HEAT repeat containing 2                                                   | Heatr2                 | 1.22±0.56  |
| HEAT repeat containing 5A                                                  | Heatr5a                | 1.41±0.39  |
| HEAT repeat containing 5B                                                  | Heatr5b                | 0.49±0.25  |
| HEAT repeat containing 6                                                   | Heatr6                 | 0.25±0.09  |
| heat shock 10 kDa protein 1 (chaperonin 10)                                | Hspe1                  | 22.99±1.42 |

|                                                                                                                        |                      |             |
|------------------------------------------------------------------------------------------------------------------------|----------------------|-------------|
| heat shock 105kDa/110kDa protein 1                                                                                     | Hsph1                | 16.05±1.8   |
| heat shock 70kD protein 1A /// heat shock 70kD protein 1B (mapped)                                                     | Hspa1a /// Hspa1b    | 46.48±12.15 |
| heat shock 70kD protein 1B (mapped)                                                                                    | Hspa1b               | 45.88±8.62  |
| heat shock 70kDa protein 12A (predicted)                                                                               | Hspa12a_predicted    | 0.42±0.42   |
| heat shock factor 2                                                                                                    | Hsf2                 | 1.01±0.12   |
| heat shock factor binding protein 1                                                                                    | Hsbp1                | 5.84±0.66   |
| heat shock protein 1                                                                                                   | Hspb1                | 5.2±9.4     |
| heat shock protein 1 (chaperonin)                                                                                      | Hspd1                | 33.23±0.74  |
| heat shock protein 14                                                                                                  | Hspa14               | 2.35±0.73   |
| heat shock protein 2                                                                                                   | Hspa2                | 0.63±0.06   |
| heat shock protein 4                                                                                                   | Hspa4                | 3.59±0.65   |
| heat shock protein 5                                                                                                   | Hspa5                | 8.31±1.14   |
| heat shock protein 8                                                                                                   | Hspa8                | 51.9±11.4   |
| heat shock protein 9                                                                                                   | Hspa9                | 18.33±3.61  |
| heat shock protein 90, alpha (cytosolic), class A member 1                                                             | Hsp90aa1             | 33.5±4.55   |
| heat shock protein 90kDa alpha (cytosolic), class B member 1                                                           | Hsp90ab1             | 24.84±0.15  |
| heat shock protein, alpha-crystallin-related, B6                                                                       | Hspb6                | 5.11±0.76   |
| heat shock transcription factor 1                                                                                      | Hsf1                 | 0.61±0.06   |
| heat-responsive protein 12                                                                                             | Hrsp12               | 4.46±2.9    |
| hect (homologous to the E6-AP (UBE3A) carboxyl terminus) domain and RCC1 (CHC1)-like domain (RLD) 1 (predicted)        | Herc1_predicted      | 2.25±0.18   |
| hect (homologous to the E6-AP (UBE3A) carboxyl terminus) domain and RCC1 (CHC1)-like domain (RLD) 2 (predicted)        | Herc2_predicted      | 1.6±0.12    |
| HECT domain and ankyrin repeat containing, E3 ubiquitin protein liqase 1 (predicted)                                   | Hace1_predicted      | 1.2±0.04    |
| hect domain and RLD 3 (predicted)                                                                                      | Herc3_predicted      | 2.45±1.04   |
| hect domain and RLD 4                                                                                                  | Herc4                | 2.08±0.57   |
| HECT domain containing 1                                                                                               | Hectd1               | 8.14±1.27   |
| hedgehog interacting protein-like 1                                                                                    | Hhip1                | 0.23±0.07   |
| helicase with zinc finger domain (predicted)                                                                           | Helz_predicted       | 0.78±0.06   |
| helicase-like transcription factor                                                                                     | Hlitf                | 1.6±0.26    |
| hematological and neurological expressed 1-like                                                                        | Hn1l                 | 2.9±0.86    |
| hematological and neurological expressed sequence 1                                                                    | Hn1                  | 1.38±0.2    |
| heme binding protein 1 (predicted)                                                                                     | Hebp1_predicted      | 2.85±0.76   |
| heme oxygenase (decycling) 1                                                                                           | Hmox1                | 0.4±1.09    |
| heme oxygenase (decycling) 2                                                                                           | Hmox2                | 2.51±0.64   |
| HemK methyltransferase family member 1 (predicted)                                                                     | Hemk1_predicted      | 0.67±0.19   |
| heparan sulfate 2-O-sulfotransferase 1                                                                                 | Hs2st1               | 2.06±0.17   |
| heparan sulfate 6-O-sulfotransferase 1 (predicted)                                                                     | Hs6st1_predicted     | 0.99±0.05   |
| hepatitis B virus x interacting protein (predicted)                                                                    | Hbxip_predicted      | 11.22±1.33  |
| hepatocyte growth factor activator                                                                                     | Hgfac                | 0.4±0.18    |
| hepatoma-derived growth factor                                                                                         | Hdgf                 | 1.73±0.17   |
| hepatoma-derived growth factor, related protein 2                                                                      | Hdgfrp2              | 0.62±0.11   |
| hepatoma-derived growth factor, related protein 3                                                                      | Hdgfrp3              | 0.33±0.08   |
| hepsin                                                                                                                 | Hpn                  | 8.35±1.28   |
| Hermansky-Pudlak syndrome 1 homolog (human)                                                                            | Hps1                 | 4.6±0.13    |
| Hermansky-Pudlak syndrome 3 homolog (human) (predicted)                                                                | Hps3_predicted       | 0.74±0.15   |
| Hermansky-Pudlak syndrome 4 homolog (human) (predicted)                                                                | Hps4_predicted       | 0.41±0.1    |
| HERPUD family member 2                                                                                                 | Herpu2               | 3.35±0.14   |
| heterochromatin protein 1, binding protein 3                                                                           | Hp1bp3               | 7.22±0.55   |
| heterogeneous nuclear ribonucleoprotein A/B                                                                            | Hnrpab               | 11.25±0.8   |
| heterogeneous nuclear ribonucleoprotein A1                                                                             | Hnrnpa1              | 2.32±0.21   |
| heterogeneous nuclear ribonucleoprotein A2/B1 /// similar to heterogeneous nuclear ribonucleoprotein A2/B1 (predicted) | Hnrnpa2b1 /// RGD156 | 3.1±0.87    |
| heterogeneous nuclear ribonucleoprotein A3                                                                             | Hnrpa3               | 9.77±1.45   |
| heterogeneous nuclear ribonucleoprotein C                                                                              | Hnrnpc               | 7.06±1.23   |
| heterogeneous nuclear ribonucleoprotein D                                                                              | Hnrpd                | 1.99±0.27   |
| heterogeneous nuclear ribonucleoprotein D-like                                                                         | Hnrpdl               | 5.21±1.6    |
| heterogeneous nuclear ribonucleoprotein F                                                                              | Hnrpf                | 2.92±0.22   |
| heterogeneous nuclear ribonucleoprotein H1                                                                             | Hnrph1               | 15.55±2.2   |
| heterogeneous nuclear ribonucleoprotein H3                                                                             | Hnrph3               | 3.58±0.53   |
| heterogeneous nuclear ribonucleoprotein K                                                                              | Hnrpk                | 16.81±2.33  |
| heterogeneous nuclear ribonucleoprotein L                                                                              | Hnrpl                | 15.32±0.56  |
| heterogeneous nuclear ribonucleoprotein L-like (predicted)                                                             | Hnrpll_predicted     | 2.39±0.69   |
| heterogeneous nuclear ribonucleoprotein M                                                                              | Hnrpm                | 1.34±0.07   |
| heterogeneous nuclear ribonucleoprotein R                                                                              | Hnrnr                | 5.07±0.44   |
| heterogeneous nuclear ribonucleoprotein U                                                                              | Hnrnpu               | 9.16±0.9    |
| heterogeneous nuclear ribonucleoprotein U-like 1 (predicted)                                                           | Hnrpu1_predicted     | 1.42±0.04   |
| hexamethylene bis-acetamide inducible 1                                                                                | Hexim1               | 4.07±1.6    |
| hexamethylene bis-acetamide inducible 2 (predicted)                                                                    | Hexim2_predicted     | 0.24±0.29   |
| hexokinase 1                                                                                                           | Hk1                  | 11.86±2.99  |
| hexosaminidase A                                                                                                       | Hexa                 | 5.99±0.78   |
| hexosaminidase B                                                                                                       | Hexb                 | 9.72±1.47   |
| hexose-6-phosphate dehydrogenase (glucose 1-dehydrogenase) (predicted)                                                 | H6pd_predicted       | 0.25±0.06   |
| HGF-regulated tyrosine kinase substrate                                                                                | Hgs                  | 3.37±0.03   |
| HIG1 domain family, member 1A                                                                                          | Higd1a               | 11.07±0.25  |
| HIG1 domain family, member 2A (predicted)                                                                              | Higd2a_predicted     | 9.93±1.21   |
| high density lipoprotein binding protein                                                                               | Hdlbp                | 4.96±0.65   |
| high mobility group 20 B (predicted)                                                                                   | Hmg20b_predicted     | 1.9±0.43    |
| high mobility group 20A (predicted)                                                                                    | Hmg20a_predicted     | 1.89±0.35   |
| high mobility group AT-hook 1                                                                                          | Hmga1                | 0.68±0.2    |
| high mobility group box 1                                                                                              | Hmgb1                | 10.51±0.48  |
| high mobility group box 1                                                                                              | Hmgb1 /// LOC678705  | 12.69±0.72  |
| high mobility group box 2                                                                                              | Hmgb2                | 4.35±1.23   |
| high mobility group box 2-like 1 (predicted)                                                                           | Hmgb2l1_predicted    | 0.6±0.24    |
| high mobility group box 3                                                                                              | Hmgb3                | 2.76±0.08   |
| high mobility group box transcription factor 1                                                                         | Hbp1                 | 2.89±0.23   |
| high mobility group nucleosomal binding domain 1                                                                       | Hmgn1                | 22.08±3.68  |
| high mobility group nucleosomal binding domain 2                                                                       | Hmgn2                | 11.77±2.34  |
| high mobility group nucleosomal binding domain 3                                                                       | Hmgn3                | 9.77±1.68   |
| hippocalcin-like 1                                                                                                     | Hpcal1               | 4.08±0.76   |

|                                                                                                                                   |                         |            |
|-----------------------------------------------------------------------------------------------------------------------------------|-------------------------|------------|
| hippocampus abundant gene transcript 1 (predicted)                                                                                | Hiat1_predicted         | 4.85±1.04  |
| hippocampus abundant transcript-like 1                                                                                            | Hiat1                   | 4.65±0.71  |
| HIRA interacting protein 3                                                                                                        | Hirip3                  | 1.45±0.58  |
| histidine acid phosphatase domain containing 2A                                                                                   | Hisppd2a                | 1.83±0.28  |
| histidine triad nucleotide binding protein 2 (predicted)                                                                          | Hint2_predicted         | 9.59±0.48  |
| histidine triad nucleotide binding protein 3                                                                                      | Hint3                   | 1.86±0.62  |
| histocompatibility 13 (predicted)                                                                                                 | H13_predicted           | 4.66±0.27  |
| histone aminotransferase 1                                                                                                        | Hat1                    | 6.73±1.11  |
| histone cluster 1, H1d                                                                                                            | Hist1h1d                | 1.68±0.16  |
| histone cluster 1, H2b1 /// histone cluster 1, H2bh /// histone cluster 1, H2bc /// similar to Histone H2B 291B                   | Hist1h2bc /// Hist1h2bh | 1.41±1.92  |
| histone cluster 1, H3f                                                                                                            | Hist1h3f                | 0.3±0.1    |
| histone cluster 1, H4b                                                                                                            | Hist1h4b                | 3.28±1.34  |
| histone cluster 3, H2a                                                                                                            | Hist3h2a                | 0.33±0.6   |
| histone cluster 3, H2ba (predicted)                                                                                               | Hist3h2ba_predicted     | 0.53±0.45  |
| histone deacetylase 1 (predicted)                                                                                                 | Hdac1_predicted         | 1.1±0.01   |
| histone deacetylase 1 /// histone deacetylase 1 (predicted)                                                                       | Hdac1 /// Hdac1_predit  | 1.55±0.09  |
| histone deacetylase 11 (predicted)                                                                                                | Hdac11_predicted        | 4.69±0.26  |
| histone deacetylase 2                                                                                                             | Hdac2                   | 5.05±1.05  |
| histone deacetylase 3                                                                                                             | Hdac3                   | 1.72±0.15  |
| histone deacetylase 5                                                                                                             | Hdac5                   | 1.8±0.12   |
| histone deacetylase 8 (predicted)                                                                                                 | Hdac8_predicted         | 0.39±0.13  |
| histone H4 variant H4-v.1 (predicted)                                                                                             | RGD1562378_predicte     | 0.21±0.11  |
| HIV TAT specific factor 1 (predicted)                                                                                             | Htatsf1_predicted       | 3.14±0.41  |
| HIV-1 Rev binding protein 2 (predicted)                                                                                           | Hrb2_predicted          | 0.69±0.35  |
| HIV-1 Rev binding protein-like (predicted)                                                                                        | Hrb1_predicted          | 0.3±0.17   |
| HIV-1 tat interactive protein, homolog (human)                                                                                    | Htatip                  | 1.98±0.39  |
| HLA-B associated transcript 2                                                                                                     | Bat2                    | 2.96±0.17  |
| HLA-B associated transcript 5                                                                                                     | Bat5                    | 6.4±2.98   |
| HLA-B-associated transcript 1A                                                                                                    | Bat1a                   | 5.89±0.96  |
| HLA-B-associated transcript 3                                                                                                     | Bat3                    | 1.83±0.21  |
| HNF1 homeobox B                                                                                                                   | Hnf1b                   | 3.49±1.21  |
| hnRNP-associated with lethal yellow                                                                                               | Raly                    | 2.4±0.53   |
| holocarboxylase synthetase (biotin- [propionyl-Coenzyme A-carboxylase (ATP-hydrolysing)] ligase)                                  | Hlcs                    | 0.23±0.02  |
| holocytochrome c synthetase (predicted)                                                                                           | Hccs_predicted          | 3.46±0.92  |
| homeo box A10                                                                                                                     | Hoxa10                  | 8.05±3.25  |
| homeo box A2                                                                                                                      | Hoxa2                   | 0.58±0.21  |
| homeo box A4                                                                                                                      | Hoxa4                   | 1.65±0.25  |
| homeo box A5                                                                                                                      | Hoxa5                   | 9.42±0.83  |
| homeo box A9 (predicted)                                                                                                          | Hoxa9_predicted         | 4.84±1.71  |
| homeo box B3 (predicted)                                                                                                          | Hoxb3_predicted         | 1.17±0.58  |
| homeo box B4                                                                                                                      | Hoxb4                   | 1.7±0.12   |
| homeo box B5                                                                                                                      | Hoxb5                   | 0.72±0.01  |
| homeo box B6                                                                                                                      | Hoxb6                   | 9.72±1.61  |
| homeo box B7                                                                                                                      | Hoxb7                   | 1.86±0.06  |
| homeo box B8                                                                                                                      | Hoxb8                   | 0.35±0.12  |
| homeo box C10                                                                                                                     | Hoxc10                  | 3.91±0.77  |
| homeo box C4                                                                                                                      | Hoxc4                   | 0.35±0.12  |
| homeo box C5 (predicted)                                                                                                          | Hoxc5_predicted         | 0.67±0.36  |
| homeo box D10 (predicted)                                                                                                         | Hoxd10_predicted        | 13.09±1.72 |
| homeobox A9                                                                                                                       | Hoxa9                   | 3.15±0.47  |
| homeobox C9                                                                                                                       | Hoxc9                   | 1.04±0.26  |
| homeodomain interacting protein kinase 1 (predicted)                                                                              | Hipk1_predicted         | 4±0.29     |
| Homeodomain interacting protein kinase 2 (predicted)                                                                              | Hipk2_predicted         | 4.31±0.69  |
| homeodomain interacting protein kinase 3                                                                                          | Hipk3                   | 0.48±0.15  |
| homer homolog 1 (Drosophila)                                                                                                      | Homer1                  | 3.81±0.3   |
| Homer homolog 3 (Drosophila)                                                                                                      | Homer3                  | 0.43±0.14  |
| homocysteine-inducible, endoplasmic reticulum stress-inducible, ubiquitin-like domain member 1                                    | Herpud1                 | 12.39±4.43 |
| homolog of zebrafish ES1                                                                                                          | RGD1303003              | 10.92±0.35 |
| hook homolog 1 (Drosophila) (predicted)                                                                                           | Hook1_predicted         | 1.75±0.23  |
| hook homolog 2 (Drosophila)                                                                                                       | Hook2                   | 0.6±0.11   |
| hook homolog 3 (Drosophila)                                                                                                       | Hook3                   | 0.95±0.23  |
| hormone-regulated proliferation associated protein 20                                                                             | Hrpap20                 | 3.59±1.59  |
| host cell factor C1 (predicted)                                                                                                   | Hcfc1_predicted         | 2.65±0.09  |
| host cell factor C1 regulator 1 (XPO1-dependent)                                                                                  | Hcfc1r1                 | 8.63±0.66  |
| host cell factor C2                                                                                                               | Hcfc2                   | 0.9±0.08   |
| HpaII tiny fragments locus 9c                                                                                                     | Htf9c                   | 0.87±0.01  |
| HRAS like suppressor 3                                                                                                            | Hrasls3                 | 4.46±0.63  |
| HscB iron-sulfur cluster co-chaperone homolog (E. coli)                                                                           | Hscb                    | 0.96±0.18  |
| hsp70-interacting protein                                                                                                         | Hspbp1                  | 1.9±0.23   |
| Hspb associated protein 1                                                                                                         | Hspbp1                  | 0.23±0.07  |
| HtrA serine peptidase 2                                                                                                           | Htra2                   | 2.35±0.31  |
| human immunodeficiency virus type I enhancer binding protein 1                                                                    | Hivep1                  | 1.1±0.33   |
| human immunodeficiency virus type I enhancer binding protein 2                                                                    | Hivep2                  | 0.78±0.28  |
| huntingtin                                                                                                                        | Htt                     | 0.56±0.13  |
| Huntingtin interacting protein 1                                                                                                  | Hip1                    | 2.68±0.57  |
| huntingtin interacting protein 1 related                                                                                          | Hip1r                   | 0.33±0.08  |
| huntingtin interacting protein 2 (predicted)                                                                                      | Hip2_predicted          | 7.82±1.75  |
| Huntingtin interacting protein K                                                                                                  | Hypk                    | 7.95±1.06  |
| HUS1 checkpoint homolog (S. pombe)                                                                                                | Hus1                    | 1.3±0.18   |
| hyaluronan mediated motility receptor (RHAMM)                                                                                     | Hmmr                    | 0.58±0.18  |
| hyaluronic acid binding protein 4 (predicted)                                                                                     | Habp4_predicted         | 2.74±0.14  |
| hyaluronoglucosaminidase 2                                                                                                        | Hyal2                   | 1.34±0.02  |
| hyaluronoglucosaminidase 3                                                                                                        | Hyal3                   | 2.88±0.68  |
| hydroxyacyl glutathione hydrolase                                                                                                 | Hagh                    | 3.35±1.41  |
| hydroxyacyl-Coenzyme A dehydrogenase                                                                                              | Hadh                    | 16.64±3.56 |
| hydroxyacyl-Coenzyme A dehydrogenase/3-ketoacyl-Coenzyme A thiolase/enoyl-Coenzyme A hydratase (trifunctional protein), alpha sub | Hadhalpha               | 15.9±2.13  |
| hydroxyacyl-Coenzyme A dehydrogenase/3-ketoacyl-Coenzyme A thiolase/enoyl-Coenzyme A hydratase (trifunctional protein), beta sub  | Hadhbeta                | 29.15±8.55 |

|                                                                              |                      |            |
|------------------------------------------------------------------------------|----------------------|------------|
| hydroxy-delta-5-steroid dehydrogenase, 3 beta- and steroid delta-isomerase 7 | Hsd3b7               | 0.88±0.07  |
| hydroxymethylbilane synthase                                                 | Hmbs                 | 2.3±0.46   |
| hydroxyprostaglandin dehydrogenase 15 (NAD)                                  | Hpgd                 | 1.78±0.96  |
| hydroxysteroid (17-beta) dehydrogenase 10                                    | Hsd17b10             | 22.14±2.26 |
| hydroxysteroid (17-beta) dehydrogenase 11                                    | Hsd17b11             | 5.72±0.95  |
| hydroxysteroid (17-beta) dehydrogenase 12                                    | Hsd17b12             | 2.66±0.68  |
| hydroxysteroid (17-beta) dehydrogenase 4                                     | Hsd17b4              | 5.88±0.29  |
| hydroxysteroid (17-beta) dehydrogenase 8                                     | Hsd17b8              | 4.83±0.6   |
| hydroxysteroid dehydrogenase like 2                                          | Hsd12                | 14.77±3.68 |
| hypermethylated in cancer 2 (predicted)                                      | Hic2_predicted       | 0.4±0.17   |
| hyperpolarization activated cyclic nucleotide-gated potassium channel 2      | Hcn2                 | 1.47±0.19  |
| hypothetical gene supported by NM_172157                                     | LOC497729            | 2.68±0.67  |
| hypothetical LOC100125371                                                    | LOC100125371         | 1.86±0.78  |
| hypothetical LOC287306 (predicted)                                           | RGD1307036_predicted | 1.15±0.16  |
| hypothetical LOC287388 (predicted)                                           | RGD1310324_predicted | 0.55±0.11  |
| hypothetical LOC288978                                                       | LOC288978            | 1.83±0.67  |
| hypothetical LOC290577                                                       | LOC290577            | 2.27±0.35  |
| hypothetical LOC291982 (predicted) /// similar to autoantigen                | LOC361399 /// RGD131 | 1.54±0.08  |
| hypothetical LOC294030                                                       | RGD1305481           | 6.18±0.44  |
| hypothetical LOC298018                                                       | LOC298018            | 0.2±0.09   |
| hypothetical LOC300207 (predicted)                                           | RGD1305928_predicted | 2.22±0.87  |
| hypothetical LOC301124                                                       | LOC301124            | 16.54±1.38 |
| hypothetical LOC302495                                                       | LOC302495            | 0.29±0.23  |
| hypothetical LOC303211                                                       | RGD1311260           | 2.45±0.47  |
| hypothetical LOC304650 (predicted)                                           | RGD1310262_predicted | 0.63±0.42  |
| hypothetical LOC304654 (predicted)                                           | RGD1306072_predicted | 0.39±0.06  |
| hypothetical LOC305452 (predicted)                                           | RGD1309634_predicted | 1.26±0.02  |
| hypothetical LOC306766                                                       | LOC306766            | 6.71±2.7   |
| hypothetical LOC308765 (predicted) /// hypothetical protein LOC685841        | LOC685841 /// RGD131 | 1.9±0.15   |
| hypothetical LOC308869                                                       | MGC72560             | 4.91±1.4   |
| hypothetical LOC311134                                                       | LOC311134            | 0.52±0.16  |
| hypothetical LOC316091                                                       | RGD1304827           | 0.59±0.11  |
| hypothetical LOC316976                                                       | MGC72974             | 1±0.03     |
| hypothetical LOC361153                                                       | LOC361153            | 0.87±0.13  |
| hypothetical LOC362564                                                       | LOC362564            | 1.23±0.13  |
| hypothetical LOC366300                                                       | LOC366300            | 9.15±0.46  |
| hypothetical LOC500532                                                       | LOC500532            | 1.19±0     |
| hypothetical protein Dd25                                                    | Dd25                 | 0.97±0     |
| hypothetical protein LOC100125364                                            | rCG_22919            | 0.91±0.08  |
| hypothetical protein LOC100125365                                            | LOC100125365         | 1.62±0.61  |
| hypothetical protein LOC292764                                               | RGD1303117           | 1.1±0.48   |
| hypothetical protein LOC303332                                               | LOC303332            | 1.37±0.21  |
| hypothetical protein LOC307347                                               | LOC307347            | 4.38±0.64  |
| Hypothetical protein LOC311254                                               | LOC311254            | 1.34±0.09  |
| hypothetical protein LOC361335                                               | LOC361335            | 0.9±0.2    |
| hypothetical protein LOC498606                                               | LOC498606            | 1.26±0.23  |
| hypothetical protein LOC499120                                               | LOC499120            | 2.03±0.12  |
| hypothetical protein LOC499339                                               | LOC499339            | 0.7±0.38   |
| hypothetical protein LOC499602                                               | LOC499602            | 0.45±0.09  |
| hypothetical protein LOC500251                                               | LOC500251            | 1.05±0.24  |
| hypothetical protein LOC500956                                               | LOC500956            | 1.56±0.59  |
| hypothetical protein LOC501546                                               | LOC501546            | 2.88±0.37  |
| hypothetical protein LOC502374                                               | LOC502374            | 8.67±2.26  |
| hypothetical protein LOC595134                                               | LOC595134            | 1.19±0.47  |
| hypothetical protein LOC606294                                               | LOC606294            | 5.61±0.64  |
| Hypothetical protein LOC619558                                               | LOC619558            | 0.72±0.11  |
| hypothetical protein LOC619574                                               | LOC619574            | 1.47±0.23  |
| hypothetical protein LOC654482                                               | LOC654482            | 0.59±0     |
| hypothetical protein LOC678810 /// Purkinje cell protein 4-like 1            | LOC678810 /// Pcp41  | 0.25±0.12  |
| hypothetical protein LOC678970                                               | LOC678970            | 0.22±0.03  |
| hypothetical protein LOC679880                                               | LOC679880            | 6.04±0.19  |
| hypothetical protein LOC680039                                               | LOC680039            | 2.38±0.57  |
| Hypothetical protein LOC680080                                               | LOC680080            | 4.84±1.68  |
| Hypothetical protein LOC680259                                               | LOC680259            | 12.84±0.87 |
| hypothetical protein LOC680262                                               | LOC680262            | 0.49±0.01  |
| Hypothetical protein LOC680422                                               | LOC680422            | 0.57±0     |
| hypothetical protein LOC680687                                               | LOC680687            | 0.45±0.07  |
| Hypothetical protein LOC680817                                               | LOC296884            | 0.51±0.59  |
| hypothetical protein LOC681219                                               | LOC681219            | 17.2±1.26  |
| hypothetical protein LOC681292                                               | LOC681292            | 0.22±0.16  |
| hypothetical protein LOC681367                                               | LOC681367            | 3.22±1.07  |
| hypothetical protein LOC682679                                               | LOC682679            | 3.05±0.47  |
| hypothetical protein LOC682709                                               | LOC682709            | 7.62±0.13  |
| hypothetical protein LOC682888                                               | LOC682888            | 4.86±0.27  |
| hypothetical protein LOC683034                                               | LOC683034            | 1.4±0.23   |
| Hypothetical protein LOC683140                                               | Ak1                  | 5.3±1.34   |
| hypothetical protein LOC683460                                               | LOC683460            | 3.79±2.36  |
| hypothetical protein LOC683948                                               | LOC683948            | 0.37±0.12  |
| hypothetical protein LOC684055                                               | LOC684055            | 3.39±0.23  |
| hypothetical protein LOC684830                                               | LOC684830            | 0.65±0.1   |
| hypothetical protein LOC684993                                               | LOC684993            | 1.92±0.23  |
| hypothetical protein LOC685203                                               | LOC685203            | 0.86±0.1   |
| hypothetical protein LOC685233 /// hypothetical protein LOC688211            | LOC685233 /// LOC688 | 0.98±0.05  |
| hypothetical protein LOC685326                                               | LOC685326            | 0.6±0.21   |
| hypothetical protein LOC685545                                               | LOC685545            | 8.61±1.76  |
| hypothetical protein LOC685548                                               | LOC685548            | 5.01±1.65  |
| hypothetical protein LOC685634                                               | LOC685634            | 1.78±0.24  |

|                                                                                             |                    |            |
|---------------------------------------------------------------------------------------------|--------------------|------------|
| hypothetical protein LOC685888                                                              | LOC685888          | 3.09±0.47  |
| hypothetical protein LOC686179                                                              | MGC125239          | 0.23±0.25  |
| hypothetical protein LOC686506                                                              | LOC686506          | 0.2±0.04   |
| hypothetical protein LOC687090                                                              | LOC687090          | 5.24±0.88  |
| hypothetical protein LOC687361                                                              | LOC687361          | 1.27±0.11  |
| hypothetical protein LOC687408                                                              | LOC687408          | 0.28±0.02  |
| hypothetical protein LOC687693                                                              | LOC687693          | 2.08±1.01  |
| hypothetical protein LOC688211                                                              | LOC688211          | 0.58±0.36  |
| hypothetical protein LOC688257                                                              | LOC688257          | 5.04±0.72  |
| hypothetical protein LOC688300                                                              | LOC688300          | 2.63±0.61  |
| Hypothetical protein LOC688495                                                              | LOC688495          | 6.72±0.96  |
| hypothetical protein LOC688765                                                              | LOC688765          | 0.2±0.01   |
| Hypothetical protein LOC689165                                                              | LOC689165          | 0.73±0.1   |
| hypothetical protein LOC689399                                                              | LOC689399          | 0.42±0.1   |
| hypothetical protein LOC689574                                                              | LOC689574          | 4.77±0.14  |
| hypothetical protein LOC689621                                                              | LOC689621          | 0.41±0.09  |
| hypothetical protein LOC689748                                                              | LOC689748          | 8.85±1.07  |
| hypothetical protein LOC689755                                                              | LOC689755          | 0.32±0.03  |
| hypothetical protein LOC689836                                                              | LOC689836          | 0.4±0.04   |
| hypothetical protein LOC689959                                                              | LOC689959          | 1.83±0.54  |
| hypothetical protein LOC690243                                                              | LOC690243          | 3.41±1.24  |
| hypothetical protein LOC690274                                                              | LOC690274          | 0.69±0.08  |
| hypothetical protein LOC690349                                                              | LOC690349          | 1.99±0.11  |
| hypothetical protein LOC690422                                                              | LOC690422          | 0.37±0.35  |
| hypothetical protein LOC690806                                                              | LOC690806          | 0.53±0.05  |
| hypothetical protein LOC691543                                                              | LOC691543          | 0.73±0.29  |
| hypothetical protein LOC691750                                                              | LOC691750          | 0.89±0.12  |
| hypothetical protein LOC691807                                                              | rCG_28701          | 13.29±1.27 |
| hypothetical protein LOC691849                                                              | LOC691849          | 1.36±0.09  |
| hypothetical protein LOC692032                                                              | LOC692032          | 0.7±0.13   |
| hypothetical protein MGC:15854                                                              | RGD1302996         | 7.4±0.86   |
| hypothetical protein MGC:72616                                                              | RGD735175          | 1.14±0.37  |
| hypothetical RNA binding protein RGD1359713                                                 | RGD1359713         | 12.26±1.38 |
| hypoxanthine guanine phosphoribosyl transferase 1                                           | Hprt1              | 2.83±0.01  |
| hypoxia inducible factor 1, alpha subunit                                                   | Hif1a              | 5.17±1.82  |
| hypoxia up-regulated 1                                                                      | Hyou1              | 2.48±0.01  |
| hypoxia-inducible factor prolyl 4-hydroxylase                                               | Ph-4               | 0.35±0.06  |
| iduronate 2-sulfatase                                                                       | Ids                | 4.86±0.22  |
| IK cytokine /// WD repeat domain 55                                                         | Ik /// Wdr55       | 2.71±0.62  |
| IKAROS family zinc finger 5                                                                 | Ikzf5              | 0.35±0.23  |
| ivb (bacterial acetolactate synthase)-like (predicted)                                      | lvbl_predicted     | 1.5±0.39   |
| immature colon carcinoma transcript 1 (predicted)                                           | lct1_predicted     | 5.73±0.83  |
| immediate early response 2                                                                  | ler2               | 4.11±0.49  |
| immediate early response 5-like                                                             | ler5l              | 1.96±0.29  |
| immunoglobulin (CD79A) binding protein 1                                                    | Igbp1              | 3.94±0.07  |
| immunoglobulin mu binding protein 2                                                         | Ighmbp2            | 0.63±0.29  |
| immunoglobulin superfamily, member 3 (predicted)                                            | Igsf3_predicted    | 0.5±0.03   |
| IMP3, U3 small nucleolar ribonucleoprotein, homolog (yeast) (predicted)                     | Imp3_predicted     | 1.96±0.71  |
| IMP4, U3 small nucleolar ribonucleoprotein, homolog (yeast)                                 | Imp4               | 3.1±0.41   |
| importin 11 (predicted)                                                                     | Ipo11_predicted    | 1.7±0.12   |
| importin 13                                                                                 | Ipo13              | 0.54±0.15  |
| importin 4 (predicted)                                                                      | Ipo4_predicted     | 1.37±0     |
| importin 7 (predicted)                                                                      | Ipo7_predicted     | 3.64±1.03  |
| Importin 9 (predicted)                                                                      | Ipo9_predicted     | 2.12±0.75  |
| influenza virus NS1A binding protein (predicted)                                            | lvns1abp_predicted | 27.39±1.91 |
| ing finger protein 5 pseudogene                                                             | rCG_38334          | 2.63±0.67  |
| Inhibin beta-B                                                                              | Inhbb              | 0.84±0.03  |
| inhibitor of Bruton agammaglobulinemia tyrosine kinase (predicted)                          | Ibtk_predicted     | 0.82±0.33  |
| inhibitor of DNA binding 2                                                                  | Id2                | 3.35±0.2   |
| inhibitor of growth family, member 1                                                        | Inq1               | 2.64±0.02  |
| inhibitor of growth family, member 2                                                        | Inq2               | 1.04±0.22  |
| inhibitor of growth family, member 3                                                        | Inq3               | 1.18±0.37  |
| inhibitor of growth family, member 4                                                        | Inq4               | 0.91±0.07  |
| inhibitor of kappa light polypeptide enhancer in B-cells, kinase complex-associated protein | Ikbkap             | 1.24±0.08  |
| inhibitor of kappaB kinase beta                                                             | Ikbkb              | 1.09±0.1   |
| inner centromere protein (predicted)                                                        | Incenp_predicted   | 0.37±0.23  |
| inner membrane protein, mitochondrial                                                       | Immt               | 25.77±5.07 |
| INO80 complex homolog 1 (S. cerevisiae)                                                     | Inoc1              | 0.45±0.17  |
| inosine 5'-phosphate dehydrogenase 2                                                        | Impdh2             | 2.98±0.77  |
| inosine triphosphatase (nucleoside triphosphate pyrophosphatase)                            | Itpa               | 2.84±0.66  |
| Inositol (myo)-1(or 4)-monophosphatase 1                                                    | Impa1              | 1.65±0.2   |
| inositol (myo)-1(or 4)-monophosphatase 2                                                    | Impa2              | 2.67±0.69  |
| inositol 1,4,5-triphosphate receptor 1                                                      | Itp1               | 6.51±0.16  |
| inositol 1,4,5-triphosphate receptor 3                                                      | Itp3               | 0.73±0.48  |
| inositol 1,4,5-trisphosphate 3-kinase C                                                     | Itpkc              | 0.66±0.04  |
| inositol hexaphosphate kinase 1                                                             | Ihpk1              | 4.08±0.27  |
| inositol hexaphosphate kinase 2                                                             | Ihpk2              | 2.57±0.68  |
| inositol monophosphatase domain containing 1                                                | Impad1             | 1.34±0.07  |
| inositol polyphosphate multikinase                                                          | Ipmk               | 7.89±0.48  |
| inositol polyphosphate phosphatase-like 1                                                   | Inpp11             | 2.57±0.7   |
| inositol polyphosphate-1-phosphatase                                                        | Inpp1              | 2.79±1.14  |
| inositol polyphosphate-4-phosphatase, type 1                                                | Inpp4a             | 0.25±0.06  |
| inositol polyphosphate-5-phosphatase A (predicted)                                          | Inpp5a_predicted   | 0.84±0.36  |
| inositol polyphosphate-5-phosphatase B                                                      | Inpp5b             | 2.59±0.17  |
| insulin degrading enzyme                                                                    | Ide                | 1.23±0.29  |
| insulin induced gene 2                                                                      | Insig2             | 1.58±0.68  |
| insulin receptor substrate 1                                                                | Irs1               | 0.53±0.25  |

|                                                                          |                    |             |
|--------------------------------------------------------------------------|--------------------|-------------|
| insulin receptor substrate 2                                             | Irs2               | 0.65±0.15   |
| insulin-like growth factor 1                                             | Igf1               | 21.57±7.44  |
| insulin-like growth factor 1 receptor                                    | Igf1r              | 4.34±0.76   |
| insulin-like growth factor 2 mRNA binding protein 2                      | Igf2bp2            | 1.16±0.72   |
| insulin-like growth factor 2 receptor                                    | Igf2r              | 1.9±1.32    |
| insulin-like growth factor binding protein 1                             | Igfbp1             | 22.31±15.79 |
| insulin-like growth factor binding protein 5                             | Igfbp5             | 1.88±6.64   |
| insulin-like growth factor binding protein 7                             | Igfbp7             | 50.16±4.61  |
| integral membrane protein 2B                                             | Itm2b              | 64.14±2.37  |
| integral membrane protein 2C                                             | Itm2c              | 29.05±3.05  |
| integrator complex subunit 10                                            | Ints10             | 1.6±0.62    |
| integrator complex subunit 3                                             | Ints3              | 0.67±0.27   |
| integrator complex subunit 4                                             | Ints4              | 4.08±0.85   |
| integrator complex subunit 5 (predicted)                                 | Ints5_predicted    | 0.86±0.3    |
| integrator complex subunit 6                                             | Ints6              | 4.87±0.7    |
| integrator complex subunit 7                                             | Ints7              | 0.72±0.23   |
| integrin alpha 1                                                         | Itga1              | 2.43±0.74   |
| Integrin alpha 3 (predicted)                                             | Itga3_predicted    | 0.66±0.12   |
| integrin alpha FG-GAP repeat containing 1                                | Itfq1              | 4.3±0.44    |
| integrin alpha FG-GAP repeat containing 2                                | Itfq2              | 0.47±0.05   |
| integrin alpha FG-GAP repeat containing 3                                | Itfq3              | 7.29±1.64   |
| integrin alpha V (predicted)                                             | Itgav_predicted    | 0.7±0.01    |
| integrin beta 1 (fibronectin receptor beta)                              | Itgb1              | 13.7±1.47   |
| integrin beta 1 binding protein 1 (predicted)                            | Itgb1bp1_predicted | 1.87±0.09   |
| integrin beta 3 binding protein (beta3-endonexin)                        | Itqb3bp            | 1.75±0.28   |
| integrin beta 4                                                          | Itgb4              | 0.88±0.18   |
| integrin linked kinase                                                   | Ilk                | 5.96±0.19   |
| integrin, alpha E, epithelial-associated                                 | Itgae              | 1.58±0.4    |
| integrin, beta 5                                                         | Itgb5              | 7.65±1.16   |
| integrin, beta 6                                                         | Itgb6              | 2.03±1.76   |
| integrin-linked kinase-associated serine/threonine phosphatase 2C        | Ilkap              | 1.66±0.26   |
| inter-alpha trypsin inhibitor, heavy chain 1 (predicted)                 | Ilih1_predicted    | 1.12±0.01   |
| interferon (alpha and beta) receptor 1 (predicted)                       | Ifnar1_predicted   | 2.24±0.46   |
| interferon gamma induced GTPase                                          | Igtp               | 1.27±0.43   |
| interferon gamma inducible protein 30                                    | Ifi30              | 9.31±1.43   |
| interferon gamma receptor 1                                              | Ifngr1             | 0.61±0.36   |
| interferon gamma receptor 2 (predicted)                                  | Ifngr2_predicted   | 0.76±0.72   |
| interferon induced transmembrane protein 2                               | Iftm2              | 23.94±6.76  |
| interferon regulatory factor 1                                           | Irf1               | 0.67±5.32   |
| interferon regulatory factor 2 binding protein 1 (predicted)             | Irf2bp1_predicted  | 1.45±0.21   |
| interferon regulatory factor 6 (predicted)                               | Irf6_predicted     | 4.48±0.98   |
| interferon regulatory factor 7                                           | Irf7               | 1.17±0.15   |
| interferon regulatory factor 9                                           | Irf9               | 0.88±0.49   |
| interferon stimulated exonuclease gene 20-like 1 (predicted)             | Isg20l1_predicted  | 0.32±0.07   |
| interferon, alpha-inducible protein (clone IFI-15K) (predicted)          | G1p2_predicted     | 1.29±0.31   |
| interferon-induced protein 35                                            | Ifi35              | 1.04±0.04   |
| interferon-induced protein 44                                            | Ifi44              | 0.7±0.4     |
| interferon-related developmental regulator 2 (predicted)                 | Ifrd2_predicted    | 1.11±0.1    |
| interleukin 10 receptor, beta                                            | Il10rb             | 0.49±0.29   |
| interleukin 11 receptor, alpha chain 1                                   | Il11ra1            | 2.65±0.6    |
| interleukin 13 receptor, alpha 1                                         | Il13ra1            | 4.69±0.2    |
| interleukin 15                                                           | Il15               | 0.39±0.13   |
| interleukin 17 receptor A                                                | Il17ra             | 0.64±0.22   |
| interleukin 18 binding protein                                           | Il18bp             | 0.48±0.01   |
| interleukin 6 signal transducer                                          | Il6st              | 2.66±1.75   |
| interleukin 7                                                            | Il7                | 0.58±0.19   |
| interleukin enhancer binding factor 2                                    | Ilf2               | 2.98±1.73   |
| interleukin enhancer binding factor 3                                    | Ilf3               | 0.48±0.4    |
| interleukin-1 receptor-associated kinase 1 (predicted)                   | Irak1_predicted    | 4.69±0.31   |
| interleukin-1 receptor-associated kinase 1 binding protein 1 (predicted) | Irak1bp1_predicted | 1.12±0.12   |
| interleukin-1 receptor-associated kinase 2                               | Irak2              | 1.16±0.12   |
| intersectin 1                                                            | Itns1              | 0.28±0.15   |
| intersectin 2                                                            | Itns2              | 1.21±0.43   |
| intestinal cell kinase                                                   | Ick                | 1.54±0.2    |
| intraflagellar transport 172 homolog (Chlamydomonas)                     | Ift172             | 1.05±0.16   |
| intraflagellar transport 20 homolog (Chlamydomonas)                      | Ift20              | 3.8±0.45    |
| intraflagellar transport 57 homolog (Chlamydomonas) (predicted)          | Ift57_predicted    | 1.4±0.31    |
| intraflagellar transport 74 homolog (Chlamydomonas)                      | Ift74              | 0.54±0.03   |
| intraflagellar transport 80 homolog (Chlamydomonas)                      | Ift80              | 0.29±0.2    |
| intraflagellar transport 81 homolog (Chlamydomonas)                      | Ift81              | 1.11±0.12   |
| intraflagellar transport 88 homolog (Chlamydomonas) (predicted)          | Ift88_predicted    | 0.54±0.14   |
| invasion inhibitory protein 45                                           | Iip45              | 0.63±0.09   |
| inversin                                                                 | Invs               | 0.35±0.07   |
| IQ calmodulin-binding motif containing 1 (predicted)                     | Iqcb1_predicted    | 0.33±0.16   |
| IQ motif and ubiquitin domain containing                                 | Iqub               | 0.82±0.26   |
| IQ motif and WD repeats 1                                                | Iqwd1              | 0.53±0.31   |
| IQ motif containing GTPase activating protein 1 (predicted)              | Iqgap1_predicted   | 2.58±0.19   |
| Iron responsive element binding protein 2                                | Ireb2              | 2.26±0.6    |
| iron-sulfur cluster assembly 1 homolog (S. cerevisiae)                   | Isca1              | 9.7±1.01    |
| Iroquois related homeobox 1 (Drosophila) (predicted)                     | Irx1_predicted     | 9.54±1.16   |
| Iroquois related homeobox 2 (Drosophila)                                 | Irx2               | 3.31±0.34   |
| ischemia related factor NYW-1                                            | Nyw1               | 1.23±0.28   |
| IscU iron-sulfur cluster scaffold homolog (E. coli)                      | Iscu               | 12.51±3.52  |
| isoamyl acetate-hydrolyzing esterase 1 homolog (S. cerevisiae)           | Iah1               | 2.4±0.83    |
| isochorismatase domain containing 1                                      | Isoc1              | 13.89±1.34  |
| isochorismatase domain containing 2b                                     | Isoc2b             | 6.59±1.65   |
| isocitrate dehydrogenase 1 (NADP+), soluble                              | Idh1               | 4.08±0.44   |



|                                                                                       |                   |            |
|---------------------------------------------------------------------------------------|-------------------|------------|
| isocitrate dehydrogenase 2 (NADP+), mitochondrial                                     | ldh2              | 64.58±0.75 |
| isocitrate dehydrogenase 3 (NAD), gamma                                               | ldh3g             | 29.76±1.56 |
| isocitrate dehydrogenase 3 (NAD+) alpha                                               | ldh3a             | 10.96±3.29 |
| isocitrate dehydrogenase 3 (NAD+) beta                                                | ldh3B             | 25.47±4.17 |
| isoleucine-tRNA synthetase (predicted)                                                | lars_predicted    | 1.85±0.71  |
| isoleucine-tRNA synthetase 2, mitochondrial (predicted)                               | lars2_predicted   | 3.43±0.97  |
| isopentenyl-diphosphate delta isomerase                                               | ldi1              | 4.59±3.05  |
| isoprenylcysteine carboxyl methyltransferase                                          | lcmt              | 0.26±0.02  |
| isovaleryl coenzyme A dehydrogenase                                                   | lvd               | 6.6±0.51   |
| ISY1 splicing factor homolog (S. cerevisiae)                                          | lsy1              | 1.71±0.3   |
| IWS1 homolog (S. cerevisiae)                                                          | lws1              | 2.06±0.17  |
| jagunal homolog 1 (Drosophila)                                                        | Jagn1             | 1.43±0.22  |
| Janus kinase 1                                                                        | Jak1              | 10.12±0.01 |
| Janus kinase 2                                                                        | Jak2              | 1.88±0.12  |
| Janus kinase 3                                                                        | Jak3              | 1.72±0.85  |
| Josephin domain containing 1                                                          | Josd1             | 1.87±0.4   |
| Josephin domain containing 2 (predicted)                                              | Josd2_predicted   | 0.61±0.18  |
| Josephin domain containing 3                                                          | Josd3             | 0.57±0.5   |
| JTV1 gene                                                                             | Jtv1              | 2.95±0.3   |
| jumonji domain containing 1A                                                          | Jmjd1a            | 2.25±0.43  |
| jumonji domain containing 1C                                                          | Jmjd1c            | 2.86±1.5   |
| jumonji domain containing 3 (predicted)                                               | Jmjd3_predicted   | 0.84±0.96  |
| jumonji domain containing 5                                                           | Jmjd5             | 0.93±0.05  |
| jumonji domain containing 6                                                           | Jmjd6             | 1.11±0.12  |
| jumonji, AT rich interactive domain 1B (Rbp2 like)                                    | Jarid1b           | 2.04±0.13  |
| jumping translocation breakpoint                                                      | Jtb               | 3.1±0.87   |
| Jun D proto-oncogene                                                                  | Jund              | 10.3±2.7   |
| Jun dimerization protein 2                                                            | Jundm2            | 0.52±0.28  |
| Jun dimerization protein 2                                                            | Jundp2            | 2.5±0.12   |
| Jun oncogene                                                                          | Jun               | 11.81±0.04 |
| Jun-B oncogene                                                                        | Junb              | 3.53±1.44  |
| junction plakoglobin                                                                  | Jup               | 3.56±1.23  |
| kalirin, RhoGEF kinase                                                                | Kalrn             | 0.24±0.01  |
| kaptin                                                                                | Kptn              | 1.58±0.15  |
| Karyopherin (importin) alpha 1                                                        | Kpna1             | 1.8±0.02   |
| karyopherin (importin) alpha 2                                                        | Kpna2             | 2.54±0.62  |
| Karyopherin (importin) alpha 3                                                        | Kpna3             | 2.04±0.02  |
| karyopherin (importin) alpha 6                                                        | Kpna6             | 0.49±0.14  |
| karyopherin (importin) beta 1                                                         | Kpnb1             | 0.45±0.04  |
| katanin p60 (ATPase-containing) subunit A1                                            | Katna1            | 1.03±0.24  |
| katanin p80 (WD40-containing) subunit B 1                                             | Katnb1            | 0.88±0.1   |
| KDEL (Lys-Asp-Glu-Leu) containing 1                                                   | Kdelc1            | 0.53±0.21  |
| KDEL (Lys-Asp-Glu-Leu) endoplasmic reticulum protein retention receptor 1             | Kdelr1            | 8.97±0.16  |
| KDEL (Lys-Asp-Glu-Leu) endoplasmic reticulum protein retention receptor 2             | Kdelr2            | 6.47±0.21  |
| KDEL (Lys-Asp-Glu-Leu) endoplasmic reticulum protein retention receptor 3 (predicted) | Kdelr3_predicted  | 16.31±2.64 |
| kelch domain containing 1 (predicted)                                                 | Klhdc1_predicted  | 0.58±0.09  |
| kelch domain containing 2                                                             | Klhdc2            | 4.8±0.09   |
| kelch domain containing 3                                                             | Klhdc3            | 2.7±0.34   |
| kelch domain containing 5                                                             | Klhdc5            | 0.56±0.12  |
| kelch domain containing 8A                                                            | Klhdc8a           | 7.63±1.61  |
| kelch repeat and BTB (POZ) domain containing 2 (predicted)                            | Kbtbd2_predicted  | 1.74±0.26  |
| kelch repeat and BTB (POZ) domain containing 3 (predicted)                            | Kbtbd3_predicted  | 0.54±0.2   |
| kelch repeat and BTB (POZ) domain containing 4 (predicted)                            | Kbtbd4_predicted  | 1.07±0.35  |
| kelch-like 14 (Drosophila)                                                            | Klh14             | 1.32±0.26  |
| kelch-like 2, Mayven (Drosophila) (predicted)                                         | Klh12_predicted   | 0.51±0.15  |
| kelch-like 21 (Drosophila) (predicted)                                                | Klh121_predicted  | 0.69±0     |
| kelch-like 22 (Drosophila) (predicted)                                                | Klh122_predicted  | 0.4±0.14   |
| kelch-like 23 (Drosophila) (predicted)                                                | Klh123_predicted  | 0.71±0.19  |
| kelch-like 24 (Drosophila)                                                            | Klh124            | 2.97±2.41  |
| kelch-like 25 (Drosophila)                                                            | Klh125            | 0.32±0.08  |
| kelch-like 26 (Drosophila) (predicted)                                                | Klh126_predicted  | 0.52±0.16  |
| kelch-like 30 (Drosophila)                                                            | Klh130            | 0.38±0.14  |
| kelch-like 5 (Drosophila)                                                             | Klh15             | 0.76±0.04  |
| kelch-like 7 (Drosophila)                                                             | Klh17             | 5.82±1.93  |
| kelch-like 8 (Drosophila) (predicted)                                                 | Klh18_predicted   | 0.4±0.03   |
| kelch-like 9 (Drosophila) (predicted)                                                 | Klh19_predicted   | 7.77±2.19  |
| Kelch-like ECH-associated protein 1                                                   | Keap1             | 1.36±0.2   |
| keratin 10                                                                            | Krt10             | 1.31±0.12  |
| keratin 19                                                                            | Krt19             | 0.91±0.87  |
| keratin 7                                                                             | Krt7              | 15.31±0.46 |
| keratin 8                                                                             | Krt8              | 1.02±1.79  |
| keratinocyte associated protein 2 (predicted)                                         | Krtcap2_predicted | 6.98±0.87  |
| KH domain containing, RNA binding, signal transduction associated 1                   | Khdrbs1           | 5.41±0.08  |
| KH domain containing, RNA binding, signal transduction associated 3                   | Khdrbs3           | 1.27±0.06  |
| KH-type splicing regulatory protein                                                   | Khsrp             | 5.41±0.61  |
| kidney predominant protein NCU-G1                                                     | RGD1303130        | 4.13±0.24  |
| kin of IRRE like 3 (Drosophila) (predicted)                                           | Kirrel3_predicted | 0.66±0.06  |
| kinase D-interacting substrate of 220 kDa                                             | Kidins220         | 7.58±0.52  |
| kinectin 1 (predicted)                                                                | Ktn1_predicted    | 2.67±0.46  |
| kinesin family member 11                                                              | Kif11             | 0.43±0.07  |
| kinesin family member 12                                                              | Kif12             | 0.68±0     |
| kinesin family member 13A (predicted)                                                 | Kif13a_predicted  | 0.79±0.13  |
| kinesin family member 15                                                              | Kif15             | 0.51±0.04  |
| kinesin family member 16B (predicted)                                                 | Kif16b_predicted  | 0.5±0.11   |
| kinesin family member 20A (predicted)                                                 | Kif20a_predicted  | 0.51±0.14  |
| kinesin family member 21A (predicted)                                                 | Kif21a_predicted  | 1.38±0.04  |
| kinesin family member 22                                                              | Kif22             | 0.58±0.07  |

|                                                                                   |                         |            |
|-----------------------------------------------------------------------------------|-------------------------|------------|
| kinesin family member 23 (predicted)                                              | Kif23_predicted         | 0.33±0.08  |
| kinesin family member 2A                                                          | Kif2a                   | 1.1±0.16   |
| kinesin family member 3a                                                          | Kif3a                   | 0.36±0.16  |
| kinesin family member 3B (predicted)                                              | Kif3b_predicted         | 1.64±0.14  |
| kinesin family member 3C                                                          | Kif3c                   | 0.71±0.27  |
| kinesin family member 5B                                                          | Kif5b                   | 0.46±0.18  |
| kinesin family member C3                                                          | Kifc3                   | 4.93±1.52  |
| Kinesin heavy chain family, member 2                                              | Kif2                    | 0.86±0.16  |
| kinesin light chain 1                                                             | Klc1                    | 1.9±0.68   |
| kinesin light chain 2 (predicted)                                                 | Klc2_predicted          | 2.07±0.18  |
| kinesin light chain 4                                                             | Klc4                    | 3.81±0.29  |
| kinesin-associated protein 3 (predicted)                                          | Kifap3_predicted        | 3.67±0.25  |
| kinetochore associated 1 (predicted)                                              | Kntc1_predicted         | 0.45±0.14  |
| Klotho                                                                            | Kl                      | 0.41±0.23  |
| KRAB-A domain containing 1                                                        | Krba1                   | 0.59±0.29  |
| KRIT1, ankyrin repeat containing (predicted)                                      | Krit1_predicted         | 1.11±0.15  |
| Kruppel-like factor 10                                                            | Klf10                   | 3.55±0.8   |
| Kruppel-like factor 13                                                            | Klf13                   | 0.68±0.22  |
| Kruppel-like factor 15                                                            | Klf15                   | 6.2±1.4    |
| Kruppel-like factor 2 (lung) (predicted)                                          | Klf2_predicted          | 0.59±0.41  |
| Kruppel-like factor 3 (basic)                                                     | Klf3                    | 0.87±0.62  |
| Kruppel-like factor 4 (gut)                                                       | Klf4                    | 0.2±1.24   |
| Kruppel-like factor 6                                                             | Klf6                    | 1.6±3.5    |
| Kruppel-like factor 9                                                             | Klf9                    | 10.21±5.14 |
| KTEL (Lys-Tyr-Glu-Leu) containing 1                                               | Ktelc1                  | 1.63±0.28  |
| KTI12 homolog, chromatin associated (S. cerevisiae)                               | Kti12                   | 1.56±0.05  |
| Kv channel interacting protein 4                                                  | Kcnip4                  | 0.44±0.03  |
| kynurenine aminotransferase III                                                   | Kat3                    | 3.27±0.24  |
| L antigen family, member 3                                                        | Lage3                   | 5.92±0.15  |
| l(3)mbt-like 2 (Drosophila)                                                       | L3mbt2                  | 0.84±0.1   |
| l(3)mbt-like 3 (Drosophila) (predicted)                                           | L3mbt3_predicted        | 0.21±0.14  |
| L1 cell adhesion molecule                                                         | L1cam                   | 0.39±1     |
| L-2-hydroxyglutarate dehydrogenase (predicted)                                    | L2hgdh_predicted        | 1.14±0.1   |
| La ribonucleoprotein domain family, member 1 (predicted)                          | Larp1_predicted         | 5.8±0.53   |
| La ribonucleoprotein domain family, member 5 (predicted)                          | Larp5_predicted         | 4.92±0.58  |
| lactamase, beta (predicted)                                                       | Lactb_predicted         | 0.53±0.2   |
| Lactamase, beta 2                                                                 | Lactb2                  | 3.77±0.48  |
| lactate dehydrogenase A                                                           | Ldha                    | 6.87±4.08  |
| lactate dehydrogenase B                                                           | Ldhb                    | 59.29±2    |
| lactate dehydrogenase D                                                           | Ldhd                    | 1.75±0.16  |
| lactation elevated 1                                                              | Lace1                   | 1.84±0.81  |
| ladinin (predicted)                                                               | Lad1_predicted          | 3.1±0.32   |
| LAG1 homolog, ceramide synthase 1 /// growth differentiation factor 1 (predicted) | Gdf1_predicted /// Lass | 5.43±0.16  |
| LAG1 homolog, ceramide synthase 4                                                 | Lass4                   | 0.22±0.1   |
| LAG1 homolog, ceramide synthase 5                                                 | Lass5                   | 1.36±0.28  |
| lamin B receptor                                                                  | Lbr                     | 0.3±0.08   |
| Lamin B1                                                                          | Lmnb1                   | 1.63±0.16  |
| laminin, alpha 1                                                                  | Lama1                   | 1.2±0.14   |
| laminin, alpha 5                                                                  | Lama5                   | 1.01±1.26  |
| laminin, beta 1                                                                   | Lamb1                   | 8.04±0.32  |
| laminin, beta 2                                                                   | Lamb2                   | 7.58±2.9   |
| laminin, gamma 1                                                                  | Lamc1                   | 0.32±0.46  |
| lanC (bacterial lantibiotic synthetase component C)-like 1                        | Lancl1                  | 3.76±1.27  |
| lanC (bacterial lantibiotic synthetase component C)-like 2 (predicted)            | Lancl2_predicted        | 1.3±0.76   |
| Lanosterol synthase                                                               | Lss                     | 1.24±0.46  |
| large subunit GTPase 1 homolog (S. cerevisiae)                                    | Lsg1                    | 0.46±0.05  |
| large subunit ribosomal protein L36a                                              | LOC685642 /// LOC687    | 11.05±0.66 |
| large subunit ribosomal protein L36a                                              | LOC687717 /// LOC691    | 12.64±2.72 |
| large tumor suppressor 2 (predicted)                                              | Lats2_predicted         | 4.94±2.29  |
| LAS1-like (S. cerevisiae) (predicted)                                             | Las1_predicted          | 0.78±0.06  |
| latent transforming growth factor beta binding protein 3                          | Ltbp3                   | 1.82±0.02  |
| latrophilin 2                                                                     | Lphn2                   | 3.33±0.59  |
| LEA_4 domain containing protein RGD1359600                                        | RGD1359600              | 4.56±1.21  |
| lectin, galactose binding, soluble 1                                              | Lgals1                  | 3.44±1.18  |
| lectin, galactose binding, soluble 8                                              | Lgals8                  | 2.21±0.02  |
| lectin, mannose-binding 2 (predicted)                                             | Lman2_predicted         | 3.66±0.48  |
| Lectin, mannose-binding 2-like (predicted)                                        | Lman2l_predicted        | 3.07±0.4   |
| lectin, mannose-binding, 1                                                        | Lman1                   | 0.94±0.11  |
| LEM domain containing 2                                                           | Lemd2                   | 0.62±0.01  |
| LEM domain containing 3                                                           | Lemd3                   | 0.96±0.14  |
| Leo1, Paf1/RNA polymerase II complex component, homolog (S. cerevisiae)           | Leo1                    | 0.83±0.29  |
| leprecan 1                                                                        | Lepre1                  | 0.89±0.2   |
| leprecan-like 2 (predicted)                                                       | Leprel2_predicted       | 0.98±0.37  |
| leptin receptor overlapping transcript                                            | Leprot                  | 4.44±0.34  |
| leptin receptor overlapping transcript-like 1                                     | Leprotl1                | 1.59±0.53  |
| lethal giant larvae homolog 1 (Drosophila)                                        | Llgl1                   | 0.58±0.22  |
| leucine aminopeptidase 3                                                          | Lap3                    | 1.19±0.48  |
| leucine carboxyl methyltransferase 1                                              | Lcmt1                   | 2.71±0.22  |
| leucine rich repeat (in FLII) interacting protein 1                               | Lrrfip1                 | 0.58±0.37  |
| leucine rich repeat (in FLII) interacting protein 2                               | Lrrfip2                 | 0.97±0.13  |
| leucine rich repeat and sterile alpha motif containing 1                          | Lrsam1                  | 0.57±0.09  |
| leucine rich repeat containing 14                                                 | Lrrc14                  | 1.37±0.35  |
| leucine rich repeat containing 16                                                 | Lrrc16                  | 2.46±0.47  |
| leucine rich repeat containing 28 (predicted)                                     | Lrrc28_predicted        | 0.46±0.09  |
| leucine rich repeat containing 40                                                 | Lrrc40                  | 1.77±0.37  |
| leucine rich repeat containing 41                                                 | Lrrc41                  | 1.37±0.33  |
| leucine rich repeat containing 42                                                 | Lrrc42                  | 1.16±0.39  |

|                                                                           |                     |            |
|---------------------------------------------------------------------------|---------------------|------------|
| leucine rich repeat containing 48                                         | Lrrc48              | 0.32±0.04  |
| leucine rich repeat containing 57                                         | Lrrc57              | 0.94±0.11  |
| leucine rich repeat containing 59                                         | Lrrc59              | 3.8±0.53   |
| leucine rich repeat containing 61                                         | Lrrc61              | 0.43±0.15  |
| leucine rich repeat containing 8 family, member B                         | Lrrc8b              | 1.01±0.37  |
| leucine rich repeat containing 8 family, member E                         | Lrrc8e              | 0.59±0.23  |
| leucine rich repeat containing 8A                                         | Lrrc8a              | 0.48±0.36  |
| leucine rich repeat containing 8D                                         | Lrrc8d              | 2.57±1.48  |
| leucine zipper and CTNNBIP1 domain containing                             | Lzic                | 0.67±0.04  |
| leucine zipper protein 1                                                  | Luzp1               | 1.24±0.39  |
| leucine zipper transcription factor-like 1                                | Lztlf1              | 1.35±0.17  |
| leucine zipper, putative tumor suppressor 2                               | Lzts2               | 1.45±0.18  |
| leucine zipper-EF-hand containing transmembrane protein 1                 | Letm1               | 2.92±1.25  |
| leucine-rich PPR-motif containing                                         | Lrpprc              | 7.5±2.13   |
| leucine-rich repeat kinase 1 (predicted)                                  | Lrrk1_predicted     | 0.89±0.18  |
| leucine-rich repeat-containing G protein-coupled receptor 4               | Lqr4                | 2.13±0.8   |
| leucine-rich repeats and calponin homology (CH) domain containing 1       | Lrch1               | 0.34±0.12  |
| leucine-rich repeats and immunoglobulin-like domains 3                    | Lrig3               | 0.36±0.14  |
| leucine-rich repeats and transmembrane domains 2                          | Lrtm2               | 0.6±0.2    |
| leucine-zipper-like transcriptional regulator, 1 (predicted)              | Lztr1_predicted     | 1.26±0.18  |
| leucyl-tRNA synthetase                                                    | Lars                | 1.63±0.16  |
| leukemia inhibitory factor receptor                                       | Lifr                | 0.52±0.06  |
| leukocyte receptor cluster (LRC) member 1 (predicted)                     | Leng1_predicted     | 0.33±0.23  |
| leukocyte receptor cluster (LRC) member 4 (predicted)                     | Leng4_predicted     | 2.19±0.09  |
| leukocyte receptor cluster (LRC) member 8                                 | Leng8               | 0.25±0.25  |
| leukotriene A4 hydrolase                                                  | Lta4h               | 4.59±1.5   |
| leukotriene B4 12-hydroxydehydrogenase                                    | Ltb4dh              | 1.79±0.25  |
| leupaxin                                                                  | Lpxn                | 0.25±0.11  |
| ligand of numb-protein X 1 (predicted)                                    | Ln timer_predicted  | 1.45±0.3   |
| ligand of numb-protein X 2 (predicted)                                    | Ln timer_predicted  | 0.79±0     |
| ligase I, DNA, ATP-dependent                                              | Lig1                | 1.24±0.28  |
| ligase III, DNA, ATP-dependent                                            | Lig3                | 0.2±0.2    |
| LIM and SH3 protein 1                                                     | Lasp1               | 5.68±2.88  |
| LIM domain binding 1 (predicted)                                          | Ldb1_predicted      | 3.22±0.64  |
| LIM domain binding 3                                                      | Ldb3                | 0.21±0.03  |
| LIM domain only 4                                                         | Lmo4                | 4.96±1.01  |
| LIM domain only 7                                                         | Lmo7                | 7.62±0.07  |
| LIM domain only protein 7                                                 | LMO7                | 15.23±1.34 |
| LIM domains containing 1 (predicted)                                      | Limd1_predicted     | 2.03±0.26  |
| LIM motif-containing protein kinase 2                                     | Limk2               | 1.12±0.71  |
| limb region 1-like homolog (mouse)                                        | Lmbr1l              | 0.23±0.2   |
| limkain b1                                                                | Lkap                | 2.39±0.27  |
| lin-37 homolog (C. elegans)                                               | Lin37               | 1.65±0.55  |
| lipase maturation factor 1                                                | Lmf1                | 0.67±0.21  |
| lipase, endothelial                                                       | Lipg                | 1.55±0.27  |
| lipin 3                                                                   | Lpin3               | 0.84±0.14  |
| lipoic acid synthetase                                                    | Lias                | 6.74±1.11  |
| lipolysis stimulated lipoprotein receptor                                 | Lsr                 | 2.56±1.08  |
| lipoma HMGIC fusion partner-like 2 (predicted)                            | Lhfp12_predicted    | 1.08±0.28  |
| lipoprotein lipase                                                        | Lpl                 | 0.48±2.84  |
| LMBR1 domain containing 1                                                 | Lmbrd1              | 10.54±1.22 |
| LOC360664 (predicted)                                                     | RGD1311078_predicte | 0.88±0.24  |
| LOC360807                                                                 | LOC360807           | 5.19±0.98  |
| LOC361485 /// similar to chromosome 6 open reading frame 70 (predicted)   | RGD1309374 /// RGD1 | 2.1±0.08   |
| LOC361614 (predicted)                                                     | RGD1308929_predicte | 2.28±0.22  |
| LOC361719 (predicted)                                                     | RGD1308106_predicte | 0.42±0.11  |
| LOC361774 (predicted)                                                     | RGD1306116_predicte | 1.69±0.14  |
| LOC362424 (predicted)                                                     | RGD1308850_predicte | 3.08±0.74  |
| LOC362678 (predicted)                                                     | RGD1308923_predicte | 0.81±0.09  |
| LOC363015 (predicted)                                                     | RGD1310444_predicte | 2.27±0.61  |
| LOC363020 (predicted)                                                     | RGD1309410_predicte | 1.71±0.14  |
| LOC500651                                                                 | MGC112883           | 3.56±0     |
| lon peptidase 1, mitochondrial                                            | Lonp1               | 5.7±1.16   |
| lon peptidase 2, peroxisomal                                              | Lonp2               | 4.8±1.03   |
| Longevity assurance homolog 2 (S. cerevisiae)                             | Lass2               | 7.64±2.08  |
| low density lipoprotein receptor-related protein 11 (predicted)           | Lrp11_predicted     | 1.49±0.17  |
| low density lipoprotein receptor-related protein 5 (predicted)            | Lrp5_predicted      | 2.46±0.27  |
| low density lipoprotein receptor-related protein 6 (predicted)            | Lrp6_predicted      | 0.97±0.43  |
| low density lipoprotein receptor-related protein associated protein 1     | Lrpap1              | 2.13±0.41  |
| low density lipoprotein-related protein 12 (predicted)                    | Lrp12_predicted     | 0.49±0.17  |
| low-density lipoprotein receptor-related protein 10                       | Lrp10               | 9.85±3.48  |
| LPS-induced TN factor                                                     | Litaf               | 13.91±1.51 |
| LPS-responsive beige-like anchor (predicted)                              | Lrba_predicted      | 6.43±1.43  |
| LRRTG00141                                                                | LOC499235           | 8.01±0.41  |
| LSM domain containing 1                                                   | Lsmd1               | 10.12±0.63 |
| LSM1 homolog, U6 small nuclear RNA associated (S. cerevisiae) (predicted) | Lsm1_predicted      | 1.85±1     |
| LSM12 homolog (S. cerevisiae)                                             | Lsm12               | 4.3±0.78   |
| LSM14 homolog A (SCD6, S. cerevisiae) (predicted)                         | Lsm14a_predicted    | 6.79±0.2   |
| LSM3 homolog, U6 small nuclear RNA associated (S. cerevisiae) (predicted) | Lsm3_predicted      | 3.98±0.34  |
| LSM4 homolog, U6 small nuclear RNA associated (S. cerevisiae) (predicted) | Lsm4_predicted      | 1.85±0.33  |
| LSM5 homolog, U6 small nuclear RNA associated (S. cerevisiae) (predicted) | Lsm5_predicted      | 2.53±0.74  |
| LSM6 homolog, U6 small nuclear RNA associated (S. cerevisiae)             | Lsm6                | 6.68±0.34  |
| LSM7 homolog, U6 small nuclear RNA associated (S. cerevisiae) (predicted) | Lsm7_predicted      | 1.1±0.07   |
| LSM8 homolog, U6 small nuclear RNA associated (S. cerevisiae) (predicted) | Lsm8_predicted      | 1.15±0.15  |
| LTV1 homolog (S. cerevisiae)                                              | Ltv1                | 1.47±0.27  |
| LUC7-like (S. cerevisiae)                                                 | Luc7l               | 1.11±0.2   |
| LUC7-like 2 (S. cerevisiae) (predicted)                                   | Luc7l2_predicted    | 4.17±0.61  |

|                                                                        |                      |            |
|------------------------------------------------------------------------|----------------------|------------|
| luteinizing hormone beta                                               | Lhb                  | 0.52±0.2   |
| Ly1 antibody reactive clone                                            | Lyar                 | 0.56±0.12  |
| Ly6/neurotoxin 1 (predicted)                                           | Lynx1_predicted      | 1.16±0.19  |
| Ly6/Plaur domain containing 3                                          | Lypd3                | 0.26±0.09  |
| Ly6-C antigen                                                          | LOC300024 / Ly6a_pre | 1.07±0.53  |
| lymphocyte antigen 6 complex, locus B                                  | Ly6b                 | 6.46±3.57  |
| lymphotoxin B receptor                                                 | Ltbr                 | 3.63±0.19  |
| LYR motif containing 1                                                 | Lyrm1                | 0.42±0.29  |
| lysine-rich coiled-coil 1                                              | Krcc1                | 4.74±1.1   |
| LysM, putative peptidoglycan-binding, domain containing 1              | Lysmd1               | 0.67±0.25  |
| LysM, putative peptidoglycan-binding, domain containing 3              | Lysmd3               | 1.46±0.17  |
| lysophosphatidylcholine acyltransferase 1                              | Lpcat1               | 0.41±0.19  |
| lysophospholipase 1                                                    | Lypla1               | 4.81±0.59  |
| lysophospholipase 2                                                    | Lypla2               | 1.6±0.18   |
| lysophospholipase 3                                                    | Lypla3               | 0.77±0     |
| lysophospholipase-like 1 (predicted)                                   | Lyplal1_predicted    | 3.04±0.81  |
| lysosomal acid lipase A                                                | Lipa                 | 2.23±0.35  |
| lysosomal membrane glycoprotein 1                                      | Lamp1                | 5.09±1.2   |
| lysosomal membrane glycoprotein 2                                      | Lamp2                | 12.28±0    |
| lysosomal-associated protein transmembrane 4A                          | Laptm4a              | 21.14±3.36 |
| lysosomal-associated protein transmembrane 4B                          | Laptm4b              | 6.11±1     |
| lysosomal-associated protein transmembrane 5                           | Laptm5               | 0.8±0.26   |
| lysyl-tRNA synthetase                                                  | Kars                 | 6.01±1.3   |
| MACRO domain containing 1                                              | Macrod1              | 1.98±0.08  |
| macrophage erythroblast attacher                                       | Maea                 | 7.72±0.22  |
| macrophage migration inhibitory factor                                 | Mif                  | 14.21±2.09 |
| MAD homolog 1 (Drosophila)                                             | Smad1                | 4.01±0.83  |
| MAD homolog 2 (Drosophila)                                             | Smad2                | 1.25±0.2   |
| MAD homolog 4 (Drosophila)                                             | Smad4                | 3.65±0.86  |
| MAD homolog 5 (Drosophila)                                             | Smad5                | 0.35±0.3   |
| MAD homolog 6 (Drosophila) (predicted)                                 | Smad6_predicted      | 0.51±0.02  |
| MAD homolog 7 (Drosophila)                                             | Smad7                | 1.26±0.42  |
| MAD2 (mitotic arrest deficient, homolog)-like 1 (yeast) (predicted)    | Mad2l1_predicted     | 0.32±0.11  |
| MAD2 mitotic arrest deficient-like 2 (yeast)                           | Mad2l2               | 0.47±0.1   |
| MAD2L1 binding protein                                                 | Mad2l1bp             | 0.78±0.31  |
| MAF1 homolog (S. cerevisiae)                                           | Maf1                 | 3.99±0.75  |
| MAGI family member, X-linked                                           | Magix                | 1.16±0.2   |
| magnesium transporter 1                                                | Magt1                | 2.53±0.26  |
| magnesium-dependent phosphatase 1                                      | Mdp1                 | 0.92±0.22  |
| mago-nashi homolog, proliferation-associated (Drosophila) (predicted)  | Magoh_predicted      | 4.2±1.34   |
| major facilitator superfamily domain containing 1 (predicted)          | Mfsd1_predicted      | 1.71±0.65  |
| major facilitator superfamily domain containing 3                      | Mfsd3                | 0.6±0.12   |
| major facilitator superfamily domain containing 9                      | Mfsd9                | 1±0.12     |
| major histocompatibility complex, class II, DM alpha                   | Hla-dma              | 0.9±0.59   |
| major histocompatibility complex, class II, DM beta                    | Hla-dmb              | 7.54±0.08  |
| major vault protein                                                    | Mvp                  | 3.27±1.02  |
| MAK10 homolog, amino-acid N-acetyltransferase subunit, (S. cerevisiae) | Mak10                | 2.95±0.1   |
| makorin, ring finger protein, 2                                        | Mkrm2                | 1.75±0.12  |
| mal, T-cell differentiation protein 2                                  | Mal2                 | 11.26±5.85 |
| malate dehydrogenase 1, NAD (soluble)                                  | Mdh1                 | 44.06±3.97 |
| malate dehydrogenase 2, NAD (mitochondrial)                            | Mdh2                 | 20.82±3.54 |
| male-enhanced antigen 1                                                | Mea1                 | 11.39±5.2  |
| male-specific lethal 2-like 1 (Drosophila) (predicted)                 | Msl2l1_predicted     | 1.94±0.46  |
| male-specific lethal-3 homolog 1 (Drosophila)                          | Msl3l1               | 3.98±0.48  |
| malic enzyme 2, NAD(+)-dependent, mitochondrial (predicted)            | Me2_predicted        | 1.72±0     |
| malic enzyme 3, NADP(+)-dependent, mitochondrial (predicted)           | Me3_predicted        | 3.94±0.71  |
| malignant fibrous histiocytoma amplified sequence 1 (predicted)        | Mfhas1_predicted     | 0.79±0.16  |
| malignant T cell amplified sequence 1                                  | Mcts1                | 5.11±1.13  |
| malignant T cell amplified sequence 2                                  | Mcts2                | 1.95±0.6   |
| malonyl-CoA decarboxylase                                              | Mlycd                | 2.18±0.15  |
| MAM domain containing 2                                                | Mamdc2               | 0.59±0.02  |
| mammary tumor virus receptor 2                                         | Mtvr2                | 3.72±0.41  |
| mannose phosphate isomerase (mapped)                                   | Mpi                  | 3.11±1.17  |
| mannose-6-phosphate protein p76                                        | P76                  | 3.72±0.39  |
| mannose-6-phosphate receptor binding protein 1                         | M6prbp1              | 10.18±3.02 |
| mannose-6-phosphate receptor, cation dependent                         | M6pr                 | 6.04±0.37  |
| mannose-P-dolichol utilization defect 1                                | Mpdu1                | 2.04±0.51  |
| mannosidase 2, alpha 1                                                 | Man2a1               | 0.45±0.23  |
| Mannosidase 2, alpha 2 (predicted)                                     | Man2a2_predicted     | 0.45±0.13  |
| mannosidase 2, alpha B1                                                | Man2b1               | 2.76±0.46  |
| mannosidase, alpha, class 1A, member 2 (predicted)                     | Man1a2_predicted     | 0.28±0.15  |
| mannosidase, alpha, class 1B, member 1                                 | Man1b1               | 2.69±0.44  |
| mannosidase, alpha, class 1C, member 1 (predicted)                     | Man1c1_predicted     | 4.04±0.89  |
| mannosidase, alpha, class 2C, member 1                                 | Man2c1               | 2.52±0.14  |
| mannosidase, beta A, lysosomal                                         | Manba                | 3.31±0.73  |
| mannosidase, beta A, lysosomal-like                                    | Manbal               | 2.73±0.43  |
| mannoside acetylglucosaminyltransferase 1                              | Mgat1                | 0.49±0.28  |
| mannoside acetylglucosaminyltransferase 2                              | Mgat2                | 1.78±1.37  |
| mannoside acetylglucosaminyltransferase 4, isoenzyme B                 | Mgat4b               | 1.96±0.03  |
| MANSC domain containing 1                                              | Mansc1               | 0.82±0.2   |
| MAP kinase-activated protein kinase 2                                  | Mapkapk2             | 2.16±1.41  |
| MAP kinase-activated protein kinase 5                                  | Mapkapk5             | 1.02±0.22  |
| MAP kinase-interacting serine/threonine kinase 1                       | Mknk1                | 0.52±0.11  |
| MAP kinase-interacting serine/threonine kinase 2                       | Mknk2                | 3.96±0.61  |
| MAP/microtubule affinity-regulating kinase 2                           | Mark2                | 1.72±0     |
| MAP/microtubule affinity-regulating kinase 3                           | Mark3                | 2.79±1.17  |
| MAP3K12 binding inhibitory protein 1 (predicted)                       | Mbip_predicted       | 0.29±0.08  |

|                                                                                               |                        |             |
|-----------------------------------------------------------------------------------------------|------------------------|-------------|
| MAP-kinase activating death domain                                                            | Madd                   | 0.67±0.07   |
| mastermind like 1 ( <i>Drosophila</i> ) (predicted)                                           | Maml1_predicted        | 0.67±0.09   |
| maternal embryonic leucine zipper kinase (predicted)                                          | Melk_predicted         | 0.34±0.28   |
| maternal G10 transcript                                                                       | G10                    | 3.32±0.16   |
| matrilin 1, cartilage matrix protein                                                          | Matn1                  | 2.89±0      |
| matrin 3                                                                                      | Matr3                  | 12.36±0.7   |
| matrix metalloproteinase 14 (membrane-inserted)                                               | Mmp14                  | 4.96±0.87   |
| matrix metalloproteinase 15 (predicted)                                                       | Mmp15_predicted        | 3.59±0.28   |
| max binding protein (predicted)                                                               | Mnt_predicted          | 1.36±0.21   |
| Max dimerization protein 4 (predicted)                                                        | Mxd4_predicted         | 1.88±1.01   |
| Max interacting protein 1                                                                     | Mxi1                   | 15.96±4.18  |
| Max protein                                                                                   | Max                    | 3.72±0.55   |
| MAX-like protein X                                                                            | Mlx                    | 2.63±0.53   |
| MBD2-interacting zinc finger (predicted)                                                      | Mizf_predicted         | 0.68±0.21   |
| MCF.2 cell line derived transforming sequence-like                                            | Mcf2l                  | 0.27±0.22   |
| McKusick-Kaufman syndrome protein                                                             | Mkks                   | 5.81±0.11   |
| Meckel syndrome, type 1                                                                       | Mks1                   | 0.27±0.02   |
| mediator complex subunit 1                                                                    | Med1                   | 1.4±0       |
| mediator complex subunit 13-like                                                              | Med13l                 | 2.33±0.29   |
| mediator complex subunit 14                                                                   | Med14                  | 3.32±1.1    |
| mediator complex subunit 15                                                                   | Med15                  | 1.28±0.31   |
| mediator complex subunit 16                                                                   | Med16                  | 2.39±0.25   |
| mediator complex subunit 17                                                                   | Med17                  | 0.75±0.16   |
| mediator complex subunit 20 /// similar to ubiquitin specific protease 49 (predicted)         | LOC501098 /// Med20    | 1.95±0.46   |
| mediator complex subunit 21                                                                   | Med21                  | 1.62±0.06   |
| mediator complex subunit 22                                                                   | Med22                  | 1.21±0.41   |
| mediator complex subunit 23                                                                   | Med23                  | 2.46±0.53   |
| mediator complex subunit 24                                                                   | Med24                  | 2.37±0.38   |
| mediator complex subunit 27                                                                   | Med27                  | 0.85±0.1    |
| mediator complex subunit 29                                                                   | Med29                  | 2.29±0.34   |
| mediator complex subunit 30 (predicted)                                                       | Med30_predicted        | 1.79±0.69   |
| mediator of cell motility 1                                                                   | Memo1                  | 2.39±0.58   |
| mediator of DNA damage checkpoint 1                                                           | Mdc1                   | 0.95±0.45   |
| mediator of RNA polymerase II transcription, subunit 10 homolog (NUT2, <i>S. cerevisiae</i> ) | Med10                  | 1.64±0.36   |
| mediator of RNA polymerase II transcription, subunit 11 homolog ( <i>S. cerevisiae</i> )      | Med11                  | 1.91±0.32   |
| mediator of RNA polymerase II transcription, subunit 19 homolog (yeast) (predicted)           | Med19_predicted        | 0.59±0.03   |
| mediator of RNA polymerase II transcription, subunit 25 homolog (yeast) (predicted)           | Med25_predicted        | 1.69±0.19   |
| mediator of RNA polymerase II transcription, subunit 28 homolog (yeast) (predicted)           | Med28_predicted        | 2.95±0.18   |
| mediator of RNA polymerase II transcription, subunit 31 homolog (yeast) (predicted)           | Med31_predicted        | 3.17±0.66   |
| mediator of RNA polymerase II transcription, subunit 4 homolog (yeast)                        | Med4                   | 0.77±0.07   |
| mediator of RNA polymerase II transcription, subunit 6 homolog (yeast) (predicted)            | Med6_predicted         | 2.66±0.72   |
| mediator of RNA polymerase II transcription, subunit 8 homolog (yeast) (predicted)            | Med8_predicted         | 0.63±0.07   |
| megakaryoblastic leukemia (translocation) 1                                                   | Mkl1                   | 0.76±0.21   |
| melanocyte proliferating gene 1                                                               | Myq1                   | 1.6±0.12    |
| melanoma antigen, family D, 1                                                                 | Maged1                 | 4.93±1.36   |
| melanoma antigen, family D, 2                                                                 | Maged2                 | 2.78±0.11   |
| melanoma antigen, family H, 1                                                                 | Mageh1                 | 2.33±0.27   |
| melanoma inhibitory activity 1                                                                | Mia1                   | 0.21±0.13   |
| melanoma nuclear protein 13 /// similar to CG3420-PA                                          | LOC688169 /// Mel13    | 1.41±0.47   |
| membralin                                                                                     | Mbrl                   | 1.27±0.82   |
| membrane associated guanylate kinase, WW and PDZ domain containing 1                          | Magi1                  | 1.46±0      |
| membrane associated guanylate kinase, WW and PDZ domain containing 3                          | Magi3                  | 2.54±0.76   |
| membrane bound C2 domain containing protein                                                   | Mbc2                   | 0.52±0.64   |
| membrane bound O-acyltransferase domain containing 2                                          | Mboat2                 | 1.51±0.26   |
| membrane bound O-acyltransferase domain containing 5                                          | Mboat5                 | 4.66±0.2    |
| membrane metallo endopeptidase                                                                | Mme                    | 9.99±0.23   |
| membrane protein, palmitoylated 5 (MAGUK p55 subfamily member 5) (predicted)                  | Mpp5_predicted         | 2.29±0.26   |
| membrane protein, palmitoylated 6 (MAGUK p55 subfamily member 6) (predicted)                  | Mpp6_predicted         | 1.06±0.33   |
| Membrane-associated DHHC1 zinc finger protein                                                 | LOC291967              | 0.84±0.24   |
| membrane-associated ring finger (C3HC4) 2                                                     | March2                 | 5.31±0.91   |
| membrane-associated ring finger (C3HC4) 3                                                     | March3                 | 0.56±0      |
| membrane-associated ring finger (C3HC4) 5 (predicted)                                         | March5_predicted       | 3.26±0.47   |
| Membrane-associated ring finger (C3HC4) 7                                                     | March7                 | 1.93±0.21   |
| membrane-associated ring finger (C3HC4) 8 (predicted)                                         | March8_predicted       | 2.65±0.31   |
| membrane-bound transcription factor peptidase, site 1                                         | Mbtps1                 | 2.95±0.02   |
| menage a trois 1                                                                              | Mnat1                  | 2.35±0.3    |
| Meningioma expressed antigen 5 (hyaluronidase)                                                | Mgea5                  | 3.25±1.64   |
| mercaptopyruvate sulfurtransferase                                                            | Mpst                   | 4.2±0.12    |
| mesoderm development candidate 1                                                              | Mesdc1                 | 0.95±0.59   |
| mesoderm development candidate 2                                                              | Mesdc2                 | 5.56±1.19   |
| mesoderm induction early response 1 homolog ( <i>Xenopus laevis</i> )                         | Mier1                  | 6.03±0.57   |
| mesoderm induction early response 1, family member 3                                          | Mier3                  | 1.17±0.18   |
| met proto-oncogene                                                                            | Asz1 /// Cav1 /// Cav2 | 0.97±0.04   |
| metadherin                                                                                    | Mtdh                   | 1.26±0.52   |
| metal response element binding transcription factor 1 (predicted)                             | Mtf1_predicted         | 1.38±0.05   |
| metal response element binding transcription factor 2                                         | Mtf2                   | 1.28±0.01   |
| metallophosphoesterase 1 (predicted)                                                          | Mppe1_predicted        | 3.42±0.91   |
| metallothionein 1a                                                                            | Mt1a                   | 35.89±21.05 |
| metallothionein 2A                                                                            | Mt2A                   | 31.77±19.14 |
| metastasis associated 1                                                                       | Mta1                   | 0.67±0.25   |
| metastasis suppressor 1 (predicted)                                                           | Mtss1_predicted        | 10.64±0.59  |
| metastasis-associated gene family, member 2                                                   | Mta2                   | 1.26±0.08   |
| metaxin 2                                                                                     | Mtx2                   | 6.83±2.2    |
| meteorin, glial cell differentiation regulator-like                                           | Metrl                  | 4.08±0.02   |
| methionine adenosyltransferase II, alpha                                                      | Mat2a                  | 8.95±3.18   |
| methionine aminopeptidase 2                                                                   | Metap2                 | 5.69±1.33   |
| methionine aminopeptidase-like 1 (predicted)                                                  | Metap1_predicted       | 0.55±0.08   |

|                                                                                                                                      |                               |            |
|--------------------------------------------------------------------------------------------------------------------------------------|-------------------------------|------------|
| methionine sulfoxide reductase A                                                                                                     | Msra                          | 0.58±0.43  |
| methionine sulfoxide reductase B2                                                                                                    | Msrb2                         | 2.21±0.24  |
| methionine-tRNA synthetase 2 (mitochondrial) (predicted)                                                                             | Mars2_predicted               | 0.94±0.24  |
| methionyl aminopeptidase 1 (predicted)                                                                                               | Metap1_predicted              | 2.2±0.19   |
| methyl-CpG binding domain protein 1                                                                                                  | Mbd1                          | 2.01±0.63  |
| methyl-CpG binding domain protein 2                                                                                                  | Mbd2                          | 9.87±1.34  |
| methyl-CpG binding domain protein 3 (predicted)                                                                                      | Mbd3_predicted                | 4.45±0.73  |
| methyl-CpG binding domain protein 6 (predicted)                                                                                      | Mbd6_predicted                | 0.6±0.3    |
| methylcrotonoyl-Coenzyme A carboxylase 1 (alpha)                                                                                     | Mccc1                         | 6.28±0.38  |
| methylcrotonoyl-Coenzyme A carboxylase 2 (beta)                                                                                      | Mccc2                         | 13.4±0.97  |
| methylenetetrahydrofolate dehydrogenase (NADP+ dependent) 2-like (predicted)                                                         | Mthfd2_predicted              | 0.62±0.33  |
| methylenetetrahydrofolate dehydrogenase (NADP+ dependent), methylenetetrahydrofolate cyclohydrolase, formyltetrahydrofolate synthase | Mthfd1                        | 7.66±0.19  |
| methylmalonic aciduria (cobalamin deficiency) cblA type                                                                              | Mmaa                          | 0.9±0.25   |
| methylmalonic aciduria (cobalamin deficiency) cblC type, with homocystinuria                                                         | Mmachc                        | 2.95±1.13  |
| methylmalonyl CoA epimerase (predicted)                                                                                              | Mcee_predicted                | 7.22±0.8   |
| methylmalonyl-Coenzyme A mutase                                                                                                      | Mut                           | 6.19±2.77  |
| methylphosphate capping enzyme                                                                                                       | Mepce                         | 2.5±0.27   |
| Methylthioadenosine phosphorylase (predicted)                                                                                        | Mtap_predicted                | 0.84±0.27  |
| methyltransferase 10 domain containing                                                                                               | Mett10d                       | 1.14±0.07  |
| methyltransferase like 10                                                                                                            | Mett10                        | 0.52±0.06  |
| methyltransferase like 2 (predicted)                                                                                                 | Mett2_predicted               | 0.76±0.23  |
| methyltransferase like 5                                                                                                             | Mett5                         | 2.66±0.73  |
| methyltransferase like 6                                                                                                             | Mett6                         | 0.49±0.28  |
| methyltransferase like 7A                                                                                                            | Mett7a                        | 1.97±0.65  |
| methyltransferase-like 3                                                                                                             | Mett3                         | 1.76±0.56  |
| mevalonate kinase                                                                                                                    | Mvk                           | 0.81±0.06  |
| MICAL-like 2                                                                                                                         | Micall2                       | 0.57±0.25  |
| microfibrillar-associated protein 3                                                                                                  | Mfap3                         | 1.23±0.13  |
| microfibrillar-associated protein 3-like                                                                                             | Mfap3l                        | 0.68±0.09  |
| microphthalmia-associated transcription factor                                                                                       | Mitf                          | 4.17±0.14  |
| microorchidia 2A                                                                                                                     | Morc2a                        | 0.94±0     |
| microorchidia 3 (predicted)                                                                                                          | Morc3_predicted               | 1.48±0.32  |
| microorchidia 4                                                                                                                      | Morc4                         | 0.34±0.03  |
| microsomal glutathione S-transferase 1                                                                                               | Mgst1                         | 15.57±3.8  |
| microsomal glutathione S-transferase 2 (predicted)                                                                                   | Mgst2_predicted               | 0.21±0.01  |
| microsomal glutathione S-transferase 3 (predicted)                                                                                   | Mgst3_predicted               | 16.14±3.65 |
| microspherule protein 1                                                                                                              | Mcrs1                         | 2.77±0.04  |
| Microtubule associated monooxygenase, calponin and LIM domain containing 3                                                           | Mical3                        | 0.86±0.2   |
| microtubule associated serine/threonine kinase 2 (predicted)                                                                         | Mast2_predicted               | 0.8±0.21   |
| microtubule associated serine/threonine kinase family member 4                                                                       | Mast4                         | 1.45±0.12  |
| microtubule-associated protein 1 light chain 3 alpha                                                                                 | Map1lc3a                      | 1.92±0.08  |
| microtubule-associated protein 1 light chain 3 beta                                                                                  | Map1lc3b                      | 3.9±0.16   |
| microtubule-associated protein 2                                                                                                     | Mtap2                         | 1.28±0.3   |
| microtubule-associated protein 4                                                                                                     | Mtap4                         | 0.7±0.28   |
| microtubule-associated protein 7 (predicted)                                                                                         | Mtap7_predicted               | 1.99±0.6   |
| microtubule-associated protein 7 domain containing 1                                                                                 | Mtap7d1                       | 0.21±0.4   |
| microtubule-associated protein tau                                                                                                   | Mapt                          | 1.4±0.09   |
| microtubule-associated protein, RP/EB family, member 1                                                                               | Mapre1                        | 3.6±0.32   |
| microtubule-associated protein, RP/EB family, member 3                                                                               | Mapre3                        | 0.58±0.04  |
| MID1 interacting protein 1 (gastrulation specific G12 homolog (zebrafish))                                                           | Mid1ip1                       | 7.06±1.2   |
| midasin homolog (yeast)                                                                                                              | Mdn1                          | 0.59±0.19  |
| midasin homolog (yeast) /// LYR motif containing 2                                                                                   | Lyrm2 /// Mdn1                | 3.41±0.71  |
| midnolin (predicted)                                                                                                                 | Midn_predicted                | 5.33±0.43  |
| MIF4G domain containing                                                                                                              | Mif4gd                        | 2.44±0.6   |
| minichromosome maintenance deficient 2 mitotin (S. cerevisiae) (predicted)                                                           | Mcm2_predicted                | 1.97±0.05  |
| minichromosome maintenance deficient 3 (S. cerevisiae) associated protein (predicted)                                                | Mcm3ap_predicted              | 0.93±0.19  |
| minichromosome maintenance deficient 4 homolog (S. cerevisiae)                                                                       | Mcm4                          | 1.05±0.16  |
| minichromosome maintenance deficient 5, cell division cycle 46 (S. cerevisiae) (predicted)                                           | Mcm5_predicted                | 0.59±0.03  |
| minichromosome maintenance deficient 6 (MIS5 homolog, S. pombe) (S. cerevisiae)                                                      | Mcm6                          | 1.26±0.18  |
| minichromosome maintenance deficient 7 (S. cerevisiae)                                                                               | Mcm7                          | 2.28±0.52  |
| minichromosome maintenance deficient 8 (S. cerevisiae) (predicted)                                                                   | Mcm8_predicted                | 0.24±0.04  |
| misato homolog 1 (Drosophila) (predicted)                                                                                            | Msto1_predicted               | 0.4±0.12   |
| MIT, microtubule interacting and transport, domain containing 1                                                                      | Mitd1                         | 0.27±0.13  |
| mitochondrial ribosomal protein S7                                                                                                   | Mrps7                         | 3.67±0.08  |
| Mitochondrial acyl-CoA thioesterase 1                                                                                                | Mte1                          | 1.07±0.19  |
| mitochondrial carrier homolog 1 (C. elegans)                                                                                         | Mtch1                         | 12.5±0.91  |
| mitochondrial carrier homolog 2 (C. elegans) (predicted)                                                                             | Mtch2_predicted               | 12.69±4.17 |
| mitochondrial carrier triple repeat 1                                                                                                | Mcart1                        | 7.6±1.15   |
| Mitochondrial fission regulator 1 (predicted)                                                                                        | Mtfr1_predicted               | 4.64±0.8   |
| mitochondrial intermediate peptidase                                                                                                 | Mipep                         | 6.53±1.7   |
| mitochondrial methionyl-tRNA formyltransferase                                                                                       | Mfamt                         | 0.76±0.18  |
| mitochondrial protein 18 kDa                                                                                                         | Mtp18                         | 2.4±0.78   |
| mitochondrial ribosomal protein 63                                                                                                   | Mrp63                         | 3.86±0.33  |
| mitochondrial ribosomal protein L1 (predicted)                                                                                       | Mrpl1_predicted               | 2.85±1.08  |
| mitochondrial ribosomal protein L10 (predicted) /// similar to mitochondrial ribosomal protein L10                                   | LOC688165 /// LOC6912.06±0.18 |            |
| mitochondrial ribosomal protein L11                                                                                                  | mrpl11                        | 6.46±1.09  |
| mitochondrial ribosomal protein L12                                                                                                  | Mrpl12                        | 16.17±4.04 |
| mitochondrial ribosomal protein L13                                                                                                  | Mrpl13                        | 8.16±1.63  |
| mitochondrial ribosomal protein L14 (predicted)                                                                                      | Mrpl14_predicted              | 2.81±0.45  |
| mitochondrial ribosomal protein L15 (predicted)                                                                                      | Mrpl15_predicted              | 15.04±1    |
| mitochondrial ribosomal protein L16                                                                                                  | Mrpl16                        | 7.94±1.77  |
| mitochondrial ribosomal protein L17                                                                                                  | Mrpl17                        | 12.3±0.12  |
| mitochondrial ribosomal protein L18 (predicted)                                                                                      | Mrpl18_predicted              | 7.73±1.2   |
| mitochondrial ribosomal protein L19                                                                                                  | Mrpl19                        | 2.79±1.03  |
| mitochondrial ribosomal protein L2                                                                                                   | Mrpl2                         | 4±0.9      |
| mitochondrial ribosomal protein L20                                                                                                  | Mrpl20                        | 4.51±1.1   |
| mitochondrial ribosomal protein L21 (predicted)                                                                                      | Mrpl21_predicted              | 2.31±0.18  |

|                                                                              |                   |            |
|------------------------------------------------------------------------------|-------------------|------------|
| mitochondrial ribosomal protein L22 (predicted)                              | Mrpl22_predicted  | 7.86±0.94  |
| mitochondrial ribosomal protein L23                                          | Mrpl23            | 4.4±0.35   |
| mitochondrial ribosomal protein L24                                          | mrpl24            | 6.39±0.37  |
| mitochondrial ribosomal protein L27 (predicted)                              | Mrpl27_predicted  | 8.41±1.66  |
| mitochondrial ribosomal protein L28                                          | Mrpl28            | 4.61±1.13  |
| mitochondrial ribosomal protein L3 (predicted)                               | Mrpl3_predicted   | 8.12±2.46  |
| mitochondrial ribosomal protein L30 (predicted)                              | Mrpl30_predicted  | 3.66±0.29  |
| mitochondrial ribosomal protein L32 (predicted)                              | Mrpl32_predicted  | 6.79±1.19  |
| mitochondrial ribosomal protein L34                                          | Mrpl34            | 3.68±0.2   |
| mitochondrial ribosomal protein L35 (predicted)                              | Mrpl35_predicted  | 4.21±0.02  |
| mitochondrial ribosomal protein L36 (predicted)                              | Mrpl36_predicted  | 8.59±1.89  |
| mitochondrial ribosomal protein L37                                          | Mrpl37            | 6.08±1     |
| mitochondrial ribosomal protein L38                                          | Mrpl38            | 1.93±0.72  |
| mitochondrial ribosomal protein L4 (predicted)                               | Mrpl4_predicted   | 3.62±0.83  |
| mitochondrial ribosomal protein L40                                          | Mrpl40            | 3.87±0.7   |
| mitochondrial ribosomal protein L41                                          | Mrpl41            | 15.27±2.79 |
| mitochondrial ribosomal protein L42 (predicted)                              | Mrpl42_predicted  | 9.76±3.28  |
| mitochondrial ribosomal protein L43 (predicted)                              | Mrpl43_predicted  | 5.88±1.45  |
| mitochondrial ribosomal protein L44                                          | Mrpl44            | 3.24±0.69  |
| mitochondrial ribosomal protein L45 (predicted)                              | Mrpl45_predicted  | 4.58±0.74  |
| mitochondrial ribosomal protein L46                                          | Mrpl46            | 2.22±0.6   |
| mitochondrial ribosomal protein L47                                          | Mrpl47            | 1.96±0.6   |
| mitochondrial ribosomal protein L48 (predicted)                              | Mrpl48_predicted  | 5±1.34     |
| Mitochondrial ribosomal protein L49                                          | Mrpl49            | 2.38±1.11  |
| mitochondrial ribosomal protein L50 (predicted)                              | Mrpl50_predicted  | 5.53±1.37  |
| mitochondrial ribosomal protein L51 (predicted)                              | Mrpl51_predicted  | 5.64±1.09  |
| mitochondrial ribosomal protein L52 (predicted)                              | Mrpl52_predicted  | 3.31±0.01  |
| mitochondrial ribosomal protein L53 (predicted)                              | Mrpl53_predicted  | 8.99±0.47  |
| mitochondrial ribosomal protein L54 (predicted)                              | Mrpl54_predicted  | 11.29±1.18 |
| mitochondrial ribosomal protein L55 (predicted)                              | Mrpl55_predicted  | 5.18±1.09  |
| mitochondrial ribosomal protein L9                                           | mrpl9             | 4.14±0.1   |
| mitochondrial ribosomal protein S11                                          | Mrps11            | 3.88±0.23  |
| mitochondrial ribosomal protein S12 (predicted)                              | Mrps12_predicted  | 4.74±0.73  |
| mitochondrial ribosomal protein S14 (predicted)                              | Mrps14_predicted  | 5.61±0.6   |
| mitochondrial ribosomal protein S15                                          | Mrps15            | 5.51±1.77  |
| mitochondrial ribosomal protein S16                                          | Mrps16            | 10.87±2.65 |
| mitochondrial ribosomal protein S17 (predicted)                              | Mrps17_predicted  | 9.82±1.16  |
| mitochondrial ribosomal protein S18A                                         | Mrps18a           | 6.66±0.94  |
| mitochondrial ribosomal protein S18C (predicted)                             | Mrps18c_predicted | 1.79±1.65  |
| mitochondrial ribosomal protein S2 (predicted)                               | Mrps2_predicted   | 2.14±0.32  |
| mitochondrial ribosomal protein S21                                          | Mrps21            | 6.56±0.03  |
| mitochondrial ribosomal protein S23 (predicted)                              | Mrps23_predicted  | 12.66±2.67 |
| mitochondrial ribosomal protein S24 (predicted)                              | Mrps24_predicted  | 7.33±1.2   |
| mitochondrial ribosomal protein S25                                          | Mrps25            | 5.79±1.24  |
| mitochondrial ribosomal protein S26 (predicted)                              | Mrps26_predicted  | 6.44±0.7   |
| mitochondrial ribosomal protein S27 (predicted)                              | Mrps27_predicted  | 1.36±0.15  |
| mitochondrial ribosomal protein S30 (predicted)                              | Mrps30_predicted  | 6.27±1.5   |
| mitochondrial ribosomal protein S31 (predicted)                              | Mrps31_predicted  | 2.49±0.86  |
| mitochondrial ribosomal protein S33 (predicted)                              | Mrps33_predicted  | 7.29±1.28  |
| mitochondrial ribosomal protein S34 (predicted)                              | Mrps34_predicted  | 3.15±0.8   |
| mitochondrial ribosomal protein S35 (predicted)                              | Mrps35_predicted  | 4.03±0.63  |
| mitochondrial ribosomal protein S36 (predicted)                              | Mrps36_predicted  | 15.17±2.45 |
| mitochondrial ribosomal protein S5 (predicted)                               | Mrps5_predicted   | 2.85±0.79  |
| mitochondrial ribosomal protein S9                                           | Mrps9             | 2.44±0.2   |
| mitochondrial ribosome recycling factor                                      | Mrrf              | 1.08±0.25  |
| mitochondrial trans-2-enoyl-CoA reductase                                    | Mecr              | 1.97±0.47  |
| mitochondrial transcription termination factor                               | Mterf             | 2.97±0.85  |
| mitochondrial translation optimization 1 homolog (S. cerevisiae) (predicted) | Mto1_predicted    | 1.5±0.29   |
| mitochondrial translational initiation factor 2                              | Mtif2             | 2.34±2.46  |
| mitochondrial translational release factor 1-like                            | Mtrf11            | 0.87±0.05  |
| mitochondrial ubiquitin ligase activator of NFKB 1                           | Mul1              | 0.93±0.14  |
| mitofusin 1                                                                  | Mfn1              | 3.77±0.21  |
| mitofusin 2                                                                  | Mfn2              | 10.67±1.8  |
| Mitogen activated protein kinase 1                                           | Mapk1             | 1.49±0.53  |
| mitogen activated protein kinase 13                                          | Mapk13            | 1.52±0     |
| mitogen activated protein kinase 14                                          | Mapk14            | 4.6±0.61   |
| mitogen activated protein kinase 3                                           | Mapk3             | 1.45±0.43  |
| mitogen activated protein kinase kinase 1                                    | Map2k1            | 2.31±0.52  |
| mitogen activated protein kinase kinase 2                                    | Map2k2            | 3.9±0.13   |
| mitogen activated protein kinase kinase 3                                    | Map2k3            | 3.81±0.75  |
| mitogen activated protein kinase kinase 4                                    | Map2k4            | 0.74±0.04  |
| mitogen activated protein kinase kinase 5                                    | Map2k5            | 1.02±0.18  |
| mitogen activated protein kinase kinase 7                                    | Map2k7            | 0.94±0.05  |
| mitogen activated protein kinase kinase kinase 1                             | Map3k1            | 5.27±0.12  |
| mitogen activated protein kinase kinase kinase 12                            | Map3k12           | 2.23±0.07  |
| mitogen activated protein kinase kinase kinase 3 (predicted)                 | Map3k3_predicted  | 0.62±0.16  |
| mitogen activated protein kinase kinase kinase 4 (predicted)                 | Map3k4_predicted  | 0.99±0.24  |
| Mitogen activated protein kinase kinase kinase 7 (predicted)                 | Map3k7_predicted  | 2.88±0.74  |
| mitogen activated protein kinase kinase kinase 2 (predicted)                 | Map4k2_predicted  | 0.5±0.12   |
| mitogen-activated protein binding protein interacting protein                | Mapbpip           | 11.72±2.12 |
| mitogen-activated protein kinase 1 interacting protein 1                     | Mapk1ip1          | 1.53±0.17  |
| mitogen-activated protein kinase 6                                           | Mapk6             | 0.27±0.61  |
| mitogen-activated protein kinase 8                                           | Mapk8             | 0.66±0.15  |
| mitogen-activated protein kinase 8 interacting protein 1                     | Mapk8ip1          | 6.26±0.79  |
| mitogen-activated protein kinase 8 interacting protein 3                     | Mapk8ip3          | 0.52±0.05  |
| mitogen-activated protein kinase 9                                           | Mapk9             | 0.43±0.06  |
| mitogen-activated protein kinase associated protein 1                        | Mapkap1           | 1.6±0.08   |

|                                                                                    |                       |            |
|------------------------------------------------------------------------------------|-----------------------|------------|
| mitogen-activated protein kinase kinase 1 interacting protein 1                    | Map2k1ip1             | 3.22±0.31  |
| mitogen-activated protein kinase kinase 6                                          | Map2k6                | 1.22±0.27  |
| mitogen-activated protein kinase kinase kinase 11                                  | Map3k11               | 0.57±0.25  |
| mitogen-activated protein kinase kinase kinase 14 (predicted)                      | Map3k14_predicted     | 0.92±0.2   |
| mitogen-activated protein kinase kinase kinase 7 interacting protein 1 (predicted) | Map3k7ip1_predicted   | 1.94±0.22  |
| mitogen-activated protein kinase kinase kinase 7 interacting protein 2             | Map3k7ip2             | 3.08±0.2   |
| mitogen-activated protein kinase kinase kinase kinase 3                            | Map4k3                | 4.96±0.55  |
| mitogen-activated protein kinase kinase kinase kinase 4 (predicted)                | Map4k4_predicted      | 0.33±0.17  |
| mitogen-activated protein kinase kinase kinase kinase 5                            | Map4k5                | 0.55±0.08  |
| Mki67 (FHA domain) interacting nucleolar phosphoprotein                            | Mki67ip               | 2.12±0.66  |
| MMR_HSR1 domain containing protein RGD1359460                                      | RGD1359460            | 0.35±0.28  |
| MOB1, Mps One Binder kinase activator-like 1A (yeast) (predicted)                  | Mobk11a_predicted     | 0.73±0.1   |
| MOB1, Mps One Binder kinase activator-like 1B (yeast)                              | Mobk11b               | 2.99±0.37  |
| MOB1, Mps One Binder kinase activator-like 2A (yeast)                              | Mobk12a               | 0.94±0.22  |
| MOB1, Mps One Binder kinase activator-like 3 (yeast)                               | Mobk13                | 1.61±0.68  |
| MOCO sulphurase C-terminal domain containing 2                                     | Mosc2                 | 10.04±2.65 |
| molybdenum cofactor synthesis 1 (predicted)                                        | Mocs1_predicted       | 0.7±0.06   |
| molybdenum cofactor synthesis 2                                                    | Mocs2                 | 3.04±0.61  |
| MON1 homolog A (yeast) (predicted)                                                 | Mon1a_predicted       | 0.98±0.25  |
| monoamine oxidase A                                                                | Maoa                  | 1.05±0.04  |
| monocyte to macrophage differentiation-associated                                  | Mmd                   | 5.91±0.44  |
| Monoglyceride lipase                                                               | Mgl                   | 5.04±2.18  |
| Morf4 family associated protein 1                                                  | Mrfap1                | 13.3±2.56  |
| MORN repeat containing 1                                                           | Morn1                 | 0.34±0.04  |
| mortality factor 4 like 1                                                          | Morf4l1               | 12.41±0.31 |
| mortality factor 4 like 1 /// similar to mortality factor 4 like 1 isoform b       | LOC309220 /// Morf4l1 | 13.53±0.99 |
| mortality factor 4 like 2                                                          | Morf4l2               | 14.74±1.22 |
| motile sperm domain containing 1 /// similar to motile sperm domain containing 1   | LOC686087 /// Mospd1  | 2±0.18     |
| motile sperm domain containing 3                                                   | Mospd3                | 1.81±0.14  |
| M-phase phosphoprotein 1 (predicted)                                               | Mphosph1_predicted    | 0.51±0.19  |
| M-phase phosphoprotein 10 (U3 small nucleolar ribonucleoprotein) (predicted)       | Mphosph10_predicted   | 0.55±0.21  |
| M-phase phosphoprotein 8                                                           | Mphosph8              | 3.22±0.4   |
| M-phase phosphoprotein 8 /// poly (ADP-ribose) polymerase family, member 4         | Mphosph8 /// Parp4    | 0.61±0.34  |
| Mpv17 transgene, kidney disease mutant-like (predicted)                            | Mpv17l_predicted      | 4.35±0.39  |
| MRS2 magnesium homeostasis factor homolog (S. cerevisiae)                          | Mrs2                  | 0.98±0.59  |
| MRT4, mRNA turnover 4, homolog (S. cerevisiae)                                     | Mrto4                 | 0.88±0.07  |
| MTERF domain containing 1                                                          | Mterfd1               | 4.49±0.3   |
| MTERF domain containing 2                                                          | Mterfd2               | 2.63±0.37  |
| MTERF domain containing 3                                                          | Mterfd3               | 1.51±0     |
| mucin 1, transmembrane                                                             | Muc1                  | 10.06±2.14 |
| mucin and cadherin like                                                            | Mucdhl                | 4.57±0.09  |
| mucolipin 1 (predicted)                                                            | Mcoln1_predicted      | 2.12±0.09  |
| multiple coagulation factor deficiency 2                                           | Mcfd2                 | 4.15±0.67  |
| multiple EGF-like-domains 8                                                        | Megf8                 | 0.45±0.26  |
| multiple endocrine neoplasia 1                                                     | Men1                  | 1.74±0.29  |
| multiple inositol polyphosphate histidine phosphatase 1                            | Minpp1                | 7.86±0.16  |
| multiple PDZ domain protein                                                        | Mpdz                  | 0.89±0.01  |
| Musashi homolog 2 (Drosophila)                                                     | Msi2                  | 19.42±3.12 |
| muscle and microspikes RAS                                                         | Mras                  | 0.71±0.37  |
| muscle glycogen phosphorylase                                                      | Pygm                  | 0.2±0.08   |
| muskelin 1, intracellular mediator containing kelch motifs                         | Mkin1                 | 2.62±0.16  |
| muted                                                                              | Muted                 | 2.33±0.4   |
| Mlh1                                                                               | Mlh1                  | 1.16±0.19  |
| Msh2                                                                               | Msh2                  | 1.56±0.13  |
| Mybbp1a                                                                            | Mybbp1a               | 1.54±0.61  |
| P42pop                                                                             | P42pop                | 0.38±0.23  |
| Mysm1_predicted                                                                    | Mysm1_predicted       | 0.56±0.06  |
| Mycbp2                                                                             | Mycbp2                | 3.4±1.3    |
| Mina                                                                               | Mina                  | 0.31±0.09  |
| Mal                                                                                | Mal                   | 26.12±2.05 |
| Myef2                                                                              | Myef2                 | 4.79±1.09  |
| Mpz11                                                                              | Mpz11                 | 1.93±1.29  |
| Mag                                                                                | Mag                   | 0.22±0.12  |
| Mcl1                                                                               | Mcl1                  | 5.63±0.56  |
| Myd116                                                                             | Myd116                | 2.17±4.26  |
| Myd88                                                                              | Myd88                 | 3.2±0.92   |
| Mif2_predicted                                                                     | Mif2_predicted        | 5.71±0.35  |
| Mlit10                                                                             | Mlit10                | 1.26±0.61  |
| Mlit3                                                                              | Mlit3                 | 2.22±0.21  |
| Mlit6_predicted                                                                    | Mlit6_predicted       | 4.24±1.19  |
| Mlit1                                                                              | Mlit1                 | 0.92±0.3   |
| Mli1                                                                               | Mli1                  | 1.98±0.57  |
| Mli5                                                                               | Mli5                  | 5.88±0.84  |
| Myadm                                                                              | Myadm                 | 2.19±0.51  |
| Myeov2                                                                             | Myeov2                | 12.86±0.9  |
| Mef2d                                                                              | Mef2d                 | 0.32±0.09  |
| Mdfic_predicted                                                                    | Mdfic_predicted       | 0.25±0.2   |
| Isyna1                                                                             | Isyna1                | 5.54±0.74  |
| Myo5b                                                                              | Myo5b                 | 2.28±0.28  |
| Mybpc2_predicted                                                                   | Mybpc2_predicted      | 0.22±0.02  |
| Myo1c                                                                              | Myo1c                 | 2.23±0.04  |
| LOC686250 /// Myo1c                                                                | LOC686250 /// Myo1c   | 8.92±0.43  |
| Myo1d                                                                              | Myo1d                 | 3.82±0.74  |
| Myo1e                                                                              | Myo1e                 | 1.76±0.45  |
| Myo1q                                                                              | Myo1q                 | 0.68±0.04  |
| Myo9b                                                                              | Myo9b                 | 0.58±0.09  |
| Mylk2                                                                              | Mylk2                 | 0.7±0.78   |



|                                                                                                                        |                        |             |
|------------------------------------------------------------------------------------------------------------------------|------------------------|-------------|
| myosin light chain, regulatory B                                                                                       | Mricb                  | 9.7±3.05    |
| myosin phosphatase-Rho interacting protein                                                                             | M-rip                  | 7.42±1.09   |
| myosin regulatory light chain interacting protein (predicted)                                                          | Mylip_predicted        | 0.87±0.68   |
| myosin VC (predicted)                                                                                                  | Myo5c_predicted        | 0.5±0.15    |
| myosin VI                                                                                                              | Myo6                   | 3.47±0.78   |
| myosin X (predicted)                                                                                                   | Myo10_predicted        | 1.62±0.28   |
| Myosin, heavy polypeptide 9, non-muscle                                                                                | Myh9                   | 6.75±1.13   |
| myosin, light polypeptide 6, alkali, smooth muscle and non-muscle (predicted)                                          | LOC684520 /// Myl6 /// | 24.21±1.24  |
| myosin, light polypeptide kinase (predicted)                                                                           | Mylk_predicted         | 8.62±0.49   |
| myotrophin                                                                                                             | Mtpn                   | 8.76±0.98   |
| myotubularin related protein 1 (predicted)                                                                             | Mtmr1_predicted        | 0.22±0.04   |
| myotubularin related protein 10                                                                                        | Mtmr10                 | 2.61±0.97   |
| myotubularin related protein 14                                                                                        | Mtmr14                 | 1.2±0.19    |
| myotubularin related protein 2 (predicted)                                                                             | Mtmr2_predicted        | 4.71±0.48   |
| myotubularin related protein 3                                                                                         | Mtmr3                  | 3.41±0.7    |
| myotubularin related protein 4 (predicted)                                                                             | Mtmr4_predicted        | 2.2±1.11    |
| myotubularin related protein 6 (predicted)                                                                             | Mtmr6_predicted        | 2±0.81      |
| myotubularin related protein 7 (predicted)                                                                             | Mtmr7_predicted        | 4.7±0.71    |
| myotubularin related protein 9                                                                                         | Mtmr9                  | 1.19±0.13   |
| MYST histone acetyltransferase 2                                                                                       | Myst2                  | 1.42±0.36   |
| myxovirus (influenza virus) resistance 2                                                                               | Mx2                    | 0.39±0.21   |
| N-6 adenine-specific DNA methyltransferase 1 (putative)                                                                | N6amt1                 | 1.59±0.46   |
| N-6 adenine-specific DNA methyltransferase 2 (putative)                                                                | N6amt2                 | 1.76±0.43   |
| N-acetyl galactosaminidase, alpha                                                                                      | Naga                   | 1.3±0.1     |
| N-acetylglucosamine kinase                                                                                             | Naqk                   | 0.62±0.16   |
| N-acetylglucosamine-1-phosphotransferase, gamma subunit                                                                | Gnptg                  | 1.85±0.37   |
| N-acetylneuraminic acid synthase (sialic acid synthase) (predicted)                                                    | Nans_predicted         | 6.05±1.64   |
| N-acetyltransferase 1 (arylamine N-acetyltransferase)                                                                  | Nat1                   | 0.7±0.43    |
| N-acetyltransferase 11                                                                                                 | Nat11                  | 1.67±0.4    |
| N-acetyltransferase 13                                                                                                 | Nat13                  | 1.5±0.03    |
| N-acetyltransferase 14                                                                                                 | Nat14                  | 0.94±0.16   |
| N-acetyltransferase 5 (ARD1 homolog, <i>S. cerevisiae</i> ) (predicted)                                                | Nat5_predicted         | 5.81±0.69   |
| N-acetyltransferase ARD1 homolog ( <i>S. cerevisiae</i> ) (predicted)                                                  | Ard1_predicted         | 0.55±0.08   |
| N-acylsphingosine amidohydrolase 1                                                                                     | Asah1                  | 3.53±1.01   |
| NAD kinase                                                                                                             | Nadk                   | 3.47±0.59   |
| NAD(P) dependent steroid dehydrogenase-like                                                                            | Nsdhl                  | 1.68±0.42   |
| NAD(P) dependent steroid dehydrogenase-like                                                                            | Hspc105                | 0.27±0.06   |
| NAD(P)H dehydrogenase, quinone 1                                                                                       | Nqo1                   | 2.17±0.88   |
| NAD(P)H dehydrogenase, quinone 2                                                                                       | Nqo2                   | 2.46±0.23   |
| NADH dehydrogenase (ubiquinone) 1 alpha subcomplex 10-like 1 /// NADH dehydrogenase (ubiquinone) 1 alpha subcomplex 10 | Ndufa10 /// Ndufa1011  | 12.11±3.24  |
| NADH dehydrogenase (ubiquinone) 1 alpha subcomplex 11                                                                  | Ndufa11                | 18.3±5.39   |
| NADH dehydrogenase (ubiquinone) 1 alpha subcomplex 5                                                                   | Ndufa5                 | 7.12±0.48   |
| NADH dehydrogenase (ubiquinone) 1 alpha subcomplex, 1 (predicted)                                                      | Ndufa1_predicted       | 48.68±1.98  |
| NADH dehydrogenase (ubiquinone) 1 alpha subcomplex, 12 (predicted)                                                     | Ndufa12_predicted      | 29.47±7.77  |
| NADH dehydrogenase (ubiquinone) 1 alpha subcomplex, 13 (predicted)                                                     | Ndufa13_predicted      | 21.13±3.57  |
| NADH dehydrogenase (ubiquinone) 1 alpha subcomplex, 2 (predicted)                                                      | Ndufa2_predicted       | 22.23±2.93  |
| NADH dehydrogenase (ubiquinone) 1 alpha subcomplex, 4                                                                  | Ndufa4                 | 39.78±4.06  |
| NADH dehydrogenase (ubiquinone) 1 alpha subcomplex, 6 (B14) (predicted)                                                | Ndufa6_predicted       | 18.7±1.28   |
| NADH dehydrogenase (ubiquinone) 1 alpha subcomplex, 7 (B14.5a) (predicted)                                             | Ndufa7_predicted       | 15.7±2.62   |
| NADH dehydrogenase (ubiquinone) 1 alpha subcomplex, 8                                                                  | Ndufa8                 | 15.98±2.27  |
| NADH dehydrogenase (ubiquinone) 1 alpha subcomplex, 9                                                                  | Ndufa9                 | 23.2±1.47   |
| NADH dehydrogenase (ubiquinone) 1 alpha subcomplex, assembly factor 1 (predicted)                                      | Ndufaf1_predicted      | 0.55±0.04   |
| NADH dehydrogenase (ubiquinone) 1 beta subcomplex 3 (predicted)                                                        | Ndufb3_predicted       | 31.6±4.03   |
| NADH dehydrogenase (ubiquinone) 1 beta subcomplex 4                                                                    | Ndufb4                 | 43.34±3.32  |
| NADH dehydrogenase (ubiquinone) 1 beta subcomplex, 11 (predicted)                                                      | Ndufb11_predicted      | 31.97±0.24  |
| NADH dehydrogenase (ubiquinone) 1 beta subcomplex, 2 (predicted)                                                       | Ndufb2_predicted       | 18.65±2.49  |
| NADH dehydrogenase (ubiquinone) 1 beta subcomplex, 5 (predicted)                                                       | Ndufb5_predicted       | 39.9±9.7    |
| NADH dehydrogenase (ubiquinone) 1 beta subcomplex, 6 (predicted)                                                       | Ndufb6_predicted       | 24.14±5.96  |
| NADH dehydrogenase (ubiquinone) 1 beta subcomplex, 7 (predicted)                                                       | Ndufb7_predicted       | 20.76±3.95  |
| NADH dehydrogenase (ubiquinone) 1 beta subcomplex, 9 (predicted)                                                       | Ndufb9_predicted       | 58.85±2.57  |
| NADH dehydrogenase (ubiquinone) 1, alpha                                                                               | LOC683884 /// Ndufab1  | 25.94±4.5   |
| NADH dehydrogenase (ubiquinone) 1, subcomplex unknown, 1                                                               | Ndufc1                 | 20.45±5.64  |
| NADH dehydrogenase (ubiquinone) 1, subcomplex unknown, 2                                                               | Ndufc2                 | 28.05±5.36  |
| NADH dehydrogenase (ubiquinone) Fe-S protein 1                                                                         | Ndufs1                 | 24.8±5.35   |
| NADH dehydrogenase (ubiquinone) Fe-S protein 2                                                                         | Ndufs2                 | 27.01±3.83  |
| NADH dehydrogenase (ubiquinone) Fe-S protein 3 (predicted)                                                             | Ndufs3_predicted       | 24.64±3.84  |
| NADH dehydrogenase (ubiquinone) Fe-S protein 4                                                                         | Ndufs4                 | 4.15±0.8    |
| NADH dehydrogenase (ubiquinone) Fe-S protein 5                                                                         | Ndufs5                 | 30.21±3.33  |
| NADH dehydrogenase (ubiquinone) Fe-S protein 6                                                                         | LOC679739 /// LOC692   | 32.69±2.19  |
| NADH dehydrogenase (ubiquinone) Fe-S protein 7                                                                         | Ndufs7                 | 15.11±0.57  |
| NADH dehydrogenase (ubiquinone) Fe-S protein 8 (predicted)                                                             | Ndufs8_predicted       | 20.32±3.76  |
| NADH dehydrogenase (ubiquinone) flavoprotein 1                                                                         | Ndufv1                 | 24.46±4.38  |
| NADH dehydrogenase (ubiquinone) flavoprotein 2                                                                         | Ndufv2                 | 37.86±0.37  |
| NADH dehydrogenase (ubiquinone) flavoprotein 3-like                                                                    | LOC682566 /// Ndufv3l  | 12.75±1.76  |
| NADH dehydrogenase subunit 1                                                                                           | ND1                    | 80.95±11.21 |
| NADH dehydrogenase subunit 2                                                                                           | ND2                    | 98.79±11.92 |
| NADH dehydrogenase subunit 3                                                                                           | ND3                    | 62.8±6.7    |
| nardilysin, N-arginine dibasic convertase, NRD convertase 1                                                            | Nrd1                   | 2.83±0.1    |
| nasal embryonic LHRH factor                                                                                            | Nelf                   | 0.37±0.16   |
| nascent-polypeptide-associated complex alpha polypeptide (predicted)                                                   | Naca_predicted         | 19.18±0.38  |
| NAT9                                                                                                                   | Nat9                   | 0.84±0.31   |
| NCK interacting protein with SH3 domain (predicted)                                                                    | Nckipsd_predicted      | 0.5±0.15    |
| NCK-associated protein 1                                                                                               | Nckap1                 | 16.04±4.07  |
| N-deacetylase/N-sulfotransferase (heparan glucosaminyl) 1                                                              | Ndst1                  | 2.08±0.24   |
| N-deacetylase/N-sulfotransferase (heparan glucosaminyl) 2 (predicted)                                                  | Ndst2_predicted        | 1.08±0.47   |
| NECAP endocytosis associated 1                                                                                         | Necap1                 | 1.34±0.09   |
| NECAP endocytosis associated 2                                                                                         | Necap2                 | 3.72±0.5    |

|                                                                                    |                    |            |
|------------------------------------------------------------------------------------|--------------------|------------|
| necdin-like 2                                                                      | Ndn12              | 0.65±0.26  |
| Nedd4 binding protein 1                                                            | N4bp1              | 0.31±0.08  |
| NEDD4 binding protein 2-like 2                                                     | N4bp2l2            | 3.42±0.37  |
| Nedd4 family interacting protein 1                                                 | Ndfip1             | 13.2±0.3   |
| Nedd4 family interacting protein 2 (predicted)                                     | Ndfip2_predicted   | 6.25±4.82  |
| NEDD8 ultimate buster-1                                                            | Nub1               | 2.6±0.6    |
| NEFA-interacting nuclear protein NIP30                                             | Nip30              | 2.51±0.26  |
| nei endonuclease VIII-like 1 (E. coli)                                             | Neil1              | 0.99±0.19  |
| neighbor of Brca1 gene 1                                                           | Nbr1               | 4.16±0.97  |
| neighbor of Brca1 gene 1 /// similar to neighbor of Brca1 gene 1                   | LOC498369 /// Nbr1 | 0.65±0.2   |
| nemo like kinase                                                                   | Nlk                | 0.97±0.01  |
| neogenin                                                                           | Neo1               | 0.93±0.74  |
| nephronophthisis 1 (juvenile) homolog (human) (predicted)                          | Nphp1_predicted    | 3.31±0.41  |
| nerve growth factor receptor (TNFRSF16) associated protein 1                       | Ngfrap1            | 15.5±2.46  |
| N-ethylmaleimide sensitive fusion protein                                          | Nsf                | 0.48±0.08  |
| N-ethylmaleimide sensitive fusion protein attachment protein alpha                 | Napa               | 4.06±0.37  |
| N-ethylmaleimide sensitive fusion protein attachment protein gamma                 | Napg               | 3.8±1.37   |
| neural precursor cell expressed, developmentally down-regulated gene 1 (predicted) | Nedd1_predicted    | 0.28±0.21  |
| neural precursor cell expressed, developmentally down-regulated gene 4             | Nedd4              | 9.71±0.66  |
| neural precursor cell expressed, developmentally down-regulated gene 4-like        | Nedd4l             | 2.25±0.35  |
| neural precursor cell expressed, developmentally down-regulated gene 8             | Nedd8              | 14.13±2.54 |
| neural precursor cell expressed, developmentally down-regulated gene 9             | Nedd9              | 2.61±0.82  |
| neural proliferation, differentiation and control, 1                               | Npdc1              | 4.13±0.4   |
| neuraminidase 1                                                                    | Neu1               | 0.58±0.03  |
| neuraminidase 3                                                                    | Neu3               | 0.26±0.14  |
| neuregulin 1                                                                       | Nrg1               | 0.44±0.2   |
| neurobeachin-like 2 (predicted)                                                    | Nbeal2_predicted   | 0.22±0.09  |
| neuroblastoma ras oncogene                                                         | Nras               | 0.83±0.42  |
| neuroblastoma, suppression of tumorigenicity 1                                     | Nbl1               | 0.82±0.22  |
| neurocalcin delta                                                                  | Ncald              | 0.92±0.09  |
| neurochondrin                                                                      | Ncdn               | 0.38±0.16  |
| neuroepithelial cell transforming gene 1                                           | Net1               | 1.59±0.41  |
| neurofibromatosis 2                                                                | Nf2                | 3.92±0.04  |
| neuroguidin, EIF4E binding protein                                                 | Ngdn               | 1.39±0.05  |
| neurolysin (metallopeptidase M3 family)                                            | Nln                | 0.38±0.03  |
| neuromedin B (predicted)                                                           | Nmb_predicted      | 0.65±0.1   |
| neuronal PAS domain protein 2 (predicted)                                          | Npas2_predicted    | 0.38±0.15  |
| neuronal pentraxin 1                                                               | Nptx1              | 0.33±0.18  |
| Neuronal regeneration related protein                                              | Nrep               | 11.97±3.53 |
| neuropilin (NRP) and tolloid (TLL)-like 2 (predicted)                              | Neto2_predicted    | 7.65±0.86  |
| Neuropilin 1                                                                       | Nrp1               | 6.07±1.73  |
| neuroplastin                                                                       | Nptn               | 20.34±0.65 |
| neurotrophin receptor associated death domain                                      | Nradd              | 0.42±0.22  |
| neurturin                                                                          | Nrtn               | 2.59±0.39  |
| neutral sphingomyelinase (N-SMase) activation associated factor                    | Nsmaf              | 1.26±0.04  |
| NFKB inhibitor interacting Ras-like protein 1 (predicted)                          | Nkiras1_predicted  | 0.49±0.05  |
| NFKB inhibitor interacting Ras-like protein 2 (predicted)                          | Nkiras2_predicted  | 1.23±0.03  |
| NFU1 iron-sulfur cluster scaffold homolog (S. cerevisiae)                          | Nfu1               | 2.07±0.54  |
| Ngfi-A binding protein 1                                                           | Nab1               | 3.3±0.46   |
| Ngfi-A binding protein 2                                                           | Nab2               | 1.2±0.11   |
| Ngg1 interacting factor 3-like 1 (S. pombe)                                        | Nif3l1             | 1.56±0.18  |
| N-glycanase 1                                                                      | Ngly1              | 4.44±2.06  |
| NHL repeat containing 3                                                            | Nhlrc3             | 1.56±0.09  |
| nibrin                                                                             | Nbn                | 2.09±0.06  |
| nicalin homolog (zebrafish)                                                        | Ncln               | 1.8±0.91   |
| nicastrin                                                                          | Ncstn              | 2.05±0.39  |
| nicolin 1                                                                          | Nicn1              | 1.97±0.48  |
| nicotinamide nucleotide adenylyltransferase 1                                      | Nmnat1             | 1.1±0.23   |
| nicotinamide nucleotide adenylyltransferase 3                                      | Nmnat3             | 0.99±0.24  |
| nicotinamide nucleotide transhydrogenase                                           | Nnt                | 38.42±0.29 |
| nicotinate phosphoribosyltransferase domain containing 1                           | Naprt1             | 2.45±0.05  |
| Nidogen 1                                                                          | Nid1               | 15.88±0.8  |
| Niemann Pick type C2                                                               | Npc2               | 8.61±1.66  |
| NIK and IKK(beta) binding protein                                                  | Nibp               | 0.67±0.01  |
| NIMA (never in mitosis gene a)- related kinase 9 (predicted)                       | Nek9_predicted     | 5.63±0.6   |
| NIMA (never in mitosis gene a)-related expressed kinase 1 (predicted)              | Nek1_predicted     | 0.62±0.17  |
| NIMA (never in mitosis gene a)-related expressed kinase 3 (predicted)              | Nek3_predicted     | 1.79±0.62  |
| NIMA (never in mitosis gene a)-related expressed kinase 4                          | Nek4               | 0.27±0.09  |
| NIMA (never in mitosis gene a)-related expressed kinase 7                          | Nek7               | 10.08±0.84 |
| NIN1/RPN12 binding protein 1 homolog (S. cerevisiae)                               | Nob1               | 1.29±0.09  |
| ninein (predicted)                                                                 | Nin_predicted      | 0.32±0.1   |
| ninein-like                                                                        | Nip                | 4.43±0.14  |
| ninjurin 1                                                                         | Ninj1              | 15.37±5.33 |
| NIPA-like domain containing 2                                                      | Npal2              | 5.39±0.59  |
| Nipped-B homolog (Drosophila)                                                      | NIPBL              | 1.77±0.63  |
| nischarin                                                                          | Nisch              | 4.67±0.61  |
| nitric oxide synthase 1 (neuronal) adaptor protein                                 | Nos1ap             | 0.64±0.44  |
| nitric oxide synthase interacting protein (predicted)                              | Nosip_predicted    | 1.66±0.02  |
| nitrilase 1                                                                        | Nit1               | 4.78±0.83  |
| nitrilase family, member 2                                                         | Nit2               | 9.22±0.43  |
| nitrogen fixation gene 1 (S. cerevisiae)                                           | Nfs1               | 4.44±0.64  |
| NLR family member X1                                                               | NlrX1              | 1.12±0.37  |
| NMD3 homolog (S. cerevisiae) (predicted)                                           | Nmd3_predicted     | 2.34±0.59  |
| NMDA receptor-regulated gene 1 (predicted)                                         | Narg1_predicted    | 3.35±0.97  |
| N-methylpurine-DNA glycosylase                                                     | Mpg                | 0.73±0.1   |
| NmrA-like family domain containing 1                                               | Nmral1             | 0.57±0.02  |
| N-myc (and STAT) interactor                                                        | Nmi                | 0.5±0.31   |

|                                                                                                                             |                     |            |
|-----------------------------------------------------------------------------------------------------------------------------|---------------------|------------|
| N-myc downstream regulated gene 2                                                                                           | Ndrg2               | 14.62±1.19 |
| N-myc downstream regulated gene 3                                                                                           | Ndrg3               | 5.59±1.31  |
| N-myc downstream regulated gene 4                                                                                           | Ndrg4               | 17.25±1.51 |
| N-myristoyltransferase 1                                                                                                    | Nmt1                | 2.04±0.2   |
| nodal modulator 1                                                                                                           | Nomo1               | 1.73±0.14  |
| NOL1/NOP2/Sun domain family, member 2                                                                                       | Nsun2               | 1.47±0.05  |
| NOL1/NOP2/Sun domain family, member 4 (predicted)                                                                           | Nsun4_predicted     | 1.48±0.15  |
| NOL1/NOP2/Sun domain family, member 5 (predicted)                                                                           | Nsun5_predicted     | 1.22±0     |
| non imprinted in Prader-Willi/Angelman syndrome 2 homolog (human) (predicted)                                               | Nipa2_predicted     | 2.66±0.69  |
| non-catalytic region of tyrosine kinase adaptor protein 1 (predicted)                                                       | Nck1_predicted      | 2.77±0.67  |
| non-catalytic region of tyrosine kinase adaptor protein 2 (predicted)                                                       | Nck2_predicted      | 1.72±0.18  |
| non-metastatic cells 3, protein expressed in                                                                                | Nme3                | 1.69±0.37  |
| non-metastatic cells 6, protein expressed in (nucleoside-diphosphate kinase)                                                | Nme6                | 0.63±0.02  |
| non-POU-domain-containing, octamer-binding protein                                                                          | Nono                | 8.75±0.62  |
| non-SMC condensin I complex, subunit D2                                                                                     | Ncapd2              | 0.64±0.16  |
| non-SMC condensin I complex, subunit H                                                                                      | Ncaph               | 0.9±0.05   |
| non-SMC condensin II complex, subunit D3                                                                                    | Ncapd3              | 0.76±0     |
| non-SMC condensin II complex, subunit H2                                                                                    | Ncaph2              | 1.16±0.15  |
| non-SMC element 1 homolog (S. cerevisiae)                                                                                   | Nsmce1              | 2.45±0.08  |
| non-SMC element 2, MMS21 homolog (S. cerevisiae)                                                                            | Nsmce2              | 1.53±0.39  |
| non-SMC element 4 homolog A (S. cerevisiae)                                                                                 | Nsmce4a             | 4.26±0.5   |
| Notch gene homolog 1 (Drosophila)                                                                                           | Notch1              | 0.48±0.2   |
| Notch gene homolog 2 (Drosophila)                                                                                           | Notch2              | 4.19±0.54  |
| Notch gene homolog 3 (Drosophila)                                                                                           | Notch3              | 0.31±0.22  |
| notch1-induced protein                                                                                                      | LOC493574           | 1.15±0.56  |
| notchless homolog 1 (Drosophila) (predicted)                                                                                | Nle1_predicted      | 0.41±0.11  |
| NS5A (hepatitis C virus) transactivated protein 9                                                                           | Ns5atp9             | 0.98±0.07  |
| NSFL1 (p97) cofactor (p47)                                                                                                  | Nsf11c              | 2.89±0.02  |
| N-terminal asparagine amidase                                                                                               | Ntan1               | 5.01±0.06  |
| NTF2-related export protein 1 (predicted)                                                                                   | Nxt1_predicted      | 1.84±0.09  |
| nth (endonuclease III)-like 1 (E.coli) (predicted)                                                                          | Nthl1_predicted     | 0.63±0     |
| NUAK family, SNF1-like kinase, 2                                                                                            | Nuak2               | 10.13±4.62 |
| nuclear autoantigenic sperm protein (histone-binding)                                                                       | Nasp                | 0.9±0.37   |
| nuclear cap binding protein subunit 1, 80kDa                                                                                | Ncbp1               | 1.57±0.14  |
| nuclear casein kinase and cyclin-dependent kinase substrate 1                                                               | Nucks1              | 1.97±0.22  |
| nuclear distribution gene C homolog (Aspergillus)                                                                           | Nudc                | 3.19±0.3   |
| nuclear distribution gene E homolog 1 (A nidulans)                                                                          | Nde1                | 1.52±0.23  |
| nuclear distribution gene E-like homolog 1 (A. nidulans)                                                                    | Ndel1               | 0.37±0.3   |
| nuclear factor I/A                                                                                                          | Nfia                | 1.85±0.59  |
| nuclear factor I/B                                                                                                          | Nfib                | 3.82±0.44  |
| Nuclear factor I/C                                                                                                          | Nfic                | 2.11±0.03  |
| nuclear factor I/X                                                                                                          | Nfix                | 1.9±0.24   |
| nuclear factor of activated T-cells 5 (predicted)                                                                           | Nfat5_predicted     | 5.06±4.97  |
| nuclear factor of activated T-cells, cytoplasmic, calcineurin-dependent 3 (predicted)                                       | Nfatc3_predicted    | 1.67±0.42  |
| nuclear factor of kappa light chain gene enhancer in B-cells inhibitor, beta                                                | Nfkib               | 0.93±0.12  |
| nuclear factor of kappa light polypeptide gene enhancer in B-cells 1, p105                                                  | Nfkb1               | 2.28±0.72  |
| nuclear factor of kappa light polypeptide gene enhancer in B-cells inhibitor-like 1                                         | Nfkbil1             | 0.67±0.11  |
| nuclear factor related to kappa B binding protein (predicted)                                                               | Nfrkb_predicted     | 1.16±0.27  |
| nuclear factor, erythroid derived 2, like 2                                                                                 | Nfe2l2              | 4.17±0.67  |
| nuclear factor, erythroid derived 2,-like 1 (predicted)                                                                     | Nfe2l1_predicted    | 4.72±1.07  |
| nuclear factor, interleukin 3 regulated                                                                                     | Nfil3               | 2.13±0.39  |
| nuclear fragile X mental retardation protein interacting protein 1                                                          | Nufip1              | 2.52±0.57  |
| nuclear import 7 homolog (S. cerevisiae)                                                                                    | Nip7                | 0.74±0.32  |
| nuclear mitotic apparatus protein 1                                                                                         | Numa1               | 2.32±0.52  |
| nuclear pore associated protein                                                                                             | Npap60              | 0.29±0.01  |
| nuclear pore membrane protein 121                                                                                           | Pom121              | 0.96±0.15  |
| nuclear prelamin A recognition factor                                                                                       | Narf                | 2.16±0.78  |
| nuclear prelamin A recognition factor-like                                                                                  | Narf1               | 1.86±0.51  |
| nuclear protein 1                                                                                                           | Nupr1               | 10.5±2.29  |
| nuclear protein E3-3                                                                                                        | RGD708545           | 3.35±0.65  |
| nuclear protein in the AT region (predicted)                                                                                | Npat_predicted      | 0.49±0.21  |
| nuclear protein localization 4 homolog (S. cerevisiae)                                                                      | Nploc4              | 1.11±0.16  |
| nuclear receptor binding factor 2                                                                                           | Nrbf2               | 1.32±0.03  |
| nuclear receptor binding protein                                                                                            | Nrbp                | 0.76±0.32  |
| Nuclear receptor binding SET domain protein 1 (predicted)                                                                   | Nsd1_predicted      | 2.61±0.19  |
| nuclear receptor coactivator 1 (predicted)                                                                                  | Ncoa1_predicted     | 4.53±1.08  |
| nuclear receptor coactivator 3                                                                                              | Ncoa3               | 0.47±0.08  |
| nuclear receptor coactivator 4 (predicted)                                                                                  | Ncoa4_predicted     | 11.21±1.51 |
| nuclear receptor coactivator 5 (predicted)                                                                                  | Ncoa5_predicted     | 0.85±0.18  |
| nuclear receptor coactivator 6                                                                                              | Ncoa6               | 1.53±0.3   |
| nuclear receptor coactivator 7                                                                                              | Ncoa7               | 4.35±0.12  |
| nuclear receptor co-repressor 1                                                                                             | Ncor1               | 5.88±0.43  |
| nuclear receptor co-repressor 2 (predicted)                                                                                 | Ncor2_predicted     | 3.12±0.85  |
| nuclear receptor subfamily 0, group B, member 2                                                                             | Nr0b2               | 4.21±1.02  |
| nuclear receptor subfamily 1, group D, member 1                                                                             | Nr1d1               | 0.42±0.96  |
| nuclear receptor subfamily 1, group D, member 2                                                                             | Nr1d2               | 1.29±1.08  |
| nuclear receptor subfamily 1, group H, member 2                                                                             | Nr1h2               | 2±0.43     |
| nuclear receptor subfamily 1, group H, member 3                                                                             | Nr1h3               | 0.4±0.15   |
| nuclear receptor subfamily 1, group H, member 4                                                                             | Nr1h4               | 2.07±0.37  |
| nuclear receptor subfamily 2, group F, member 2                                                                             | Nr2f2               | 4.97±0.06  |
| nuclear receptor subfamily 2, group F, member 6                                                                             | Nr2f6               | 4.52±0.06  |
| nuclear receptor subfamily 2, group F, member 6 /// similar to Orphan nuclear receptor EAR-2 (V-erbA-related protein EAR-2) | LOC688367 /// Nr2f6 | 1.03±0.49  |
| nuclear receptor subfamily 3, group C, member 1                                                                             | Nr3c1               | 2.44±0.76  |
| nuclear receptor subfamily 3, group C, member 2                                                                             | Nr3c2               | 2.26±0.66  |
| nuclear receptor subfamily 4, group A, member 2                                                                             | Nr4a2               | 0.29±0.2   |
| nuclear RNA export factor 1                                                                                                 | Nxf1                | 4.66±0.85  |
| nuclear transcription factor, X-box binding 1                                                                               | Nfx1                | 0.62±0.35  |

|                                                                                                                          |                    |            |
|--------------------------------------------------------------------------------------------------------------------------|--------------------|------------|
| nuclear transcription factor-Y beta                                                                                      | Nfyb               | 1.26±0.27  |
| nuclear transcription factor-Y gamma                                                                                     | Nfyc               | 9.37±1.11  |
| nuclear transport factor 2                                                                                               | Nutf2              | 4.29±1.48  |
| nuclear transport factor 2-like export factor 2 (predicted)                                                              | Nxt2_predicted     | 0.65±0.01  |
| nuclear undecaprenyl pyrophosphate synthase 1 homolog (S. cerevisiae)                                                    | Nus1               | 1.22±0.29  |
| nuclear VCP-like (predicted)                                                                                             | Nvl_predicted      | 0.53±0.32  |
| nucleobindin 1                                                                                                           | Nucb1              | 7.39±0.12  |
| nucleolar and coiled-body phosphoprotein 1                                                                               | Nolc1              | 0.7±0.06   |
| nucleolar and spindle associated protein 1 (predicted)                                                                   | Nusap1_predicted   | 1.18±0.02  |
| nucleolar complex associated 4 homolog (S. cerevisiae)                                                                   | Noc4l              | 0.94±0.17  |
| nucleolar protein 1 (predicted)                                                                                          | Nol1_predicted     | 0.9±0.11   |
| nucleolar protein 10                                                                                                     | Nol10              | 0.79±0.02  |
| nucleolar protein 14                                                                                                     | Nol14              | 0.77±0.4   |
| nucleolar protein 5                                                                                                      | Nol5               | 1.83±0.07  |
| nucleolar protein 5A                                                                                                     | Nol5a              | 0.89±0.26  |
| nucleolar protein 7                                                                                                      | Nol7               | 3.15±1.04  |
| nucleolar protein 8 (predicted)                                                                                          | Nol8_predicted     | 0.29±0.11  |
| nucleolar protein 9                                                                                                      | Nol9               | 0.77±0.29  |
| nucleolar protein family 6 (RNA-associated) (predicted)                                                                  | Nol6_predicted     | 0.98±0.11  |
| nucleolar protein family A, member 1 (H/ACA small nucleolar RNPs)                                                        | Nola1              | 1.07±0.27  |
| nucleolar protein family A, member 2 (predicted)                                                                         | Nola2_predicted    | 2.03±0.35  |
| nucleolar protein family A, member 3                                                                                     | Nola3              | 14.12±3.15 |
| nucleolin                                                                                                                | Ncl                | 9.16±0.15  |
| nucleophosmin 1                                                                                                          | Npm1               | 8.52±0.52  |
| nucleophosmin 1 /// similar to Nucleophosmin (NPM) (Nucleolar phosphoprotein B23) (Numatrin) (Nucleolar protein NO38)    | LOC300303 /// Npm1 | 0.64±0.21  |
| nucleoporin 133 (predicted)                                                                                              | Nup133_predicted   | 0.29±0.13  |
| nucleoporin 153                                                                                                          | Nup153             | 2.87±0.74  |
| nucleoporin 155                                                                                                          | Nup155             | 1±0.14     |
| nucleoporin 160 (predicted)                                                                                              | Nup160_predicted   | 0.91±0.01  |
| nucleoporin 188                                                                                                          | Nup188             | 0.41±0.17  |
| nucleoporin 205                                                                                                          | Nup205             | 0.94±0.4   |
| nucleoporin 210                                                                                                          | Nup210             | 0.42±0.18  |
| nucleoporin 214                                                                                                          | Nup214             | 0.72±0.3   |
| nucleoporin 35                                                                                                           | Nup35              | 1.19±0.42  |
| nucleoporin 37 (predicted)                                                                                               | Nup37_predicted    | 2.1±0.32   |
| nucleoporin 54                                                                                                           | Nup54              | 0.86±0.15  |
| nucleoporin 62                                                                                                           | Nup62              | 1.33±0.26  |
| nucleoporin 85                                                                                                           | Nup85              | 0.39±0.02  |
| nucleoporin 88                                                                                                           | Nup88              | 1.75±0.42  |
| nucleoporin 93                                                                                                           | Nup93              | 3.15±0.68  |
| nucleoporin 98                                                                                                           | Nup98              | 1.28±0.06  |
| nucleoporin like 1                                                                                                       | Nupl1              | 0.96±0.03  |
| nucleoporin like 2                                                                                                       | Nupl2              | 0.45±0.11  |
| nucleoredoxin (predicted)                                                                                                | Nxn_predicted      | 0.56±0.15  |
| nucleoside phosphorylase                                                                                                 | Np                 | 6.86±1.05  |
| Nucleosome assembly protein 1-like 1                                                                                     | Nap111             | 1.83±0.95  |
| nucleosome assembly protein 1-like 3                                                                                     | Nap113             | 0.76±0.41  |
| nucleosome assembly protein 1-like 4                                                                                     | Nap114             | 3.32±0.87  |
| nucleotide binding protein 1                                                                                             | Nubp1              | 5.17±0.57  |
| nucleotide binding protein 2                                                                                             | Nubp2              | 3.64±0.49  |
| nucleotide binding protein-like (predicted)                                                                              | Nubpl_predicted    | 0.58±0.2   |
| nucleotide-binding oligomerization domain containing 1                                                                   | Nod1               | 0.81±0.01  |
| NudC domain containing 1 (predicted)                                                                                     | Nudcd1_predicted   | 0.57±0.27  |
| NudC domain containing 2                                                                                                 | Nudcd2             | 0.87±0.37  |
| nudix (nucleoside diphosphate linked moiety X)-type motif 1                                                              | Nudt1              | 0.49±0.17  |
| nudix (nucleoside diphosphate linked moiety X)-type motif 12 (predicted)                                                 | Nudt12_predicted   | 0.29±0.1   |
| nudix (nucleoside diphosphate linked moiety X)-type motif 14 (predicted)                                                 | Nudt14_predicted   | 1.48±0.91  |
| nudix (nucleoside diphosphate linked moiety X)-type motif 16 (predicted)                                                 | Nudt16_predicted   | 1.72±0.17  |
| nudix (nucleoside diphosphate linked moiety X)-type motif 16-like 1                                                      | Nudt16l1           | 2.06±0.04  |
| nudix (nucleoside diphosphate linked moiety X)-type motif 19                                                             | Nudt19             | 1.98±0.53  |
| nudix (nucleoside diphosphate linked moiety X)-type motif 2                                                              | Nudt2              | 4.65±0.45  |
| nudix (nucleoside diphosphate linked moiety X)-type motif 22                                                             | Nudt22             | 0.88±0.15  |
| nudix (nucleoside diphosphate linked moiety X)-type motif 4                                                              | Nudt4              | 24.57±0.15 |
| nudix (nucleoside diphosphate linked moiety X)-type motif 5                                                              | Nudt5              | 0.72±0.2   |
| nudix (nucleoside diphosphate linked moiety X)-type motif 6                                                              | Nudt6              | 0.71±0.2   |
| nudix (nucleoside diphosphate linked moiety X)-type motif 7 (predicted)                                                  | Nudt7_predicted    | 8.12±2.25  |
| nudix (nucleoside diphosphate linked moiety X)-type motif 9                                                              | Nudt9              | 1.55±0.45  |
| nudix (nucleotide diphosphate linked moiety X)-type motif 3                                                              | Nudt3              | 4.28±0.22  |
| NUF2, NDC80 kinetochore complex component, homolog (S. cerevisiae)                                                       | Nuf2               | 0.61±0.02  |
| Numb gene homolog (Drosophila)                                                                                           | Numb               | 3.67±0.23  |
| Nur77 downstream gene 2                                                                                                  | Ndg2               | 51.62±2.76 |
| nurim (nuclear envelope membrane protein)                                                                                | Nrm                | 0.43±0.03  |
| O-6-methylguanine-DNA methyltransferase                                                                                  | Mgmt               | 0.43±0.09  |
| OAF homolog (Drosophila)                                                                                                 | Oaf                | 1.29±0.65  |
| Obq-like ATPase 1                                                                                                        | Ola1               | 7.56±2.42  |
| obscurin-like 1                                                                                                          | Obs1               | 0.8±0.15   |
| occludin /// thiopurine methyltransferase                                                                                | Ocln /// Tpm1      | 23.9±5.4   |
| OCIA domain containing 1                                                                                                 | Ociad1             | 13.1±0.82  |
| oculocerebrorenal syndrome of Lowe                                                                                       | Ocrl               | 0.63±0.13  |
| oligonucleotide/oligosaccharide-binding fold containing 1                                                                | Obfc1              | 1.12±0.03  |
| oligonucleotide/oligosaccharide-binding fold containing 2A                                                               | Obfc2a             | 0.36±0.16  |
| oligonucleotide/oligosaccharide-binding fold containing 2B                                                               | Obfc2b             | 1.9±0.26   |
| oligophrenin 1 (predicted)                                                                                               | Ophn1_predicted    | 1.37±0.21  |
| O-linked N-acetylglucosamine (GlcNAc) transferase (UDP-N-acetylglucosamine:polypeptide-N-acetylglucosaminyl transferase) | Ogt                | 8.84±1.45  |
| OMA1 homolog, zinc metallopeptidase (S. cerevisiae) (predicted)                                                          | Oma1_predicted     | 1.73±0.27  |
| open reading frame 19                                                                                                    | ORF19              | 1.59±0.08  |
| opioid growth factor receptor                                                                                            | Ogfr               | 1.43±0.02  |

|                                                                                    |                      |            |
|------------------------------------------------------------------------------------|----------------------|------------|
| opioid receptor, sigma 1                                                           | Oprs1                | 1.06±0.27  |
| opsin 3                                                                            | Opn3                 | 1.21±0.25  |
| optic atrophy 1 homolog (human)                                                    | Opa1                 | 1.53±0.49  |
| optic atrophy 3                                                                    | Opa3                 | 0.53±0.3   |
| optineurin                                                                         | Optn                 | 4.12±0.2   |
| ORAI calcium release-activated calcium modulator 1                                 | Orai1                | 1.42±0.06  |
| ORAI calcium release-activated calcium modulator 3                                 | Orai3                | 0.65±0.29  |
| ORAI calcium release-activated calcium modulator 3 /// similar to KIAA0339 protein | Orai3 /// RGD1311624 | 0.54±0.05  |
| oral cancer overexpressed 1 (predicted)                                            | Oraov1_predicted     | 0.58±0.14  |
| oral-facial-digital syndrome 1 gene homolog (human)                                | Odf1                 | 0.43±0.05  |
| origin recognition complex, subunit 2-like (S. cerevisiae)                         | Orc2l                | 1.51±0.01  |
| origin recognition complex, subunit 3-like (S. cerevisiae)                         | Orc3l                | 0.29±0.04  |
| origin recognition complex, subunit 4                                              | Orc4                 | 3±0.26     |
| origin recognition complex, subunit 4-like (S. cerevisiae)                         | Orc4l                | 1.01±0.51  |
| origin recognition complex, subunit 5-like (S. cerevisiae)                         | Orc5l                | 1.45±0.13  |
| origin recognition complex, subunit 6-like (S. cerevisiae)                         | Orc6l                | 0.23±0.04  |
| ORM1-like 2 (S. cerevisiae) (predicted)                                            | Ormdl2_predicted     | 3.77±0.5   |
| ORM1-like 3 (S. cerevisiae)                                                        | Ormdl3               | 3.15±0.2   |
| ornithine decarboxylase 1                                                          | Odc1                 | 1.25±3.36  |
| ornithine decarboxylase antizyme 1                                                 | Oaz1                 | 22.16±1.06 |
| O-sialoglycoprotein endopeptidase                                                  | Osgep                | 0.6±0.19   |
| O-sialoglycoprotein endopeptidase-like 1                                           | Osgepl1              | 0.8±0.19   |
| osteoclast stimulating factor 1                                                    | Ostf1                | 4.28±0.02  |
| osteopetrosis associated transmembrane protein 1                                   | Ostm1                | 2.51±0.57  |
| OTU domain containing 1                                                            | Otud1                | 2.19±0.28  |
| OTU domain containing 5                                                            | Otud5                | 2.79±0.55  |
| OTU domain containing 7B                                                           | Otud7b               | 0.38±0.18  |
| OTU domain containing 7B /// myotubularin related protein 11                       | Mtmr11 /// Otud7b    | 1.34±0.1   |
| OTU domain, ubiquitin aldehyde binding 1 (predicted)                               | Otub1_predicted      | 3.91±1.25  |
| OTU domain, ubiquitin aldehyde binding 2 (predicted)                               | Otub2_predicted      | 0.42±0.26  |
| outer dense fiber of sperm tails 2                                                 | Odf2                 | 0.23±0.09  |
| outer dense fiber of sperm tails 2-like                                            | Odf2l                | 0.97±0.22  |
| oxidase assembly 1-like                                                            | Oxa1l                | 9.68±0.88  |
| oxidation resistance 1                                                             | Oxr1                 | 5.25±0.23  |
| oxidative stress responsive gene                                                   | RGD1303142           | 1.23±0.52  |
| oxidative-stress responsive 1 (predicted)                                          | Oxsr1_predicted      | 1.78±0.03  |
| oxidoreductase NAD-binding domain containing 1 (predicted)                         | Oxnad1_predicted     | 2.66±0.3   |
| oxoglutarate dehydrogenase (lipoamide)                                             | Oqdh                 | 27.73±4.32 |
| oxysterol binding protein (predicted)                                              | Osbp_predicted       | 7.32±2.1   |
| oxysterol binding protein-like 11 (predicted)                                      | Osbpl11_predicted    | 0.86±0.15  |
| oxysterol binding protein-like 1A                                                  | Osbpl1a              | 4.09±0.9   |
| oxysterol binding protein-like 2                                                   | Osbpl2               | 4.49±0.13  |
| oxysterol binding protein-like 3                                                   | Osbpl3               | 2.26±0.4   |
| oxysterol binding protein-like 6 (predicted)                                       | Osbpl6_predicted     | 0.42±0.06  |
| oxysterol binding protein-like 7 (predicted)                                       | Osbpl7_predicted     | 0.5±0.02   |
| oxysterol binding protein-like 9 (predicted)                                       | Osbpl9_predicted     | 9.34±2.15  |
| P18SRP protein                                                                     | P18srp               | 1.64±0.43  |
| P21 (CDKN1A)-activated kinase 1                                                    | Pak1                 | 1.19±0.09  |
| p21 (CDKN1A)-activated kinase 4 (predicted)                                        | Pak4_predicted       | 2.9±0.37   |
| p300/CBP-associated factor                                                         | Pcaf                 | 4.18±0.15  |
| p34 protein                                                                        | P34                  | 0.95±0.16  |
| P450 (cytochrome) oxidoreductase                                                   | Por                  | 1.14±0.6   |
| p53 and DNA damage regulated 1                                                     | Pdrg1                | 0.85±0.06  |
| P55                                                                                | LOC362855            | 4.33±0.88  |
| p55 protein                                                                        | LOC652956            | 4.9±0.53   |
| Paf1, RNA polymerase II associated factor, homolog (S. cerevisiae)                 | Paf1                 | 1.97±0.37  |
| paired box gene 8                                                                  | Pax8                 | 5.75±1.73  |
| PAK1 interacting protein 1                                                         | Pak1ip1              | 0.41±0.09  |
| pallidin                                                                           | Pldn                 | 0.99±0.04  |
| palmitoyl-protein thioesterase 1                                                   | Ppt1                 | 3.76±0.75  |
| PAN3 polyA specific ribonuclease subunit homolog (S. cerevisiae)                   | Pan3                 | 3±0.52     |
| Pannexin 1                                                                         | Panx1                | 0.2±0.03   |
| pantothenate kinase 1 (predicted)                                                  | Pank1_predicted      | 5.52±0.13  |
| pantothenate kinase 2 (Hallervorden-Spatz syndrome) (predicted)                    | Pank2_predicted      | 0.65±0.09  |
| pantothenate kinase 4                                                              | Pank4                | 1.91±0.15  |
| PAP associated domain containing 1 (predicted)                                     | Papd1_predicted      | 1.63±0.06  |
| PAP associated domain containing 5 (predicted)                                     | Papd5_predicted      | 1.79±0.44  |
| papillary renal cell carcinoma (translocation-associated) (predicted)              | Prcc_predicted       | 1.04±0.22  |
| par-3 (partitioning defective 3) homolog (C. elegans)                              | Par3                 | 0.58±0.1   |
| par-6 (partitioning defective 6) homolog beta (C. elegans) (predicted)             | Pard6b_predicted     | 6.04±0.01  |
| par-6 (partitioning defective 6,) homolog alpha (C. elegans)                       | Pard6a               | 0.39±0.24  |
| paralemmin                                                                         | Palm                 | 3.25±0.65  |
| paraoxonase 2                                                                      | Pon2                 | 2.81±0.3   |
| paraoxonase 3                                                                      | Pon3                 | 0.99±0.57  |
| paraspeckle protein 1                                                              | Pspc1                | 0.97±0.31  |
| parathyrosin                                                                       | Ptms                 | 7.5±0.84   |
| parathyroid hormone receptor 1                                                     | Pthr1                | 1.36±1.33  |
| Parkinson disease (autosomal recessive, early onset) 7                             | Park7                | 16.14±3.67 |
| partner of NOB1 homolog (S. cerevisiae)                                            | Pno1                 | 0.67±0.46  |
| parvin, alpha                                                                      | Parva                | 1.02±0.36  |
| patatin-like phospholipase domain containing 2 (predicted)                         | Pnpla2_predicted     | 2.98±1.56  |
| patatin-like phospholipase domain containing 7                                     | Pnpla7               | 1.19±0.28  |
| patatin-like phospholipase domain containing 8                                     | Pnpla8               | 0.79±0.74  |
| PAX interacting (with transcription-activation domain) protein 1 (predicted)       | Paxip1_predicted     | 0.65±0.2   |
| paxillin                                                                           | Pxn                  | 3.3±1.23   |
| PC4 and SFRS1 interacting protein 1                                                | Psip1                | 0.84±0.02  |
| PCTAIRE-motif protein kinase 1                                                     | Pctk1                | 2.35±0.21  |

|                                                                                                                                 |                       |            |
|---------------------------------------------------------------------------------------------------------------------------------|-----------------------|------------|
| PCTAIRE-motif protein kinase 2                                                                                                  | Pctk2                 | 0.72±0.46  |
| PDGFA associated protein 1                                                                                                      | Pdap1                 | 6.41±0.88  |
| PDS5, regulator of cohesion maintenance, homolog A (S. cerevisiae)                                                              | Pds5a                 | 2.3±0.39   |
| PDS5, regulator of cohesion maintenance, homolog B (S. cerevisiae)                                                              | Pds5b                 | 0.87±0.16  |
| PDZ and LIM domain 2                                                                                                            | Pdlim2                | 0.43±0.08  |
| PDZ and LIM domain 5                                                                                                            | Pdlim5                | 0.36±0.16  |
| PDZ and LIM domain 7                                                                                                            | Pdlim7                | 0.32±0.12  |
| PDZ binding kinase (predicted)                                                                                                  | Pbk_predicted         | 0.54±0.23  |
| PDZ domain containing 11 (predicted)                                                                                            | Pdzd11_predicted      | 2.9±0.16   |
| PDZ domain containing 8                                                                                                         | Pdzd8                 | 2.11±0.02  |
| PDZK1 interacting protein 1                                                                                                     | Pdzk1ip1              | 5.31±2.62  |
| pecanex homolog (Drosophila)                                                                                                    | Pcnx                  | 2.48±0.12  |
| pecanex-like 3 (Drosophila)                                                                                                     | Pcnx3                 | 2.05±0.04  |
| pellino homolog 1 (Drosophila) /// similar to pellino protein (predicted)                                                       | Peli1 /// RGD1564594_ | 1.01±0.74  |
| pelota homolog (Drosophila)                                                                                                     | Pelo                  | 2.69±0.54  |
| penta-EF hand domain containing 1                                                                                               | Pef1                  | 2.65±0.08  |
| pentatricopeptide repeat domain 1 (predicted)                                                                                   | Ptcd1_predicted       | 1.74±0.49  |
| pentatricopeptide repeat domain 2 (predicted)                                                                                   | Ptcd2_predicted       | 1.27±0.41  |
| Pentatricopeptide repeat domain 3                                                                                               | Ptcd3                 | 4.77±1.19  |
| peptidase (mitochondrial processing) alpha                                                                                      | Pmpca                 | 2.69±0.52  |
| peptidase (mitochondrial processing) beta                                                                                       | Pmpcb                 | 7.46±2.29  |
| peptidylglycine alpha-amidating monooxygenase                                                                                   | Pam                   | 0.3±1.57   |
| peptidylprolyl isomerase (cyclophilin)-like 1                                                                                   | Ppil1                 | 0.76±0.25  |
| peptidylprolyl isomerase (cyclophilin)-like 2                                                                                   | Ppil2                 | 1.22±0.06  |
| peptidylprolyl isomerase (cyclophilin)-like 3                                                                                   | Ppil3                 | 1.29±0.5   |
| peptidylprolyl isomerase (cyclophilin)-like 4 (predicted)                                                                       | Ppil4_predicted       | 1.29±0.33  |
| peptidylprolyl isomerase A                                                                                                      | Ppia                  | 46.66±3.48 |
| peptidylprolyl isomerase B                                                                                                      | Ppib                  | 19.15±1.1  |
| peptidylprolyl isomerase D (cyclophilin D)                                                                                      | Ppid                  | 2.98±0.09  |
| peptidylprolyl isomerase domain and WD repeat containing 1 (predicted)                                                          | Ppwd1_predicted       | 0.34±0.22  |
| peptidylprolyl isomerase E (cyclophilin E)                                                                                      | Ppie                  | 1.41±0.39  |
| peptidylprolyl isomerase F (cyclophilin F)                                                                                      | Ppif                  | 4.97±2     |
| peptidylprolyl isomerase G                                                                                                      | Ppig                  | 0.6±0.16   |
| peptidyl-tRNA hydrolase 1 homolog (S. cerevisiae) (predicted)                                                                   | Pthr1_predicted       | 0.53±0.25  |
| Peptidyl-tRNA hydrolase 1 homolog (S. cerevisiae) (predicted)                                                                   | Tor2a                 | 0.56±0.03  |
| peptidyl-tRNA hydrolase 2                                                                                                       | Pthr2                 | 1.11±0.51  |
| pericentriolar material 1                                                                                                       | Pcm1                  | 1.78±0.13  |
| period homolog 1 (Drosophila)                                                                                                   | Per1                  | 2.18±0.98  |
| period homolog 3 (Drosophila)                                                                                                   | Per3                  | 0.58±0.39  |
| periphilin 1 (predicted)                                                                                                        | Pphln1_predicted      | 1.38±0.06  |
| peroxiredoxin 1                                                                                                                 | Prdx1                 | 12.61±2.14 |
| peroxiredoxin 2                                                                                                                 | Prdx2                 | 30.62±2.49 |
| peroxiredoxin 3                                                                                                                 | Prdx3                 | 12.71±1.74 |
| peroxiredoxin 4                                                                                                                 | Prdx4                 | 3.16±0.57  |
| peroxiredoxin 5                                                                                                                 | Prdx5                 | 38.21±2.99 |
| peroxiredoxin 6                                                                                                                 | Prdx6                 | 5.33±0.72  |
| peroxisomal biogenesis factor 11A                                                                                               | Pex11a                | 0.47±0.27  |
| peroxisomal biogenesis factor 11b                                                                                               | Pex11b                | 3.01±0.34  |
| peroxisomal biogenesis factor 12                                                                                                | Pex12                 | 1.85±0.35  |
| peroxisomal biogenesis factor 13 (predicted)                                                                                    | Pex13_predicted       | 3.7±0.27   |
| peroxisomal biogenesis factor 14                                                                                                | Pex14                 | 1.01±0.18  |
| peroxisomal biogenesis factor 3                                                                                                 | Pex3                  | 1.1±0.25   |
| peroxisomal biogenesis factor 6                                                                                                 | Pex6                  | 0.56±0.07  |
| peroxisomal delta3, delta2-enoyl-Coenzyme A isomerase                                                                           | Peci                  | 6.25±0.86  |
| peroxisomal delta3, delta2-enoyl-Coenzyme A isomerase /// similar to RIKEN cDNA 1810022C23                                      | Peci /// RGD1310224   | 1.54±0.17  |
| peroxisomal membrane protein 2                                                                                                  | Pxmp2                 | 3.13±0.14  |
| peroxisomal membrane protein 4                                                                                                  | Pxmp4                 | 0.47±0.06  |
| peroxisomal trans-2-enoyl-CoA reductase                                                                                         | Pecr                  | 12.95±0.24 |
| peroxisome biogenesis factor 1                                                                                                  | Pex1                  | 1.42±0.2   |
| peroxisome biogenesis factor 10                                                                                                 | Pex10                 | 0.32±0.24  |
| peroxisome biogenesis factor 16                                                                                                 | Pex16                 | 1.13±0     |
| peroxisome biogenesis factor 19                                                                                                 | Pex19                 | 1.5±0.55   |
| peroxisome biogenesis factor 19 /// similar to Peroxisomal biogenesis factor 19 (Peroxin-19) (Peroxisomal farnesylated protein) | LOC679129 /// Pex19   | 3.26±0.53  |
| peroxisome biogenesis factor 2                                                                                                  | Pex2                  | 1.73±0.44  |
| peroxisome biogenesis factor 26                                                                                                 | Pex26                 | 1.49±0.37  |
| peroxisome biogenesis factor 5 (predicted)                                                                                      | Pex5_predicted        | 2.39±0.05  |
| peroxisome biogenesis factor 7                                                                                                  | Pex7                  | 2.48±0.12  |
| peroxisome proliferative activated receptor, gamma, coactivator 1 alpha                                                         | Ppargc1a              | 3.63±0.35  |
| peroxisome proliferative activated receptor, gamma, coactivator 1 beta                                                          | Ppargc1b              | 1.54±0.23  |
| PEST proteolytic signal containing nuclear protein                                                                              | Pcnp                  | 6.18±1.17  |
| PET112-like (yeast) (predicted)                                                                                                 | Pet112l_predicted     | 0.63±0.29  |
| peter pan homolog (Drosophila)                                                                                                  | Ppan                  | 0.74±0.34  |
| PFTAIRE protein kinase 1 (predicted)                                                                                            | Pftk1_predicted       | 0.72±0.17  |
| PH domain and leucine rich repeat protein phosphatase                                                                           | Phlpp                 | 0.42±0.18  |
| PHD finger protein 12                                                                                                           | Phf12                 | 1.16±0.19  |
| PHD finger protein 13 (predicted)                                                                                               | Phf13_predicted       | 0.51±0.18  |
| PHD finger protein 14                                                                                                           | Phf14                 | 0.53±0.32  |
| PHD finger protein 17 (predicted)                                                                                               | Phf17_predicted       | 5.61±0.31  |
| PHD finger protein 2 (predicted)                                                                                                | Phf2_predicted        | 1.28±0.09  |
| PHD finger protein 20-like 1                                                                                                    | Phf20l1               | 3.08±0.14  |
| PHD finger protein 3 (predicted)                                                                                                | Phf3_predicted        | 1.5±0.27   |
| PHD finger protein 5A                                                                                                           | Phf5a                 | 2.92±0.63  |
| PHD finger protein 7                                                                                                            | Phf7                  | 0.21±0.15  |
| phenazine biosynthesis-like protein domain containing                                                                           | Pbld                  | 9.05±1.5   |
| phenylalanine-tRNA synthetase 2 (mitochondrial)                                                                                 | Fars2                 | 0.94±0.26  |
| Phenylalanine-tRNA synthetase-like, alpha subunit                                                                               | Farsla                | 0.43±0.08  |
| phenylalanyl-tRNA synthetase, beta subunit                                                                                      | Farsb                 | 1.91±0.28  |

|                                                                                    |                      |            |
|------------------------------------------------------------------------------------|----------------------|------------|
| phenylalkylamine Ca2+ antagonist (emopamil) binding protein                        | Ebp                  | 3.05±0.27  |
| phosducin-like                                                                     | Pdcl                 | 1.68±0.01  |
| phosducin-like 3                                                                   | Pdcl3                | 0.99±0.76  |
| phosphatase and tensin homolog                                                     | Pten                 | 1.31±0.08  |
| phosphatase, orphan 2                                                              | Phospho2             | 1.75±0.56  |
| phosphate cytidyltransferase 1, choline, alpha isoform                             | Pcyt1a               | 0.91±0.35  |
| phosphate cytidyltransferase 2, ethanolamine                                       | Pcyt2                | 5.61±1.35  |
| phosphatidic acid phosphatase 2a                                                   | Ppap2a               | 9.45±1.49  |
| phosphatidic acid phosphatase type 2 domain containing 1B                          | Ppapdc1b             | 1.87±0.09  |
| phosphatidic acid phosphatase type 2 domain containing 2                           | Ppapdc2              | 1.62±0.54  |
| phosphatidic acid phosphatase type 2 domain containing 3                           | Ppapdc3              | 0.9±0.28   |
| phosphatidic acid phosphatase type 2B                                              | Ppap2b               | 6.32±3.54  |
| phosphatidic acid phosphatase type 2c                                              | Ppap2c               | 8.35±1.36  |
| phosphatidylcholine transfer protein                                               | Pctp                 | 1.16±0.33  |
| phosphatidylethanolamine binding protein 1                                         | Pebp1                | 42.03±4.82 |
| phosphatidylglycerophosphate synthase 1                                            | Pgs1                 | 1.09±0.29  |
| phosphatidylinositol (4,5) bisphosphate 5-phosphatase, A                           | Pib5pa               | 2.47±0.03  |
| phosphatidylinositol 3-kinase, regulatory subunit, polypeptide 3 (p55)             | Pik3r3               | 1.05±0.32  |
| phosphatidylinositol 3-kinase, C2 domain containing, alpha polypeptide (predicted) | Pik3c2a_predicted    | 1.97±0.12  |
| Phosphatidylinositol 3-kinase, catalytic, alpha polypeptide                        | Pik3ca               | 2.98±0.38  |
| phosphatidylinositol 3-kinase, catalytic, alpha polypeptide                        | LOC685590 /// Pik3ca | 0.32±0.01  |
| phosphatidylinositol 3-kinase, catalytic, beta polypeptide                         | Pik3cb               | 0.32±0.05  |
| phosphatidylinositol 3-kinase, regulatory subunit, polypeptide 1 (p85 alpha)       | Pik3r1               | 1.48±1.17  |
| phosphatidylinositol 3-kinase, regulatory subunit, polypeptide 2 (p85 beta)        | Pik3r2               | 0.73±0.32  |
| phosphatidylinositol 4-kinase type 2 alpha                                         | Pi4k2a               | 0.34±0.21  |
| phosphatidylinositol 4-kinase type 2 beta                                          | Pi4k2b               | 0.56±0.3   |
| phosphatidylinositol 4-kinase, catalytic, alpha                                    | Pi4ka                | 2.28±0.42  |
| phosphatidylinositol 4-kinase, catalytic, beta polypeptide                         | Pi4kb                | 2.99±0.56  |
| Phosphatidylinositol binding clathrin assembly protein                             | Picalm               | 5.62±2.34  |
| phosphatidylinositol glycan anchor biosynthesis, class C                           | Pigc                 | 2.36±0.59  |
| phosphatidylinositol glycan anchor biosynthesis, class H                           | Pigh                 | 0.64±0.26  |
| phosphatidylinositol glycan anchor biosynthesis, class L                           | Pigl                 | 1.27±0.49  |
| phosphatidylinositol glycan anchor biosynthesis, class M                           | Pigm                 | 0.26±0.12  |
| phosphatidylinositol glycan anchor biosynthesis, class O                           | Pigo                 | 1.14±0.28  |
| phosphatidylinositol glycan anchor biosynthesis, class P                           | Pi qp                | 16.84±0.93 |
| phosphatidylinositol glycan anchor biosynthesis, class Q                           | Piqq                 | 5.19±1.83  |
| phosphatidylinositol glycan anchor biosynthesis, class S                           | Pigs                 | 1.71±0.06  |
| phosphatidylinositol glycan anchor biosynthesis, class T                           | Pigt                 | 4.45±1.4   |
| phosphatidylinositol glycan anchor biosynthesis, class V                           | Pigv                 | 0.36±0.13  |
| phosphatidylinositol glycan anchor biosynthesis, class X                           | Pigx                 | 3.87±0.3   |
| phosphatidylinositol glycan anchor biosynthesis, class Y                           | Pigy                 | 8.85±1.51  |
| phosphatidylinositol glycan, class K /// ubiquitin specific peptidase 33           | Pigk /// Usp33       | 3.13±0.16  |
| phosphatidylinositol transfer protein, alpha                                       | Pitpna               | 2.98±0.46  |
| phosphatidylinositol transfer protein, beta                                        | Pitpnb               | 3.6±0.87   |
| phosphatidylinositol transfer protein, membrane-associated 1                       | Pitpnm1              | 2.04±0.27  |
| phosphatidylinositol transfer protein, membrane-associated 2 (predicted)           | Pitpnm2_predicted    | 1.24±0.24  |
| phosphatidylinositol-4-phosphate 5-kinase, type 1, alpha (predicted)               | Pip5k1a_predicted    | 0.98±0.44  |
| phosphatidylinositol-4-phosphate 5-kinase, type I, gamma                           | Pip5k1c              | 2.28±0.18  |
| phosphatidylinositol-5-phosphate 4-kinase, type II, gamma                          | Pip4k2c              | 3.29±0.66  |
| phosphatidylserine decarboxylase                                                   | Pisd                 | 1.22±0.21  |
| phosphatidylserine synthase 1                                                      | Ptdss1               | 2.88±0.2   |
| phosphatidylserine synthase 2 (predicted)                                          | Ptdss2_predicted     | 2.03±0.31  |
| phosphodiesterase 1A, calmodulin-dependent                                         | Pde1a                | 2.77±0.95  |
| phosphodiesterase 1C                                                               | Pde1c                | 0.6±0.03   |
| Phosphodiesterase 4A, cAMP specific                                                | Pde4a                | 1.87±0.16  |
| phosphodiesterase 4D interacting protein (myomegalin)                              | Pde4dip              | 0.23±0.04  |
| phosphodiesterase 6D, cGMP-specific, rod, delta (predicted)                        | Pde6d_predicted      | 2.49±0.61  |
| phosphodiesterase 7A                                                               | Pde7a                | 0.33±0.05  |
| Phosphodiesterase 8A                                                               | Pde8a                | 1.62±0.42  |
| phosphoenolpyruvate carboxykinase 2 (mitochondrial) (predicted)                    | Pck2_predicted       | 2.12±0.12  |
| phosphofructokinase, liver, B-type                                                 | Pfkl                 | 1.71±0.27  |
| phosphofructokinase, muscle                                                        | Pfkm                 | 6.58±1.08  |
| phosphofructokinase, platelet                                                      | Pfkp                 | 16.82±4.4  |
| phosphofurin acidic cluster sorting protein 1                                      | Pacs1                | 1.32±0.64  |
| phosphoglucosyltransferase 1                                                       | Pgm1                 | 2.38±0.27  |
| phosphoglucosyltransferase 2                                                       | Pgm2                 | 1.34±0.95  |
| phosphoglucosyltransferase 3 (predicted)                                           | Pgm3_predicted       | 0.37±0.1   |
| phosphoglycerate dehydrogenase like 1                                              | Phgdh1               | 2.13±0.37  |
| phosphoglycerate kinase 1                                                          | Pgk1                 | 35.5±1.58  |
| phosphoglycerate mutase 1                                                          | Pgam1                | 24.71±5.11 |
| phosphoglycerate mutase family member 5                                            | Pgam5                | 1.82±0.54  |
| phosphohistidine phosphatase 1 (predicted)                                         | Phpt1_predicted      | 6.98±0.34  |
| Phosphoinositide-3-kinase adaptor protein 1 (predicted)                            | Pik3ap1_predicted    | 0.53±0.15  |
| phosphoinositide-3-kinase interacting protein 1                                    | Pik3ip1              | 0.73±0.35  |
| phosphoinositide-3-kinase, class 3                                                 | Pik3c3               | 1.18±0.24  |
| phosphoinositide-3-kinase, regulatory subunit 4, p150 (predicted)                  | Pik3r4_predicted     | 1.48±0.39  |
| phospholipase A2, activating protein                                               | Plaa                 | 1.63±0.34  |
| phospholipase A2, group IVA (cytosolic, calcium-dependent)                         | Pla2g4a              | 0.29±0.44  |
| phospholipase A2, group VI                                                         | Pla2g6               | 0.51±0.12  |
| phospholipase A2, group XIIA (predicted)                                           | Pla2g12a_predicted   | 2.71±0.5   |
| phospholipase C, beta 1                                                            | Plcb1                | 1.74±0.09  |
| phospholipase C, delta 1                                                           | Plcd1                | 0.26±0.21  |
| phospholipase C, epsilon 1                                                         | Plce1                | 1.14±0.14  |
| phospholipase C, eta 1                                                             | Plch1                | 0.33±0.41  |
| phospholipase C, gamma 1                                                           | Plcg1                | 1.63±1.02  |
| phospholipase D family, member 3                                                   | Pld3                 | 0.55±0.08  |
| phospholipase D1                                                                   | Pld1                 | 0.36±0.22  |

|                                                                                                      |                   |             |
|------------------------------------------------------------------------------------------------------|-------------------|-------------|
| phospholipid scramblase 1                                                                            | Plscr1            | 2.05±0.41   |
| phospholipid scramblase 2                                                                            | Plscr2            | 0.91±0.36   |
| phospholipid scramblase 3                                                                            | Plscr3            | 0.37±0.15   |
| phospholysine phosphohistidine inorganic pyrophosphate phosphatase                                   | Lhpp              | 0.57±0.12   |
| phosphomannomutase 1                                                                                 | Pmm1              | 4.92±0.3    |
| phosphomannomutase 2 (predicted)                                                                     | Pmm2_predicted    | 3.09±0.69   |
| phosphomevalonate kinase                                                                             | Pmvk              | 1.94±0.15   |
| phosphopantothenoylcysteine decarboxylase (predicted)                                                | Ppcdc_predicted   | 0.41±0.07   |
| phosphopantothenoylcysteine synthetase                                                               | Ppcs              | 1±0.28      |
| phosphoribosyl pyrophosphate amidotransferase                                                        | Ppat              | 3.25±0.18   |
| phosphoribosyl pyrophosphate synthetase 1                                                            | Prps1             | 4.14±1.13   |
| phosphoribosyl pyrophosphate synthetase 2                                                            | Prps2             | 9.5±4.23    |
| phosphoribosyl pyrophosphate synthetase-associated protein 1                                         | Prpsap1           | 3.45±0      |
| phosphoribosyl pyrophosphate synthetase-associated protein 2                                         | Prpsap2           | 0.96±0.59   |
| phosphoribosylaminoimidazole carboxylase, phosphoribosylaminoimidazole succinocarboxamide synthetase | Paics             | 14.72±1.31  |
| phosphoribosylformylglycinamide synthase (FGAR amidotransferase) (predicted)                         | Pfas_predicted    | 2.29±0.5    |
| phosphoribosylglycinamide formyltransferase                                                          | Gart              | 1.5±0.29    |
| Phosphorylase kinase alpha 1                                                                         | Phka1             | 0.85±0.17   |
| phosphorylase kinase, gamma 2 (testis)                                                               | Phkq2             | 3.17±0.43   |
| phosphoserine aminotransferase 1                                                                     | Psat1             | 0.43±0.76   |
| Phytanoyl-CoA hydroxylase                                                                            | Phyh              | 38.34±12.08 |
| Phytn_dehydro and Pyr_redox domain containing protein RGD1303232                                     | RGD1303232        | 10.79±0.23  |
| phytoceramidase, alkaline                                                                            | Phca              | 1.8±0.08    |
| PIH1 domain containing 1                                                                             | Pih1d1            | 0.78±0.09   |
| PIN2-interacting protein 1                                                                           | Pinx1             | 0.29±0.22   |
| pinin                                                                                                | Pnn               | 2.17±0.33   |
| pitrilysin metalloproteinase 1 (predicted)                                                           | Pitrm1_predicted  | 3.16±0.53   |
| pituitary tumor-transforming 1                                                                       | Pttg1             | 0.91±0.32   |
| pituitary tumor-transforming 1 interacting protein                                                   | Pttg1ip           | 8.11±3.29   |
| plakophilin 2                                                                                        | Pkp2              | 2.59±0.7    |
| plakophilin 3 (predicted)                                                                            | Pkp3_predicted    | 1.11±0.29   |
| plakophilin 4 (predicted)                                                                            | Pkp4_predicted    | 16.73±1.93  |
| plasma glutamate carboxypeptidase                                                                    | Pgcp              | 7.02±1.64   |
| plasminogen activator, urokinase                                                                     | Plau              | 46.6±7.64   |
| plastin 3 (T-isoform)                                                                                | Pls3              | 13.6±6.79   |
| platelet derived growth factor, alpha                                                                | Pdgfa             | 9.46±0.33   |
| platelet-activating factor acetylhydrolase, isoform 1b, alpha1 subunit                               | Pafah1b3          | 0.73±0.32   |
| platelet-activating factor acetylhydrolase, isoform 1b, alpha2 subunit                               | Pafah1b2          | 1.68±0.49   |
| platelet-activating factor acetylhydrolase, isoform 1b, alpha subunit 45kDa                          | Pafah1b1          | 2.13±0.11   |
| platelet-derived growth factor, C polypeptide                                                        | Pdgfc             | 1.68±0.01   |
| pleckstrin and Sec7 domain containing 4                                                              | Psd4              | 0.27±0.11   |
| pleckstrin homology domain containing, family A (phosphoinositide binding specific) member 1         | Plekha1           | 2.34±0.2    |
| pleckstrin homology domain containing, family A (phosphoinositide binding specific) member 8         | Plekha8           | 0.62±0.09   |
| Pleckstrin homology domain containing, family A member 5                                             | Plekha5           | 1.38±0.12   |
| pleckstrin homology domain containing, family A member 6 (predicted)                                 | Plekha6_predicted | 5.34±0.75   |
| pleckstrin homology domain containing, family B (evectins) member 2 (predicted)                      | Plekhh2_predicted | 9.05±1.74   |
| pleckstrin homology domain containing, family C (with FERM domain) member 1                          | Plekhc1           | 6.35±1.65   |
| pleckstrin homology domain containing, family F (with FYVE domain) member 1                          | Plekfh1           | 1.72±0.32   |
| pleckstrin homology domain containing, family F (with FYVE domain) member 2 (predicted)              | Plekfh2_predicted | 0.44±0.72   |
| pleckstrin homology domain containing, family G (with RhoGef domain) member 3                        | Plekgh3           | 5.28±0.68   |
| pleckstrin homology domain containing, family H (with MyTH4 domain) member 1 (predicted)             | Plekhh1_predicted | 1.58±0.42   |
| pleckstrin homology domain containing, family H (with MyTH4 domain) member 3                         | Plekhh3           | 0.57±0.14   |
| pleckstrin homology domain containing, family J member 1                                             | Plekjh1           | 1.84±0.78   |
| pleckstrin homology domain containing, family M (with RUN domain) member 1                           | Plekhhm1          | 0.23±0.16   |
| pleckstrin homology domain-containing, family A (phosphoinositide binding specific) member 3         | Plekha3           | 3.03±0.52   |
| pleckstrin homology, Sec7 and coiled-coil domains 1                                                  | Pscd1             | 0.3±0.02    |
| pleckstrin homology, Sec7 and coiled-coil domains 2                                                  | Pscd2             | 1.65±0.24   |
| pleckstrin homology-like domain, family B, member 2                                                  | Phldb2            | 5.82±0.29   |
| plectin 1                                                                                            | Plec1             | 3.77±0.45   |
| pleiomorphic adenoma gene-like 1                                                                     | Plaql1            | 6.58±1.84   |
| pleiotropic regulator 1, PRL1 homolog (Arabidopsis)                                                  | Plrg1             | 2.82±0.53   |
| plexin A3                                                                                            | Plxna3            | 0.51±0.12   |
| plexin B1 (predicted)                                                                                | Plxnb1_predicted  | 3.23±0.27   |
| plexin B2                                                                                            | Plxnb2            | 5.8±2.05    |
| plexin domain containing 2 (predicted)                                                               | Plxdc2_predicted  | 2.61±0.01   |
| PMF32 protein                                                                                        | Pmf31             | 0.62±0.08   |
| pogo transposable element with KRAB domain (predicted)                                               | Pogk_predicted    | 0.77±0      |
| pogo transposable element with ZNF domain (predicted)                                                | Pogz_predicted    | 0.75±0.09   |
| poliovirus receptor-related 2                                                                        | Pvrl2             | 0.61±0.56   |
| Poliovirus receptor-related 3 (predicted)                                                            | Pvrl3_predicted   | 2.31±0.37   |
| polo-like kinase 4 (Drosophila) (predicted)                                                          | Plk4_predicted    | 0.22±0.07   |
| poly (A) polymerase alpha (predicted)                                                                | Papola_predicted  | 1.48±0.64   |
| poly (ADP-ribose) glycohydrolase                                                                     | Parg              | 1.48±0.02   |
| poly (ADP-ribose) polymerase family, member 1                                                        | Parp1             | 1.94±0.25   |
| poly (ADP-ribose) polymerase family, member 12 (predicted)                                           | Parp12_predicted  | 0.65±0.06   |
| poly (ADP-ribose) polymerase family, member 16                                                       | Parp16            | 0.63±0.01   |
| poly (ADP-ribose) polymerase family, member 2 (predicted)                                            | Parp2_predicted   | 0.84±0.12   |
| poly (ADP-ribose) polymerase family, member 6                                                        | Parp6             | 1.51±0.07   |
| poly (ADP-ribose) polymerase family, member 8                                                        | Parp8             | 0.3±0.13    |
| poly (ADP-ribose) polymerase family, member 9 (predicted)                                            | Parp9_predicted   | 1.02±0.02   |
| poly A binding protein, cytoplasmic 4                                                                | Pabpc4            | 9.48±0.55   |
| poly(A) binding protein, cytoplasmic 1                                                               | Pabpc1            | 16.38±3.06  |
| poly(A) polymerase gamma (predicted)                                                                 | Papolg_predicted  | 0.42±0.23   |
| poly(A)-specific ribonuclease (deadenylation nuclease)                                               | Parn              | 0.93±0.04   |
| poly(rC) binding protein 1                                                                           | Pcbp1             | 10.84±2.07  |
| poly(rC) binding protein 2                                                                           | Pcbp2             | 13.42±0.55  |
| poly(rC) binding protein 3                                                                           | Pcbp3             | 0.38±0.06   |



|                                                                                           |                          |            |
|-------------------------------------------------------------------------------------------|--------------------------|------------|
| poly(rC) binding protein 4 (predicted)                                                    | Pcbp4_predicted          | 0.67±0.24  |
| polyadenylate binding protein-interacting protein 1 (predicted)                           | Paip1_predicted          | 7.2±0.66   |
| polyadenylate-binding protein interacting protein 2                                       | Paip2                    | 14±1.4     |
| polyamine-modulated factor 1                                                              | Pmf1                     | 0.71±0.22  |
| polybromo 1                                                                               | Pbrm1                    | 0.55±0.18  |
| polycomb group ring finger 1                                                              | Pcgf1                    | 1.18±0.03  |
| polycomb group ring finger 2 (predicted)                                                  | Pcgf2_predicted          | 0.56±0.1   |
| polycomb group ring finger 3                                                              | Pcgf3                    | 0.34±0.02  |
| Polycomb group ring finger 4 (predicted)                                                  | Pcgf4_predicted          | 4.73±0.45  |
| polycomb group ring finger 5 /// similar to polycomb group ring finger 5                  | LOC687730 /// Pcgf5      | 2.6±0.49   |
| polycomb group ring finger 6                                                              | Pcgf6                    | 0.88±0.16  |
| polyglutamine binding protein 1                                                           | Pqbp1                    | 1.81±0.18  |
| polyhomeotic-like 1 (Drosophila) (predicted)                                              | Phc1_predicted           | 0.92±0.07  |
| polyhomeotic-like 2 (Drosophila)                                                          | Phc2                     | 2.6±0.23   |
| polymerase (DNA directed) sigma (predicted)                                               | Pols_predicted           | 1.22±0.06  |
| polymerase (DNA directed), alpha 2                                                        | Pola2                    | 1.09±0.07  |
| polymerase (DNA directed), beta                                                           | Polb                     | 1.46±0.09  |
| polymerase (DNA directed), delta 2, regulatory subunit                                    | Pold2                    | 1.2±0.21   |
| polymerase (DNA directed), epsilon 3 (p17 subunit)                                        | Pole3                    | 2.16±0.19  |
| polymerase (DNA directed), eta (RAD 30 related) (predicted)                               | Polh_predicted           | 0.2±0.02   |
| polymerase (DNA directed), gamma                                                          | Polg                     | 1.04±0.09  |
| polymerase (DNA directed), gamma 2, accessory subunit (predicted)                         | Polq2_predicted          | 1.61±0.01  |
| polymerase (DNA directed), lambda                                                         | Poll                     | 0.69±0.31  |
| polymerase (DNA directed), mu                                                             | Polm                     | 0.4±0.03   |
| polymerase (DNA-directed), delta 3, accessory subunit                                     | Pold3                    | 0.4±0.05   |
| polymerase (DNA-directed), delta 4                                                        | Pold4                    | 2.37±0.37  |
| polymerase (DNA-directed), delta interacting protein 2 (predicted)                        | Poldip2_predicted        | 8.21±1.15  |
| polymerase (DNA-directed), delta interacting protein 3 (predicted)                        | Poldip3_predicted        | 0.83±0.24  |
| polymerase (DNA-directed), epsilon 4 (p12 subunit) (predicted)                            | Pole4_predicted          | 14.77±0.56 |
| polymerase (RNA) I polypeptide E                                                          | Polr1e                   | 0.43±0.03  |
| polymerase (RNA) II (DNA directed) polypeptide A                                          | Polr2a                   | 1.59±0.66  |
| polymerase (RNA) II (DNA directed) polypeptide B (predicted)                              | Polr2b_predicted         | 2.87±1.07  |
| polymerase (RNA) II (DNA directed) polypeptide C                                          | Polr2c                   | 1.99±0.15  |
| polymerase (RNA) II (DNA directed) polypeptide C /// similar to RIKEN cDNA 2310005O14     | LOC498909 /// Polr2c     | 15.51±1.74 |
| polymerase (RNA) II (DNA directed) polypeptide D (predicted)                              | Polr2d_predicted         | 3.32±0.7   |
| polymerase (RNA) II (DNA directed) polypeptide E                                          | Polr2e                   | 8.39±1.2   |
| polymerase (RNA) II (DNA directed) polypeptide F                                          | Polr2f                   | 4.08±1.21  |
| polymerase (RNA) II (DNA directed) polypeptide G                                          | Polr2g                   | 4.37±0.26  |
| polymerase (RNA) II (DNA directed) polypeptide H (predicted)                              | Polr2h /// Polr2h_predic | 1.26±0.29  |
| polymerase (RNA) II (DNA directed) polypeptide I (predicted)                              | Polr2i_predicted         | 2.81±0.21  |
| polymerase (RNA) II (DNA directed) polypeptide J (predicted)                              | Polr2j_predicted         | 6.23±0.54  |
| polymerase (RNA) III (DNA directed) polypeptide A                                         | Polr3a                   | 1.06±0.34  |
| polymerase (RNA) III (DNA directed) polypeptide C                                         | Polr3c                   | 1.15±0.28  |
| polymerase (RNA) III (DNA directed) polypeptide D                                         | Polr3d                   | 2.02±0.48  |
| polymerase (RNA) III (DNA directed) polypeptide E (predicted)                             | Polr3e_predicted         | 0.66±0.11  |
| polymerase (RNA) III (DNA directed) polypeptide F (predicted)                             | Polr3f_predicted         | 0.71±0.04  |
| polymerase (RNA) III (DNA directed) polypeptide G                                         | Polr3g                   | 0.75±0.07  |
| polymerase (RNA) III (DNA directed) polypeptide H (predicted)                             | Polr3h_predicted         | 0.51±0.1   |
| polymerase (RNA) III (DNA directed) polypeptide K                                         | Polr3k                   | 2.86±0.54  |
| polymerase (RNA) mitochondrial (DNA directed) (predicted)                                 | Polrmt_predicted         | 1.09±0.24  |
| polynucleotide kinase 3'-phosphatase                                                      | Pnkp                     | 1.19±0.32  |
| polypyrimidine tract binding protein 1                                                    | Ptbp1                    | 7.08±0.54  |
| polyribonucleotide nucleotidyltransferase 1                                               | Pnpt1                    | 2.61±0.27  |
| popeye domain containing 2                                                                | Popdc2                   | 0.34±0.01  |
| postmeiotic segregation increased 1 (S. cerevisiae)                                       | Pms1                     | 1.37±0.54  |
| postmeiotic segregation increased 2 (S. cerevisiae) (predicted)                           | Pms2_predicted           | 0.74±0.04  |
| potassium channel tetramerisation domain containing 1                                     | Kctd1                    | 3.27±0.01  |
| potassium channel tetramerisation domain containing 13                                    | Kctd13                   | 0.38±0.13  |
| potassium channel tetramerisation domain containing 14 (predicted)                        | Kctd14_predicted         | 1.37±0.36  |
| potassium channel tetramerisation domain containing 15                                    | Kctd15                   | 5.15±0.37  |
| potassium channel tetramerisation domain containing 2                                     | Kctd2                    | 2.22±0.22  |
| potassium channel tetramerisation domain containing 3                                     | Kctd3                    | 1.11±0.02  |
| potassium channel tetramerisation domain containing 5 (predicted)                         | Kctd5_predicted          | 0.55±0.03  |
| potassium channel tetramerisation domain containing 6 (predicted)                         | Kctd6_predicted          | 1.61±0.52  |
| potassium channel tetramerisation domain containing 9 (predicted)                         | Kctd9_predicted          | 0.72±0.13  |
| potassium channel tetramerization domain containing 10                                    | Kctd10                   | 1.01±0.22  |
| potassium channel, subfamily K, member 1                                                  | Kcnk1                    | 1.44±0.51  |
| potassium channel, subfamily T, member 1                                                  | Kcnt1                    | 4.84±0.16  |
| potassium intermediate/small conductance calcium-activated channel, subfamily N, member 1 | Kcnn1                    | 0.88±0.07  |
| potassium intermediate/small conductance calcium-activated channel, subfamily N, member 2 | Kcnn2                    | 0.41±0.14  |
| potassium inwardly-rectifying channel, subfamily J, member 1                              | Kcnj1                    | 26.6±9.62  |
| potassium inwardly-rectifying channel, subfamily J, member 16                             | Kcnj16                   | 10.37±0.24 |
| potassium inwardly-rectifying channel, subfamily J, member 4                              | Kcnj4                    | 0.4±0.07   |
| potassium inwardly-rectifying channel, subfamily J, member 5                              | Kcnj5                    | 1.14±0.43  |
| potassium voltage-gated channel, subfamily Q, member 1                                    | Kcnq1                    | 1.79±0.05  |
| POU domain, class 2, transcription factor 1                                               | Pou2f1                   | 0.47±0.31  |
| POU domain, class 3, transcription factor 3                                               | Pou3f3                   | 8.96±4.3   |
| POU domain, class 6, transcription factor 1                                               | Pou6f1                   | 0.3±0.15   |
| PP3111 protein                                                                            | Pp3111                   | 1.87±0.37  |
| PQ loop repeat containing 1                                                               | Pqlc1                    | 0.78±1.26  |
| PR domain containing 15 (predicted)                                                       | Prdm15_predicted         | 0.75±0.2   |
| PR domain containing 2, with ZNF domain                                                   | Prdm2                    | 0.52±0.24  |
| PR domain containing 4                                                                    | Prdm4                    | 0.43±0.11  |
| PRA1 domain family 2 (predicted)                                                          | Praf2_predicted          | 2.69±0.63  |
| praja 2, RING-H2 motif containing                                                         | Pja2                     | 4.04±0.83  |
| pre B-cell leukemia transcription factor 3 (predicted)                                    | Pbx3_predicted           | 1.27±0.65  |
| pre-B-cell colony enhancing factor 1                                                      | Pbef1                    | 3.67±0.91  |

|                                                                                                |                      |            |
|------------------------------------------------------------------------------------------------|----------------------|------------|
| pre-B-cell leukemia transcription factor 2                                                     | Pbx2                 | 1.88±0.06  |
| pre-B-cell leukemia transcription factor interacting protein 1                                 | Pbxip1               | 3.71±0.1   |
| prefoldin 1 (predicted)                                                                        | Pfdn1_predicted      | 4.14±1.13  |
| prefoldin 2                                                                                    | Pfdn2                | 2.92±0.01  |
| prefoldin 5 (predicted)                                                                        | Pfdn5_predicted      | 6.14±0.5   |
| pregnancy specific beta-1-glycoprotein 4                                                       | Psg4                 | 0.38±0.05  |
| PRELI domain containing 1                                                                      | Preli1               | 4.55±0.75  |
| PRELI domain containing 2 /// hypothetical protein LOC683855                                   | LOC683855 /// Preli2 | 0.98±0.16  |
| pre-mRNA processing factor 8                                                                   | Prpf8                | 5.36±0.21  |
| prenyl (solaneyl) diphosphate synthase, subunit 2                                              | Pdss2                | 1.3±0.16   |
| Prenylated SNARE protein                                                                       | Ykt6                 | 1.79±0.28  |
| preylcysteine oxidase 1                                                                        | Pcyox1               | 1.78±0.74  |
| presenilin 1                                                                                   | Psen1                | 3.23±0.8   |
| presenilin 2                                                                                   | Psen2                | 0.45±0.09  |
| presenilin 2 /// chaperone, ABC1 activity of bc1 complex like (S. pombe)                       | Cabc1 /// Psen2      | 4.21±0.96  |
| presenilin associated, rhomboid-like                                                           | Par1                 | 3.06±0.92  |
| presenilin enhancer 2 homolog (C. elegans)                                                     | Psenen               | 9.01±1.22  |
| prickle homolog 3 (Drosophila)                                                                 | Prickle3             | 1.54±0.27  |
| prickle homolog 4 (Drosophila)                                                                 | Prickle4             | 7.02±0.63  |
| prickle-like 1 (Drosophila)                                                                    | Prickle1             | 0.63±0.14  |
| prion protein                                                                                  | Prnp                 | 3.48±0.01  |
| prion protein interacting protein 1                                                            | Prnpip1              | 1.11±0.46  |
| PRKC, apoptosis, WT1, regulator                                                                | Pawr                 | 2.64±0.37  |
| Prkr interacting protein 1 (IL11 inducible)                                                    | Prkrip1              | 0.48±0.25  |
| processing of precursor 1, ribonuclease P/MRP family, (S. cerevisiae) (predicted)              | Pop1_predicted       | 0.38±0.12  |
| processing of precursor 4, ribonuclease P/MRP family, (S. cerevisiae)                          | Pop4                 | 1.47±0.15  |
| processing of precursor 5, ribonuclease P/MRP family (S. cerevisiae) (predicted)               | Pop5_predicted       | 1.48±0.12  |
| processing of precursor 7, ribonuclease P family, (S. cerevisiae) (predicted)                  | Pop7_predicted       | 1.66±0.85  |
| procollagen C-endopeptidase enhancer protein                                                   | Pcolce               | 1.87±0.13  |
| procollagen lysine, 2-oxoglutarate 5-dioxygenase 2                                             | Plod2                | 10.6±2.32  |
| procollagen, type IV, alpha 3 (Goodpasture antigen) binding protein (predicted)                | Col4a3bp_predicted   | 3.46±0.34  |
| procollagen, type IV, alpha 4                                                                  | Col4a4               | 1.02±0.36  |
| procollagen, type XVI, alpha 1                                                                 | Col16a1              | 0.27±0.06  |
| procollagen-lysine, 2-oxoglutarate 5-dioxygenase 1                                             | Plod1                | 0.24±0.06  |
| procollagen-lysine, 2-oxoglutarate 5-dioxygenase 3                                             | Plod3                | 1.63±0.31  |
| procollagen-proline, 2-oxoglutarate 4-dioxygenase (proline 4-hydroxylase), alpha 1 polypeptide | P4ha1                | 0.39±0.54  |
| profilin 1                                                                                     | Pfn1                 | 6.86±1.53  |
| profilin 2                                                                                     | Pfn2                 | 6.03±1.55  |
| progesterone receptor membrane component 1                                                     | Pgrmc1               | 5.18±3.45  |
| progesterone receptor membrane component 2                                                     | Pgrmc2               | 4.01±0.26  |
| progesterone and adipoQ receptor family member V                                               | Paqr5                | 17.49±3.38 |
| progesterone induced protein                                                                   | Dd5                  | 5.44±0.14  |
| programmed cell death 10                                                                       | Pdcd10               | 5.34±0.9   |
| programmed cell death 2                                                                        | Pdcd2                | 0.81±0.09  |
| programmed cell death 4                                                                        | Pdcd4                | 1.52±3.14  |
| programmed cell death 5 (predicted)                                                            | Pdcd5_predicted      | 7.89±2.42  |
| programmed cell death 6 (predicted)                                                            | Pdcd6_predicted      | 8.93±0.69  |
| programmed cell death 6 interacting protein                                                    | Pdcd6ip              | 2.73±0.32  |
| programmed cell death protein 11 (predicted)                                                   | Pdcd11_predicted     | 1.13±0.24  |
| programmed cell death protein 7 (predicted)                                                    | Pdcd7_predicted      | 1.03±0.1   |
| progressive external ophthalmoplegia 1 (human)                                                 | Peo1                 | 0.9±0.23   |
| prohibitin                                                                                     | Phb                  | 12.9±1.44  |
| prohibitin 2                                                                                   | Phb2                 | 14.21±2.72 |
| prolactin regulatory element binding                                                           | Preb                 | 1.04±0.31  |
| proliferating cell nuclear antigen                                                             | Pcna                 | 8.52±0.49  |
| proliferation-associated 2G4                                                                   | Pa2g4                | 2.14±0.24  |
| proline rich 12                                                                                | Prr12                | 0.84±0.16  |
| proline rich 13                                                                                | Prr13                | 3.43±0.44  |
| proline rich 14                                                                                | Prr14                | 1.8±0.03   |
| proline synthetase co-transcribed (predicted)                                                  | Prosc_predicted      | 3.01±0.75  |
| proline, glutamic acid and leucine rich protein 1                                              | Pelp1                | 0.61±0.11  |
| proline/serine-rich coiled-coil 1                                                              | Psrc1                | 0.27±0.1   |
| proline/serine-rich coiled-coil 2                                                              | Psrc2                | 1.58±0.16  |
| proline-rich nuclear receptor coactivator 1                                                    | Pnrc1                | 4.07±3.31  |
| proline-rich nuclear receptor coactivator 2                                                    | Pnrc2                | 6.46±1.45  |
| proline-rich polypeptide 3                                                                     | Prr3                 | 0.77±0.23  |
| proline-rich polypeptide 6                                                                     | Prr6                 | 0.8±0.04   |
| proline-serine-threonine phosphatase-interacting protein 1 (predicted)                         | Pstpip1_predicted    | 0.2±0.16   |
| prolyl 4-hydroxylase, beta polypeptide                                                         | P4hb                 | 29.6±4.73  |
| prolyl endopeptidase                                                                           | Prep                 | 1.53±0.12  |
| prolyl endopeptidase-like                                                                      | Prepl                | 0.61±0.38  |
| promethin                                                                                      | LOC378467            | 0.79±0.23  |
| prominin 1                                                                                     | Prom1                | 5.78±0.26  |
| prominin 2                                                                                     | Prom2                | 8.4±1.34   |
| propionyl coenzyme A carboxylase, beta polypeptide                                             | Pccb                 | 22.17±0.99 |
| propionyl-coenzyme A carboxylase, alpha polypeptide                                            | Pcca                 | 8.84±1.32  |
| proprotein convertase subtilisin/kexin type 6                                                  | Pcsk6                | 14.4±2.6   |
| proprotein convertase subtilisin/kexin type 7                                                  | Pcsk7                | 1.51±0.11  |
| prosaposin                                                                                     | Psap                 | 10.08±1.32 |
| prostaglandin D2 synthase (brain)                                                              | Ptgds                | 4.45±1.28  |
| Prostaglandin E receptor 3 (subtype EP3)                                                       | Ptger3               | 20.54±3.55 |
| prostaglandin E synthase 2 (predicted)                                                         | Ptges2_predicted     | 6.03±1.24  |
| prostaglandin E synthase 3 (cytosolic) (predicted)                                             | Ptges3_predicted     | 13.85±0.44 |
| prostaglandin F2 receptor negative regulator                                                   | Ptgrn                | 1.44±0.14  |
| prostate tumor over expressed gene 1                                                           | Ptov1                | 3.67±0.34  |
| protease (prosome, macropain) 26S subunit, ATPase 1                                            | Psmc1                | 4.75±0.85  |
| protease (prosome, macropain) 26S subunit, ATPase 5                                            | Psmc5                | 4.01±1.23  |

|                                                                                                 |                      |            |
|-------------------------------------------------------------------------------------------------|----------------------|------------|
| protease, serine, 23                                                                            | Prss23               | 18.62±0.21 |
| protease, serine, 36                                                                            | Prss36               | 0.26±0.07  |
| protease, serine, 8 (prostatic)                                                                 | Prss8                | 4.2±0.09   |
| proteasome (prosome, macropain) 28 subunit, 3                                                   | Psmc3                | 4.19±1.19  |
| proteasome (prosome, macropain) 26S subunit, ATPase 2                                           | Psmc2                | 12.05±2.19 |
| proteasome (prosome, macropain) 26S subunit, ATPase 3                                           | Psmc3                | 8.57±1.79  |
| proteasome (prosome, macropain) 26S subunit, ATPase 3, interacting protein                      | Psmc3ip              | 1.04±0.66  |
| proteasome (prosome, macropain) 26S subunit, ATPase, 4                                          | Psmc4                | 3.69±0.88  |
| proteasome (prosome, macropain) 26S subunit, ATPase, 6                                          | Psmc6                | 1.88±1.31  |
| proteasome (prosome, macropain) 26S subunit, ATPase, 6 /// similar to Psmc6 protein (predicted) | Psmc6 /// RGD1559647 | 1.21±0.23  |
| proteasome (prosome, macropain) 26S subunit, non-ATPase, 1                                      | Psm1                 | 1.94±0.29  |
| proteasome (prosome, macropain) 26S subunit, non-ATPase, 11 (predicted)                         | Psm11_predicted      | 4.19±0.41  |
| proteasome (prosome, macropain) 26S subunit, non-ATPase, 12                                     | Psm12                | 4.43±1.76  |
| proteasome (prosome, macropain) 26S subunit, non-ATPase, 13 (predicted)                         | Psm13_predicted      | 1.43±0.5   |
| proteasome (prosome, macropain) 26S subunit, non-ATPase, 14                                     | Psm14                | 3.12±1.31  |
| proteasome (prosome, macropain) 26S subunit, non-ATPase, 2                                      | Psm2                 | 6.83±0.89  |
| proteasome (prosome, macropain) 26S subunit, non-ATPase, 3                                      | Psm3                 | 1.35±0.18  |
| proteasome (prosome, macropain) 26S subunit, non-ATPase, 4                                      | Psm4                 | 3.59±0.44  |
| proteasome (prosome, macropain) 26S subunit, non-ATPase, 5 (predicted)                          | Psm5_predicted       | 3.41±1.11  |
| proteasome (prosome, macropain) 26S subunit, non-ATPase, 6                                      | Psm6                 | 7.68±0.4   |
| proteasome (prosome, macropain) 26S subunit, non-ATPase, 7 (predicted)                          | Psm7_predicted       | 4.76±0.59  |
| proteasome (prosome, macropain) 26S subunit, non-ATPase, 8                                      | Psm8                 | 5.16±0.43  |
| proteasome (prosome, macropain) 26S subunit, non-ATPase, 9                                      | Psm9                 | 1.01±0.3   |
| proteasome (prosome, macropain) 28 subunit, alpha                                               | Psm1                 | 20.02±4.21 |
| proteasome (prosome, macropain) 28 subunit, beta                                                | Psm2                 | 5.61±0.6   |
| proteasome (prosome, macropain) activator subunit 4                                             | Psm4                 | 4.16±0.01  |
| proteasome (prosome, macropain) subunit, alpha type 1                                           | Psm1                 | 6.15±1.44  |
| proteasome (prosome, macropain) subunit, alpha type 2                                           | Psm2                 | 11.85±1.04 |
| proteasome (prosome, macropain) subunit, alpha type 3 /// proteasome subunit alpha type 3-like  | Psm3 /// Psm3l       | 9.51±0.61  |
| proteasome (prosome, macropain) subunit, alpha type 4                                           | Psm4                 | 5.65±1.29  |
| proteasome (prosome, macropain) subunit, alpha type 5                                           | Psm5                 | 6.81±1.07  |
| proteasome (prosome, macropain) subunit, alpha type 6                                           | Psm6                 | 17.8±0.63  |
| proteasome (prosome, macropain) subunit, alpha type 7                                           | Psm7                 | 17.07±3.75 |
| proteasome (prosome, macropain) subunit, beta type 1                                            | Psm1                 | 14.66±2.5  |
| proteasome (prosome, macropain) subunit, beta type 10                                           | Psm10                | 0.35±0.29  |
| proteasome (prosome, macropain) subunit, beta type 2                                            | Psm2                 | 7.74±1.31  |
| proteasome (prosome, macropain) subunit, beta type 3                                            | Psm3                 | 7.39±1.18  |
| proteasome (prosome, macropain) subunit, beta type 4                                            | Psm4                 | 16.4±0.62  |
| proteasome (prosome, macropain) subunit, beta type 5                                            | Psm5                 | 15.12±1.52 |
| proteasome (prosome, macropain) subunit, beta type 6                                            | Psm6                 | 4.93±0.77  |
| proteasome (prosome, macropain) subunit, beta type 7                                            | Psm7                 | 8.7±1.48   |
| proteasome maturation protein                                                                   | Pmp                  | 18.88±2.85 |
| protective protein for beta-galactosidase                                                       | Ppgb                 | 13.2±0.51  |
| protein (peptidyl-prolyl) cis/trans isomerase) NIMA-interacting 1 (predicted)                   | Pin1_predicted       | 3.71±0.24  |
| protein arginine N-methyltransferase 1                                                          | Prmt1                | 2.67±0.96  |
| protein arginine N-methyltransferase 2                                                          | Prmt2                | 2.05±0.27  |
| protein arginine N-methyltransferase 3                                                          | Prmt3                | 0.27±0.16  |
| protein arginine N-methyltransferase 4                                                          | Prmt4                | 1.17±0.14  |
| protein arginine N-methyltransferase 5 (predicted)                                              | Prmt5_predicted      | 1.7±0.02   |
| protein arginine N-methyltransferase 6 (predicted)                                              | Prmt6_predicted      | 0.38±0.01  |
| protein associated with topoisomerase II homolog 1 (yeast)                                      | Patl1                | 1.01±0.11  |
| protein disulfide isomerase associated 3                                                        | Pdia3                | 11.37±2.51 |
| protein disulfide isomerase associated 4                                                        | Pdia4                | 1.29±0.25  |
| protein disulfide isomerase associated 6                                                        | Pdia6                | 8.19±0.97  |
| protein inhibitor of activated STAT 1 (predicted)                                               | Pias1_predicted      | 1.22±0.05  |
| protein inhibitor of activated STAT 2                                                           | Pias2                | 2.01±0.26  |
| protein inhibitor of activated STAT 3                                                           | Pias3                | 1.37±0.23  |
| protein inhibitor of activated STAT, 4                                                          | Pias4                | 0.68±0.02  |
| protein interacting with C kinase 1                                                             | Pick1                | 1.48±0.41  |
| protein kinase C and casein kinase substrate in neurons 2                                       | Pacsin2              | 6.34±1.12  |
| protein kinase C and casein kinase substrate in neurons 3                                       | Pacsin3              | 1.04±0.25  |
| protein kinase C binding protein 1                                                              | Prkcbp1              | 2.64±0     |
| protein kinase C substrate 80K-H (predicted)                                                    | Prkcs_predicted      | 4.66±1.08  |
| protein kinase C, delta                                                                         | Prkcd                | 4.09±0.16  |
| protein kinase C, epsilon                                                                       | Prkce                | 0.53±0.09  |
| protein kinase C, iota                                                                          | Prkci                | 2.17±1.58  |
| protein kinase C, theta                                                                         | Prkcq                | 5.44±0.59  |
| protein kinase C, zeta                                                                          | Prkcz                | 2.85±0.29  |
| protein kinase D2                                                                               | Prkd2                | 0.45±0.24  |
| protein kinase D3                                                                               | Prkd3                | 1.35±0.15  |
| protein kinase inhibitor, gamma                                                                 | Pkig                 | 5.62±0.22  |
| protein kinase LYK5                                                                             | Lyk5                 | 1.3±0.17   |
| protein kinase N1                                                                               | Pkn1                 | 1.18±0.32  |
| protein kinase N2                                                                               | Pkn2                 | 3.4±0.31   |
| protein kinase, AMP-activated, alpha 2 catalytic subunit                                        | Prkaa2               | 2.31±0.34  |
| protein kinase, AMP-activated, beta 1 non-catalytic subunit                                     | Prkab1               | 6.35±0.48  |
| protein kinase, AMP-activated, gamma 1 non-catalytic subunit                                    | Prkag1               | 3.16±0.15  |
| protein kinase, AMP-activated, gamma 2 non-catalytic subunit                                    | Prkag2               | 0.54±0.27  |
| Protein kinase, cAMP dependent regulatory, type I, alpha                                        | Prkar1a              | 11.08±1.25 |
| protein kinase, cAMP dependent regulatory, type I, beta                                         | Prkar1b              | 5.03±0.03  |
| protein kinase, cAMP dependent regulatory, type II beta                                         | Prkar2b              | 0.58±0.48  |
| protein kinase, cAMP dependent, catalytic, beta                                                 | Prkacb               | 5.38±0.43  |
| protein kinase, cAMP-dependent, catalytic, alpha                                                | Prkaca               | 2.59±0.16  |
| protein kinase, cAMP-dependent, catalytic, alpha /// similar to CG2662-PA (predicted)           | Prkaca /// RGD130509 | 1.55±0.12  |
| protein kinase, cAMP-dependent, regulatory, type 2, alpha                                       | Prkar2a              | 0.3±0.03   |
| protein kinase, DNA activated, catalytic polypeptide (predicted)                                | Prkdc_predicted      | 0.88±0.5   |
| protein kinase, interferon inducible double stranded RNA dependent activator                    | Prkra                | 5.88±0.71  |

|                                                                                                                        |                       |            |
|------------------------------------------------------------------------------------------------------------------------|-----------------------|------------|
| Protein kinase, lysine deficient 1                                                                                     | Prkwnk1               | 5.33±0.8   |
| protein kinase, X-linked                                                                                               | Prkx                  | 2.78±0.17  |
| protein O-fucosyltransferase 2 (predicted)                                                                             | Pofut2_predicted      | 1.35±0.12  |
| protein O-linked mannose beta1,2-N-acetylglucosaminyltransferase                                                       | Pomgnt1               | 2.02±0.22  |
| protein phosphatase 1 (formerly 2C)-like (predicted)                                                                   | Ppm1L_predicted       | 1.43±0.36  |
| protein phosphatase 1, catalytic subunit, alpha isoform                                                                | Ppp1ca                | 16.25±1.35 |
| protein phosphatase 1, catalytic subunit, beta isoform                                                                 | Ppp1cb                | 15.11±3.85 |
| protein phosphatase 1, catalytic subunit, gamma isoform                                                                | Ppp1cc                | 20.36±0.69 |
| protein phosphatase 1, regulatory (inhibitor) subunit 11                                                               | Ppp1r11               | 4.15±0.11  |
| protein phosphatase 1, regulatory (inhibitor) subunit 12A                                                              | Ppp1r12a              | 1.1±0.86   |
| Protein phosphatase 1, regulatory (inhibitor) subunit 12B (predicted)                                                  | Ppp1r12b_predicted    | 0.98±0.2   |
| protein phosphatase 1, regulatory (inhibitor) subunit 12C                                                              | Ppp1r12c              | 0.49±0.19  |
| protein phosphatase 1, regulatory (inhibitor) subunit 13B (predicted)                                                  | Ppp1r13b_predicted    | 1.03±0.36  |
| protein phosphatase 1, regulatory (inhibitor) subunit 14B                                                              | Ppp1r14b              | 8.26±1.11  |
| protein phosphatase 1, regulatory (inhibitor) subunit 15b (predicted)                                                  | Ppp1r15b_predicted    | 2.18±0.21  |
| protein phosphatase 1, regulatory (inhibitor) subunit 16A (predicted)                                                  | Ppp1r16a_predicted    | 0.31±0.14  |
| protein phosphatase 1, regulatory (inhibitor) subunit 1A                                                               | Ppp1r1a               | 24.42±3.25 |
| protein phosphatase 1, regulatory (inhibitor) subunit 1B                                                               | Ppp1r1b               | 17.71±4.82 |
| protein phosphatase 1, regulatory (inhibitor) subunit 2                                                                | Ppp1r2                | 9.38±1.11  |
| protein phosphatase 1, regulatory (inhibitor) subunit 3B                                                               | Ppp1r3b               | 0.21±0.18  |
| protein phosphatase 1, regulatory (inhibitor) subunit 7                                                                | Ppp1r7                | 1.6±0.01   |
| protein phosphatase 1, regulatory (inhibitor) subunit 8 (predicted)                                                    | Ppp1r8_predicted      | 2.35±0.55  |
| protein phosphatase 1, regulatory subunit 10                                                                           | Ppp1r10               | 0.38±0.04  |
| protein phosphatase 1, regulatory subunit 3D                                                                           | Ppp1r3d               | 0.61±0.18  |
| protein phosphatase 1, regulatory subunit 9B                                                                           | Ppp1r9b               | 0.23±0.04  |
| protein phosphatase 1A, magnesium dependent, alpha isoform                                                             | Ppm1a                 | 1.24±0.16  |
| protein phosphatase 1B, magnesium dependent, beta isoform                                                              | Ppm1b                 | 5.98±1.56  |
| protein phosphatase 1D magnesium-dependent, delta isoform (predicted)                                                  | Ppm1d_predicted       | 2.27±0.24  |
| protein phosphatase 1G (formerly 2C), magnesium-dependent, gamma isoform                                               | Ppm1g                 | 3.73±0.12  |
| protein phosphatase 1H (PP2C domain containing)                                                                        | Ppm1h                 | 0.87±0.03  |
| protein phosphatase 1K (PP2C domain containing) (predicted)                                                            | Ppm1K_predicted       | 0.29±0.01  |
| protein phosphatase 2 (formerly 2A), catalytic subunit, alpha isoform                                                  | Ppp2ca                | 13.35±0.32 |
| protein phosphatase 2 (formerly 2A), catalytic subunit, beta isoform                                                   | Ppp2cb                | 15.89±1.2  |
| protein phosphatase 2 (formerly 2A), regulatory subunit A (PR 65), alpha isoform                                       | Ppp2r1a               | 5.77±0.04  |
| protein phosphatase 2 (formerly 2A), regulatory subunit B (PR 52), alpha isoform                                       | Ppp2r2a               | 2.97±0.26  |
| protein phosphatase 2 (formerly 2A), regulatory subunit B (PR 52), beta isoform                                        | Ppp2r2b               | 1.04±0.34  |
| protein phosphatase 2 (formerly 2A), regulatory subunit B', alpha                                                      | Ppp2r3a               | 14.59±6.03 |
| protein phosphatase 2, regulatory subunit B (B56), alpha isoform (predicted)                                           | Ppp2r5a_predicted     | 18.21±3.13 |
| protein phosphatase 2, regulatory subunit B (B56), beta isoform                                                        | Ppp2r5b               | 0.72±0.46  |
| protein phosphatase 2, regulatory subunit B (B56), delta isoform                                                       | Ppp2r5d               | 1.53±0.39  |
| protein phosphatase 2, regulatory subunit B (B56), epsilon isoform (predicted)                                         | Ppp2r5e_predicted     | 4.06±0.21  |
| protein phosphatase 2, regulatory subunit B' gamma isoform                                                             | Ppp2r5c               | 0.82±0.41  |
| protein phosphatase 2, regulatory subunit B, delta isoform                                                             | Ppp2r2d               | 4.41±0.71  |
| protein phosphatase 2, regulatory subunit B', gamma                                                                    | Ppp2r3c               | 0.81±0.07  |
| protein phosphatase 2A, regulatory subunit B (PR 53) (predicted)                                                       | Ppp2r4_predicted      | 3.14±0.76  |
| protein phosphatase 2C, magnesium dependent, catalytic subunit                                                         | Ppm2c                 | 0.63±0.31  |
| protein phosphatase 3, catalytic subunit, alpha isoform                                                                | Ppp3ca                | 3.69±0.33  |
| protein phosphatase 3, catalytic subunit, beta isoform                                                                 | Ppp3cb                | 2.92±0.45  |
| protein phosphatase 3, catalytic subunit, gamma isoform                                                                | Ppp3cc                | 1±0.21     |
| protein phosphatase 3, regulatory subunit B, alpha isoform (calcineurin B, type I)                                     | Ppp3r1                | 2.95±0.34  |
| protein phosphatase 4, catalytic subunit                                                                               | Ppp4c                 | 1.29±0.29  |
| protein phosphatase 4, regulatory subunit 1                                                                            | Ppp4r1                | 2.16±0.22  |
| protein phosphatase 4, regulatory subunit 1-like                                                                       | Ppp4r1l               | 0.39±0.26  |
| protein phosphatase 4, regulatory subunit 2 (predicted)                                                                | Ppp4r2_predicted      | 6.69±0.15  |
| protein phosphatase 5, catalytic subunit                                                                               | Ppp5c                 | 1.65±0.13  |
| protein phosphatase 6, catalytic subunit                                                                               | Ppp6c                 | 2.12±0.15  |
| protein phosphatase methyltransferase 1                                                                                | Ppme1                 | 3.04±0.56  |
| protein regulator of cytokinesis 1 (predicted)                                                                         | Prc1_predicted        | 1.53±0.1   |
| protein serine kinase H1 (predicted)                                                                                   | Pskh1_predicted       | 1.05±0.04  |
| protein tyrosine kinase 2 beta                                                                                         | Ptk2b                 | 0.22±0.02  |
| protein tyrosine phosphatase 4a1                                                                                       | Ptp4a1                | 5.46±2.16  |
| protein tyrosine phosphatase 4a2                                                                                       | Ptp4a2                | 9.94±0.42  |
| protein tyrosine phosphatase, mitochondrial 1                                                                          | Ptpmt1                | 10.31±2.3  |
| protein tyrosine phosphatase, non-receptor type 1                                                                      | Ptpn1                 | 0.62±0.25  |
| Protein tyrosine phosphatase, non-receptor type 11                                                                     | Ptpn11                | 4.34±0.86  |
| protein tyrosine phosphatase, non-receptor type 12                                                                     | Ptpn12                | 4.31±0.41  |
| protein tyrosine phosphatase, non-receptor type 13                                                                     | Ptpn13                | 2.96±0.06  |
| Protein tyrosine phosphatase, non-receptor type 14 (predicted)                                                         | Ptpn14_predicted      | 0.98±1.15  |
| protein tyrosine phosphatase, non-receptor type 18                                                                     | Ptpn18                | 13.74±2.88 |
| protein tyrosine phosphatase, non-receptor type 2                                                                      | Ptpn2                 | 1.99±0.46  |
| protein tyrosine phosphatase, non-receptor type 21                                                                     | Ptpn21                | 0.55±0.11  |
| protein tyrosine phosphatase, non-receptor type 23                                                                     | Ptpn23                | 0.82±0.46  |
| protein tyrosine phosphatase, non-receptor type 3                                                                      | Ptpn3                 | 3.18±1.16  |
| protein tyrosine phosphatase, non-receptor type 6                                                                      | Ptpn6                 | 0.36±0.03  |
| protein tyrosine phosphatase, receptor type, A                                                                         | Ptpra                 | 1.47±0.11  |
| protein tyrosine phosphatase, receptor type, F                                                                         | Ptprf                 | 2.77±2.56  |
| protein tyrosine phosphatase, receptor type, f polypeptide (PTPRF), interacting protein, alpha 1 (predicted)           | Ppfia1_predicted      | 0.93±0.51  |
| protein tyrosine phosphatase, receptor type, J                                                                         | PtpRJ                 | 1.06±0.38  |
| protein tyrosine phosphatase, receptor type, K, extracellular region                                                   | PtpRK                 | 1.67±0.72  |
| Protein tyrosine phosphatase, receptor type, M                                                                         | PtpRM                 | 1.37±0.55  |
| protein tyrosine phosphatase, receptor type, R                                                                         | PtpRR                 | 5.88±0.9   |
| protein tyrosine phosphatase-like (proline instead of catalytic arginine), member b (predicted)                        | LOC690040 /// Ptplb_p | 2.28±0.24  |
| protein-kinase, interferon-inducible double stranded RNA dependent inhibitor, repressor of (P58 repressor) (predicted) | Prkrii_predicted      | 1.4±0.04   |
| protein-L-isoaspartate (D-aspartate) O-methyltransferase 1                                                             | Pcmt1                 | 1.77±0.56  |
| protein-L-isoaspartate (D-aspartate) O-methyltransferase domain containing 2 (predicted)                               | Pcmt2_predicted       | 7.45±1.17  |
| protein-O-mannosyltransferase 1                                                                                        | Pomt1                 | 0.68±0.23  |
| protein-O-mannosyltransferase 2                                                                                        | Pomt2                 | 3.43±0.75  |

|                                                                                                              |                        |            |
|--------------------------------------------------------------------------------------------------------------|------------------------|------------|
| proteolipid protein (myelin) 1                                                                               | Plp1                   | 0.34±0.01  |
| proteolipid protein 2                                                                                        | Plp2                   | 3.3±2.04   |
| prothymosin alpha                                                                                            | Ptma                   | 19.5±1.45  |
| Protocadherin 1 (cadherin-like 1) (predicted)                                                                | Pcdh1_predicted        | 1.02±0.45  |
| protocadherin 19 (predicted)                                                                                 | Pcdh19_predicted       | 0.87±0.2   |
| protocadherin 3                                                                                              | Pcdh3                  | 0.42±0.11  |
| protocadherin alpha 4                                                                                        | Pcdha1 /// Pcdha10 /// | 10.38±0.05 |
| protocadherin beta 13                                                                                        | Pcdhb13                | 0.26±0     |
| protocadherin gamma subfamily C, 3                                                                           | Pcdhga1 /// Pcdhga10 / | 1.67±0.15  |
| protoporphyrinogen oxidase (predicted)                                                                       | Ppox_predicted         | 0.89±0.12  |
| proviral integration site 3                                                                                  | Pim3                   | 12.68±2.88 |
| PRP18 pre-mRNA processing factor 18 homolog (yeast)                                                          | Prpf18                 | 1.88±0.24  |
| PRP19/PSO4 pre-mRNA processing factor 19 homolog (S. cerevisiae)                                             | Prpf19                 | 2.39±0.09  |
| PRP3 pre-mRNA processing factor 3 homolog (yeast) (predicted)                                                | Prpf3_predicted        | 1.62±0.06  |
| PRP38 pre-mRNA processing factor 38 (yeast) domain containing A (predicted)                                  | Prpf38a_predicted      | 1.03±0.39  |
| PRP38 pre-mRNA processing factor 38 (yeast) domain containing B                                              | Prpf38b                | 0.45±0.01  |
| PRP39 pre-mRNA processing factor 39 homolog (yeast) (predicted)                                              | Prpf39_predicted       | 2.66±0.14  |
| PRP4 pre-mRNA processing factor 4 homolog (yeast)                                                            | Prpf4                  | 1.09±0.23  |
| PRP4 pre-mRNA processing factor 4 homolog B (yeast)                                                          | Prpf4b                 | 2.71±0.77  |
| PRP40 pre-mRNA processing factor 40 homolog A (S. cerevisiae)                                                | Prpf40a                | 0.63±0.11  |
| PRP6 pre-mRNA splicing factor 6 homolog (S. cerevisiae)                                                      | Prpf6                  | 1.8±0.19   |
| pseudouridine synthase 1                                                                                     | Pus1                   | 1.41±0.46  |
| PTC7 protein phosphatase homolog (S. cerevisiae)                                                             | Pptc7                  | 4.11±0.49  |
| PTEN induced putative kinase 1 (predicted)                                                                   | Pink1_predicted        | 10.4±0.25  |
| pterin 4 alpha carbinolamine dehydratase/dimerization cofactor of hepatocyte nuclear factor 1 alpha (TCF1) 1 | Pcbd1                  | 8.41±0.19  |
| PTK2 protein tyrosine kinase 2                                                                               | Ptk2                   | 1.69±0.28  |
| PTK7 protein tyrosine kinase 7 (predicted)                                                                   | Ptk7_predicted         | 0.93±0.62  |
| PTPRF interacting protein, binding protein 1 (liprin beta 1) (predicted)                                     | Ppfbp1_predicted       | 8.07±0.43  |
| Pumilio 1 (Drosophila) (predicted)                                                                           | Pum1_predicted         | 3.2±0.89   |
| pumilio 2 (Drosophila)                                                                                       | Pum2                   | 7.43±1.55  |
| purine rich element binding protein A (predicted)                                                            | Pura_predicted         | 6.35±0.85  |
| purine rich element binding protein B                                                                        | Purb                   | 1.37±0.36  |
| purinergic receptor P2X, ligand-gated ion channel 4                                                          | P2rx4                  | 1.04±0.07  |
| purinergic receptor P2X, ligand-gated ion channel, 3                                                         | P2rx3                  | 0.22±0.12  |
| purine-rich element binding protein G (predicted)                                                            | Purg_predicted         | 1.46±0.02  |
| putative GTP-binding protein                                                                                 | LOC293589              | 2.44±0.03  |
| putative homeodomain transcription factor 1                                                                  | Phtf1                  | 1.82±0.02  |
| putative homeodomain transcription factor 2 (predicted)                                                      | Phtf2_predicted        | 1.3±0.19   |
| putative nucleic acid binding protein RY-1                                                                   | Ry1                    | 7.38±0.18  |
| putative scaffolding protein POSH                                                                            | Sh3md2                 | 0.39±0.05  |
| putative small membrane protein NID67                                                                        | Nid67                  | 1.06±1.07  |
| putative UA20 protein                                                                                        | Ua20                   | 8.73±1.17  |
| PWWP domain containing 2 (predicted)                                                                         | Pwwp2_predicted        | 0.64±0.41  |
| PX domain containing serine/threonine kinase                                                                 | Pxx                    | 3.7±0.51   |
| pygopus 2                                                                                                    | Pygo2                  | 0.82±0.27  |
| pyridoxine 5'-phosphate oxidase                                                                              | Pnpo                   | 3.28±0.33  |
| pyroglutamyl-peptidase I                                                                                     | Pqpep1                 | 5.35±1.48  |
| pyrophosphatase (inorganic) 1                                                                                | Ppa1                   | 2.48±0.85  |
| pyrophosphatase (inorganic) 2 (predicted)                                                                    | Ppa2_predicted         | 6.46±0.89  |
| pyrroline-5-carboxylate reductase family, member 2                                                           | Pycr2                  | 0.9±0.5    |
| pyrroline-5-carboxylate reductase-like                                                                       | Pycr1                  | 4.16±0.25  |
| pyruvate carboxylase                                                                                         | Pcx                    | 0.68±0.02  |
| pyruvate dehydrogenase (lipoamide) beta                                                                      | Pdhb                   | 18.78±3.09 |
| pyruvate dehydrogenase complex, component X                                                                  | Pdhx                   | 2.65±0.8   |
| pyruvate dehydrogenase E1 alpha 1                                                                            | Pdha1                  | 29.38±1.16 |
| pyruvate dehydrogenase kinase, isoenzyme 1                                                                   | Pdk1                   | 0.38±0.04  |
| pyruvate dehydrogenase kinase, isoenzyme 2                                                                   | Pdk2                   | 10.77±1.2  |
| pyruvate dehydrogenase kinase, isoenzyme 3                                                                   | Pdk3                   | 2.57±0.77  |
| pyruvate dehydrogenase kinase, isoenzyme 4                                                                   | Pdk4                   | 1.1±1.07   |
| pyruvate dehydrogenase phosphatase isoenzyme 2                                                               | Pdp2                   | 1.18±0.12  |
| pyruvate kinase, muscle                                                                                      | Pkm2                   | 16.41±3.48 |
| quaking                                                                                                      | Qk                     | 5.51±0.77  |
| quaking homolog, KH domain RNA binding (mouse) /// quaking                                                   | Qk /// Qki             | 2.61±0.06  |
| quiescinq Q6 sulfhydryl oxidase 2                                                                            | Qsox2                  | 0.67±0.08  |
| quinoid dihydropteridine reductase                                                                           | Qdpr                   | 2.42±1.34  |
| R3H domain 1 (binds single-stranded nucleic acids)                                                           | R3hdm1                 | 2.92±0.03  |
| R3H domain and coiled-coil containing 1 (predicted)                                                          | R3hcc1_predicted       | 1.94±0.23  |
| R3H domain containing 2                                                                                      | R3hdm2                 | 0.37±0.13  |
| Rab acceptor 1 (prenylated)                                                                                  | Rabac1                 | 11.6±1.77  |
| Rab geranylgeranyl transferase, a subunit                                                                    | Rabgga                 | 0.66±0.06  |
| RAB geranylgeranyl transferase, b subunit                                                                    | Rabggb                 | 8.28±2.75  |
| RAB GTPase activating protein 1                                                                              | Rabgap1                | 2.02±0.39  |
| RAB GTPase activating protein 1-like                                                                         | Rabgap1l               | 0.47±0.07  |
| RAB guanine nucleotide exchange factor (GEF) 1 (predicted)                                                   | Rabgef1_predicted      | 0.59±0.37  |
| RAB interacting factor                                                                                       | Rabif                  | 0.91±0.17  |
| Rab interacting lysosomal protein-like 2                                                                     | Rilpl2                 | 3.13±0.08  |
| RAB, member of RAS oncogene family-like 2A                                                                   | Rab12a                 | 3.19±1.39  |
| RAB, member of RAS oncogene family-like 3 (predicted)                                                        | Rab13_predicted        | 0.47±0.04  |
| RAB, member of RAS oncogene family-like 4 (predicted)                                                        | Rab14_predicted        | 0.73±0.48  |
| RAB, member of RAS oncogene family-like 5                                                                    | Rab15                  | 0.36±0.02  |
| RAB1, member RAS oncogene family                                                                             | Rab1                   | 22.82±4.98 |
| RAB10, member RAS oncogene family                                                                            | Rab10                  | 8.63±1.22  |
| RAB11 family interacting protein 4 (class II) (predicted)                                                    | Rab11fip4_predicted    | 2.42±0.29  |
| RAB11a, member RAS oncogene family                                                                           | Rab11a                 | 5.67±1.26  |
| RAB11B, member RAS oncogene family                                                                           | Rab11b                 | 8.85±0.21  |
| RAB12, member RAS oncogene family                                                                            | Rab12                  | 6.63±0.37  |
| RAB13, member RAS oncogene family                                                                            | Rab13                  | 0.9±0.18   |

|                                                                                  |                    |            |
|----------------------------------------------------------------------------------|--------------------|------------|
| RAB14, member RAS oncogene family                                                | Rab14              | 6.03±0.55  |
| RAB17, member RAS oncogene family                                                | Rab17              | 6.33±1.95  |
| RAB18, member RAS oncogene family                                                | Rab18              | 2.79±0.28  |
| RAB2, member RAS oncogene family                                                 | Rab2               | 18.72±1.15 |
| RAB20, member RAS oncogene family                                                | Rab20              | 0.75±1.06  |
| RAB21, member RAS oncogene family                                                | Rab21              | 3.45±1.47  |
| RAB22A, member RAS oncogene family (predicted)                                   | Rab22a_predicted   | 1.85±0.06  |
| RAB23, member RAS oncogene family (predicted)                                    | Rab23_predicted    | 1.38±0.24  |
| RAB24, member RAS oncogene family                                                | Rab24              | 1.39±0.36  |
| RAB25, member RAS oncogene family (predicted)                                    | Rab25_predicted    | 2.42±0.44  |
| RAB26, member RAS oncogene family                                                | Rab26              | 0.58±0.13  |
| RAB28, member RAS oncogene family                                                | Rab28              | 8.34±0.27  |
| RAB2B, member RAS oncogene family                                                | Rab2b              | 1.89±0.02  |
| RAB3 GTPase activating protein subunit 2                                         | Rab3gap2           | 1.42±0.12  |
| RAB31, member RAS oncogene family                                                | Rab31              | 0.51±0.29  |
| RAB32, member RAS oncogene family                                                | Rab32              | 0.98±0.17  |
| RAB33B, member of RAS oncogene family (predicted)                                | Rab33b_predicted   | 0.97±0.65  |
| RAB34, member of RAS oncogene family                                             | Rab34              | 2.66±0.38  |
| RAB35, member RAS oncogene family                                                | Rab35              | 2.57±0.15  |
| RAB3A interacting protein                                                        | Rab3ip             | 2.82±0.03  |
| RAB3A, member RAS oncogene family                                                | Rab3a              | 0.63±0.16  |
| RAB3D, member RAS oncogene family                                                | Rab3d              | 0.6±0.48   |
| Rab40b, member RAS oncogene family (predicted)                                   | Rab40b_predicted   | 0.57±0.28  |
| Rab40c, member RAS oncogene family                                               | Rab40c             | 1.04±0.29  |
| RAB4A, member RAS oncogene family                                                | Rab4a              | 2.59±0.03  |
| RAB4B, member RAS oncogene family                                                | Rab4b              | 1.1±0.05   |
| RAB5A, member RAS oncogene family                                                | Rab5a              | 7.06±2.23  |
| RAB5B, member RAS oncogene family (predicted)                                    | Rab5b_predicted    | 7.35±0.98  |
| RAB5C, member RAS oncogene family (predicted)                                    | Rab5c_predicted    | 2.94±0.66  |
| RAB6A, member RAS oncogene family                                                | Rab6a              | 5.95±0.35  |
| RAB7, member RAS oncogene family                                                 | Rab7               | 11.16±2.49 |
| RAB7, member RAS oncogene family-like 1                                          | Rab7l1             | 3.54±2.93  |
| RAB8A, member RAS oncogene family                                                | Rab8a              | 4.14±0.56  |
| RAB8B, member RAS oncogene family                                                | Rab8b              | 0.43±0.22  |
| Rab9 effector protein with kelch motifs                                          | Rabepk             | 1.09±0.1   |
| RAB9, member RAS oncogene family                                                 | Rab9               | 5.82±3.26  |
| rabaptin, RAB GTPase binding effector protein 1                                  | Rabep1             | 0.89±0.12  |
| rabaptin, RAB GTPase binding effector protein 2                                  | Rabep2             | 0.38±0     |
| Rac GTPase-activating protein 1 (predicted)                                      | Racgap1_predicted  | 0.46±0     |
| RAD1 homolog (S. pombe) (predicted)                                              | Rad1_predicted     | 0.54±0.19  |
| RAD17 homolog (S. pombe)                                                         | Rad17              | 1.21±0.26  |
| RAD21 homolog (S. pombe)                                                         | Rad21              | 12.67±0.46 |
| RAD23a homolog (S. cerevisiae)                                                   | Rad23a             | 0.66±0.36  |
| RAD23b homolog (S. cerevisiae)                                                   | Rad23b             | 5.62±0.6   |
| RAD50 homolog (S. cerevisiae)                                                    | Rad50              | 1.25±0.21  |
| RAD51 homolog (S. cerevisiae)                                                    | Rad51              | 0.77±0.17  |
| Rad51 homolog c (S. cerevisiae)                                                  | Rad51c             | 0.78±0.19  |
| RAD52 homolog (S. cerevisiae) (predicted)                                        | Rad52_predicted    | 0.26±0.24  |
| RAD52 motif 1 (predicted)                                                        | Rdm1_predicted     | 0.88±0.11  |
| radial spoke head 1 homolog (Chlamydomonas)                                      | Rsph1              | 0.67±0.14  |
| radical fringe gene homolog (Drosophila)                                         | Rfng               | 1.8±0.2    |
| radixin                                                                          | Rdx                | 4.27±0.79  |
| RAE1 RNA export 1 homolog (S. pombe)                                             | Rae1               | 1.21±0.33  |
| ralA binding protein 1                                                           | Ralbp1             | 3.37±0.58  |
| RalBP1 associated Eps domain containing protein (predicted)                      | Reps1_predicted    | 1.12±0.25  |
| RAN binding protein 10 (predicted)                                               | Ranbp10_predicted  | 1.25±0.23  |
| RAN binding protein 2                                                            | Ranbp2             | 2.14±1.12  |
| RAN binding protein 3                                                            | Ranbp3             | 2.02±0.16  |
| RAN binding protein 5 (predicted)                                                | Ranbp5_predicted   | 1.59±0.18  |
| RAN binding protein 6 (predicted)                                                | Ranbp6_predicted   | 1.18±0.15  |
| RAN GTPase activating protein 1                                                  | Rangap1            | 1.19±0.3   |
| RAN guanine nucleotide release factor                                            | Rangrf             | 4.97±1.16  |
| RAN, member RAS oncogene family                                                  | Ran                | 11.55±1.39 |
| RanBP-type and C3HC4-type zinc finger containing 1                               | Rbck1              | 2.26±0.67  |
| Rap guanine nucleotide exchange factor (GEF) 2 (predicted)                       | Rapgef2_predicted  | 1.41±1.35  |
| Rap guanine nucleotide exchange factor (GEF) 3                                   | Rapgef3            | 0.23±0.11  |
| Rap guanine nucleotide exchange factor (GEF)-like 1                              | Rapgef1            | 0.98±0.32  |
| Rap1 GTPase-activating protein                                                   | Rap1gap            | 15.46±0.45 |
| Rap1 interacting factor 1 homolog (yeast)                                        | Rif1               | 0.59±0     |
| RAP1, GTP-GDP dissociation stimulator 1 (predicted)                              | Rap1gds1_predicted | 1.11±0.17  |
| Rap2 interacting protein                                                         | Rap2ip             | 0.51±0.08  |
| RAR-related orphan receptor alpha (predicted)                                    | Rora_predicted     | 1.01±0.53  |
| RAR-related orphan receptor C /// leucine rich repeat and Ig domain containing 4 | Lingo4 /// Rorc    | 0.58±0.05  |
| Ras and Rab interactor 2 (predicted)                                             | Rin2_predicted     | 4.91±1.69  |
| Ras association (RalGDS/AF-6) domain family 1                                    | Rassf1             | 1.72±1.82  |
| Ras association (RalGDS/AF-6) domain family 3 (predicted)                        | Rassf3_predicted   | 4.29±0.03  |
| Ras association (RalGDS/AF-6) domain family 5                                    | Rassf5             | 0.52±0.16  |
| Ras association (RalGDS/AF-6) domain family 7 (predicted)                        | Rassf7_predicted   | 4.17±0.66  |
| Ras association (RalGDS/AF-6) domain family member 6                             | Rassf6             | 5.92±0.48  |
| RAS guanyl releasing protein 1                                                   | Rasgrp1            | 0.39±0.26  |
| Ras homolog enriched in brain                                                    | Rheb               | 14.53±2.05 |
| ras homolog gene family, member A                                                | Rhoa               | 11.77±1.76 |
| ras homolog gene family, member B                                                | Rheb               | 11.35±5.67 |
| ras homolog gene family, member D (predicted)                                    | Rhod_predicted     | 4.96±0.5   |
| Ras homolog gene family, member G                                                | Rhoq               | 1.31±0.02  |
| ras homolog gene family, member Q                                                | Rhoq               | 2.18±0.08  |
| ras homolog gene family, member T2                                               | Rhot2              | 2.34±0.67  |

|                                                                                       |                      |            |
|---------------------------------------------------------------------------------------|----------------------|------------|
| RAS p21 protein activator 1                                                           | Rasa1                | 0.37±0.39  |
| RAS related protein 1b                                                                | Rap1b                | 3.36±0.14  |
| ras responsive element binding protein 1 (predicted)                                  | Rreb1_predicted      | 1.82±0.56  |
| RAS, dexamethasone-induced 1                                                          | Rasd1                | 1.82±1.08  |
| RAS, guanyl releasing protein 2                                                       | Rasgrp2              | 0.53±0.04  |
| Ras-GTPase-activating protein SH3-domain binding protein 1                            | G3bp1                | 3.41±0.28  |
| Ras-like without CAAX 1 (predicted)                                                   | Rit1_predicted       | 0.23±0.1   |
| Ras-related C3 botulinum toxin substrate 1                                            | Rac1                 | 7.92±0.37  |
| Ras-related GTP binding A                                                             | Rraga                | 5.63±1.6   |
| Ras-related GTP binding B                                                             | Rraqb                | 0.26±0.26  |
| Ras-related GTP binding C (predicted)                                                 | Rragc_predicted      | 4.38±0.44  |
| Ras-related GTP binding D (predicted)                                                 | Rragd_predicted      | 3.19±0.05  |
| RAS-related protein 1a                                                                | Rap1a                | 4.92±0.65  |
| RB1-inducible coiled-coil 1 (predicted)                                               | Rb1cc1_predicted     | 3.1±0.22   |
| RBSC-skeletrophin                                                                     | LOC474147            | 0.6±0.01   |
| rcd1 (required for cell differentiation) homolog 1 (S. pombe)                         | Rqcd1                | 0.49±0.09  |
| RCE1 homolog, prenyl protein peptidase (S. cerevisiae)                                | Rce1                 | 1.98±0.02  |
| rearranged L-myc fusion sequence (predicted)                                          | Rlf_predicted        | 0.42±0.14  |
| receptor (TNFRSF)-interacting serine-threonine kinase 1 (predicted)                   | Ripk1_predicted      | 1.48±0.22  |
| receptor accessory protein 4                                                          | Reep4                | 1.19±0.3   |
| receptor accessory protein 5 (predicted)                                              | Reep5_predicted      | 5.63±1.04  |
| receptor accessory protein 6                                                          | Reep6                | 0.69±0.24  |
| receptor interacting protein kinase 5                                                 | Ripk5                | 1.16±0.2   |
| receptor-associated protein of the synapse (predicted)                                | Rapsn_predicted      | 1.85±0.37  |
| receptor-interacting serine-threonine kinase 4 (predicted)                            | Ripk4_predicted      | 2.76±0.04  |
| receptor-like tyrosine kinase                                                         | Ryk                  | 1.5±0.51   |
| recombination activating gene 1 activating protein 1 (predicted)                      | Rag1ap1_predicted    | 2.64±0.06  |
| recombining binding protein suppressor of hairless (Drosophila) (predicted)           | LOC679028 /// Rbbsuh | 0.66±0.02  |
| RecQ protein-like                                                                     | Recq1                | 2.55±0.06  |
| RecQ protein-like 5 (predicted)                                                       | Recq15_predicted     | 0.47±0.07  |
| regulator of calcineurin 1                                                            | Rcan1                | 0.68±1.15  |
| regulator of calcineurin 2                                                            | Rcan2                | 1.63±0.09  |
| regulator of chromosome condensation (RCC1) and BTB (POZ) domain containing protein 1 | Rcbb1                | 0.48±0.17  |
| regulator of chromosome condensation (RCC1) and BTB (POZ) domain containing protein 2 | Rcbb2                | 1.24±0.16  |
| regulator of chromosome condensation 2 (predicted)                                    | Rcc2_predicted       | 1.32±0.06  |
| regulator of G-protein signaling 3                                                    | Rgs3                 | 1.06±0.28  |
| regulator of telomere elongation helicase 1                                           | Rtel1                | 0.88±0.25  |
| regulatory factor X domain containing 2 homolog (human)                               | Rfxdc2               | 2.02±0.14  |
| regulatory factor X, 1 (influences HLA class II expression) (predicted)               | Rfx1_predicted       | 1.33±0.16  |
| regulatory factor X, 5 (influences HLA class II expression) (predicted)               | Rfx5_predicted       | 0.67±0.07  |
| regulatory factor X-associated protein                                                | Rfxap                | 0.9±0.34   |
| related RAS viral (r-ras) oncogene homolog 2                                          | Rras2                | 6.64±0.58  |
| remodeling and spacing factor 1                                                       | Rsf1                 | 0.82±0.32  |
| renal tumor antigen                                                                   | Rage                 | 1.08±0.29  |
| replication factor C (activator 1) 1                                                  | Rfc1                 | 0.85±0.08  |
| replication factor C (activator 1) 2                                                  | Rfc2                 | 0.92±0.13  |
| replication factor C (activator 1) 3                                                  | Rfc3                 | 0.69±0.02  |
| replication factor C (activator 1) 4 (predicted)                                      | Rfc4_predicted       | 1.25±0.19  |
| replication factor C (activator 1) 5 (predicted)                                      | Rfc5_predicted       | 0.23±0.06  |
| Replication factor C 1                                                                | Recc1                | 0.9±0.03   |
| Replication protein A1                                                                | Rpa1                 | 7.54±0.99  |
| replication protein A2                                                                | Rpa2                 | 0.87±0.06  |
| replication protein A3 (predicted)                                                    | Rpa3_predicted       | 2.04±0.3   |
| required for meiotic nuclear division 5 homolog A (S. cerevisiae)                     | Rmnd5a               | 5.34±0.27  |
| RER1 retention in endoplasmic reticulum 1 homolog (S. cerevisiae)                     | Rer1                 | 6.14±0.01  |
| resistance to inhibitors of cholinesterase 8 homolog (C. elegans)                     | Ric8                 | 1.62±0.48  |
| REST corepressor 1 (predicted)                                                        | Rcor1_predicted      | 1.23±0.36  |
| reticulocalbin 2                                                                      | Rcn2                 | 1.96±0.55  |
| reticulon 3                                                                           | Rtn3                 | 13.71±2.13 |
| reticulon 4                                                                           | Rtn4                 | 10.46±5.86 |
| reticulon 4 interacting protein 1                                                     | Rtn4ip1              | 2.22±0.03  |
| reticulon 4 receptor                                                                  | Rtn4r                | 0.58±0.18  |
| reticulon 4 receptor-like 1                                                           | Rtn4r1               | 1.6±0.37   |
| retinitis pigmentosa 2 homolog (human) (predicted)                                    | Rp2h_predicted       | 0.33±0.21  |
| Retinitis pigmentosa 9 homolog (human) (predicted)                                    | Rp9h_predicted       | 1.88±0.68  |
| retinoblastoma 1                                                                      | Rb1                  | 2.28±0.74  |
| retinoblastoma binding protein 4                                                      | Rbbp4                | 4.79±0.22  |
| retinoblastoma binding protein 5 (predicted)                                          | Rbbp5_predicted      | 1.12±0.07  |
| retinoblastoma binding protein 6                                                      | Rbbp6                | 1.95±0.92  |
| retinoblastoma binding protein 7                                                      | Rbbp7                | 11.2±1.91  |
| retinoblastoma binding protein 9                                                      | Rbbp9                | 1.78±0.89  |
| retinoblastoma-like 2                                                                 | Rbl2                 | 2.95±0.17  |
| retinoic acid induced 1 (predicted)                                                   | Rai1_predicted       | 1.65±0.31  |
| retinoic acid induced 12                                                              | Rai12                | 1.93±0.36  |
| retinoic acid receptor, beta                                                          | Rarb                 | 1.38±0.21  |
| Retinoid X receptor alpha                                                             | Rxra                 | 1.16±0.52  |
| retinoid X receptor beta                                                              | Rxrb                 | 0.87±0.01  |
| Retinol dehydrogenase 10 (all-trans)                                                  | Rdh10                | 0.35±0.03  |
| retinol dehydrogenase 11                                                              | Rdh11                | 1.68±0.36  |
| Retinol dehydrogenase 13 (all-trans and 9-cis) (predicted)                            | Rdh13_predicted      | 2.34±0.61  |
| retinol saturase (all trans retinol 13,14 reductase)                                  | Retsat               | 7.13±0.7   |
| REV1 homolog (S. cerevisiae)                                                          | Rev1                 | 1.01±0.7   |
| REV3-like, catalytic subunit of DNA polymerase zeta RAD54 like (S. cerevisiae)        | Rev3l                | 1.89±0.1   |
| reversion-inducing-cysteine-rich protein with kazal motifs (predicted)                | Reck_predicted       | 0.29±1.56  |
| REX1, RNA exonuclease 1 homolog (S. cerevisiae)                                       | Rexo1                | 0.23±0.15  |
| REX2, RNA exonuclease 2 homolog (S. cerevisiae)                                       | Rexo2                | 4.13±1.13  |
| REX4, RNA exonuclease 4 homolog (S. cerevisiae)                                       | Rexo4                | 1.74±0.13  |

|                                                                                                                                |                      |            |
|--------------------------------------------------------------------------------------------------------------------------------|----------------------|------------|
| RFT1 homolog ( <i>S. cerevisiae</i> ) (predicted)                                                                              | Rft1_predicted       | 1.82±0.42  |
| RGD1559909 (predicted)                                                                                                         | RGD1559909_predicte  | 1.57±0.25  |
| RGD1560398 (predicted)                                                                                                         | RGD1560398_predicte  | 1.69±0.54  |
| RGD1560566 (predicted)                                                                                                         | RGD1560566_predicte  | 1.94±0.18  |
| RGD1561796 (predicted)                                                                                                         | RGD1561796_predicte  | 0.64±0.08  |
| RGD1561797 (predicted)                                                                                                         | RGD1561797_predicte  | 0.93±0.25  |
| RGD1562012 (predicted)                                                                                                         | RGD1562012_predicte  | 2.03±0.48  |
| RGD1562114 (predicted)                                                                                                         | RGD1562114_predicte  | 1.31±0.51  |
| RGD1562339 (predicted)                                                                                                         | RGD1562339_predicte  | 0.42±0     |
| RGD1563547 (predicted)                                                                                                         | RGD1563547_predicte  | 6.99±0.35  |
| RGD1563912 (predicted)                                                                                                         | RGD1563912_predicte  | 6.34±0.49  |
| RGD1564379 (predicted)                                                                                                         | RGD1564379_predicte  | 2.61±0.12  |
| RGD1564450 (predicted)                                                                                                         | RGD1564450_predicte  | 0.55±0.15  |
| RGD1564491 (predicted)                                                                                                         | RGD1564491_predicte  | 0.24±0.05  |
| RGD1564792 (predicted)                                                                                                         | RGD1564792_predicte  | 0.66±0.08  |
| RGD1564859 (predicted)                                                                                                         | RGD1564859_predicte  | 3.58±1.26  |
| RGD1564982 (predicted)                                                                                                         | RGD1564982_predicte  | 1.38±0.5   |
| RGD1565210 (predicted)                                                                                                         | RGD1565210_predicte  | 2.47±1.08  |
| RGD1565616 (predicted)                                                                                                         | RGD1565616_predicte  | 2.82±0.42  |
| RGD1565641 (predicted)                                                                                                         | RGD1565641_predicte  | 2.97±1.47  |
| RGD1565784 (predicted)                                                                                                         | RGD1565784_predicte  | 1.57±0.44  |
| RGD1566118 (predicted)                                                                                                         | RGD1566118_predicte  | 1.75±1.17  |
| RGD1566320 (predicted)                                                                                                         | RGD1566320_predicte  | 2.08±0.61  |
| RGM domain family, member A (predicted)                                                                                        | Rgma_predicted       | 0.53±0.08  |
| Rho family GTPase 3                                                                                                            | Rnd3                 | 0.23±0.79  |
| Rho GDP dissociation inhibitor (GDI) alpha                                                                                     | Arhgdia              | 5.89±0.89  |
| Rho GTPase activating protein 10                                                                                               | Arhgap10             | 1.21±0.09  |
| Rho GTPase activating protein 11A                                                                                              | Arhgap11a            | 1.05±0.24  |
| Rho GTPase activating protein 12 (predicted)                                                                                   | Arhgap12_predicted   | 0.95±0.52  |
| Rho GTPase activating protein 17                                                                                               | Arhgap17             | 0.89±1.15  |
| Rho GTPase activating protein 18 (predicted)                                                                                   | Arhgap18_predicted   | 3.03±0.46  |
| Rho GTPase activating protein 21 (predicted)                                                                                   | Arhgap21_predicted   | 1.13±0.6   |
| Rho GTPase activating protein 22 (predicted)                                                                                   | Arhgap22_predicted   | 3.18±0.99  |
| Rho GTPase activating protein 24                                                                                               | Arhgap24             | 24.21±10.8 |
| Rho GTPase activating protein 27                                                                                               | Arhgap27             | 0.76±0.1   |
| Rho GTPase activating protein 5                                                                                                | Arhgap5              | 2.61±0.11  |
| Rho GTPase activating protein 8                                                                                                | Arhgap8              | 0.28±0.17  |
| Rho GTPase-activating protein                                                                                                  | Grit                 | 0.93±0.11  |
| Rho guanine nucleotide exchange factor (GEF) 1                                                                                 | Arhgef1              | 1.62±0.04  |
| Rho guanine nucleotide exchange factor (GEF) 12                                                                                | Arhgef12             | 0.58±0.42  |
| Rho guanine nucleotide exchange factor (GEF) 17 (predicted)                                                                    | Arhgef17_predicted   | 0.88±0.31  |
| Rho guanine nucleotide exchange factor (GEF) 19 (predicted)                                                                    | Arhgef19_predicted   | 0.76±0.08  |
| Rho guanine nucleotide exchange factor (GEF) 3 (predicted)                                                                     | Arhgef3_predicted    | 1.68±0.18  |
| Rho guanine nucleotide exchange factor (GEF) 5                                                                                 | Arhgef5              | 0.74±0.1   |
| Rho guanine nucleotide exchange factor 7                                                                                       | Arhgef7              | 1.52±0.46  |
| rho/rac guanine nucleotide exchange factor (GEF) 18 (predicted)                                                                | Arhgef18_predicted   | 7.53±1.35  |
| rho/rac guanine nucleotide exchange factor (GEF) 2                                                                             | Arhgef2              | 1.45±0.03  |
| Rho-associated coiled-coil forming kinase 2                                                                                    | Rock2                | 0.26±0.16  |
| Rho-guanine nucleotide exchange factor (predicted)                                                                             | Rgnef_predicted      | 1.98±0.72  |
| rhomboid 5 homolog 2 ( <i>Drosophila</i> )                                                                                     | Rhbdf2               | 0.4±0.1    |
| rhomboid domain containing 2                                                                                                   | Rhbdd2               | 1.36±0.38  |
| rhomboid domain containing 3                                                                                                   | Rhbdd3               | 0.41±0.11  |
| rhomboid family 1 ( <i>Drosophila</i> )                                                                                        | Rhbdf1               | 0.55±0.71  |
| rhophilin, Rho GTPase binding protein 2 (predicted)                                                                            | Rhpn2_predicted      | 1.44±0     |
| rhotekin                                                                                                                       | Rtkn                 | 1.63±0.03  |
| riboflavin kinase /// similar to riboflavin kinase (predicted)                                                                 | Rfk /// RGD1563242_p | 8.48±1.94  |
| ribokinase (predicted)                                                                                                         | Rbks_predicted       | 0.91±0.11  |
| ribonuclease H1                                                                                                                | Rnaseh1              | 0.52±0.23  |
| ribonuclease H2, large subunit                                                                                                 | Rnaseh2a             | 5.12±0.75  |
| ribonuclease H2, subunit B                                                                                                     | Rnaseh2b             | 0.82±0.05  |
| ribonuclease III, nuclear                                                                                                      | Rnasen               | 1.86±0.32  |
| Ribonuclease L (2',5'-oligoadenylate synthetase-dependent)                                                                     | Rnasel               | 1.19±0.08  |
| ribonuclease P 14 subunit (human)                                                                                              | Rpp14                | 2.58±0.36  |
| ribonuclease P 21 subunit (human) /// RT1 class I, M10, gene 1                                                                 | Rpp21 /// RT1-M10-1  | 2.9±0.69   |
| ribonuclease P 40 subunit (human)                                                                                              | Rpp40                | 0.5±0.14   |
| ribonuclease P/MRP 30 /// similar to Ribonuclease P protein subunit p30 (RNaseP protein p30) (RNase P subunit 2)               | LOC687772 /// Rpp30  | 0.25±0.04  |
| ribonuclease T2 (predicted)                                                                                                    | Rnaset2_predicted    | 9.06±0.95  |
| ribonuclease, RNase K                                                                                                          | Rnasek               | 10.92±1.03 |
| ribonuclease/angiogenin inhibitor 1                                                                                            | Rnh1                 | 4.46±0.15  |
| ribonucleic acid binding protein S1                                                                                            | Rnps1                | 3.93±0.02  |
| ribonucleoprotein, PTB-binding 1                                                                                               | Raver1               | 1.2±0.04   |
| ribonucleoprotein, PTB-binding 2                                                                                               | Raver2               | 0.93±0.19  |
| ribonucleotide reductase M1                                                                                                    | Rrm1                 | 3.16±0.96  |
| ribonucleotide reductase M2                                                                                                    | Rrm2                 | 2.73±0.07  |
| ribophorin I                                                                                                                   | Rpn1                 | 9.23±0.51  |
| ribophorin II                                                                                                                  | Rpn2                 | 7.99±1.01  |
| ribose 5-phosphate isomerase A (predicted)                                                                                     | Rpia_predicted       | 2.32±1.09  |
| ribose-phosphate pyrophosphokinase I -like                                                                                     | LOC314140            | 1.68±0.71  |
| ribosomal L1 domain containing 1                                                                                               | Rsl1d1               | 1.89±0.65  |
| ribosomal protein L10                                                                                                          | Rpl10                | 22.36±4.39 |
| ribosomal protein L10A                                                                                                         | Rpl10a               | 18.11±0.99 |
| ribosomal protein L11                                                                                                          | Rpl11                | 34.11±1.95 |
| ribosomal protein L12 (predicted) /// similar to 60S ribosomal protein L12 /// similar to similar to 60S ribosomal protein L12 | LOC499782 /// LOC68E | 24.98±2.87 |
| ribosomal protein L13                                                                                                          | Rpl13                | 18.04±1.91 |
| ribosomal protein L13A                                                                                                         | Rpl13a               | 14.81±3.87 |
| ribosomal protein L14                                                                                                          | Rpl14                | 15.01±0.24 |
| ribosomal protein L15                                                                                                          | Rpl15                | 14.63±3.25 |



|                                                                                                                      |                      |             |
|----------------------------------------------------------------------------------------------------------------------|----------------------|-------------|
| ribosomal protein L17                                                                                                | Rpl17                | 33.48±6.7   |
| ribosomal protein L18                                                                                                | Rpl18                | 26.34±0.78  |
| ribosomal protein L18A                                                                                               | Rpl18a               | 27.23±3.45  |
| ribosomal protein L19                                                                                                | Rpl19                | 28.05±9.71  |
| ribosomal protein L21 /// similar to ribosomal protein L21                                                           | LOC679852 /// LOC69C | 15.3±0.81   |
| ribosomal protein L22                                                                                                | Rpl22                | 23.41±2.07  |
| ribosomal protein L22 like 1 (predicted)                                                                             | Rpl22l1_predicted    | 15.9±2.03   |
| ribosomal protein L23                                                                                                | Rpl23                | 27.11±2.82  |
| ribosomal protein L23a                                                                                               | Rpl23a               | 27.29±0     |
| ribosomal protein L24                                                                                                | Rpl24                | 19.14±0.17  |
| ribosomal protein L26                                                                                                | Rpl26                | 42.11±0.55  |
| ribosomal protein L27                                                                                                | Rpl27                | 28.25±0.56  |
| ribosomal protein L27a (predicted)                                                                                   | Rpl27a_predicted     | 34±1.24     |
| ribosomal protein L28                                                                                                | Rpl28                | 30.18±2.5   |
| ribosomal protein L29                                                                                                | Rpl29                | 21.69±0.22  |
| ribosomal protein L3                                                                                                 | Rpl3                 | 39.44±4.89  |
| ribosomal protein L3 /// similar to 60S ribosomal protein L3 (L4)                                                    | LOC499207 /// Rpl3   | 0.47±1.37   |
| ribosomal protein L30                                                                                                | Rpl30                | 25.61±1.19  |
| ribosomal protein L31                                                                                                | Rpl31                | 34.79±1.02  |
| ribosomal protein L32                                                                                                | Rpl32                | 40.55±0.26  |
| ribosomal protein L34 (predicted)                                                                                    | Rpl34_predicted      | 26.91±0.93  |
| ribosomal protein L35                                                                                                | Rpl35                | 20.27±1.11  |
| ribosomal protein L35a                                                                                               | Rpl35a               | 30.17±2.33  |
| ribosomal protein L36                                                                                                | LOC364105 /// RGD15f | 1.9±0.21    |
| ribosomal protein L37                                                                                                | Rpl37                | 30.7±0.31   |
| ribosomal protein L37a /// similar to 60S ribosomal protein L37a                                                     | LOC679823 /// LOC687 | 32.56±2.35  |
| ribosomal protein L39                                                                                                | Rpl39                | 0.39±0.09   |
| ribosomal protein L4                                                                                                 | Rpl4                 | 15.97±0.44  |
| ribosomal protein L41                                                                                                | Rpl41                | 29.4±1.22   |
| ribosomal protein L5                                                                                                 | Rpl5                 | 26.49±4.8   |
| ribosomal protein L6 /// similar to 60S ribosomal protein L6 (Neoplasm-related protein C140) (predicted)             | RGD1563476_predicte  | 25.37±0.87  |
| ribosomal protein L7                                                                                                 | Rpl7                 | 25.03±3.93  |
| ribosomal protein L7a (predicted)                                                                                    | Rpl7a_predicted      | 53.11±2.86  |
| ribosomal protein L7-like 1                                                                                          | Rpl7l1               | 3.01±0.26   |
| ribosomal protein L8                                                                                                 | Rpl8                 | 18.56±0.25  |
| ribosomal protein L8 /// similar to 60S ribosomal protein L8 /// similar to 60S ribosomal protein L8 (predicted)     | LOC365370 /// RGD15f | 1.97±0.67   |
| ribosomal protein L9 /// EH-domain containing 2                                                                      | Ehd2 /// Rpl9        | 38.28±3     |
| ribosomal protein S10                                                                                                | Rps10                | 19.31±0.53  |
| ribosomal protein S11                                                                                                | Rps11                | 18.85±0.9   |
| ribosomal protein S12                                                                                                | Rps12                | 43.36±0.22  |
| ribosomal protein S13 /// similar to ribosomal protein S13                                                           | LOC684988 /// Rps13  | 24.81±1.29  |
| ribosomal protein S14                                                                                                | Rps14                | 36.26±4.37  |
| ribosomal protein S15                                                                                                | Rps15                | 22.24±0.77  |
| ribosomal protein S15a                                                                                               | Rps15a               | 24.32±4.89  |
| ribosomal protein S16                                                                                                | Rps16                | 30.87±1.54  |
| ribosomal protein S17                                                                                                | Rps17                | 43.58±2.49  |
| ribosomal protein S18                                                                                                | Rps18                | 32.39±2.5   |
| ribosomal protein S19                                                                                                | Rps19                | 24.23±4.18  |
| ribosomal protein S2                                                                                                 | Rps2                 | 34.72±0.23  |
| ribosomal protein S2 /// similar to ribosomal protein S2 (predicted) /// similar to 40S ribosomal protein S2         | LOC688473 /// RGD15f | 39.24±4.52  |
| ribosomal protein S20                                                                                                | Rps20                | 23.73±0.78  |
| ribosomal protein S21                                                                                                | Rps21                | 29.71±2.34  |
| ribosomal protein S23                                                                                                | Rps23                | 41.09±4.36  |
| ribosomal protein S24                                                                                                | Rps24                | 33.64±0.34  |
| ribosomal protein s25                                                                                                | Rps25                | 8.73±1.06   |
| ribosomal protein S26                                                                                                | Rps26                | 18.5±2.18   |
| ribosomal protein S27                                                                                                | Rps27                | 34.06±0.53  |
| ribosomal protein S27a                                                                                               | Rps27a               | 22.26±1.69  |
| ribosomal protein S28 /// similar to 40S ribosomal protein S28                                                       | LOC684733 /// Rps28  | 20.62±0.15  |
| ribosomal protein S29                                                                                                | Rps29                | 56.01±1.55  |
| ribosomal protein S3                                                                                                 | Rps3                 | 21.36±3.28  |
| ribosomal protein S3a                                                                                                | Rps3a                | 39.56±0.79  |
| ribosomal protein S4, X-linked                                                                                       | Rps4x                | 52.16±14.34 |
| ribosomal protein S4, Y-linked 2                                                                                     | Rps4y2               | 0.73±0.11   |
| ribosomal protein S5                                                                                                 | Rps5                 | 20.34±0.17  |
| ribosomal protein S6                                                                                                 | Rps6                 | 21.67±0.39  |
| ribosomal protein S6 kinase polypeptide 1                                                                            | Rps6ka1              | 0.3±0.01    |
| ribosomal protein S6 kinase polypeptide 6 (predicted)                                                                | Rps6ka6_predicted    | 0.97±0.57   |
| ribosomal protein S6 kinase, 70kDa, polypeptide 1                                                                    | Rps6kb1              | 0.85±0.36   |
| ribosomal protein S6 kinase, polypeptide 1                                                                           | Rps6kc1              | 0.23±0.01   |
| ribosomal protein S6 kinase, polypeptide 4                                                                           | Rps6ka4              | 1.33±0.5    |
| ribosomal protein S6 kinase, polypeptide 5 (predicted)                                                               | Rps6ka5_predicted    | 0.21±0.04   |
| ribosomal protein S7 /// similar to ribosomal protein S7                                                             | LOC497813 /// Rps7   | 19.18±0.41  |
| ribosomal protein S8                                                                                                 | Rps8                 | 30.88±0.85  |
| ribosomal protein S9                                                                                                 | Rps9                 | 25.98±1.35  |
| ribosomal protein SA                                                                                                 | Rpsa                 | 24.18±0.73  |
| ribosomal protein SA                                                                                                 | LOC367035 /// LOC68c | 4.98±2.15   |
| ribosomal protein, large P2 /// hypothetical gene supported by X15098 /// similar to 60S acidic ribosomal protein P2 | LOC363929 /// LOC49E | 26.58±1.4   |
| ribosomal protein, large, P1                                                                                         | Rplp1                | 37.69±5.32  |
| ribosomal RNA processing 1 homolog (S. cerevisiae)                                                                   | Rrp1                 | 0.88±0.17   |
| ribosomal RNA processing 1 homolog B (S. cerevisiae)                                                                 | Rrp1b                | 0.71±0.16   |
| ribosomal RNA processing 15 homolog (S. cerevisiae)                                                                  | Rrp15                | 1.15±0.58   |
| ribosome binding protein 1                                                                                           | Rrbp1                | 0.42±0.07   |
| ribulose-5-phosphate-3-epimerase                                                                                     | Rpe                  | 1.23±0.56   |
| ring finger (C3HC4 type) and KH domain containing 1 (predicted)                                                      | Rkhd1_predicted      | 0.58±0.16   |
| ring finger 111                                                                                                      | Rnf111               | 1.12±0.2    |
| ring finger and CHY zinc finger domain containing 1                                                                  | Rchy1                | 9.87±2.46   |

|                                                                                                                         |                         |            |
|-------------------------------------------------------------------------------------------------------------------------|-------------------------|------------|
| ring finger and KH domain containing 2 (predicted)                                                                      | Rkhd2_predicted         | 3.1±0.75   |
| ring finger and WD repeat domain 3 /// similar to mixed lineage kinase domain-like                                      | LOC690743 /// Rfwd3     | 0.52±0.14  |
| ring finger protein (C3H2C3 type) 6 (predicted)                                                                         | Rnf6_predicted          | 1.18±0.05  |
| ring finger protein 1                                                                                                   | Ring1                   | 0.98±0.49  |
| ring finger protein 10                                                                                                  | Rnf10                   | 6.01±0.55  |
| ring finger protein 103                                                                                                 | Rnf103                  | 2.83±0.32  |
| ring finger protein 11 (predicted)                                                                                      | Rnf11_predicted         | 0.34±0.05  |
| ring finger protein 11 (predicted) /// similar to RING finger protein 11 (NEDD4 WW domain-binding protein 2) (Sid 1669) | LOC683844 /// Rnf11_f   | 5.78±0.21  |
| ring finger protein 113A2                                                                                               | Rnf113a2                | 0.95±0.37  |
| ring finger protein 121 (predicted)                                                                                     | Rnf121_predicted        | 0.47±0.02  |
| ring finger protein 126                                                                                                 | Rnf126                  | 0.64±0.15  |
| ring finger protein 128 /// hypothetical protein LOC680663                                                              | LOC680663 /// Rnf128    | 8.71±1.4   |
| ring finger protein 135 /// ras homolog gene family, member T1 (predicted)                                              | Rhot1_predicted /// Rnf | 3.17±0.32  |
| ring finger protein 138                                                                                                 | Rnf138                  | 1.34±0.02  |
| ring finger protein 139 (predicted)                                                                                     | Rnf139_predicted        | 3.21±1.24  |
| ring finger protein 14                                                                                                  | Rnf14                   | 7.32±0.07  |
| ring finger protein 141                                                                                                 | rnf141                  | 0.27±0.23  |
| ring finger protein 145                                                                                                 | Rnf145                  | 1.74±0.69  |
| ring finger protein 146                                                                                                 | Rnf146                  | 4.45±0.5   |
| ring finger protein 149                                                                                                 | Rnf149                  | 3.66±0.57  |
| ring finger protein 150                                                                                                 | Rnf150                  | 0.71±0.18  |
| ring finger protein 152 (predicted)                                                                                     | Rnf152_predicted        | 0.49±0.1   |
| ring finger protein 166                                                                                                 | Rnf166                  | 1.17±0.03  |
| ring finger protein 167                                                                                                 | Rnf167                  | 3.47±0.43  |
| ring finger protein 181                                                                                                 | Rnf181                  | 2.08±0.1   |
| ring finger protein 185                                                                                                 | Rnf185                  | 0.73±0.19  |
| ring finger protein 187 (predicted)                                                                                     | Rnf187_predicted        | 3.97±0.9   |
| ring finger protein 19A                                                                                                 | Rnf19a                  | 6.07±0.9   |
| ring finger protein 2                                                                                                   | Rnf2                    | 0.88±0.2   |
| ring finger protein 20 (predicted)                                                                                      | Rnf20_predicted         | 0.84±0.09  |
| ring finger protein 207                                                                                                 | Rnf207                  | 0.65±0.1   |
| ring finger protein 208                                                                                                 | Rnf208                  | 2.19±0.57  |
| ring finger protein 215                                                                                                 | Rnf215                  | 1.91±0.48  |
| ring finger protein 216                                                                                                 | Rnf216                  | 2.01±0.14  |
| ring finger protein 217                                                                                                 | Rnf217                  | 0.48±0.16  |
| ring finger protein 219                                                                                                 | Rnf219                  | 0.44±0.09  |
| ring finger protein 25                                                                                                  | Rnf25                   | 0.94±0.04  |
| ring finger protein 26 (predicted)                                                                                      | Rnf26_predicted         | 3.19±0.26  |
| ring finger protein 31 (predicted)                                                                                      | Rnf31_predicted         | 0.9±0.02   |
| ring finger protein 34                                                                                                  | Rnf34                   | 2.46±0.04  |
| ring finger protein 4                                                                                                   | Rnf4                    | 1.96±0.29  |
| ring finger protein 41                                                                                                  | Rnf41                   | 0.74±0.01  |
| Ring finger protein 44                                                                                                  | Rnf44                   | 3±0.31     |
| ring finger protein 7 (predicted)                                                                                       | Rnf7_predicted          | 4.61±0.4   |
| ring finger protein 8                                                                                                   | Rnf8                    | 0.68±0.02  |
| RING1 and YY1 binding protein (predicted)                                                                               | Rybp_predicted          | 8.79±1.04  |
| ring-box 1                                                                                                              | Rbx1                    | 5.11±1.35  |
| RIO kinase 1 (yeast)                                                                                                    | Riok1                   | 0.37±0.11  |
| RIO kinase 2 (yeast)                                                                                                    | Riok2                   | 0.36±0.16  |
| RIO kinase 3 (yeast) (predicted)                                                                                        | Riok3_predicted         | 2.91±0.19  |
| RMI1, RecQ mediated genome instability 1, homolog (S. cerevisiae)                                                       | Rmi1                    | 1.53±0.64  |
| RNA (guanine-7-) methyltransferase                                                                                      | Rnmt                    | 0.79±0.09  |
| RNA (guanine-9-) methyltransferase domain containing 1                                                                  | Rg9mtd1                 | 1.01±0.36  |
| RNA (guanine-9-) methyltransferase domain containing 3                                                                  | Rg9mtd3                 | 0.89±0.5   |
| RNA binding motif protein 10                                                                                            | Rbm10                   | 1.44±0.12  |
| RNA binding motif protein 12                                                                                            | Rbm12                   | 0.59±0     |
| RNA binding motif protein 12B                                                                                           | Rbm12b                  | 1.17±0.77  |
| RNA binding motif protein 13                                                                                            | Rbm13                   | 0.5±0.08   |
| RNA binding motif protein 15B (predicted)                                                                               | Rbm15b_predicted        | 0.24±0.07  |
| RNA binding motif protein 16                                                                                            | Rbm16                   | 2.65±0.06  |
| RNA binding motif protein 17                                                                                            | Rbm17                   | 4.07±1.12  |
| RNA binding motif protein 18 (predicted)                                                                                | Rbm18_predicted         | 2.92±0.14  |
| RNA binding motif protein 19 (predicted)                                                                                | Rbm19_predicted         | 0.4±0.06   |
| RNA binding motif protein 20 (predicted)                                                                                | Rbm20_predicted         | 0.66±0.1   |
| RNA binding motif protein 22                                                                                            | Rbm22                   | 1.14±0.01  |
| RNA binding motif protein 25 (predicted)                                                                                | Rbm25_predicted         | 1.78±0     |
| RNA binding motif protein 25 (predicted) /// similar to RNA binding motif protein 25 (predicted)                        | Rbm25_predicted /// R   | 1.92±0.53  |
| RNA binding motif protein 27 (predicted)                                                                                | Rbm27_predicted         | 0.99±0.12  |
| RNA binding motif protein 3                                                                                             | Rbm3                    | 1.47±0.3   |
| RNA binding motif protein 34                                                                                            | Rbm34                   | 0.82±0.22  |
| RNA binding motif protein 38                                                                                            | Rbm38                   | 0.33±0.06  |
| RNA binding motif protein 39                                                                                            | Rbm39                   | 10.06±1.54 |
| RNA binding motif protein 42                                                                                            | Rbm42                   | 4.11±0.76  |
| RNA binding motif protein 45                                                                                            | Rbm45                   | 3.9±0.66   |
| RNA binding motif protein 4B                                                                                            | Rbm4b                   | 3.92±0.15  |
| RNA binding motif protein 5                                                                                             | Rbm5                    | 5.8±0.75   |
| RNA binding motif protein 6                                                                                             | Rbm6                    | 0.72±0.24  |
| RNA binding motif protein 8 (predicted)                                                                                 | Rbm8_predicted          | 4.9±0.34   |
| RNA binding motif protein 9 (predicted)                                                                                 | Rbm9_predicted          | 0.33±0.07  |
| RNA binding motif protein, X chromosome                                                                                 | Rbmx                    | 1.65±0.3   |
| RNA binding motif protein, X chromosome retrogene (predicted)                                                           | Rbmxt_predicted         | 1.94±0.03  |
| RNA binding motif, single stranded interacting protein 1                                                                | Rbms1                   | 0.36±1.4   |
| RNA binding motif, single stranded interacting protein 2                                                                | Rbms2                   | 1.07±0.17  |
| RNA guanylyltransferase and 5'-phosphatase (predicted)                                                                  | Rngtt_predicted         | 0.59±0     |
| RNA polymerase 1-1                                                                                                      | Rpo1-1                  | 4.98±1.1   |
| RNA polymerase II associated protein 2                                                                                  | Rpap2                   | 0.85±0.23  |
| RNA polymerase II associated protein 3                                                                                  | Rpap3                   | 2.06±0.17  |

|                                                                                     |                           |            |
|-------------------------------------------------------------------------------------|---------------------------|------------|
| RNA pseudouridylate synthase domain containing 4                                    | Rpusd4                    | 0.65±0.17  |
| RNA terminal phosphate cyclase domain 1                                             | Rtcd1                     | 6.26±1.37  |
| RNA terminal phosphate cyclase-like 1                                               | Rcl1                      | 0.66±0.07  |
| RNA U, small nuclear RNA export adaptor                                             | Rnuxa                     | 2.45±0.36  |
| rogdi homolog (Drosophila)                                                          | Rogdi                     | 3.23±0.91  |
| rosbin, round spermatid basic protein 1 (predicted)                                 | Rsbm1_predicted           | 1.41±0.09  |
| round spermatid basic protein 1-like (predicted)                                    | Rsbm1_predicted           | 0.3±0.09   |
| Rous sarcoma oncogene                                                               | Src                       | 0.7±0.11   |
| RPE-spondin                                                                         | Rpesp                     | 9.31±1.2   |
| RRN3 RNA polymerase I transcription factor homolog (yeast)                          | Rm3                       | 0.21±0.3   |
| rRNA promoter binding protein                                                       | LOC257642                 | 9.55±4.56  |
| RRP9, small subunit (SSU) processome component, homolog (yeast)                     | Rrp9                      | 0.64±0.03  |
| RRS1 ribosome biogenesis regulator homolog (S. cerevisiae) (predicted)              | Rrs1_predicted            | 1.01±0.13  |
| RT1 class I, CE12                                                                   | RT1-CE12                  | 0.72±0.96  |
| RT1 class Ib gene, H2-TL-like, grc region (N3)                                      | Dhx16 /// Ier3 /// Mrps11 | 2.38±0.82  |
| RT1 class Ib, locus Aw2                                                             | RT1-Aw2                   | 1.16±8.53  |
| RT1 class Ib, locus Aw2                                                             | Atp6v1g2 /// B3galt4 ///  | 6.34±0.87  |
| RT1 class Ib, locus Aw2                                                             | Atp6v1g2 / B3galt4 / Cc   | 1.23±3.3   |
| RT1 class II, locus Ba                                                              | RT1-Ba                    | 5.14±2.67  |
| RT1 class II, locus Db1                                                             | RT1-Db1                   | 0.92±0.82  |
| Rtf1, Paf1/RNA polymerase II complex component, homolog (S. cerevisiae) (predicted) | Rtf1_predicted            | 0.82±0.25  |
| RUN and FYVE domain containing 1                                                    | Rufy1                     | 3.18±1.2   |
| RUN domain containing 1 (predicted)                                                 | Rundc1_predicted          | 1.42±0.15  |
| RuvB-like protein 1                                                                 | Ruvbl1                    | 0.73±0.01  |
| RuvB-like protein 2                                                                 | Ruvbl2                    | 1.31±0.36  |
| RWD domain containing 2B                                                            | Rwdd2b                    | 0.33±0.08  |
| RWD domain containing 3                                                             | Rwdd3                     | 0.2±0.02   |
| RWD domain containing 4A                                                            | Rwdd4a                    | 4.62±0.67  |
| S1 RNA binding domain 1                                                             | Srbd1                     | 1.07±0.03  |
| S100 calcium binding protein A10 (calpactin)                                        | S100a10                   | 19.12±1.75 |
| S100 calcium binding protein A11 (calizzarin)                                       | S100a11                   | 24.89±6.31 |
| S100 calcium binding protein A13 (predicted)                                        | S100a13_predicted         | 0.23±0.05  |
| S100 calcium binding protein A16 (predicted)                                        | S100a16_predicted         | 3.7±0.41   |
| SAC1 (suppressor of actin mutations 1, homolog)-like (S. cerevisiae)                | Sacm1l                    | 6.25±0.37  |
| saccharopine dehydrogenase (putative)                                               | Scppdh                    | 5.44±0.64  |
| S-adenosylhomocysteine hydrolase                                                    | Ahcy                      | 0.78±1.01  |
| S-adenosylhomocysteine hydrolase-like 1 (predicted)                                 | Ahcy1_predicted           | 13.2±1.36  |
| S-adenosylhomocysteine hydrolase-like 2                                             | Ahcy2                     | 9.42±2.04  |
| S-adenosylmethionine decarboxylase 1                                                | Amd1                      | 5.15±1.78  |
| Sal-like 1 (Drosophila) (predicted)                                                 | Sall1_predicted           | 8±3.83     |
| salvador homolog 1 (Drosophila) (predicted)                                         | Sav1_predicted            | 2.24±0.17  |
| SAP30 binding protein (predicted)                                                   | Sap30bp_predicted         | 0.4±0.04   |
| SAP30-like                                                                          | Sap30l                    | 2.41±0.38  |
| SAPS domain family, member 1 (predicted)                                            | Saps1_predicted           | 2.13±0.16  |
| SAPS domain family, member 2                                                        | Saps2                     | 0.64±0.11  |
| SAPS domain family, member 3 (predicted)                                            | Saps3_predicted           | 2.89±0.05  |
| SAR1 gene homolog A (S. cerevisiae)                                                 | Sar1a                     | 2.97±0.36  |
| SAR1 gene homolog B (S. cerevisiae)                                                 | Sar1b                     | 5.83±0.4   |
| sarcoglycan, epsilon                                                                | Sgce                      | 2.86±0.73  |
| sarcoma antigen NY-SAR-48                                                           | Ny-sar-48                 | 0.33±0.2   |
| sarcosine dehydrogenase                                                             | Sardh                     | 0.48±0.4   |
| sarcospan                                                                           | Sspn                      | 0.21±0.27  |
| scaffold attachment factor B                                                        | Safb                      | 1.06±0.15  |
| SCAN domain-containing 1 (predicted)                                                | Scand1_predicted          | 7.95±0.87  |
| scavenger receptor class F, member 1 (predicted)                                    | Scar1_predicted           | 0.31±0.02  |
| scavenger receptor cysteine rich domain containing, group B (4 domains) (predicted) | Srcrb4d_predicted         | 1.47±0.05  |
| SCF apoptosis response protein 1                                                    | LOC499941                 | 1.07±0.97  |
| schwannomin interacting protein 1                                                   | Schip1                    | 2.67±1.11  |
| Scinderin                                                                           | Scin                      | 16.18±3.85 |
| sclerostin domain containing 1                                                      | Sostdc1                   | 47.96±8.03 |
| Scm-like with four mbt domains 1                                                    | Sfmbt1                    | 0.55±0.02  |
| scotin                                                                              | MGC94600                  | 2.14±0.37  |
| scribbled homolog (Drosophila)                                                      | Scrib                     | 1.64±0.14  |
| SCY1-like 1 (S. cerevisiae)                                                         | Scyl1                     | 2.53±0.7   |
| SCY1-like 1 binding protein 1                                                       | Scyl1bp1                  | 1.46±0.71  |
| SCY1-like 2 (S. cerevisiae) (predicted)                                             | Scyl2_predicted           | 4.67±0.35  |
| SCY1-like 3 (S. cerevisiae)                                                         | Scyl3                     | 0.32±0.01  |
| sec1 family domain containing 1                                                     | Scfd1                     | 3.53±0.46  |
| SEC11 homolog A (S. cerevisiae)                                                     | Sec11a                    | 4.54±0.62  |
| SEC11 homolog C (S. cerevisiae)                                                     | Sec11c                    | 2.34±0.61  |
| SEC13 homolog (S. cerevisiae)                                                       | Sec13                     | 3.91±1.11  |
| SEC14 and spectrin domains 1                                                        | Sestd1                    | 2.87±0.23  |
| SEC14-like 1 (S. cerevisiae)                                                        | Sec14l1                   | 3.02±0.51  |
| SEC16 homolog A (S. cerevisiae)                                                     | Sec16a                    | 2.78±0.19  |
| SEC22 vesicle trafficking protein homolog A (S. cerevisiae)                         | Sec22a                    | 1.45±0.19  |
| SEC22 vesicle trafficking protein homolog B (S. cerevisiae)                         | Sec22b                    | 2.52±0.08  |
| SEC23 interacting protein                                                           | Sec23ip                   | 0.94±0.24  |
| SEC23A (S. cerevisiae) (predicted)                                                  | Sec23a_predicted          | 0.79±0.08  |
| SEC23B (S. cerevisiae) (predicted)                                                  | Sec23b_predicted          | 3.35±0.52  |
| SEC24 related gene family, member A (S. cerevisiae) (predicted)                     | Sec24a_predicted          | 1.62±0.75  |
| SEC24 related gene family, member B (S. cerevisiae) (predicted)                     | Sec24b_predicted          | 0.92±0.21  |
| SEC24 related gene family, member D (S. cerevisiae) (predicted)                     | Sec24d_predicted          | 4.9±0.28   |
| SEC31 homolog A (S. cerevisiae)                                                     | Sec31a                    | 2.38±0.0   |
| SEC3-like 1 (S. cerevisiae)                                                         | Sec3l1                    | 1.98±0.25  |
| Sec61 alpha 1 subunit (S. cerevisiae)                                               | Sec61a1                   | 4.35±0.31  |
| Sec61 beta subunit (predicted)                                                      | Sec61b_predicted          | 7.62±0.34  |
| Sec61, alpha subunit 2 (S. cerevisiae) (predicted)                                  | Sec61a2_predicted         | 1.46±0.02  |

|                                                                                                                              |                   |             |
|------------------------------------------------------------------------------------------------------------------------------|-------------------|-------------|
| SEC63-like ( <i>S. cerevisiae</i> ) (predicted)                                                                              | Sec63_predicted   | 2.07±0.29   |
| secernin 2                                                                                                                   | Scrn2             | 0.91±0.06   |
| SECIS binding protein 2                                                                                                      | Secisbp2          | 1.42±0.2    |
| secreted phosphoprotein 1                                                                                                    | Spp1              | 11.22±33.12 |
| secretin                                                                                                                     | Sct               | 0.29±0.06   |
| secretion regulating guanine nucleotide exchange factor                                                                      | Sergef            | 2.38±0.5    |
| secretogranin V                                                                                                              | Scq5              | 0.78±0.12   |
| secretory carrier membrane protein 1                                                                                         | Scamp1            | 4.02±0.3    |
| secretory carrier membrane protein 2                                                                                         | Scamp2            | 6.89±2.39   |
| secretory carrier membrane protein 3                                                                                         | Scamp3            | 4.18±0.02   |
| secretory carrier membrane protein 4                                                                                         | Scamp4            | 1.85±0.42   |
| sedlin-like                                                                                                                  | LOC287274         | 9.29±0.85   |
| sedoheptulokinase                                                                                                            | Shpk              | 0.67±0.14   |
| Sel1 (suppressor of lin-12) 1 homolog ( <i>C. elegans</i> )                                                                  | Sel1h             | 2.56±0.14   |
| SEL1 domain containing protein RGD735029                                                                                     | RGD735029         | 2.2±0.86    |
| sel-1 suppressor of lin-12-like ( <i>C. elegans</i> )                                                                        | Sel1l             | 0.49±0.18   |
| selenium binding protein 1                                                                                                   | Selenbp1          | 9.34±0.13   |
| selenocysteine lyase                                                                                                         | Scly              | 3.22±0.01   |
| selenophosphate synthetase 1                                                                                                 | Seps1             | 2.48±0.38   |
| selenophosphate synthetase 2                                                                                                 | Seps2             | 3.16±0.87   |
| selenoprotein                                                                                                                | Sept15            | 10.86±1.04  |
| selenoprotein K                                                                                                              | Selk              | 8.39±0.83   |
| selenoprotein P, plasma, 1                                                                                                   | Sepp1             | 32.13±1.22  |
| selenoprotein S                                                                                                              | SELS              | 5.56±0.12   |
| selenoprotein T                                                                                                              | Selt              | 1.95±0.43   |
| sema domain, immunoglobulin domain (Ig), short basic domain, secreted, (semaphorin) 3B (predicted)                           | Sema3b_predicted  | 3.19±0.24   |
| sema domain, immunoglobulin domain (Ig), transmembrane domain (TM) and short cytoplasmic domain, (semaphorin) 4A             | Sema4a            | 5.08±1.39   |
| sema domain, immunoglobulin domain (Ig), transmembrane domain (TM) and short cytoplasmic domain, (semaphorin) 4B             | Sema4b            | 3.56±0.01   |
| sema domain, immunoglobulin domain (Ig), transmembrane domain (TM) and short cytoplasmic domain, (semaphorin) 4F             | Sema4f            | 0.79±0.08   |
| sema domain, immunoglobulin domain (Ig), transmembrane domain (TM) and short cytoplasmic domain, (semaphorin) 4G (predicted) | Sema4g_predicted  | 1.26±0.12   |
| sema domain, transmembrane domain (TM), and cytoplasmic domain, (semaphorin) 6D (predicted)                                  | Sema6d_predicted  | 5.27±1.12   |
| sepiapterin reductase                                                                                                        | Spr               | 0.7±0.23    |
| septin 1                                                                                                                     | Sept1             | 0.64±0.08   |
| septin 11                                                                                                                    | Sept11            | 1.45±0.06   |
| septin 14                                                                                                                    | Sept14            | 0.24±0.1    |
| septin 2                                                                                                                     | Sept2             | 5.96±0.64   |
| septin 4                                                                                                                     | Sept4             | 15.06±2.62  |
| septin 7                                                                                                                     | sept7             | 5.67±0.36   |
| septin 8 (predicted)                                                                                                         | Sept8_predicted   | 0.61±0.39   |
| septin 9                                                                                                                     | Sept9             | 1.99±0.25   |
| sequestosome 1                                                                                                               | Sqstm1            | 11.06±4.31  |
| serine (or cysteine) peptidase inhibitor, clade B, member 6a                                                                 | Serpinb6a         | 4.1±0.24    |
| serine (or cysteine) peptidase inhibitor, clade H, member 1                                                                  | Serpinh1          | 6.21±1.46   |
| serine (or cysteine) proteinase inhibitor, clade B, member 1a                                                                | Serpinb1a         | 1.52±0.3    |
| serine carboxypeptidase 1                                                                                                    | Scpep1            | 1.01±1.84   |
| serine hydroxymethyltransferase 1 (soluble)                                                                                  | Shmt1             | 3.94±0.23   |
| serine hydroxymethyltransferase 2 (mitochondrial)                                                                            | Shmt2             | 0.86±0.16   |
| serine incorporator 1                                                                                                        | Serinc1           | 7±1.18      |
| serine incorporator 3                                                                                                        | Serinc3           | 7.55±2.75   |
| serine palmitoyltransferase, long chain base subunit 1 (predicted)                                                           | Spltc1_predicted  | 7±1.83      |
| serine peptidase inhibitor, Kazal type 8                                                                                     | Spink8            | 0.23±0.11   |
| serine protease inhibitor, Kunitz type 1                                                                                     | Spint1            | 2.92±0.46   |
| serine protease inhibitor, Kunitz type 2                                                                                     | Spint2            | 30.33±0.51  |
| serine racemase                                                                                                              | Srr               | 1.32±0.07   |
| serine/arginine repetitive matrix 1 (predicted)                                                                              | Srrm1_predicted   | 2.66±0.45   |
| serine/arginine repetitive matrix 2 (predicted)                                                                              | Srrm2_predicted   | 7.01±4.03   |
| Serine/arginine-rich protein specific kinase 1                                                                               | Srp1              | 0.98±0.23   |
| serine/arginine-rich protein specific kinase 2 (predicted)                                                                   | Srp2_predicted    | 2.39±0.22   |
| serine/threonine kinase 11 interacting protein (predicted)                                                                   | Stk11ip_predicted | 0.79±0.04   |
| serine/threonine kinase 16                                                                                                   | Stk16             | 3.75±0      |
| serine/threonine kinase 17b (apoptosis-inducing)                                                                             | Stk17b            | 0.42±0.17   |
| Serine/threonine kinase 2                                                                                                    | Slk               | 1.83±0.82   |
| serine/threonine kinase 22 substrate 1 /// interferon regulatory factor 3                                                    | Irf3 /// Stk22s1  | 1.59±0.94   |
| serine/threonine kinase 24 (STE20 homolog, yeast)                                                                            | Stk24             | 2.34±0.45   |
| serine/threonine kinase 25 (STE20 homolog, yeast)                                                                            | Stk25             | 2.22±0.34   |
| serine/threonine kinase 3 (STE20 homolog, yeast)                                                                             | Stk3              | 1.81±0.12   |
| serine/threonine kinase 38                                                                                                   | Stk38             | 1.71±0.29   |
| serine/threonine kinase 39, STE20/SPS1 homolog (yeast)                                                                       | Stk39             | 2.39±0.33   |
| serine/threonine kinase 4 (predicted)                                                                                        | Stk4_predicted    | 1.6±0.2     |
| serine/threonine kinase receptor associated protein                                                                          | Strap             | 8.51±0.14   |
| serine/threonine/tyrosine interacting-like 1                                                                                 | Styx1             | 0.3±0.01    |
| serologically defined colon cancer antigen 1                                                                                 | Sdccag1           | 2.28±0.43   |
| serologically defined colon cancer antigen 10                                                                                | Sdccag10          | 0.32±0.03   |
| serologically defined colon cancer antigen 3                                                                                 | Sdccag3           | 3.35±0.2    |
| Serpine1 mRNA binding protein 1                                                                                              | Serbp1            | 14.86±1.07  |
| SERTA domain containing 1                                                                                                    | Sertad1           | 1.38±0.4    |
| SERTA domain containing 2                                                                                                    | Sertad2           | 2.08±0.45   |
| SERTA domain containing 4                                                                                                    | Sertad4           | 0.51±0.2    |
| serum deprivation response                                                                                                   | Sdpr              | 0.81±0.23   |
| serum response factor (predicted)                                                                                            | Srf_predicted     | 1.23±0.4    |
| serum response factor binding protein 1                                                                                      | Srfbp1            | 0.81±0.33   |
| seryl-aminoacyl-tRNA synthetase                                                                                              | Sars              | 5.23±2.43   |
| seryl-aminoacyl-tRNA synthetase 2                                                                                            | Sars2             | 0.36±0.09   |
| sestrin 1 (predicted)                                                                                                        | Sesn1_predicted   | 2.43±0.1    |
| SET and MYND domain containing 1 (predicted)                                                                                 | Smyd1_predicted   | 0.29±0.16   |
| SET and MYND domain containing 2                                                                                             | Smyd2             | 0.82±0.25   |
| SET and MYND domain containing 3                                                                                             | Smyd3             | 0.33±0.18   |

|                                                                                                                                     |                     |            |
|-------------------------------------------------------------------------------------------------------------------------------------|---------------------|------------|
| SET and MYND domain containing 4 (predicted)                                                                                        | Smyd4_predicted     | 1.76±0.08  |
| SET and MYND domain containing 5 (predicted)                                                                                        | Smyd5_predicted     | 0.64±0.11  |
| SET binding factor 1 (predicted)                                                                                                    | Sbf1_predicted      | 0.77±0.04  |
| SET domain and mariner transposase fusion gene                                                                                      | Setmar              | 0.53±0.05  |
| SET domain containing (lysine methyltransferase) 8 /// similar to SET domain-containing protein                                     | LOC687538 /// LOC68 | 1.36±0.09  |
| SET domain containing 2                                                                                                             | Setd2               | 1.46±0.39  |
| SET domain containing 3                                                                                                             | Setd3               | 4.34±1.09  |
| SET domain containing 4                                                                                                             | Setd4               | 0.89±0.03  |
| SET domain containing 5                                                                                                             | Setd5               | 0.48±0.12  |
| SET domain containing 6                                                                                                             | Setd6               | 0.47±0.11  |
| SET domain, bifurcated 1 (predicted)                                                                                                | Setdb1_predicted    | 1.7±0.2    |
| SET translocation (predicted)                                                                                                       | Set_predicted       | 4.75±0.71  |
| SET translocation (predicted)                                                                                                       | LOC502130 /// RGD15 | 6.29±0.92  |
| seven in absentia 1A                                                                                                                | Siah1a              | 0.53±0.03  |
| seven in absentia 2                                                                                                                 | Siah2               | 0.4±0.11   |
| sex comb on midleg homolog 1 (predicted)                                                                                            | Scmh1_predicted     | 1.43±0.14  |
| SFT2 domain containing 1                                                                                                            | Sft2d1              | 4.17±0.44  |
| SFT2 domain containing 2                                                                                                            | Sft2d2              | 9.92±1.9   |
| SGT1, suppressor of G2 allele of SKP1 (S. cerevisiae)                                                                               | Suqt1               | 3.4±1.6    |
| SH2 domain containing 4A                                                                                                            | Sh2d4a              | 3.14±0.12  |
| SH2 domain containing phosphatase anchor protein 1 (predicted)                                                                      | Spap1_predicted     | 0.9±0.01   |
| SH2-B PH domain containing signaling mediator 1                                                                                     | Sh2bpsm1            | 2.22±0.51  |
| SH3 and PX domain containing 3 (predicted)                                                                                          | Sh3px3_predicted    | 1.16±0.13  |
| SH3 domain and tetratricopeptide repeats 1 (predicted)                                                                              | Sh3tc1_predicted    | 0.7±1.41   |
| SH3 domain YSC-like 1 (predicted)                                                                                                   | Sh3yl1_predicted    | 1.83±0.69  |
| SH3/ankyrin domain gene 2                                                                                                           | Shank2              | 9.13±0.49  |
| SH3-binding domain glutamic acid-rich protein                                                                                       | Sh3bgr              | 1.28±0.28  |
| SH3-binding domain glutamic acid-rich protein like (predicted)                                                                      | Sh3bgr1_predicted   | 2.26±0.81  |
| SH3-binding kinase 1                                                                                                                | Sbk1                | 0.61±0.06  |
| SH3-domain binding protein 4                                                                                                        | Sh3bp4              | 3.12±0.83  |
| SH3-domain binding protein 5 (BTK-associated)                                                                                       | Sh3bp5              | 3.44±2.57  |
| SH3-domain GRB2-like 1                                                                                                              | Sh3ql1              | 0.99±0.04  |
| SH3-domain GRB2-like 2                                                                                                              | Sh3gl2              | 1.32±0.38  |
| SH3-domain GRB2-like B1 (endophilin)                                                                                                | Sh3glb1             | 1.42±0.26  |
| SH3-domain GRB2-like endophilin B2                                                                                                  | Sh3glb2             | 1.15±0.23  |
| Sh3kbp1 binding protein 1 (predicted)                                                                                               | Shkbp1_predicted    | 0.92±0.25  |
| SHANK-associated RH domain interacting protein                                                                                      | Sharpin             | 3.37±0.29  |
| short coiled-coil protein                                                                                                           | Scoc                | 6.94±0.72  |
| shroom family member 2                                                                                                              | Shroom2             | 1.32±0.82  |
| Shwachman-Bodian-Diamond syndrome homolog (human)                                                                                   | Sbds                | 4.26±0.19  |
| siah binding protein 1; FBP interacting repressor; pyrimidine tract binding splicing factor; Ro ribonucleoprotein-binding protein 1 | Siahbp1             | 4.72±0.49  |
| sialic acid acetyltransferase (predicted)                                                                                           | Siae_predicted      | 2.57±0.06  |
| SID1 transmembrane family, member 2 (predicted)                                                                                     | Sidt2_predicted     | 2.91±0.41  |
| sideroflexin 3                                                                                                                      | Sfxn3               | 5.53±0.01  |
| sideroflexin 4 (predicted)                                                                                                          | Sfxn4_predicted     | 0.98±0.05  |
| signal peptidase complex subunit 2 homolog (S. cerevisiae) (predicted)                                                              | Spcs2_predicted     | 4.04±0.5   |
| signal peptide peptidase 3                                                                                                          | Spp13               | 4.32±0.0   |
| signal peptide peptidase-like 2A                                                                                                    | Spp12a              | 1.52±0.62  |
| signal peptide peptidase-like 2B                                                                                                    | Spp12b              | 1.49±0.51  |
| signal recognition particle 14 (predicted)                                                                                          | Srp14_predicted     | 8.96±0.67  |
| signal recognition particle 19 (predicted)                                                                                          | Srp19_predicted     | 2.25±0.29  |
| signal recognition particle 54                                                                                                      | Srp54               | 1.8±0.6    |
| signal recognition particle 68 (predicted)                                                                                          | Srp68_predicted     | 3.2±0.04   |
| signal recognition particle 72                                                                                                      | Srp72               | 2.29±0.29  |
| signal recognition particle receptor ('docking protein')                                                                            | Srpr                | 6.68±0.62  |
| signal recognition particle receptor, B subunit                                                                                     | Srprb               | 5.72±1.1   |
| signal sequence receptor, alpha                                                                                                     | Ssr1                | 10.11±2.31 |
| signal sequence receptor, beta (predicted)                                                                                          | Ssr2_predicted      | 3.02±0.17  |
| signal sequence receptor, delta                                                                                                     | Ssr4                | 12.33±3.73 |
| signal sequence receptor, gamma                                                                                                     | Ssr3                | 8.22±1.05  |
| signal transducer and activator of transcription 1                                                                                  | Stat1               | 7.38±0.61  |
| signal transducer and activator of transcription 2                                                                                  | Stat2               | 1.56±0.14  |
| signal transducer and activator of transcription 3                                                                                  | Stat3               | 5.47±1.57  |
| signal transducer and activator of transcription 6 (predicted)                                                                      | Stat6_predicted     | 0.25±0.07  |
| signal transducing adaptor family member 2                                                                                          | Stap2               | 0.25±0.4   |
| signal-induced proliferation-associated 1 like 1                                                                                    | Sipa11              | 0.81±0.05  |
| similar to 0610007L01Rik protein                                                                                                    | MGC94190            | 8.5±1.29   |
| similar to 0610010K06Rik protein                                                                                                    | RGD1307161          | 5.92±0.06  |
| Similar to 106 kDa O-GlcNAc transferase-interacting protein (predicted)                                                             | RGD1307844_predicte | 0.72±0.53  |
| similar to 1110008L16Rik protein (predicted)                                                                                        | RGD1305089_predicte | 2.12±0.18  |
| similar to 1500019C06Rik protein (predicted)                                                                                        | RGD1560433_predicte | 0.41±0.24  |
| similar to 1700019E19Rik protein (predicted)                                                                                        | RGD1307392_predicte | 1.04±0.9   |
| similar to 1700113K14Rik protein (predicted)                                                                                        | RGD1311084_predicte | 0.56±0.19  |
| similar to 1700123Q020Rik protein (predicted)                                                                                       | RGD1308430_predicte | 2.05±0.12  |
| similar to 2010004A03Rik protein (predicted) /// similar to 2010004A03Rik protein                                                   | LOC498951 /// RGD13 | 0.59±0.08  |
| similar to 2010321M09Rik protein                                                                                                    | RGD1359616          | 2.38±0.31  |
| similar to 2210021J22Rik protein (predicted)                                                                                        | RGD1306001_predicte | 0.41±0.07  |
| similar to 2310044H10Rik protein                                                                                                    | MGC93975            | 2.54±0.39  |
| similar to 2310047B19Rik protein (predicted)                                                                                        | RGD1308026_predicte | 0.82±0.12  |
| similar to 2410001C21Rik protein                                                                                                    | RGD1311072          | 3.12±0.63  |
| similar to 2410024A21Rik protein                                                                                                    | RGD1304878          | 1.02±0.23  |
| similar to 2610027C15Rik protein (predicted)                                                                                        | RGD1308876_predicte | 0.28±0.07  |
| similar to 2610030H06Rik protein (predicted)                                                                                        | RGD1566155_predicte | 0.66±0.21  |
| similar to 2610301G19Rik protein (predicted)                                                                                        | RGD1309922_predicte | 1.31±0.03  |
| similar to 2610317D23Rik protein (predicted)                                                                                        | RGD1565411_predicte | 0.92±0.27  |
| similar to 2700029M09Rik protein (predicted)                                                                                        | RGD1311747_predicte | 3.42±1.29  |
| similar to 2700078E11Rik protein                                                                                                    | RGD1308127          | 2.82±0.67  |

|                                                                                                                                      |                        |             |
|--------------------------------------------------------------------------------------------------------------------------------------|------------------------|-------------|
| Similar to 2810022L02Rik protein                                                                                                     | RGD1309930             | 0.33±0.34   |
| similar to 2810422O20Rik protein                                                                                                     | RGD1306783             | 0.65±0.12   |
| similar to 2900002H16Rik protein (predicted)                                                                                         | RGD1307973_predicted   | 2.99±0.26   |
| similar to 3000004C01Rik protein                                                                                                     | RGD1310360             | 0.22±0.01   |
| similar to 3110080A02Rik protein (predicted)                                                                                         | RGD1305754_predicted   | 0.39±0.13   |
| similar to 3-oxoacid CoA transferase 1                                                                                               | LOC678860              | 47.52±1.66  |
| similar to 4632419K20Rik protein                                                                                                     | MGC94288               | 0.47±0.02   |
| similar to 4921517L17Rik protein                                                                                                     | RGD1311678             | 0.33±0.12   |
| similar to 4930429A08Rik protein (predicted)                                                                                         | RGD1564943_predicted   | 2.2±0.39    |
| similar to 4930438D12Rik protein (predicted)                                                                                         | RGD1563224_predicted   | 4.04±0.43   |
| similar to 4930453N24Rik protein                                                                                                     | MGC95208               | 1.48±0.33   |
| Similar to 4930506M07Rik protein (predicted)                                                                                         | RGD1311558_predicted   | 1±0.47      |
| Similar to 4930566A11Rik protein (predicted)                                                                                         | RGD1306674_predicted   | 0.45±0.04   |
| similar to 5(3)-deoxyribonucleotidase, cytosolic type (Cytosolic 5,3-pyrimidine nucleotidase) (Deoxy-5-nucleotidase 1) (dNT-1)       | LOC688261              | 0.73±0.21   |
| similar to 5730403M16Rik protein                                                                                                     | LOC308320              | 0.42±0.03   |
| Similar to 5730420B22Rik protein (predicted)                                                                                         | RGD1306755_predicted   | 0.46±0.44   |
| similar to 5930416I19Rik protein                                                                                                     | MGC94282               | 0.48±0.08   |
| similar to 5-nucleotidase, cytosolic II                                                                                              | LOC365090              | 4.39±0.53   |
| similar to 6.8 kDa mitochondrial proteolipid                                                                                         | LOC691427              | 18.68±0.95  |
| similar to 60S ribosomal protein L38 /// ribosomal protein L38 /// 60S ribosomal protein L38 pseudogene                              | LOC681221 /// LOC68135 | 66±1.57     |
| similar to 82-kD FMRP Interacting Protein                                                                                            | LOC687994              | 0.38±0.28   |
| similar to 9130011E15Rik protein (predicted)                                                                                         | RGD1564887_predicted   | 0.91±0.19   |
| similar to 9230105E10Rik protein                                                                                                     | RGD1304579             | 1.73±0.22   |
| similar to 9630058J23Rik protein (predicted)                                                                                         | RGD1564833_predicted   | 1.49±0      |
| similar to 9930012K11Rik protein (predicted)                                                                                         | RGD1308117_predicted   | 0.49±0.38   |
| Similar to a disintegrin and metalloprotease domain 4                                                                                | LOC500688              | 1.57±0.31   |
| Similar to a disintegrin-like and metalloprotease (reprolysin type) with thrombospondin type 1 motif, 10                             | LOC314655              | 0.71±0.17   |
| similar to Acyl-CoA dehydrogenase family member 8, mitochondrial precursor (ACAD-8) (predicted)                                      | RGD1564209_predicted   | 1.31±0.24   |
| similar to acyl-CoA thioesterase                                                                                                     | LOC302640              | 8±0.57      |
| similar to Adaptor-related protein complex 1, mu 2 subunit (AP1M2) (predicted)                                                       | RGD1561490_predicted   | 4.34±0.8    |
| similar to Adenosine deaminase CG11994-PA                                                                                            | LOC311352              | 0.4±0.2     |
| similar to Adenylosuccinate synthetase isozyme 1 (Adenylosuccinate synthetase, muscle isozyme) (IMP--aspartate ligase 1) (AdSS 1) (A | LOC684425              | 0.47±0.06   |
| similar to adipocyte-specific protein 4                                                                                              | RGD1308813             | 3.95±1.07   |
| similar to ADP-ribosylation factor GTPase-activating protein 3 (ARF GAP 3)                                                           | LOC503165              | 1.48±0.15   |
| similar to ADP-ribosylation factor-like 1                                                                                            | LOC688311              | 1.39±0.1    |
| similar to AHA1, activator of heat shock 90kDa protein ATPase homolog 1                                                              | LOC681996              | 2.59±0.06   |
| similar to AI115348 protein (predicted)                                                                                              | RGD1311939_predicted   | 1.85±0.16   |
| Similar to AL023001 protein (predicted)                                                                                              | RGD1305001_predicted   | 1.55±0.45   |
| similar to alcohol dehydrogenase PAN2 (predicted)                                                                                    | RGD1565196_predicted   | 2.95±2.25   |
| similar to Alpha- and gamma-adaptin-binding protein p34                                                                              | LOC498912              | 2.19±0.49   |
| Similar to alternative testis transcripts open reading frame A CG4241-PA, isoform A                                                  | LOC689414              | 0.88±0.22   |
| similar to AMME syndrome candidate gene 1 protein homolog (predicted)                                                                | RGD1561004_predicted   | 0.23±0.11   |
| similar to AMSH-family protein                                                                                                       | LOC687696              | 1.4±0.05    |
| similar to Amyloid beta (A4) precursor-like protein 1 (predicted)                                                                    | RGD1561211_predicted   | 0.36±0.07   |
| similar to anaphase promoting complex subunit 13                                                                                     | LOC685029              | 5.51±1.77   |
| similar to ankyrin repeat domain 40                                                                                                  | LOC688144              | 3.25±0.28   |
| similar to AP2 associated kinase 1 (predicted)                                                                                       | RGD1563580_predicted   | 1.83±0.71   |
| similar to AP-3 complex subunit sigma-2 (Adapter-related protein complex 3 sigma-2 subunit) (Sigma-adaptin 3b) (AP-3 complex sigma-2 | LOC683402              | 2.08±0.52   |
| Similar to APG4 autophagy 4 homolog C                                                                                                | LOC313391              | 0.78±0.11   |
| similar to APG4-D protein                                                                                                            | LOC686505              | 1.58±0.76   |
| Similar to Apolipoprotein L3 (Apolipoprotein L-III) (ApoL-III) (TNF-inducible protein CG12-1) (CG12_1) (predicted)                   | RGD1309798_predicted   | 0.21±0      |
| similar to apoptosis related protein APR-3; p18 protein (predicted)                                                                  | RGD1311605_predicted   | 2.99±0.66   |
| similar to apurinic/apyrimidinic endonuclease 2 (predicted)                                                                          | RGD1565983_predicted   | 0.34±0.09   |
| similar to arginyl aminopeptidase (aminopeptidase B)-like 1                                                                          | LOC684035              | 3.33±0.13   |
| similar to arsenate resistance protein 2                                                                                             | LOC686980              | 2.24±0.03   |
| similar to ATP synthase, H+ transporting, mitochondrial F0 complex, subunit f, isoform 2                                             | LOC684567              | 46.93±7.26  |
| similar to autophagy 5-like                                                                                                          | LOC365601              | 1.85±0.03   |
| Similar to axonemal dynein light chain 1                                                                                             | LOC685664              | 0.34±0.17   |
| similar to B0432.8                                                                                                                   | LOC289378              | 1.39±0.12   |
| similar to B0511.12                                                                                                                  | LOC690217              | 0.54±0.02   |
| similar to B230212L03Rik protein                                                                                                     | MGC95152               | 2.3±0.48    |
| similar to Basic FGF-repressed Zic-binding protein (mbFzB)                                                                           | LOC683512              | 3.03±0.81   |
| similar to Basic helix-loop-helix transcription factor scleraxis                                                                     | LOC684826              | 0.51±0      |
| similar to BC003940 protein (predicted)                                                                                              | RGD1311925_predicted   | 3.59±0.71   |
| Similar to BC021442 protein (predicted)                                                                                              | RGD1561413_predicted   | 0.38±0.46   |
| Similar to B-cell CLL/lymphoma 7A                                                                                                    | LOC690085              | 2.53±0.34   |
| Similar to Bcl2-associated athanogene 2                                                                                              | LOC690038              | 1.52±0.21   |
| Similar to bK1191B2.3.1 (PUTATIVE novel Acyl Transferase similar to C. elegans C50D2.7) (variant 1) (predicted)                      | RGD1306698_predicted   | 1.36±0.52   |
| similar to Brain protein 44 (predicted)                                                                                              | RGD1563422_predicted   | 26.72±1.92  |
| Similar to Breast carcinoma amplified sequence 3 homolog (K20D4) (predicted)                                                         | RGD1560788_predicted   | 0.75±0.17   |
| similar to Butyrate-induced transcript 1 (predicted)                                                                                 | RGD1565496_predicted   | 2.19±0.08   |
| similar to C1orf17 protein (predicted)                                                                                               | RGD1306959_predicted   | 0.79±0.04   |
| similar to C184L-22 /// Sjogren's syndrome/scleroderma autoantigen 1                                                                 | LOC684594 /// Ssca1    | 1.56±0.55   |
| similar to C1orf25                                                                                                                   | RGD1307890             | 1.3±0.07    |
| similar to C21orf70 protein                                                                                                          | RGD1311257             | 0.87±0.21   |
| similar to C530044N13Rik protein                                                                                                     | RGD1306568             | 3.87±1.12   |
| similar to capping protein (actin filament) muscle Z-line, alpha 1                                                                   | LOC691149              | 3.26±0.27   |
| Similar to Catechol O-methyltransferase (predicted)                                                                                  | RGD1561509_predicted   | 0.55±0.12   |
| Similar to CCAAT displacement protein isoform b                                                                                      | Cutl1                  | 3.65±0.37   |
| similar to cDNA sequence AF155546                                                                                                    | RGD1309387             | 1.01±0.19   |
| similar to cDNA sequence AK129302 (predicted)                                                                                        | RGD1561708_predicted   | 0.76±0.04   |
| similar to cDNA sequence BC005537                                                                                                    | LOC498750              | 5.97±1      |
| Similar to cDNA sequence BC006662                                                                                                    | RGD1304748             | 29.02±17.22 |
| similar to cDNA sequence BC013529 (predicted)                                                                                        | RGD1309759_predicted   | 4.28±0.79   |
| similar to cDNA sequence BC017158                                                                                                    | RGD1310127             | 2.29±0.2    |
| similar to cDNA sequence BC017647 (predicted)                                                                                        | RGD1566149_predicted   | 0.87±0.31   |
| similar to cDNA sequence BC020002 (predicted)                                                                                        | RGD1308432_predicted   | 0.59±0.15   |

|                                                                                                            |                      |            |
|------------------------------------------------------------------------------------------------------------|----------------------|------------|
| similar to CDNA sequence BC024479                                                                          | LOC500974            | 2.38±0.78  |
| similar to cDNA sequence BC024814 (predicted)                                                              | RGD1311433_predicte  | 1±0.09     |
| similar to cDNA sequence BC025816                                                                          | LOC498957            | 0.56±0.06  |
| similar to cDNA sequence BC031181 (predicted)                                                              | RGD1562987_predicte  | 5.49±0.36  |
| similar to cDNA sequence BC056474 (predicted)                                                              | RGD1564058_predicte  | 3.5±1.33   |
| similar to CDV-3B                                                                                          | LOC315970            | 0.72±0.1   |
| similar to Cell division protein kinase 8 (Protein kinase K35) (predicted)                                 | RGD1560888_predicte  | 1.17±0.11  |
| similar to centrosome protein Cep63                                                                        | LOC300963            | 0.49±0.21  |
| similar to cervical cancer receptor (predicted)                                                            | RGD1310591_predicte  | 2.02±0.01  |
| similar to CG10084-PA                                                                                      | RGD1308297           | 4.67±0.28  |
| similar to CG11206-PA                                                                                      | LOC313672            | 0.58±0.28  |
| similar to CG11388-PA (predicted)                                                                          | RGD1308154_predicte  | 2.23±0.62  |
| similar to CG12279-PA                                                                                      | LOC500420            | 1.15±0.84  |
| similar to CG12379-PA (predicted)                                                                          | RGD1308635_predicte  | 3.97±0.8   |
| similar to CG12929-PA                                                                                      | LOC682404            | 1.04±0.05  |
| similar to CG12935-PA                                                                                      | LOC686289 /// LOC69C | 3.82±0.55  |
| similar to CG13901-PA                                                                                      | RGD1307648           | 1.75±0.01  |
| Similar to CG13957-PA (predicted)                                                                          | RGD1309995_predicte  | 0.56±0.64  |
| similar to CG14286-PA                                                                                      | LOC686765            | 1.95±0.32  |
| similar to CG14483-PA                                                                                      | LOC681884            | 2.9±0.11   |
| similar to CG14803-PA (predicted)                                                                          | RGD1304693_predicte  | 0.46±0.15  |
| similar to CG14903-PA (predicted)                                                                          | RGD1561792_predicte  | 1.74±0.05  |
| similar to CG14967-PA                                                                                      | RGD1307929           | 6.81±0.12  |
| similar to CG14977-PA (predicted)                                                                          | RGD1309735_predicte  | 6.19±1.12  |
| similar to CG14980-PB                                                                                      | RGD1306410           | 2.64±0.74  |
| similar to CG16812-PA (predicted)                                                                          | RGD1307554_predicte  | 0.43±0.12  |
| similar to CG18661-PA                                                                                      | RGD1307155           | 2.86±0.77  |
| similar to CG1998-PA                                                                                       | LOC691221            | 3.17±0.62  |
| similar to CG31122-PA (predicted)                                                                          | RGD1306941_predicte  | 1.9±0.71   |
| similar to CG31613-PA                                                                                      | LOC684841            | 0.31±0.04  |
| Similar to CG31759-PA                                                                                      | RGD1310975           | 0.33±0.04  |
| similar to CG33331-PA                                                                                      | LOC362419            | 1.18±0.55  |
| similar to CG33714-PB, isoform B                                                                           | LOC688717            | 2.76±0.93  |
| similar to CG3570-PA                                                                                       | LOC500034            | 1.42±0.28  |
| Similar to CG3740-PA                                                                                       | LOC690000            | 3.18±0.66  |
| similar to CG4751-PA                                                                                       | LOC681944            | 9.39±1.97  |
| similar to CG4768-PA (predicted)                                                                           | RGD1309748_predicte  | 2.56±0.85  |
| similar to CG5500-PA                                                                                       | LOC688310            | 1.6±0.36   |
| similar to CG5987-PA (predicted) /// mesenchymal stem cell protein DSC92                                   | Ngrn /// RGD1310399  | 1.89±0.16  |
| similar to CG6105-PA                                                                                       | MGC72942             | 37.87±8.63 |
| similar to CG6878-PA                                                                                       | LOC679572            | 8.01±2.66  |
| similar to CG8043-PA (predicted)                                                                           | RGD1306000_predicte  | 0.7±0.35   |
| similar to CG8272-PA                                                                                       | LOC502201            | 0.23±0.07  |
| similar to CG8841-PA (predicted)                                                                           | RGD1311422_predicte  | 0.69±0.19  |
| similar to CG9117-PA                                                                                       | RGD1306932           | 0.41±0.14  |
| similar to CG9240-PA                                                                                       | LOC687395            | 2.64±1.02  |
| Similar to CG9339-PA (predicted)                                                                           | RGD1306143_predicte  | 0.32±0.06  |
| similar to CG9346-PA (predicted)                                                                           | RGD1307882_predicte  | 1.88±0.48  |
| similar to CG9752-PA                                                                                       | RGD1311345           | 3.09±0.04  |
| similar to CG9882-PA (predicted)                                                                           | RGD1306157_predicte  | 1.2±0.17   |
| similar to CG9886-like                                                                                     | LOC684314            | 0.21±0.01  |
| similar to CG9967-PA, isoform A                                                                            | LOC678910            | 1.21±0.16  |
| Similar to CG9996-PA                                                                                       | LOC300173            | 1.47±0.46  |
| similar to CGI-112 protein                                                                                 | RGD1308113           | 0.71±0.05  |
| similar to CGI-35 protein (predicted)                                                                      | RGD1310899_predicte  | 6.71±0.17  |
| similar to Chain A, Solution Structure Of The Bola-Like Protein From Mus Musculus (predicted)              | RGD1309998_predicte  | 5.86±0.94  |
| similar to channel-interacting PDZ domain protein isoform 1 (predicted)                                    | RGD1565362_predicte  | 2.55±0.13  |
| similar to chr2 synaptotagmin (predicted)                                                                  | RGD1565705_predicte  | 0.47±0.07  |
| similar to chromosome 1 open reading frame 172                                                             | RGD1303271           | 0.56±0.06  |
| similar to chromosome 1 open reading frame 2 (predicted)                                                   | RGD1306107_predicte  | 0.83±0.4   |
| similar to chromosome 1 open reading frame 50 (predicted)                                                  | RGD1564804_predicte  | 0.58±0.24  |
| similar to chromosome 1 open reading frame 63                                                              | RGD1359529           | 9.49±0.66  |
| similar to chromosome 10 open reading frame 18 (predicted)                                                 | RGD1564456_predicte  | 1.44±0.24  |
| similar to chromosome 10 open reading frame 4; similar to putative acid phosphatase F26C11.1               | RGD1309482           | 0.87±0.12  |
| similar to chromosome 10 open reading frame 6 (predicted)                                                  | RGD1560300_predicte  | 1.16±0.07  |
| similar to chromosome 14 open reading frame 130                                                            | RGD1359144           | 1.57±0.14  |
| similar to chromosome 14 open reading frame 138 (predicted)                                                | RGD1306228_predicte  | 2.33±0.33  |
| similar to chromosome 14 open reading frame 145                                                            | LOC500700            | 0.55±0.05  |
| similar to chromosome 14 open reading frame 21 (predicted)                                                 | RGD1308396_predicte  | 0.46±0.4   |
| similar to chromosome 14 open reading frame 35 (predicted)                                                 | RGD1559923_predicte  | 2.73±0.02  |
| similar to chromosome 14 open reading frame 50                                                             | RGD1309051           | 4.16±0.56  |
| similar to chromosome 14 open reading frame 94                                                             | RGD1305288           | 4.04±0.33  |
| similar to chromosome 16 open reading frame 28 (predicted)                                                 | RGD1565247_predicte  | 0.67±0.42  |
| similar to chromosome 16 open reading frame 33; minus -99 protein (predicted)                              | RGD1310922_predicte  | 1.63±0.28  |
| similar to chromosome 16 open reading frame 5                                                              | RGD1310686           | 5.5±0.23   |
| similar to chromosome 16 open reading frame 7 (predicted)                                                  | RGD1565149_predicte  | 1.73±0.21  |
| similar to chromosome 17 open reading frame 27                                                             | LOC688296            | 0.2±0.18   |
| similar to chromosome 2 open reading frame 3; transcription factor 9 (binds GC-rich sequences) (predicted) | RGD1304792_predicte  | 0.24±0.03  |
| similar to chromosome 20 open reading frame 116 (predicted)                                                | RGD1309979_predicte  | 3.85±0.34  |
| similar to chromosome 20 open reading frame 30; HSPC274 protein                                            | RGD1307399           | 3.5±0.27   |
| Similar to chromosome 20 open reading frame 6                                                              | RGD1306067           | 2.07±0.53  |
| similar to chromosome 3 open reading frame 10                                                              | LOC679934            | 2.87±0.24  |
| similar to chromosome 6 open reading frame 106 isoform a                                                   | LOC294154            | 6.63±1.28  |
| similar to chromosome 7 open reading frame 11                                                              | LOC678905            | 0.63±0.08  |
| Similar to chromosome 7 open reading frame 23 (predicted)                                                  | RGD1562351_predicte  | 0.51±0.08  |
| similar to chromosome 7 open reading frame 30 (predicted)                                                  | RGD1306936_predicte  | 3.44±0.14  |
| Similar to chromosome 9 open reading frame 5 (predicted)                                                   | RGD1308958_predicte  | 0.28±0.13  |

|                                                                                                                                                 |                               |            |
|-------------------------------------------------------------------------------------------------------------------------------------------------|-------------------------------|------------|
| similar to cleavage stimulation factor, 3 pre-RNA subunit 2                                                                                     | LOC683927                     | 0.22±0.15  |
| similar to Coatomer gamma-2 subunit (Gamma-2 coat protein) (Gamma-2 COP) (predicted)                                                            | RGD1566215_predicted          | 4.64±0.52  |
| similar to coiled coil domain containing 28B                                                                                                    | LOC682445                     | 0.23±0.07  |
| Similar to coiled-coil domain containing 6                                                                                                      | LOC691155                     | 0.55±1.13  |
| similar to coiled-coil domain containing 8                                                                                                      | MGC72567                      | 0.52±0.16  |
| similar to coiled-coil domain containing 9                                                                                                      | LOC684934                     | 0.61±0.15  |
| similar to coiled-coil-helix-coiled-coil-helix domain containing 7                                                                              | LOC684258                     | 3.78±0.6   |
| similar to component of oligomeric golgi complex 2                                                                                              | LOC678914                     | 1.75±0.39  |
| similar to component of oligomeric golgi complex 2 /// component of oligomeric golgi complex 2                                                  | Cog2 /// LOC678914            | 0.21±0.07  |
| similar to component of oligomeric golgi complex 5 isoform 1 (predicted)                                                                        | RGD1563296_predicted          | 0.96±0.16  |
| similar to constitutive photomorphogenic protein 1                                                                                              | RGD1304773                    | 5.76±0.3   |
| similar to copine II                                                                                                                            | LOC498972                     | 1.09±0.28  |
| similar to COX10 homolog, cytochrome c oxidase assembly protein, heme A: farnesyltransferase                                                    | LOC687381 /// LOC6912.77±0.71 |            |
| similar to COX11 homolog, cytochrome c oxidase assembly protein /// COX11 homolog, cytochrome c oxidase assembly protein (yeast)                | Cox11 /// LOC688135           | 0.75±0.22  |
| similar to CPSF4 protein                                                                                                                        | MGC108785                     | 1.69±0.18  |
| similar to cullin 4A (predicted)                                                                                                                | RGD1563853_predicted          | 0.75±0.19  |
| similar to cullin 7                                                                                                                             | LOC680835                     | 1.11±0.02  |
| similar to cyclin-dependent kinase inhibitor 2D                                                                                                 | Cdkn2d                        | 0.97±0.22  |
| similar to Cysteine protease ATG4A (Autophagy-related protein 4 homolog A) (Autophagin-2) (Autophagy-related cysteine endopeptidase)            | LOC678769                     | 1.72±0.01  |
| similar to cystin 1                                                                                                                             | LOC690489                     | 2.63±1.6   |
| similar to cytokine receptor related protein 4                                                                                                  | Cytor4                        | 0.68±0.24  |
| similar to D1Ert622e protein (predicted)                                                                                                        | RGD1562136_predicted          | 7.53±1.59  |
| similar to D330021B20 protein                                                                                                                   | RGD1308143                    | 1.39±0.99  |
| similar to D3Mm3e (predicted)                                                                                                                   | RGD1561494_predicted          | 0.32±0.05  |
| similar to D8Ert6354e protein (predicted)                                                                                                       | RGD1560755_predicted          | 2.69±0.49  |
| similar to dachshund                                                                                                                            | LOC686314                     | 0.72±0.29  |
| similar to Dachshund homolog 1 (Dach1)                                                                                                          | LOC306096                     | 0.57±0.19  |
| similar to DEAD (Asp-Glu-Ala-Asp) box polypeptide 48                                                                                            | rCG_33565                     | 6.95±0.24  |
| similar to death effector domain-containing DNA binding protein 2                                                                               | LOC687118                     | 0.44±0.02  |
| similar to Dedicator of cytokinesis protein 1 (180 kDa protein downstream of CRK) (DOCK180)                                                     | LOC679295                     | 6.21±0.72  |
| similar to defective SPERMATOGENESIS family member (spe-39)                                                                                     | LOC681989                     | 3.94±0.3   |
| similar to Dehydrogenase/reductase SDR family member 7 precursor (Retinal short-chain dehydrogenase/reductase 4) (predicted)                    | RGD1565002_predicted          | 0.77±0.31  |
| similar to Dendritic cell protein GA17 (predicted)                                                                                              | RGD1565840_predicted          | 11.37±0.56 |
| similar to density-regulated protein                                                                                                            | LOC689601                     | 1.56±0.17  |
| similar to DEP domain containing 6 (predicted)                                                                                                  | RGD1561030_predicted          | 2.65±0.11  |
| similar to Der1-like domain family, member 2                                                                                                    | LOC687738                     | 1.99±0.19  |
| similar to diacylglycerol kinase epsilon                                                                                                        | LOC497978                     | 0.51±0.1   |
| similar to diacylglycerol kinase, delta 130kDa isoform 1 (predicted)                                                                            | RGD1563309_predicted          | 0.49±0.1   |
| similar to differentially expressed in B16F10 1                                                                                                 | LOC687029                     | 5.35±0.71  |
| Similar to dimerization cofactor of hepatocyte nuclear factor 1 (HNF1) from muscle                                                              | LOC685729                     | 11.06±4.19 |
| similar to DIP13 alpha (predicted)                                                                                                              | RGD1309388_predicted          | 1.61±0.42  |
| similar to Disco-interacting protein 2 homolog /// DIP2 disco-interacting protein 2 homolog A (Drosophila)                                      | Dip2a /// LOC687682           | 1.99±0.24  |
| similar to divalent cation tolerant protein CUTA (predicted)                                                                                    | RGD1564854_predicted          | 1.06±0.32  |
| similar to dJ202D23.2 (novel protein similar to C21ORF5 (KIAA0933)) (predicted)                                                                 | RGD1305534_predicted          | 0.7±0.09   |
| Similar to dJ55C23.6 gene product (predicted)                                                                                                   | RGD1306962_predicted          | 2.76±0.7   |
| similar to dJ842G6.1.1 (novel protein) (predicted)                                                                                              | RGD1309829_predicted          | 2.21±0.6   |
| similar to dJ881L22.2 (novel protein) (predicted)                                                                                               | RGD1307696_predicted          | 1.04±0.06  |
| Similar to DKFZP434B168 protein (predicted)                                                                                                     | RGD1308014_predicted          | 1.02±0.54  |
| similar to DKFZP547E1010 protein                                                                                                                | LOC361990                     | 4.11±1.06  |
| similar to DKFZP547E1010 protein /// similar to Protein C1orf77 homolog                                                                         | LOC361990 /// LOC50C          | 1.05±0.18  |
| Similar to DNA (cytosine-5)-methyltransferase 3A (Dnmt3a) (DNA methyltransferase MmullIA) (DNA MTase MmullIA) (M.MmullIA) (pred                 | RGD1305891_predicted          | 0.44±0.03  |
| similar to DNA segment on chromosome X and Y (unique) 155 expressed sequence isoform 1                                                          | LOC288526                     | 1.24±0.01  |
| similar to DNA segment, Chr 1, Brigham & Womens Genetics 0212 expressed (predicted)                                                             | RGD1560909_predicted          | 0.68±0.15  |
| Similar to DNA segment, Chr 10, University of California at Los Angeles 1 (predicted)                                                           | RGD1560401_predicted          | 4.04±0.1   |
| similar to DNA segment, Chr 10, Wayne State University 102, expressed (predicted)                                                               | RGD1563365_predicted          | 0.45±0     |
| similar to DNA segment, Chr 11, Wayne State University 99, expressed (predicted) /// hypothetical protein LOC619573                             | LOC619573 /// RGD131          | 1.08±0.43  |
| similar to DNA segment, Chr 14, ERATO Doi 436, expressed (predicted)                                                                            | RGD1304610_predicted          | 0.41±0.22  |
| similar to DNA segment, Chr 14, ERATO Doi 449, expressed                                                                                        | RGD1305689                    | 0.96±0.11  |
| similar to DNA segment, Chr 18, Wayne State University 98, expressed (predicted)                                                                | RGD1560212_predicted          | 3.21±0.03  |
| similar to DNA segment, Chr 19, ERATO Doi 386, expressed (predicted)                                                                            | RGD1307934_predicted          | 0.24±0.02  |
| similar to DNA segment, Chr 4, ERATO Doi 22, expressed (predicted)                                                                              | RGD1560286_predicted          | 1.61±0.17  |
| similar to DNA segment, Chr 5, ERATO Doi 135, expressed                                                                                         | LOC679383                     | 1.18±0.03  |
| similar to DNA segment, Chr 6, Wayne State University 163, expressed (predicted)                                                                | RGD1311164_predicted          | 1.15±0.31  |
| similar to DnaJ (Hsp40) homolog, subfamily A, member 4                                                                                          | LOC498996                     | 2.1±1.01   |
| similar to DnaJ (Hsp40) homolog, subfamily B, member 10 isoform 2                                                                               | LOC689593                     | 5.74±0.6   |
| similar to DnaJ homolog subfamily B member 6 (Heat shock protein J2) (HSJ-2) (MRJ) (mDj4)                                                       | LOC690183                     | 6.75±0.52  |
| similar to DnaJ homolog subfamily B member 6 (Heat shock protein J2) (predicted)                                                                | Dnajb6 /// LOC686213          | 2.13±0.12  |
| Similar to DNA-repair protein XRCC2 (X-ray repair cross-complementing protein 2) (predicted)                                                    | RGD1564823_predicted          | 0.2±0.07   |
| similar to DOC-1 related protein /// CDK2-associated protein 2                                                                                  | Cdk2ap2 /// LOC68378          | 8.72±1.54  |
| similar to dolichyl-phosphate mannosyltransferase polypeptide 3 (Dolichol-phosphate mannosase synthase subunit 3) (predicted)                   | rCG_63436 /// RGD156          | 4.85±0.04  |
| similar to downregulated in renal cell carcinoma                                                                                                | RGD1306327                    | 4.65±0.12  |
| similar to e(y)2 protein                                                                                                                        | LOC682575                     | 4.7±1.79   |
| similar to early estrogen-induced gene 1 protein                                                                                                | LOC687750                     | 1.37±0.12  |
| Similar to EHM2 (predicted)                                                                                                                     | RGD1562988_predicted          | 1.41±0.38  |
| similar to Elongation factor Ts, mitochondrial precursor (EF-Ts) (EF-TsMt) (2A3-2)                                                              | LOC679068                     | 2.43±0.85  |
| similar to Elongation of very long chain fatty acids protein 1                                                                                  | LOC679532                     | 5.21±0.16  |
| similar to elongation protein 4 homolog                                                                                                         | LOC687694                     | 0.75±0.38  |
| similar to EMSY protein (predicted)                                                                                                             | RGD1310712_predicted          | 0.43±0.12  |
| similar to enoyl Coenzyme A hydratase domain containing 3                                                                                       | LOC684538                     | 4.94±2.25  |
| similar to ENSANGP00000021391 (predicted)                                                                                                       | RGD1309779_predicted          | 7.54±0.87  |
| similar to Ephrin type-B receptor 4 precursor (Tyrosine-protein kinase receptor MDK-2) (Developmental kinase 2) (Tyrosine kinase MYK-           | LOC686310                     | 1.79±0.43  |
| similar to Erbb2 interacting protein isoform 2 (predicted)                                                                                      | RGD1562952_predicted          | 3.28±0.39  |
| similar to erythroid differentiation-related factor 1 (predicted)                                                                               | RGD1306820_predicted          | 0.72±0.06  |
| similar to ES cell-expressed Ras                                                                                                                | LOC679682                     | 1.78±0.48  |
| similar to Eukaryotic translation initiation factor 3 subunit 2 (eIF-3 beta) (eIF3 p36) (eIF3i) (TGF-beta receptor-interacting protein 1) (TRIP | LOC682390                     | 5.44±0.51  |
| similar to Exocyst complex component Sec15B (predicted)                                                                                         | RGD1560638_predicted          | 0.91±0.01  |
| similar to exosome component 1                                                                                                                  | LOC679140                     | 0.83±0.11  |



|                                                                                                                                          |                      |            |
|------------------------------------------------------------------------------------------------------------------------------------------|----------------------|------------|
| similar to exosome component 10                                                                                                          | LOC313707            | 0.49±0.13  |
| Similar to expressed sequence AA536743 (predicted)                                                                                       | RGD1307468_predicted | 2.76±1.64  |
| similar to expressed sequence AA960436                                                                                                   | RGD1305215           | 0.53±0.3   |
| Similar to expressed sequence A1449175                                                                                                   | MGC72612             | 0.27±0.23  |
| similar to expressed sequence A1597479                                                                                                   | RGD1310553           | 1.16±0.1   |
| similar to expressed sequence AW209491                                                                                                   | RGD1308147           | 1.76±1.14  |
| similar to expressed sequence AW212394 (predicted)                                                                                       | RGD1562317_predicted | 2.66±0.39  |
| similar to expressed sequence AW413431 (predicted)                                                                                       | RGD1559841_predicted | 0.87±0.04  |
| similar to expressed sequence AW556797 (predicted)                                                                                       | RGD1305138_predicted | 1.36±0.43  |
| Similar to Ext1                                                                                                                          | LOC299907            | 0.35±0.02  |
| similar to F28C1.3a                                                                                                                      | LOC308398            | 1.23±0.23  |
| similar to F33H2.2                                                                                                                       | LOC689997            | 5.52±1.9   |
| similar to F33H2.2                                                                                                                       | LOC684063 /// LOC68  | 1.33±0.18  |
| similar to F54C1.5a                                                                                                                      | LOC499814            | 0.46±0.53  |
| similar to F57G4.9                                                                                                                       | LOC690164            | 0.28±0.03  |
| similar to Fam13a1 protein                                                                                                               | RGD1309807           | 1.25±0.13  |
| similar to family 53, member C protein                                                                                                   | LOC685405            | 1.17±0.12  |
| similar to family with sequence similarity 11, member A (predicted)                                                                      | RGD1563037_predicted | 2.78±0.52  |
| similar to F-box only protein 27 (predicted)                                                                                             | RGD1563982_predicted | 0.56±0.03  |
| similar to F-box only protein 31 (predicted)                                                                                             | RGD1561069_predicted | 0.98±0.04  |
| similar to F-box only protein 6 (F-box/G-domain protein 2) (predicted)                                                                   | RGD1305932_predicted | 0.33±0.15  |
| similar to F-box protein FBL2                                                                                                            | RGD1308119           | 0.79±0.36  |
| similar to Fbxw17 protein (predicted)                                                                                                    | RGD1566133_predicted | 0.41±0.05  |
| similar to Fc fragment of IgG binding protein; IgG Fc binding protein                                                                    | RGD1311906           | 0.42±0.1   |
| similar to FKS24 (predicted)                                                                                                             | RGD1308064_predicted | 3.41±0.8   |
| similar to FLJ0128 protein (predicted)                                                                                                   | RGD1308093_predicted | 0.66±0.11  |
| Similar to FLJ20298 protein isoform a (predicted)                                                                                        | RGD1563084_predicted | 1.47±0.1   |
| similar to Folypolyglutamate synthase, mitochondrial precursor (Folypoly-gamma-glutamate synthetase) (FPGS) (Tetrahydrofolate synth      | LOC687266            | 4±0.93     |
| similar to FUN14 domain containing 2 (predicted)                                                                                         | RGD1560916_predicted | 2.5±0.13   |
| Similar to G protein-coupled receptor 146 (predicted)                                                                                    | RGD1560731_predicted | 0.74±0.03  |
| similar to Galactosylceramide sulfotransferase (GalCer sulfotransferase) (Cerebroside sulfotransferase) (3-phosphoadenylylsulfate:galac  | LOC683713            | 7.48±3.15  |
| similar to gamma-aminobutyric acid (GABA(A)) receptor-associated protein-like 1                                                          | MGC125167            | 5.92±0.06  |
| similar to GC-rich sequence DNA-binding factor homolog                                                                                   | LOC681004            | 1.16±0.41  |
| similar to gem (nuclear organelle) associated protein 5                                                                                  | LOC686616            | 0.67±0.23  |
| similar to gem (nuclear organelle) associated protein 7                                                                                  | LOC499391            | 1.67±0.04  |
| similar to gene trap ROSA b-geo 22                                                                                                       | LOC687166 /// LOC69  | 10.78±0.11 |
| similar to GI:13385412-like protein splice form I                                                                                        | RGD735065            | 4.54±0.59  |
| similar to GLI-Kruppel family member GLI4                                                                                                | LOC500893            | 0.86±0.09  |
| similar to Glucocorticoid receptor DNA-binding factor 1                                                                                  | LOC686359            | 3.58±1.05  |
| similar to Glucosylceramidase precursor (Beta-glucocerebrosidase) (Acid beta-glucosidase) (D-glucosyl-N-acylsphingosine glucohydrola     | LOC684536            | 1.22±0.25  |
| similar to glutathione transferase GSTM7-7                                                                                               | MGC108896            | 0.35±0.05  |
| similar to glycogen synthase 1, muscle                                                                                                   | LOC687978 /// LOC69  | 3.19±0.26  |
| similar to Golgi phosphoprotein 2 (Golgi membrane protein GP73)                                                                          | LOC680692 /// LOC68  | 7.66±0.19  |
| similar to GTL2, imprinted maternally expressed untranslated (predicted)                                                                 | RGD1566401_predicted | 0.31±0.16  |
| similar to H43E16.1                                                                                                                      | LOC689994            | 0.39±0.1   |
| similar to HCD1 protein (predicted)                                                                                                      | RGD1309307_predicted | 1.16±0.3   |
| similar to Hepatocellular carcinoma-associated antigen 58 homolog (predicted)                                                            | RGD1305020_predicted | 0.41±0.16  |
| Similar to heterogeneous nuclear ribonucleoprotein G - human                                                                             | LOC302855            | 2.71±0.24  |
| similar to Histidine triad nucleotide-binding protein 1 (Adenosine 5-monophosphoramidase) (Protein kinase C inhibitor 1) (Protein kinase | LOC690660            | 23.94±3.18 |
| Similar to histocompatibility 28                                                                                                         | LOC310968            | 1.6±0.93   |
| similar to histone cell cycle regulation defective homolog A isoform 1                                                                   | LOC363849            | 0.42±0.38  |
| similar to Histone H1.2 (H1 VAR.1) (H1c)                                                                                                 | LOC684681            | 25.18±11.6 |
| similar to HIV-1 Rev binding protein                                                                                                     | LOC363266            | 1.27±0.2   |
| similar to HLA-B associated transcript-2 isoform a                                                                                       | LOC296637            | 4.44±1.38  |
| similar to homeobox protein (predicted)                                                                                                  | RGD1566402_predicted | 1.63±0.55  |
| similar to Homeobox protein Hox-D9 (Hox-4.4) (Hox-5.2)                                                                                   | LOC682957            | 3.71±0.09  |
| similar to homeobox-containing transcription factor (predicted)                                                                          | RGD1561431_predicted | 2±0.52     |
| similar to homeotic protein Hox 4.6 - mouse (predicted)                                                                                  | RGD1563800_predicted | 1.38±0.01  |
| similar to HSPC043 protein (predicted)                                                                                                   | RGD1307983_predicted | 1.47±0.05  |
| similar to HSPC288 (predicted)                                                                                                           | RGD1310769_predicted | 1.16±0.05  |
| similar to HT014 (predicted)                                                                                                             | RGD1308048_predicted | 3.4±0.5    |
| similar to HT021 (predicted)                                                                                                             | RGD1306063_predicted | 2.96±0.27  |
| similar to HTGN29 protein; keratinocytes associated transmembrane protein 2                                                              | RGD1310352           | 5.47±0.04  |
| similar to hypothetical gene supported by AF226663 (predicted)                                                                           | RGD1565146_predicted | 0.72±0.14  |
| similar to hypothetical gene supported by AK085276 (predicted)                                                                           | RGD1562252_predicted | 0.93±0.09  |
| similar to hypothetical gene supported by BC025338 (predicted)                                                                           | RGD1564419_predicted | 1.11±0.31  |
| similar to hypothetical GGC48595 (predicted)                                                                                             | RGD1566220_predicted | 0.69±0.32  |
| similar to hypothetical p38 protein (predicted)                                                                                          | RGD1311910_predicted | 1.78±0.24  |
| similar to hypothetical protein                                                                                                          | RGD1306595           | 1.64±0.52  |
| similar to hypothetical protein                                                                                                          | RGD1310571           | 1.53±0.29  |
| similar to hypothetical protein                                                                                                          | RGD1307336           | 1.58±0.17  |
| similar to hypothetical protein                                                                                                          | RGD1311361           | 0.55±0.1   |
| similar to hypothetical protein                                                                                                          | RGD1310571           | 0.43±0.12  |
| similar to hypothetical protein                                                                                                          | LOC360479            | 0.34±0.01  |
| similar to hypothetical protein (predicted)                                                                                              | RGD1305045_predicted | 6.42±0.85  |
| similar to hypothetical protein (predicted)                                                                                              | RGD1308489_predicted | 2.03±0.22  |
| similar to hypothetical protein (predicted)                                                                                              | RGD1561605_predicted | 2.35±0.48  |
| similar to hypothetical protein (predicted)                                                                                              | RGD1309765_predicted | 1.59±0.76  |
| similar to hypothetical protein (predicted)                                                                                              | RGD1565432_predicted | 1.79±0.5   |
| similar to hypothetical protein (predicted)                                                                                              | RGD1308489_predicted | 1.97±0.11  |
| similar to hypothetical protein (predicted)                                                                                              | RGD1310440_predicted | 1.53±0.04  |
| similar to hypothetical protein (predicted)                                                                                              | RGD1306576_predicted | 1.57±0.09  |
| similar to hypothetical protein (predicted)                                                                                              | RGD1560620_predicted | 0.93±0.06  |
| similar to hypothetical protein (predicted)                                                                                              | RGD1305269_predicted | 0.43±0.16  |
| similar to hypothetical protein (predicted)                                                                                              | RGD1560620_predicted | 0.3±0.02   |
| similar to hypothetical protein (predicted)                                                                                              | RGD1562590_predicted | 0.4±0.23   |
| similar to hypothetical protein BC011833 (predicted)                                                                                     | RGD1309188_predicted | 5.35±1.51  |

|                                                                                                                                     |                     |            |
|-------------------------------------------------------------------------------------------------------------------------------------|---------------------|------------|
| similar to Hypothetical protein BC014729                                                                                            | MGC105560           | 3.66±0.49  |
| similar to hypothetical protein BC015148 (predicted)                                                                                | RGD1309095_preditce | 0.26±0.14  |
| similar to Hypothetical protein C6orf60 (predicted) /// similar to minichromosome maintenance protein 8 isoform 1 (predicted)       | RGD1311294_preditce | 0.38±0.01  |
| similar to hypothetical protein CG003 (predicted)                                                                                   | RGD1307034_preditce | 0.5±0.03   |
| similar to Hypothetical protein CGI-99                                                                                              | RGD1304704          | 12.43±1.72 |
| similar to hypothetical protein CL25084 (predicted)                                                                                 | RGD1306508_preditce | 11.02±1.04 |
| similar to hypothetical protein D030056L22                                                                                          | LOC499331           | 0.95±0.62  |
| Similar to hypothetical protein D15Ert4785e                                                                                         | MGC114417           | 0.75±0.01  |
| similar to hypothetical protein D2Ert4391e (predicted)                                                                              | RGD1310685_preditce | 3.37±0.79  |
| similar to hypothetical protein DKFZp313N0621 (predicted)                                                                           | RGD1560717_preditce | 2.45±0.35  |
| similar to hypothetical protein DKFZp434A1319 (predicted)                                                                           | RGD1307357_preditce | 0.24±0.27  |
| similar to hypothetical protein DKFZp434K1815                                                                                       | LOC304396           | 0.41±0.03  |
| similar to hypothetical protein DKFZp564D0478 (predicted)                                                                           | RGD1304793_preditce | 2.02±0.06  |
| similar to hypothetical protein DKFZp761D0211 (predicted)                                                                           | RGD1306151_preditce | 5.2±0.45   |
| similar to hypothetical protein ET (predicted)                                                                                      | RGD1307394_preditce | 0.86±0.15  |
| Similar to hypothetical protein F730001J03 (predicted)                                                                              | RGD1311757_preditce | 1.05±0.32  |
| similar to hypothetical protein FLJ10154                                                                                            | RGD1310061          | 5.3±0.14   |
| similar to hypothetical protein FLJ10342 (predicted)                                                                                | RGD1307791_preditce | 0.72±0.28  |
| similar to hypothetical protein FLJ10901 (predicted)                                                                                | RGD1311892_preditce | 0.34±0.35  |
| similar to hypothetical protein FLJ10925                                                                                            | RGD1305455          | 0.28±0.06  |
| similar to hypothetical protein FLJ10986                                                                                            | LOC298250           | 2.16±0.22  |
| similar to hypothetical protein FLJ11193 (predicted)                                                                                | RGD1306502_preditce | 1.36±0.45  |
| similar to hypothetical protein FLJ11218                                                                                            | RGD1309804          | 0.43±0.53  |
| Similar to hypothetical protein FLJ11305 (predicted)                                                                                | RGD1307041_preditce | 1.22±0.18  |
| similar to hypothetical protein FLJ12118 (predicted)                                                                                | RGD1311612_preditce | 0.36±0.17  |
| similar to hypothetical protein FLJ12242 (predicted)                                                                                | RGD1311154_preditce | 0.48±0.02  |
| similar to hypothetical protein FLJ12661 (predicted)                                                                                | RGD1309403_preditce | 0.29±0.14  |
| Similar to hypothetical protein FLJ12787                                                                                            | RGD1310992          | 0.22±0.04  |
| similar to hypothetical protein FLJ13045 (predicted)                                                                                | RGD1307615_preditce | 1.17±0     |
| similar to hypothetical protein FLJ13089                                                                                            | RGD1305685          | 0.3±0.13   |
| similar to hypothetical protein FLJ13149 (predicted)                                                                                | RGD1563839_preditce | 1.72±0.41  |
| similar to hypothetical protein FLJ13188 (predicted)                                                                                | RGD1305500_preditce | 0.38±0.21  |
| similar to hypothetical protein FLJ13231 (predicted) /// hypothetical protein LOC679830                                             | LOC679830 /// RGD13 | 0.3±0.07   |
| similar to hypothetical protein FLJ14146                                                                                            | RGD1310587          | 2.17±1.35  |
| similar to hypothetical protein FLJ14675                                                                                            | RGD1309592          | 0.73±1.15  |
| similar to hypothetical protein FLJ20010 (predicted)                                                                                | RGD1563941_preditce | 3.66±0.17  |
| similar to hypothetical protein FLJ20014                                                                                            | LOC497934           | 0.49±0.04  |
| Similar to hypothetical protein FLJ20154                                                                                            | RGD1305793          | 3.86±1.51  |
| similar to hypothetical protein FLJ20171 (predicted)                                                                                | RGD1560481_preditce | 2.07±0.14  |
| similar to hypothetical protein FLJ20254                                                                                            | RGD1311324          | 2.32±0.73  |
| similar to hypothetical protein FLJ20259 (predicted)                                                                                | RGD1311095_preditce | 0.36±0.39  |
| similar to hypothetical protein FLJ20276 (predicted)                                                                                | RGD1308101          | 0.2±0.02   |
| similar to hypothetical protein FLJ20436                                                                                            | RGD1303127          | 3.57±0.52  |
| similar to hypothetical protein FLJ20436 /// hypothetical LOC363737                                                                 | LOC363737 /// RGD13 | 0.43±0.09  |
| similar to hypothetical protein FLJ20487                                                                                            | RGD1309216          | 5.14±1.71  |
| similar to hypothetical protein FLJ20507 (predicted)                                                                                | RGD1309744_preditce | 3.05±0.15  |
| Similar to hypothetical protein FLJ20627 (predicted)                                                                                | RGD1309546_preditce | 2.33±0.41  |
| Similar to hypothetical protein FLJ20674 (predicted)                                                                                | RGD1565800_preditce | 1.18±0.37  |
| similar to hypothetical protein FLJ20729 (predicted)                                                                                | RGD1308723_preditce | 0.53±0.05  |
| similar to hypothetical protein FLJ21156 (predicted)                                                                                | RGD1309823_preditce | 0.94±0.05  |
| similar to hypothetical protein FLJ21820                                                                                            | RGD1311648          | 1.52±0.46  |
| similar to hypothetical protein FLJ21827                                                                                            | RGD1307682          | 1.85±0.48  |
| similar to hypothetical protein FLJ22175 (predicted)                                                                                | RGD1306926_preditce | 0.73±0.34  |
| similar to hypothetical protein FLJ22490 (predicted)                                                                                | RGD1307055_preditce | 0.81±0.16  |
| Similar to hypothetical protein FLJ22578 (predicted)                                                                                | RGD1566232_preditce | 0.36±0.06  |
| similar to hypothetical protein FLJ22965 (predicted)                                                                                | RGD1564541_preditce | 0.95±0.36  |
| similar to hypothetical protein FLJ23263                                                                                            | RGD1310414          | 0.31±0.12  |
| Similar to hypothetical protein FLJ23451 (predicted)                                                                                | RGD1310453_preditce | 0.83±0.02  |
| similar to hypothetical protein FLJ30596 (predicted)                                                                                | RGD1306809_preditce | 2.37±0.14  |
| similar to hypothetical protein FLJ31528                                                                                            | RGD1307410          | 0.7±0.05   |
| similar to hypothetical protein FLJ31606 (predicted)                                                                                | RGD1561507_preditce | 1.15±0.4   |
| similar to hypothetical protein FLJ32796 (predicted)                                                                                | RGD1311142_preditce | 0.33±0.05  |
| similar to hypothetical protein FLJ32825 (predicted)                                                                                | RGD1564257_preditce | 0.2±0.11   |
| Similar to hypothetical protein FLJ32884 (predicted)                                                                                | RGD1309453_preditce | 1.97±0.13  |
| similar to hypothetical protein FLJ33868 (predicted)                                                                                | RGD1305797_preditce | 0.94±0.06  |
| Similar to hypothetical protein FLJ33977 (predicted)                                                                                | RGD1306423_preditce | 0.94±0.43  |
| similar to hypothetical protein FLJ37953 (predicted)                                                                                | RGD1311269_preditce | 0.52±0.13  |
| similar to Hypothetical protein KIAA0152                                                                                            | RGD1307736          | 0.63±0.15  |
| similar to Hypothetical protein KIAA0373 (predicted)                                                                                | RGD1311640_preditce | 0.22±0.08  |
| similar to hypothetical protein LOC284018 isoform b (predicted)                                                                     | RGD1565033_preditce | 1.5±0.17   |
| similar to hypothetical protein LOC340061 (predicted)                                                                               | RGD1562552_preditce | 0.27±0.24  |
| similar to Hypothetical protein MGC11690                                                                                            | RGD1305178          | 2.78±0.34  |
| similar to hypothetical protein MGC14327 (predicted)                                                                                | RGD1306304_preditce | 1.92±0.1   |
| Similar to hypothetical protein MGC17337 (predicted)                                                                                | RGD1308165_preditce | 0.22±0.16  |
| Similar to hypothetical protein MGC17839 (predicted)                                                                                | RGD1565079_preditce | 0.85±0.04  |
| similar to hypothetical protein MGC17943 (predicted)                                                                                | RGD1563325_preditce | 2.03±0.34  |
| similar to Hypothetical protein MGC18716                                                                                            | RGD1307935          | 5.16±0.03  |
| Similar to hypothetical protein MGC20700 (predicted)                                                                                | RGD1307722_preditce | 0.22±0.12  |
| similar to hypothetical protein MGC23280 (predicted)                                                                                | RGD1305508_preditce | 1.84±0.06  |
| similar to hypothetical protein MGC2494                                                                                             | RGD1306126          | 2.86±0.06  |
| similar to hypothetical protein MGC25461 (predicted)                                                                                | RGD1306717_preditce | 0.24±0.01  |
| similar to Hypothetical protein MGC25529 (predicted)                                                                                | RGD1306746_preditce | 1.6±0.24   |
| Similar to hypothetical protein MGC29390 (predicted)                                                                                | RGD1310490_preditce | 0.45±0.15  |
| similar to hypothetical protein MGC29875; novel putative protein similar to YIL091C yeast hypothetical 84 kD protein from SGA1-KTR7 | LOC305076           | 0.64±0.01  |
| similar to hypothetical protein MGC30618                                                                                            | RGD1305572          | 1.3±0.24   |
| similar to hypothetical protein MGC3207                                                                                             | RGD1307789          | 1.59±0.68  |
| Similar to hypothetical protein MGC36325 (predicted)                                                                                | RGD1307374_preditce | 0.8±0.34   |

similar to hypothetical protein MGC36831 (predicted) RGD1306215\_preditce 2.57±0.4

similar to hypothetical protein MGC37079 (predicted) RGD1310484\_preditce 1.8±0.24

similar to hypothetical protein MGC38960 (predicted) RGD1310552\_preditce 1.25±0.18

similar to hypothetical protein MGC40841; similar to hypothetical protein MGC4707 RGD1309540 0.97±0.26

similar to hypothetical protein MGC45873 (predicted) RGD1310271\_preditce 0.31±0.2

similar to hypothetical protein MGC52110 (predicted) RGD1565095\_preditce 26.18±0.91

similar to hypothetical protein MGC6696 RGD1309471 4.86±0.41

similar to hypothetical protein MGC7537 RGD1359380 3.48±0.16

similar to hypothetical protein MGC9912 (predicted) RGD1309138\_preditce 0.95±0.35

similar to hypothetical protein PRO0971 RGD1311435 1.7±0.04

similar to hypothetical protein supported by AL449243 (predicted) /// similar to CG17680-PA LOC687237 /// RGD13 13.14±0.8

similar to Hypothetical UPF0184 protein C9orf16 homolog (predicted) RGD1561113\_preditce 3.31±0.37

similar to Hypothetical UPF0327 protein (predicted) RGD1560187\_preditce 25.87±4.44

similar to Interferon-alpha LOC686326 0.39±0.36

similar to interferon-inducible GTPase MGC108823 0.23±0.17

Similar to interleukin 17D precursor LOC691799 0.31±0.31

similar to ionized calcium binding adapter molecule 2 (Iba2) (predicted) RGD1305081\_preditce 1.03±0.11

similar to IQ motif and Sec7 domain 1 LOC686590 5.68±0.65

similar to IQ motif and Sec7 domain 2 LOC685244 0.37±0.04

Similar to IQ motif and WD repeats 1 (predicted) RGD1561961\_preditce 1.59±0.04

similar to isochorismatase domain containing 2 LOC684270 3.98±0.55

similar to isopentenyl diphosphate delta-isomerase type 2 (predicted) LOC689842 /// RGD150 0.49±0.69

similar to jumonji domain containing 1B LOC682469 2.03±0.17

similar to jumonji domain containing 2B LOC301128 0.63±0.16

similar to jumonji protein LOC681740 1.84±0.24

similar to Jumonji/ARID domain-containing protein 1C (SmcX protein) (predicted) RGD1560601\_preditce 2.27±0.22

similar to K04F10.2 LOC361646 0.63±0.07

similar to K11B4.2 LOC688966 1.33±0.06

similar to K11B4.2 LOC684626 /// LOC686 0.5±0.07

similar to KB07 protein (predicted) RGD1561940\_preditce 3.78±0.4

similar to Kelch domain containing 4 (predicted) RGD1561676\_preditce 0.33±0.01

similar to Kelch-like protein 3 (predicted) RGD1565218\_preditce 0.64±0.2

similar to keratinocytes associated protein 3 LOC683980 0.89±0.16

similar to KIAA0090 protein (predicted) RGD1310427\_preditce 0.68±0.1

similar to KIAA0157 gene product is novel. (predicted) RGD1308918\_preditce 1.08±0.13

Similar to KIAA0240 (predicted) RGD1305680\_preditce 0.61±0.06

similar to KIAA0335 RGD1305314 0.76±0.31

similar to KIAA0368 (predicted) RGD1306148\_preditce 3.11±0.43

similar to KIAA0372 gene product (predicted) RGD1306062\_preditce 0.89±0.08

similar to KIAA0406-like protein (predicted) RGD1562582\_preditce 1.76±0.04

similar to KIAA0423 (predicted) RGD1310474\_preditce 1.03±0.08

similar to KIAA0467 protein (predicted) RGD1308616\_preditce 1.44±0.03

similar to KIAA0528 protein (predicted) RGD1304592\_preditce 1.38±0.77

Similar to KIAA0564 protein (predicted) RGD1308772\_preditce 0.5±0.02

Similar to KIAA0597 protein (predicted) RGD1565757\_preditce 4.05±0.47

similar to KIAA0614 protein (predicted) RGD1309762\_preditce 1.56±0.11

Similar to KIAA0672 gene product RGD1305664 0.35±0.03

similar to KIAA0833 protein /// similar to calmodulin-binding transcription activator 1 LOC362665 /// LOC500 1.3±0.41

similar to KIAA0853 protein (predicted) RGD1563689\_preditce 1.87±1.07

Similar to KIAA0869 protein (predicted) RGD1308329\_preditce 0.42±0.01

similar to KIAA0892 protein (predicted) RGD1308759\_preditce 0.92±0.06

similar to KIAA0913 protein (predicted) RGD1309414\_preditce 1.45±0.34

similar to KIAA0947 protein (predicted) RGD1309747\_preditce 0.75±0.04

similar to KIAA0965 protein (predicted) RGD1564793\_preditce 0.78±0.06

similar to KIAA0999 protein LOC684112 2.19±0.37

similar to KIAA1007 protein; adrenal gland protein AD-005 RGD1308009 2.88±0.16

similar to KIAA1009 protein RGD1307365 0.31±0.03

similar to KIAA1078 protein (predicted) RGD1310950\_preditce 2.14±0.27

Similar to KIAA1183 protein (predicted) RGD1560435\_preditce 0.77±0.32

similar to KIAA1217 (predicted) RGD1563437\_preditce 2.47±0.9

similar to KIAA1267 protein (predicted) RGD1311429\_preditce 2.33±0.41

Similar to KIAA1280 protein (predicted) RGD1560666\_preditce 1.06±0.07

similar to KIAA1411 protein (predicted) RGD1304927\_preditce 0.8±0.14

similar to KIAA1582 protein (predicted) RGD1310027\_preditce 1.55±0.25

similar to KIAA1627 protein (predicted) RGD1304822\_preditce 1.91±0.16

similar to KIAA1636 protein (predicted) RGD1309285\_preditce 0.23±0.02

similar to KIAA1731 protein (predicted) RGD1311723\_preditce 0.2±0.09

similar to KIAA1841 protein (predicted) RGD1305110\_preditce 0.3±0.02

similar to KIAA2026 protein RGD1311595 0.98±0.12

similar to kynurenine formamidase rCG\_34031 0.8±0.02

Similar to Lethal giant larvae homolog 2 (predicted) RGD1560307\_preditce 3.2±0.2

similar to leucine rich repeat and fibronectin type III domain containing 4 LOC688721 1.01±0.26

similar to LEYDIG CELL TUMOR 10 KD PROTEIN LOC288913 3.35±0.35

similar to ligatin LOC498225 1.78±0.22

Similar to Lmnb2 protein (predicted) RGD1563803\_preditce 0.28±0.04

similar to LOC387763 protein (predicted) RGD1564664\_preditce 0.73±0.21

similar to LOC495800 protein LOC499770 0.25±0.29

similar to lymphocyte antigen 6 complex, locus E ligand LOC501282 3.41±0.28

similar to lysophosphatidylglycerol acyltransferase 1 LOC679692 1.81±0.65

similar to M phase phosphoprotein 6 LOC686999 1.72±0.21

similar to Maleylacetoacetate isomerase (MAAI) (Glutathione S-transferase zeta 1) (GSTZ1-1) LOC681913 3.41±0.84

similar to mammalian retrotransposon derived 8b LOC678880 5.18±0.45

similar to Map4k6-pending protein /// similar to misshapen-like kinase 1 isoform 1 LOC303259 /// LOC687 6.88±0.41

similar to MASK-4E-BP3 protein LOC682955 1.78±0.02

similar to MASK-4E-BP3 protein LOC679725 /// LOC682 1.44±0.19

similar to MASK-4E-BP3 protein LOC679725 0.41±0.2

similar to mbt domain containing 1 LOC688133 2.21±0.01

|                                                                                                                                        |                       |            |
|----------------------------------------------------------------------------------------------------------------------------------------|-----------------------|------------|
| similar to Mediator of RNA polymerase II transcription subunit 12 (Thyroid hormone receptor-associated protein complex 230 kDa compo   | LOC679693             | 1.28±0.09  |
| similar to mediator of RNA polymerase II transcription, subunit 18 homolog                                                             | LOC682988             | 1.06±0.54  |
| similar to melanoma inhibitory activity 3                                                                                              | LOC683007             | 3.52±0.05  |
| similar to membrane-associated RING-CH protein IX                                                                                      | LOC679272             | 0.96±0.2   |
| similar to Metaxin 1, isoform 2                                                                                                        | LOC295241             | 2.03±0.12  |
| similar to methionine adenosyltransferase II, beta /// methionine adenosyltransferase II, beta                                         | Mat2b /// MGC94725    | 9.86±0.08  |
| similar to Methionine-R-sulfoxide reductase (Selenoprotein X 1) (Selenoprotein R)                                                      | MGC105753             | 2.61±0.94  |
| similar to microfibrillar-associated protein 1 (predicted) /// microfibrillar-associated protein 1A                                    | Mfap1a /// RGD156414  | 1.78±0.14  |
| similar to microfilament and actin filament cross-linker protein isoform b                                                             | LOC362587             | 3.24±0.62  |
| similar to Microtubule-associated protein RP/EB family member 2 (APC-binding protein EB2) (End-binding protein 2) (EB2)                | LOC679221             | 1.4±0.4    |
| similar to Microtubule-associated serine/threonine-protein kinase 3                                                                    | LOC684053             | 0.38±0.03  |
| similar to mirror-image polydactyly 1                                                                                                  | LOC687620             | 1.11±0.18  |
| similar to mitochondria-associated granulocyte macrophage CSF signaling molecule (predicted)                                           | Magmas /// RGD15644   | 4.83±1.42  |
| similar to Mitochondrial 28S ribosomal protein S28 (S28mt) (MRP-S28)                                                                   | LOC679330             | 2.62±0.8   |
| similar to Mitochondrial 39S ribosomal protein L39 (L39mt) (MRP-L39)                                                                   | LOC684304             | 2.15±0.64  |
| similar to Mitochondrial carrier triple repeat 1 (predicted)                                                                           | LOC686727 /// Mcart2  | 1.85±0.64  |
| similar to mitochondrial hepatocellular carcinoma-downregulated carrier protein                                                        | LOC684556             | 0.34±0.27  |
| similar to mitochondrial ribosomal protein L10                                                                                         | LOC691075             | 2.7±0.18   |
| similar to mKIAA0215 protein (predicted)                                                                                               | RGD1563945_predicted  | 0.24±0.3   |
| similar to mKIAA0256 protein (predicted)                                                                                               | RGD1559930_predicted  | 0.71±0.4   |
| similar to mKIAA0317 protein (predicted)                                                                                               | RGD1307597_predicted  | 1.35±0.05  |
| similar to mKIAA0664 protein (predicted)                                                                                               | RGD1307222_predicted  | 10.52±1.06 |
| similar to mKIAA0738 protein (predicted)                                                                                               | RGD1565474_predicted  | 0.4±0.15   |
| similar to mKIAA0978 protein (predicted)                                                                                               | RGD1561878_predicted  | 1.21±0.57  |
| similar to mKIAA0998 protein (predicted)                                                                                               | RGD1563583_predicted  | 0.63±0.33  |
| similar to mKIAA1011 protein                                                                                                           | LOC366669             | 5.85±0.38  |
| similar to mKIAA1111 protein (predicted)                                                                                               | RGD1561065_predicted  | 1.17±0.07  |
| similar to mKIAA1208 protein (predicted)                                                                                               | RGD1564821_predicted  | 1.2±0.28   |
| similar to mKIAA1402 protein (predicted)                                                                                               | RGD1306404_predicted  | 0.24±0.02  |
| similar to mKIAA1429 protein (predicted)                                                                                               | RGD1559904_predicted  | 0.89±0.38  |
| similar to mKIAA1450 protein (predicted)                                                                                               | RGD1562174_predicted  | 0.99±0.07  |
| similar to mKIAA1461 protein                                                                                                           | LOC311026             | 0.52±0.03  |
| similar to mKIAA1604 protein (predicted)                                                                                               | RGD1565385_predicted  | 0.42±0.24  |
| similar to mKIAA1737 protein (predicted)                                                                                               | RGD1309492_predicted  | 2.67±0.25  |
| similar to mKIAA1797 protein (predicted)                                                                                               | RGD1311849_predicted  | 0.92±0.25  |
| similar to mKIAA1924 protein (predicted)                                                                                               | RGD1561785_predicted  | 0.31±0.1   |
| similar to mKIAA1931 protein (predicted)                                                                                               | RGD1562335_predicted  | 0.96±0.19  |
| similar to mKIAA2005 protein (predicted)                                                                                               | RGD1561472_predicted  | 0.54±0.21  |
| similar to mKIAA2005 protein (predicted)                                                                                               | LOC500013 /// RGD156  | 6.76±2.14  |
| similar to Mkrl1 protein                                                                                                               | MGC94941              | 1.39±0.12  |
| similar to modulator of estrogen induced transcription                                                                                 | RGD1307526            | 2.26±0.51  |
| similar to monogenic, audiogenic seizure susceptibility 1                                                                              | LOC685383             | 4.11±0.22  |
| similar to Mospd2 protein (predicted)                                                                                                  | RGD1563952_predicted  | 2.39±0.9   |
| Similar to Msx2-interacting protein (SPEN homolog) (SMART/HDAC1-associated repressor protein)                                          | LOC690911             | 1.16±0.53  |
| similar to multi sex combs CG 12058-PA                                                                                                 | LOC686883             | 2.93±0.24  |
| Similar to Murine homolog of human ftp-3                                                                                               | LOC308650             | 1.4±0.3    |
| similar to muscleblind-like 2 isoform 1                                                                                                | LOC680445             | 8.76±1.04  |
| Similar to Myc-associated zinc finger protein (MAZI) (Purine-binding transcription factor) (Pur-1)                                     | LOC691842             | 1.01±0.35  |
| Similar to myeloid/lymphoid or mixed lineage-leukemia translocation to 1 homolog                                                       | LOC301119             | 0.27±0.23  |
| similar to Myeloid/lymphoid or mixed-lineage leukemia protein 3 homolog (Histone-lysine N-methyltransferase, H3 lysine-4 specific MLL3 | LOC502710             | 3.71±0.18  |
| similar to myocyte enhancer factor 2C                                                                                                  | LOC309957             | 0.95±0.41  |
| similar to myosin XVIIIa                                                                                                               | LOC360570             | 4.28±0.36  |
| similar to MYST histone acetyltransferase monocytic leukemia 4 (predicted)                                                             | RGD1566399_predicted  | 1.72±0.01  |
| similar to NADH-ubiquinone oxidoreductase B9 subunit (Complex I-B9) (CI-B9)                                                            | LOC683547             | 26.09±3.03 |
| similar to NADH-ubiquinone oxidoreductase PDSW subunit (Complex I-PDSW) (CI-PDSW)                                                      | LOC681418 /// LOC681  | 19.21±3.55 |
| similar to Naglu (predicted)                                                                                                           | RGD1564228_predicted  | 4.26±1.47  |
| similar to Negative elongation factor D (NELF-D) (TH1-like protein)                                                                    | LOC679203             | 1.83±0.36  |
| Similar to nemo like kinase (predicted)                                                                                                | RGD1561602_predicted  | 0.34±0.06  |
| similar to nemo like kinase (predicted) /// nemo like kinase                                                                           | Nlk /// RGD1561440_pr | 1.65±0.62  |
| similar to neurobeachin (predicted)                                                                                                    | RGD1562629_predicted  | 4.07±1.3   |
| similar to NHP2-like protein 1 (High mobility group-like nuclear protein 2 homolog 1) ([U4/U6.U5] tri-snRNP 15.5 kDa protein) (OTK27)  | MGC72932              | 4.51±0.02  |
| similar to NICE-3                                                                                                                      | LOC361985             | 7.67±1.18  |
| similar to Nicotinamide riboside kinase 1                                                                                              | LOC499330             | 0.38±0.33  |
| similar to NMDA receptor regulated 1-like                                                                                              | LOC686240             | 0.28±0.03  |
| similar to NNX3 (predicted)                                                                                                            | RGD1310358_predicted  | 4±1.35     |
| similar to novel protein (HT036) (predicted)                                                                                           | RGD1561416_predicted  | 0.6±0.13   |
| similar to novel protein (predicted)                                                                                                   | RGD1563106_predicted  | 2.02±0.37  |
| similar to novel protein (predicted)                                                                                                   | RGD1560636_predicted  | 0.32±0.01  |
| similar to novel protein (predicted)                                                                                                   | RGD1566099_predicted  | 0.59±0.12  |
| similar to novel protein of unknown function (DUF423) family member (predicted)                                                        | RGD1563438_predicted  | 4.62±0.65  |
| similar to Nuclear membrane binding protein NUCLING (predicted)                                                                        | RGD1560011_predicted  | 0.45±0.22  |
| similar to nuclear receptor binding protein                                                                                            | LOC680451             | 5.49±0.1   |
| similar to Nucleolar protein 11                                                                                                        | LOC688235             | 1.61±0.24  |
| similar to nucleolar protein with MIF4G domain 1                                                                                       | LOC682058             | 0.78±0.07  |
| similar to O-acetyltransferase                                                                                                         | LOC678772             | 0.77±0.31  |
| similar to olfactory receptor 873                                                                                                      | LOC687016             | 1.19±0.39  |
| similar to Oligosaccharyl transferase 3 CG7748-PA                                                                                      | RGD1311563            | 11.21±0.96 |
| similar to oocyte-testis gene 1 (predicted)                                                                                            | RGD1307158_predicted  | 0.57±0.17  |
| similar to OPA3 protein (predicted)                                                                                                    | RGD1561117_predicted  | 1.76±0.18  |
| Similar to oxoglutarate dehydrogenase (lipoamide)                                                                                      | LOC360975             | 0.61±0.17  |
| similar to p150 target of rapamycin (TOR)-scaffold protein containing WD-repeats (predicted)                                           | RGD1311784_predicted  | 0.76±0.17  |
| similar to Paired amphipathic helix protein Sin3b (Transcriptional corepressor Sin3b) (Histone deacetylase complex subunit Sin3b)      | LOC683381             | 3.33±0.17  |
| similar to pancreatitis-induced protein 49                                                                                             | RGD1308600            | 0.93±0.48  |
| similar to Peptide chain release factor 1, mitochondrial precursor (MRF-1)                                                             | LOC686234             | 0.47±0.11  |
| similar to peptide deformylase-like protein                                                                                            | LOC690214             | 1.04±0.35  |
| similar to peptidyl prolyl isomerase H (predicted)                                                                                     | RGD1564921_predicted  | 1.09±0.06  |
| similar to peptidylglycine alpha-amidating monooxygenase COOH-terminal interactor; peptidylglycine alpha-amidating monooxygenase C     | RGD1309847_predicted  | 0.83±0.05  |

|                                                                                                                                   |                       |            |
|-----------------------------------------------------------------------------------------------------------------------------------|-----------------------|------------|
| similar to Peptidyl-prolyl cis-trans isomerase NIMA-interacting 4 (Rotamase Pin4) (PPIase Pin4)                                   | LOC684441             | 2.83±1.7   |
| similar to peptidylprolyl isomerase D                                                                                             | LOC295142 /// LOC364  | 0.38±0.07  |
| similar to pericentrin                                                                                                            | LOC687681             | 0.85±0.09  |
| similar to Peroxidase CG12002-PA (predicted)                                                                                      | RGD1308720_predicte   | 0.5±0.06   |
| similar to Peroxisomal biogenesis factor 19 (Peroxin-19) (Peroxisomal farnesylated protein)                                       | LOC289233             | 1.46±0.05  |
| similar to PES1 protein                                                                                                           | LOC289740             | 0.59±0.11  |
| Similar to PHD finger protein 14 isoform 1 (predicted)                                                                            | RGD1563764_predicte   | 1.36±0.58  |
| similar to PHD zinc finger containing protein JUNE1                                                                               | MGC94192              | 1.27±0.58  |
| similar to PHF21A protein (predicted)                                                                                             | RGD1560612_predicte   | 0.43±0.14  |
| similar to phosphoserine-tRNA kinase (predicted)                                                                                  | RGD1564300_predicte   | 5.28±0.56  |
| Similar to PI-3-kinase-related kinase SMG-1                                                                                       | Arl6ip1               | 3.2±0.61   |
| similar to Placental protein 25 homolog (PP25)                                                                                    | LOC685284             | 0.78±0.12  |
| similar to plasma kallikrein-like protein 4 precursor /// gene trap locus 3                                                       | Gli3 /// RGD1307877   | 1.55±0.65  |
| similar to plexin 1 (predicted)                                                                                                   | RGD1560871_predicte   | 1.04±0.42  |
| similar to polyglutamine-containing protein                                                                                       | RGD1310994            | 8.39±0.84  |
| similar to POT1-like telomere end-binding protein                                                                                 | LOC500054             | 1.41±0.03  |
| similar to potassium channel modulatory factor 1                                                                                  | LOC684322             | 4.02±0.76  |
| similar to praja1, RING-H2 motif containing                                                                                       | LOC683077             | 3.96±0.91  |
| similar to predicted CDS, putative protein of bilateral origin (4J193)                                                            | RGD1306153            | 0.34±0.08  |
| similar to prefoldin 4 (predicted)                                                                                                | RGD1560211_predicte   | 2.43±0.57  |
| similar to Prefoldin subunit 2 /// prefoldin 2                                                                                    | LOC678975 /// Pfdn2   | 0.53±0.16  |
| similar to Prefoldin subunit 3 (Von Hippel-Lindau-binding protein 1) (VHL-binding protein 1) (VBP-1)                              | LOC681825             | 1.12±0.13  |
| similar to PRO1853 homolog                                                                                                        | RGD1311578            | 0.86±0.09  |
| similar to Probable ATP-dependent RNA helicase DHX34 (DEAH box protein 34)                                                        | LOC684903             | 0.76±0.17  |
| similar to procollagen C-endopeptidase enhancer 2                                                                                 | LOC684050             | 0.27±0.19  |
| similar to product is unknown-seizure-related gene (predicted) /// similar to Ornithine decarboxylase antizyme 2 (ODC-Az 2) (AZ2) | LOC690789 /// RGD15t  | 4.82±1.35  |
| similar to Proline oxidase, mitochondrial precursor (Proline dehydrogenase)                                                       | LOC680409             | 1.48±0.42  |
| similar to Protease-associated domain-containing protein of 21 kDa precursor                                                      | LOC686393             | 1.14±0.08  |
| similar to Proteasome inhibitor PI31 subunit                                                                                      | LOC682071 /// LOC68E  | 1.76±0.04  |
| similar to Protein C12orf11 (Sarcoma antigen NY-SAR-95)                                                                           | LOC690728             | 0.7±1      |
| similar to Protein C18orf1                                                                                                        | LOC679578             | 0.21±0     |
| similar to Protein C20orf20                                                                                                       | RGD1308612            | 2.51±0.26  |
| Similar to Protein C22orf5                                                                                                        | RGD1306591            | 1.9±0.81   |
| similar to protein C33A12.3                                                                                                       | RGD1359508            | 1±0.05     |
| similar to Protein C6orf115                                                                                                       | LOC684848 /// LOC68E  | 0.5±0.06   |
| similar to Protein C6orf203                                                                                                       | LOC683897             | 4.68±1.69  |
| similar to Protein C7orf26 homolog                                                                                                | LOC683674             | 2.04±0.56  |
| similar to Protein C8orf4 (Thyroid cancer protein 1) (TC-1)                                                                       | LOC684871             | 13.04±3.61 |
| similar to Protein CGI-117 (Protein HSPC111) (predicted)                                                                          | RGD1305727_predicte   | 2.36±0.24  |
| similar to Protein disulfide-isomerase TXNDC10 precursor (Thioredoxin domain-containing protein 10)                               | LOC682967             | 3.18±0.82  |
| similar to Protein FAM60A (Tera protein)                                                                                          | LOC686611             | 0.95±0.22  |
| similar to Protein KIAA0280                                                                                                       | LOC503175 /// LOC69C  | 7.61±0.69  |
| similar to Protein KIAA1404                                                                                                       | LOC686701             | 0.8±0.17   |
| similar to Protein KIAA1543                                                                                                       | LOC682941 /// LOC68E  | 1.02±0.16  |
| similar to Protein KIAA1688                                                                                                       | LOC500901             | 0.82±0.1   |
| similar to Protein Njmu-R1 (predicted)                                                                                            | RGD1310429_predicte   | 0.47±0.02  |
| Similar to protein phosphatase 1, regulatory (inhibitor) subunit 14B                                                              | Ppp1r14b              | 0.21±0.12  |
| similar to Protein SYS1 homolog                                                                                                   | LOC685079             | 4.34±0.4   |
| similar to Protein transport protein SEC61 gamma subunit                                                                          | LOC689134             | 12.54±2.81 |
| similar to protein tyrosine phosphatase, receptor type, D (predicted)                                                             | RGD1561090_predicte   | 9.3±0.3    |
| similar to Protein UNQ655/PRO1286 homolog precursor                                                                               | LOC686324             | 2.28±0.42  |
| Similar to putative phosphoinositide 5-phosphatase type II; C62                                                                   | LOC287533             | 0.69±0.35  |
| similar to Putative protein 15E1.2 (predicted)                                                                                    | RGD1309698_predicte   | 0.51±0.04  |
| similar to putative protein, with at least 9 transmembrane domains, of eukaryotic origin (43.9 kD) (2G415)                        | RGD1309228            | 0.55±0.1   |
| similar to putative repair and recombination helicase RAD26L (predicted)                                                          | RGD1561537_predicte   | 1.61±0.4   |
| similar to putative RNA methyltransferase (predicted)                                                                             | RGD1309077_predicte   | 0.22±0.13  |
| similar to Putative RNA-binding protein 15 (RNA-binding motif protein 15) (One-twenty two protein)                                | LOC684233             | 2.08±0.13  |
| similar to R31449_3 (predicted)                                                                                                   | RGD1563634_predicte   | 0.67±0.17  |
| similar to RAB11 family interacting protein 5 (class I) isoform 1                                                                 | LOC312502             | 3.14±0.16  |
| similar to RAB3 GTPase-activating protein (predicted)                                                                             | RGD1306487_predicte   | 2.52±0.58  |
| similar to ras homolog gene family, member f                                                                                      | LOC687609             | 2.42±0.95  |
| Similar to Ras suppressor protein 1                                                                                               | LOC680419             | 0.73±0.52  |
| similar to Ras-related protein Rab-1B /// RAB1B, member RAS oncogene family                                                       | MGC105830 /// rCG_4f  | 4.24±0.27  |
| similar to RCK (predicted)                                                                                                        | RGD1564560_predicte   | 3.26±0.85  |
| similar to receptor-interacting factor 1                                                                                          | RGD1306520            | 0.25±0.46  |
| similar to Recombining binding protein suppressor of hairless (J kappa-recombination signal binding protein) (RBP-J kappa)        | LOC679028             | 2.26±0.03  |
| similar to reduced expression 2                                                                                                   | LOC690559             | 0.22±0.29  |
| similar to replication protein-binding trans-activator RBT1                                                                       | MGC108974             | 0.98±0.11  |
| similar to REST corepressor 3                                                                                                     | LOC684192             | 1.65±0.24  |
| Similar to Retinoblastoma-binding protein 2 (RBBP-2)                                                                              | LOC312678             | 2.39±0.14  |
| similar to Retinoic acid receptor gamma-A (RAR-gamma-A)                                                                           | LOC685072             | 0.76±0.4   |
| similar to Rho guanine nucleotide exchange factor (GEF) 10 (predicted)                                                            | RGD1565043_predicte   | 0.9±0.17   |
| similar to ribosomal protein L22 proprotein                                                                                       | LOC365157             | 1.64±0.23  |
| similar to ribosomal protein L27a (predicted)                                                                                     | RGD1560633_predicte   | 1.6±0.35   |
| similar to ribosomal protein, mitochondrial, S22                                                                                  | LOC683519             | 2.11±0.14  |
| similar to RIKEN cDNA 0610007P06                                                                                                  | LOC293103             | 3.97±0.22  |
| similar to RIKEN cDNA 0610007P22 (predicted)                                                                                      | RGD1565744_predicte   | 0.95±0.1   |
| Similar to RIKEN cDNA 0610010D20 (predicted)                                                                                      | RGD1310475_predicte   | 3.85±0.32  |
| similar to RIKEN cDNA 0610011L14 gene                                                                                             | RGD1311066            | 0.98±0.12  |
| similar to RIKEN cDNA 0610037D15                                                                                                  | LOC298442             | 0.34±0.05  |
| similar to RIKEN cDNA 0610037L13                                                                                                  | RGD1559786            | 2.6±0.76   |
| similar to RIKEN cDNA 0610037P05                                                                                                  | RGD1305823            | 4.13±0.62  |
| similar to RIKEN cDNA 0610038D11 (predicted)                                                                                      | RGD1309710_predicte   | 2.79±0.05  |
| similar to RIKEN cDNA 0610038L10 gene (predicted) /// riboflavin kinase /// similar to riboflavin kinase (predicted)              | Rfk /// RGD1560961_pi | 6.78±1.07  |
| similar to RIKEN cDNA 0610039J04                                                                                                  | RGD1562218            | 0.86±0.37  |
| similar to RIKEN cDNA 0610039K22 (predicted) /// similar to CG3295-PA /// similar to RIKEN cDNA 0610039K22                        | LOC361780 /// MGC11   | 0.41±0.04  |
| similar to RIKEN cDNA 0610040J01                                                                                                  | LOC498368             | 1.73±0.09  |

similar to RIKEN cDNA 0710008K08 (predicted)  
similar to RIKEN cDNA 1110001A07 gene /// hypothetical protein LOC687897 /// hypothetical protein LOC691962  
similar to RIKEN cDNA 1110001J03  
similar to RIKEN cDNA 1110001M20 (predicted)  
similar to RIKEN cDNA 1110003E01  
similar to RIKEN cDNA 1110004E09  
similar to RIKEN cDNA 1110005A03  
similar to RIKEN cDNA 1110007C09 (predicted)  
similar to RIKEN cDNA 1110007L15 (predicted)  
similar to RIKEN cDNA 1110008F13  
similar to RIKEN cDNA 1110008J03 (predicted)  
similar to RIKEN cDNA 1110012L19 (predicted)  
similar to RIKEN cDNA 1110018J12 (predicted)  
Similar to RIKEN cDNA 1110020A23 (predicted)  
similar to RIKEN cDNA 1110031I02  
Similar to RIKEN cDNA 1110038F21 (predicted)  
similar to RIKEN cDNA 1110059E24  
similar to RIKEN cDNA 1110059G10  
similar to RIKEN cDNA 1190005P17 (predicted)  
similar to RIKEN cDNA 1200003C05 (predicted)  
similar to RIKEN cDNA 1200009B18; EST AA408438  
similar to RIKEN cDNA 1200011I18  
similar to RIKEN cDNA 1200011M11 (predicted)  
similar to RIKEN cDNA 1200013P24  
similar to RIKEN cDNA 1200014J11 (predicted)  
similar to RIKEN cDNA 1200014M14  
similar to RIKEN cDNA 1200016B10 (predicted)  
similar to RIKEN cDNA 1300018I05  
similar to RIKEN cDNA 1500002O20  
similar to RIKEN cDNA 1500003O22  
similar to RIKEN cDNA 1500011H22  
similar to RIKEN cDNA 1500031L02  
similar to RIKEN cDNA 1600012F09 (predicted)  
similar to RIKEN cDNA 1600029D21  
similar to RIKEN cDNA 1700012G19 gene (predicted)  
similar to RIKEN cDNA 1700023M03  
Similar to RIKEN cDNA 1700027M01  
similar to RIKEN cDNA 1700027N10 (predicted)  
similar to RIKEN cDNA 1700037H04  
similar to RIKEN cDNA 1700040L02 (predicted)  
similar to RIKEN cDNA 1700052N19  
similar to RIKEN cDNA 1700088E04  
similar to RIKEN cDNA 1700108L22  
similar to RIKEN cDNA 1810014F10 gene (predicted)  
similar to RIKEN cDNA 1810020D17 (predicted)  
similar to RIKEN cDNA 1810021J13  
similar to RIKEN cDNA 1810022C23  
similar to RIKEN cDNA 1810030N24 (predicted)  
similar to RIKEN cDNA 1810030O07 (predicted)  
Similar to RIKEN cDNA 1810036I24 (predicted)  
similar to RIKEN cDNA 1810042K04 (predicted)  
similar to RIKEN cDNA 1810043G02; DNA segment, Chr 10, Johns Hopkins University 13, expressed  
similar to RIKEN cDNA 1810046J19 (predicted)  
similar to RIKEN cDNA 1810063B07 gene (predicted)  
similar to RIKEN cDNA 1810074P20 (predicted)  
similar to RIKEN cDNA 2010011I20 (predicted)  
similar to RIKEN cDNA 2010012F05 (predicted)  
Similar to RIKEN cDNA 2010012O05 (predicted)  
similar to RIKEN cDNA 2010107G23 (predicted) /// hypothetical protein LOC679430  
similar to RIKEN cDNA 2010110K16 (predicted)  
similar to RIKEN cDNA 2010200O16 (predicted)  
similar to RIKEN cDNA 2010301N04 (predicted)  
similar to RIKEN cDNA 2010309E21 (predicted)  
similar to RIKEN cDNA 2010311D03  
similar to RIKEN cDNA 2010316F05 (predicted)  
similar to RIKEN cDNA 2210009G21 (predicted)  
similar to RIKEN cDNA 2210010N04 gene  
similar to RIKEN cDNA 2210012G02  
similar to RIKEN cDNA 2210016L21 gene  
similar to RIKEN cDNA 2310001A20  
similar to RIKEN cDNA 2310002J15 (predicted)  
similar to RIKEN cDNA 2310004I24 gene  
Similar to RIKEN cDNA 2310005N03 gene  
similar to RIKEN cDNA 2310007F12 (predicted)  
similar to RIKEN cDNA 2310008H04 (predicted)  
similar to RIKEN cDNA 2310011J03  
similar to RIKEN cDNA 2310016C16 (predicted)  
similar to RIKEN cDNA 2310022B05 (predicted)  
similar to RIKEN cDNA 2310028N02  
similar to RIKEN cDNA 2310033P09  
similar to RIKEN cDNA 2310035C23 (predicted)  
similar to RIKEN cDNA 2310036O22 (predicted) /// similar to CG18809-PA, isoform A  
similar to RIKEN cDNA 2310042G06  
similar to RIKEN cDNA 2310045A20 (predicted)  
similar to RIKEN cDNA 2310047O13 (predicted)  
similar to RIKEN cDNA 2310057M21  
similar to RIKEN cDNA 2310061F22  
RGD1562691\_preditce 0.4±0.2  
LOC687897 /// LOC6911.57±0.2  
MGC112899 10.49±1.22  
RGD1310313\_preditce 18.7±2.12  
RGD1311122 3.67±0.12  
RGD1306954 1.89±0.27  
RGD1306284 2.17±0.47  
RGD1306058\_preditce 3.89±0.41  
RGD1311660\_preditce 2.38±0.11  
RGD1307752 10.36±0.12  
RGD1306772\_preditce 0.41±0.3  
RGD1562747\_preditce 1.38±0  
RGD1565310\_preditce 1.35±0.14  
RGD1308134\_preditce 1.52±0.08  
RGD1305007 4±0.71  
RGD1562059\_preditce 4.5±0.19  
RGD1359158 1.5±0.19  
RGD1311745 2.67±0.35  
RGD1308261\_preditce 1.23±0.62  
RGD1308917\_preditce 3.92±0.02  
RGD1310606 3.4±0.29  
RGD1307254 0.23±0.16  
RGD1306862\_preditce 0.7±0.37  
RGD1308915 1.86±0.78  
RGD1308139\_preditce 1.77±0.13  
RGD1310597 0.24±0.22  
RGD1308695\_preditce 1.54±0.48  
RGD1307801 3.43±0.23  
RGD1309888 1.07±0.24  
RGD1308302 0.84±0.37  
RGD1310861 2.07±0.64  
RGD621352 3.17±0.22  
RGD1306613\_preditce 2.69±0.69  
LOC363060 7.81±0.75  
RGD1307773\_preditce 3.74±0.48  
RGD1305457 0.57±0.15  
RGD1311815 1.93±0.15  
RGD1310693\_preditce 0.69±0.27  
RGD1311739 1.22±0.01  
RGD1306739\_preditce 2.12±0.35  
RGD1305235 2.62±1.35  
RGD1359634 0.58±0.07  
RGD1307509 1.53±0.55  
RGD1311186\_preditce 5±1.28  
RGD1561459\_preditce 2.55±0.27  
RGD1311364 2.74±0.67  
RGD1310224 2.23±1.37  
RGD1305158\_preditce 2.54±0.8  
RGD1565685\_preditce 3.38±0.97  
RGD1306343\_preditce 7.36±0.57  
RGD1305593\_preditce 1.64±0.06  
RGD1309594 1.16±0.18  
RGD1306682\_preditce 5.16±1.45  
RGD1310877\_preditce 0.82±0.27  
RGD1309308\_preditce 1.18±0.06  
RGD1311378\_preditce 1.23±0.13  
RGD1309846\_preditce 7.42±0.98  
RGD1311783\_preditce 3.48±0.4  
LOC679430 /// RGD13( 6.56±0.56  
RGD1305283\_preditce 1.51±0.48  
RGD1564454\_preditce 2.81±0.1  
RGD1565557\_preditce 0.64±0.36  
RGD1304825\_preditce 1.71±0.16  
RGD1303272 5.65±0.69  
RGD1308179\_preditce 0.4±0.17  
RGD1563120\_preditce 0.32±0.06  
RGD1306873 0.27±0.1  
LOC366431 0.93±0.13  
RGD1311899 2.43±0.35  
RGD1308874 1.3±1.44  
RGD1560880\_preditce 0.24±0.01  
RGD1309906 0.49±0.22  
RGD1309105\_preditce 1.36±0.45  
RGD1562416\_preditce 1.03±0.27  
RGD1566036\_preditce 0.57±0.33  
RGD1359127 3±0.61  
RGD1307506\_preditce 3.6±0.56  
RGD1559896\_preditce 0.34±0.26  
RGD1359339 0.57±0.03  
RGD1304587 1.45±0.34  
RGD1307235\_preditce 1.66±0.25  
LOC690331 /// RGD15( 4.95±0.42  
MGC72955 2.81±1.07  
RGD1562860\_preditce 0.21±0.1  
RGD1309605\_preditce 2.57±0.17  
RGD1305014 0.34±0.14  
LOC292069 0.3±0.01

similar to RIKEN cDNA 2310079N02 (predicted)

similar to RIKEN cDNA 2400003C14

similar to RIKEN cDNA 2400010D15

similar to RIKEN cDNA 2410002F23

similar to RIKEN cDNA 2410002O22 gene

similar to RIKEN cDNA 2410004B18 (predicted)

similar to RIKEN cDNA 2410016O06 (predicted)

similar to RIKEN cDNA 2410022L05 (predicted)

similar to RIKEN cDNA 2410025L10 (predicted)

similar to RIKEN cDNA 2510039O18 (predicted)

similar to RIKEN cDNA 2600017H02 (predicted)

similar to RIKEN cDNA 2610003J06

similar to RIKEN cDNA 2610019F03

similar to RIKEN cDNA 2610029G23 (predicted)

Similar to RIKEN cDNA 2610110G12

similar to RIKEN cDNA 2610205E22

similar to RIKEN cDNA 2610209A20 (predicted)

similar to RIKEN cDNA 2610301B20; EST AI428449

similar to RIKEN cDNA 2610304G08 gene (predicted)

similar to RIKEN cDNA 2610528E23

similar to RIKEN cDNA 2610528J11 (predicted)

similar to RIKEN cDNA 2700002I20

similar to RIKEN cDNA 2700038C09

similar to RIKEN cDNA 2700062C07

similar to RIKEN cDNA 2700081O15 (predicted)

similar to RIKEN cDNA 2810002N01

similar to RIKEN cDNA 2810403A07

similar to RIKEN cDNA 2810428I15 (predicted)

similar to RIKEN cDNA 2810432L12

Similar to RIKEN cDNA 2810443J12 (predicted)

similar to RIKEN cDNA 2810453I06

similar to RIKEN cDNA 2810485I05 (predicted)

similar to RIKEN cDNA 2900010J23

similar to RIKEN cDNA 2900010M23 (predicted)

similar to RIKEN cDNA 2900092E17

similar to RIKEN cDNA 3110001D03 (predicted)

similar to RIKEN cDNA 3110001I22 (predicted)

similar to RIKEN cDNA 3110037I16 (predicted)

similar to RIKEN cDNA 3110040N11

similar to RIKEN cDNA 3110043O21

Similar to RIKEN cDNA 3110050N22 (predicted)

similar to RIKEN cDNA 3200002M19 (predicted)

similar to RIKEN cDNA 3930401K13

similar to RIKEN cDNA 4121402D02 (predicted)

similar to RIKEN cDNA 4632411B12

similar to RIKEN cDNA 4732418C07 (predicted)

similar to RIKEN cDNA 4833418A01 (predicted)

similar to RIKEN cDNA 4921524J17 (predicted)

similar to RIKEN cDNA 4930444A02

similar to RIKEN cDNA 4930455F23

similar to RIKEN cDNA 4930538D17

similar to RIKEN cDNA 4930550C14

similar to RIKEN cDNA 4930570C03

similar to RIKEN cDNA 4930579G22 (predicted)

similar to RIKEN cDNA 4931400A14 (predicted)

similar to RIKEN cDNA 4931406C07

similar to RIKEN cDNA 4931406P16 (predicted)

similar to RIKEN cDNA 4931414P19 (predicted)

similar to RIKEN cDNA 4932432K03

Similar to RIKEN cDNA 4933404M02

similar to RIKEN cDNA 4933406L09

similar to RIKEN cDNA 4933428G09 (predicted)

similar to RIKEN cDNA 4933433P14 gene

similar to RIKEN cDNA 4933435A13

Similar to RIKEN cDNA 5033406L14

similar to RIKEN cDNA 5033414D02 (predicted)

similar to RIKEN cDNA 5133400G04

similar to RIKEN cDNA 5133401N09

similar to RIKEN cDNA 5230400G24

similar to RIKEN cDNA 5330414D10 (predicted) /// hypothetical LOC366300

similar to RIKEN cDNA 5330440M15 /// coiled-coil domain containing 17

similar to RIKEN cDNA 5430437P03

similar to RIKEN cDNA 5630401D24 (predicted)

similar to RIKEN cDNA 5730449L18 (predicted)

similar to RIKEN cDNA 5730453I16

similar to RIKEN cDNA 5730454B08 (predicted)

Similar to RIKEN cDNA 5730469D23 (predicted)

similar to RIKEN cDNA 5730469M10

similar to RIKEN cDNA 5730509K17 gene (predicted)

similar to RIKEN cDNA 5730596K20 (predicted)

similar to RIKEN cDNA 5830433M19

Similar to RIKEN cDNA 5830446M03

Similar to RIKEN cDNA 6330406I15 (predicted)

similar to RIKEN cDNA 6330409N04

similar to RIKEN cDNA 6330416G13 gene (predicted)

similar to RIKEN cDNA 6430548M08 (predicted)

similar to RIKEN cDNA 6530403A03

RGD1306192\_preditce 3.95±0.4

RGD1307799 5.96±0.57

RGD1311805 0.89±0.36

RGD1309326 0.97±0.06

RGD1306583 3.92±0.64

RGD1560065\_preditce 1.69±0

RGD1307704\_preditce 0.4±0.03

RGD1565675\_preditce 1.79±0.34

RGD1563342\_preditce 1.78±0.13

RGD1305350\_preditce 0.77±0.31

RGD1561781\_preditce 0.52±0.53

RGD1307381 1.09±0.31

LOC498662 0.33±0.1

RGD1562502\_preditce 0.97±0.1

RGD1303066 0.26±0

RGD1306582 2.63±0.41

RGD1305211\_preditce 0.45±0.04

MGC94199 0.74±0.04

RGD1304782\_preditce 1.18±0.47

RGD1309437 0.83±0.18

RGD1305347\_preditce 6.19±0.93

RGD1307279 5.94±1.5

RGD1310660 2.49±0.8

MGC116121 1.04±0.06

RGD1560108\_preditce 1.02±0.13

RGD1304719 7.77±0.75

RGD1565775 4.03±0.48

RGD1566239\_preditce 1.28±0.29

RGD1307218 3.16±0.25

RGD1304868\_preditce 0.51±0.18

LOC498145 0.93±0.16

RGD1311077\_preditce 1.41±0.1

LOC499779 3.86±1.5

RGD1306917\_preditce 7.68±1.38

RGD1305592 0.65±0.21

RGD1309148\_preditce 2.36±0.06

RGD1305537\_preditce 0.86±0.33

RGD1309802\_preditce 0.26±0.08

RGD1305713 0.74±0.01

RGD1359108 0.45±0.16

RGD1311970\_preditce 2.64±0.35

RGD1311634\_preditce 2.82±0.01

RGD1309459 2.65±0.36

RGD1564778\_preditce 3.21±0.07

RGD1309220 2.03±0.13

RGD1310351\_preditce 1.73±0.42

RGD1565551\_preditce 0.35±0.03

RGD1308706\_preditce 3.05±0.49

RGD1310810 1.78±0.34

RGD1309708 0.7±0.16

RGD1309313 0.87±0.16

RGD1311251 1.04±0.47

LOC300191 3.13±0.36

RGD1560258\_preditce 0.97±0.2

RGD1307234\_preditce 1.1±0.8

RGD1309534 0.68±1.71

RGD1308428\_preditce 1.22±0.16

RGD1565222\_preditce 0.38±0.09

RGD1308087 1.05±0.21

LOC499806 0.58±0

LOC361016 0.3±0.01

RGD1311045\_preditce 0.48±0.17

RGD1308470 0.25±0.03

RGD1306402 0.33±0.06

RGD1305755 0.79±0.5

RGD1306839\_preditce 1.44±0.47

RGD1311742 0.6±0.06

MGC125086 0.39±0.06

RGD1310230 13.36±0.48

LOC366300 /// RGD1310230 0.33±0.09

Ccdc17 /// LOC313519 1.99±0.09

MGC94542 5.2±0.55

RGD1311526\_preditce 0.46±0.11

RGD1308584\_preditce 2.29±0.15

RGD1305441 4.61±1.3

RGD1308290\_preditce 2.14±1.42

RGD1308324\_preditce 0.96±0.8

RGD1309676 3.37±1.74

RGD1561042\_preditce 1.02±0.28

RGD1309871\_preditce 0.76±0.02

MGC125002 1.13±0.47

RGD1307688 0.64±0.04

RGD1307396\_preditce 9.48±0.57

RGD1306437 4.46±0.4

RGD1304595\_preditce 0.25±0.08

RGD1304884\_preditce 0.39±0.44

RGD1309020 0.45±0.04

|                                                                                                                                 |                      |            |
|---------------------------------------------------------------------------------------------------------------------------------|----------------------|------------|
| similar to RIKEN cDNA 8430406107                                                                                                | RGD1307465           | 1.1±0.09   |
| Similar to RIKEN cDNA 9030221M09 gene (predicted)                                                                               | RGD1305469_predicted | 2.25±0.05  |
| similar to RIKEN cDNA 9030624J02                                                                                                | LOC361635            | 1.96±0.07  |
| similar to RIKEN cDNA 9430023L20                                                                                                | RGD1359310           | 1.5±0.2    |
| Similar to RIKEN cDNA 9430077D24 gene                                                                                           | LOC290341            | 1.23±0.15  |
| similar to RIKEN cDNA 9430098E02 (predicted) /// hypothetical protein LOC680815                                                 | LOC680815 /// RGD151 | 1.87±0.22  |
| similar to RIKEN cDNA A030007L17; EST AA673177 (predicted) /// similar to C44B7.7                                               | LOC685702 /// RGD13  | 0.22±3.73  |
| similar to RIKEN cDNA A130042E20; open reading frame 57 (predicted)                                                             | RGD1308722_predicted | 0.27±0.1   |
| similar to RIKEN cDNA A430005L14                                                                                                | RGD1304567           | 1.76±0.2   |
| Similar to RIKEN cDNA A430093J20 gene                                                                                           | LOC367113            | 1.99±0.35  |
| similar to RIKEN cDNA A530088I07 gene                                                                                           | LOC311984            | 0.97±0.09  |
| similar to RIKEN cDNA A730011L01 gene                                                                                           | LOC498029            | 0.57±0.06  |
| similar to RIKEN cDNA A930008G19 (predicted)                                                                                    | RGD1310799_predicted | 1.03±0.01  |
| similar to RIKEN cDNA A930016P21 (predicted)                                                                                    | RGD1560629_predicted | 0.98±0.4   |
| similar to RIKEN cDNA B230118H07 (predicted)                                                                                    | RGD1309730_predicted | 6.13±0.23  |
| Similar to RIKEN cDNA B230312A22                                                                                                | RGD1311249           | 1.83±0.01  |
| similar to RIKEN cDNA B230380D07 (predicted)                                                                                    | RGD1311456_predicted | 1.96±0.14  |
| similar to RIKEN cDNA B630019K06 (predicted)                                                                                    | RGD1560784_predicted | 0.29±0.02  |
| similar to RIKEN cDNA B930062P21 gene (predicted)                                                                               | RGD1562562_predicted | 2.18±0.03  |
| similar to RIKEN cDNA C030006K11                                                                                                | MGC94207             | 4.56±1.34  |
| similar to RIKEN cDNA C130022K22 gene                                                                                           | RGD1305225           | 0.63±0.02  |
| similar to RIKEN cDNA C430004E15                                                                                                | LOC499749            | 3.29±0.29  |
| similar to RIKEN cDNA D030070L09                                                                                                | RGD1310199           | 1.89±0.18  |
| similar to RIKEN cDNA D130059P03 gene (predicted)                                                                               | RGD1310722_predicted | 2.01±0.64  |
| similar to RIKEN cDNA D230025D16Rik                                                                                             | RGD621098            | 0.43±0.13  |
| similar to RIKEN cDNA D530033C11 (predicted)                                                                                    | RGD1307179_predicted | 0.97±0.21  |
| similar to RIKEN cDNA D630029K19                                                                                                | RGD1307100           | 1.78±0.29  |
| similar to RIKEN cDNA D930015E06                                                                                                | LOC679811            | 0.3±0.07   |
| similar to RIKEN cDNA E130201N16 (predicted)                                                                                    | RGD1311589_predicted | 1.79±0.18  |
| similar to RIKEN cDNA E130308A19 (predicted)                                                                                    | RGD1310951_predicted | 0.67±0.16  |
| similar to RIKEN cDNA E230015L20 gene (predicted)                                                                               | RGD1560873_predicted | 0.86±0.02  |
| similar to RIKEN cDNA F730014I05 (predicted)                                                                                    | RGD1310800_predicted | 0.67±0.17  |
| similar to ring finger protein 13                                                                                               | LOC681578            | 8.03±0.88  |
| similar to ring finger protein 168                                                                                              | LOC684436            | 0.55±0.24  |
| Similar to RN49018 (predicted)                                                                                                  | RGD1305208_predicted | 0.93±0.16  |
| similar to RNA binding motif, single stranded interacting protein 3 isoform 1                                                   | LOC680726            | 11.14±0.58 |
| similar to RNA binding protein gene with multiple splicing (predicted)                                                          | RGD1561067_predicted | 6.93±0.45  |
| Similar to RNA binding protein with multiple splicing 2 (predicted)                                                             | RGD1561222_predicted | 4.17±0.32  |
| similar to RNA polymerase 1-3                                                                                                   | MGC112727            | 6.51±0.08  |
| Similar to RNA-binding protein Musashi2-S (predicted)                                                                           | RGD1560397_predicted | 1.01±0.32  |
| similar to RNA-binding region (RNP1, RRM) containing 3                                                                          | LOC686263            | 1.86±0.37  |
| similar to Rnf37-pending protein                                                                                                | RGD1305440           | 0.48±0.1   |
| similar to scaffold attachment factor B2                                                                                        | LOC301126            | 1.7±0.01   |
| Similar to SCO cytochrome oxidase deficient homolog 1 (yeast) (predicted)                                                       | RGD1559538_predicted | 2.26±0.51  |
| similar to Sec1 family domain containing protein 2 (Syntaxin binding protein 1-like 1) (Neuronal Sec1)                          | LOC498353            | 0.39±0.31  |
| similar to SEC22 vesicle trafficking protein-like 3                                                                             | LOC687022            | 1.05±0.04  |
| similar to SEC24 related gene family, member C                                                                                  | LOC685144            | 3.08±0.8   |
| similar to Selenoprotein H (predicted)                                                                                          | RGD1563348_predicted | 1.07±0.98  |
| similar to selenoprotein SelM (predicted)                                                                                       | RGD1565037_predicted | 1.1±0.36   |
| similar to semaF cytoplasmic domain associated protein 2                                                                        | LOC365960            | 1.68±0.25  |
| Similar to septin 10 isoform 1                                                                                                  | LOC309891            | 2.84±0.5   |
| similar to Ser/Thr-rich protein T10 in DGCR region (predicted)                                                                  | RGD1310348_predicted | 4.0±0      |
| Similar to Serine                                                                                                               | LOC691318            | 0.96±0.32  |
| Similar to Serine/threonine protein kinase 24 (predicted)                                                                       | RGD1561742_predicted | 0.48±0.11  |
| similar to serologically defined colon cancer antigen 3 isoform 1                                                               | LOC683605            | 0.47±0.13  |
| similar to Serum amyloid A-3 protein precursor                                                                                  | LOC687992            | 1.57±0.44  |
| similar to Sestrin 2 (HI95) (predicted)                                                                                         | RGD1566319_predicted | 3.1±0.37   |
| similar to Sfrs4 protein (predicted)                                                                                            | RGD1561347_predicted | 2.12±0.3   |
| Similar to SH3-domain binding protein 3                                                                                         | LOC688018            | 6.87±0.69  |
| similar to Shb protein (predicted)                                                                                              | RGD1565350_predicted | 3.16±0.36  |
| similar to sid2057p                                                                                                             | RGD1311703           | 4.26±0.61  |
| similar to signal peptidase complex subunit 3 homolog                                                                           | LOC680782            | 5.5±1.01   |
| similar to Signal recognition particle 9 kDa protein (SRP9) /// signal recognition particle 9                                   | LOC682826 /// Srp9   | 5.53±1.28  |
| similar to Ski protein (predicted)                                                                                              | RGD1565591_predicted | 2.87±1.37  |
| similar to Smad ubiquitination regulatory factor 1 isoform 2                                                                    | LOC690516            | 0.69±0.05  |
| similar to small nuclear ribonucleoprotein D3                                                                                   | LOC687711            | 6.49±0.32  |
| similar to small nuclear ribonucleoprotein polypeptide G                                                                        | LOC681031 /// LOC687 | 5.54±1.19  |
| Similar to small nuclear RNA activating complex, polypeptide 5                                                                  | LOC691501            | 0.97±0.32  |
| similar to small unique nuclear receptor co-repressor (predicted) /// nuclear DNA binding protein                               | C1d /// RGD1560600_c | 1.9±0.93   |
| similar to SMP3 mannosyltransferase /// similar to nuclear cap binding protein subunit 2                                        | LOC684506 /// LOC68  | 3.44±0.68  |
| similar to snRNP core protein SMX5                                                                                              | LOC684148            | 1.33±0.33  |
| similar to solute carrier family 25 (mitochondrial carrier, Aralar), member 12 (predicted)                                      | RGD1561141_predicted | 3.17±0.6   |
| Similar to solute carrier family 30 (zinc transporter), member 9                                                                | LOC498358            | 1.77±0.15  |
| Similar to Solute carrier family 35, member E3 (predicted)                                                                      | RGD1564876_predicted | 2.09±0.87  |
| similar to sorbin and SH3 domain containing 1 isoform 3                                                                         | LOC678826            | 4.95±0.16  |
| similar to sorting nexin 3                                                                                                      | LOC684097            | 23.99±0.42 |
| similar to Sorting nexin-9                                                                                                      | LOC683687            | 2.12±0.39  |
| similar to SPBPJ4664.02 (predicted) /// RGD1562079 (predicted)                                                                  | RGD1559845_predicted | 6.05±0.2   |
| similar to specifically androgen-regulated protein                                                                              | LOC498222            | 4.5±0.91   |
| similar to Sperm 1 POU-domain transcription factor (SPRM-1) (predicted)                                                         | RGD1305526_predicted | 2.66±0.16  |
| similar to spindlin                                                                                                             | LOC682571            | 12.05±1.15 |
| similar to spinster-like protein                                                                                                | RGD1305613           | 2.08±0.05  |
| similar to SP1a/RYanodine receptor SPRY (1J970) (predicted)                                                                     | RGD1308847_predicted | 0.66±0.05  |
| similar to Splicing factor U2AF 35 kDa subunit (U2 auxiliary factor 35 kDa subunit) (U2 snRNP auxiliary factor small subunit)   | LOC687575            | 2.52±0.59  |
| similar to splicing factor, arginine/serine-rich 1 (ASF/SF2) /// splicing factor, arginine/serine-rich 1                        | LOC688114 /// Sfrs1  | 6.55±1.03  |
| Similar to splicing factor, arginine/serine-rich 2, interacting protein                                                         | LOC312030            | 1.25±0.08  |
| Similar to step II splicing factor SLU7; DNA segment, Chr 11, ERATO Doi 730, expressed; DNA segment, Chr 3, Brigham & Womens Ge | LOC303057            | 3.25±0.32  |



|                                                                                                                                              |                      |            |
|----------------------------------------------------------------------------------------------------------------------------------------------|----------------------|------------|
| similar to step II splicing factor SLU7; DNA segment, Chr 11, ERATO Doi 730, expressed; DNA segment, Chr 3, Brigham & Womens Ge              | LOC303057 /// Slu7   | 0.89±0.09  |
| Similar to Sterile alpha motif domain containing 10 (predicted)                                                                              | RGD1563203_predicte  | 0.59±0.09  |
| similar to sterile alpha motif domain containing 9-like                                                                                      | LOC500013            | 1.46±0.78  |
| similar to stromal membrane-associated protein 1                                                                                             | LOC684800            | 2.39±0.4   |
| similar to Sulfide:quinone oxidoreductase, mitochondrial precursor                                                                           | LOC691966            | 3.75±0.06  |
| similar to SUMO/sentrin specific protease 2                                                                                                  | LOC295194            | 1.01±0.15  |
| similar to SUMO/sentrin specific protease 5                                                                                                  | LOC686286            | 1.07±0.14  |
| similar to suppressor of hairy wing homolog 4 isoform 1 (predicted)                                                                          | RGD1560796_predicte  | 0.53±0.14  |
| similar to Suppressor of <i>S. cerevisiae</i> gcr2 (predicted)                                                                               | RGD1565023_predicte  | 1.07±0.04  |
| similar to SWI                                                                                                                               | LOC684513 /// LOC68E | 1.36±0.35  |
| similar to T03G11.6                                                                                                                          | LOC689540            | 12.21±1.99 |
| similar to TAF11 RNA polymerase II, TATA box binding protein (TBP)-associated factor (predicted)                                             | RGD1562272_predicte  | 0.41±0.1   |
| similar to talin 2 (predicted)                                                                                                               | RGD1565416_predicte  | 0.98±0.1   |
| similar to TBC1 domain family member 4 (Akt substrate of 160 kDa) (AS160)                                                                    | LOC686547            | 0.61±0.1   |
| similar to TBC1 domain family, member 8 (with GRAM domain); vascular Rab-GAP/TBC-containing (predicted)                                      | RGD1308221_predicte  | 4.31±0.65  |
| Similar to TBP-associated factor 172 (TAF-172) (TAF(II)170) (predicted)                                                                      | RGD1564130_predicte  | 1.16±0.51  |
| similar to TBP-associated factor 4                                                                                                           | LOC682097            | 3.01±0.36  |
| Similar to T-Brain-1                                                                                                                         | LOC311078            | 0.43±0.34  |
| similar to T-cell receptor alpha chain precursor V and C regions (TRA29)                                                                     | RGD1359684           | 3.71±0.98  |
| similar to testhymin (predicted)                                                                                                             | RGD1563612_predicte  | 0.24±0.19  |
| similar to THO complex subunit 4 (Tho4) (RNA and export factor binding protein 1) (REF1-I) (Ally of AML-1 and LEF-1) (Aly/REF)               | LOC688305            | 2.43±0.06  |
| similar to thymus atrophy-related protein (predicted)                                                                                        | RGD1304607_predicte  | 1.05±0.05  |
| Similar to TICAM-1                                                                                                                           | LOC363328            | 0.49±0.1   |
| similar to topoisomerase (DNA) II beta                                                                                                       | LOC361100            | 3.55±0.42  |
| similar to TR4 orphan receptor associated protein TRA16                                                                                      | LOC361128            | 2.14±0.06  |
| similar to transcription factor                                                                                                              | MGC112830            | 3.88±1.03  |
| similar to Transcription factor 7-like 2 (HMG box transcription factor 4) (T-cell-specific transcription factor 4) (TCF-4) (hTCF-4)          | LOC683733            | 2.76±0.09  |
| Similar to transcription factor 7-like 2, T-cell specific, HMG-box                                                                           | LOC679869            | 0.21±0.06  |
| similar to Transcription initiation factor TFIIID subunit 12 (Transcription initiation factor TFIIID 20 kDa subunits) (TAFII-20) (TAFII20)   | LOC682902            | 0.46±0.24  |
| similar to translocase of inner mitochondrial membrane 50 homolog                                                                            | LOC687295            | 2.59±0.25  |
| similar to translocase of the inner mitochondrial membrane 14 isoform a                                                                      | LOC683663            | 5.49±0.94  |
| similar to transmembrane protein 41a                                                                                                         | LOC681708            | 0.68±0.17  |
| similar to transmembrane protein 61                                                                                                          | LOC688864            | 1.14±0.43  |
| similar to Tripartite motif protein 47 /// tripartite motif-containing 47                                                                    | LOC688269 /// Trim47 | 2.26±0.12  |
| similar to TRS85 homolog (predicted)                                                                                                         | RGD1309102_predicte  | 1.62±0.14  |
| Similar to TSC22 domain family protein 2 (TSC22-related-inducible leucine zipper protein 4)                                                  | LOC499624            | 0.9±0.14   |
| similar to TSC22 domain family protein 4 (TSC22-related-inducible leucine zipper protein 2)                                                  | LOC686226            | 0.77±0.67  |
| similar to tyrosine kinase-associated leucine zipper protein LAZipII (predicted)                                                             | RGD1565584_predicte  | 2.17±0.25  |
| similar to U5 snRNP-specific protein (Prp8-binding) (predicted)                                                                              | RGD1309198_predicte  | 0.72±0.28  |
| similar to ubiquinol-cytochrome c reductase complex 7.2kDa protein isoform b                                                                 | LOC685322            | 47.13±0.4  |
| similar to Ubiquitin carboxyl-terminal hydrolase 21 (Ubiquitin thioesterase 21) (Ubiquitin-specific processing protease 21) (Deubiquitinatir | LOC678925 /// LOC68E | 1.8±0.06   |
| similar to ubiquitin protein ligase E3 component n-recogin 2                                                                                 | LOC363188            | 3.03±0.01  |
| similar to ubiquitin protein ligase E3B                                                                                                      | LOC687633            | 1.9±0.05   |
| similar to ubiquitin specific protease 34                                                                                                    | LOC360990            | 2.31±0.27  |
| similar to Ubiquitin-associated protein 2-like                                                                                               | LOC497952            | 1.92±0.12  |
| similar to ubiquitin-conjugating enzyme E2R 2                                                                                                | LOC689226            | 6.26±0.26  |
| similar to ubiquitin-protein ligase E3-alpha (predicted)                                                                                     | RGD1562326_predicte  | 0.75±0.44  |
| similar to uncharacterized hypothalamus protein HT013 (predicted)                                                                            | RGD1307071_predicte  | 0.8±0.07   |
| similar to UPF0197 protein C11orf10 homolog (predicted)                                                                                      | RGD1560328_predicte  | 6.02±0.62  |
| similar to UPF0308 protein C9orf21                                                                                                           | LOC498685            | 0.36±0.14  |
| similar to vacuolar protein sorting 13C protein (predicted)                                                                                  | RGD1560364_predicte  | 1.51±0.05  |
| Similar to Vacuolar protein sorting 26 homolog (VPS26 protein homolog)                                                                       | LOC300472            | 1.69±0.07  |
| similar to vacuolar protein sorting 37D                                                                                                      | LOC687208            | 1.4±0.5    |
| similar to Vps41 protein (predicted)                                                                                                         | RGD1560511_predicte  | 5.97±0.68  |
| similar to WAC (predicted)                                                                                                                   | RGD1562407_predicte  | 1.34±0.12  |
| similar to WD repeat domain 11 protein (predicted)                                                                                           | RGD1564964_predicte  | 0.95±0.44  |
| similar to WD repeat domain 74 /// WD repeat domain 74                                                                                       | LOC686449 /// Wdr74  | 0.89±0.1   |
| similar to Wdr8 protein                                                                                                                      | LOC366515            | 0.51±0.21  |
| Similar to XPA binding protein 1                                                                                                             | LOC688393            | 0.49±0.16  |
| similar to yippee-like 3 (predicted)                                                                                                         | RGD1564579_predicte  | 5.61±1.49  |
| similar to YY1-associated factor 2 /// YY1 associated factor 2                                                                               | LOC681599 /// Yaf2   | 0.63±0.07  |
| similar to Zinc finger CCCH-type domain containing protein 6                                                                                 | LOC678741            | 2.01±0.04  |
| Similar to Zinc finger CCHC domain-containing protein 6                                                                                      | LOC501515            | 1.48±0.58  |
| similar to zinc finger like protein 1                                                                                                        | LOC684755            | 0.93±0.21  |
| similar to Zinc finger protein 133                                                                                                           | LOC499900            | 0.35±0.12  |
| similar to zinc finger protein 146                                                                                                           | LOC687516            | 1.25±0.32  |
| similar to zinc finger protein 277 isoform 1                                                                                                 | LOC298977            | 1.03±0.03  |
| similar to Zinc finger protein 326 (Zinc finger protein-associated with nuclear matrix of 75 kDa)                                            | LOC682914            | 4.42±0.12  |
| similar to zinc finger protein 341                                                                                                           | LOC296300            | 0.43±0.04  |
| similar to zinc finger protein 385 /// zinc finger protein 385                                                                               | LOC683930 /// Zfp385 | 1.32±0.79  |
| similar to zinc finger protein 422, related sequence 1                                                                                       | LOC314600            | 2.17±1.28  |
| similar to zinc finger protein 426 (predicted)                                                                                               | RGD1564241_predicte  | 0.59±0.26  |
| similar to Zinc finger protein 551 (Zinc finger protein KOX23)                                                                               | LOC691396            | 0.77±0.03  |
| Similar to zinc finger protein 609 (predicted)                                                                                               | RGD1561651_predicte  | 0.81±0.16  |
| similar to Zinc finger protein 62 homolog (Zfp-62) (ZT3) (predicted)                                                                         | RGD1560191_predicte  | 0.39±0.51  |
| similar to zinc finger protein 639                                                                                                           | LOC683504            | 0.59±0.11  |
| similar to zinc finger protein 709                                                                                                           | LOC362845            | 0.33±0.14  |
| Similar to zinc finger protein 748 isoform 2                                                                                                 | LOC680222            | 0.79±0.15  |
| similar to zinc finger protein 75 (predicted)                                                                                                | RGD1565419_predicte  | 0.3±0.06   |
| similar to zinc finger protein 84 (HPF2)                                                                                                     | LOC691170            | 0.42±0.18  |
| similar to Zinc finger protein RP-8 CG3260-PA /// programmed cell death 2-like                                                               | LOC687670 /// Pdcd2l | 0.39±0.05  |
| similar to zinc finger, matrin type 2                                                                                                        | LOC679898            | 2.06±0.11  |
| similar to zinc finger, RAN-binding domain containing 3 (predicted)                                                                          | RGD1564952_predicte  | 0.33±0.05  |
| similar to zinc finger, ZZ domain containing 3                                                                                               | LOC310958            | 1.6±0.56   |
| Sin3A associated protein                                                                                                                     | Sap130               | 2.38±0.29  |
| Sin3-associated polypeptide 18                                                                                                               | Sap18                | 8.2±0.15   |
| sine oculis-related homeobox 4 homolog ( <i>Drosophila</i> ) (predicted)                                                                     | Six4_predicted       | 2.18±0.37  |

|                                                                                                         |                         |            |
|---------------------------------------------------------------------------------------------------------|-------------------------|------------|
| sine oculis-related homeobox 5 homolog (Drosophila) (predicted)                                         | Six5_predicted          | 0.6±0.02   |
| single immunoglobulin and toll-interleukin 1 receptor (TIR) domain                                      | Sigirr                  | 1.21±0.3   |
| single stranded DNA binding protein 3                                                                   | Ssbp3                   | 0.79±0.26  |
| single stranded DNA binding protein 4                                                                   | Ssbp4                   | 0.82±0.38  |
| single-minded homolog 1 (Drosophila)                                                                    | Sim1                    | 1.61±2.47  |
| single-minded homolog 2 (Drosophila)                                                                    | Sim2                    | 12.25±3.07 |
| single-stranded DNA binding protein 1                                                                   | Ssbp1                   | 2.43±0.41  |
| single-stranded DNA binding protein 2                                                                   | Ssbp2                   | 1.23±0.03  |
| sirtuin (silent mating type information regulation 2 homolog) 2 (S. cerevisiae)                         | Sirt2                   | 4.89±1     |
| sirtuin 3 (silent mating type information regulation 2, homolog) 3 (S. cerevisiae) (predicted)          | Sirt3_predicted         | 2.35±0.06  |
| sirtuin 4 (silent mating type information regulation 2 homolog) 4 (S. cerevisiae)                       | Sirt4                   | 0.59±0.21  |
| sirtuin 5 (silent mating type information regulation 2 homolog) 5 (S. cerevisiae)                       | Sirt5                   | 7.79±1.2   |
| sirtuin 6 (silent mating type information regulation 2, homolog) 6 (S. cerevisiae)                      | Sirt6                   | 1.37±0.06  |
| sirtuin 7 (silent mating type information regulation 2, homolog) 7 (S. cerevisiae) (predicted)          | Sirt7_predicted         | 1.35±0.18  |
| SIVA1, apoptosis-inducing factor                                                                        | Siva1                   | 1.24±0.19  |
| six transmembrane epithelial antigen of the prostate 2                                                  | Steap2                  | 4.38±0.06  |
| Sjogren syndrome antigen B                                                                              | Ssb                     | 4.92±0.57  |
| Sjogren's syndrome nuclear autoantigen 1 (predicted)                                                    | Ssna1_predicted         | 1.36±0.42  |
| skeletal muscle and kidney enriched inositol phosphatase                                                | Skip                    | 1.75±0.12  |
| SLAIN motif family, member 2                                                                            | Slain2                  | 3±0.67     |
| slingshot homolog 3 (Drosophila)                                                                        | Ssh3                    | 0.43±0.09  |
| Smad nuclear interacting protein 1                                                                      | Snip1                   | 0.76±0.18  |
| SMAD specific E3 ubiquitin protein ligase 2 (predicted)                                                 | Smurf2_predicted        | 1.54±0.43  |
| small cell adhesion glycoprotein                                                                        | Smagp                   | 8.91±0.15  |
| small EDRK-rich factor 2                                                                                | Serf2                   | 20.15±0.74 |
| small G protein signaling modulator 2                                                                   | Sgsm2                   | 0.74±0.17  |
| small G protein signaling modulator 3                                                                   | Sgsm3                   | 0.58±0.13  |
| small glutamine-rich tetratricopeptide repeat (TPR)-containing, alpha                                   | Sgta                    | 2.72±0.01  |
| Small glutamine-rich tetratricopeptide repeat (TPR)-containing, beta                                    | Sgtb                    | 0.23±0.11  |
| small inducible cytokine subfamily E, member 1                                                          | Scye1                   | 1.68±0.03  |
| small muscle protein, X-linked                                                                          | Smpx                    | 15.14±0.89 |
| small nuclear ribonucleoprotein D1 (predicted)                                                          | Snrpd1_predicted        | 0.71±0.07  |
| small nuclear ribonucleoprotein D2 /// similar to small nuclear ribonucleoprotein D2                    | LOC686737 /// Snrpd2    | 11.04±1.75 |
| small nuclear ribonucleoprotein E                                                                       | Snrpe                   | 11.9±1.96  |
| small nuclear ribonucleoprotein N                                                                       | Snrpn                   | 2.12±0.32  |
| small nuclear ribonucleoprotein N /// SNRPN upstream reading frame                                      | Snrpn /// Snurf         | 0.97±0.32  |
| small nuclear ribonucleoprotein polypeptide A                                                           | Snrpa                   | 0.41±0.06  |
| small nuclear ribonucleoprotein polypeptide F                                                           | Snrpf                   | 3.05±0.81  |
| small nuclear ribonucleoprotein polypeptides B and B1                                                   | Snrpb                   | 6.5±0.71   |
| small nuclear RNA activating complex, polypeptide 1 (predicted)                                         | Snapc1_predicted        | 0.41±0.27  |
| small nuclear RNA activating complex, polypeptide 2                                                     | Snapc2                  | 3.64±0.15  |
| small nuclear RNA activating complex, polypeptide 3                                                     | Snapc3                  | 1.04±0.1   |
| small nuclear RNA activating complex, polypeptide 4 (predicted)                                         | Snapc4_predicted        | 0.24±0.1   |
| small nuclear RNA activating complex, polypeptide 5                                                     | Snapc5                  | 0.65±0.2   |
| small nucleolar RNA host gene (non-protein coding) 8                                                    | Snhg8                   | 1.47±0.4   |
| small optic lobes homolog (Drosophila) (predicted)                                                      | Solh_predicted          | 0.81±0.19  |
| SMC6 structural maintenance of chromosomes 6-like 1 (yeast) (predicted)                                 | Smc6l1_predicted        | 1.38±0.27  |
| SMEK homolog 1, suppressor of mek1 (Dictyostelium)                                                      | Smek1                   | 3.29±0.48  |
| SMEK homolog 2, suppressor of mek1 (Dictyostelium)                                                      | Smek2                   | 2.87±0.61  |
| Smg-5 homolog, nonsense mediated mRNA decay factor (C. elegans)                                         | Smg5                    | 0.25±0.01  |
| Smg-6 homolog, nonsense mediated mRNA decay factor (C. elegans) /// similar to KIAA0732 protein         | RGD1309609 /// Smg6     | 0.61±0.02  |
| Smith-Magenis syndrome chromosome region, candidate 7-like                                              | Smcr7l                  | 0.76±0.19  |
| smoothelin                                                                                              | Smtn                    | 0.34±0.15  |
| smoothelin /// PDZ domain containing RING finger 3 (predicted)                                          | Pdzrn3_predicted /// Sn | 1.93±0.94  |
| smoothelin-like 2                                                                                       | Smtnl2                  | 5.56±0.59  |
| smoothened homolog (Drosophila)                                                                         | Smo                     | 0.73±0.45  |
| SMT3 suppressor of mif two 3 homolog 1 (yeast)                                                          | Sumo1                   | 6.25±0.26  |
| SMT3 suppressor of mif two 3 homolog 2 (yeast) /// similar to SMT3 suppressor of mif two 3 homolog 2    | LOC690244 /// Sumo2     | 16.8±2.41  |
| SMT3 suppressor of mif two 3 homolog 3 (S. cerevisiae)                                                  | Sumo3                   | 7.6±0.05   |
| smu-1 suppressor of mec-8 and unc-52 homolog (C. elegans)                                               | Smu1                    | 2.36±0.29  |
| SNAP-associated protein                                                                                 | Snapap                  | 2.61±0.02  |
| SNF1-like kinase 2 (predicted)                                                                          | Snf1lk2_predicted       | 1.49±0.02  |
| SNF2 histone linker PHD RING helicase (predicted)                                                       | Shprh_predicted         | 0.88±0.18  |
| Snf2-related CREBBP activator protein                                                                   | Srcap                   | 0.52±0.19  |
| SNF8, ESCRT-II complex subunit, homolog (S. cerevisiae)                                                 | Snf8                    | 4.87±0.11  |
| sno, strawberry notch homolog 1 (Drosophila)                                                            | Sbno1                   | 1.38±0.17  |
| snurportin 1                                                                                            | Snupn                   | 0.75±0.19  |
| soc-2 (suppressor of clear) homolog (C. elegans)                                                        | Shoc2                   | 0.97±0.36  |
| sodium channel and clathrin linker 1                                                                    | Sclt1                   | 0.98±0.05  |
| sodium channel modifier 1 (predicted)                                                                   | Scnm1_predicted         | 0.89±0.11  |
| sodium channel, nonvoltage-gated, type I, alpha                                                         | Scnn1a                  | 1.91±0.35  |
| sodium channel, voltage-gated, type I, beta                                                             | Scn1b                   | 2.57±0.03  |
| solute carrier family 1 (glial high affinity glutamate transporter), member 3                           | Slc1a3                  | 0.46±0.13  |
| solute carrier family 1 (neuronal/epithelial high affinity glutamate transporter, system Xag), member 1 | Slc1a1                  | 5.96±1.27  |
| solute carrier family 1 (neutral amino acid transporter), member 5                                      | Slc1a5                  | 6.96±0.02  |
| solute carrier family 10 (sodium/bile acid cotransporter family), member 3                              | Slc10a3                 | 0.75±0.12  |
| solute carrier family 10, member 2                                                                      | Slc10a2                 | 0.37±0.02  |
| solute carrier family 11 (proton-coupled divalent metal ion transporters), member 2                     | Slc11a2                 | 1.36±0.69  |
| solute carrier family 12 (potassium/chloride transporters), member 9                                    | Slc12a9                 | 1.09±0.03  |
| solute carrier family 12, member 1                                                                      | Slc12a1                 | 41.35±5.95 |
| solute carrier family 12, member 4                                                                      | Slc12a4                 | 0.3±0      |
| solute carrier family 12, member 6                                                                      | Slc12a6                 | 0.27±0.1   |
| solute carrier family 12, member 7                                                                      | Slc12a7                 | 1.92±0.31  |
| solute carrier family 15, member 4                                                                      | Slc15a4                 | 1.12±0.33  |
| solute carrier family 16 (monocarboxylic acid transporters), member 1                                   | Slc16a1                 | 1.83±0.02  |
| solute carrier family 16 (monocarboxylic acid transporters), member 7                                   | Slc16a7                 | 35.55±6.27 |
| solute carrier family 17 (anion/sugar transporter), member 5                                            | Slc17a5                 | 1.73±0.65  |

|                                                                                                                  |                    |            |
|------------------------------------------------------------------------------------------------------------------|--------------------|------------|
| solute carrier family 19 (sodium/hydrogen exchanger), member 1                                                   | Slc19a1            | 1.95±0.17  |
| solute carrier family 19 (thiamine transporter), member 2                                                        | Slc19a2            | 5.03±1.48  |
| solute carrier family 2 (facilitated glucose transporter), member 1                                              | Slc2a1             | 6.85±1.51  |
| solute carrier family 2 (facilitated glucose transporter), member 13                                             | Slc2a13            | 1.87±0.16  |
| solute carrier family 2 (facilitated glucose transporter), member 4                                              | Slc2a4             | 5.13±0.23  |
| solute carrier family 2, (facilitated glucose transporter) member 8                                              | Slc2a8             | 0.94±0.04  |
| solute carrier family 20 (phosphate transporter), member 1                                                       | Slc20a1            | 2.74±1.52  |
| solute carrier family 20, member 2                                                                               | Slc20a2            | 1.25±0.12  |
| solute carrier family 22 (organic cation transporter), member 15 (predicted)                                     | Slc22a15_predicted | 0.4±0.18   |
| solute carrier family 22 (organic cation transporter), member 17                                                 | Slc22a17           | 1.88±0.3   |
| solute carrier family 22 (organic cation transporter), member 4                                                  | Slc22a4            | 3.19±0.18  |
| solute carrier family 22 (organic cation transporter), member 5                                                  | Slc22a5            | 4.51±0.6   |
| solute carrier family 24 (sodium/potassium/calcium exchanger), member 6                                          | Slc24a6            | 1.83±0.5   |
| solute carrier family 25 (mitochondrial carnitine/acylcarnitine translocase), member 20                          | Slc25a20           | 3.26±0.07  |
| solute carrier family 25 (mitochondrial carrier, adenine nucleotide translocator), member 13                     | Slc25a13           | 4.65±0.71  |
| solute carrier family 25 (mitochondrial carrier, brain), member 14                                               | Slc25a14           | 0.2±0.11   |
| solute carrier family 25 (mitochondrial carrier, citrate transporter), member 1                                  | Slc25a1            | 3.45±0.48  |
| solute carrier family 25 (mitochondrial carrier, glutamate), member 22                                           | Slc25a22           | 0.85±0.01  |
| solute carrier family 25 (mitochondrial carrier, palmitoylcarnitine transporter), member 29                      | Slc25a29           | 3.58±0.19  |
| solute carrier family 25 (mitochondrial carrier, peroxisomal membrane protein), member 17 (predicted)            | Slc25a17_predicted | 4.46±0.19  |
| solute carrier family 25 (mitochondrial carrier, phosphate carrier), member 3                                    | Slc25a3            | 51.76±3.99 |
| solute carrier family 25 (mitochondrial carrier; adenine nucleotide translocator), member 4                      | Slc25a4            | 23.69±2.55 |
| solute carrier family 25 (mitochondrial carrier; adenine nucleotide translocator), member 5                      | Slc25a5            | 51.71±2.45 |
| solute carrier family 25 (mitochondrial carrier; dicarboxylate transporter), member 10                           | Slc25a10           | 6.84±0.64  |
| Solute carrier family 25 (mitochondrial carrier; ornithine transporter) member 15                                | Slc25a15           | 1.02±0.03  |
| solute carrier family 25 (mitochondrial carrier; oxoglutarate carrier), member 11                                | Slc25a11           | 7.79±0.82  |
| solute carrier family 25 (mitochondrial carrier; phosphate carrier), member 23                                   | Slc25a23           | 3.02±0.18  |
| solute carrier family 25, member 28                                                                              | Slc25a28           | 3.16±0.03  |
| Solute carrier family 25, member 30                                                                              | Slc25a30           | 2.93±1.8   |
| solute carrier family 25, member 35                                                                              | Slc25a35           | 1.78±0.7   |
| solute carrier family 25, member 36                                                                              | Slc25a36           | 14.5±1.23  |
| solute carrier family 25, member 38                                                                              | Slc25a38           | 1.69±0.33  |
| solute carrier family 25, member 39                                                                              | Slc25a39           | 17.1±2.38  |
| solute carrier family 25, member 44                                                                              | Slc25a44           | 0.88±0.28  |
| solute carrier family 25, member 46                                                                              | Slc25a46           | 6.84±3.23  |
| solute carrier family 27 (fatty acid transporter), member 1                                                      | Slc27a1            | 1.58±0.23  |
| solute carrier family 27 (fatty acid transporter), member 4                                                      | Slc27a4            | 3.07±0.19  |
| solute carrier family 29 (nucleoside transporters), member 2                                                     | Slc29a2            | 0.23±0.06  |
| solute carrier family 29 (nucleoside transporters), member 3                                                     | Slc29a3            | 0.37±0.26  |
| solute carrier family 3 (activators of dibasic and neutral amino acid transport), member 2                       | Slc3a2             | 9.91±2.14  |
| solute carrier family 30 (zinc transporter), member 1                                                            | Slc30a1            | 0.31±0.35  |
| solute carrier family 30 (zinc transporter), member 3                                                            | Slc30a3            | 1.07±0.05  |
| solute carrier family 30 (zinc transporter), member 4                                                            | Slc30a4            | 0.81±0.09  |
| solute carrier family 30 (zinc transporter), member 5 (predicted)                                                | Slc30a5_predicted  | 2±0.24     |
| solute carrier family 30 (zinc transporter), member 6 (predicted)                                                | Slc30a6_predicted  | 1.7±0.56   |
| solute carrier family 30 (zinc transporter), member 7                                                            | Slc30a7            | 0.59±0.19  |
| solute carrier family 30 (zinc transporter), member 9                                                            | Slc30a9            | 0.74±0.05  |
| solute carrier family 31 (copper transporters), member 1                                                         | Slc31a1            | 1.33±0.37  |
| solute carrier family 31, member 2                                                                               | Slc31a2            | 2.76±0.2   |
| solute carrier family 33 (acetyl-CoA transporter), member 1                                                      | Slc33a1            | 3.78±0.4   |
| solute carrier family 34 (sodium phosphate), member 1                                                            | Slc34a1            | 0.67±0.16  |
| solute carrier family 34 (sodium phosphate), member 2                                                            | Slc34a2            | 0.75±0.69  |
| solute carrier family 35 (CMP-sialic acid transporter), member 1 (predicted)                                     | Slc35a1_predicted  | 5.8±0.47   |
| Solute carrier family 35 (UDP-glucuronic acid/UDP-N-acetylgalactosamine dual transporter), member D1 (predicted) | Slc35d1_predicted  | 0.31±0.01  |
| solute carrier family 35 (UDP-N-acetylglucosamine (UDP-GlcNAc) transporter), member 3                            | Slc35a3            | 0.42±0.18  |
| solute carrier family 35, member A4                                                                              | Slc35a4            | 2.16±0.27  |
| solute carrier family 35, member A5                                                                              | Slc35a5            | 1.9±0.25   |
| solute carrier family 35, member B1                                                                              | Slc35b1            | 4.12±0.55  |
| solute carrier family 35, member B3 (predicted)                                                                  | Slc35b3_predicted  | 2.26±1.07  |
| solute carrier family 35, member B4 (predicted)                                                                  | Slc35b4_predicted  | 1±0.12     |
| solute carrier family 35, member C1 (predicted)                                                                  | Slc35c1_predicted  | 2.06±0.12  |
| solute carrier family 35, member C2                                                                              | Slc35c2            | 0.61±0.07  |
| solute carrier family 35, member E1                                                                              | Slc35e1            | 0.76±0.08  |
| solute carrier family 35, member E3                                                                              | Slc35e3            | 0.72±0.01  |
| solute carrier family 35, member E4                                                                              | Slc35e4            | 0.55±0.05  |
| solute carrier family 35, member F5 (predicted)                                                                  | Slc35f5_predicted  | 2.4±0.05   |
| solute carrier family 37 (glucose-6-phosphate transporter), member 4                                             | Slc37a4            | 3.49±0.08  |
| solute carrier family 37 (glycerol-3-phosphate transporter), member 1                                            | Slc37a1            | 5.25±1     |
| solute carrier family 38, member 1                                                                               | Slc38a1            | 0.97±0.09  |
| solute carrier family 38, member 10                                                                              | Slc38a10           | 2.45±0.93  |
| solute carrier family 38, member 2                                                                               | Slc38a2            | 5.94±0.41  |
| solute carrier family 38, member 4                                                                               | Slc38a4            | 0.37±0.04  |
| solute carrier family 38, member 6                                                                               | Slc38a6            | 0.5±0.06   |
| solute carrier family 39 (iron-regulated transporter), member 1                                                  | Slc40a1            | 2.09±0.11  |
| solute carrier family 39 (metal ion transporter), member 13                                                      | Slc39a13           | 3.69±0.69  |
| solute carrier family 39 (metal ion transporter), member 6                                                       | Slc39a6            | 0.37±0.13  |
| solute carrier family 39 (zinc transporter), member 10 (predicted)                                               | Slc39a10_predicted | 1.18±0.24  |
| solute carrier family 39 (zinc transporter), member 14 (predicted)                                               | Slc39a14_predicted | 0.79±0.15  |
| solute carrier family 39 (zinc transporter), member 2 (predicted)                                                | Slc39a2_predicted  | 0.73±0.05  |
| solute carrier family 39 (zinc transporter), member 3                                                            | Slc39a3            | 0.51±0.05  |
| solute carrier family 4 (anion exchanger), member 1, adaptor protein (predicted)                                 | Slc4a1ap_predicted | 1.07±0.32  |
| solute carrier family 4 (anion exchanger), member 2                                                              | Slc4a2             | 5.2±0.85   |
| solute carrier family 4 (anion exchanger), member 3                                                              | Slc4a3             | 0.4±0.1    |
| solute carrier family 4, sodium bicarbonate cotransporter, member 7                                              | Slc4a7             | 1.26±0.16  |
| solute carrier family 41, member 1 (predicted)                                                                   | Slc41a1_predicted  | 0.56±0.04  |
| solute carrier family 41, member 3                                                                               | Slc41a3            | 0.95±0.06  |
| solute carrier family 43, member 2 (predicted)                                                                   | Slc43a2_predicted  | 4.73±1.07  |

|                                                                                            |                      |            |
|--------------------------------------------------------------------------------------------|----------------------|------------|
| Solute carrier family 44, member 2 (predicted)                                             | Slc44a2_predicted    | 2.77±1.9   |
| solute carrier family 44, member 4                                                         | Slc44a4              | 1.28±0.82  |
| solute carrier family 45, member 3 (predicted)                                             | Slc45a3_predicted    | 2.42±1.27  |
| solute carrier family 45, member 4                                                         | Slc45a4              | 2.25±0.22  |
| solute carrier family 46, member 3                                                         | Slc46a3              | 0.58±0.19  |
| solute carrier family 5 (inositol transporters), member 3                                  | Slc5a3               | 24.15±0.41 |
| solute carrier family 5 (sodium-dependent vitamin transporter), member 6                   | Slc5a6               | 4.74±0.74  |
| solute carrier family 6 (neurotransmitter transporter), member 17                          | Slc6a17              | 7.69±0.96  |
| solute carrier family 6 (neurotransmitter transporter, betaine/GABA), member 12            | Slc6a12              | 4.79±3.2   |
| solute carrier family 6 (neurotransmitter transporter, creatine), member 8                 | Slc6a8               | 13.74±1.46 |
| solute carrier family 7 (cationic amino acid transporter, y+ system), member 5             | Slc7a5               | 0.39±0.17  |
| solute carrier family 7 (cationic amino acid transporter, y+ system), member 6 (predicted) | Slc7a6_predicted     | 3.3±1.03   |
| solute carrier family 7 (cationic amino acid transporter, y+ system), member 7             | Slc7a7               | 0.79±1.17  |
| solute carrier family 7, member 6 opposite strand                                          | Slc7a6os             | 1.1±0.19   |
| solute carrier family 9 (sodium/hydrogen exchanger), isoform 6                             | Slc9a6               | 2.43±0.56  |
| solute carrier family 9 (sodium/hydrogen exchanger), member 1                              | Slc9a1               | 0.75±0.22  |
| solute carrier family 9 (sodium/hydrogen exchanger), member 3                              | Slc9a3               | 20.32±0.86 |
| solute carrier family 9 (sodium/hydrogen exchanger), member 3 regulator 1                  | Slc9a3r1             | 0.72±2.73  |
| solute carrier organic anion transporter family, member 1a4                                | Slco1a4              | 0.21±0.42  |
| solute carrier organic anion transporter family, member 3a1                                | Slco3a1              | 1.55±0.41  |
| Son cell proliferation protein                                                             | Son                  | 4.07±0.52  |
| Son of sevenless homolog 1 (Drosophila)                                                    | Sos1                 | 1.97±0.05  |
| sorbin and SH3 domain containing 3                                                         | Sorbs3               | 1.96±0.23  |
| sorbitol dehydrogenase                                                                     | Sord                 | 0.28±0.93  |
| sorlin 1                                                                                   | Sort1                | 0.69±0.26  |
| sorlin-related receptor, LDLR class A repeats-containing                                   | Sort1                | 27.54±0.81 |
| sorlin-related VPS10 domain containing receptor 2 (predicted)                              | Sorcs2_predicted     | 0.28±0.05  |
| sorting and assembly machinery component 50 homolog (S. cerevisiae)                        | Samm50               | 13.71±0.51 |
| sorting nexin 1                                                                            | Snx1                 | 1.17±0.31  |
| sorting nexin 11                                                                           | Snx11                | 0.72±0.15  |
| sorting nexin 12 (predicted)                                                               | Snx12_predicted      | 1.36±0.16  |
| sorting nexin 13 (predicted)                                                               | Snx13_predicted      | 1.03±0.35  |
| sorting nexin 14 (predicted)                                                               | Snx14_predicted      | 1.82±0.29  |
| sorting nexin 15                                                                           | Snx15                | 1.52±0.11  |
| sorting nexin 16                                                                           | Snx16                | 2.04±0.25  |
| sorting nexin 17                                                                           | Snx17                | 2.33±1.08  |
| sorting nexin 18                                                                           | Snx18                | 1.71±0.3   |
| sorting nexin 19 (predicted)                                                               | Snx19_predicted      | 0.97±0.19  |
| sorting nexin 2 (predicted)                                                                | Snx2_predicted       | 11.26±5.75 |
| sorting nexin 25                                                                           | Snx25                | 0.96±0.05  |
| sorting nexin 26 (predicted)                                                               | Snx26_predicted      | 0.42±0.06  |
| sorting nexin 4 (predicted)                                                                | Snx4_predicted       | 2.44±0.03  |
| sorting nexin 5 (predicted)                                                                | Snx5_predicted       | 2.19±0.51  |
| sorting nexin 6 (predicted)                                                                | Snx6_predicted       | 2.07±0.36  |
| sorting nexin 7                                                                            | Snx7                 | 0.76±0.03  |
| sorting nexin 8 (predicted)                                                                | Snx8_predicted       | 1.12±0.2   |
| sorting nexin family member 27                                                             | Snx27                | 1.84±0.47  |
| sorting nexin 24                                                                           | Snx24                | 0.43±0.2   |
| SP110 nuclear body protein                                                                 | Sp110                | 0.69±0.09  |
| SP140 nuclear body protein                                                                 | Sp140                | 2.93±0.7   |
| sparc/osteonectin, cwcv and kazal-like domains proteoglycan 2 (predicted)                  | Spock2_predicted     | 2.72±0.31  |
| spastic paraplegia 20, spartin (Troyer syndrome) homolog (human)                           | Spg20                | 0.55±0.19  |
| spastic paraplegia 21 homolog (human)                                                      | Spg21                | 2.96±0.26  |
| spastic paraplegia 7 homolog (human)                                                       | Spg7                 | 2.25±0.27  |
| spastin (predicted)                                                                        | Spast_predicted      | 1.41±0.01  |
| SPC24, NDC80 kinetochore complex component, homolog (S. cerevisiae)                        | Spc24                | 0.53±0.09  |
| SPC25, NDC80 kinetochore complex component, homolog (S. cerevisiae)                        | Spc25                | 0.33±0.03  |
| SPECC1-like                                                                                | Specc1               | 0.73±0.17  |
| speckle-type POZ protein                                                                   | Spop                 | 2.75±0.56  |
| spectrin beta 2                                                                            | Spnb2                | 13.93±1.31 |
| spectrin repeat containing, nuclear envelope 1                                             | Syne1                | 0.22±0.04  |
| speedy homolog A (Drosophila)                                                              | Spdya                | 0.24±0.02  |
| sperm associated antigen 5                                                                 | Spag5                | 0.21±0.02  |
| sperm associated antigen 7 (predicted)                                                     | Spag7_predicted      | 1.67±0.24  |
| sperm associated antigen 9 (predicted)                                                     | Spag9_predicted      | 4.34±0.2   |
| sperm autoantigenic protein 17                                                             | Spa17                | 2.44±0.73  |
| sperm specific antigen 2 (predicted)                                                       | Ssfa2_predicted      | 1.91±1.4   |
| spermatid perinuclear RNA binding protein                                                  | Strbp                | 1.99±0.24  |
| spermatogenesis associated 5 (predicted)                                                   | Spata5_predicted     | 0.27±0.01  |
| spermatogenesis associated 6                                                               | Spata6               | 0.95±0.04  |
| spermatogenesis associated 7                                                               | Spata7               | 1.38±0.31  |
| spermatogenesis associated, serine-rich 2 (predicted)                                      | Spats2_predicted     | 0.47±0.15  |
| spermidine synthase                                                                        | Srm                  | 1.18±0.53  |
| spermidine/spermine N1-acetyl transferase 1                                                | Sat1                 | 26.38±1.25 |
| spermidine/spermine N1-acetyl transferase 2 (predicted)                                    | Sat2_predicted       | 5.5±0.22   |
| spermine oxidase (predicted)                                                               | SmoX_predicted       | 0.34±0.09  |
| spermine synthase                                                                          | Sms                  | 1.08±0.11  |
| spermine synthase /// similar to spermine synthase                                         | LOC683008 /// LOC69C | 0.73±0.04  |
| S-phase kinase-associated protein 1A                                                       | Skp1a                | 22.84±1.86 |
| sphingomyelin phosphodiesterase 1, acid lysosomal                                          | Smpd1                | 11.04±0    |
| sphingomyelin phosphodiesterase 2, neutral                                                 | Smpd2                | 0.41±0.28  |
| sphingomyelin phosphodiesterase 4                                                          | Smpd4                | 0.73±0.2   |
| sphingomyelin phosphodiesterase, acid-like 3A                                              | Smpd3a               | 9.37±0.27  |
| sphingomyelin phosphodiesterase, acid-like 3B                                              | Smpd3b               | 1.13±0.39  |
| sphingosine kinase 1                                                                       | Sphk1                | 8.15±2.22  |
| sphingosine kinase 2                                                                       | Sphk2                | 2.95±0.17  |
| sphingosine kinase 2 /// similar to Sphingosine kinase 2 (SK 2) (SPK 2)                    | LOC367812 /// Sphk2  | 0.21±0.06  |

|                                                                                                            |                                    |            |
|------------------------------------------------------------------------------------------------------------|------------------------------------|------------|
| sphingosine phosphate lyase 1                                                                              | Sgpl1                              | 0.46±0.13  |
| sphingosine-1-phosphate phosphatase 1                                                                      | Sgpp1                              | 0.32±0.51  |
| spindle assembly 6 homolog (C. elegans) (predicted)                                                        | Sass6_predicted                    | 0.22±0.01  |
| spindlin 1 /// similar to spindlin                                                                         | LOC682571 /// Spin1                | 2.94±0.57  |
| spindlin family, member 2                                                                                  | Spin2                              | 0.71±0.05  |
| spire homolog 1 (Drosophila) (predicted)                                                                   | Spire1_predicted                   | 1.46±0.58  |
| splA/ryanodine receptor domain and SOCS box containing 1 (predicted)                                       | Spsb1_predicted                    | 0.21±0.11  |
| splA/ryanodine receptor domain and SOCS box containing 2                                                   | Spsb2                              | 0.39±0.23  |
| splA/ryanodine receptor domain and SOCS box containing 3 (predicted)                                       | Spsb3_predicted                    | 2.59±0.58  |
| splA/ryanodine receptor domain and SOCS box containing 4 (predicted)                                       | Spsb4_predicted                    | 2.61±1.32  |
| spleen tyrosine kinase                                                                                     | Syk                                | 0.71±0.39  |
| splicing factor 1                                                                                          | Sf1                                | 3.15±0.02  |
| splicing factor 3a, subunit 1 (predicted)                                                                  | Sf3a1_predicted                    | 0.77±0.06  |
| splicing factor 3a, subunit 2                                                                              | Sf3a2                              | 1.58±0.09  |
| splicing factor 3a, subunit 3                                                                              | Sf3a3                              | 1.36±0.07  |
| splicing factor 3b, subunit 1                                                                              | Sf3b1                              | 11.14±1.09 |
| splicing factor 3b, subunit 2 (predicted)                                                                  | Sf3b2_predicted                    | 3.01±0.23  |
| splicing factor 3b, subunit 3 (predicted)                                                                  | Sf3b3_predicted                    | 3.04±0.57  |
| splicing factor 3b, subunit 4                                                                              | Sf3b4                              | 3.83±0.14  |
| splicing factor 3b, subunit 5                                                                              | Sf3b5                              | 5.91±0.69  |
| splicing factor 4                                                                                          | Sf4                                | 0.61±0.06  |
| splicing factor proline/glutamine rich (polypyrimidine tract binding protein associated)                   | Sfpq                               | 1.72±0.33  |
| splicing factor YT521-B                                                                                    | Yt521                              | 5.83±0.2   |
| splicing factor, arginine/serine rich 9                                                                    | Sfrs9                              | 4.07±0.1   |
| splicing factor, arginine/serine-rich 10 (transformer 2 homolog, Drosophila)                               | Sfrs10                             | 10.47±2.56 |
| splicing factor, arginine/serine-rich 11                                                                   | Sfrs11                             | 6.34±0.82  |
| splicing factor, arginine/serine-rich 12                                                                   | Sfrs12                             | 0.64±0.2   |
| splicing factor, arginine/serine-rich 14 (predicted)                                                       | Sfrs14_predicted                   | 0.67±0.22  |
| splicing factor, arginine/serine-rich 15                                                                   | Sfrs15                             | 1.04±0.17  |
| Splicing factor, arginine/serine-rich 16                                                                   | Sfrs16                             | 0.54±0.05  |
| splicing factor, arginine/serine-rich 18                                                                   | Sfrs18                             | 2.08±0.23  |
| splicing factor, arginine/serine-rich 2 (SC-35)                                                            | Sfrs2                              | 7.1±0.81   |
| splicing factor, arginine/serine-rich 2, interacting protein                                               | Sfrs2ip                            | 0.66±0.16  |
| splicing factor, arginine/serine-rich 3 (SRp20) (predicted)                                                | Sfrs3_predicted                    | 14.44±1.43 |
| splicing factor, arginine/serine-rich 5                                                                    | Sfrs5                              | 4.69±1.15  |
| splicing factor, arginine/serine-rich 6                                                                    | Sfrs6                              | 6.64±0.18  |
| splicing factor, arginine/serine-rich 8                                                                    | Sfrs8                              | 0.61±0.17  |
| split hand/foot malformation (ectrodactyly) type 1                                                         | Shfm1                              | 10.75±0.22 |
| spondin 1                                                                                                  | Spon1                              | 24.59±0.29 |
| sprouty homolog 2 (Drosophila)                                                                             | Spry2                              | 4.3±0.92   |
| sprouty homolog 4 (Drosophila) (predicted)                                                                 | Spry4_predicted                    | 0.2±0.37   |
| Sprouty-related, EVH1 domain containing 2                                                                  | Spred2                             | 4.73±0.9   |
| SPRY domain containing 3                                                                                   | Spryd3                             | 1.27±0.07  |
| SPRY domain containing 4                                                                                   | Spryd4                             | 1.34±0.4   |
| squalene epoxidase                                                                                         | Sqle                               | 2.09±1.52  |
| squamous cell carcinoma antigen recognized by T-cells 1                                                    | Sart1                              | 2.31±0.51  |
| squamous cell carcinoma antigen recognized by T-cells 3 (predicted)                                        | Sart3_predicted                    | 1.04±0.28  |
| src family associated phosphoprotein 1                                                                     | Skap1                              | 2.28±0.33  |
| src family associated phosphoprotein 2                                                                     | Skap2                              | 6.69±2.24  |
| Src homolog 2 domain-containing transforming protein C1                                                    | Shc1                               | 1.75±0.11  |
| SREBF chaperone                                                                                            | Scap                               | 2.21±0.14  |
| SRR1 domain containing                                                                                     | Srrd                               | 0.58±0.01  |
| SR-related CTD-associated factor 1                                                                         | Scaf1                              | 0.41±0.22  |
| SRY-box containing gene 11                                                                                 | Sox11                              | 0.56±0.19  |
| SRY-box containing gene 4 (predicted)                                                                      | Sox4_predicted                     | 2.92±0.5   |
| SRY-box containing gene 6                                                                                  | Sox6                               | 0.42±0.2   |
| Ssu72 RNA polymerase II CTD phosphatase homolog (yeast)                                                    | Ssu72                              | 3.48±0.73  |
| ST3 beta-galactoside alpha-2,3-sialyltransferase 2                                                         | St3gal2                            | 0.75±0.23  |
| ST3 beta-galactoside alpha-2,3-sialyltransferase 3                                                         | St3gal3                            | 0.8±0.01   |
| ST3 beta-galactoside alpha-2,3-sialyltransferase 4                                                         | St3gal4                            | 0.23±0.07  |
| ST3 beta-galactoside alpha-2,3-sialyltransferase 5                                                         | St3gal5                            | 1.34±0.36  |
| ST3 beta-galactoside alpha-2,3-sialyltransferase 6                                                         | St3gal6                            | 5.68±0.83  |
| ST6 (alpha-N-acetylneuraminyl-2,3-beta-galactosyl-1,3)-N-acetylglucosaminide alpha-2,6-sialyltransferase 2 | St6galnac2                         | 1.57±1.77  |
| ST6 (alpha-N-acetylneuraminyl-2,3-beta-galactosyl-1,3)-N-acetylglucosaminide alpha-2,6-sialyltransferase 3 | St6galnac3                         | 1.15±0.32  |
| Stam binding protein                                                                                       | Stampb                             | 1.4±0.04   |
| stannin                                                                                                    | Snn                                | 5.49±1.14  |
| staphylococcal nuclease and tudor domain containing 1                                                      | Snd1                               | 2.88±0.22  |
| STARD3 N-terminal like                                                                                     | Stard3nl                           | 2.19±0.33  |
| StAR-related lipid transfer (START) domain containing 5                                                    | Stard5                             | 1.38±0.04  |
| START domain containing 10                                                                                 | Stard10                            | 6.48±0.58  |
| START domain containing 3                                                                                  | Stard3                             | 3.57±0.2   |
| START domain containing 7 (predicted)                                                                      | Stard7_predicted                   | 8.02±0.86  |
| START domain containing 8 (predicted)                                                                      | Stard8_predicted                   | 9.51±0.82  |
| stathmin 1                                                                                                 | Stmn1                              | 8.04±0.52  |
| staufen RNA binding protein homolog 1 (Drosophila)                                                         | Stau1                              | 3.58±0.34  |
| staufen, RNA binding protein, homolog 2 (Drosophila)                                                       | Stau2                              | 1.57±0.12  |
| STE20-like kinase (yeast)                                                                                  | Slk                                | 0.42±0     |
| STEAP family member 3                                                                                      | Steap3                             | 1.23±0.7   |
| stearoyl-Coenzyme A desaturase 2                                                                           | Scd2                               | 0.39±0.72  |
| stem-loop binding protein                                                                                  | Slbp                               | 1.31±1.18  |
| Sterile alpha motif domain containing 4 (predicted)                                                        | Samd4_predicted                    | 0.24±0.02  |
| sterile alpha motif domain containing 4B                                                                   | Samd4b                             | 0.57±0.17  |
| sterile alpha motif domain containing 8                                                                    | Samd8                              | 0.46±0.34  |
| steroid 5 alpha-reductase 3                                                                                | Srd5a3                             | 2.95±0.23  |
| steroid receptor RNA activator 1                                                                           | Sra1                               | 4.93±0.29  |
| sterol carrier protein 2 /// podocan (predicted)                                                           | Podn_predicted /// Scp; 30.27±1.13 |            |
| Sterol O-acyltransferase 1                                                                                 | Soat1                              | 1.7±0.06   |

|                                                                                                               |                     |            |
|---------------------------------------------------------------------------------------------------------------|---------------------|------------|
| sterol regulatory element binding factor 1                                                                    | Sreb1               | 1.07±0.93  |
| sterol regulatory element binding factor 2 (predicted)                                                        | Sreb2               | 3.89±0.4   |
| sterol-C4-methyl oxidase-like                                                                                 | Sc4mol              | 6.05±4.23  |
| sterol-C5-desaturase (fungal ERG3, delta-5-desaturase) homolog (S. cerevisiae)                                | Sc5d                | 2.45±1.01  |
| STIP1 homology and U-Box containing protein 1                                                                 | Stub1               | 4.1±0.49   |
| stomatin (Epb7.2)-like 2                                                                                      | Stoml2              | 3.01±0.54  |
| stomatin-like 1                                                                                               | Stoml1              | 0.4±0.36   |
| strawberry notch homolog 2 (Drosophila)                                                                       | Sbno2               | 0.43±0.1   |
| stress 70 protein chaperone, microsome-associated                                                             | Stch                | 1.18±0.27  |
| stress-associated endoplasmic reticulum protein 1                                                             | Serp1               | 13.12±1.72 |
| stress-induced phosphoprotein 1                                                                               | Stip1               | 6.02±2.36  |
| striatin, calmodulin binding protein                                                                          | Strn                | 1.27±0.52  |
| striatin, calmodulin binding protein 3                                                                        | Strn3               | 4.01±0.09  |
| striatin, calmodulin binding protein 4 (predicted)                                                            | Strn4_predicted     | 2.07±0.31  |
| stromal antigen 1 (predicted)                                                                                 | Stag1_predicted     | 1.34±0.07  |
| stromal antigen 2 (predicted)                                                                                 | Stag2_predicted     | 4.3±0.05   |
| stromal cell derived factor 2 (predicted)                                                                     | Sdf2_predicted      | 4.59±0.21  |
| stromal cell derived factor 4                                                                                 | Sdf4                | 6.88±0.09  |
| stromal cell-derived factor 2-like 1 (predicted)                                                              | Sdf2l1_predicted    | 0.81±0.13  |
| stromal interaction molecule 2 (predicted)                                                                    | Stim2_predicted     | 0.43±0.2   |
| stromal membrane-associated GTPase-activating protein 2                                                       | Smap2               | 0.75±0.04  |
| structural maintenance of chromosomes 3                                                                       | Smc3                | 6.26±1.62  |
| structural maintenance of chromosomes 1A                                                                      | Smc1a               | 1.22±0.07  |
| structural maintenance of chromosomes 2                                                                       | Smc2                | 0.77±0.44  |
| structural maintenance of chromosomes 4                                                                       | Smc4                | 0.23±0.06  |
| structural maintenance of chromosomes 5                                                                       | Smc5                | 1.02±0.17  |
| structure specific recognition protein 1                                                                      | Ssrp1               | 4.19±0.17  |
| STT3, subunit of the oligosaccharyltransferase complex, homolog A (S. cerevisiae)                             | Stt3a               | 1.45±0.21  |
| SUB1 homolog (S. cerevisiae)                                                                                  | Sub1                | 19.01±0.95 |
| succinate dehydrogenase complex, subunit A, flavoprotein (Fp)                                                 | Sdha                | 35.16±4.34 |
| succinate dehydrogenase complex, subunit B, iron sulfur (lp) (predicted)                                      | Sdjb_predicted      | 29.36±3.66 |
| succinate dehydrogenase complex, subunit C, integral membrane protein                                         | Sdhc                | 37.61±1.76 |
| succinate dehydrogenase complex, subunit D, integral membrane protein                                         | Sdhd                | 30.26±2.82 |
| succinate-CoA ligase, GDP-forming, alpha subunit                                                              | Suclg1              | 19.25±0.99 |
| succinate-Coenzyme A ligase, ADP-forming, beta subunit (predicted)                                            | Sucla2_predicted    | 15.91±2.47 |
| succinate-Coenzyme A ligase, GDP-forming, beta subunit                                                        | Suclg2              | 26.28±0.69 |
| sulfatase 2                                                                                                   | Sulf2               | 5.44±0.43  |
| sulfatase modifying factor 1 (predicted)                                                                      | Sumf1_predicted     | 1.01±0.33  |
| sulfatase modifying factor 2                                                                                  | Sumf2               | 0.76±0.02  |
| sulfite oxidase                                                                                               | Suox                | 3.45±0.34  |
| sulfotransferase family 1A, phenol-preferring, member 1                                                       | Sult1a1             | 2.76±4.49  |
| sulfotransferase family, cytosolic, 2B, member 1 (predicted)                                                  | Sult2b1_predicted   | 1.08±0     |
| SUMO                                                                                                          | LOC686286 /// RGD15 | 0.43±0.34  |
| SUMO/sentrin specific peptidase 2                                                                             | Senp2               | 0.46±0.03  |
| SUMO/sentrin specific peptidase 3                                                                             | Senp3               | 2.1±0.05   |
| SUMO/sentrin specific peptidase 6 (predicted)                                                                 | Senp6_predicted     | 2.88±0.09  |
| SUMO1 activating enzyme subunit 1                                                                             | Sae1                | 4.05±1.04  |
| SUMO1 activating enzyme subunit 2                                                                             | Sae2                | 4.37±0     |
| SUMO1/sentrin specific protease 7 (predicted)                                                                 | Senp7_predicted     | 1.33±0.36  |
| superkiller viralicidic activity 2-like 2 (S. cerevisiae)                                                     | Skiv2l2             | 2.78±0.04  |
| superoxide dismutase 1, soluble                                                                               | Sod1                | 17.81±1.75 |
| superoxide dismutase 2, mitochondrial                                                                         | Sod2                | 13.22±3.87 |
| suppression of tumorigenicity 13                                                                              | St13                | 5.98±0.05  |
| suppression of tumorigenicity 14 (colon carcinoma)                                                            | St14                | 10.44±1.33 |
| suppression of tumorigenicity 5 (predicted)                                                                   | St5_predicted       | 1.79±0.07  |
| suppression of tumorigenicity 7-like                                                                          | St7l                | 1.01±0.35  |
| suppressor of cytokine signaling 3                                                                            | Socs3               | 1.53±0.34  |
| suppressor of cytokine signaling 5                                                                            | Socs5               | 6.94±1.46  |
| suppressor of cytokine signaling 6 (predicted)                                                                | Socs6_predicted     | 2.95±0.72  |
| suppressor of cytokine signaling 7 (predicted)                                                                | Socs7_predicted     | 0.58±0.14  |
| suppressor of defective silencing 3 homolog (S. cerevisiae)                                                   | Suds3               | 4.38±0.13  |
| suppressor of IKK epsilon                                                                                     | Sike                | 0.69±0.11  |
| suppressor of Ty 16 homolog (S. cerevisiae) (predicted)                                                       | Supt16h_predicted   | 1.56±0.11  |
| suppressor of Ty 3 homolog (S. cerevisiae)                                                                    | Supt3h              | 0.65±0.08  |
| suppressor of Ty 4 homolog 1 (S. cerevisiae)                                                                  | Supt4h1             | 4.1±0.59   |
| suppressor of Ty 5 homolog (S. cerevisiae)                                                                    | Supt5h              | 4.47±1.27  |
| suppressor of Ty 6 homolog (S. cerevisiae)                                                                    | Supt6h              | 0.93±0.02  |
| suppressor of Ty 7 (S. cerevisiae)-like                                                                       | Supt7l              | 1.06±0.28  |
| suppressor of var1, 3-like 1 (S. cerevisiae)                                                                  | Supv3l1             | 3.56±0.92  |
| suppressor of variegation 3-9 homolog 1 (Drosophila) (predicted)                                              | Suv39h1_predicted   | 0.95±0.17  |
| suppressor of variegation 4-20 homolog 1 (Drosophila) (predicted)                                             | Suv420h1_predicted  | 1.85±0.07  |
| suppressor of variegation 4-20 homolog 2 (Drosophila) (predicted)                                             | Suv420h2_predicted  | 1.68±0.12  |
| surfeit 1                                                                                                     | Surf1               | 4.21±0.39  |
| surfeit 4                                                                                                     | Surf4               | 3.98±0.65  |
| surfeit gene 2                                                                                                | Surf2               | 1.09±0.4   |
| surfeit gene 6 (predicted)                                                                                    | Surf6_predicted     | 1.54±0.61  |
| survival motor neuron 1                                                                                       | Srn1                | 0.81±0.34  |
| survival motor neuron domain containing 1                                                                     | Srndc1              | 3.9±0.41   |
| survival of motor neuron protein interacting protein 1                                                        | Sip1                | 1.33±0.23  |
| sushi, nidogen and EGF-like domains 1                                                                         | Sned1               | 1.3±1.34   |
| SWA-70 protein                                                                                                | Swap70              | 0.71±0.26  |
| Swi/SNF related matrix associated, actin dependent regulator of chromatin, subfamily a-like 1 (predicted)     | Smarcal1_predicted  | 0.54±0.16  |
| Swi/SNF related, matrix associated, actin dependent regulator of chromatin, subfamily a, member 2             | Smarca2             | 0.53±0.13  |
| Swi/SNF related, matrix associated, actin dependent regulator of chromatin, subfamily a, member 4             | Smarca4             | 3.56±0.27  |
| Swi/SNF related, matrix associated, actin dependent regulator of chromatin, subfamily a, member 5 (predicted) | Smarca5_predicted   | 1.68±0.59  |
| Swi/SNF related, matrix associated, actin dependent regulator of chromatin, subfamily b, member 1             | Smarcb1             | 2.01±0.02  |
| Swi/SNF related, matrix associated, actin dependent regulator of chromatin, subfamily c, member 1 (predicted) | Smarcc1_predicted   | 0.99±0.08  |

|                                                                                                                              |                     |             |
|------------------------------------------------------------------------------------------------------------------------------|---------------------|-------------|
| SWI/SNF related, matrix associated, actin dependent regulator of chromatin, subfamily d, member 1 (predicted)                | Smarcd1_predicted   | 0.66±0.05   |
| SWI/SNF related, matrix associated, actin dependent regulator of chromatin, subfamily d, member 2                            | Smarcd2             | 1.31±0.11   |
| SWI/SNF related, matrix associated, actin dependent regulator of chromatin, subfamily d, member 3                            | Smarcd3             | 6.25±1.64   |
| SWI/SNF related, matrix associated, actin dependent regulator of chromatin, subfamily e, member 1                            | Smarce1             | 8.79±0.73   |
| SWI/SNF-related, matrix-associated actin-dependent regulator of chromatin, subfamily a, containing DEAD/H box 1; (predicted) | Smarcad1_predicted  | 0.51±0.1    |
| SYF2 homolog, RNA splicing factor ( <i>S. cerevisiae</i> )                                                                   | Syf2                | 3.94±0.05   |
| symplekin                                                                                                                    | Sympk               | 0.56±0.06   |
| synapse associated protein 1                                                                                                 | Syap1               | 2.01±1.06   |
| synapse defective 1, Rho GTPase, homolog 1 ( <i>C. elegans</i> ) (predicted)                                                 | Syde1_predicted     | 0.6±0.02    |
| synaptic vesicle glycoprotein 2a                                                                                             | Sv2a                | 5.11±1.35   |
| synaptic vesicle glycoprotein 2b                                                                                             | Sv2b                | 25.32±47.08 |
| synaptogyrin 1                                                                                                               | Syng1               | 2.82±0.51   |
| synaptogyrin 2                                                                                                               | Syng2               | 2.99±0.01   |
| synaptojanin 1                                                                                                               | Synj1               | 0.72±0.02   |
| synaptojanin 2 binding protein                                                                                               | Synj2bp             | 2.51±0.06   |
| Synaptophysin-like protein                                                                                                   | Sypl                | 12.33±2.59  |
| synaptopodin 2                                                                                                               | Synpo2              | 0.5±0.19    |
| synaptosomal-associated protein 23                                                                                           | Snap23              | 2.24±0.49   |
| synaptosomal-associated protein 29                                                                                           | Snap29              | 1.19±0.89   |
| Synaptotagmin binding, cytoplasmic RNA interacting protein                                                                   | Syncrip             | 1.59±0.48   |
| Synaptotagmin III                                                                                                            | Syt3                | 0.81±0.29   |
| synaptotagmin XVII                                                                                                           | Syt17               | 4.16±0.32   |
| synaptotagmin-like 2 (predicted)                                                                                             | Sytl2_predicted     | 15.5±2.36   |
| syndecan 1                                                                                                                   | Sdc1                | 0.64±0.25   |
| syndecan 2                                                                                                                   | Sdc2                | 4.65±2.56   |
| syndecan 3                                                                                                                   | Sdc3                | 1.19±0.3    |
| syndecan 4                                                                                                                   | Sdc4                | 26.85±5.75  |
| syndecan binding protein                                                                                                     | Sdcbp               | 24.28±5.17  |
| synovial apoptosis inhibitor 1, synoviolin                                                                                   | Syvn1               | 0.99±0.03   |
| synovial sarcoma translocation, Chromosome 18                                                                                | Ss18                | 2.99±0.11   |
| synovial sarcoma, X breakpoint 2 interacting protein                                                                         | Ssx2ip              | 1.39±0.41   |
| syntaxin 12                                                                                                                  | Stx12               | 1.35±0.31   |
| syntaxin 16 (predicted)                                                                                                      | Stx16_predicted     | 2.62±0.51   |
| syntaxin 17                                                                                                                  | Stx17               | 0.51±0.46   |
| syntaxin 18                                                                                                                  | Stx18               | 1.9±0.8     |
| syntaxin 4A (placental)                                                                                                      | Stx4a               | 3.46±0.33   |
| syntaxin 5a                                                                                                                  | Stx5a               | 1.82±0.06   |
| syntaxin 6                                                                                                                   | Stx6                | 1.76±0.32   |
| syntaxin 7                                                                                                                   | Stx7                | 19.33±0.09  |
| syntaxin 8                                                                                                                   | Stx8                | 1.46±0.1    |
| syntaxin binding protein 1                                                                                                   | Stxbp1              | 0.82±0.53   |
| syntaxin binding protein 2                                                                                                   | Stxbp2              | 1.49±0.54   |
| syntaxin binding protein 3                                                                                                   | Stxbp3              | 2.65±0.35   |
| syntaxin binding protein 5 (tomosyn)                                                                                         | Stxbp5              | 0.28±0      |
| syntrophin, acidic 1                                                                                                         | Snta1               | 0.99±0.16   |
| synuclein, gamma                                                                                                             | Sncg                | 0.34±1.47   |
| TAF1 RNA polymerase II, TATA box binding protein (TBP)-associated factor (predicted)                                         | Taf1_predicted      | 0.69±0.07   |
| TAF11 RNA polymerase II, TATA box binding protein (TBP)-associated factor                                                    | Taf11               | 1.2±0.4     |
| TAF13 RNA polymerase II, TATA box binding protein (TBP)-associated factor (predicted)                                        | Taf13_predicted     | 4.04±1.39   |
| TAF15 RNA polymerase II, TATA box binding protein (TBP)-associated factor (predicted)                                        | LOC364872 / LOC6880 | 0.22±0.74   |
| TAF2 RNA polymerase II, TATA box binding protein (TBP)-associated factor                                                     | Taf2                | 1.42±0.36   |
| TAF5 RNA polymerase II, TATA box binding protein (TBP)-associated factor (predicted)                                         | Taf5_predicted      | 0.36±0.03   |
| TAF5-like RNA polymerase II, p300/CBP-associated factor (PCAF)-associated factor                                             | Taf5l               | 0.6±0.32    |
| TAF6 RNA polymerase II, TATA box binding protein (TBP)-associated factor                                                     | Taf6                | 2.02±0      |
| TAF6-like RNA polymerase II, p300/CBP-associated factor (PCAF)-associated factor (predicted)                                 | Taf6l_predicted     | 0.44±0      |
| TAF8 RNA polymerase II, TATA box binding protein (TBP)-associated factor                                                     | Taf8                | 0.61±0.1    |
| TAF9 RNA polymerase II, TATA box binding protein (TBP)-associated factor                                                     | Taf9                | 4.45±1.18   |
| TAF9 RNA polymerase II, TATA box binding protein (TBP)-associated factor pseudogene                                          | Taf9 /// Taf9_ps    | 1.08±0.43   |
| tafazzin                                                                                                                     | Taz                 | 1.44±0.23   |
| talin 1                                                                                                                      | Tln1                | 1.75±1.36   |
| TANK-binding kinase 1                                                                                                        | Tbk1                | 1.56±0.4    |
| tankyrase 1 binding protein 1 (predicted)                                                                                    | Tnks1bp1_predicted  | 1.03±0.06   |
| tankyrase, TRF1-interacting ankyrin-related ADP-ribose polymerase 2 (predicted)                                              | Tnks2_predicted     | 3.39±0.07   |
| TAO kinase 1                                                                                                                 | Taok1               | 0.97±0.02   |
| TAP binding protein                                                                                                          | Tapbp               | 0.23±0.58   |
| TAR (HIV) RNA binding protein 2                                                                                              | Tarbp2              | 2.19±0.41   |
| TAR DNA binding protein                                                                                                      | Tardbp              | 6.78±1.07   |
| target of EGR1, member 1 (nuclear) (predicted)                                                                               | Toe1_predicted      | 0.34±0.15   |
| target of myb1 homolog (chicken)                                                                                             | Tom1                | 2.8±0.59    |
| Target of myb1-like 2 (chicken) (predicted)                                                                                  | Tom1l2_predicted    | 2.56±0.45   |
| taspace, threonine aspartase 1 (predicted)                                                                                   | Tasp1_predicted     | 0.27±0.14   |
| Taste receptor, type 1, member 2                                                                                             | Tas1r2              | 0.82±0.47   |
| TATA box binding protein                                                                                                     | Tbp                 | 1.1±0.12    |
| TATA box binding protein (Tbp)-associated factor, RNA polymerase I, C                                                        | Taf1c               | 0.24±0.26   |
| TATA box binding protein-like 1                                                                                              | Tbpl1               | 1.8±0.98    |
| TatD DNase domain containing 2                                                                                               | Tatdn2              | 2.96±0.13   |
| Tax1 (human T-cell leukemia virus type I) binding protein 1                                                                  | Tax1bp1             | 11.77±1.68  |
| Tax1 (human T-cell leukemia virus type I) binding protein 3                                                                  | Tax1bp3             | 5.4±0.12    |
| TBC1 domain family, member 10a                                                                                               | Tbc1d10a            | 1.45±0.14   |
| TBC1 domain family, member 14                                                                                                | Tbc1d14             | 8.9±1.37    |
| TBC1 domain family, member 15                                                                                                | Tbc1d15             | 0.58±0.42   |
| TBC1 domain family, member 17 (predicted)                                                                                    | Tbc1d17_predicted   | 0.95±0.34   |
| TBC1 domain family, member 2 (predicted)                                                                                     | Tbc1d2_predicted    | 0.26±0.05   |
| TBC1 domain family, member 22a (predicted)                                                                                   | Tbc1d22a_predicted  | 0.8±0.08    |
| TBC1 domain family, member 22B                                                                                               | Tbc1d22b            | 0.97±0.02   |
| TBC1 domain family, member 23 (predicted)                                                                                    | Tbc1d23_predicted   | 3.42±0.23   |
| TBC1 domain family, member 2B                                                                                                | Tbc1d2b             | 0.68±0.28   |

|                                                                              |                   |            |
|------------------------------------------------------------------------------|-------------------|------------|
| TBC1 domain family, member 7 (predicted)                                     | Tbc1d7_predicted  | 0.78±0.13  |
| TBC1 domain family, member 9B                                                | Tbc1d9b           | 2.97±0.22  |
| TBCC domain containing 1                                                     | Tbccd1            | 0.4±0.03   |
| T-box 19 (predicted)                                                         | Tbx19_predicted   | 0.42±0.15  |
| TCDD-inducible poly(ADP-ribose) polymerase (predicted)                       | Tiparp_predicted  | 0.45±0.05  |
| T-cell leukemia translocation altered gene                                   | Tcta              | 2.88±0.02  |
| T-cell lymphoma invasion and metastasis 1                                    | Tiam1             | 0.49±0.3   |
| T-cell, immune regulator 1, ATPase, H+ transporting, lysosomal V0 protein A3 | Tcirg1            | 0.76±0.25  |
| TCF3 (E2A) fusion partner                                                    | Tfpt              | 0.51±0.04  |
| t-complex 11 (mouse) like 2                                                  | Tcp11l2           | 0.3±0.8    |
| t-complex protein 1                                                          | Tcp1              | 11.82±1.18 |
| Tctex1 domain containing 2                                                   | Tctex1d2          | 0.77±0.17  |
| TEA domain family member 3                                                   | Tead3             | 0.74±0.2   |
| teashirt zinc finger family member 1                                         | Tshz1             | 2.16±0.11  |
| Tectonic 2                                                                   | Tect2             | 0.7±0      |
| tectonic family member 3                                                     | Tctn3             | 0.38±0.15  |
| tektin 1                                                                     | Tekt1             | 0.48±0.11  |
| TEL2, telomere maintenance 2, homolog (S. cerevisiae)                        | Telo2             | 0.83±0.35  |
| telomerase associated protein 1                                              | Tep1              | 1.7±0      |
| telomeric repeat binding factor 2, interacting protein                       | Terf2ip           | 2.04±0.34  |
| tensin 1                                                                     | Tns1              | 14.22±0.37 |
| tensin 4                                                                     | Tns4              | 0.2±0.02   |
| tensin like C1 domain containing phosphatase (predicted)                     | Tenc1_predicted   | 1.05±0.41  |
| TERF1 (TRF1)-interacting nuclear factor 2                                    | Tinf2             | 0.21±0.01  |
| terminal uridylyl transferase 1, U6 snRNA-specific                           | Tut1              | 0.55±0.25  |
| tescalcin                                                                    | Tesc              | 8.13±2.39  |
| testis derived transcript                                                    | Tes               | 4.42±1.03  |
| testis enhanced gene transcript                                              | Tegt              | 28.31±5.03 |
| testis expressed gene 10 (predicted)                                         | Tex10_predicted   | 1.13±0.15  |
| testis expressed gene 14 (predicted)                                         | Tex14_predicted   | 4.23±0.48  |
| testis expressed gene 15 (predicted)                                         | Tex15_predicted   | 0.91±0.37  |
| testis expressed gene 2                                                      | Tex2              | 2.99±0.14  |
| testis expressed gene 261                                                    | Tex261            | 3.75±0.72  |
| testis expressed gene 264                                                    | Tex264            | 4.15±1.18  |
| testis specific protein kinase 1                                             | Testk1            | 0.83±0.22  |
| testis-specific kinase 2                                                     | Testk2            | 0.58±0.02  |
| testis-specific protein, Y-encoded-like 1                                    | Tspyl1            | 2.76±0.36  |
| tetraspanin 12                                                               | Tspan12           | 16.11±1.8  |
| tetraspanin 14 (predicted)                                                   | Tspan14_predicted | 2.33±0.56  |
| tetraspanin 3                                                                | Tspan3            | 13.12±1.51 |
| tetraspanin 31                                                               | Tspan31           | 2.94±0.47  |
| tetraspanin 33                                                               | Tspan33           | 4.86±0.28  |
| tetraspanin 4                                                                | Tspan4            | 1.2±0.42   |
| tetraspanin 6                                                                | Tspan6            | 2.79±0.92  |
| tetraspanin 7                                                                | Tspan7            | 8.8±1.5    |
| tetraspanin 8                                                                | Tspan8            | 23.6±3.48  |
| tetraspanin 9 (predicted)                                                    | Tspan9_predicted  | 1.17±0.07  |
| tetratricopeptide repeat domain 1                                            | Ttc1              | 3.21±0.05  |
| tetratricopeptide repeat domain 12                                           | Ttc12             | 0.49±0.06  |
| tetratricopeptide repeat domain 13                                           | Ttc13             | 0.75±0.23  |
| tetratricopeptide repeat domain 15                                           | Ttc15             | 2.02±0.57  |
| tetratricopeptide repeat domain 17                                           | Ttc17             | 1.31±0.02  |
| tetratricopeptide repeat domain 19                                           | Ttc19             | 1.19±0.12  |
| tetratricopeptide repeat domain 21B                                          | Ttc21b            | 0.95±0.35  |
| tetratricopeptide repeat domain 23                                           | Ttc23             | 1.08±0.14  |
| tetratricopeptide repeat domain 27                                           | Ttc27             | 1.23±0.42  |
| tetratricopeptide repeat domain 3 (predicted)                                | Ttc3_predicted    | 4.54±0.08  |
| tetratricopeptide repeat domain 33                                           | Ttc33             | 1.2±0.34   |
| tetratricopeptide repeat domain 35                                           | Ttc35             | 6.57±0.7   |
| tetratricopeptide repeat domain 5                                            | Ttc5              | 1.45±0.58  |
| tetratricopeptide repeat domain 7                                            | Ttc7              | 3.7±0.32   |
| tetratricopeptide repeat domain 7B (predicted)                               | Ttc7b_predicted   | 1.28±0.18  |
| Tetratricopeptide repeat domain 8 (predicted)                                | Ttc8_predicted    | 0.68±0.29  |
| Tetratricopeptide repeat domain 9C                                           | Ttc9c             | 2.96±0.62  |
| TG interacting factor 1                                                      | Tgif1             | 1.3±1.2    |
| THAP domain containing 11 (predicted)                                        | Thap11_predicted  | 0.97±0.01  |
| THAP domain containing 4                                                     | Thap4             | 25.29±6.11 |
| THAP domain containing 7                                                     | Thap7             | 0.61±0.04  |
| THAP domain containing, apoptosis associated protein 3 (predicted)           | Thap3_predicted   | 1.76±0.35  |
| thiamine triphosphatase                                                      | Thtpa             | 4.43±0.25  |
| thioesterase superfamily member 2 (predicted)                                | Them2_predicted   | 8.63±2.07  |
| thioesterase superfamily member 4                                            | Them4             | 2.15±0.35  |
| thioredoxin 1                                                                | Txn1              | 25.5±1.47  |
| thioredoxin 2                                                                | Txn2              | 11.77±1.04 |
| thioredoxin domain containing 1                                              | Txndc1            | 2.51±0.21  |
| thioredoxin domain containing 11 (predicted)                                 | Txndc11_predicted | 0.51±0.06  |
| thioredoxin domain containing 12 (endoplasmic reticulum)                     | Txndc12           | 2.72±0.15  |
| thioredoxin domain containing 13                                             | Txndc13           | 4.03±0.38  |
| thioredoxin domain containing 15                                             | Txndc15           | 5.59±0.92  |
| thioredoxin domain containing 17                                             | Txndc17           | 5.49±0.05  |
| thioredoxin domain containing 4 (endoplasmic reticulum)                      | Txndc4            | 3.23±0.2   |
| Thioredoxin domain containing 9                                              | Txndc9            | 0.67±0.26  |
| thioredoxin interacting protein                                              | Txnip             | 45.03±7.89 |
| thioredoxin reductase 1                                                      | Txnd1             | 1.38±0.74  |
| thioredoxin reductase 2                                                      | Txnd2             | 1.51±0.3   |
| thioredoxin-like 1                                                           | Txn1l             | 9.39±0.28  |
| thioredoxin-like 4B                                                          | Txn14b            | 0.74±0.05  |



|                                                                                                                                      |                         |            |
|--------------------------------------------------------------------------------------------------------------------------------------|-------------------------|------------|
| Thioredoxin-related transmembrane protein 2                                                                                          | Tmx2                    | 10.2±2.13  |
| thiosulfate sulfurtransferase, mitochondrial                                                                                         | Tst                     | 1.29±1.17  |
| THO complex 1                                                                                                                        | Thoc1                   | 1.54±0.64  |
| THO complex 2 (predicted)                                                                                                            | Thoc2_predicted         | 1.31±0.1   |
| THO complex 3 (predicted)                                                                                                            | Thoc3_predicted         | 0.92±0.12  |
| THO complex 5                                                                                                                        | Thoc5                   | 2.03±0.42  |
| THO complex 6 homolog (Drosophila)                                                                                                   | Thoc6                   | 0.88±0.04  |
| THO complex 7 homolog (Drosophila)                                                                                                   | Thoc7                   | 5.46±3.15  |
| three prime histone mRNA exonuclease 1                                                                                               | Thex1                   | 0.76±0.18  |
| three prime repair exonuclease 1                                                                                                     | Trex1                   | 0.8±0.07   |
| threonine synthase-like 2 (bacterial)                                                                                                | Thnsl2                  | 1.76±1.59  |
| threonyl-tRNA synthetase                                                                                                             | Tars                    | 1.54±0.3   |
| threonyl-tRNA synthetase 2, mitochondrial (putative)                                                                                 | Tars2                   | 1.71±0.16  |
| THUMP domain containing 1                                                                                                            | Thumpd1                 | 2.17±0.1   |
| THUMP domain containing 2                                                                                                            | Thumpd2                 | 0.23±0.1   |
| THUMP domain containing 3                                                                                                            | Thumpd3                 | 2.26±0.18  |
| thymidine kinase 1                                                                                                                   | Tk1                     | 1.19±0.1   |
| thymidine kinase 2, mitochondrial (predicted)                                                                                        | Tk2_predicted           | 0.58±0.19  |
| thymidylate synthase                                                                                                                 | Tyms                    | 0.31±0.03  |
| thymine-DNA glycosylase                                                                                                              | Tdg                     | 1.17±0.42  |
| thymocyte nuclear protein 1                                                                                                          | Thyn1                   | 1.55±0.49  |
| Thymoma viral proto-oncogene 1                                                                                                       | Akt1                    | 5.37±0.05  |
| Thymoma viral proto-oncogene 2                                                                                                       | Akt2                    | 1.95±0.18  |
| thymopietin                                                                                                                          | Tmpo                    | 3.33±0.02  |
| thyroid adenoma associated                                                                                                           | Thada                   | 0.49±0.62  |
| thyroid hormone receptor alpha                                                                                                       | Thra                    | 2.13±0.46  |
| thyroid hormone receptor associated protein 3                                                                                        | Thrap3                  | 3.15±0.3   |
| thyroid hormone receptor beta                                                                                                        | Thrb                    | 0.9±0.02   |
| thyroid hormone receptor interactor 10                                                                                               | Trip10                  | 1.29±0.45  |
| thyroid hormone receptor interactor 11                                                                                               | Trip11                  | 0.2±0.01   |
| thyroid hormone receptor interactor 12                                                                                               | Trip12                  | 4.88±0.69  |
| thyroid hormone responsive protein                                                                                                   | Thrsp                   | 0.38±0.08  |
| Tia 1 cytotoxic granule-associated RNA binding protein-like 1                                                                        | Tial1                   | 2.13±0.14  |
| tight junction associated protein 1 (predicted)                                                                                      | Tjap1_predicted         | 0.29±0.12  |
| tight junction protein 1 (predicted)                                                                                                 | Tjp1_predicted          | 3.72±1.27  |
| tight junction protein 2                                                                                                             | Tjp2                    | 0.84±0.11  |
| timeless homolog (Drosophila)                                                                                                        | Timeless                | 0.46±0.05  |
| TIP41, TOR signalling pathway regulator-like (S. cerevisiae) (predicted) /// similar to TIP41, TOR signalling pathway regulator-like | LOC686733 /// Tipr1_pr  | 1.17±0.7   |
| tissue factor pathway inhibitor                                                                                                      | Tfpi                    | 1.54±0.18  |
| Tissue inhibitor of metalloproteinase 3 (Sorsby fundus dystrophy, pseudoinflammatory)                                                | Timp3                   | 2.72±10.65 |
| tissue inhibitor of metalloproteinase 4                                                                                              | Timp4                   | 0.35±0.1   |
| tissue specific transplantation antigen P35B (predicted)                                                                             | Tsta3_predicted         | 1.97±0.11  |
| TLC domain containing 1                                                                                                              | Tlcd1                   | 3.75±0.66  |
| TM2 domain containing 1 (predicted)                                                                                                  | Tm2d1_predicted         | 4.71±0.86  |
| TM2 domain containing 2                                                                                                              | Tm2d2                   | 5.48±1.51  |
| TM2 domain containing 3 (predicted)                                                                                                  | Tm2d3_predicted         | 4.25±0.75  |
| TM2 domain containing 3 (predicted) /// threonyl-tRNA synthetase-like 2                                                              | Tarsl2 /// Tm2d3_predic | 0.5±0.06   |
| TMEM9 domain family, member B (predicted)                                                                                            | Tmem9b_predicted        | 4.18±0.42  |
| Tnf receptor associated factor 4 (predicted)                                                                                         | Traf4_predicted         | 3.93±0.33  |
| Tnf receptor-associated factor 2 (predicted)                                                                                         | Traf2_predicted         | 0.4±0.06   |
| Tnf receptor-associated factor 3 (predicted)                                                                                         | Traf3_predicted         | 0.55±0.04  |
| Tnf receptor-associated factor 6 (predicted)                                                                                         | Traf6_predicted         | 1.17±0.31  |
| Tnf receptor-associated factor 7 (predicted)                                                                                         | Traf7_predicted         | 1.28±0.17  |
| TNF receptor-associated protein 1                                                                                                    | Trap1                   | 8.9±2.17   |
| TNFAIP3 interacting protein 1 (predicted)                                                                                            | Tnip1_predicted         | 2.19±0.01  |
| TNFAIP3 interacting protein 2                                                                                                        | Tnip2                   | 0.5±0.28   |
| TNFRSF1A-associated via death domain                                                                                                 | Tradd                   | 1.08±0.04  |
| TNNI3 interacting kinase                                                                                                             | Tnni3k                  | 0.36±0.12  |
| toll interacting protein (predicted)                                                                                                 | Tollip_predicted        | 1.23±0.27  |
| topoisomerase (DNA) 2 alpha                                                                                                          | Top2a                   | 1.25±0.53  |
| topoisomerase (DNA) I                                                                                                                | Top1                    | 4.22±0.61  |
| topoisomerase (DNA) II beta binding protein                                                                                          | Topbp1                  | 0.54±0.17  |
| topoisomerase (DNA) III beta (predicted)                                                                                             | Top3b_predicted         | 1.57±0.52  |
| topoisomerase I binding, arginine/serine-rich (predicted)                                                                            | Topors_predicted        | 2.83±0.63  |
| torsin A interacting protein 1                                                                                                       | Tor1aip1                | 3.15±0.58  |
| torsin A interacting protein 2                                                                                                       | Tor1aip2                | 0.23±0     |
| torsin family 1, member B                                                                                                            | Tor1b                   | 0.41±0.18  |
| torsin family 2, member A                                                                                                            | Tor2a                   | 1.52±0.03  |
| torsin family 3, member A                                                                                                            | Tor3a                   | 0.31±0.07  |
| tousled-like kinase 1 (predicted)                                                                                                    | Tlk1_predicted          | 3.83±0.49  |
| tousled-like kinase 2 (Arabidopsis) (predicted)                                                                                      | Tlk2_predicted          | 1.58±0.28  |
| TOX high mobility group box family member 4                                                                                          | Tox4                    | 1.69±0.11  |
| TP53 regulated inhibitor of apoptosis 1                                                                                              | Triap1                  | 3.75±0.09  |
| TP53 regulating kinase (predicted)                                                                                                   | Trp53rk_predicted       | 0.5±0.29   |
| TP53rk binding protein                                                                                                               | Tprkb                   | 1.69±0.36  |
| TraB domain containing                                                                                                               | Trabd                   | 0.99±0.3   |
| Traf and Tnf receptor associated protein                                                                                             | Trap                    | 1.46±0.05  |
| TRAF family member-associated NF-kappa B activator                                                                                   | Tank                    | 0.67±0.11  |
| TRAF type zinc finger domain containing 1                                                                                            | Trafd1                  | 1.08±0.33  |
| Traf3 interacting protein 2                                                                                                          | Traf3ip2                | 0.54±0     |
| TRAF4 associated factor 1                                                                                                            | Traf4af1                | 0.6±0.14   |
| trafficking protein particle complex 1                                                                                               | Trappc1                 | 4.3±0.49   |
| trafficking protein particle complex 2                                                                                               | Trappc2                 | 1.71±0.59  |
| trafficking protein particle complex 2-like                                                                                          | Trappc2l                | 3.22±0.12  |
| trafficking protein particle complex 3                                                                                               | Trappc3                 | 4.9±0.72   |
| trafficking protein particle complex 4                                                                                               | Trappc4                 | 1.9±0.05   |
| trafficking protein particle complex 5                                                                                               | Trappc5                 | 6.98±0.09  |

|                                                                                                |                       |            |
|------------------------------------------------------------------------------------------------|-----------------------|------------|
| trafficking protein particle complex 6A /// similar to trafficking protein particle complex 6A | LOC686599 /// Trappcf | 3.72±0.38  |
| trafficking protein particle complex 6B (predicted)                                            | Trappc6b_predicted    | 3.34±0.56  |
| trafficking protein, kinesin binding 2                                                         | Trak2                 | 3.88±0.13  |
| trans-acting transcription factor 1                                                            | Sp1                   | 4.71±0.62  |
| transaldolase 1                                                                                | Taldo1                | 9.63±0.79  |
| transcobalamin 2                                                                               | Tcn2                  | 13.48±3.51 |
| transcription elongation factor A (SII) 1                                                      | Tcea1                 | 7.38±0.12  |
| transcription elongation factor A (SII)-like 1                                                 | Tceal1                | 0.96±0.09  |
| transcription elongation factor A (SII)-like 8                                                 | Tceal8                | 2.67±0.12  |
| transcription elongation factor B (SIII), polypeptide 1                                        | Tceb1                 | 8.1±0.95   |
| transcription elongation factor B (SIII), polypeptide 2                                        | Tceb2                 | 16.63±3.76 |
| transcription elongation factor B (SIII), polypeptide 3                                        | Tceb3                 | 1.66±0.49  |
| transcription elongation regulator 1 (CA150) (predicted)                                       | Tcerq1_predicted      | 2.17±0.36  |
| transcription factor 19                                                                        | Tcf19                 | 3.15±0.68  |
| transcription factor 20                                                                        | Tcf20                 | 0.33±0.11  |
| transcription factor 25 (basic helix-loop-helix)                                               | Tcf25                 | 5.88±0.98  |
| transcription factor 4                                                                         | Tcf4                  | 0.29±0.61  |
| transcription factor A, mitochondrial                                                          | Tfam                  | 4.64±0.52  |
| transcription factor AP-2 beta (predicted)                                                     | Tcfap2b_predicted     | 5.93±1.74  |
| transcription factor AP4 (predicted)                                                           | Tcfap4_predicted      | 0.43±0.27  |
| transcription factor B1, mitochondrial                                                         | Tfb1m                 | 0.52±0.01  |
| transcription factor B2, mitochondrial                                                         | Tfb2m                 | 2.37±0.01  |
| transcription factor CP2 (predicted)                                                           | Tcfcp2_predicted      | 0.39±0.12  |
| transcription factor CP2-like 1 (predicted)                                                    | Tcfcp2l1_predicted    | 2.98±0.55  |
| transcription factor CP2-like 2                                                                | Tcfcp2l2              | 1.23±0.67  |
| transcription factor Dp-2 (E2F dimerization partner 2)                                         | Tfdp2                 | 0.37±0.29  |
| transcription factor EB                                                                        | Tcfeb                 | 1.23±0.05  |
| transcriptional adaptor 1 (HF11 homolog, yeast) like                                           | Tada11                | 1.24±0.35  |
| transcriptional adaptor 3 (NGG1 homolog, yeast)-like                                           | Tada3l                | 0.31±0.23  |
| transcriptional regulator, SIN3A (yeast) (predicted)                                           | Sin3a_predicted       | 1.3±0.36   |
| transducer of ERBB2, 2                                                                         | Tob2                  | 5.69±0.54  |
| transducer of ErbB-2.1                                                                         | Tob1                  | 17.01±7.24 |
| transducin (beta)-like 1 X-linked (predicted)                                                  | Tbl1x_predicted       | 1.77±0.66  |
| transducin (beta)-like 1X-linked receptor 1 (predicted)                                        | Tbl1xr1_predicted     | 2.81±0.02  |
| transducin (beta)-like 3                                                                       | Tbl3                  | 0.69±0.29  |
| transducin-like enhancer of split 1, homolog of Drosophila E(spl) (predicted)                  | Tle1_predicted        | 0.46±0.22  |
| transducin-like enhancer of split 3, homolog of Drosophila E(spl)                              | Tle3                  | 0.62±0.4   |
| transducin-like enhancer of split 4, homolog of Drosophila E(spl)                              | Tle4                  | 0.4±0.08   |
| transferrin receptor                                                                           | Tfrc                  | 20.51±6    |
| transformation related protein 53                                                              | Trp53                 | 1.36±0.17  |
| transformation related protein 53 binding protein 1 (predicted)                                | Trp53bp1_predicted    | 1.41±0.11  |
| transformation related protein 53 inducible protein 13                                         | Trp53i13              | 0.58±0.11  |
| transformation/transcription domain-associated protein (predicted)                             | Trrap_predicted       | 1.5±0.38   |
| transformed mouse 3T3 cell double minute 1                                                     | Mdm1                  | 0.92±0.21  |
| transformed mouse 3T3 cell double minute 2 homolog (mouse) (predicted)                         | Mdm2_predicted        | 1.76±0.02  |
| transformer 2 alpha homolog (Drosophila)                                                       | Tra2a                 | 2.32±0.05  |
| transforming growth factor beta 1 induced transcript 1                                         | Tqfb1i1               | 1.07±0.48  |
| transforming growth factor beta regulated gene 1                                               | Tbrg1                 | 6.36±0.39  |
| transforming growth factor beta regulated gene 4                                               | Tbrg4                 | 2.25±0.47  |
| transforming growth factor, beta receptor 1                                                    | Tqfbr1                | 4.71±1.37  |
| transforming growth factor, beta receptor associated protein 1 (predicted)                     | Tgfbrap1_predicted    | 0.58±0.06  |
| transforming, acidic coiled-coil containing protein 1                                          | Tacc1                 | 6.12±1.61  |
| transglutaminase 2, C polypeptide                                                              | Tgm2                  | 0.65±0.2   |
| trans-golgi network protein                                                                    | Tgoln1                | 7.2±1.46   |
| transient receptor potential cation channel, subfamily C, member 1                             | Trpc1                 | 0.65±0.19  |
| transient receptor potential cation channel, subfamily C, member 2                             | Trpc2                 | 0.38±0.02  |
| transient receptor potential cation channel, subfamily C, member 4 associated protein          | Trpc4ap               | 3.18±0.25  |
| transient receptor potential cation channel, subfamily M, member 4                             | Trpm4                 | 1±0.14     |
| transient receptor potential cation channel, subfamily M, member 7                             | Trpm7                 | 0.76±0.27  |
| transient receptor potential cation channel, subfamily V, member 4                             | Trpv4                 | 1.28±0.24  |
| transient receptor potential cation channel, subfamily V, member 4                             | Trpv1 /// Trpv4       | 0.52±0.32  |
| transient receptor potential cation channel, subfamily V, member 5                             | Trpv5                 | 0.32±0.03  |
| Transient receptor potential-related protein, ChaK                                             | Trpm7                 | 3.17±0.22  |
| transketolase                                                                                  | Tkt                   | 13.38±3.36 |
| translin                                                                                       | Tsn                   | 0.97±0.24  |
| translin-associated factor X                                                                   | Tsnax                 | 3.39±0.34  |
| translocase of inner mitochondrial membrane 10 homolog (yeast)                                 | Timm10                | 6.43±0.98  |
| translocase of inner mitochondrial membrane 13 homolog (yeast)                                 | Timm13                | 15.04±1.31 |
| translocase of inner mitochondrial membrane 17a                                                | Timm17a               | 8.04±1.92  |
| translocase of inner mitochondrial membrane 17b                                                | Timm17b               | 1.65±0.21  |
| translocase of inner mitochondrial membrane 22 homolog (yeast)                                 | Timm22                | 3.45±0.81  |
| translocase of inner mitochondrial membrane 23 homolog (yeast)                                 | Timm23                | 12.63±1.22 |
| translocase of inner mitochondrial membrane 44                                                 | Timm44                | 1.09±0.07  |
| translocase of inner mitochondrial membrane 8 homolog a1 (yeast)                               | Timm8a1               | 2.73±1.01  |
| translocase of inner mitochondrial membrane 8 homolog b (yeast)                                | Timm8b                | 21.05±6.37 |
| translocase of inner mitochondrial membrane 9 homolog (yeast)                                  | Timm9                 | 3.39±0.48  |
| translocase of outer mitochondrial membrane 20 homolog (yeast)                                 | Tomm20                | 18.05±3.33 |
| translocase of outer mitochondrial membrane 22 homolog (yeast)                                 | Tomm22                | 9.03±1.18  |
| translocase of outer mitochondrial membrane 34 (predicted)                                     | Tomm34_predicted      | 0.92±0.32  |
| translocase of outer mitochondrial membrane 40 homolog (yeast)                                 | Tomm40                | 3.74±0.27  |
| translocase of outer mitochondrial membrane 40 homolog B (yeast)                               | Tomm40b               | 0.88±0.2   |
| translocase of outer mitochondrial membrane 7 homolog (yeast)                                  | Tomm7                 | 14.91±0.37 |
| translocase of outer mitochondrial membrane 70 homolog A (yeast)                               | Tomm70a               | 2.29±0.08  |
| translocated promoter region                                                                   | Tpr                   | 2.11±0.57  |
| translocating chain-associating membrane protein 1                                             | Tram1                 | 11.95±0.16 |
| Translocation associated membrane protein 1                                                    | Tram1                 | 0.3±0.17   |
| translocation protein 1                                                                        | Tloc1                 | 17.89±1.59 |

|                                                                                                |                     |            |
|------------------------------------------------------------------------------------------------|---------------------|------------|
| translocator protein                                                                           | Tspo                | 10.36±1.43 |
| transmembrane 4 superfamily member 1 (predicted)                                               | Tm4sf1_predicted    | 0.46±4.1   |
| transmembrane 7 superfamily member 2                                                           | Tm7sf2              | 4.05±0.15  |
| transmembrane 7 superfamily member 3                                                           | Tm7sf3              | 0.67±0.72  |
| transmembrane 9 superfamily member 1                                                           | Tm9sf1              | 8.21±0.37  |
| transmembrane 9 superfamily member 2                                                           | Tm9sf2              | 16.61±0.57 |
| transmembrane 9 superfamily member 3                                                           | Tm9sf3              | 2.37±0.11  |
| transmembrane 9 superfamily protein member 4                                                   | Tm9sf4              | 2.12±0.04  |
| transmembrane and coiled coil domains 1                                                        | Tmcc1               | 0.46±0.2   |
| transmembrane and coiled coil domains 3                                                        | Tmcc3               | 1.8±0.06   |
| transmembrane and coiled-coil domains 1                                                        | Tmco1               | 5.5±0.72   |
| transmembrane and coiled-coil domains 3 (predicted)                                            | Tmco3_predicted     | 3.94±1.01  |
| transmembrane and coiled-coil domains 4                                                        | Tmco4               | 1.24±0.17  |
| transmembrane and coiled-coil domains 6                                                        | Tmco6               | 0.67±0.16  |
| transmembrane and tetratricopeptide repeat containing 4                                        | Tmtc4               | 4.9±0.57   |
| transmembrane and ubiquitin-like domain containing 1                                           | Tmub1               | 1±0.04     |
| transmembrane and ubiquitin-like domain containing 2                                           | Tmub2               | 3.96±0.32  |
| transmembrane BAX inhibitor motif containing 4                                                 | Tmbim4              | 2.83±1.81  |
| transmembrane channel-like gene family 4                                                       | Tmc4                | 13.24±1.27 |
| transmembrane emp24 domain containing 1                                                        | Tmed1               | 1.29±0.24  |
| transmembrane emp24 domain containing 3                                                        | Tmed3               | 2.68±0.89  |
| transmembrane emp24 domain trafficking protein 2                                               | Tmed2               | 10.78±2.35 |
| transmembrane emp24 protein transport domain containing 4 (predicted)                          | Tmed4_predicted     | 1.55±0.35  |
| transmembrane emp24 protein transport domain containing 5                                      | Tmed5               | 0.37±0.16  |
| transmembrane emp24 protein transport domain containing 6 (predicted)                          | Tmed6_predicted     | 5.89±1.41  |
| transmembrane emp24 protein transport domain containing 7                                      | Tmed7               | 8.53±3.12  |
| transmembrane emp24 protein transport domain containing 9                                      | Tmed9               | 5.44±0.19  |
| transmembrane emp24-like trafficking protein 10 (yeast)                                        | Tmed10              | 3.16±0.42  |
| transmembrane phosphoinositide 3-phosphatase and tensin homolog 2                              | Tpte2               | 0.28±0.01  |
| transmembrane protease, serine 2                                                               | Tmprs2              | 9.29±0.22  |
| transmembrane protein 1 (predicted)                                                            | Tmem1_predicted     | 1.69±0.09  |
| transmembrane protein 101                                                                      | Tmem101             | 0.98±0.08  |
| transmembrane protein 103 (predicted)                                                          | Tmem103_predicted   | 0.74±0.19  |
| transmembrane protein 106B                                                                     | Tmem106b            | 15.4±3.82  |
| transmembrane protein 106C                                                                     | Tmem106c            | 1.29±0.06  |
| transmembrane protein 109                                                                      | Tmem109             | 2.17±0.14  |
| transmembrane protein 11 (predicted)                                                           | Tmem11_predicted    | 1.97±0.12  |
| transmembrane protein 110                                                                      | Tmem110             | 0.41±0.02  |
| transmembrane protein 111                                                                      | Tmem111             | 5.31±1.05  |
| transmembrane protein 112B                                                                     | Tmem112b            | 1.08±0.29  |
| transmembrane protein 115 (predicted)                                                          | Tmem115_predicted   | 4.79±0.3   |
| transmembrane protein 120A                                                                     | Tmem120a            | 0.61±0.08  |
| transmembrane protein 123                                                                      | Tmem123             | 21.84±0.02 |
| transmembrane protein 126A                                                                     | Tmem126a            | 6.09±2.29  |
| transmembrane protein 126B                                                                     | Tmem126b            | 4.72±0.72  |
| transmembrane protein 128                                                                      | Tmem128             | 1.94±0.34  |
| transmembrane protein 129                                                                      | Tmem129             | 1.7±0.66   |
| transmembrane protein 131                                                                      | Tmem131             | 1.34±0.48  |
| transmembrane protein 132A                                                                     | Tmem132a            | 2.33±0.19  |
| transmembrane protein 134                                                                      | Tmem134             | 6.31±0.78  |
| transmembrane protein 135                                                                      | Tmem135             | 0.33±0.07  |
| transmembrane protein 138                                                                      | Tmem138             | 0.62±0.13  |
| transmembrane protein 139                                                                      | Tmem139             | 6.65±1.35  |
| transmembrane protein 140                                                                      | Tmem140             | 1.36±1.83  |
| transmembrane protein 141                                                                      | Tmem141             | 3.54±0.82  |
| transmembrane protein 143                                                                      | Tmem143             | 0.71±0.03  |
| transmembrane protein 147                                                                      | Tmem147             | 7.81±0.74  |
| transmembrane protein 14A (predicted)                                                          | Tmem14a_predicted   | 4.81±0.26  |
| transmembrane protein 14C                                                                      | Tmem14c             | 4.96±0.79  |
| transmembrane protein 157                                                                      | Tmem157             | 0.98±0.07  |
| transmembrane protein 160                                                                      | Tmem160             | 3.56±0.16  |
| transmembrane protein 161A                                                                     | Tmem161a            | 1.55±0.68  |
| transmembrane protein 161B                                                                     | Tmem161b            | 2.34±1.17  |
| transmembrane protein 164                                                                      | Tmem164             | 2.69±0.29  |
| transmembrane protein 165                                                                      | Tmem165             | 3.93±0.69  |
| transmembrane protein 166                                                                      | Tmem166             | 7.73±0.99  |
| transmembrane protein 168                                                                      | Tmem168             | 3.34±0.3   |
| transmembrane protein 16F (predicted)                                                          | Tmem16f_predicted   | 6.52±0.27  |
| transmembrane protein 16K                                                                      | Tmem16k             | 1.72±0.34  |
| transmembrane protein 17                                                                       | Tmem17              | 0.9±0.18   |
| transmembrane protein 171                                                                      | Tmem171             | 1.74±1.02  |
| transmembrane protein 177                                                                      | Tmem177             | 1.3±0.89   |
| transmembrane protein 179B                                                                     | Tmem179b            | 5.67±0.68  |
| transmembrane protein 183A                                                                     | Tmem183a            | 3.08±0.15  |
| transmembrane protein 185B                                                                     | Tmem185b            | 2.46±0.46  |
| transmembrane protein 186                                                                      | Tmem186             | 1.06±0.32  |
| transmembrane protein 188                                                                      | Tmem188             | 2.18±0.14  |
| transmembrane protein 189 /// similar to ubiquitin-conjugating enzyme E2 variant 1 (predicted) | RGD1562209_predicte | 0.72±0.03  |
| transmembrane protein 19                                                                       | Tmem19              | 1.12±0.23  |
| transmembrane protein 192                                                                      | Tmem192             | 1.26±0.16  |
| transmembrane protein 205                                                                      | Tmem205             | 2.21±0.72  |
| transmembrane protein 208                                                                      | Tmem208             | 5.19±0.56  |
| transmembrane protein 209                                                                      | Tmem209             | 1.82±0.11  |
| transmembrane protein 24                                                                       | Tmem24              | 0.41±0.11  |
| transmembrane protein 30A                                                                      | Tmem30a             | 4.57±0.68  |
| transmembrane protein 30B (predicted)                                                          | Tmem30b_predicted   | 7.42±0.1   |
| transmembrane protein 32 (predicted)                                                           | Tmem32_predicted    | 6.22±0.29  |

|                                                                          |                            |            |
|--------------------------------------------------------------------------|----------------------------|------------|
| transmembrane protein 33                                                 | Tmem33                     | 1.82±0.23  |
| transmembrane protein 34                                                 | Tmem34                     | 3.76±0.3   |
| transmembrane protein 37                                                 | Tmem37                     | 15.43±6.35 |
| transmembrane protein 38a (predicted)                                    | Tmem38a_predicted          | 0.76±0.09  |
| transmembrane protein 38B                                                | Tmem38b                    | 2.16±0.33  |
| transmembrane protein 39a                                                | Tmem39a                    | 0.74±0.01  |
| transmembrane protein 39b                                                | Tmem39b                    | 0.73±0     |
| transmembrane protein 4                                                  | Tmem4                      | 4.42±0.29  |
| transmembrane protein 41B                                                | Tmem41b                    | 6.28±0.82  |
| transmembrane protein 42 (predicted)                                     | Tmem42_predicted           | 3.55±0.16  |
| transmembrane protein 43                                                 | Tmem43                     | 3.1±0.17   |
| transmembrane protein 49                                                 | Tmem49                     | 1.39±1.08  |
| transmembrane protein 5                                                  | Tmem5                      | 1.13±0.2   |
| transmembrane protein 50A (predicted)                                    | Tmem50a_predicted          | 3.82±0.38  |
| transmembrane protein 50B                                                | Tmem50b                    | 14.01±0.4  |
| transmembrane protein 51                                                 | Tmem51                     | 0.82±0.37  |
| transmembrane protein 53 (predicted)                                     | Tmem53_predicted           | 1.37±0.24  |
| transmembrane protein 55A                                                | Tmem55a                    | 4.05±1.71  |
| transmembrane protein 55B                                                | Tmem55b                    | 2.12±0.12  |
| transmembrane protein 57                                                 | Tmem57                     | 1.48±0.17  |
| transmembrane protein 58 (predicted)                                     | Tmem58_predicted           | 0.57±0.1   |
| transmembrane protein 60 (predicted)                                     | Tmem60_predicted           | 1.91±0.3   |
| transmembrane protein 62                                                 | Tmem62                     | 1.31±0.03  |
| transmembrane protein 63a (predicted)                                    | Tmem63a_predicted          | 2.37±0.42  |
| transmembrane protein 66                                                 | Tmem66                     | 7.36±0.14  |
| transmembrane protein 67                                                 | Tmem67                     | 1.11±0     |
| transmembrane protein 68 (predicted)                                     | Tmem68_predicted           | 0.71±0.17  |
| transmembrane protein 69                                                 | Tmem69                     | 2.67±1.07  |
| transmembrane protein 77                                                 | Tmem77                     | 0.84±0.29  |
| transmembrane protein 79                                                 | Tmem79                     | 0.77±0.14  |
| transmembrane protein 8 (five membrane-spanning domains) (predicted)     | Tmem8_predicted            | 4.07±1.34  |
| transmembrane protein 80                                                 | Tmem80                     | 0.95±0.17  |
| transmembrane protein 81                                                 | Tmem81                     | 0.44±0.08  |
| transmembrane protein 82                                                 | Tmem82                     | 0.35±0.16  |
| transmembrane protein 85                                                 | Tmem85                     | 5.38±0.4   |
| transmembrane protein 86A (predicted)                                    | Tmem86a_predicted          | 6.84±0.3   |
| transmembrane protein 87A (predicted)                                    | Tmem87a_predicted          | 1.15±0.22  |
| transmembrane protein 87B                                                | Tmem87b                    | 1±0.28     |
| transmembrane protein 9 (predicted)                                      | Tmem9_predicted            | 2.52±0.27  |
| transmembrane protein 93 (predicted)                                     | Tmem93_predicted           | 3.91±0.34  |
| transmembrane protein 97                                                 | Tmem97                     | 3.02±0.46  |
| transmembrane protein 98                                                 | Tmem98                     | 4.9±0.01   |
| transmembrane protein with EGF-like and two follistatin-like domains 1   | Tmeff1                     | 1.34±0.22  |
| transmembrane, prostate androgen induced RNA (predicted)                 | Tmepai_predicted           | 7.66±0.99  |
| transporter 1, ATP-binding cassette, sub-family B (MDR)                  | Btnl3 / Btnl4 / Btnl5 /    | 11.93±2.28 |
| transporter 1, ATP-binding cassette, sub-family B (MDR)                  | Btnl3 / Btnl4 / Btnl5 / Hl | 3.9±2.77   |
| transportin 1                                                            | Tnpo1                      | 0.86±0.59  |
| transportin 2 (importin 3, karyopherin beta 2b) (predicted)              | Tnpo2_predicted            | 1.38±0.12  |
| transportin 3                                                            | Tnpo3                      | 0.9±0.28   |
| tribbles homolog 1 (Drosophila)                                          | Trib1                      | 0.38±0.15  |
| tribbles homolog 2 (Drosophila)                                          | Trib2                      | 3.95±1.08  |
| trichoplein, keratin filament binding (predicted)                        | Tchp_predicted             | 0.92±0.11  |
| trichorhinophalangeal syndrome I (human)                                 | Trps1                      | 0.49±0.42  |
| trimethylguanosine synthase homolog (S. cerevisiae)                      | Tgs1                       | 1.35±0.65  |
| trimethyllysine hydroxylase, epsilon                                     | Tmthe                      | 1.07±0.21  |
| Trinucleotide repeat containing 6 (predicted)                            | Tnrc6_predicted            | 0.53±0.38  |
| trinucleotide repeat containing 6a                                       | Tnrc6a                     | 1.2±0.23   |
| trinucleotide repeat containing 6B                                       | Tnrc6b                     | 0.93±0.27  |
| TRIO and F-actin binding protein                                         | Triobp                     | 0.89±0.15  |
| triosephosphate isomerase 1                                              | Tpi1                       | 35.95±5.14 |
| tripartite motif protein 16 (predicted)                                  | Trim16_predicted           | 1.55±0.27  |
| tripartite motif protein 2                                               | Trim2                      | 1.45±0.2   |
| tripartite motif protein 32                                              | Trim32                     | 2.7±0.97   |
| Tripartite motif protein 37 (predicted)                                  | Trim37_predicted           | 0.79±0.11  |
| tripartite motif protein 8 (predicted) /// tripartite motif-containing 8 | Trim8 /// Trim8_predict    | 2.36±0.39  |
| tripartite motif-containing 11                                           | Trim11                     | 0.77±0.14  |
| tripartite motif-containing 23                                           | Trim23                     | 0.24±0.1   |
| tripartite motif-containing 24                                           | Trim24                     | 1.7±0.84   |
| tripartite motif-containing 25                                           | Trim25                     | 1.6±0.8    |
| tripartite motif-containing 26                                           | Trim26                     | 0.58±0.21  |
| tripartite motif-containing 27                                           | Trim27                     | 1.67±0.12  |
| tripartite motif-containing 28                                           | Trim28                     | 6.77±0.1   |
| tripartite motif-containing 3                                            | Trim3                      | 0.95±0.05  |
| tripartite motif-containing 33                                           | Trim33                     | 1.67±0.13  |
| tripartite motif-containing 35                                           | Trim35                     | 9.02±1.07  |
| tripartite motif-containing 37                                           | Trim37                     | 0.56±0.13  |
| tripartite motif-containing 39                                           | Trim39                     | 0.56±0.33  |
| tripartite motif-containing 41                                           | Trim41                     | 1.27±0.16  |
| tripartite motif-containing 45                                           | Trim45                     | 0.5±0      |
| tripartite motif-containing 6                                            | Trim6                      | 1.62±0.49  |
| tripartite motif-containing 63                                           | Trim63                     | 0.66±0.7   |
| tripeptidyl peptidase I                                                  | Tpp1                       | 3.97±0.77  |
| tripeptidyl peptidase II                                                 | Tpp2                       | 1.02±0.43  |
| triple functional domain (PTPRF interacting)                             | Trio                       | 2.71±0.48  |
| Trk-fused gene                                                           | Tfq                        | 2.58±0.14  |
| TRM1 tRNA methyltransferase 1 homolog (S. cerevisiae)                    | Trmt1                      | 1.07±0     |
| TRM5 tRNA methyltransferase 5 homolog (S. cerevisiae) (predicted)        | Trmt5_predicted            | 0.6±0.19   |

|                                                                                                                               |                         |             |
|-------------------------------------------------------------------------------------------------------------------------------|-------------------------|-------------|
| tRNA aspartic acid methyltransferase 1                                                                                        | Trdmt1                  | 0.35±0.09   |
| tRNA isopentenyltransferase 1 (predicted)                                                                                     | Trit1_predicted         | 1.05±0.52   |
| tRNA methyltransferase 12 homolog (S. cerevisiae)                                                                             | Trmt12                  | 0.34±0.02   |
| tRNA methyltransferase 6 homolog (S. cerevisiae)                                                                              | Trmt6                   | 0.52±0.19   |
| tRNA nucleotidyl transferase, CCA-adding, 1                                                                                   | Trmt1                   | 3.15±0.71   |
| tRNA phosphotransferase 1 (predicted)                                                                                         | Trpt1_predicted         | 1.6±0.05    |
| tRNA selenocysteine associated protein                                                                                        | Secp43                  | 5.52±0.21   |
| tRNA splicing endonuclease 2 homolog (SEN2, S. cerevisiae)                                                                    | Tsen2                   | 0.69±0.03   |
| tRNA splicing endonuclease 34 homolog (SEN34, S. cerevisiae)                                                                  | Tsen34                  | 8.22±0.48   |
| tRNA splicing endonuclease 54 homolog (S. cerevisiae)                                                                         | Tsen54                  | 1.37±0.17   |
| tRNA-histidine guanylyltransferase 1-like (S. cerevisiae)                                                                     | Thg1l                   | 0.35±0.03   |
| tRNA-yW synthesizing protein 1 homolog (S. cerevisiae)                                                                        | Tyw1                    | 0.57±0.25   |
| tRNA-yW synthesizing protein 3 homolog (S. cerevisiae)                                                                        | Tyw3                    | 1.37±0.14   |
| tropomodulin 3                                                                                                                | Tmod3                   | 1.45±0.76   |
| tropomodulin 4 (predicted)                                                                                                    | Tmod4_predicted         | 3.06±0.85   |
| tropomyosin 1, alpha                                                                                                          | Tpm1                    | 0.92±1.61   |
| tropomyosin 3, gamma                                                                                                          | Tpm3                    | 1.79±2.33   |
| TruB pseudouridine (psi) synthase homolog 1 (E. coli)                                                                         | Trub1                   | 0.51±0.18   |
| TruB pseudouridine (psi) synthase homolog 2 (E. coli)                                                                         | Trub2                   | 3.25±0.24   |
| trypsin domain containing 1 (predicted)                                                                                       | Tysnd1_predicted        | 1.11±0.32   |
| tryptophan rich basic protein                                                                                                 | Wrb                     | 1.41±0.2    |
| tryptophanyl-tRNA synthetase                                                                                                  | Wars                    | 1.91±0.08   |
| TSC22 domain family 3                                                                                                         | Tsc22d3                 | 6.6±5.2     |
| TSC22 domain family, member 1                                                                                                 | Tsc22d1                 | 6.4±7.75    |
| TSC22 domain family, member 4                                                                                                 | Tsc22d4                 | 3.69±0.64   |
| TSC22 domain family, member 4 /// similar to TSC22 domain family protein 4 (TSC22-related-inducible leucine zipper protein 2) | LOC686226 /// Tsc22d    | 0.66±0.3    |
| TSFY-like 4                                                                                                                   | Tsyp14                  | 0.93±0.13   |
| Tu translation elongation factor, mitochondrial (predicted)                                                                   | Tufm_predicted          | 13.83±1.89  |
| tubby like protein 4                                                                                                          | Tulp4                   | 0.98±0.12   |
| tuberous sclerosis 2                                                                                                          | Tsc2                    | 2.29±0.2    |
| tubulin cofactor a                                                                                                            | Tbca                    | 20.2±1.47   |
| tubulin folding cofactor B                                                                                                    | Tbcb                    | 2.82±0.96   |
| Tubulin tyrosine ligase                                                                                                       | Ttl                     | 1.22±0.21   |
| tubulin tyrosine ligase-like 1                                                                                                | Ttl1                    | 0.26±0.06   |
| tubulin tyrosine ligase-like family, member 12 (predicted)                                                                    | Ttl12_predicted         | 1.33±0.37   |
| tubulin, alpha 1A /// tubulin, alpha 1C /// tubulin, alpha 1B                                                                 | Tuba1a /// Tuba1b /// T | 14.73±3.05  |
| tubulin, alpha 4A                                                                                                             | Tuba4a                  | 9.72±6.21   |
| tubulin, beta 2a                                                                                                              | Tubb2a                  | 10.93±0.11  |
| tubulin, beta 2c                                                                                                              | Tubb2c                  | 5.91±1.98   |
| tubulin, beta 4                                                                                                               | Tubb4                   | 0.45±0.27   |
| tubulin, beta 5                                                                                                               | Tubb5                   | 2.84±0.22   |
| tubulin, gamma 1                                                                                                              | Tubg1                   | 1.97±0.73   |
| tubulin, gamma complex associated protein 2                                                                                   | Tubgcp2                 | 1.23±0.57   |
| tubulin, gamma complex associated protein 3                                                                                   | Tubgcp3                 | 0.43±0.32   |
| tubulin, gamma complex associated protein 6 (predicted)                                                                       | Tubgcp6_predicted       | 0.56±0.16   |
| tubulin-specific chaperone c (predicted)                                                                                      | Tbcc_predicted          | 0.52±0.07   |
| tubulin-specific chaperone d                                                                                                  | Tbcd                    | 1.39±0.28   |
| tubulin-specific chaperone e                                                                                                  | Tbce                    | 1.65±0.2    |
| tubulointerstitial nephritis antigen-like 1                                                                                   | Tinagl1                 | 0.27±2.27   |
| tudor domain containing 3                                                                                                     | Tdrd3                   | 1.32±0.4    |
| tudor domain containing 7                                                                                                     | Tdrd7                   | 1.87±0.16   |
| tuftelin interacting protein 11                                                                                               | Tfip11                  | 0.32±0.12   |
| tumor necrosis factor (ligand) superfamily, member 13                                                                         | Tnfsf13                 | 0.94±0.13   |
| tumor necrosis factor receptor superfamily, member 12a                                                                        | Tnfrsf12a               | 0.3±2.86    |
| tumor necrosis factor receptor superfamily, member 1a                                                                         | Tnfrsf1a                | 1.6±0.71    |
| tumor necrosis factor receptor superfamily, member 21 (predicted)                                                             | Tnfrsf21_predicted      | 5.28±0.7    |
| tumor necrosis factor superfamily, member 5-induced protein 1 (predicted)                                                     | Tnfsf5ip1_predicted     | 2.41±0.22   |
| tumor necrosis factor, alpha-induced protein 1 (endothelial)                                                                  | Tnfaip1                 | 4.63±0.31   |
| tumor necrosis factor, alpha-induced protein 2                                                                                | Tnfaip2                 | 0.55±0.22   |
| tumor necrosis factor, alpha-induced protein 8 (predicted)                                                                    | Tnfaip8_predicted       | 0.52±0.21   |
| tumor protein D52 (predicted)                                                                                                 | Tpd52_predicted         | 2.39±0.31   |
| tumor protein D52-like 1                                                                                                      | Tpd52l1                 | 1.5±0.75    |
| tumor protein D52-like 2                                                                                                      | Tpd52l2                 | 0.69±0.09   |
| tumor protein p53 inducible nuclear protein 2                                                                                 | Trp53inp2               | 12.81±0.8   |
| tumor protein, translationally-controlled 1                                                                                   | Tpt1                    | 46.79±5.04  |
| tumor rejection antigen gp96 (predicted)                                                                                      | Tra1_predicted          | 6.5±1.47    |
| tumor suppressing subtransferable candidate 1                                                                                 | Tssc1                   | 0.25±0.15   |
| tumor suppressor candidate 2                                                                                                  | Tusc2                   | 0.95±0.01   |
| tumor suppressor candidate 3                                                                                                  | Tusc3                   | 5.08±0.1    |
| tumor suppressor candidate 4                                                                                                  | Tusc4                   | 3.53±0.42   |
| tumor susceptibility gene 101                                                                                                 | Tsg101                  | 3.37±0.37   |
| tumor-associated calcium signal transducer 1                                                                                  | Tacstd1                 | 34.14±10.17 |
| tumor-associated calcium signal transducer 2                                                                                  | Tacstd2                 | 4.5±0.85    |
| tumor-suppressing subchromosomal transferable fragment 4                                                                      | Tssc4                   | 2.04±0.28   |
| tweety homolog 3 (Drosophila) (predicted)                                                                                     | Tthy3_predicted         | 1.11±0.44   |
| twinfilin, actin-binding protein, homolog 1 (Drosophila)                                                                      | Twf1                    | 3.3±0.03    |
| twist gene homolog 1 (Drosophila)                                                                                             | Twist1                  | 0.97±0.03   |
| TWIST neighbor (predicted)                                                                                                    | Twistnb_predicted       | 1.36±0.01   |
| twisted gastrulation homolog 1 (Drosophila) (predicted)                                                                       | Twsg1_predicted         | 12.24±3.85  |
| two pore channel 1                                                                                                            | Tpcn1                   | 4.85±1.04   |
| two pore segment channel 2 (predicted)                                                                                        | Tpcn2_predicted         | 0.38±0.04   |
| type 1 tumor necrosis factor receptor shedding aminopeptidase regulator                                                       | Arts1                   | 3.21±0.83   |
| TYRO3 protein tyrosine kinase 3                                                                                               | Tyro3                   | 0.34±0.12   |
| tyrosine 3-monooxygenase/tryptophan 5-monooxygenase activation protein, beta polypeptide                                      | Ywhab                   | 10.39±0.65  |
| tyrosine 3-monooxygenase/tryptophan 5-monooxygenase activation protein, epsilon polypeptide                                   | Ywhae                   | 15.36±3.37  |
| tyrosine 3-monooxygenase/tryptophan 5-monooxygenase activation protein, eta polypeptide                                       | Ywhah                   | 7.43±2.6    |
| tyrosine 3-monooxygenase/tryptophan 5-monooxygenase activation protein, gamma polypeptide                                     | Ywhag                   | 5.53±0.55   |

|                                                                                                                                      |                        |            |
|--------------------------------------------------------------------------------------------------------------------------------------|------------------------|------------|
| tyrosine 3-monooxygenase/tryptophan 5-monooxygenase activation protein, theta polypeptide                                            | Ywhaq                  | 18.73±1.49 |
| tyrosine 3-monooxygenase/tryptophan 5-monooxygenase activation protein, zeta polypeptide                                             | Ywhaz                  | 13.31±0.07 |
| tyrosine kinase, non-receptor, 2                                                                                                     | Tnk2                   | 0.69±0     |
| tyrosyl-DNA phosphodiesterase 1                                                                                                      | Tdp1                   | 0.93±0.23  |
| tyrosylprotein sulfotransferase 2                                                                                                    | Tpst2                  | 1.6±0.3    |
| tyrosyl-tRNA synthetase                                                                                                              | Yars                   | 1.75±0.19  |
| tyrosyl-tRNA synthetase 2 (mitochondrial)                                                                                            | Yars2                  | 0.95±0.55  |
| U1 small nuclear ribonucleoprotein C /// similar to U1 small nuclear ribonucleoprotein C (U1 snRNP protein C) (U1C protein) (U1-C)   | LOC685273 /// Snrpc    | 4.1±0.19   |
| U1 small nuclear ribonucleoprotein polypeptide A (predicted)                                                                         | Snrp70_predicted       | 2.72±0.74  |
| U2 small nuclear ribonucleoprotein auxiliary factor (U2AF) 2 /// similar to U2 (RNU2) small nuclear RNA auxiliary factor 2 isoform b | LOC690372 /// U2af2    | 4.86±1.46  |
| U2 small nuclear ribonucleoprotein B (predicted)                                                                                     | Snrpb2_predicted       | 1.39±0.83  |
| U2 small nuclear RNA auxiliary factor 1-like 4 /// similar to Hypothetical protein MGC30332 (predicted)                              | RGD1563574_predicte    | 1.44±0.18  |
| U2AF homology motif (UHM) kinase 1                                                                                                   | Uhmk1                  | 0.26±0.2   |
| U7 snRNP-specific Sm-like protein LSM10                                                                                              | Lsm10                  | 1.68±0.72  |
| UbiA prenyltransferase domain containing 1 (predicted)                                                                               | Ubiad1_predicted       | 0.61±0.2   |
| ubinnuclein 1 (predicted)                                                                                                            | Ubn1_predicted         | 0.42±0.19  |
| Ubiquilin 1                                                                                                                          | Ubqln1                 | 4.54±0.16  |
| ubiquilin 2 (predicted)                                                                                                              | Ubqln2_predicted       | 2.98±0.46  |
| ubiquilin 4 (predicted)                                                                                                              | Ubqln4_predicted       | 1.5±0.13   |
| ubiquinol cytochrome c reductase core protein 2                                                                                      | Uqcr2                  | 44.49±4.31 |
| ubiquinol-cytochrome c reductase binding protein (predicted)                                                                         | LOC687741 /// Uqcrb // | 41.76±3.71 |
| ubiquinol-cytochrome c reductase core protein 1                                                                                      | Uqcr1                  | 35.37±4.77 |
| ubiquinol-cytochrome c reductase hinge protein                                                                                       | Uqcrh                  | 44.57±2.05 |
| ubiquinol-cytochrome c reductase, 6.4kDa subunit                                                                                     | Uqcr                   | 45.08±2.4  |
| ubiquinol-cytochrome c reductase, complex III subunit VII                                                                            | Uqcrq                  | 39.62±6.34 |
| ubiquinol-cytochrome c reductase, Rieske iron-sulfur polypeptide 1                                                                   | Uqcrfs1                | 39.88±2.47 |
| ubiquitin A-52 residue ribosomal protein fusion product 1                                                                            | Uba52                  | 28.89±3.47 |
| ubiquitin associated domain containing 1                                                                                             | Ubac1                  | 4.27±1.15  |
| ubiquitin B                                                                                                                          | Ubb                    | 49.18±5.25 |
| ubiquitin C                                                                                                                          | Ubc                    | 24.66±5.08 |
| ubiquitin carboxyl-terminal esterase L3 (ubiquitin thiolesterase)                                                                    | LOC679036 /// RGD15    | 2.41±0.73  |
| ubiquitin carboxyl-terminal esterase L5                                                                                              | Uchl5                  | 3.88±0.88  |
| ubiquitin domain containing 1                                                                                                        | Ubt1                   | 0.52±0.05  |
| ubiquitin family domain containing 1                                                                                                 | Ubfd1                  | 1.02±0.23  |
| ubiquitin fusion degradation 1-like                                                                                                  | Ufd1l                  | 3.27±0.33  |
| ubiquitin interaction motif containing 1                                                                                             | Uimc1                  | 3.08±0.74  |
| ubiquitin protein ligase E3A (predicted)                                                                                             | Ube3a_predicted        | 2.18±0.26  |
| ubiquitin protein ligase E3C                                                                                                         | Ube3c                  | 1.54±0.21  |
| ubiquitin related modifier 1 homolog (S. cerevisiae)                                                                                 | Urm1                   | 0.63±0.31  |
| ubiquitin specific peptidase 1                                                                                                       | Usp1                   | 3.73±0.87  |
| ubiquitin specific peptidase 10                                                                                                      | Usp10                  | 3.2±0.12   |
| ubiquitin specific peptidase 11                                                                                                      | Usp11                  | 0.8±0.28   |
| ubiquitin specific peptidase 12                                                                                                      | Usp12                  | 1.34±0.4   |
| ubiquitin specific peptidase 14                                                                                                      | Usp14                  | 4.71±0.83  |
| ubiquitin specific peptidase 15                                                                                                      | Usp15                  | 0.56±0.08  |
| ubiquitin specific peptidase 18                                                                                                      | Usp18                  | 0.93±0.35  |
| ubiquitin specific peptidase 19                                                                                                      | Usp19                  | 2.17±0.06  |
| ubiquitin specific peptidase 2                                                                                                       | Usp2                   | 5.11±1.32  |
| ubiquitin specific peptidase 20                                                                                                      | Usp20                  | 1.03±0.27  |
| ubiquitin specific peptidase 25                                                                                                      | Usp25                  | 6.9±0.86   |
| ubiquitin specific peptidase 28                                                                                                      | Usp28                  | 0.97±0.2   |
| ubiquitin specific peptidase 3                                                                                                       | Usp3                   | 2.35±0.04  |
| ubiquitin specific peptidase 33                                                                                                      | Usp33                  | 5.51±1.58  |
| ubiquitin specific peptidase 35                                                                                                      | Usp35                  | 0.39±0.32  |
| ubiquitin specific peptidase 36                                                                                                      | Usp36                  | 2.13±0.17  |
| ubiquitin specific peptidase 38                                                                                                      | Usp38                  | 1.27±0.01  |
| ubiquitin specific peptidase 39                                                                                                      | Usp39                  | 1.33±0.2   |
| ubiquitin specific peptidase 4 (proto-oncogene)                                                                                      | Usp4                   | 1.9±0.15   |
| ubiquitin specific peptidase 40                                                                                                      | Usp40                  | 2.61±0.33  |
| ubiquitin specific peptidase 42                                                                                                      | Usp42                  | 0.97±0.3   |
| ubiquitin specific peptidase 46                                                                                                      | Usp46                  | 0.37±0.11  |
| ubiquitin specific peptidase 47                                                                                                      | Usp47                  | 2.34±0.74  |
| ubiquitin specific peptidase 5 (isopeptidase T)                                                                                      | Usp5                   | 2.18±0.53  |
| ubiquitin specific peptidase 52                                                                                                      | Usp52                  | 0.21±0.05  |
| ubiquitin specific peptidase 54                                                                                                      | Usp54                  | 0.36±0.08  |
| ubiquitin specific peptidase 7                                                                                                       | Usp7                   | 2.09±0.09  |
| ubiquitin specific peptidase 8                                                                                                       | Usp8                   | 3.95±0.44  |
| Ubiquitin specific peptidase 9, X chromosome (predicted)                                                                             | Usp9x_predicted        | 3.28±0.14  |
| ubiquitin specific peptidase like 1                                                                                                  | Usp1l                  | 1.42±0.15  |
| ubiquitin specific protease 13 (isopeptidase T-3) (predicted)                                                                        | Usp13_predicted        | 0.24±0.01  |
| ubiquitin specific protease 24 (predicted)                                                                                           | Usp24_predicted        | 1.69±0.62  |
| ubiquitin specific protease 32 (predicted)                                                                                           | Usp32_predicted        | 1.56±0.16  |
| ubiquitin specific protease 43                                                                                                       | rCG_32844              | 0.52±0.28  |
| ubiquitin specific protease 48                                                                                                       | Usp48                  | 1.8±0.13   |
| Ubiquitin specific protease 7 (herpes virus-associated)                                                                              | Usp7                   | 3.29±0.52  |
| ubiquitin-activating enzyme E1C                                                                                                      | Ube1c                  | 4.15±1.41  |
| ubiquitin-activating enzyme E1-domain containing 1                                                                                   | Ube1dc1                | 1.33±0.05  |
| ubiquitin-activating enzyme E1-like 2                                                                                                | Ube1l2                 | 1.45±0.49  |
| ubiquitin-associated protein 1                                                                                                       | Ubap1                  | 1.49±0.33  |
| ubiquitin-associated protein 2 (predicted)                                                                                           | Ubap2_predicted        | 2.6±0.29   |
| ubiquitination factor E4A, UFD2 homolog (S. cerevisiae)                                                                              | Ube4a                  | 2.64±0.4   |
| ubiquitination factor E4B, UFD2 homolog (S. cerevisiae) (predicted)                                                                  | Ube4b_predicted        | 5.57±0.07  |
| ubiquitin-conjugating enzyme E2 variant 1 (predicted)                                                                                | Ube2v1_predicted       | 8.5±0.41   |
| ubiquitin-conjugating enzyme E2 variant 2                                                                                            | Ube2v2                 | 0.92±0.37  |
| Ubiquitin-conjugating enzyme E2, J1 (predicted)                                                                                      | Ube2j1_predicted       | 2.07±0.3   |
| ubiquitin-conjugating enzyme E2, J2 homolog (yeast)                                                                                  | Ube2j2                 | 3.07±0.07  |
| ubiquitin-conjugating enzyme E2A, RAD6 homolog (S. cerevisiae)                                                                       | Ube2a                  | 2.84±0.43  |

|                                                                                                        |                              |            |
|--------------------------------------------------------------------------------------------------------|------------------------------|------------|
| ubiquitin-conjugating enzyme E2B, RAD6 homology (S. cerevisiae)                                        | Ube2b                        | 7.36±0.45  |
| ubiquitin-conjugating enzyme E2C (predicted)                                                           | Ube2c_predicted              | 0.99±0.08  |
| ubiquitin-conjugating enzyme E2D 1, UBC4/5 homolog (yeast) (predicted)                                 | Ube2d1_predicted             | 0.96±0.1   |
| Ubiquitin-conjugating enzyme E2D 2                                                                     | Ube2d2                       | 5.13±0.88  |
| ubiquitin-conjugating enzyme E2D 3 (UBC4/5 homolog, yeast)                                             | Ube2d3                       | 12.18±0.15 |
| ubiquitin-conjugating enzyme E2E 2 (UBC4/5 homolog, yeast)                                             | Ube2e2                       | 6.46±0.64  |
| ubiquitin-conjugating enzyme E2E 3, UBC4/5 homolog (yeast) (predicted)                                 | Ube2e3_predicted             | 7.3±1.55   |
| ubiquitin-conjugating enzyme E2F (putative)                                                            | Ube2f                        | 2.45±0.3   |
| ubiquitin-conjugating enzyme E2G 1 (UBC7 homolog, C. elegans)                                          | Ube2g1                       | 6.77±0.01  |
| ubiquitin-conjugating enzyme E2G 2 (predicted)                                                         | Ube2g2_predicted             | 0.88±0.11  |
| ubiquitin-conjugating enzyme E2I                                                                       | Ube2i                        | 3.94±0.45  |
| ubiquitin-conjugating enzyme E2L 3 (predicted)                                                         | Ube2l3_predicted             | 5.33±0.85  |
| ubiquitin-conjugating enzyme E2L 6                                                                     | Ube2l6                       | 0.5±0.01   |
| ubiquitin-conjugating enzyme E2M (UBC12 homolog, yeast) (predicted)                                    | Ube2m_predicted              | 5.25±0.44  |
| ubiquitin-conjugating enzyme E2M (UBC12 homolog, yeast) (predicted) /// chromatin modifying protein 2A | Chmp2a /// Ube2m_pre         | 8.74±1.87  |
| ubiquitin-conjugating enzyme E2N                                                                       | Ube2n                        | 4.42±0.1   |
| ubiquitin-conjugating enzyme E2O (predicted)                                                           | Ube2o_predicted              | 2.45±0.93  |
| ubiquitin-conjugating enzyme E2Q (putative) 1                                                          | Ube2q1                       | 3.43±0.18  |
| ubiquitin-conjugating enzyme E2Q (putative) 2 (predicted)                                              | Ube2q2_predicted             | 3.47±0.27  |
| ubiquitin-conjugating enzyme E2S (predicted)                                                           | Ube2s_predicted              | 3.03±0.31  |
| ubiquitin-conjugating enzyme E2T (putative) (predicted)                                                | Ube2t_predicted              | 0.21±0.09  |
| ubiquitin-conjugating enzyme E2Z (putative)                                                            | Ube2z                        | 1.56±0.23  |
| ubiquitin-fold modifier 1                                                                              | Ufm1                         | 4.48±0.34  |
| ubiquitin-fold modifier conjugating enzyme 1                                                           | Ufc1                         | 4.43±1.49  |
| ubiquitin-like 3                                                                                       | Ubl3                         | 11.92±5.34 |
| ubiquitin-like 4                                                                                       | Ubl4                         | 2.78±0.74  |
| ubiquitin-like 5                                                                                       | Ubl5                         | 15.93±0.52 |
| ubiquitin-like 7 (bone marrow stromal cell-derived)                                                    | Ubl7                         | 3.01±0.04  |
| ubiquitin-like domain containing CTD phosphatase 1                                                     | Ublcp1                       | 5.32±0.47  |
| ubiquitin-like modifier activating enzyme 1                                                            | Uba1                         | 9.69±1.57  |
| ubiquitin-like, containing PHD and RING finger domains 2 (predicted)                                   | Uhrf2_predicted              | 1.84±0.21  |
| ubiquitin-like, containing PHD and RING finger domains, 1                                              | Uhrf1                        | 0.31±0.07  |
| ubiquitously expressed transcript                                                                      | Uxt                          | 3.02±0.09  |
| ubiquitously transcribed tetratricopeptide repeat gene, X chromosome (predicted)                       | Utx_predicted                | 2.38±0.44  |
| UBX domain containing 1                                                                                | Ubx1                         | 2.7±0.08   |
| UBX domain containing 2                                                                                | Ubx2                         | 6.48±0.12  |
| UBX domain containing 4                                                                                | Ubx4                         | 4.54±0.03  |
| UBX domain containing 6 (predicted)                                                                    | Ubx6_predicted               | 2.3±0.32   |
| UBX domain containing 8                                                                                | Ubx8                         | 1.26±0.42  |
| UCHL5 interacting protein                                                                              | Uchl5ip                      | 0.95±0.04  |
| UDP galactosyltransferase 8A                                                                           | Ugt8a                        | 1.17±0.25  |
| UDP glycosyltransferase 1 family, polypeptide A1                                                       | Ugt1a1 /// Ugt1a2 /// Ugt1a3 | 14.82±0.91 |
| UDP-Gal:betaGlcNAc beta 1,4- galactosyltransferase, polypeptide 1                                      | B4galt1_predicted            | 3.03±0.25  |
| UDP-Gal:betaGlcNAc beta 1,4-galactosyltransferase, polypeptide 3                                       | B4galt3                      | 2.32±0.14  |
| UDP-Gal:betaGlcNAc beta 1,4-galactosyltransferase, polypeptide 5 (predicted)                           | B4galt5_predicted            | 0.26±0.02  |
| UDP-Gal:betaGlcNAc beta 1,4-galactosyltransferase, polypeptide 6                                       | B4galt6                      | 0.97±0.47  |
| UDP-GalNAc:betaGlcNAc beta 1,3-galactosaminyltransferase, polypeptide 1                                | B3galt1                      | 0.94±0.34  |
| UDP-GlcNAc:betaGal beta-1,3-N-acetylglucosaminyltransferase 1                                          | B3gnt1                       | 2.16±1.19  |
| UDP-GlcNAc:betaGal beta-1,3-N-acetylglucosaminyltransferase 2                                          | B3gnt2                       | 5.74±0.32  |
| UDP-GlcNAc:betaGal beta-1,3-N-acetylglucosaminyltransferase 7                                          | B3gnt7                       | 0.64±0.24  |
| UDP-GlcNAc:betaGal beta-1,3-N-acetylglucosaminyltransferase-like 1                                     | B3gnt1                       | 0.24±0.08  |
| UDP-glucose dehydrogenase                                                                              | Ugdh                         | 6.88±1.27  |
| UDP-glucose pyrophosphorylase 2                                                                        | Ugp2                         | 27.11±0    |
| UDP-glucuronate decarboxylase 1                                                                        | Uxs1                         | 1.11±0.17  |
| UDP-N-acetyl-alpha-D-galactosamine:polypeptide N-acetylglucosaminyltransferase 1                       | Galnt1                       | 2.09±0.1   |
| UDP-N-acetyl-alpha-D-galactosamine:polypeptide N-acetylglucosaminyltransferase 11                      | Galnt11                      | 0.58±0.14  |
| UDP-N-acetyl-alpha-D-galactosamine:polypeptide N-acetylglucosaminyltransferase 13                      | Galnt13                      | 0.24±0.06  |
| UDP-N-acetyl-alpha-D-galactosamine:polypeptide N-acetylglucosaminyltransferase 2 (predicted)           | Galnt2_predicted             | 4.02±0.06  |
| UDP-N-acetyl-alpha-D-galactosamine:polypeptide N-acetylglucosaminyltransferase-like 4 (predicted)      | Galnt4_predicted             | 6.4±1.24   |
| UDP-N-acetylglucosamine pyrophosphorylase 1                                                            | Uap1                         | 1.3±0.54   |
| UDP-N-acetylglucosamine pyrophosphorylase 1-like 1 (predicted)                                         | Uap111_predicted             | 4.81±0.95  |
| UFM1-specific peptidase 2                                                                              | Ufsp2                        | 3.86±1.41  |
| UHRF1 (ICBP90) binding protein 1-like                                                                  | Uhrf1bp1l                    | 3.87±0.58  |
| UNC homeobox                                                                                           | Uncx                         | 0.78±0.06  |
| UNC-119 homolog (C. elegans)                                                                           | Unc119                       | 0.73±0.08  |
| unc-119 homolog B (C. elegans)                                                                         | Unc119b                      | 6.16±0.21  |
| unc-13 homolog B (C. elegans)                                                                          | Unc13b                       | 0.39±0     |
| unc-45 homolog A (C. elegans)                                                                          | Unc45a                       | 1.98±0.82  |
| unc-5 homolog C (C. elegans)-like                                                                      | Unc5cl                       | 0.34±0.13  |
| unc-5 homolog D (C. elegans) (predicted)                                                               | Unc5d_predicted              | 1.58±0.21  |
| unc-50 homolog (C. elegans)                                                                            | Unc50                        | 4.75±0.89  |
| Unc-51 like kinase 1 (C. elegans)                                                                      | Ulk1                         | 2.71±0.45  |
| Unc-51 like kinase 2 (C. elegans) (predicted)                                                          | Ulk2_predicted               | 0.47±0.5   |
| unc-84 homolog B (C. elegans)                                                                          | Unc84b                       | 3.52±1.38  |
| unconventional SNARE in the ER 1 homolog (S. cerevisiae)                                               | LOC292282 /// Use1           | 5.29±0.94  |
| UPF3 regulator of nonsense transcripts homolog A (yeast)                                               | Upf3a                        | 1.47±0.29  |
| UPF3 regulator of nonsense transcripts homolog B (yeast) (predicted)                                   | Upf3b_predicted              | 3.07±0.23  |
| upregulated during skeletal muscle growth 5                                                            | Usmg5                        | 51.12±0.94 |
| up-regulated gene 4                                                                                    | Urg4                         | 0.9±0.02   |
| up-regulator of carnitine transporter, OCTN2                                                           | LOC303140                    | 0.61±0.1   |
| upstream binding protein 1 (predicted)                                                                 | Ubp1_predicted               | 2.63±0.47  |
| upstream binding transcription factor, RNA polymerase I                                                | Ubtf                         | 1.47±0.11  |
| upstream transcription factor 1                                                                        | Usf1                         | 0.61±0.03  |
| upstream transcription factor 2                                                                        | Usf2                         | 2.2±0.15   |
| uracil-DNA glycosylase                                                                                 | Unq                          | 4.22±0.2   |
| uridine monophosphate synthetase                                                                       | Umps                         | 3.44±1.09  |
| uridine phosphorylase 1                                                                                | Upp1                         | 1.74±0.22  |

|                                                                                                                |                     |            |
|----------------------------------------------------------------------------------------------------------------|---------------------|------------|
| uridine-cytidine kinase 1 (predicted)                                                                          | Uck1_predicted      | 2.96±0.34  |
| uridine-cytidine kinase 1-like 1                                                                               | Uck1                | 2.12±0.19  |
| uridine-cytidine kinase 2                                                                                      | Uck2                | 0.78±0.47  |
| uromodulin                                                                                                     | Umod                | 71.52±5.82 |
| uroplakin 1A                                                                                                   | Upk1a               | 0.64±0.6   |
| uroporphyrinogen decarboxylase                                                                                 | Urod                | 7.62±1.07  |
| USO1 homolog, vesicle docking protein (yeast)                                                                  | Uso1                | 2.63±0.42  |
| USP6 N-terminal like (predicted)                                                                               | Usp6nl_predicted    | 0.77±0.18  |
| UTP14, U3 small nucleolar ribonucleoprotein, homolog A (yeast)                                                 | Utp14a              | 1.35±0.16  |
| UTP15, U3 small nucleolar ribonucleoprotein, homolog (yeast)                                                   | Utp15               | 0.53±0.07  |
| UTP18, small subunit (SSU) processome component, homolog (yeast)                                               | Utp18               | 0.21±0.14  |
| UTP20, small subunit (SSU) processome component, homolog (yeast)                                               | Utp20               | 0.36±0.03  |
| UTP3, small subunit (SSU) processome component, homolog (S. cerevisiae)                                        | Utp3                | 2.17±0.13  |
| UTP6, small subunit (SSU) processome component, homolog (yeast)                                                | Utp6                | 0.36±0.35  |
| Utrophin                                                                                                       | Utrn                | 0.72±0.25  |
| Vac14 homolog (S. cerevisiae)                                                                                  | Vac14               | 1.29±0.01  |
| vaccinia related kinase 1                                                                                      | Vrk1                | 0.7±0.16   |
| vaccinia related kinase 3                                                                                      | Vrk3                | 2.85±0.17  |
| vacuolar protein sorting 11 (yeast) (predicted)                                                                | Vps11_predicted     | 1.75±0.02  |
| vacuolar protein sorting 13D (yeast) (predicted)                                                               | Vps13d_predicted    | 0.7±0.1    |
| vacuolar protein sorting 16 (yeast)                                                                            | Vps16               | 0.61±0.25  |
| vacuolar protein sorting 18 (yeast) (predicted)                                                                | Vps18_predicted     | 0.33±0.18  |
| vacuolar protein sorting 25 homolog (S. cerevisiae)                                                            | Vps25               | 5.54±0.96  |
| Vacuolar protein sorting 26 (yeast)                                                                            | Vps26               | 2.63±0.92  |
| vacuolar protein sorting 26 homolog A (yeast)                                                                  | Vps26a              | 1.58±0.26  |
| vacuolar protein sorting 28 (yeast) (predicted)                                                                | Vps28_predicted     | 4.26±0.06  |
| vacuolar protein sorting 29 (S. pombe) (predicted)                                                             | Vps29_predicted     | 8.19±1.57  |
| vacuolar protein sorting 33A (yeast)                                                                           | Vps33a              | 0.76±0.15  |
| vacuolar protein sorting 33B (yeast)                                                                           | Vps33b              | 0.63±0.04  |
| vacuolar protein sorting 35                                                                                    | Vps35               | 7.57±1.18  |
| vacuolar protein sorting 36 (yeast) (predicted)                                                                | Vps36_predicted     | 0.99±0.14  |
| vacuolar protein sorting 37 homolog A (S. cerevisiae)                                                          | Vps37a              | 0.75±0.28  |
| vacuolar protein sorting 37B (yeast) (predicted)                                                               | Vps37b_predicted    | 1.22±0.24  |
| vacuolar protein sorting 37C (yeast) (predicted)                                                               | Vps37c_predicted    | 1.35±0.39  |
| vacuolar protein sorting 39 (yeast)                                                                            | Vps39               | 0.57±0.07  |
| vacuolar protein sorting 45 (yeast)                                                                            | Vps45               | 0.82±0.07  |
| vacuolar protein sorting 4a (yeast)                                                                            | Vps4a               | 3.24±0.07  |
| vacuolar protein sorting 4b (yeast)                                                                            | Vps4b               | 3.58±0.37  |
| vacuolar protein sorting 52 (yeast)                                                                            | Vps52               | 0.58±0.3   |
| vacuolar protein sorting 53 (yeast) (predicted)                                                                | Vps53_predicted     | 1.18±0.28  |
| vacuolar protein sorting 54 (yeast)                                                                            | Vps54               | 2.63±0.82  |
| vacuolar protein sorting 72 (yeast) (predicted)                                                                | Vps72_predicted     | 1.63±0.25  |
| vacuolar protein sorting 8 homolog (S. cerevisiae)                                                             | Vps8                | 1.95±0.38  |
| valosin containing protein (p97)/p47 complex interacting protein 1                                             | Vcip1               | 0.94±0.36  |
| valosin-containing protein                                                                                     | Vcp                 | 8.45±0.96  |
| vang-like 1 (van gogh, Drosophila)                                                                             | Vangl1              | 0.38±0.26  |
| vascular endothelial growth factor A                                                                           | Vegfa               | 13.23±2.49 |
| vascular endothelial growth factor B                                                                           | Vegfb               | 4.51±0.22  |
| vascular endothelial zinc finger 1 (predicted)                                                                 | VeZF1_predicted     | 2.07±0.44  |
| vasodilator-stimulated phosphoprotein (predicted)                                                              | Vasp_predicted      | 2.56±0.25  |
| vasohibin 1                                                                                                    | Vash1               | 0.54±0.08  |
| vasorin                                                                                                        | Vasn                | 0.82±0.05  |
| VATPase, H+ transporting, lysosomal V1 subunit E1                                                              | Atp6v1e1            | 14.79±0.87 |
| vav 3 oncogene                                                                                                 | Vav3                | 9.51±1.75  |
| Vav2 oncogene (predicted)                                                                                      | Vav2_predicted      | 0.85±0.06  |
| v-crk sarcoma virus CT10 oncogene homolog (avian)                                                              | Crk                 | 0.59±0.15  |
| v-crk sarcoma virus CT10 oncogene homolog (avian)-like                                                         | Crkl                | 0.37±0.05  |
| ventricular zone expressed PH domain homolog 1 (zebrafish) /// similar to VEPH isoform A (predicted)           | RGD1565184_predicte | 3.55±1.51  |
| v-erb-b2 erythroblastic leukemia viral oncogene homolog 2, neuro/glioblastoma derived oncogene homolog (avian) | ErbB2               | 1.83±0.19  |
| versican                                                                                                       | Vcan                | 1.42±0.54  |
| very low density lipoprotein receptor                                                                          | Vldlr               | 0.5±0.06   |
| vesicle amine transport protein 1 homolog (T. californica)                                                     | Vat1                | 1.1±0.32   |
| vesicle transport through interaction with t-SNAREs homolog 1A (yeast)                                         | Vti1a               | 0.32±0.01  |
| vesicle-associated membrane protein 1                                                                          | Vamp1               | 0.45±0.05  |
| vesicle-associated membrane protein 2                                                                          | Vamp2               | 1.29±0.11  |
| vesicle-associated membrane protein 3                                                                          | Vamp3               | 3.09±0.13  |
| vesicle-associated membrane protein 5                                                                          | Vamp5               | 2.25±0.17  |
| vesicle-associated membrane protein 7                                                                          | Vamp7               | 4.31±0.52  |
| vesicle-associated membrane protein 8                                                                          | Vamp8               | 12.25±1    |
| vesicle-associated membrane protein, associated protein a                                                      | Vapa                | 25.88±0.89 |
| vesicle-associated membrane protein, associated protein B and C                                                | Vapb                | 4.11±0.13  |
| vestigial like 4 (Drosophila)                                                                                  | Vgll4               | 2.51±0.03  |
| vezatin, adherens junctions transmembrane protein                                                              | VeZt                | 0.28±0.13  |
| villin 2                                                                                                       | Vil2                | 8.31±2.61  |
| villin-like (predicted)                                                                                        | Vil_predicted       | 0.61±0.35  |
| vinculin (predicted)                                                                                           | Vcl_predicted       | 1.58±0.88  |
| virus-induced signaling adapter                                                                                | Visa                | 5.06±0.87  |
| vitamin D receptor                                                                                             | Vdr                 | 0.25±0.01  |
| vitamin K epoxide reductase complex, subunit 1                                                                 | Vkorc1              | 9.13±1.19  |
| vitamin K epoxide reductase complex, subunit 1-like 1                                                          | Vkorc11             | 0.24±0.01  |
| v-Ki-ras2 Kirsten rat sarcoma viral oncogene homolog                                                           | Kras                | 4.82±0.78  |
| v-maf musculoaponeurotic fibrosarcoma oncogene family, protein K (avian)                                       | Mafk                | 0.59±0.89  |
| voltage-dependent anion channel 1                                                                              | Vdac1               | 20.97±1.55 |
| voltage-dependent anion channel 2                                                                              | Vdac2               | 33.52±0.81 |
| voltage-dependent anion channel 3                                                                              | Vdac3               | 34.95±8.38 |
| von Hippel-Lindau tumor suppressor                                                                             | Vhl                 | 5.79±0.47  |
| Vps20-associated 1 homolog (S. cerevisiae)                                                                     | Vta1                | 2.97±0.42  |



|                                                                                                          |                       |            |
|----------------------------------------------------------------------------------------------------------|-----------------------|------------|
| v-raf murine sarcoma 3611 viral oncogene homolog                                                         | Araf                  | 2.48±0.6   |
| v-raf-1 murine leukemia viral oncogene homolog 1                                                         | Raf1                  | 4.33±1.32  |
| v-ral simian leukemia viral oncogene homolog A (ras related)                                             | Rala                  | 1.71±0.4   |
| v-ral simian leukemia viral oncogene homolog B (ras related)                                             | Ralb                  | 2.62±0.39  |
| v-rel reticuloendotheliosis viral oncogene homolog A (avian)                                             | Rela                  | 1.47±0.64  |
| WAP four-disulfide core domain 1                                                                         | Wfdc1                 | 0.83±0.12  |
| WAP four-disulfide core domain 10                                                                        | Wfdc10                | 1.95±0.4   |
| WAP four-disulfide core domain 2                                                                         | Wfdc2                 | 15.59±0.67 |
| WAS protein homology region 2 domain containing 1                                                        | Whdc1                 | 0.57±0.08  |
| WAS/WASL interacting protein family, member 1                                                            | Wipf1                 | 0.88±0.05  |
| WAS/WASL interacting protein family, member 3                                                            | Wipf3                 | 0.2±0.18   |
| WD and tetratricopeptide repeats 1 (predicted)                                                           | Wdtrc1_predicted      | 1.23±0.05  |
| WD repeat and FYVE domain containing 1                                                                   | Wdfy1                 | 0.64±0.88  |
| WD repeat and FYVE domain containing 2 (predicted)                                                       | Wdfy2_predicted       | 4.49±0.19  |
| WD repeat and FYVE domain containing 3 (predicted)                                                       | Wdfy3_predicted       | 5.32±0.11  |
| WD repeat and HMG-box DNA binding protein 1 (predicted)                                                  | Wdhd1_predicted       | 0.29±0.16  |
| WD repeat and SOCS box-containing 1                                                                      | Wsb1                  | 0.25±0.07  |
| WD repeat and SOCS box-containing 2                                                                      | Wsb2                  | 4.49±1.49  |
| WD repeat domain 1                                                                                       | Wdr1                  | 6.71±0.71  |
| WD repeat domain 12                                                                                      | Wdr12                 | 0.21±0.08  |
| WD repeat domain 13 (predicted)                                                                          | Wdr13_predicted       | 3.15±0.56  |
| WD repeat domain 18                                                                                      | Wdr18                 | 0.81±0.01  |
| WD repeat domain 19 (predicted)                                                                          | Wdr19_predicted       | 0.76±0.14  |
| WD repeat domain 20                                                                                      | Wdr20                 | 0.36±0.29  |
| WD repeat domain 20a                                                                                     | Wdr20a                | 0.76±0.24  |
| WD repeat domain 21 (predicted)                                                                          | Wdr21_predicted       | 1.05±0.06  |
| WD repeat domain 22                                                                                      | Wdr22                 | 0.34±0.2   |
| WD repeat domain 23                                                                                      | Wdr23                 | 7.3±0.94   |
| WD repeat domain 24                                                                                      | Wdr24                 | 0.8±0.06   |
| WD repeat domain 25 /// similar to pre-mRNA splicing factor-like (predicted)                             | RGD1562505_predicte   | 0.26±0.23  |
| WD repeat domain 26                                                                                      | Wdr26                 | 2.56±0.06  |
| WD repeat domain 3 (predicted)                                                                           | Wdr3_predicted        | 0.56±0.3   |
| WD repeat domain 31                                                                                      | Wdr31                 | 0.57±0.03  |
| WD repeat domain 32 (predicted)                                                                          | Wdr32_predicted       | 0.34±0.09  |
| WD repeat domain 33 (predicted)                                                                          | Wdr33_predicted       | 1.2±0      |
| WD repeat domain 34                                                                                      | Wdr34                 | 1.36±0.3   |
| WD repeat domain 36 (predicted)                                                                          | Wdr36_predicted       | 0.84±0.53  |
| WD repeat domain 37 (predicted)                                                                          | Wdr37_predicted       | 1.91±0.21  |
| WD repeat domain 41 (predicted)                                                                          | Wdr41_predicted       | 0.56±0     |
| WD repeat domain 42A                                                                                     | Wdr42a                | 1.8±0.41   |
| WD repeat domain 43                                                                                      | Wdr43                 | 0.75±0.15  |
| WD repeat domain 45                                                                                      | Wdr45                 | 4.24±0.74  |
| WD repeat domain 47                                                                                      | Wdr47                 | 0.6±0.02   |
| WD repeat domain 48 (predicted)                                                                          | Wdr48_predicted       | 0.73±0.21  |
| WD repeat domain 5                                                                                       | Wdr5                  | 1.53±0.24  |
| WD repeat domain 59                                                                                      | Wdr59                 | 6.95±1.4   |
| WD repeat domain 5B                                                                                      | Wdr5b                 | 0.41±0.15  |
| WD repeat domain 6                                                                                       | Wdr6                  | 2.6±0.25   |
| WD repeat domain 61                                                                                      | Wdr61                 | 6.81±0.87  |
| WD repeat domain 67                                                                                      | Wdr67                 | 0.92±0.34  |
| WD repeat domain 68 (predicted)                                                                          | Wdr68_predicted       | 5.14±1.49  |
| WD repeat domain 70                                                                                      | Wdr70                 | 1.02±0.47  |
| WD repeat domain 75                                                                                      | Wdr75                 | 0.32±0.34  |
| WD repeat domain 77                                                                                      | Wdr77                 | 2.15±0.45  |
| WD repeat domain 79                                                                                      | Wdr79                 | 0.6±0.01   |
| WD repeat domain 81                                                                                      | Wdr81                 | 0.7±0.15   |
| WD repeat domain 89                                                                                      | Wdr89                 | 0.28±0.05  |
| WD repeat domain, phosphoinositide interacting 1 (predicted)                                             | Wipi1_predicted       | 0.48±0.44  |
| WD repeat domain, phosphoinositide interacting 2                                                         | Wipi2                 | 1.5±0.35   |
| WD repeat, SAM and U-box domain containing 1                                                             | Wdsub1                | 1.83±0.03  |
| WD repeats and SOF domain containing 1 (predicted)                                                       | Wdsof1_predicted      | 3±1.26     |
| Wdr45 like (predicted)                                                                                   | Wdr45l_predicted      | 2.6±0.57   |
| wee 1 homolog (S. pombe)                                                                                 | Wee1                  | 0.25±0.06  |
| Werner helicase interacting protein 1                                                                    | Wrnip1                | 2.07±0.23  |
| widely-interspaced zinc finger motifs (predicted)                                                        | Wiz_predicted         | 0.43±0.3   |
| Williams Beuren syndrome chromosome region 22                                                            | LOC368084 /// Wbscr2: | 1.11±0.45  |
| Williams Beuren syndrome chromosome region 27                                                            | Wbscr27               | 0.43±0.08  |
| Williams-Beuren syndrome chromosome region 16 homolog (human) (predicted)                                | Wbscr16_predicted     | 0.42±0     |
| Williams-Beuren syndrome chromosome region 18 /// similar to Williams-Beuren syndrome critical region 18 | LOC680976 /// Wbscr1: | 2.16±0.23  |
| Wilms' tumour 1-associating protein                                                                      | Wtap                  | 7.2±1.24   |
| wingless related MMTV integration site 10a (predicted)                                                   | Wnt10a_predicted      | 1.06±0.14  |
| Wiskott-Aldrich syndrome-like (human)                                                                    | Wasl                  | 5.68±0.77  |
| WNK lysine deficient protein kinase 1                                                                    | Wnk1                  | 0.92±0.34  |
| WNK lysine deficient protein kinase 4                                                                    | Wnk4                  | 3.7±0.94   |
| Wnt inhibitory factor 1                                                                                  | Wif1                  | 0.35±0.1   |
| Wolf-Hirschhorn syndrome candidate 1 (human)                                                             | Whsc1                 | 0.61±0.12  |
| Wolf-Hirschhorn syndrome candidate 1-like 1 (predicted)                                                  | Whsc1l1_predicted     | 1.6±0.27   |
| Wolf-Hirschhorn syndrome candidate 2 (human)                                                             | Whsc2                 | 2.33±0.1   |
| Wolfram syndrome 1 homolog (human)                                                                       | Wfs1                  | 0.68±0.35  |
| WSC domain containing 1                                                                                  | Wscd1                 | 2.92±0.49  |
| WT1-interacting protein (predicted)                                                                      | Wtip_predicted        | 0.85±0.51  |
| WW domain binding protein 1                                                                              | Wbp1                  | 6.65±1.51  |
| WW domain binding protein 11                                                                             | Wbp11                 | 1.41±0.52  |
| WW domain binding protein 2                                                                              | Wbp2                  | 1.38±0.07  |
| WW domain binding protein 4                                                                              | Wbp4                  | 0.92±0.42  |
| WW domain binding protein 5 (predicted)                                                                  | Wbp5_predicted        | 18.51±0.02 |
| WW domain binding protein 7                                                                              | Wbp7                  | 1.28±0.31  |

|                                                                                       |                   |            |
|---------------------------------------------------------------------------------------|-------------------|------------|
| WW domain containing E3 ubiquitin protein ligase 2 (predicted)                        | Wwp2_predicted    | 0.91±0.16  |
| WW domain containing transcription regulator 1                                        | Wwtr1             | 0.39±0.01  |
| WW, C2 and coiled-coil domain containing 1                                            | Wwc1              | 3.6±0.2    |
| WW, C2 and coiled-coil domain containing 2                                            | Wwc2              | 3.49±0.07  |
| X Kell blood group precursor-related family, member 5                                 | Xkr5              | 0.25±0.17  |
| X-box binding protein 1                                                               | Xbp1              | 10.04±3.65 |
| Xenotropic and polytropic retrovirus receptor 1 (predicted)                           | Xpr1_predicted    | 1.96±0.11  |
| xeroderma pigmentosum, complementation group A (predicted)                            | Xpa_predicted     | 0.79±0.04  |
| xeroderma pigmentosum, complementation group C (predicted)                            | Xpc_predicted     | 0.72±0.02  |
| xin actin-binding repeat containing 1                                                 | Xirp1             | 0.21±0.09  |
| X-linked myotubular myopathy gene 1                                                   | Mtm1              | 0.76±0.15  |
| XPA binding protein 2                                                                 | Xab2              | 0.98±0.17  |
| X-prolyl aminopeptidase (aminopeptidase P) 1, soluble                                 | Xpnpep1           | 3.46±1.22  |
| X-ray repair complementing defective repair in Chinese hamster cells 1                | Xrcc1             | 1.39±0.16  |
| X-ray repair complementing defective repair in Chinese hamster cells 4                | Xrcc4             | 0.48±0.01  |
| X-ray repair complementing defective repair in Chinese hamster cells 5                | Xrcc5             | 0.93±0.19  |
| X-ray repair complementing defective repair in Chinese hamster cells 6                | Xrcc6             | 0.88±0.04  |
| XRCC6 binding protein 1                                                               | Xrcc6bp1          | 9.87±0.48  |
| XTP3-transactivated protein A                                                         | Xtp3tpa           | 1.78±0     |
| xylosylprotein beta1,4-galactosyltransferase, polypeptide 7 (galactosyltransferase I) | B4gal7            | 0.41±0     |
| xylosyltransferase II                                                                 | Xylt2             | 0.99±0.38  |
| xylulokinase homolog (H. influenzae)                                                  | Xylb              | 3.49±0.17  |
| Y box protein 1                                                                       | Ybx1              | 35.65±0.52 |
| Y box protein 2 (predicted)                                                           | Ybx2_predicted    | 1.32±0.21  |
| YEATS domain containing 2                                                             | Yeats2            | 0.9±0.29   |
| YEATS domain containing 4 (predicted)                                                 | Yeats4_predicted  | 2.47±0.58  |
| Yip1 domain family, member 1                                                          | Yipf1             | 3.86±0.15  |
| Yip1 domain family, member 2                                                          | Yipf2             | 0.52±0.15  |
| Yip1 domain family, member 3                                                          | Yipf3             | 0.69±0.47  |
| Yip1 domain family, member 4                                                          | Yipf4             | 4.37±0.15  |
| Yip1 domain family, member 5                                                          | Yipf5             | 5.56±2.07  |
| Yip1 interacting factor homolog (S. cerevisiae)                                       | Yif1              | 4.02±1.13  |
| yippee-like 5 (Drosophila)                                                            | Ypel5             | 6.59±0.83  |
| YKT6 homolog (S. Cerevisiae)                                                          | Ykt6              | 0.35±0.05  |
| YLP motif containing 1                                                                | Ylpm1             | 1.19±0.3   |
| YME1-like 1 (S. cerevisiae)                                                           | Yme111            | 3.65±0.42  |
| yrdC domain containing (E.coli)                                                       | Yrdc              | 0.7±0.19   |
| YTH domain family 1                                                                   | Ythdf1            | 2.49±0.33  |
| YTH domain family 2 (predicted)                                                       | Ythdf2_predicted  | 1.95±0.25  |
| YTH domain family 3 (predicted)                                                       | Ythdf3_predicted  | 3.59±0.74  |
| YY1 transcription factor                                                              | Yy1               | 3.83±0.49  |
| zer-1 homolog (C. elegans)                                                            | Zer1              | 1.48±0.41  |
| zinc and ring finger 1 (predicted)                                                    | Znrf1_predicted   | 11.62±0.68 |
| zinc binding alcohol dehydrogenase, domain containing 1                               | Zadh1             | 10.62±1.75 |
| zinc binding alcohol dehydrogenase, domain containing 2 (predicted)                   | Zadh2_predicted   | 1.64±0.04  |
| zinc finger (CCCH type), RNA binding motif and serine/arginine rich 2                 | Zrsr2             | 0.27±0.26  |
| zinc finger and BTB domain containing 1                                               | Zbtb1             | 0.61±0.59  |
| zinc finger and BTB domain containing 11 (predicted)                                  | Zbtb11_predicted  | 2.78±0.99  |
| zinc finger and BTB domain containing 17                                              | Zbtb17            | 1.68±0.11  |
| zinc finger and BTB domain containing 20 (predicted)                                  | Zbtb20_predicted  | 1.92±0.76  |
| zinc finger and BTB domain containing 24 (predicted)                                  | Zbtb24_predicted  | 0.26±0.04  |
| zinc finger and BTB domain containing 4 (predicted)                                   | Zbtb4_predicted   | 3.07±0.89  |
| zinc finger and BTB domain containing 41 homolog                                      | Zbtb41            | 1.14±0.02  |
| zinc finger and BTB domain containing 43                                              | Zbtb43            | 0.93±0.15  |
| zinc finger and BTB domain containing 44                                              | Zbtb44            | 0.63±0.19  |
| zinc finger and BTB domain containing 45                                              | Zbtb45            | 1.63±0.48  |
| zinc finger and BTB domain containing 5 (predicted)                                   | Zbtb5_predicted   | 0.96±0     |
| zinc finger and BTB domain containing 6                                               | Zbtb6             | 0.33±0.02  |
| zinc finger and BTB domain containing 7a                                              | Zbtb7a            | 1.41±0.05  |
| zinc finger and BTB domain containing 7B (predicted)                                  | Zbtb7b_predicted  | 0.32±0.17  |
| zinc finger and BTB domain containing 8 (predicted)                                   | Zbtb8_predicted   | 0.69±0.03  |
| zinc finger and BTB domain containing 8 opposite strand (predicted)                   | Zbtb8os_predicted | 2.46±0.19  |
| zinc finger and BTB domain containing 9                                               | Zbtb9             | 0.48±0.31  |
| zinc finger and SCAN domain containing 21                                             | Zscan21           | 0.83±0.17  |
| zinc finger and SCAN domains 20                                                       | Zscan20           | 0.27±0.03  |
| zinc finger CCCH type containing 10                                                   | Zc3h10            | 0.52±0.19  |
| zinc finger CCCH type containing 13                                                   | Zc3h13            | 0.46±0.09  |
| zinc finger CCCH type containing 14                                                   | Zc3h14            | 2.73±0.07  |
| zinc finger CCCH type containing 6 (predicted)                                        | Zc3h6_predicted   | 0.59±0.06  |
| zinc finger CCCH type containing 7 A (predicted)                                      | Zc3h7a_predicted  | 1.64±0.37  |
| zinc finger CCCH type containing 8                                                    | Zc3h8             | 1.09±0.17  |
| zinc finger CCCH-type containing 15                                                   | Zc3h15            | 4.54±0.23  |
| zinc finger CCCH-type containing 7B (predicted)                                       | Zc3h7b_predicted  | 1.91±0.26  |
| zinc finger CCHC-type and RNA binding motif 1                                         | Zcrb1             | 1.33±0.11  |
| zinc finger homeobox 3 (predicted)                                                    | Zfhx3_predicted   | 0.82±0.19  |
| zinc finger protein 105                                                               | Zfp105            | 0.69±0.22  |
| zinc finger protein 110                                                               | Zfp110            | 1.92±0.67  |
| zinc finger protein 111                                                               | Zfp111            | 0.39±0.28  |
| zinc finger protein 124 (HZF-16) (predicted)                                          | Znf124_predicted  | 0.45±0.22  |
| zinc finger protein 128                                                               | Zfp128            | 0.23±0.22  |
| zinc finger protein 131                                                               | Zfp131            | 0.39±0.36  |
| zinc finger protein 142 (clone pHZ-49) (predicted)                                    | Znf142_predicted  | 0.53±0.09  |
| zinc finger protein 143                                                               | Zfp143            | 0.5±0.35   |
| zinc finger protein 148                                                               | Zfp148            | 3.29±0.11  |
| zinc finger protein 157                                                               | Zfp157            | 0.6±0.19   |
| zinc finger protein 161                                                               | Zfp161            | 0.47±0.01  |
| zinc finger protein 180                                                               | Zfp180            | 2.55±0.33  |

|                                                                                   |                      |            |
|-----------------------------------------------------------------------------------|----------------------|------------|
| zinc finger protein 189 (predicted)                                               | Zfp189_predicted     | 0.74±0.18  |
| zinc finger protein 191                                                           | Zfp191               | 0.72±0.38  |
| zinc finger protein 202                                                           | Zfp202               | 0.37±0.1   |
| zinc finger protein 207                                                           | Zfp207               | 3.05±1.1   |
| Zinc finger protein 212                                                           | Zfp212               | 1.62±0.67  |
| zinc finger protein 213 (predicted)                                               | Znf213_predicted     | 1.1±0.26   |
| zinc finger protein 213 (predicted) /// similar to Caspase-14 precursor (CASP-14) | LOC679178 /// LOC680 | 0.4±0.08   |
| zinc finger protein 219                                                           | Zfp219               | 3.15±1.09  |
| zinc finger protein 259                                                           | Zfp259               | 3.05±0.12  |
| zinc finger protein 260                                                           | Zfp260               | 3.75±0.33  |
| zinc finger protein 278                                                           | Zfp278               | 1.24±0.07  |
| zinc finger protein 281                                                           | Zfp281               | 1.03±0.08  |
| zinc finger protein 282 (predicted)                                               | Zfp282_predicted     | 0.62±0.11  |
| zinc finger protein 289                                                           | Zfp289               | 2.27±0.03  |
| zinc finger protein 291                                                           | Znf291               | 1.15±0.08  |
| zinc finger protein 292                                                           | Zfp292               | 0.27±0.39  |
| zinc finger protein 294                                                           | Zfp294               | 2.24±0.42  |
| zinc finger protein 297                                                           | Zfp297               | 0.52±0.11  |
| zinc finger protein 313                                                           | Zfp313               | 1.7±0.7    |
| zinc finger protein 316 (predicted)                                               | Zfp316_predicted     | 0.33±0.03  |
| zinc finger protein 330 (predicted)                                               | Zfp330_predicted     | 4.79±1.19  |
| zinc finger protein 335                                                           | Zfp335               | 0.78±0.17  |
| zinc finger protein 346 (predicted)                                               | Zfp346_predicted     | 0.42±0.01  |
| zinc finger protein 347                                                           | Zfp347               | 0.56±0.13  |
| zinc finger protein 354A                                                          | Zfp354a              | 0.38±0.07  |
| zinc finger protein 358 (predicted)                                               | Zfp358_predicted     | 1.29±0.38  |
| zinc finger protein 36                                                            | Zfp36                | 10.71±6.43 |
| zinc finger protein 36, C3H type-like 1                                           | Zfp361               | 21.03±3.68 |
| zinc finger protein 36, C3H type-like 2                                           | Zfp362               | 5.47±0.82  |
| zinc finger protein 362 /// zinc finger and SCAN domains 20                       | Zfp362 /// Zscan20   | 2.85±0.3   |
| zinc finger protein 364 (predicted)                                               | Zfp364_predicted     | 3.33±1.23  |
| zinc finger protein 367                                                           | Zfp367               | 1.93±0.1   |
| zinc finger protein 384                                                           | Zfp384               | 2.52±0.28  |
| zinc finger protein 386 (Kruppel-like)                                            | Zfp386               | 2.32±0.09  |
| zinc finger protein 395 (predicted)                                               | Zfp395_predicted     | 2.42±0.29  |
| zinc finger protein 40                                                            | Zfp40                | 0.26±0.15  |
| zinc finger protein 407                                                           | Zfp407               | 0.25±0.03  |
| zinc finger protein 410 (predicted)                                               | Zfp410_predicted     | 1.45±0.06  |
| zinc finger protein 414                                                           | Zfp414               | 1.74±0.23  |
| zinc finger protein 422                                                           | Zfp422               | 2.8±0.13   |
| zinc finger protein 426                                                           | Zfp426               | 0.76±0.11  |
| zinc finger protein 444 (predicted)                                               | Zfp444_predicted     | 0.79±0.07  |
| zinc finger protein 445                                                           | Zfp445               | 1.55±0.02  |
| zinc finger protein 446 (predicted)                                               | Zfp446_predicted     | 0.69±0.09  |
| zinc finger protein 451                                                           | Zfp451               | 0.65±0.27  |
| zinc finger protein 455                                                           | Zfp455               | 0.33±0     |
| zinc finger protein 46 (predicted)                                                | Zfp46_predicted      | 1.04±0.18  |
| zinc finger protein 462                                                           | Zfp462               | 1.37±0.09  |
| zinc finger protein 467                                                           | Zfp467               | 2.2±0.48   |
| zinc finger protein 469 (predicted)                                               | Zfp469_predicted     | 0.58±0.18  |
| zinc finger protein 503 (predicted)                                               | Zfp503_predicted     | 8.77±3.52  |
| Zinc finger protein 507 (predicted)                                               | Znf507_predicted     | 1.37±0.13  |
| zinc finger protein 509 (predicted)                                               | Zfp509_predicted     | 0.2±0.02   |
| zinc finger protein 511                                                           | Zfp511               | 0.24±0.08  |
| zinc finger protein 512                                                           | Zfp512               | 0.88±0.42  |
| zinc finger protein 512B                                                          | Znf512b              | 1.12±0.04  |
| zinc finger protein 513                                                           | Zfp513               | 1.55±0.15  |
| zinc finger protein 524                                                           | Zfp524               | 1.38±0.26  |
| zinc finger protein 532 (predicted)                                               | Znf532_predicted     | 0.41±0.32  |
| zinc finger protein 533 (predicted)                                               | Zfp533_predicted     | 1.68±0.29  |
| zinc finger protein 541                                                           | Zfp541               | 1.93±0.34  |
| zinc finger protein 553                                                           | Zfp553               | 1.55±0.29  |
| zinc finger protein 553 /// zinc finger protein 771                               | Zfp553 /// Zfp771    | 3.66±0.79  |
| zinc finger protein 574                                                           | Zfp574               | 1.27±0     |
| zinc finger protein 579                                                           | Zfp579               | 0.49±0.06  |
| zinc finger protein 580 (predicted)                                               | Zfp580_predicted     | 1.74±0.4   |
| zinc finger protein 592 (predicted)                                               | Zfp592_predicted     | 0.66±0.06  |
| zinc finger protein 598 (predicted)                                               | Zfp598_predicted     | 1.14±0.2   |
| zinc finger protein 609                                                           | Zfp609               | 0.2±0.18   |
| zinc finger protein 61                                                            | Zfp61                | 0.76±0.24  |
| zinc finger protein 612 (predicted)                                               | Zfp612_predicted     | 0.51±0.05  |
| zinc finger protein 618 (predicted)                                               | Znf618_predicted     | 3.08±0.08  |
| zinc finger protein 622                                                           | Zfp622               | 1.32±0.25  |
| zinc finger protein 629                                                           | Zfp629               | 1.49±0.37  |
| Zinc finger protein 637                                                           | Zfp637               | 3.64±0.02  |
| zinc finger protein 64                                                            | Zfp64                | 0.32±0.09  |
| zinc finger protein 644 (predicted)                                               | Zfp644_predicted     | 2.25±0.41  |
| zinc finger protein 652                                                           | Zfp652               | 0.9±0.05   |
| zinc finger protein 653 (predicted)                                               | Zfp653_predicted     | 0.2±0.35   |
| zinc finger protein 654                                                           | Zfp654               | 1.08±0.42  |
| zinc finger protein 655                                                           | Zfp655               | 3.8±0.86   |
| zinc finger protein 667                                                           | Zfp667               | 0.64±0.13  |
| zinc finger protein 672                                                           | Zfp672               | 1.76±0.59  |
| zinc finger protein 68 (predicted)                                                | Zfp68_predicted      | 2.78±0.79  |
| zinc finger protein 688 (predicted)                                               | Zfp688_predicted     | 0.51±0.18  |
| zinc finger protein 691 (predicted)                                               | Zfp691_predicted     | 1.25±0.22  |
| zinc finger protein 692 (predicted)                                               | Zfp692_predicted     | 0.74±0     |

|                                                                                        |                    |            |
|----------------------------------------------------------------------------------------|--------------------|------------|
| zinc finger protein 703                                                                | Zfp703             | 0.39±0.09  |
| zinc finger protein 706                                                                | Zfp706             | 16.23±4.25 |
| zinc finger protein 709                                                                | Zfp709             | 0.25±0.18  |
| Zinc finger protein 710 (predicted)                                                    | Zfp710_predicted   | 0.26±0.16  |
| zinc finger protein 771                                                                | Zfp771             | 0.98±0.07  |
| zinc finger protein 775                                                                | Zfp775             | 0.51±0.12  |
| zinc finger protein 777                                                                | Zfp777             | 0.83±0.08  |
| zinc finger protein 787                                                                | Zfp787             | 2.46±0.3   |
| zinc finger protein 821                                                                | Zfp821             | 0.97±0.11  |
| zinc finger protein 828                                                                | Zfp828             | 1.71±0.37  |
| zinc finger protein 84 (predicted)                                                     | Zfp84_predicted    | 0.9±0.3    |
| zinc finger protein 91                                                                 | Zfp91              | 2.42±0.17  |
| zinc finger protein LOC100125361                                                       | rCG_64343          | 0.28±0.06  |
| zinc finger protein X-linked (predicted)                                               | Zfx_predicted      | 1.51±0.25  |
| zinc finger protein ZFP                                                                | LOC503192          | 1.37±0.23  |
| zinc finger RNA binding protein                                                        | Zfr                | 8.72±0.27  |
| zinc finger with KRAB and SCAN domains 1                                               | Zkscan1            | 0.29±0.22  |
| zinc finger with KRAB and SCAN domains 17                                              | Zkscan17           | 1.3±0.05   |
| zinc finger with KRAB and SCAN domains 3                                               | Zkscan3            | 3.29±1.1   |
| zinc finger with KRAB and SCAN domains 5                                               | Zkscan5            | 2.05±0.51  |
| zinc finger with KRAB and SCAN domains 6                                               | Zkscan6            | 0.75±0.13  |
| zinc finger with UFM1-specific peptidase domain                                        | Zufsp              | 0.99±0     |
| zinc finger, AN1-type domain 1                                                         | Zfand1             | 0.49±0.21  |
| zinc finger, AN1-type domain 3                                                         | Zfand3             | 2.28±0.11  |
| zinc finger, AN1-type domain 5                                                         | Zfand5             | 5.1±1.67   |
| zinc finger, AN1-type domain 6                                                         | Zfand6             | 12.47±0.01 |
| zinc finger, BED domain containing 3                                                   | Zbed3              | 1.84±0.1   |
| zinc finger, BED domain containing 4 (predicted)                                       | Zbed4_predicted    | 0.65±0.21  |
| zinc finger, C3HC-type 1 (predicted)                                                   | Zc3hc1_predicted   | 0.57±0.06  |
| zinc finger, CCCH-type with G patch domain /// Lck interacting transmembrane adaptor 1 | Lime1 /// Zgpat    | 0.58±0.11  |
| zinc finger, CCHC domain containing 10                                                 | Zcchc10            | 0.87±0.01  |
| zinc finger, CCHC domain containing 11 (predicted)                                     | Zcchc11_predicted  | 0.59±0.5   |
| zinc finger, CCHC domain containing 12                                                 | Zcchc12            | 0.27±0.18  |
| zinc finger, CCHC domain containing 17                                                 | Zcchc17            | 1.12±0     |
| Zinc finger, CCHC domain containing 7 (predicted)                                      | Zcchc7_predicted   | 0.28±0.16  |
| zinc finger, CCHC domain containing 9                                                  | Zcchc9             | 1.06±0.35  |
| Zinc finger, CW-type with coiled-coil domain 1 (predicted)                             | Zcwcc1_predicted   | 0.36±0.08  |
| zinc finger, DHHC domain containing 1                                                  | Zdhhc1             | 1.56±0.38  |
| zinc finger, DHHC domain containing 13                                                 | Zdhhc13            | 1.8±0.19   |
| zinc finger, DHHC domain containing 16                                                 | Zdhhc16            | 2.23±0.14  |
| zinc finger, DHHC domain containing 2                                                  | Zdhhc2             | 0.32±0.13  |
| zinc finger, DHHC domain containing 23                                                 | Zdhhc23            | 1.11±0.45  |
| Zinc finger, DHHC domain containing 3                                                  | Zdhhc3             | 1.67±0.22  |
| zinc finger, DHHC domain containing 4                                                  | Zdhhc4             | 1.94±0.47  |
| zinc finger, DHHC domain containing 5                                                  | Zdhhc5             | 2.34±0.63  |
| zinc finger, DHHC domain containing 6                                                  | Zdhhc6             | 3.87±0.23  |
| zinc finger, DHHC domain containing 7                                                  | Zdhhc7             | 2.52±0.44  |
| zinc finger, DHHC domain containing 8                                                  | Zdhhc8             | 0.92±0.3   |
| zinc finger, FYVE domain containing 1 (predicted)                                      | Zfyve1_predicted   | 0.58±0.25  |
| zinc finger, FYVE domain containing 16                                                 | Zfyve16            | 0.59±0.31  |
| zinc finger, FYVE domain containing 19                                                 | Zfyve19            | 1.04±0.14  |
| zinc finger, FYVE domain containing 20 (predicted)                                     | Zfyve20_predicted  | 0.81±0.13  |
| zinc finger, FYVE domain containing 21 (predicted)                                     | Zfyve21_predicted  | 5.03±0.09  |
| zinc finger, FYVE domain containing 26 (predicted)                                     | Zfyve26_predicted  | 1.21±0.21  |
| zinc finger, FYVE domain containing 27                                                 | Zfyve27            | 0.64±0.07  |
| zinc finger, FYVE domain containing 9 (predicted)                                      | Zfyve9_predicted   | 0.61±0.14  |
| zinc finger, HIT domain containing 1 (predicted)                                       | Znhit1_predicted   | 4.78±0.71  |
| zinc finger, HIT domain containing 2 (predicted)                                       | Znhit2_predicted   | 0.62±0.21  |
| zinc finger, HIT type 3                                                                | Znhit3             | 0.96±0.01  |
| zinc finger, matrin type 2                                                             | Zmat2              | 0.94±0.22  |
| zinc finger, matrin type 3                                                             | Zmat3              | 0.26±0.03  |
| zinc finger, matrin type 5                                                             | Zmat5              | 1.31±0.02  |
| zinc finger, matrin-like (predicted)                                                   | Zfml_predicted     | 1.95±1.96  |
| zinc finger, MIZ-type containing 1                                                     | Zmiz1              | 7.25±0.54  |
| zinc finger, MIZ-type containing 2                                                     | Zmiz2              | 4.22±0.97  |
| zinc finger, MYM domain containing 1 (predicted)                                       | Zmym1_predicted    | 0.69±0.2   |
| zinc finger, MYM-type 2                                                                | Zmym2              | 3.32±0.58  |
| zinc finger, MYM-type 4 (predicted)                                                    | Zmym4_predicted    | 1.19±0.08  |
| zinc finger, MYM-type 6                                                                | Zmym6              | 1.61±0.39  |
| zinc finger, MYND domain containing 11                                                 | Zmynd11            | 11.35±0.41 |
| zinc finger, MYND domain containing 15 (predicted)                                     | Zmynd15_predicted  | 0.21±0.24  |
| zinc finger, MYND domain containing 19                                                 | Zmynd19            | 0.47±0.12  |
| zinc finger, MYND domain-containing 10                                                 | Zmynd10            | 0.24±0.06  |
| zinc finger, RAN-binding domain containing 2                                           | Zranb2             | 5.25±0.73  |
| zinc finger, SWIM domain containing 1 (predicted)                                      | Zswim1_predicted   | 1.21±0.26  |
| zinc finger, SWIM domain containing 3 (predicted)                                      | Zswim3_predicted   | 0.39±0.09  |
| zinc finger, SWIM domain containing 4 (predicted)                                      | Zswim4_predicted   | 0.63±0.06  |
| zinc finger, SWIM domain containing 5 (predicted)                                      | Zswim5_predicted   | 0.58±0.06  |
| Zinc finger, ZZ-type with EF hand domain 1 (predicted)                                 | Zzef1_predicted    | 0.49±0.49  |
| Zinc fingers and homeoboxes 2                                                          | Zhx2               | 0.83±0.24  |
| zinc fingers and homeoboxes protein 1                                                  | Zhx1               | 1.65±0.25  |
| Zinc metallopeptidase, STE24 homolog (S. cerevisiae) (predicted)                       | Zmpste24_predicted | 6.76±0.4   |
| zinc ribbon domain containing, 1                                                       | Znrd1              | 1.57±0.16  |
| ZUBR1                                                                                  | Rbaf600            | 2.33±0.56  |
| ZW10 homolog (Drosophila), centromere/kinetochore protein                              | Zw10               | 1.11±0.03  |
| ZW10 interactor                                                                        | Zwint              | 7.78±0.87  |
| Zwilch, kinetochore associated, homolog (Drosophila)                                   | Zwilch             | 0.39±0.13  |

ZXD family zinc finger C

Zxdc

0.36±0.03
